# Supplementary material for: The S-phase-induced lncRNA SUNO1 promotes cell proliferation by controlling YAP1/Hippo signaling pathway
Source: eLife. 2020 Oct 27;9:e55102. doi: 10.7554/eLife.55102 (PMC7591261; doi:10.7554/eLife.55102)
Supplement: Figure 3—source data 2. [file elife-55102-fig3-data2.xlsx]

## Sheet: NC-1
	U2OS	NC-1	CldU 30' (FITC)	HU 24h	IdU 30' (TR)				Type1	progressing	type4	termination
									type2	1 origin	type5	stalled or 1 termination
file		red	green	red	green		type		type3	2 origin
27			20.4				5
			6.86				5
				11.9			3
			12.62				5
				8.23			3
			5.33				5
			57.85				5
			9.94				5
				10.66			3
				7.88			3
			21.6				5
			15.63				3
26			21.51				5
			31.23				5
			14.85				5
			8.91				5
				4.72			3
			28.08				5
			11.21				5
			9.32				5
			46.62				5
				12.81			3
			39.85				5
			19.67	6.35			1
				12.71			3
				13.11			3
			64.76				5
25			25.02				5
			22.02				5
			16.24				5
			20.7				5
			10.24				5
			35.04				5
				11.78			3
			37.58				5
			8.1				5
				4.94			3
			8.4				5
			12.4				5
				24.59			3
24			36.35				5
			22.32				5
			23.6				5
				40.44			3
			9.73				5
			8.09				5
			12.93				5
				23.97			3
				11.78			3
				21.1			3
			13.68				5
				21.04			3
			27.57				5
				2.49			3
			2.98				5
				22.23			3
				4			3
23			41.91				5
				7.9			3
			5.07				5
			43.16				5
				7.01			3
			33.39				5
			9.99				5
				2.06			3
				12.29			3
			5.33				5
			36.36				5
				24.6			3
				2.27			3
				2.47			3
			21.09				5
			11.98				5
			10.34				5
			16				5
22				11.18			3
			13.82				5
			17.21				5
			13.82				5
			22.33				5
				3.9			3
			23.04				5
				18.84			3
			5.94				5
			12.29				5
			17.66				5
				1.96			3
			9.73				5
			4.62				5
				14.04			3
			22.05				5
21			26.73				5
			20.37				5
				15.17			3
				14.85			3
			22.83				5
				4.21			3
				10.97			3
				36.67			3
			23.15				5
			19.78				5
				13.94			3
			28.26				5
			17.94				5
			19.25				5
			31.16				5
			18.79				5
			48.25				5
			18.77				5
			37.38				5
				18.84			3
			20.82				5
			49.68				5
			29.81				5
20				22.14			3
			26.75				5
			27.66				5
				3.09			3
			7.68				5
			46.69				5
			23.56				5
				11.98			3
				8.44			3
				4.3			3
				4.71			3
			32.49				5
			39.59				5
			12.29				5
			47.42				5
19			16.21				5
				15.26			3
				9.53			3
			18.53				5
			27.44				5
			19.06				5
				1.95			3
			31.13				5
			33.2				5
			23.86				5
				27.65			3
18				2.66			3
				11.07			3
			16.09	14.96			1
				23.05			3
			35.02				5
			22.33				5
				7.38			3
				7.58			3
				2.87			3
				5.03			3
				25.82			3
			13.42				5
			23.88				5
				27.24			3
			46.1				5
			38.03				5
				34.72			3
			9.03				5
			9.83				5
			14.23				5
			3.59				5
			26.93				5
				13.74			3
17			18.33				5
				27.34			3
			45.27				5
				18.43			3
			30				5
				64.67			3
			5.03				5
			9.33				5
				19.77			3
				16.18			3
			6.25				5
				16.59			3
			31.16				5
			43.01				5
				21			3
				9.85			3
			35.86				5
				3.1			3
				2.05			3
			14.66				5
16			17.22				5
			25.6				5
			5.53				5
			26.45				5
			14.98				5
				4.62			3
				5.53			3
				7.39			3
				11.6			3
				3.38			3
			14.96				5
			13.86				5
			16.89				5
			11.26				5
				20.28			3
			12.08				5
			20.64				5
			22.67				5
			18.33				5
			4.61				5
				2.56			3

## Sheet: NC-2
	U2OS	NC-2	CldU 30' (FITC)	HU 24h	IdU 30' (TR)				Type1	progressing	type4	termination
									type2	1 origin	type5	stalled or 1 termination
file		red	green	red	green		type		type3	2 origin
55			28.18				5
			24.48				5
			34.1				5
				13.11			3
			11.06				5
			20.29	1.64			1
			19.97				5
			9.11				5
			16.22				5
			15.81				5
			19.09				5
			29.21				5
			11.6				5
				3.39			3
			12.4				5
			30.46				5
				14.15			3
				25.16			3
				28.71			3
			11.52				5
			8.2				5
			22.88				5
				22.79			3
29				13.43			3
				24.06			3
				5.13			3
			3.07				5
			12.73				5
				2.83			3
			7.69				5
				10.56			3
			26.95				5
				3.58			3
			37.06				5
			23.8				5
			14.77				5
			13.72				5
			42.61				5
			23.67				5
			32.05				5
			27.35	3.89			1
				15.04			3
			30.61				5
30				8.19			3
				22.73			3
			27.24				5
			46.58				5
				7.48			3
			21.75				5
			16.48				5
			18.44				5
				7.47			3
			15.99				5
			30.61				5
			8				5
				2.76			3
				12.19			3
			19.35				5
			16.42				5
				28.28			3
				15.56			3
				17.65			3
			20.89				5
			20.29				5
			9.85				5
				3.38			3
			23.97				5
			22.42				5
			14.75				5
			21.09				5
			8.2				5
				5.44			3
				10.87			3
				6.46			3
				12.7			3
32				8.48			3
				16.86			3
				20.83			3
			13.65				5
			17.43				5
			19.54				5
			20.2				5
			22.08				5
				2.36			3
			51.33				5
			36.98				5
				11.47			3
				8.19			3
			14.96				5
				9.85			3
				4.2			3
			14.18				5
				19.61			3
			24.49				5
			13.79				5
				10.29			3
			16.78				5
			31.64				5
				3.1			3
				33.79			3
				3.9			3
				7.5			3
34			30.71				5
				26.01			3
			11.16				5
			5.23				5
			11.78				5
			4.11				5
				2.36			3
				26.21			3
				24.47			3
				14.78			3
			30.61				5
			14.94				5
				15.26			3
				3.72			3
				13.95			3
			18.57				5
			23.52				5
				8.36			3
			22.76				5
				11.52			3
			9.6				5
			56.14				5
				2.77			3
			31.25				5
			3.03				5
				25.46			3
			12.5				5
36				19.76			3
				22.88			3
				22.72			3
			13.41				5
			6.4				5
			16.61				5
			26.11				5
			32.36				5
			18.94				5
				24.67			3
			30.21				5
				14.74			3
				4.61			3
			28.16				5
			27.54				5
			49.96				5
			13.82				5
			18.02				5
			14.75				5
			49.76				5
				9.56			3
				3.71			3
			22.43				5
			5.53				5
				3.28			3
				2.35			3
38			23.96				5
				15.46			3
			12.4				5
			35.13				5
			8.62				5
				2.39			3
			20.96				5
				8.61			3
			17.94				5
			39.35				5
			21.84				5
				25.91			3
			14.09				5
			9.93				5
			30.43				5
				5.44			3
				17.22			3
			13.72				5
39			31.02	14.44			1
			18.23				5
			17.2				5
				18.16			3
			49.15				5
			12.6				5
			26.41				5
			36.4				5
				7.82			3
				1.96			3
			9.64				5
			30.79				5
				4.3			3
			5.94				5
			13.92				5
			30.33				5
			11.68				5
				15.59			3
			12.31				5
				18.53			3
				7.18			3
				30.65			3
				22.42			3

## Sheet: NC-3
	U2OS	NC-3	CldU 30' (FITC)	HU 24h	IdU 30' (TR)				Type1	progressing	type4	termination
									type2	1 origin	type5	stalled or 1 termination
file		red	green	red	green		type		type3	2 origin
79				14.29			3
				3.69			3
				4.13			3
				14.7			3
			25.09				5
				3.69			3
			3.84				5
			13.83				5
				5.54			3
			13.07				5
			20.02				5
				12.69			3
			15.51				5
			10.27				5
			27.42				5
			13.84				5
			29.09				5
			17.87				5
				13.94			3
				10.07			3
			12.87				5
			18.99				5
				3.1			3
				5.23			3
				3.18			3
				5.65			3
			20.39				5
			9.03				5
			15.38				5
				21.33			3
			10.59				5
			10.51				5
				28.4			3
				8.4			3
				13.05			3
78				22.23			3
				20.48			3
				5.73			3
			20.38				5
			30.87				5
			6.35				5
			29.32				5
			35.99				5
			22.54				5
				19.68			3
				20.78			3
				15.28			3
				29.56			3
				7.99			3
				4.13			3
				32.15			3
			6.57				5
			22.32				5
			14.13				5
			33.68				5
			6.76				5
			20.48				5
			14.85				5
				15.78			3
			12.9				5
			28.99				5
			29.49				5
			30.35				5
			25.9				5
				55.35			3
			25.4				5
				17.3			3
				10.86			3
				19.56			3
				11.38			3
				4.32			3
				2.87			3
77			18.22				5
				24.78			3
				18.86			3
				8.05			3
				3.99			3
			34.83				5
			29.9				5
			16.32				5
			48.88				5
			22.56				5
			31.65				5
			29.09				5
			33.63				5
				24.1			3
			43.91				5
				18.34			3
				6.56			3
			30.31				5
			21.95				5
				6.79			3
			34.5				5
			6.96				5
				3.89			3
				11.57			3
				3.07			3
				3.48			3
			46.42				5
			40.35				5
			57.64				5
			25.61				5
				21.72			3
				8.5			3
			47.51				5
			17.12				5
				7.68			3
			55.29				5
			14.95				5
			32.46				5
74			17				5
			17.92				5
			27.37				5
				8.36			3
				6.86			3
			20.48				5
			32.78				5
			16.21				5
			6.27				5
			32.36				5
				9.64			3
				2.05			3
			21.91				5
			22.12				5
				65.32			3
			29.08				5
			7.7				5
				4.72			3
			5.57				5
			36.15				5
			24.01				5
				16.29			3
			23.04				5
				19.77			3
				6.06			3
				9.84			3
			31.02				5
			27.24				5
68			22.22				5
				4.61			3
			32.99				5
				3.69			3
				38.19			3
				2.05			3
			17.2				5
			6.04				5
			8.71				5
			29.91				5
				11.67			3
				21.19			3
			9.12				5
			38.83				5
			10.44				5
			41.88				5
				15.97			3
63				15.25			3
				9.35			3
				2.46			3
			39.83				5
			24.38				5
				17.2			3
				8.3			3
			23.35				5
			21.82				5
			19.86				5
			25.91				5
				18.58			3
				9.83			3
				10.34			3
				11.77			3
				13.51			3
				15.16			3
			15.97				5
			28.27				5
			56.23				5
				13.82			3
			32.67				5
			19.36				5
				3.69			3
60			19.86				5
			7.38				5
			5.74				5
			2.66				5
			42.18				5
				16.2			3
				2.56			3
			7.62				5
			15.05				5
				15.98			3
				12.29			3
			23.46				5
				3.49			3
			8.31				5
			17.02				5
			55.08				5
			43.82				5
				12.1			3
				5.34			3
				5.73			3
				11.36			3
				3.69			3
				49.8			3
			27.34				5
			26.93				5
			12.9				5
			27.85				5
			17.62				5
			3.9				5
			33.99				5
				13.32			3

## Sheet: siSUNO1-a-1
	U2OS	siSUNO1-a-1	CldU 30' (FITC)	HU 24h	IdU 30' (TR)				Type1	progressing	type4	termination
									type2	1 origin	type5	stalled or 1 termination
file		red	green	red	green		type		type3	2 origin
103				16.5			3
			19.07				5
			12.71				5
				14.15			3
				5.55			3
			10.46				5
			14.25				5
			13.43				5
			23.66				5
			20.17				5
				20.3			3
			17.21				5
			12.81				5
			40.78				5
			11.58				5
			13.11				5
			12.81				5
			16.8				5
				11.18			3
				11.6			3
			15.75				5
			21.56				5
			28.2				5
				9.15			3
				7.99			3
102			47.92				5
				10.34			3
			14.97				5
			20				5
			59.32				5
			13.36				5
			28.17				5
			11.41				5
			25.71	12.09			1
				60.55			3
			34.72				5
			9.28				5
				6.73			3
				14.28			3
			24.98				5
			17.65				5
			33.51				5
			10.26				5
			16.89				5
101			18.39				5
				16.28			3
			32.57				5
			13.48				5
				13.42			3
			18.87				5
				5.87			3
				9.69			3
				18.93			3
			6.56				5
				34.35			3
			25.23				5
				24.95			3
				16			3
			18.14				5
			22.32				5
			20.21	13.94			1
			18.99				5
			9.93				5
			15.98				5
			28.64				5
			22.08				5
				15.12			3
100			65.88				5
				18.23			3
				20.71			3
				36.88			3
			31.85				5
			41.37				5
				8.4			3
			34.11				5
				11.78			3
			17.61				5
			17.48				5
			22.32				5
			22.83				5
			14.13				5
			12.6				5
				3.58			3
				19.66			3
				6.65			3
			31.23				5
			27.85	13.11			1
			3.89				5
			16.9				5
			6.66				5
			5.43				5
			18.14				5
			18.84				5
			9.73				5
			9.52				5
				13.41			3
				20.69			3
			26.87				5
			10.15				5
99			20.6				5
				29.29			3
				26.73			3
			13.31				5
			22.52				5
			26.54				5
			19.66				5
			9.13				5
			25.71				5
			16.49				5
			11.47				5
				18.18			3
			22.15				5
			21				5
			20.2				5
			23.38				5
				4.11			3
98			14.55				5
			12.55				5
				12.96			3
				6.04			3
			28.37				5
			19.05				5
			35.43				5
			16.28				5
				24.48			3
				5.63			3
				18.74			3
			24.19				5
			18.02				5
			10.14				5
			18.75				5
			23.04				5
				10.34			3
				33.91			3
				10.34			3
				11.68			3
			34.81				5
			33.91				5
				11.67			3
			30.72				5
			20.99				5
82				20.83			3
			27.03				5
			15.36				5
			8.43				5
			14.85				5
			14.86				5
			6.15				5
				4.62			3
			25.8				5
			40.8				5
			28.69				5
			33.27				5
96			36.65				5
			48.43				5
			37.88				5
			16.9				5
			25.7				5
				13.77			3
			15.49				5
				12.42			3
				10.14			3
			23.24				5
			9.01				5
			19.76				5
			29.7				5
			10.15				5
			13.74				5
			48.84				5
			18.45				5
			16.7				5
			30.71				5
			9.34				5
			12.52				5
				4.31			3
				18.23			3
				10.99			3
			25.39				5
			4.73				5
			27.95				5
			26.62				5
				9.63			3
90				7.28			3
				13.93			3
			17.53				5
			24.78				5
			24.52				5
				3.58			3
			13.11				5
				7.59			3
				7.4			3
			22.72				5
			25.92				5
			4.3				5
			50.81				5
			11.01				5
			22.47				5
			16.59				5
			23.96				5
				11.47			3
				14.54			3
				24.26			3

## Sheet: siSUNO1-a-2
	U2OS	siSUNO1-a-2	CldU 30' (FITC)	HU 24h	IdU 30' (TR)				Type1	progressing	type4	termination
									type2	1 origin	type5	stalled or 1 termination
file		red	green	red	green		type		type3	2 origin
127			15.46				5
			13.63				5
			52.63				5
			26.62				5
			30.2				5
			52.35				5
			17.01				5
				13.94			3
			19.35				5
			9.73				5
			22.38				5
			15.67				5
			21.69				5
			26.14				5
			12.09				5
			21.56				5
			7.58				5
			27.15				5
			30.94				5
			24.02				5
			18.08				5
			5.87				5
				11.8			3
				36.42			3
			19.22				5
			29				5
124			20.93				5
			18.12				5
			18.84				5
			30.2				5
				2.15			3
			19.56				5
			5.43				5
			17.94	9.93			1
				22.12			3
			11.58				5
			21.51				5
			38.5				5
			9.42				5
				8.4			3
			36.25				5
			25.94				5
			26.11				5
			7.99				5
			21.6				5
			14.34				5
			44.23				5
			21.67				5
				3.39			3
			30				5
104			22.12				5
			7.68				5
			21.81				5
			16.89				5
			16.28				5
			20.1	6.47			1
				14.65			3
			21.03				5
				10.55			3
			3.79				5
			30.85				5
			20.79				5
			9.13				5
			20.81				5
			2.87				5
			7.8				5
				14.95			3
				4.56			3
			12.7	11.88			1
			14.34				5
			15.38				5
				1.64			3
				17.98			3
			20.68				5
				13.52			3
				7.89			3
			2.35				5
				35.42			3
			17.1				5
			14.44				5
			9.43				5
				11.98			3
				6.16			3
			26.52				5
			16.48				5
121				19.2			3
				6.99			3
				15.9			3
			10.5				5
			8.5				5
			27.47				5
			26.17				5
			9.13				5
			22.76				5
				30.22			3
			18.06				5
			19.96				5
				7.58			3
			38.03				5
			9.43				5
			13.72				5
			11.16				5
106			33.3				5
			23.49				5
			12.98				5
			31.99				5
			22.11				5
				3.4			3
			16.25				5
			8.24				5
				14.36			3
			8.7				5
			20.73				5
				9.45			3
				9.23			3
				24.6			3
			43.67				5
			13.78				5
			25.39				5
			31.88				5
118			6.47				5
			12.53				5
			11.02				5
			21.34				5
			26.17				5
				11.57			3
			12.55				5
			39.14				5
			15.47				5
			33.91				5
			19.06				5
				3.3			3
				2.98			3
				23.66			3
			28.35				5
			35.84				5
			24.03				5
			21.52				5
			22.35				5
				23.02			3
				13.97			3
			15.9				5
			27.42	30.07			1
				13.4			3
			19.65				5
			13.61				5
			27.8				5
			36.81				5
			21.8				5
				8.41			3
			45.91				5
				3.86			3
				8.04			3
			11.63				5
112			21.15				5
			18.37				5
			23.92				5
			8.4				5
			41.14				5
				12.2			3
				12.4			3
			3.38				5
			19.51				5
			17.07				5
			26.38				5
			43.01				5
				24.22			3
				18.92			3
			26.75				5
			25.38				5
			16.24				5
				6.79			3
			4.65				5
			27.62				5
				4.2			3
			28.41				5
			17.4				5
			22.45				5
			6.4				5
				2.31			3
			9.07				5
			10.04				5
			6.88				5
			33.67				5
				9.64			3
			20.75	13.61			1
			27.52				5
			10.72				5
			28.41				5
				8.31			3
			13.68				5
			15.67				5
			15.61				5
			22.72				5

## Sheet: siSUNO1-a-3
	U2OS	siSUNO1-a-3	CldU 30' (FITC)	HU 24h	IdU 30' (TR)				Type1	progressing	type4	termination
									type2	1 origin	type5	stalled or 1 termination
file		red	green	red	green		type		type3	2 origin
150			23.7				5
			32.41				5
			29.32				5
			16.52				5
				13.13			3
			9.94				5
			6.28				5
			7.68				5
				3.79			3
				7.12			3
				40.66			3
			9.13				5
			12.9				5
			7.6				5
			10.68				5
			15.48				5
			22.54				5
			26.02				5
			5.65				5
			6.16				5
			9.52				5
			27.57				5
			31.76				5
			25.62				5
			23.15				5
			8.31				5
			38.28				5
			26.13				5
			6.45				5
			19.8				5
			32.88				5
				13.73			3
			10.24				5
			14.14				5
				9.52			3
			18.02				5
			7.88				5
			19.79				5
			27.85				5
129			5.43				5
			11.69				5
				4.92			3
				3.79			3
			14.87				5
				1.85			3
			22.93				5
			17.82				5
			13.45				5
			23.25				5
				12.29			3
			30.82				5
			7.9				5
			10.44				5
				4.5			3
				11.16			3
				4.1			3
				7.17			3
				22.53			3
				22.96			3
			23.24				5
			30.21				5
			8.09				5
			9.83				5
			13.41				5
			37.68				5
			4.3				5
			26.75				5
			20.22				5
			16.6				5
				6.26			3
			26.93				5
			13				5
			9.12				5
			48.33				5
				6.04			3
			34.61				5
			28.47				5
149			24.85				5
			24.13				5
			36.78				5
			16.9				5
			19.4				5
			15.46				5
			7.1				5
			18.67				5
			28.39				5
				2.91			3
			20.41				5
				10.86			3
			16.41				5
				16.18			3
				10.44			3
				4.61			3
				8.5			3
			25.05				5
			6.56				5
			21.94				5
			16.92				5
			11.1				5
			20.69				5
			38.86				5
			33.39				5
			22.77				5
			18.37				5
			12.59				5
				16.72			3
			27.72				5
			9.02				5
			25.29				5
			13.02				5
			8				5
			10.37				5
				5.53			3
			22.06				5
				4.1			3
				1.75			3
			15.7				5
			21.84	11.38			1
			13.28				5
				17.82			3
148				17.22			3
			3.69				5
			31.36				5
				32.99			3
			30.73				5
			24.27				5
			13.83				5
				10.85			3
			12.29				5
			25.8				5
			35.63				5
			3.38				5
				12.8			3
			26.31				5
				14.55			3
				1.95			3
			5.43				5
			33.3				5
				6.8			3
				15.38			3
			27.49				5
			27.85				5
			24.06				5
				9.32			3
			39.93	12.4			1
			23.86				5
			12.8				5
			20.62				5
			34.21				5
			18.53				5
			29.11				5
			21.3				5
			29.82				5
140			15.19				5
			11.63				5
				22.44			3
			20.32				5
			28.19				5
			23.27				5
			22.37				5
			26.08				5
				6.38			3
			6.23				5
			32.97				5
			23.28				5
			14.46				5
			22.79				5
				7.44			3
			16.45				5
			25.92				5
			22.76				5
			14.85				5
			9.22				5
				4.21			3
			18.63				5
			10.64				5
				6.31			3
				18.39			3
				13.33			3
			6.91				5
			15.61				5
			5.89				5
				9.51			3
				11.4			3
			28.52				5
			36.88				5
			56.76				5
			18.9				5
			15.64				5
			24.55				5
			12.05				5
				6.31			3
			28.26				5
			10.51				5
				3.55			3
				5.74			3

## Sheet: stats
	siNC			siSUNO1-a
	1	2	3	1	2	3
total	204	196	210	202	194	196
type 1	1	3	0	3	5	2	progressing
	0.00490196	0.0153061	0	0.0148515	0.0257732	0.0102041
type 2	0	0	0	0	0	0	1st origin
	0	0	0	0	0	0
type 3	77	78	92	62	47	50	2nd origin
	0.377451	0.397959	0.438095	0.306931	0.242268	0.255102
type 4	0	0	0	0	0	0	termination
	0	0	0	0	0	0
type 5	125	115	118	137	142	144	stalled/collapsed or 1st termination
	0.612745	0.586735	0.561905	0.678218	0.731959	0.734694
restart (1+2+4)	1	3	0	3	5	2
	0.00490196	0.0153061	0	0.0148515	0.0257732	0.0102041
new origin	37.7451	39.7959	43.8095	30.6931	24.2268	25.5102
