# Supplementary material for: The S-phase-induced lncRNA SUNO1 promotes cell proliferation by controlling YAP1/Hippo signaling pathway
Source: eLife. 2020 Oct 27;9:e55102. doi: 10.7554/eLife.55102 (PMC7591261; doi:10.7554/eLife.55102)
Supplement: Supplementary file 1. — First sheet ‘gene_count_all’ contains raw counts from HTSeq-count analysis. Second sheet ‘TPM_all’ contains TPM (Transcripts Per Million) as the expression level of each gene in all samples. TPM is calculated using Stringtie. Third sheet ‘list_of_24087_genes’ includes the genes that have quantifiable expression (CPM >= 0.075 in at least two samples). Last sheet ‘biotype_of_24087_genes’ includes the detailed categorization information of these genes. The biotype information is based on Ensemble (https://useast.ensembl.org/info/genome/genebuild/biotypes.html). [file elife-55102-supp1.xlsx]

## Sheet: gene_count_all
ensemble_id	gene_name	gene_biotype	G1_rep1	G1_rep2	G1S_rep1	G1S_rep2	S_rep1	S_rep2	G2_rep1	G2_rep2	M_rep1	M_rep2
ENSG00000000003	TSPAN6	protein_coding	3626	3376	3414	3404	9203	3639	2918	2868	2988	2728
ENSG00000000005	TNMD	protein_coding	0	0	0	0	1	0	0	0	0	1
ENSG00000000419	DPM1	protein_coding	15063	13079	6221	6088	19197	10011	7754	7969	11254	9184
ENSG00000000457	SCYL3	protein_coding	563	544	480	442	1211	539	486	451	591	522
ENSG00000000460	C1orf112	protein_coding	1187	1056	2850	3045	5797	2241	2287	2181	2344	2062
ENSG00000000938	FGR	protein_coding	0	0	0	0	0	0	0	1	0	2
ENSG00000000971	CFH	protein_coding	82	85	188	152	395	164	124	142	47	44
ENSG00000001036	FUCA2	protein_coding	9966	9257	10726	10589	27647	11224	8674	8700	8231	7953
ENSG00000001084	GCLC	protein_coding	4818	4533	4636	4598	10825	4992	3658	3757	5500	4868
ENSG00000001167	NFYA	protein_coding	9035	8603	6159	6586	18617	8590	9620	9792	14668	13100
ENSG00000001460	STPG1	protein_coding	903	924	1077	1101	1857	772	706	715	839	959
ENSG00000001461	NIPAL3	protein_coding	2148	2024	2772	2748	5557	2330	2250	2249	1754	1653
ENSG00000001497	LAS1L	protein_coding	12128	11205	8277	9007	21283	9738	7379	8082	12491	11108
ENSG00000001561	ENPP4	protein_coding	1245	1171	2582	2514	5609	2372	1302	1245	1537	1361
ENSG00000001617	SEMA3F	protein_coding	3591	3462	4227	4384	15565	6084	4141	4188	2549	2678
ENSG00000001626	CFTR	protein_coding	2	3	10	5	11	6	2	3	0	1
ENSG00000001629	ANKIB1	protein_coding	11165	10472	6703	7117	15659	6863	7372	7010	13151	11524
ENSG00000001630	CYP51A1	protein_coding	629	618	694	891	1876	683	441	545	687	763
ENSG00000001631	KRIT1	protein_coding	454	418	520	520	1199	513	593	649	717	556
ENSG00000002016	RAD52	protein_coding	874	971	1580	1387	2265	763	1125	1103	1369	1334
ENSG00000002079	MYH16	transcribed_unitary_pseudogene	795	691	611	609	1973	721	980	1066	762	840
ENSG00000002330	BAD	protein_coding	2605	2321	3821	3757	7478	3159	1709	1966	2549	2771
ENSG00000002549	LAP3	protein_coding	8438	7910	4953	5185	13948	6429	5101	5536	7698	6562
ENSG00000002586	CD99	protein_coding	5120	4691	5676	5313	13767	5692	4550	4622	5470	4933
ENSG00000002587	HS3ST1	protein_coding	0	2	0	0	0	0	0	0	0	0
ENSG00000002726	AOC1	protein_coding	2	0	1	8	20	4	3	3	0	0
ENSG00000002745	WNT16	protein_coding	0	0	0	0	0	0	0	1	0	0
ENSG00000002746	HECW1	protein_coding	165	162	355	332	612	267	265	262	284	288
ENSG00000002822	MAD1L1	protein_coding	8401	8472	6113	6131	16732	7126	8042	7983	11883	10898
ENSG00000002834	LASP1	protein_coding	70021	69284	41966	45005	125979	53465	44589	48165	84444	78295
ENSG00000002919	SNX11	protein_coding	1426	1240	1343	1230	3443	1454	1344	1409	1526	1455
ENSG00000002933	TMEM176A	protein_coding	38	35	60	76	247	70	66	73	44	41
ENSG00000003056	M6PR	protein_coding	28423	27011	18862	19318	55825	23911	20534	21536	26893	22501
ENSG00000003096	KLHL13	protein_coding	326	301	630	666	1216	507	319	330	380	397
ENSG00000003137	CYP26B1	protein_coding	2373	2442	4211	4049	8786	3582	2360	2399	2031	1887
ENSG00000003147	ICA1	protein_coding	58	44	150	175	309	140	80	64	90	91
ENSG00000003249	DBNDD1	protein_coding	708	778	1192	1034	2535	1031	735	753	1031	1126
ENSG00000003393	ALS2	protein_coding	5391	4898	4509	4639	12243	5415	5416	5268	7085	6368
ENSG00000003400	CASP10	protein_coding	29	26	214	217	301	137	154	143	39	31
ENSG00000003402	CFLAR	protein_coding	2048	2129	3292	3293	8458	3709	3298	3532	3369	3257
ENSG00000003436	TFPI	protein_coding	5242	4748	3562	3448	10212	4120	2918	2758	3304	3031
ENSG00000003509	NDUFAF7	protein_coding	3195	2982	3564	3068	6851	3044	3275	3369	2628	2333
ENSG00000003756	RBM5	protein_coding	5038	4843	8133	7332	17460	7157	8956	9128	2712	2514
ENSG00000003987	MTMR7	protein_coding	13	5	12	9	93	51	42	27	14	11
ENSG00000003989	SLC7A2	protein_coding	3309	3055	5353	5437	11216	4492	5500	5634	6997	6449
ENSG00000004059	ARF5	protein_coding	3754	3334	3417	3426	8785	3887	2717	2841	4086	3863
ENSG00000004139	SARM1	protein_coding	436	386	112	97	541	233	150	134	164	198
ENSG00000004142	POLDIP2	protein_coding	14100	13353	9738	9769	24758	10623	7359	8058	14445	14190
ENSG00000004399	PLXND1	protein_coding	5970	5732	9934	10724	44102	15916	12212	12144	6676	7021
ENSG00000004455	AK2	protein_coding	22994	21101	14917	15113	39610	17732	14348	15474	21630	20030
ENSG00000004468	CD38	protein_coding	2	1	2	7	6	2	1	3	5	5
ENSG00000004478	FKBP4	protein_coding	54837	51806	27762	28219	71871	31643	30651	31417	62504	57439
ENSG00000004487	KDM1A	protein_coding	16005	15260	10858	11287	24662	10926	10734	10600	22178	20629
ENSG00000004534	RBM6	protein_coding	9985	10201	7878	7575	23451	9868	12942	13020	18986	16593
ENSG00000004660	CAMKK1	protein_coding	1544	1384	1591	1529	7869	3141	1851	1819	1972	1949
ENSG00000004700	RECQL	protein_coding	13614	12075	12536	13681	38835	17682	12950	12747	9133	8129
ENSG00000004766	VPS50	protein_coding	1092	1002	1388	1485	2588	1089	1247	1143	2040	1853
ENSG00000004776	HSPB6	protein_coding	32	34	34	43	89	41	37	40	61	42
ENSG00000004777	ARHGAP33	protein_coding	293	298	1951	1515	2666	1076	1306	1451	824	906
ENSG00000004779	NDUFAB1	protein_coding	5082	4341	3140	2948	7345	3189	2103	2400	4414	4167
ENSG00000004799	PDK4	protein_coding	107	78	36	47	238	105	41	40	65	41
ENSG00000004809	SLC22A16	protein_coding	5	4	1	2	8	1	2	7	12	13
ENSG00000004838	ZMYND10	protein_coding	85	118	165	125	324	117	132	137	99	95
ENSG00000004846	ABCB5	protein_coding	7	8	49	44	46	34	13	11	10	15
ENSG00000004848	ARX	protein_coding	1	4	12	5	22	10	2	4	2	1
ENSG00000004864	SLC25A13	protein_coding	5248	5228	3876	4108	9352	4092	3440	3378	7578	6740
ENSG00000004866	ST7	protein_coding	1868	1799	1570	1459	3669	1671	1638	1498	1931	1777
ENSG00000004897	CDC27	protein_coding	12564	11666	9514	10033	27668	12845	14528	13835	28915	25049
ENSG00000004939	SLC4A1	protein_coding	3	0	1	4	7	3	5	8	1	1
ENSG00000004948	CALCR	protein_coding	23	24	9	7	68	18	15	18	8	12
ENSG00000004961	HCCS	protein_coding	2521	2426	1633	1594	4151	1816	1555	1601	2750	2495
ENSG00000004975	DVL2	protein_coding	1868	1758	2846	2790	4739	1948	1804	1795	3244	3129
ENSG00000005001	PRSS22	protein_coding	3	3	1	3	29	20	10	5	0	1
ENSG00000005007	UPF1	protein_coding	9798	9197	8411	8779	23411	10143	8587	9081	12931	12533
ENSG00000005020	SKAP2	protein_coding	4	9	16	12	32	18	7	8	3	8
ENSG00000005022	SLC25A5	protein_coding	27232	24687	20650	20596	52294	22142	15808	16482	29180	27713
ENSG00000005059	MCUB	protein_coding	1047	954	1509	1638	3548	1524	1018	982	1022	987
ENSG00000005073	HOXA11	protein_coding	1839	1845	1126	1211	3376	1406	1027	1014	940	882
ENSG00000005075	POLR2J	protein_coding	5683	5621	4415	4612	9933	4294	3071	3358	6472	5689
ENSG00000005100	DHX33	protein_coding	7543	7292	4764	4937	16803	7597	6147	6749	8542	8279
ENSG00000005102	MEOX1	protein_coding	9	13	15	18	135	57	51	36	106	98
ENSG00000005108	THSD7A	protein_coding	2	4	30	27	37	11	19	15	15	9
ENSG00000005156	LIG3	protein_coding	4238	4182	3270	3588	9376	4161	4799	4708	6372	5734
ENSG00000005175	RPAP3	protein_coding	9080	8703	5546	5941	14362	6804	6309	6391	11095	9487
ENSG00000005187	ACSM3	protein_coding	65	87	208	203	262	91	155	120	112	89
ENSG00000005189	REXO5	protein_coding	493	451	1034	920	2512	1043	674	694	711	677
ENSG00000005194	CIAPIN1	protein_coding	2817	2657	2975	3106	6960	3035	2385	2706	4591	4526
ENSG00000005206	SPPL2B	protein_coding	561	617	1953	1547	4256	1304	1605	1872	1256	1407
ENSG00000005238	FAM214B	protein_coding	3558	3623	5147	5077	9166	4004	3354	3368	2431	2314
ENSG00000005243	COPZ2	protein_coding	436	386	961	928	2125	885	630	623	459	501
ENSG00000005249	PRKAR2B	protein_coding	3783	3559	2592	2713	6268	2882	1770	1846	3144	3046
ENSG00000005302	MSL3	protein_coding	3933	3828	2645	2611	6739	2844	3158	2870	4522	4106
ENSG00000005339	CREBBP	protein_coding	17364	18093	8253	9170	24354	9345	14243	13815	31437	27833
ENSG00000005379	TSPOAP1	protein_coding	17	19	112	109	504	189	115	147	34	15
ENSG00000005381	MPO	protein_coding	4	6	1	2	172	93	48	38	2	2
ENSG00000005421	PON1	protein_coding	1	1	0	0	2	1	0	1	1	0
ENSG00000005436	GCFC2	protein_coding	2074	1988	1780	1827	3511	1770	1021	1000	3073	2814
ENSG00000005448	WDR54	protein_coding	2231	2100	2610	2617	6346	2451	1891	1970	2203	2340
ENSG00000005469	CROT	protein_coding	343	310	884	837	1351	578	412	435	461	505
ENSG00000005471	ABCB4	protein_coding	335	317	641	606	1547	684	269	237	266	198
ENSG00000005483	KMT2E	protein_coding	7819	7550	4478	4657	8171	3255	5931	5342	4575	4002
ENSG00000005486	RHBDD2	protein_coding	4152	4034	4980	5062	14766	5477	5416	5270	3666	4035
ENSG00000005513	SOX8	protein_coding	174	168	228	184	2379	1029	242	264	160	177
ENSG00000005700	IBTK	protein_coding	3815	3514	3906	4145	9899	4287	4310	4162	5939	5164
ENSG00000005801	ZNF195	protein_coding	3088	3082	2739	2565	8624	3387	3020	3032	2803	2521
ENSG00000005810	MYCBP2	protein_coding	5392	5359	5398	6754	13233	5721	6902	6710	8187	7319
ENSG00000005812	FBXL3	protein_coding	3544	3475	2736	2748	7111	3194	2826	2787	4155	3625
ENSG00000005844	ITGAL	protein_coding	0	2	3	4	9	3	4	4	4	4
ENSG00000005882	PDK2	protein_coding	1847	1909	2533	2557	5461	2233	1878	1741	2746	2736
ENSG00000005884	ITGA3	protein_coding	93201	86960	51505	50411	194776	76495	61694	63464	81875	81376
ENSG00000005889	ZFX	protein_coding	2462	2246	1419	1391	5160	1958	2004	1894	2433	2259
ENSG00000005893	LAMP2	protein_coding	15501	14466	14899	14581	42043	17905	15000	14548	12362	11423
ENSG00000005961	ITGA2B	protein_coding	6	15	72	60	108	34	43	47	31	38
ENSG00000005981	ASB4	protein_coding	7	6	11	6	57	20	9	27	2	1
ENSG00000006007	GDE1	protein_coding	6103	5666	6734	6745	14606	6446	5315	5192	7226	6849
ENSG00000006015	REX1BD	protein_coding	1159	1124	2049	1881	4448	1877	1298	1450	1398	1532
ENSG00000006016	CRLF1	protein_coding	235	225	617	522	2357	853	800	602	188	203
ENSG00000006025	OSBPL7	protein_coding	632	632	1717	1380	3755	1476	1477	1797	322	362
ENSG00000006042	TMEM98	protein_coding	4111	3966	7602	7583	21170	8217	4767	4735	4272	4349
ENSG00000006047	YBX2	protein_coding	505	519	728	682	1809	641	700	674	661	753
ENSG00000006059	KRT33A	protein_coding	2	5	1	4	72	40	6	13	0	1
ENSG00000006062	MAP3K14	protein_coding	2960	2936	2502	2671	9092	4661	2294	2280	2850	2706
ENSG00000006071	ABCC8	protein_coding	59	49	305	269	562	236	135	133	57	54
ENSG00000006116	CACNG3	protein_coding	1	0	0	1	0	2	0	0	0	0
ENSG00000006118	TMEM132A	protein_coding	5354	5378	9017	8857	26882	10103	7597	8257	4482	4960
ENSG00000006125	AP2B1	protein_coding	29297	28565	21455	23981	56086	23253	20297	19819	32687	30490
ENSG00000006128	TAC1	protein_coding	10	9	7	1	27	2	2	5	4	4
ENSG00000006194	ZNF263	protein_coding	7385	6835	3246	3337	10176	4471	4174	4545	5098	4776
ENSG00000006210	CX3CL1	protein_coding	1630	1613	851	858	2940	1238	523	449	847	927
ENSG00000006282	SPATA20	protein_coding	4308	4310	7735	7415	18501	7582	6883	7318	6882	6924
ENSG00000006283	CACNA1G	protein_coding	482	559	809	816	3149	953	1163	1130	404	517
ENSG00000006327	TNFRSF12A	protein_coding	15251	14379	13940	12460	66251	28740	14232	16054	14510	15498
ENSG00000006377	DLX6	protein_coding	0	0	0	0	0	0	0	0	0	0
ENSG00000006432	MAP3K9	protein_coding	7492	7315	5286	5795	11309	4495	5212	5153	6068	5836
ENSG00000006451	RALA	protein_coding	10010	8805	5904	6162	16194	7517	5963	6397	9713	8410
ENSG00000006453	BAIAP2L1	protein_coding	3881	3572	4225	4161	9758	4367	3959	3604	4856	4428
ENSG00000006459	KDM7A	protein_coding	1503	1351	1216	1327	5185	2795	1240	1239	1253	1000
ENSG00000006468	ETV1	protein_coding	484	427	249	240	541	229	285	281	197	172
ENSG00000006530	AGK	protein_coding	2133	2145	2388	2284	5910	2712	2249	2374	3364	2966
ENSG00000006534	ALDH3B1	protein_coding	1532	1392	3411	3195	6951	2868	1918	1910	2096	2275
ENSG00000006555	TTC22	protein_coding	0	0	0	0	0	0	0	0	0	0
ENSG00000006576	PHTF2	protein_coding	8737	8232	10227	10510	24849	10050	7062	6659	11672	10111
ENSG00000006606	CCL26	protein_coding	216	230	510	510	1270	519	288	355	284	316
ENSG00000006607	FARP2	protein_coding	5817	5549	4239	4651	13302	5950	4360	4471	6053	5804
ENSG00000006611	USH1C	protein_coding	52	53	108	95	231	84	65	70	54	53
ENSG00000006625	GGCT	protein_coding	1585	1420	1558	1806	3579	1672	957	1079	1659	1242
ENSG00000006634	DBF4	protein_coding	5148	4631	4387	4473	10645	5255	8616	8096	17409	14295
ENSG00000006638	TBXA2R	protein_coding	74	84	165	153	325	105	85	105	46	61
ENSG00000006652	IFRD1	protein_coding	6236	5852	3410	3323	8813	4162	2574	2637	3775	3281
ENSG00000006659	LGALS14	protein_coding	0	0	1	0	9	4	9	6	1	0
ENSG00000006695	COX10	protein_coding	1570	1645	843	900	2502	1035	1005	971	2204	1954
ENSG00000006704	GTF2IRD1	protein_coding	2630	2590	2954	2807	7789	3414	2877	2781	5239	5026
ENSG00000006712	PAF1	protein_coding	11364	11686	10081	9834	23887	11182	11018	10835	16421	14176
ENSG00000006715	VPS41	protein_coding	5643	5406	5566	5887	13090	5654	4655	4458	7309	6487
ENSG00000006740	ARHGAP44	protein_coding	306	319	871	948	1537	607	445	455	523	503
ENSG00000006744	ELAC2	protein_coding	7194	7024	5399	5549	14931	6730	6611	6519	9501	8720
ENSG00000006747	SCIN	protein_coding	75	68	89	88	204	73	79	78	46	33
ENSG00000006756	ARSD	protein_coding	8	9	12	13	20	11	7	8	5	7
ENSG00000006757	PNPLA4	protein_coding	580	634	499	474	1331	583	334	423	615	586
ENSG00000006788	MYH13	protein_coding	2	0	0	1	1	0	3	1	0	2
ENSG00000006831	ADIPOR2	protein_coding	19819	18791	14874	15559	42555	19820	17610	17247	24901	21989
ENSG00000006837	CDKL3	protein_coding	201	180	137	105	294	146	85	122	76	82
ENSG00000007001	UPP2	protein_coding	17	9	25	8	23	10	3	8	4	2
ENSG00000007038	PRSS21	protein_coding	0	0	0	1	3	0	7	2	0	0
ENSG00000007047	MARK4	protein_coding	3206	3171	2414	2426	7382	3041	2261	2198	3888	3833
ENSG00000007062	PROM1	protein_coding	1	1	5	4	26	4	9	9	3	3
ENSG00000007080	CCDC124	protein_coding	8781	8612	6125	5959	13644	6259	4333	5182	9229	8783
ENSG00000007129	CEACAM21	protein_coding	4	2	7	13	27	11	6	6	0	2
ENSG00000007168	PAFAH1B1	protein_coding	6069	5581	4910	5017	12491	5283	5692	5588	8202	7652
ENSG00000007171	NOS2	protein_coding	157	151	469	516	597	272	121	118	154	154
ENSG00000007174	DNAH9	protein_coding	12	8	4	7	17	3	5	4	2	3
ENSG00000007202	KIAA0100	protein_coding	34836	33724	31823	35514	92829	37481	31934	32210	39221	36207
ENSG00000007216	SLC13A2	protein_coding	5	3	0	0	76	34	24	16	0	0
ENSG00000007237	GAS7	protein_coding	460	426	892	928	1850	787	615	510	414	433
ENSG00000007255	TRAPPC6A	protein_coding	166	155	308	324	882	343	239	211	128	124
ENSG00000007264	MATK	protein_coding	47	51	100	93	263	134	79	122	56	60
ENSG00000007306	CEACAM7	protein_coding	0	0	0	0	0	0	0	0	0	0
ENSG00000007312	CD79B	protein_coding	4	1	2	0	6	2	9	4	0	0
ENSG00000007314	SCN4A	protein_coding	99	85	55	92	362	140	247	235	58	81
ENSG00000007341	ST7L	protein_coding	2263	2004	2128	2241	5242	2206	2040	2222	2221	1792
ENSG00000007350	TKTL1	protein_coding	8	7	5	0	17	10	7	4	3	2
ENSG00000007372	PAX6	protein_coding	0	0	1	2	8	4	1	3	0	0
ENSG00000007376	RPUSD1	protein_coding	3144	3005	3238	3209	8930	3658	2645	2891	3047	3556
ENSG00000007384	RHBDF1	protein_coding	919	890	4640	3986	10315	4056	3733	3942	1238	1243
ENSG00000007392	LUC7L	protein_coding	4408	4120	3618	3284	8617	3588	5075	5046	5884	5059
ENSG00000007402	CACNA2D2	protein_coding	164	174	287	351	838	366	262	244	219	202
ENSG00000007516	BAIAP3	protein_coding	103	88	664	541	1331	496	427	465	248	251
ENSG00000007520	TSR3	protein_coding	6674	6445	4787	4492	11434	5137	4240	4269	6485	6653
ENSG00000007541	PIGQ	protein_coding	913	1019	1993	1762	4421	1558	1304	1329	1315	1295
ENSG00000007545	CRAMP1	protein_coding	2578	2454	1916	1762	5875	2244	1656	1832	2338	2317
ENSG00000007866	TEAD3	protein_coding	2308	2412	5206	5147	14387	5910	3786	3937	4057	3970
ENSG00000007908	SELE	protein_coding	6	3	0	0	1	0	0	0	1	0
ENSG00000007923	DNAJC11	protein_coding	4579	4505	3875	3996	10967	4474	4482	4596	8483	7850
ENSG00000007933	FMO3	protein_coding	1	5	2	2	6	3	7	5	2	0
ENSG00000007944	MYLIP	protein_coding	1509	1352	651	673	1928	779	913	828	1285	1284
ENSG00000007952	NOX1	protein_coding	0	0	0	0	0	0	0	0	1	0
ENSG00000007968	E2F2	protein_coding	1147	1068	2144	2151	2446	860	758	784	1176	1186
ENSG00000008018	PSMB1	protein_coding	17724	16328	10848	10746	25681	12108	8923	9677	18387	15940
ENSG00000008056	SYN1	protein_coding	339	373	208	182	2011	854	556	532	63	90
ENSG00000008083	JARID2	protein_coding	8620	8930	2716	2864	10365	4696	3908	3784	3725	3308
ENSG00000008086	CDKL5	protein_coding	974	965	956	1025	2670	1293	832	780	1047	938
ENSG00000008118	CAMK1G	protein_coding	2	3	21	11	29	11	10	10	5	5
ENSG00000008128	CDK11A	protein_coding	34	25	38	31	103	35	30	40	38	39
ENSG00000008130	NADK	protein_coding	2179	1971	2822	2901	6946	2879	1898	2165	3001	3091
ENSG00000008196	TFAP2B	protein_coding	0	0	0	0	2	4	2	1	0	0
ENSG00000008197	TFAP2D	protein_coding	2	4	7	0	5	4	2	0	1	1
ENSG00000008226	DLEC1	protein_coding	0	1	5	7	27	12	7	9	1	6
ENSG00000008256	CYTH3	protein_coding	13582	13247	15833	16445	37979	16847	18265	18343	35147	31664
ENSG00000008277	ADAM22	protein_coding	427	353	876	878	2049	784	766	686	504	445
ENSG00000008282	SYPL1	protein_coding	11917	10969	7549	7212	20723	8644	8678	8668	10940	9278
ENSG00000008283	CYB561	protein_coding	4848	4575	5672	5387	13107	5193	4883	5018	4362	4400
ENSG00000008294	SPAG9	protein_coding	24317	22870	7912	8420	27950	12608	9852	9885	15837	14234
ENSG00000008300	CELSR3	protein_coding	1901	2001	4637	4827	11448	4348	3695	4200	4792	4437
ENSG00000008311	AASS	protein_coding	1133	1000	1684	1624	4164	1683	1584	1570	1307	1181
ENSG00000008323	PLEKHG6	protein_coding	0	0	7	0	4	3	1	5	0	1
ENSG00000008324	SS18L2	protein_coding	1734	1417	1053	1003	2898	1248	805	732	1134	1093
ENSG00000008382	MPND	protein_coding	432	400	408	420	965	315	298	331	518	536
ENSG00000008394	MGST1	protein_coding	1369	1274	1891	1632	4107	1641	1118	1211	1331	1209
ENSG00000008405	CRY1	protein_coding	6401	6128	5026	4832	9070	4138	3618	3605	5125	4913
ENSG00000008438	PGLYRP1	protein_coding	0	0	0	0	1	0	0	0	0	0
ENSG00000008441	NFIX	protein_coding	3792	3929	5451	5545	14193	6053	5332	5436	6315	5722
ENSG00000008513	ST3GAL1	protein_coding	18142	17798	14378	15626	48054	22569	13239	14104	14353	14309
ENSG00000008516	MMP25	protein_coding	90	128	53	57	450	193	88	116	53	74
ENSG00000008517	IL32	protein_coding	1338	1327	1027	1019	4383	2074	1238	1370	1343	1211
ENSG00000008710	PKD1	protein_coding	3966	4114	9067	9373	23150	8928	7729	8515	5240	5690
ENSG00000008735	MAPK8IP2	protein_coding	40	22	26	33	159	57	38	52	25	22
ENSG00000008838	MED24	protein_coding	3473	3434	4268	4078	10533	4355	4324	4490	4859	5070
ENSG00000008853	RHOBTB2	protein_coding	3478	3545	4026	4456	9543	4033	3027	3219	3653	3544
ENSG00000008869	HEATR5B	protein_coding	2830	2764	3495	3543	7413	3209	2825	2831	3067	2875
ENSG00000008952	SEC62	protein_coding	17201	15518	8294	8385	27817	11648	12263	12681	15895	14166
ENSG00000008988	RPS20	protein_coding	60761	52060	42219	45393	103597	47512	32209	36096	62935	57098
ENSG00000009307	CSDE1	protein_coding	131680	127193	63244	67288	158774	72026	61069	59867	144103	125199
ENSG00000009335	UBE3C	protein_coding	5010	4687	3753	4089	10166	4623	4270	4325	6566	5937
ENSG00000009413	REV3L	protein_coding	3686	3222	3571	4199	6109	2442	2839	2712	4287	3774
ENSG00000009694	TENM1	protein_coding	26	24	79	66	187	62	85	51	54	56
ENSG00000009709	PAX7	protein_coding	472	521	788	828	1399	593	495	443	771	714
ENSG00000009724	MASP2	protein_coding	20	27	13	1	11	9	10	6	12	7
ENSG00000009765	IYD	protein_coding	0	1	9	5	32	16	6	10	1	1
ENSG00000009780	FAM76A	protein_coding	384	363	447	414	1223	543	458	403	310	281
ENSG00000009790	TRAF3IP3	protein_coding	6	1	1	4	18	3	7	7	2	6
ENSG00000009830	POMT2	protein_coding	4726	4598	6201	5990	15820	5986	6495	6324	5841	5768
ENSG00000009844	VTA1	protein_coding	10918	11026	5913	6481	16029	7484	6994	7049	13704	11792
ENSG00000009950	MLXIPL	protein_coding	4	2	41	27	64	24	22	25	10	9
ENSG00000009954	BAZ1B	protein_coding	22576	21562	17264	19051	45130	19019	19559	18974	32728	29851
ENSG00000010017	RANBP9	protein_coding	3477	3403	4043	4053	9258	4242	3270	3128	4851	4456
ENSG00000010030	ETV7	protein_coding	28	21	22	27	867	409	223	204	7	6
ENSG00000010072	SPRTN	protein_coding	3137	2895	2104	2158	5056	2193	2491	2461	3230	2870
ENSG00000010165	METTL13	protein_coding	6934	6576	3656	3909	14149	5729	4963	5387	7028	6744
ENSG00000010219	DYRK4	protein_coding	1485	1383	1531	1447	3396	1393	1359	1295	1334	1103
ENSG00000010244	ZNF207	protein_coding	18906	18324	12386	11712	24752	10307	13629	13299	18102	16527
ENSG00000010256	UQCRC1	protein_coding	12341	11248	13883	13967	34044	14296	9659	10201	12894	12893
ENSG00000010270	STARD3NL	protein_coding	7494	6951	5223	5374	13776	5964	4174	4567	7319	6516
ENSG00000010278	CD9	protein_coding	12730	12063	14501	13323	42405	19437	17419	16361	13173	11311
ENSG00000010282	HHATL	protein_coding	0	0	2	4	13	4	6	5	0	2
ENSG00000010292	NCAPD2	protein_coding	31790	30384	26056	29156	67105	27605	33400	31334	56929	56139
ENSG00000010295	IFFO1	protein_coding	382	392	374	369	1016	494	364	389	303	331
ENSG00000010310	GIPR	protein_coding	101	64	97	71	485	170	106	93	21	23
ENSG00000010318	PHF7	protein_coding	590	509	1165	1207	2098	906	592	672	671	699
ENSG00000010319	SEMA3G	protein_coding	328	276	1452	1578	3485	1321	857	932	393	432
ENSG00000010322	NISCH	protein_coding	4550	4451	8985	8393	18979	7139	7206	7568	5772	5757
ENSG00000010327	STAB1	protein_coding	3	5	2	0	9	5	3	6	4	3
ENSG00000010361	FUZ	protein_coding	466	492	749	712	1690	675	492	430	552	594
ENSG00000010379	SLC6A13	protein_coding	26	24	71	43	182	73	43	54	35	24
ENSG00000010404	IDS	protein_coding	10495	10738	9104	9051	26441	11361	11142	10473	9636	9100
ENSG00000010438	PRSS3	protein_coding	0	0	0	0	0	0	0	0	0	1
ENSG00000010539	ZNF200	protein_coding	2880	2673	1780	1851	5779	2598	2074	2171	1879	1673
ENSG00000010610	CD4	protein_coding	5	2	7	18	27	9	13	12	0	3
ENSG00000010626	LRRC23	protein_coding	1345	1277	1078	1112	2387	994	808	814	1679	1483
ENSG00000010671	BTK	protein_coding	34	27	8	9	15	10	7	10	14	8
ENSG00000010704	HFE	protein_coding	2	4	2	3	12	4	3	3	5	6
ENSG00000010803	SCMH1	protein_coding	2243	2315	2988	2970	6286	2677	2613	2374	5656	5214
ENSG00000010810	FYN	protein_coding	2651	2734	2448	2371	5977	2615	2116	2142	2646	2679
ENSG00000010818	HIVEP2	protein_coding	8003	7697	3540	4068	11680	5228	3751	3674	5708	4927
ENSG00000010932	FMO1	protein_coding	0	0	0	0	0	0	0	0	0	0
ENSG00000011007	ELOA	protein_coding	21691	21020	7689	8164	27300	12148	10096	10438	18018	16128
ENSG00000011009	LYPLA2	protein_coding	3594	3800	4909	4906	13389	5890	4413	4790	2164	2360
ENSG00000011021	CLCN6	protein_coding	1982	1936	4376	3944	7823	2951	4363	4259	4384	4080
ENSG00000011028	MRC2	protein_coding	25014	23428	48392	49219	173854	66224	54483	55278	26327	26906
ENSG00000011052	NME1-NME2	protein_coding	0	0	0	0	0	0	0	0	0	0
ENSG00000011083	SLC6A7	protein_coding	1	0	0	0	8	1	1	0	1	1
ENSG00000011105	TSPAN9	protein_coding	4004	3710	3865	3944	13857	5550	3956	4598	3850	3779
ENSG00000011114	BTBD7	protein_coding	4539	4417	2934	3145	7425	3259	3698	3515	5666	5181
ENSG00000011132	APBA3	protein_coding	951	957	1196	1110	2630	1012	882	939	1021	1102
ENSG00000011143	MKS1	protein_coding	1384	1449	2033	2096	4602	2035	1621	1866	2094	1906
ENSG00000011198	ABHD5	protein_coding	2299	2129	2442	2719	6470	3051	1716	1800	1924	1876
ENSG00000011201	ANOS1	protein_coding	6956	6463	6583	6557	19683	7804	6735	6670	7943	7221
ENSG00000011243	AKAP8L	protein_coding	5634	5497	3669	3418	7616	3242	4616	4836	5777	5244
ENSG00000011258	MBTD1	protein_coding	2021	1914	1370	1267	4239	1777	1677	1606	2042	1657
ENSG00000011260	UTP18	protein_coding	8250	7539	3903	3987	9628	4419	4311	4526	8961	8167
ENSG00000011275	RNF216	protein_coding	16525	16365	11675	12367	37227	15974	14700	14612	19965	18920
ENSG00000011295	TTC19	protein_coding	1858	1617	1802	1567	4850	2045	1715	1756	1728	1478
ENSG00000011304	PTBP1	protein_coding	40338	38812	33631	34266	93198	40617	29978	31005	49126	47811
ENSG00000011332	DPF1	protein_coding	496	457	893	699	2038	827	516	557	526	575
ENSG00000011347	SYT7	protein_coding	361	370	451	491	1681	628	621	522	531	479
ENSG00000011376	LARS2	protein_coding	3651	3577	2608	2892	7034	2732	3883	3879	5298	4918
ENSG00000011405	PIK3C2A	protein_coding	13031	12712	10027	10594	25670	10610	10889	10278	13994	12860
ENSG00000011422	PLAUR	protein_coding	13453	13823	8787	7987	46201	22777	11789	12300	8212	7846
ENSG00000011426	ANLN	protein_coding	27243	24964	42842	46516	111466	47755	67738	64273	96349	81907
ENSG00000011451	WIZ	protein_coding	3896	4237	4441	4215	10879	4711	4730	4744	5150	5061
ENSG00000011454	RABGAP1	protein_coding	3014	2716	2993	3302	6399	2700	3499	3353	4924	4371
ENSG00000011465	DCN	protein_coding	5	3	6	4	4	7	3	2	3	1
ENSG00000011478	QPCTL	protein_coding	1526	1532	2464	2299	6348	2261	2174	2313	1526	1554
ENSG00000011485	PPP5C	protein_coding	10043	9971	9031	9222	23000	10157	8749	9277	11996	11435
ENSG00000011523	CEP68	protein_coding	948	862	2476	2528	6233	2805	1578	1580	1510	1480
ENSG00000011566	MAP4K3	protein_coding	5138	4957	3790	3768	7741	3631	3885	3829	5902	5477
ENSG00000011590	ZBTB32	protein_coding	0	1	0	1	3	0	1	1	0	1
ENSG00000011600	TYROBP	protein_coding	0	0	0	1	0	2	1	1	0	0
ENSG00000011638	TMEM159	protein_coding	658	583	1016	1011	1345	549	574	534	695	693
ENSG00000011677	GABRA3	protein_coding	1713	1577	1404	1578	4028	1591	1493	1370	2393	2161
ENSG00000012048	BRCA1	protein_coding	4316	4183	10149	10991	24030	10760	8636	8597	5758	5618
ENSG00000012061	ERCC1	protein_coding	10047	9646	7115	6957	25961	11184	7183	7972	10249	10285
ENSG00000012124	CD22	protein_coding	82	87	75	98	352	143	138	168	59	76
ENSG00000012171	SEMA3B	protein_coding	1332	1371	2911	2646	8375	3212	2385	2478	1170	1170
ENSG00000012174	MBTPS2	protein_coding	1404	1317	1675	1742	5202	2227	1693	1774	1602	1454
ENSG00000012211	PRICKLE3	protein_coding	1394	1520	1510	1318	4703	1985	1742	1696	1388	1292
ENSG00000012223	LTF	protein_coding	38	39	105	97	328	140	91	113	37	44
ENSG00000012232	EXTL3	protein_coding	14988	13911	9542	9953	29330	11705	10468	10965	15064	14662
ENSG00000012504	NR1H4	protein_coding	2	0	0	3	27	15	7	13	0	0
ENSG00000012660	ELOVL5	protein_coding	29952	26937	25271	25038	66544	28887	30015	27734	35404	29376
ENSG00000012779	ALOX5	protein_coding	732	816	3704	3392	6975	2781	1467	1402	1045	1022
ENSG00000012817	KDM5D	protein_coding	0	0	0	0	0	0	0	0	0	0
ENSG00000012822	CALCOCO1	protein_coding	2006	2017	3738	3499	10314	4169	3919	3782	1719	1560
ENSG00000012963	UBR7	protein_coding	3530	3276	4312	4367	9971	4735	2450	2274	3358	2908
ENSG00000012983	MAP4K5	protein_coding	11004	10423	7206	7417	19786	9062	8513	8327	12150	10470
ENSG00000013016	EHD3	protein_coding	2471	2348	1661	1745	5583	2428	2053	2051	2490	2512
ENSG00000013275	PSMC4	protein_coding	11791	11083	7178	7136	17767	7463	5731	6142	11809	11299
ENSG00000013288	MAN2B2	protein_coding	3133	3252	4576	4680	11799	4757	4119	3983	3134	2930
ENSG00000013293	SLC7A14	protein_coding	0	0	0	0	0	0	0	0	0	0
ENSG00000013297	CLDN11	protein_coding	5	14	19	18	99	15	34	45	13	8
ENSG00000013306	SLC25A39	protein_coding	17648	17556	18002	17357	44018	18144	13713	14776	18526	19702
ENSG00000013364	MVP	protein_coding	8484	7939	7899	7665	18488	7452	6158	6749	8986	9440
ENSG00000013374	NUB1	protein_coding	2897	2612	1989	1919	5086	2361	2199	2152	2808	2504
ENSG00000013375	PGM3	protein_coding	4100	3522	3880	3994	8547	3795	2383	2348	2670	2349
ENSG00000013392	RWDD2A	protein_coding	209	176	487	457	752	321	174	172	141	124
ENSG00000013441	CLK1	protein_coding	4241	3805	5069	4745	11509	5024	5946	5667	4041	3383
ENSG00000013503	POLR3B	protein_coding	2196	2023	1348	1443	3786	1636	2186	2205	2878	2382
ENSG00000013523	ANGEL1	protein_coding	1157	1211	2155	2213	4597	1879	1514	1622	1549	1433
ENSG00000013561	RNF14	protein_coding	2190	2044	2369	2404	4480	1968	1770	1892	3281	3121
ENSG00000013563	DNASE1L1	protein_coding	1970	1973	3715	3514	8809	3369	2748	2772	2537	2409
ENSG00000013573	DDX11	protein_coding	5889	5845	7461	6574	16991	6865	6674	7171	5690	5419
ENSG00000013583	HEBP1	protein_coding	1692	1345	2852	2806	5011	2184	1520	1484	1818	1776
ENSG00000013588	GPRC5A	protein_coding	17384	17090	17742	17535	49836	19833	13896	13995	4517	3993
ENSG00000013619	MAMLD1	protein_coding	2109	2464	1145	1145	8051	3689	2277	2033	1372	1266
ENSG00000013725	CD6	protein_coding	0	0	0	0	0	0	0	0	0	0
ENSG00000013810	TACC3	protein_coding	5034	4561	11048	11259	27143	10960	16347	16220	25230	25821
ENSG00000014123	UFL1	protein_coding	3513	3220	3130	3208	8892	3893	2602	2550	2895	2565
ENSG00000014138	POLA2	protein_coding	170	162	708	660	1156	477	300	324	190	192
ENSG00000014164	ZC3H3	protein_coding	3272	3567	3436	3146	8291	3025	3714	3663	6409	6636
ENSG00000014216	CAPN1	protein_coding	6748	6350	6658	6878	15983	6506	5192	5408	7826	8127
ENSG00000014257	ACPP	protein_coding	0	3	3	1	3	2	0	13	0	0
ENSG00000014641	MDH1	protein_coding	11361	10536	8315	8605	19146	8185	5627	5944	10980	10623
ENSG00000014824	SLC30A9	protein_coding	7948	7552	6100	6382	15710	7225	4998	4923	8693	7567
ENSG00000014914	MTMR11	protein_coding	889	885	2134	1929	3989	1662	1262	1383	1114	954
ENSG00000014919	COX15	protein_coding	1225	1131	1606	1542	3127	1311	1241	1300	1364	1292
ENSG00000015133	CCDC88C	protein_coding	55	61	14	16	285	129	82	89	10	17
ENSG00000015153	YAF2	protein_coding	1983	1959	1313	1225	3780	1677	1312	1278	1634	1534
ENSG00000015171	ZMYND11	protein_coding	3637	3614	2498	2609	5816	2622	2404	2382	6360	5244
ENSG00000015285	WAS	protein_coding	11	9	17	9	41	15	18	25	5	4
ENSG00000015413	DPEP1	protein_coding	1	0	1	3	10	5	3	5	1	0
ENSG00000015475	BID	protein_coding	2366	2300	3063	3074	7223	3224	2004	1968	3013	2887
ENSG00000015479	MATR3	protein_coding	204	203	155	146	559	191	236	261	68	43
ENSG00000015520	NPC1L1	protein_coding	24	27	3	4	24	1	6	11	9	14
ENSG00000015532	XYLT2	protein_coding	2865	2664	4601	4362	11691	4535	5005	5307	4949	4676
ENSG00000015568	RGPD5	protein_coding	322	316	392	371	1133	511	466	469	318	348
ENSG00000015592	STMN4	protein_coding	8	1	5	4	36	9	14	21	1	2
ENSG00000015676	NUDCD3	protein_coding	8898	8899	6637	6776	16898	7065	6525	6878	12223	11221
ENSG00000016082	ISL1	protein_coding	8	10	9	8	15	4	0	4	2	1
ENSG00000016391	CHDH	protein_coding	97	81	365	336	705	282	169	148	119	128
ENSG00000016402	IL20RA	protein_coding	37	31	17	32	81	45	14	21	10	6
ENSG00000016490	CLCA1	protein_coding	0	0	1	0	0	0	0	0	0	0
ENSG00000016602	CLCA4	protein_coding	0	1	0	0	0	0	2	0	0	0
ENSG00000016864	GLT8D1	protein_coding	2360	2157	3026	2830	6076	2529	2150	2159	3225	2954
ENSG00000017260	ATP2C1	protein_coding	9879	9025	8614	8528	22129	8881	8228	7857	9998	8613
ENSG00000017427	IGF1	protein_coding	0	3	2	3	82	24	18	19	1	1
ENSG00000017483	SLC38A5	protein_coding	51	38	114	104	346	121	117	151	28	39
ENSG00000017797	RALBP1	protein_coding	16747	15811	14412	15849	33645	15314	13496	13350	24169	21649
ENSG00000018189	RUFY3	protein_coding	3526	3264	4886	4721	10814	4550	4702	4461	4916	4535
ENSG00000018236	CNTN1	protein_coding	1646	1442	1061	1099	2659	974	1320	1227	2313	2069
ENSG00000018280	SLC11A1	protein_coding	2	4	24	19	36	24	18	14	1	3
ENSG00000018408	WWTR1	protein_coding	7587	7604	3862	4043	18815	8670	4885	4582	4208	3827
ENSG00000018510	AGPS	protein_coding	17281	16492	12389	12523	35882	15862	14292	13730	18325	15887
ENSG00000018607	ZNF806	unprocessed_pseudogene	3	1	1	2	3	1	2	1	2	0
ENSG00000018610	CXorf56	protein_coding	1814	1684	1021	983	2743	1351	1032	1053	1504	1294
ENSG00000018625	ATP1A2	protein_coding	41	38	634	561	665	310	112	118	67	58
ENSG00000018699	TTC27	protein_coding	4424	4104	1604	1643	6050	2791	2403	2596	4291	3701
ENSG00000018869	ZNF582	protein_coding	512	460	269	247	683	244	240	305	367	319
ENSG00000019102	VSIG2	protein_coding	2	1	1	0	5	2	0	4	1	0
ENSG00000019144	PHLDB1	protein_coding	6659	6608	12114	12515	36239	14832	11884	11827	10344	9943
ENSG00000019169	MARCO	protein_coding	559	493	1256	1184	4887	2521	2747	3141	518	487
ENSG00000019186	CYP24A1	protein_coding	1152	1027	2567	2670	35396	15074	8404	8009	1831	1523
ENSG00000019485	PRDM11	protein_coding	1045	1031	2426	2533	3922	1569	1311	1316	2120	1931
ENSG00000019505	SYT13	protein_coding	33	32	55	78	458	186	199	209	10	10
ENSG00000019549	SNAI2	protein_coding	4884	4574	1477	1507	6532	2982	2228	2118	1055	920
ENSG00000019582	CD74	protein_coding	4	5	8	1	45	13	29	25	1	3
ENSG00000019991	HGF	protein_coding	14	17	3	6	24	10	3	4	2	0
ENSG00000019995	ZRANB1	protein_coding	4199	4168	4378	4383	7556	3343	4189	4072	7327	6246
ENSG00000020129	NCDN	protein_coding	3333	3421	3815	3814	10032	4268	3072	3377	3492	3750
ENSG00000020181	ADGRA2	protein_coding	1177	1242	2938	2874	6373	2266	1367	1431	1541	1524
ENSG00000020219	CCT8L1P	processed_pseudogene	0	0	0	0	0	0	0	0	2	0
ENSG00000020256	ZFP64	protein_coding	4336	4470	3401	3460	7902	3402	3393	3330	4724	4392
ENSG00000020426	MNAT1	protein_coding	3747	3494	2700	2852	6490	3248	2765	2998	5683	4955
ENSG00000020577	SAMD4A	protein_coding	9003	9609	13434	13205	23101	10068	9675	10611	18149	17059
ENSG00000020633	RUNX3	protein_coding	2048	2014	931	899	5733	2570	1100	1260	367	329
ENSG00000020922	MRE11	protein_coding	4119	3668	4727	4579	10771	4709	3812	3649	4788	4345
ENSG00000021300	PLEKHB1	protein_coding	170	183	196	179	487	180	134	160	120	123
ENSG00000021355	SERPINB1	protein_coding	983	925	1361	1445	4588	2176	1430	1510	1023	977
ENSG00000021461	CYP3A43	protein_coding	0	1	0	0	3	0	1	0	0	0
ENSG00000021488	SLC7A9	protein_coding	5	2	21	11	58	14	18	21	27	26
ENSG00000021574	SPAST	protein_coding	3727	3396	3218	3241	6390	2566	2751	2579	4201	3893
ENSG00000021645	NRXN3	protein_coding	463	425	2460	2547	7437	3049	3329	3333	1624	1444
ENSG00000021762	OSBPL5	protein_coding	910	819	2359	2286	4879	1997	1783	1795	3020	3152
ENSG00000021776	AQR	protein_coding	6364	6104	4140	4442	10198	4373	4990	4900	6904	6085
ENSG00000021826	CPS1	protein_coding	1982	1970	2028	2036	5722	2114	2457	2251	3140	2792
ENSG00000021852	C8B	protein_coding	0	0	1	0	2	5	0	1	0	0
ENSG00000022267	FHL1	protein_coding	7365	7093	7602	7721	17176	7693	5550	5342	9328	8417
ENSG00000022277	RTF2	protein_coding	9764	9380	5374	5458	13488	6300	5290	5909	11156	8986
ENSG00000022355	GABRA1	protein_coding	471	505	122	117	260	116	111	128	58	54
ENSG00000022556	NLRP2	protein_coding	703	714	761	747	1993	887	786	828	788	805
ENSG00000022567	SLC45A4	protein_coding	771	721	1037	1016	2578	954	862	911	1206	1267
ENSG00000022840	RNF10	protein_coding	13470	12760	8498	8767	19099	7988	7037	7097	15625	15052
ENSG00000022976	ZNF839	protein_coding	227	238	434	400	1993	871	495	576	498	448
ENSG00000023041	ZDHHC6	protein_coding	5933	5417	6545	6477	12817	5475	4813	4804	5390	4705
ENSG00000023171	GRAMD1B	protein_coding	3788	3587	1212	1137	13138	5923	3667	4127	737	704
ENSG00000023191	RNH1	protein_coding	8233	7780	6255	6279	15933	6801	4917	5482	8110	8141
ENSG00000023228	NDUFS1	protein_coding	10121	9801	7347	8028	21900	9475	7402	7678	9603	8632
ENSG00000023287	RB1CC1	protein_coding	13452	11692	6601	7199	14911	6269	7168	6541	12893	11390
ENSG00000023318	ERP44	protein_coding	7554	7175	7106	7120	19442	7727	6780	6272	7043	6024
ENSG00000023330	ALAS1	protein_coding	6175	5926	4411	4423	10783	5004	3989	4247	6145	5771
ENSG00000023445	BIRC3	protein_coding	10545	11071	535	544	16312	10949	487	590	891	740
ENSG00000023516	AKAP11	protein_coding	5458	5462	5721	6180	19078	7966	6354	6375	5879	5101
ENSG00000023572	GLRX2	protein_coding	572	483	387	382	1235	540	293	313	305	243
ENSG00000023608	SNAPC1	protein_coding	5622	5313	11988	12794	28855	13463	10754	12880	15712	12689
ENSG00000023697	DERA	protein_coding	1680	1782	2965	3031	6644	2900	1584	1612	2050	1971
ENSG00000023734	STRAP	protein_coding	30157	28424	12824	12678	34922	17035	15878	15247	30959	26393
ENSG00000023839	ABCC2	protein_coding	172	189	156	117	462	204	171	211	229	226
ENSG00000023892	DEF6	protein_coding	120	141	201	219	487	220	227	270	186	218
ENSG00000023902	PLEKHO1	protein_coding	3025	2767	3376	3353	8792	3677	2367	2431	3493	3445
ENSG00000023909	GCLM	protein_coding	3249	3048	3050	2945	10595	4857	3262	3078	4508	4304
ENSG00000024048	UBR2	protein_coding	4578	4353	3747	4180	9822	3847	4418	4003	3850	3497
ENSG00000024422	EHD2	protein_coding	1583	1791	3682	3650	6727	2594	2399	2228	2591	2505
ENSG00000024526	DEPDC1	protein_coding	3499	3293	4181	4405	7928	3283	8541	8125	18827	16578
ENSG00000024862	CCDC28A	protein_coding	892	796	849	853	1788	817	581	591	954	759
ENSG00000025039	RRAGD	protein_coding	960	894	2072	2164	4452	1992	758	754	824	836
ENSG00000025156	HSF2	protein_coding	1522	1445	1523	1525	2611	1145	1188	1084	1597	1350
ENSG00000025293	PHF20	protein_coding	2639	2473	2407	2593	6083	2757	2403	2522	4277	3981
ENSG00000025423	HSD17B6	protein_coding	98	94	149	156	442	172	150	160	94	105
ENSG00000025434	NR1H3	protein_coding	503	483	648	671	1604	714	540	603	653	567
ENSG00000025708	TYMP	protein_coding	23	31	56	64	128	50	38	37	38	28
ENSG00000025770	NCAPH2	protein_coding	5927	5615	7744	7941	18493	7432	4595	5014	6113	6770
ENSG00000025772	TOMM34	protein_coding	14526	14676	9142	9301	30632	13767	12795	12551	16988	15086
ENSG00000025796	SEC63	protein_coding	14184	13284	8765	8852	24002	10204	11024	10572	12293	10308
ENSG00000025800	KPNA6	protein_coding	8457	8114	7075	7617	17901	7723	7514	7518	7461	6932
ENSG00000026025	VIM	protein_coding	300378	282859	160861	163815	418098	186258	180426	180641	260329	244282
ENSG00000026036	RTEL1-TNFRSF6B	protein_coding	31	35	155	118	290	118	145	194	53	59
ENSG00000026103	FAS	protein_coding	3692	3797	4293	4134	7938	3195	3259	3113	1508	1416
ENSG00000026297	RNASET2	protein_coding	465	485	1064	890	2372	774	662	741	297	296
ENSG00000026508	CD44	protein_coding	41580	39415	19733	19931	89744	37309	38394	40142	34830	31851
ENSG00000026559	KCNG1	protein_coding	4629	4383	4834	4931	17611	7907	4295	4472	5062	5146
ENSG00000026652	AGPAT4	protein_coding	1291	1138	1864	1708	5195	1909	1953	1935	1572	1411
ENSG00000026751	SLAMF7	protein_coding	923	1002	1746	1640	4095	1748	1422	1441	523	554
ENSG00000026950	BTN3A1	protein_coding	175	185	527	550	1053	425	383	407	202	199
ENSG00000027001	MIPEP	protein_coding	1122	1161	1012	1031	2265	1016	714	712	1009	961
ENSG00000027075	PRKCH	protein_coding	3181	2933	2556	2673	8789	4220	2374	2823	3337	2799
ENSG00000027644	INSRR	protein_coding	3	9	10	14	286	90	54	74	3	12
ENSG00000027697	IFNGR1	protein_coding	3268	2830	2373	2350	5907	2558	2012	2028	2974	2616
ENSG00000027847	B4GALT7	protein_coding	1155	1179	1689	1599	4227	1730	1494	1436	1514	1651
ENSG00000027869	SH2D2A	protein_coding	109	148	149	164	5290	2368	1075	1206	15	13
ENSG00000028116	VRK2	protein_coding	5162	5085	5588	6042	14197	6244	5553	5208	7571	6902
ENSG00000028137	TNFRSF1B	protein_coding	12	10	37	38	197	73	18	22	5	2
ENSG00000028203	VEZT	protein_coding	2359	2377	2923	2857	7136	3219	3090	2932	3871	3389
ENSG00000028277	POU2F2	protein_coding	2677	2924	848	797	9634	4205	833	964	531	469
ENSG00000028310	BRD9	protein_coding	5428	5274	2795	2775	12738	5398	5617	6132	6084	5844
ENSG00000028528	SNX1	protein_coding	17299	16522	12362	12497	30161	13039	10813	11338	18249	16809
ENSG00000028839	TBPL1	protein_coding	1410	1324	2049	2051	5500	2490	2523	2566	3060	2639
ENSG00000029153	ARNTL2	protein_coding	3933	3693	6413	6670	16574	7442	3931	4045	4644	4207
ENSG00000029363	BCLAF1	protein_coding	44864	41102	14571	15213	41828	19123	22635	22098	37514	32300
ENSG00000029364	SLC39A9	protein_coding	13291	12683	10315	10557	27881	11226	10467	10409	11400	10385
ENSG00000029534	ANK1	protein_coding	226	204	389	479	1107	452	258	259	300	295
ENSG00000029559	IBSP	protein_coding	1	0	3	0	5	5	5	4	1	2
ENSG00000029639	TFB1M	protein_coding	977	897	673	703	1911	747	705	721	1214	1099
ENSG00000029725	RABEP1	protein_coding	4731	4444	3968	4413	11912	5519	4585	4557	7395	6474
ENSG00000029993	HMGB3	protein_coding	7745	7102	3818	3899	9258	4424	4722	4549	12058	10684
ENSG00000030066	NUP160	protein_coding	12774	11527	8060	8591	24024	10392	8324	8557	10618	9952
ENSG00000030110	BAK1	protein_coding	4925	4539	3034	3297	12179	5375	3772	4401	4420	4374
ENSG00000030304	MUSK	protein_coding	1	0	0	0	1	0	0	0	0	0
ENSG00000030419	IKZF2	protein_coding	763	617	1300	1306	1944	826	487	465	276	236
ENSG00000030582	GRN	protein_coding	11382	11050	16456	15691	42109	15549	12573	12418	9238	9757
ENSG00000031003	FAM13B	protein_coding	3871	3653	3320	3359	9153	4203	4456	4283	6047	5219
ENSG00000031081	ARHGAP31	protein_coding	4600	4551	5552	6316	17662	7712	6701	6123	5646	5429
ENSG00000031691	CENPQ	protein_coding	959	862	1420	1611	3504	1742	1020	929	1021	982
ENSG00000031698	SARS	protein_coding	24685	23094	22487	23056	56877	26839	18130	19140	25143	22529
ENSG00000031823	RANBP3	protein_coding	4289	4204	3493	3331	9268	3890	3811	3742	6419	6302
ENSG00000032219	ARID4A	protein_coding	3280	2739	3283	3390	7012	2934	3170	2761	3350	2864
ENSG00000032389	EIPR1	protein_coding	1172	1021	868	838	1970	889	708	607	1293	1351
ENSG00000032444	PNPLA6	protein_coding	3503	3378	5077	4803	10618	3803	2850	2835	4061	4299
ENSG00000032742	IFT88	protein_coding	735	710	565	564	1178	508	383	428	1035	907
ENSG00000033011	ALG1	protein_coding	2532	2378	1841	1857	5424	2144	2063	2081	2077	2064
ENSG00000033030	ZCCHC8	protein_coding	2933	2846	3955	3601	7608	3210	4423	4315	3812	3473
ENSG00000033050	ABCF2	protein_coding	964	895	535	549	1564	672	575	719	970	861
ENSG00000033100	CHPF2	protein_coding	2020	1929	1149	1065	4510	1746	1351	1439	830	840
ENSG00000033122	LRRC7	protein_coding	54	51	190	157	183	102	39	37	31	30
ENSG00000033170	FUT8	protein_coding	5107	4857	6599	6716	17300	6876	6206	5859	9533	8509
ENSG00000033178	UBA6	protein_coding	10685	9863	8747	8914	20914	9092	10071	9539	12291	11162
ENSG00000033327	GAB2	protein_coding	1632	1630	2744	2853	4682	1760	1467	1571	2334	2173
ENSG00000033627	ATP6V0A1	protein_coding	53	67	166	121	234	96	56	67	25	27
ENSG00000033800	PIAS1	protein_coding	4060	3836	4349	4261	8544	3568	5171	4795	4970	4503
ENSG00000033867	SLC4A7	protein_coding	4875	4906	4343	4313	14473	6213	6017	5584	5020	4444
ENSG00000034053	APBA2	protein_coding	1678	1558	2655	2440	5368	2361	1588	1742	2885	2748
ENSG00000034152	MAP2K3	protein_coding	19840	20060	5463	5451	31213	14939	4816	5365	8888	9449
ENSG00000034239	EFCAB1	protein_coding	23	8	17	7	85	44	24	24	9	14
ENSG00000034510	TMSB10	protein_coding	69254	63204	46826	50080	128643	56501	38065	44996	68676	64095
ENSG00000034533	ASTE1	protein_coding	882	842	673	665	1233	595	416	453	563	526
ENSG00000034677	RNF19A	protein_coding	7749	7643	6098	5970	13571	5663	5236	4858	6611	5909
ENSG00000034693	PEX3	protein_coding	1939	1826	1612	1733	3883	1836	1284	1453	2179	1864
ENSG00000034713	GABARAPL2	protein_coding	5076	4444	4033	3970	9059	4208	3031	3014	4335	3808
ENSG00000034971	MYOC	protein_coding	0	0	0	0	0	0	0	0	0	0
ENSG00000035115	SH3YL1	protein_coding	626	552	356	307	963	374	404	388	326	352
ENSG00000035141	FAM136A	protein_coding	13122	12043	9506	9695	27279	13033	10215	10769	13670	11892
ENSG00000035403	VCL	protein_coding	18404	17555	22433	23890	88498	38085	27339	26964	30342	28315
ENSG00000035499	DEPDC1B	protein_coding	3314	2951	2734	2809	6310	2868	3303	3218	8961	8422
ENSG00000035664	DAPK2	protein_coding	103	126	491	394	863	342	247	274	192	140
ENSG00000035681	NSMAF	protein_coding	5881	5943	4893	4985	12733	5857	4147	4026	7980	7030
ENSG00000035687	ADSS	protein_coding	3485	3127	3557	3567	8247	3883	3275	3352	5467	4928
ENSG00000035720	STAP1	protein_coding	0	0	0	0	0	1	0	2	0	2
ENSG00000035862	TIMP2	protein_coding	14636	15364	25118	24605	73100	27597	25137	24166	14713	13638
ENSG00000035928	RFC1	protein_coding	16759	15639	13400	14905	29069	13306	13017	13001	26289	22533
ENSG00000036054	TBC1D23	protein_coding	5935	5726	3881	3966	10667	4655	4140	3997	7990	6695
ENSG00000036257	CUL3	protein_coding	16727	15495	6913	6684	16697	7380	9851	9033	18448	17888
ENSG00000036448	MYOM2	protein_coding	280	289	260	257	1033	427	254	262	255	258
ENSG00000036473	OTC	protein_coding	1	2	0	0	2	1	0	1	0	1
ENSG00000036530	CYP46A1	protein_coding	26	22	33	36	91	21	25	23	8	8
ENSG00000036549	AC118549.1	protein_coding	6279	6084	4045	4485	10487	4693	5592	5468	11889	10369
ENSG00000036565	SLC18A1	protein_coding	1	0	0	0	0	0	0	0	0	1
ENSG00000036672	USP2	protein_coding	30	17	119	96	157	79	18	17	14	8
ENSG00000036828	CASR	protein_coding	1	0	0	0	0	1	0	0	0	0
ENSG00000037042	TUBG2	protein_coding	264	237	521	459	975	418	326	336	313	315
ENSG00000037241	RPL26L1	protein_coding	3405	3159	2063	2156	6854	3542	1884	2100	3084	2582
ENSG00000037280	FLT4	protein_coding	1029	987	2734	2435	6036	2389	1291	1272	1569	1586
ENSG00000037474	NSUN2	protein_coding	24451	23759	12666	12385	43402	19675	20385	21705	31337	27798
ENSG00000037637	FBXO42	protein_coding	699	659	1545	1640	4159	1642	1381	1339	1448	1395
ENSG00000037749	MFAP3	protein_coding	6375	5691	4335	4455	11868	5078	4957	4973	5667	5189
ENSG00000037757	MRI1	protein_coding	1228	1244	2245	2101	3930	1571	1214	1229	1023	1009
ENSG00000037897	METTL1	protein_coding	1168	1271	932	913	3388	1551	1464	1624	1463	1372
ENSG00000037965	HOXC8	protein_coding	2067	2186	1176	1163	2894	1306	1055	1087	1014	888
ENSG00000038002	AGA	protein_coding	990	1021	1136	1083	3193	1348	1070	1030	859	746
ENSG00000038210	PI4K2B	protein_coding	278	267	625	560	1357	653	348	330	496	409
ENSG00000038219	BOD1L1	protein_coding	11611	10665	5072	6368	19654	8656	10009	9705	9571	8402
ENSG00000038274	MAT2B	protein_coding	4809	4594	3329	3357	8156	3583	2852	2805	4960	4658
ENSG00000038295	TLL1	protein_coding	38	50	110	105	304	121	123	92	26	26
ENSG00000038358	EDC4	protein_coding	5612	5907	5367	5514	15634	6637	6201	6397	7233	7179
ENSG00000038382	TRIO	protein_coding	24725	25581	15805	17258	69959	29394	31594	31526	55938	51431
ENSG00000038427	VCAN	protein_coding	41	40	22	16	127	51	77	74	29	28
ENSG00000038532	CLEC16A	protein_coding	5350	5450	4985	5181	15249	5987	5873	5586	8498	8487
ENSG00000038945	MSR1	protein_coding	2	3	18	11	48	16	14	19	10	3
ENSG00000039068	CDH1	protein_coding	82	96	737	778	2372	1072	505	483	170	185
ENSG00000039123	MTREX	protein_coding	13747	12624	7428	8442	18508	8000	8773	8685	15937	14033
ENSG00000039139	DNAH5	protein_coding	122	129	275	291	712	392	267	324	282	268
ENSG00000039319	ZFYVE16	protein_coding	3450	2995	5048	5425	12279	5004	5102	5009	5627	5025
ENSG00000039523	RIPOR1	protein_coding	6429	6898	7910	7929	19052	7846	7500	7289	11848	11112
ENSG00000039537	C6	protein_coding	0	0	0	0	0	0	0	0	1	0
ENSG00000039560	RAI14	protein_coding	17902	17561	12531	13824	36535	16575	13816	13945	26141	22890
ENSG00000039600	SOX30	protein_coding	8	3	3	1	10	8	2	6	9	3
ENSG00000039650	PNKP	protein_coding	2500	2602	2845	2704	8189	3131	3043	3349	2973	3210
ENSG00000039987	BEST2	protein_coding	17	29	10	12	80	22	15	21	20	16
ENSG00000040199	PHLPP2	protein_coding	6135	5808	5092	5545	15384	6494	5805	5751	8654	7940
ENSG00000040275	SPDL1	protein_coding	3986	3817	4158	4242	11661	5211	7563	7217	12351	10803
ENSG00000040341	STAU2	protein_coding	3680	3507	5139	5430	11693	5554	4367	3826	5475	4638
ENSG00000040487	PQLC2	protein_coding	803	821	1781	1648	4876	1969	1319	1414	871	991
ENSG00000040531	CTNS	protein_coding	738	800	1225	1076	2116	868	1022	1024	844	850
ENSG00000040608	RTN4R	protein_coding	629	678	2373	2331	4103	1538	963	792	977	1050
ENSG00000040633	PHF23	protein_coding	4953	4718	3376	3093	11894	4788	4566	5010	4603	4348
ENSG00000040731	CDH10	protein_coding	132	40	192	193	201	78	127	113	21	28
ENSG00000040933	INPP4A	protein_coding	3218	3051	5164	5521	11971	5142	4138	4082	5536	5248
ENSG00000041353	RAB27B	protein_coding	209	169	263	302	480	211	176	169	94	90
ENSG00000041357	PSMA4	protein_coding	21329	19715	13555	13505	33104	15655	13489	13600	22623	19845
ENSG00000041515	MYO16	protein_coding	182	181	495	455	529	238	280	279	485	411
ENSG00000041802	LSG1	protein_coding	12118	11447	6648	6786	21900	9626	9777	9810	10960	10404
ENSG00000041880	PARP3	protein_coding	1005	1006	2360	2007	5665	2469	2065	2138	1347	1223
ENSG00000041982	TNC	protein_coding	61487	56385	27924	30793	117982	50676	44080	45141	38388	37413
ENSG00000041988	THAP3	protein_coding	645	571	650	558	1059	426	656	624	994	991
ENSG00000042062	RIPOR3	protein_coding	3	0	5	4	23	8	10	9	1	3
ENSG00000042088	TDP1	protein_coding	1949	1769	1312	1383	3411	1532	1441	1464	2969	2602
ENSG00000042286	AIFM2	protein_coding	4757	4406	4696	4378	9721	4477	3426	3719	6148	6393
ENSG00000042304	C2orf83	protein_coding	0	0	0	0	0	0	0	1	0	0
ENSG00000042317	SPATA7	protein_coding	347	407	679	608	1110	492	462	461	501	418
ENSG00000042429	MED17	protein_coding	519	450	432	383	1093	525	451	482	351	303
ENSG00000042445	RETSAT	protein_coding	2054	1970	4012	3751	7895	3019	2959	3183	2311	2245
ENSG00000042493	CAPG	protein_coding	1569	1419	3017	2955	6692	3193	2084	2197	2016	1965
ENSG00000042753	AP2S1	protein_coding	7306	7049	7703	7947	18700	7749	5100	5606	7242	7150
ENSG00000042781	USH2A	protein_coding	5	12	6	10	37	12	4	16	2	3
ENSG00000042813	ZPBP	protein_coding	0	0	0	0	0	0	0	0	0	0
ENSG00000042832	TG	protein_coding	8	15	29	30	81	39	66	78	14	12
ENSG00000042980	ADAM28	protein_coding	8	10	157	118	266	112	142	132	6	10
ENSG00000043039	BARX2	protein_coding	89	72	26	26	106	39	26	21	25	45
ENSG00000043093	DCUN1D1	protein_coding	3485	3286	4209	4275	8320	3700	3149	3014	4887	4433
ENSG00000043143	JADE2	protein_coding	4988	4736	3778	4031	12264	4939	5721	5796	8314	8225
ENSG00000043355	ZIC2	protein_coding	6	3	3	6	8	1	2	3	3	0
ENSG00000043462	LCP2	protein_coding	3	3	0	2	24	6	6	19	5	2
ENSG00000043514	TRIT1	protein_coding	3151	2923	2018	1918	5262	2442	2208	2218	3143	2592
ENSG00000043591	ADRB1	protein_coding	3	5	7	1	22	14	1	1	0	0
ENSG00000044012	GUCA2B	protein_coding	0	0	0	0	0	0	1	0	0	0
ENSG00000044090	CUL7	protein_coding	2569	2539	3978	4017	9116	3629	3919	4293	3641	3443
ENSG00000044115	CTNNA1	protein_coding	42470	40207	20254	21838	60548	26713	23175	23056	39487	36434
ENSG00000044446	PHKA2	protein_coding	1443	1451	2041	2035	5404	2262	1971	2046	1981	1800
ENSG00000044459	CNTLN	protein_coding	442	423	1032	1096	2003	923	635	641	960	822
ENSG00000044524	EPHA3	protein_coding	6	5	28	31	48	17	25	13	5	1
ENSG00000044574	HSPA5	protein_coding	105009	94881	66094	63986	223404	92758	87898	82588	86270	75316
ENSG00000046604	DSG2	protein_coding	12068	11398	10930	11342	25147	10042	6423	6169	8993	8688
ENSG00000046647	GEMIN8	protein_coding	221	221	153	148	284	104	151	172	260	237
ENSG00000046651	OFD1	protein_coding	1258	1257	1652	1720	3415	1585	1343	1419	1750	1559
ENSG00000046653	GPM6B	protein_coding	91	100	145	133	348	154	107	85	109	75
ENSG00000046774	MAGEC2	protein_coding	8	4	10	11	35	10	18	7	11	7
ENSG00000046889	PREX2	protein_coding	55	42	141	136	362	175	104	136	56	62
ENSG00000047056	WDR37	protein_coding	547	566	561	585	1857	798	739	744	855	852
ENSG00000047188	YTHDC2	protein_coding	3824	3500	4296	4044	8502	3896	3235	3032	3964	3665
ENSG00000047230	CTPS2	protein_coding	296	258	668	620	1189	496	310	307	506	476
ENSG00000047249	ATP6V1H	protein_coding	2482	2314	2309	2287	5290	2327	2369	2231	1915	1759
ENSG00000047315	POLR2B	protein_coding	24619	23297	17152	17200	45275	20642	21779	21539	26699	23532
ENSG00000047346	FAM214A	protein_coding	789	663	711	680	764	300	327	248	173	149
ENSG00000047365	ARAP2	protein_coding	8190	7950	5859	6577	14638	7293	4979	4941	6618	5771
ENSG00000047410	TPR	protein_coding	22011	20139	19087	20709	48721	20980	25759	25030	29196	25092
ENSG00000047457	CP	protein_coding	11	13	9	19	32	28	15	16	4	5
ENSG00000047578	KIAA0556	protein_coding	1901	1766	2815	2835	7206	2977	2961	2934	4372	4196
ENSG00000047579	DTNBP1	protein_coding	844	775	706	740	1527	647	447	473	1069	949
ENSG00000047597	XK	protein_coding	164	130	315	358	735	381	173	174	187	166
ENSG00000047617	ANO2	protein_coding	2207	2178	4951	4718	15023	5940	3929	3761	4638	4386
ENSG00000047621	C12orf4	protein_coding	3174	2991	2455	2528	7077	3188	2552	2401	3134	2712
ENSG00000047634	SCML1	protein_coding	2749	2559	2534	2261	6681	3180	1973	1944	2041	1787
ENSG00000047644	WWC3	protein_coding	646	609	656	613	1480	636	380	357	494	481
ENSG00000047648	ARHGAP6	protein_coding	58	95	232	279	399	162	126	143	131	125
ENSG00000047662	FAM184B	protein_coding	7	8	8	10	10	4	15	16	29	28
ENSG00000047849	MAP4	protein_coding	36847	37101	26998	29678	78678	31459	33050	32327	58799	56351
ENSG00000047932	GOPC	protein_coding	2631	2389	5790	5751	10083	4409	4414	4425	5735	4596
ENSG00000047936	ROS1	protein_coding	241	276	986	997	4426	1676	2942	2809	517	515
ENSG00000048028	USP28	protein_coding	4811	4414	6207	6913	10798	4299	4439	4139	6483	6137
ENSG00000048052	HDAC9	protein_coding	7511	7741	3010	3013	7213	3616	1270	1288	2336	2192
ENSG00000048140	TSPAN17	protein_coding	11523	10356	9569	9494	28174	12057	8666	9107	12115	11958
ENSG00000048162	NOP16	protein_coding	6372	5965	3391	3131	11283	5183	4530	4931	6896	6667
ENSG00000048342	CC2D2A	protein_coding	1896	1878	1307	1283	2618	1150	1486	1514	2785	2384
ENSG00000048392	RRM2B	protein_coding	20824	19591	19245	19836	35040	15802	14038	13598	12021	10610
ENSG00000048405	ZNF800	protein_coding	2043	1870	1849	1772	4826	2119	1915	1938	2451	2279
ENSG00000048462	TNFRSF17	protein_coding	0	1	1	1	5	1	0	1	2	0
ENSG00000048471	SNX29	protein_coding	458	402	1171	1302	2513	1059	1032	986	1568	1455
ENSG00000048540	LMO3	protein_coding	10	3	8	8	33	5	5	9	12	4
ENSG00000048544	MRPS10	protein_coding	5049	5001	4807	4768	10206	4967	3680	3864	6989	6625
ENSG00000048545	GUCA1A	protein_coding	0	0	0	0	0	0	0	0	0	1
ENSG00000048649	RSF1	protein_coding	7150	6644	6061	6719	17064	7596	10227	9511	11878	10362
ENSG00000048707	VPS13D	protein_coding	4530	4179	4077	5041	10885	4618	5327	5248	7373	6906
ENSG00000048740	CELF2	protein_coding	458	477	496	520	996	496	277	310	381	293
ENSG00000048828	FAM120A	protein_coding	21716	21458	14716	15591	36238	14940	13711	13372	25790	23933
ENSG00000048991	R3HDM1	protein_coding	5724	5857	4585	4947	9996	4440	4652	4114	10472	9388
ENSG00000049089	COL9A2	protein_coding	1289	1214	2928	2501	7102	2811	2143	2258	1197	1209
ENSG00000049130	KITLG	protein_coding	5467	5600	2125	2425	14729	7264	1664	1768	962	813
ENSG00000049167	ERCC8	protein_coding	1260	1207	1033	1081	2521	1168	988	1002	1691	1420
ENSG00000049192	ADAMTS6	protein_coding	6933	7519	5066	4937	17417	8727	5439	5401	5530	5054
ENSG00000049239	H6PD	protein_coding	1029	964	1996	2304	14190	5534	3379	3522	1207	1213
ENSG00000049245	VAMP3	protein_coding	6522	6116	4803	4684	13397	6047	5114	5208	6315	6023
ENSG00000049246	PER3	protein_coding	3748	3911	3870	4024	6621	2823	2774	2509	5427	5005
ENSG00000049247	UTS2	protein_coding	3	3	3	1	16	5	2	1	3	0
ENSG00000049249	TNFRSF9	protein_coding	1936	1926	1615	1703	8742	4136	1109	1250	602	533
ENSG00000049283	EPN3	protein_coding	19	38	174	175	156	62	42	44	17	10
ENSG00000049323	LTBP1	protein_coding	7422	7024	13128	13769	43072	16501	13874	13283	6694	5795
ENSG00000049449	RCN1	protein_coding	14332	12924	14063	12893	36968	15830	12403	12655	14193	12508
ENSG00000049540	ELN	protein_coding	2	3	11	2	16	11	4	2	4	1
ENSG00000049541	RFC2	protein_coding	6632	6188	7175	7321	15155	7041	3894	4223	5303	5450
ENSG00000049618	ARID1B	protein_coding	5293	5936	7570	8276	15877	6575	7835	7417	13110	12065
ENSG00000049656	CLPTM1L	protein_coding	41128	38453	42057	41224	88625	35786	26468	26977	46746	45214
ENSG00000049759	NEDD4L	protein_coding	17530	17204	6120	6196	19389	8812	12370	13034	22552	20857
ENSG00000049768	FOXP3	protein_coding	82	101	91	94	612	249	210	188	96	85
ENSG00000049769	PPP1R3F	protein_coding	169	188	252	225	1085	458	215	236	126	152
ENSG00000049860	HEXB	protein_coding	3678	3373	4004	3812	9842	4004	2968	3016	2997	2731
ENSG00000049883	PTCD2	protein_coding	2207	2113	1453	1432	4050	1661	1569	1552	1681	1442
ENSG00000050030	NEXMIF	protein_coding	36	30	222	306	204	86	39	49	33	39
ENSG00000050130	JKAMP	protein_coding	6329	6217	6035	5653	13973	6013	6108	5671	7487	6649
ENSG00000050165	DKK3	protein_coding	20342	18871	17895	17871	44456	18343	13882	13721	19393	18613
ENSG00000050327	ARHGEF5	protein_coding	45	35	86	71	198	61	41	45	61	55
ENSG00000050344	NFE2L3	protein_coding	2	1	0	0	2	1	0	3	0	0
ENSG00000050393	MCUR1	protein_coding	3810	3556	2932	2886	7556	3392	2246	2379	3584	3324
ENSG00000050405	LIMA1	protein_coding	20651	19493	20593	21484	65239	30758	17977	18923	19402	17612
ENSG00000050426	LETMD1	protein_coding	1683	1570	3787	3375	6287	2367	2922	3028	2038	2040
ENSG00000050438	SLC4A8	protein_coding	1555	1321	868	942	2696	1160	1930	1807	2751	2477
ENSG00000050555	LAMC3	protein_coding	3311	3238	4855	4652	14273	5262	5116	5395	5577	5898
ENSG00000050628	PTGER3	protein_coding	25	24	50	47	94	28	15	15	18	17
ENSG00000050730	TNIP3	protein_coding	48	49	40	60	245	106	79	65	54	40
ENSG00000050748	MAPK9	protein_coding	4135	3944	6410	6406	16968	7023	6713	6184	5114	4739
ENSG00000050767	COL23A1	protein_coding	3	5	0	4	6	5	2	6	4	2
ENSG00000050820	BCAR1	protein_coding	5857	5915	9625	9336	23934	9980	7724	7891	12484	12672
ENSG00000051009	FAM160A2	protein_coding	1873	1879	2537	2378	4796	1943	1919	1960	1944	2031
ENSG00000051108	HERPUD1	protein_coding	7117	6454	7623	7700	41390	18511	7191	7488	7367	6907
ENSG00000051128	HOMER3	protein_coding	1830	1822	1625	1429	3962	1715	1556	1799	1998	1957
ENSG00000051180	RAD51	protein_coding	5	4	5	6	22	8	4	4	5	2
ENSG00000051341	POLQ	protein_coding	2099	1973	8701	8976	19508	7774	8524	8465	6703	5981
ENSG00000051382	PIK3CB	protein_coding	1992	1836	2046	2260	3804	1677	1815	1698	3619	3267
ENSG00000051523	CYBA	protein_coding	4	4	68	50	50	13	35	30	19	9
ENSG00000051596	THOC3	protein_coding	3985	3757	4097	3799	9014	4403	3110	3065	3693	3535
ENSG00000051620	HEBP2	protein_coding	5821	5508	5124	4985	12272	5195	3944	4160	5835	5634
ENSG00000051825	MPHOSPH9	protein_coding	3853	3553	4871	5066	11091	4646	5519	5130	8118	7212
ENSG00000052126	PLEKHA5	protein_coding	4673	4570	4116	4327	9026	3804	5233	4934	5966	5337
ENSG00000052344	PRSS8	protein_coding	12	11	74	62	132	55	75	75	9	14
ENSG00000052723	SIKE1	protein_coding	7131	6628	6151	5999	14370	6282	5332	5602	7033	6620
ENSG00000052749	RRP12	protein_coding	12721	12487	5583	5851	24974	10656	9135	10145	9187	9013
ENSG00000052795	FNIP2	protein_coding	1232	1245	2157	2287	3353	1534	867	916	2203	1900
ENSG00000052802	MSMO1	protein_coding	4097	3760	8958	8962	22604	8687	9834	8522	8124	8001
ENSG00000052841	TTC17	protein_coding	5045	5020	4987	5008	11495	4932	6354	6319	6077	5293
ENSG00000052850	ALX4	protein_coding	23	31	110	104	125	50	28	34	15	30
ENSG00000053108	FSTL4	protein_coding	46	45	88	73	129	44	36	41	22	36
ENSG00000053254	FOXN3	protein_coding	4313	4122	7537	8530	12866	5385	4745	4320	9647	8712
ENSG00000053328	METTL24	protein_coding	1	1	0	1	3	1	0	0	3	1
ENSG00000053371	AKR7A2	protein_coding	1985	1938	3792	3895	8769	3879	2407	2476	2392	2389
ENSG00000053372	MRTO4	protein_coding	13930	12808	5456	5348	18210	8553	7626	8491	12190	12053
ENSG00000053438	NNAT	protein_coding	0	2	0	0	0	0	0	0	0	0
ENSG00000053501	USE1	protein_coding	699	610	453	455	1469	612	480	556	783	788
ENSG00000053524	MCF2L2	protein_coding	87	59	323	321	597	233	206	181	117	107
ENSG00000053702	NRIP2	protein_coding	0	0	1	0	0	1	0	0	2	0
ENSG00000053747	LAMA3	protein_coding	368	296	726	786	7311	3257	3489	3594	121	152
ENSG00000053770	AP5M1	protein_coding	5238	4793	4433	4820	11129	4667	4437	4018	4763	4473
ENSG00000053900	ANAPC4	protein_coding	1564	1398	1633	1648	3748	1586	1387	1430	1971	1807
ENSG00000053918	KCNQ1	protein_coding	7	6	17	17	33	9	4	5	8	15
ENSG00000054116	TRAPPC3	protein_coding	6632	5724	4600	4690	11101	4981	3740	3968	6979	6795
ENSG00000054118	THRAP3	protein_coding	35390	33099	19401	20270	61466	28132	26069	26742	40322	35090
ENSG00000054148	PHPT1	protein_coding	2847	2605	4540	4460	9583	3768	2543	2977	2668	2723
ENSG00000054179	ENTPD2	protein_coding	0	0	0	0	1	2	0	0	4	0
ENSG00000054219	LY75	protein_coding	0	0	0	0	1	0	0	1	1	0
ENSG00000054267	ARID4B	protein_coding	7012	6201	3534	3784	9855	4244	5392	5119	5400	4663
ENSG00000054277	OPN3	protein_coding	123	157	34	30	119	60	51	57	146	106
ENSG00000054282	SDCCAG8	protein_coding	433	426	918	856	2486	1157	881	901	752	675
ENSG00000054356	PTPRN	protein_coding	20474	20910	23728	22511	86054	33440	24973	26726	18866	19443
ENSG00000054392	HHAT	protein_coding	1416	1334	2785	2862	9801	4107	4173	3810	3653	3198
ENSG00000054523	KIF1B	protein_coding	9387	8671	6997	8311	21640	9173	7350	7285	10550	9605
ENSG00000054598	FOXC1	protein_coding	2826	2879	1272	1261	4589	2166	1016	944	689	616
ENSG00000054611	TBC1D22A	protein_coding	2459	2466	2242	2332	5264	2334	2198	2269	4129	3815
ENSG00000054654	SYNE2	protein_coding	3755	3314	14613	19307	38629	14829	10424	9568	6201	5667
ENSG00000054690	PLEKHH1	protein_coding	521	484	2714	2550	6702	2575	1779	1901	1713	1702
ENSG00000054793	ATP9A	protein_coding	2943	2978	5279	5527	16108	6758	2450	2471	2497	2367
ENSG00000054796	SPO11	protein_coding	0	0	0	0	0	0	0	0	0	0
ENSG00000054803	CBLN4	protein_coding	92	75	67	64	194	85	40	46	12	19
ENSG00000054938	CHRDL2	protein_coding	0	0	0	0	1	0	0	0	1	0
ENSG00000054965	FAM168A	protein_coding	5498	5239	5603	6141	11879	4888	5099	5027	9119	8505
ENSG00000054967	RELT	protein_coding	2734	2407	2113	2086	5643	2369	2243	2557	1572	1717
ENSG00000054983	GALC	protein_coding	2991	2840	4183	4048	11367	5116	3485	3732	3285	2919
ENSG00000055044	NOP58	protein_coding	31440	28752	9833	9938	35865	16585	15335	16764	26326	22732
ENSG00000055070	SZRD1	protein_coding	23579	23292	16094	17162	46323	20422	13134	14393	21341	20600
ENSG00000055118	KCNH2	protein_coding	319	325	734	671	1318	536	280	228	243	224
ENSG00000055130	CUL1	protein_coding	3719	3551	2594	2824	6302	2792	2865	2702	5850	5325
ENSG00000055147	FAM114A2	protein_coding	1847	1759	1639	1651	3332	1430	1134	1189	2949	2556
ENSG00000055163	CYFIP2	protein_coding	3626	3879	7447	7776	14163	5827	4170	4072	4504	4364
ENSG00000055208	TAB2	protein_coding	16385	16515	9466	10009	23637	10073	12191	11397	19077	17491
ENSG00000055211	GINM1	protein_coding	5181	4673	5501	5530	14107	6232	3971	4164	3857	3829
ENSG00000055332	EIF2AK2	protein_coding	8970	8615	11472	11704	23725	10519	9472	9146	11120	9886
ENSG00000055483	USP36	protein_coding	18704	18929	7362	7308	32925	14791	11709	12838	14714	13666
ENSG00000055609	KMT2C	protein_coding	3122	3047	2009	2489	5008	1993	2571	2573	3622	3283
ENSG00000055732	MCOLN3	protein_coding	1	1	5	5	7	2	4	6	7	4
ENSG00000055813	CCDC85A	protein_coding	309	309	611	601	1133	502	178	220	206	198
ENSG00000055917	PUM2	protein_coding	12859	12535	9658	10127	24883	10897	12255	11930	21433	18556
ENSG00000055950	MRPL43	protein_coding	4569	4329	2915	2845	6872	3117	2700	2818	4715	4581
ENSG00000055955	ITIH4	protein_coding	2	2	2	1	15	5	11	6	5	7
ENSG00000055957	ITIH1	protein_coding	0	1	0	0	0	0	0	0	1	0
ENSG00000056050	HPF1	protein_coding	2264	1948	1808	1819	3283	1617	1159	1205	2436	2325
ENSG00000056097	ZFR	protein_coding	28652	28233	13917	15108	42464	20074	21713	20939	32838	27057
ENSG00000056277	ZNF280C	protein_coding	934	807	698	634	2603	1105	966	961	449	403
ENSG00000056291	NPFFR2	protein_coding	2167	1969	2094	2019	4101	1614	1298	1258	2168	2064
ENSG00000056487	PHF21B	protein_coding	997	879	1072	1039	2223	883	796	807	928	961
ENSG00000056558	TRAF1	protein_coding	1722	1902	236	241	6608	3758	339	450	334	308
ENSG00000056586	RC3H2	protein_coding	4973	4870	4957	5291	13276	6040	4923	4882	6046	5185
ENSG00000056736	IL17RB	protein_coding	105	124	610	645	1087	431	187	196	61	84
ENSG00000056972	TRAF3IP2	protein_coding	563	558	789	798	1448	627	486	510	499	501
ENSG00000056998	GYG2	protein_coding	588	589	804	819	1413	613	441	414	888	853
ENSG00000057019	DCBLD2	protein_coding	56858	55073	44522	44552	198363	78740	71644	66893	63347	55494
ENSG00000057149	SERPINB3	protein_coding	8	6	1	3	11	5	1	2	7	1
ENSG00000057252	SOAT1	protein_coding	9925	8909	7971	7964	18868	7733	6662	6887	9200	8413
ENSG00000057294	PKP2	protein_coding	1971	1891	5580	5590	8003	3191	1949	1790	3870	3861
ENSG00000057468	MSH4	protein_coding	49	41	27	30	131	32	35	38	29	22
ENSG00000057593	F7	protein_coding	4	2	6	3	3	5	1	1	2	0
ENSG00000057608	GDI2	protein_coding	37894	34505	23576	24838	60030	27176	22993	22821	37985	33771
ENSG00000057657	PRDM1	protein_coding	1712	1680	222	179	1491	750	660	719	283	229
ENSG00000057663	ATG5	protein_coding	3232	3019	1768	1837	3710	1640	1807	1722	4402	3823
ENSG00000057704	TMCC3	protein_coding	159	125	67	76	279	120	111	127	40	37
ENSG00000057757	PITHD1	protein_coding	4766	4791	4373	4294	14296	6563	5184	5553	6071	5504
ENSG00000057935	MTA3	protein_coding	2688	2582	4632	4636	9649	4023	3670	3497	3780	3370
ENSG00000058056	USP13	protein_coding	3938	3571	4770	5187	9522	3982	3938	3772	8613	8050
ENSG00000058063	ATP11B	protein_coding	13391	12710	12122	12650	33352	13498	9976	9515	12717	11477
ENSG00000058085	LAMC2	protein_coding	17037	16436	14608	14563	77597	31994	32450	32258	12431	11818
ENSG00000058091	CDK14	protein_coding	4806	4705	6029	6492	14580	6286	6148	5796	10896	9541
ENSG00000058262	SEC61A1	protein_coding	50516	48498	33940	33892	95932	36570	33032	32283	37475	35731
ENSG00000058272	PPP1R12A	protein_coding	8467	8211	6538	7041	16074	6842	8919	8381	13335	10889
ENSG00000058335	RASGRF1	protein_coding	6132	6532	7642	8232	35192	15372	13716	13755	9011	8493
ENSG00000058404	CAMK2B	protein_coding	14	30	161	153	853	305	124	147	53	68
ENSG00000058453	CROCC	protein_coding	1251	1088	2420	1994	5390	2073	3350	3675	3149	3084
ENSG00000058600	POLR3E	protein_coding	5698	5391	4020	3934	9726	4047	4330	4502	8840	8397
ENSG00000058668	ATP2B4	protein_coding	6245	5824	5900	6397	13770	5311	5398	4919	4964	4554
ENSG00000058673	ZC3H11A	protein_coding	47	29	17	4	26	10	17	24	10	6
ENSG00000058729	RIOK2	protein_coding	5106	4632	2472	2476	6432	3100	3316	3210	4697	4081
ENSG00000058799	YIPF1	protein_coding	1886	1719	1881	1655	4367	1709	1567	1543	1694	1511
ENSG00000058804	NDC1	protein_coding	8080	7625	5851	6007	15589	6216	7320	6980	11275	10056
ENSG00000058866	DGKG	protein_coding	307	266	487	503	930	426	398	441	667	604
ENSG00000059122	FLYWCH1	protein_coding	1990	1995	5022	4949	7442	2760	3047	3184	3342	3479
ENSG00000059145	UNKL	protein_coding	1606	1602	4287	3882	8300	3690	3810	3925	5647	5732
ENSG00000059377	TBXAS1	protein_coding	94	108	166	180	299	150	92	91	103	94
ENSG00000059378	PARP12	protein_coding	1092	1177	1997	1896	5742	2470	2102	2125	1385	1258
ENSG00000059573	ALDH18A1	protein_coding	18418	17038	10624	11045	34872	14570	10970	11219	15120	14128
ENSG00000059588	TARBP1	protein_coding	414	367	573	501	1425	567	409	402	478	400
ENSG00000059691	GATB	protein_coding	1809	1686	1006	1060	2631	1237	1130	1177	1991	1749
ENSG00000059728	MXD1	protein_coding	437	413	600	576	2132	845	755	844	305	243
ENSG00000059758	CDK17	protein_coding	3084	2755	1598	1611	5616	2670	2442	2299	2791	2438
ENSG00000059769	DNAJC25	protein_coding	1671	1544	650	584	2209	976	921	940	1096	881
ENSG00000059804	SLC2A3	protein_coding	7189	6432	3836	3858	11311	4919	4024	3986	2988	2837
ENSG00000059915	PSD	protein_coding	263	253	510	490	1387	448	390	407	258	276
ENSG00000060069	CTDP1	protein_coding	4393	4273	3362	3306	9453	3863	3982	4213	7165	6743
ENSG00000060138	YBX3	protein_coding	50236	51805	38639	38147	91191	40410	32545	33685	46622	44162
ENSG00000060140	STYK1	protein_coding	220	214	705	663	1094	522	370	383	437	405
ENSG00000060237	WNK1	protein_coding	28061	28364	24010	26727	61905	25382	28500	27390	42465	38197
ENSG00000060303	RPS17P5	processed_pseudogene	0	0	0	0	0	0	0	0	0	0
ENSG00000060339	CCAR1	protein_coding	16352	15404	11654	11876	24155	10696	15589	14909	30439	26320
ENSG00000060491	OGFR	protein_coding	10844	10376	10848	10810	27734	12191	10806	12379	15127	14743
ENSG00000060558	GNA15	protein_coding	16	9	28	38	148	91	49	41	9	9
ENSG00000060566	CREB3L3	protein_coding	0	0	6	6	17	7	16	8	0	3
ENSG00000060642	PIGV	protein_coding	540	582	1520	1529	3532	1438	818	765	643	689
ENSG00000060656	PTPRU	protein_coding	2883	2824	6854	6774	15866	6189	5147	5041	2418	2228
ENSG00000060688	SNRNP40	protein_coding	5307	4734	5152	5304	10905	4790	4282	4683	7733	6777
ENSG00000060709	RIMBP2	protein_coding	66	71	318	310	575	216	216	193	136	137
ENSG00000060718	COL11A1	protein_coding	6103	5858	16717	17719	50426	21583	20307	19790	6944	5980
ENSG00000060749	QSER1	protein_coding	15725	15830	12118	13104	33777	13660	19802	17680	25304	21938
ENSG00000060762	MPC1	protein_coding	1165	1033	2109	2047	5215	2206	1404	1469	1195	1132
ENSG00000060971	ACAA1	protein_coding	2343	2254	2767	2756	7053	3038	2629	2800	2162	2052
ENSG00000060982	BCAT1	protein_coding	20831	19560	15204	15773	32116	13982	10412	10604	22287	19642
ENSG00000061273	HDAC7	protein_coding	6578	6385	10379	9620	20149	8103	8984	9933	18556	19150
ENSG00000061337	LZTS1	protein_coding	280	319	1725	1795	1602	641	348	398	359	343
ENSG00000061455	PRDM6	protein_coding	4	7	36	37	34	10	22	26	33	23
ENSG00000061492	WNT8A	protein_coding	0	0	0	0	0	0	0	1	0	0
ENSG00000061656	SPAG4	protein_coding	174	171	424	373	914	367	274	337	107	107
ENSG00000061676	NCKAP1	protein_coding	28614	27622	17439	18364	41785	17888	15522	14849	28989	26958
ENSG00000061794	MRPS35	protein_coding	5553	5084	2935	3078	7470	3776	3402	3515	6870	5791
ENSG00000061918	GUCY1B1	protein_coding	152	112	341	349	551	263	115	95	236	249
ENSG00000061936	SFSWAP	protein_coding	6245	6385	4120	4088	11790	5199	6210	6201	10964	9694
ENSG00000061938	TNK2	protein_coding	2791	2682	4098	3845	13116	4795	5045	5263	4381	4889
ENSG00000061987	MON2	protein_coding	4538	4482	4021	4084	8305	3490	4329	4352	5369	4597
ENSG00000062038	CDH3	protein_coding	12	14	19	36	132	82	51	88	15	10
ENSG00000062096	ARSF	protein_coding	0	0	3	0	4	2	1	2	1	0
ENSG00000062194	GPBP1	protein_coding	12656	11497	5063	5342	13535	5877	6821	6703	14556	12828
ENSG00000062282	DGAT2	protein_coding	977	893	1076	973	2111	893	565	594	848	827
ENSG00000062370	ZNF112	protein_coding	571	509	573	515	960	452	521	591	618	505
ENSG00000062485	CS	protein_coding	23064	24535	19134	19310	47851	20246	17746	17420	27179	24395
ENSG00000062524	LTK	protein_coding	31	32	79	55	177	63	69	82	66	78
ENSG00000062582	MRPS24	protein_coding	116	113	178	176	363	153	138	134	107	111
ENSG00000062598	ELMO2	protein_coding	5087	4981	5755	5901	15216	6526	6082	5774	8989	8446
ENSG00000062650	WAPL	protein_coding	15247	14302	9241	10255	28037	12042	13930	13575	22265	19250
ENSG00000062716	VMP1	protein_coding	24302	21834	27035	24271	64822	26909	26241	24784	13497	11737
ENSG00000062725	APPBP2	protein_coding	4828	4506	6509	6635	16369	6591	7103	7269	8146	7115
ENSG00000062822	POLD1	protein_coding	7582	7323	8497	8540	19446	8070	6156	6604	10333	10432
ENSG00000063015	SEZ6	protein_coding	1	0	5	9	16	2	0	1	4	1
ENSG00000063046	EIF4B	protein_coding	66488	62787	45691	48185	106673	46928	44751	45447	84392	74630
ENSG00000063127	SLC6A16	protein_coding	302	404	851	687	1401	403	607	557	426	419
ENSG00000063169	BICRA	protein_coding	2401	2521	1680	1551	4004	1317	2006	2126	2918	2868
ENSG00000063176	SPHK2	protein_coding	916	1012	1328	1146	3333	1176	1417	1551	1586	1630
ENSG00000063177	RPL18	protein_coding	27895	24606	21547	21885	54896	22223	14593	16607	26395	28099
ENSG00000063180	CA11	protein_coding	1604	1520	1687	1675	4882	2018	1598	1709	1657	1572
ENSG00000063241	ISOC2	protein_coding	3258	2989	3009	2813	7573	3194	2549	2524	3442	3617
ENSG00000063244	U2AF2	protein_coding	40934	40179	21055	20918	54969	24385	23428	25512	39507	36934
ENSG00000063245	EPN1	protein_coding	11606	11581	10719	10201	24465	9955	8433	8435	13307	13666
ENSG00000063322	MED29	protein_coding	2996	2940	4076	4117	9998	4423	3487	3705	2528	2465
ENSG00000063438	AHRR	protein_coding	242	199	882	767	2408	942	720	712	1041	1123
ENSG00000063515	GSC2	protein_coding	6	5	6	2	17	5	1	6	3	3
ENSG00000063587	ZNF275	protein_coding	3011	3158	4085	4052	8681	3949	3343	3487	4730	4640
ENSG00000063601	MTMR1	protein_coding	2381	2322	2597	2414	6746	2913	2685	2753	4442	4111
ENSG00000063660	GPC1	protein_coding	40409	37204	41779	40945	105816	39236	27683	27877	44520	47031
ENSG00000063761	ADCK1	protein_coding	184	207	429	488	1162	486	384	351	352	308
ENSG00000063854	HAGH	protein_coding	1276	1183	2138	2022	4459	2029	1359	1454	1808	1782
ENSG00000063978	RNF4	protein_coding	5914	5733	3930	4131	13599	5964	6643	6639	9408	8544
ENSG00000064012	CASP8	protein_coding	4473	4375	4295	4320	10620	4962	5232	5277	4862	4200
ENSG00000064042	LIMCH1	protein_coding	8917	9372	13205	14186	62317	30045	18323	19576	11901	10101
ENSG00000064102	INTS13	protein_coding	7948	7546	4320	4397	8625	3969	4479	4115	10427	8322
ENSG00000064115	TM7SF3	protein_coding	6753	6640	14205	14176	31305	12122	8604	8135	6338	5981
ENSG00000064195	DLX3	protein_coding	42	57	71	60	231	87	92	75	51	41
ENSG00000064199	SPA17	protein_coding	1882	1761	628	688	1555	657	538	531	2209	1882
ENSG00000064201	TSPAN32	protein_coding	0	0	6	9	14	7	1	2	0	0
ENSG00000064205	WISP2	protein_coding	6	5	29	23	51	10	16	16	3	4
ENSG00000064218	DMRT3	protein_coding	27	39	53	54	74	31	11	15	18	16
ENSG00000064225	ST3GAL6	protein_coding	488	490	586	587	1449	616	414	453	314	303
ENSG00000064270	ATP2C2	protein_coding	0	5	6	20	139	36	45	67	1	1
ENSG00000064300	NGFR	protein_coding	558	523	283	309	1762	553	758	689	246	205
ENSG00000064309	CDON	protein_coding	430	419	1301	1230	2402	808	1140	1129	891	794
ENSG00000064313	TAF2	protein_coding	13197	13177	9786	10166	24541	11044	10724	10959	15579	13565
ENSG00000064393	HIPK2	protein_coding	6979	6788	4904	6023	18842	7897	6296	6365	12123	10759
ENSG00000064419	TNPO3	protein_coding	7499	7387	4911	5584	11424	4939	5322	5429	11024	10374
ENSG00000064489	BORCS8-MEF2B	protein_coding	0	0	3	0	1	1	1	0	0	1
ENSG00000064490	RFXANK	protein_coding	1259	1229	1817	1730	4096	1717	1162	1134	1571	1514
ENSG00000064545	TMEM161A	protein_coding	555	579	755	637	1548	534	472	543	770	772
ENSG00000064547	LPAR2	protein_coding	98	115	580	453	927	294	276	334	236	216
ENSG00000064601	CTSA	protein_coding	7496	7585	10443	9493	25429	10104	8990	8778	7528	6914
ENSG00000064607	SUGP2	protein_coding	6940	6785	9380	9424	18800	7324	10698	10467	12869	12103
ENSG00000064651	SLC12A2	protein_coding	7350	6888	6887	7274	23109	8980	6933	6712	5896	5351
ENSG00000064652	SNX24	protein_coding	1730	1686	2767	2641	4238	1995	1685	1671	4274	3722
ENSG00000064655	EYA2	protein_coding	101	108	793	773	1534	632	291	271	282	266
ENSG00000064666	CNN2	protein_coding	12207	12423	11649	11714	33645	14017	8917	9408	14510	14954
ENSG00000064687	ABCA7	protein_coding	132	168	857	787	1988	680	692	747	200	240
ENSG00000064692	SNCAIP	protein_coding	35	31	46	28	334	136	71	57	106	84
ENSG00000064703	DDX20	protein_coding	7342	6929	5316	5270	11770	5218	5458	5437	6118	5537
ENSG00000064726	BTBD1	protein_coding	10603	9893	6907	7163	18030	8277	6268	6311	10257	9327
ENSG00000064763	FAR2	protein_coding	209	205	439	444	1178	464	313	268	277	292
ENSG00000064787	BCAS1	protein_coding	8	6	9	9	126	68	47	50	2	7
ENSG00000064835	POU1F1	protein_coding	0	0	0	0	0	0	0	0	0	0
ENSG00000064886	CHI3L2	protein_coding	77	60	108	82	209	81	48	56	42	52
ENSG00000064932	SBNO2	protein_coding	2958	2975	2924	2889	10981	4994	2793	2951	4038	4454
ENSG00000064933	PMS1	protein_coding	1148	1201	2266	2173	4609	1814	1663	1673	2508	2168
ENSG00000064961	HMG20B	protein_coding	9497	9300	7236	6825	17211	7818	8174	8245	15107	14165
ENSG00000064989	CALCRL	protein_coding	15	14	52	57	64	37	28	21	7	4
ENSG00000064995	TAF11	protein_coding	6022	5329	4256	4053	10914	4891	4159	4674	5890	5719
ENSG00000064999	ANKS1A	protein_coding	3096	3162	2863	2982	10276	4269	3855	3833	5779	5599
ENSG00000065000	AP3D1	protein_coding	11130	11152	8334	8709	24906	10736	10161	10079	18202	17249
ENSG00000065029	ZNF76	protein_coding	754	736	1658	1554	4634	1895	1592	1633	1798	1873
ENSG00000065054	SLC9A3R2	protein_coding	2253	2184	2071	1951	4658	1857	1862	1889	2445	2563
ENSG00000065057	NTHL1	protein_coding	1122	1208	882	834	1546	618	574	705	1309	1336
ENSG00000065060	UHRF1BP1	protein_coding	3671	3539	11946	13695	17701	7600	3821	3855	8205	7955
ENSG00000065135	GNAI3	protein_coding	19880	18593	13030	13571	35892	16197	13893	13893	21717	19388
ENSG00000065150	IPO5	protein_coding	21911	20667	13940	15319	36283	15097	13106	13189	23444	21403
ENSG00000065154	OAT	protein_coding	13104	11841	15353	16020	36094	15578	10381	10628	13164	11753
ENSG00000065183	WDR3	protein_coding	18795	16967	7189	7844	25371	12306	10724	11634	21449	18048
ENSG00000065243	PKN2	protein_coding	8104	7509	7886	8099	18204	7526	8677	8000	11058	9965
ENSG00000065268	WDR18	protein_coding	3760	3744	2828	2940	6969	2951	2208	2260	4214	4426
ENSG00000065308	TRAM2	protein_coding	7421	7359	11565	12134	25164	9397	13916	13935	15200	14686
ENSG00000065320	NTN1	protein_coding	3115	2855	7923	7832	18382	6661	4523	4781	3625	3705
ENSG00000065325	GLP2R	protein_coding	881	844	3101	3253	11902	5042	3127	3254	1272	1021
ENSG00000065328	MCM10	protein_coding	8162	7692	8283	8814	19728	9016	5888	6091	8987	7939
ENSG00000065357	DGKA	protein_coding	842	793	3515	3155	4972	2204	1494	1759	1194	1211
ENSG00000065361	ERBB3	protein_coding	159	139	415	453	336	156	176	170	373	326
ENSG00000065371	ROPN1	protein_coding	0	0	1	2	1	0	1	1	0	0
ENSG00000065413	ANKRD44	protein_coding	307	302	1515	1438	2384	1063	679	601	642	582
ENSG00000065427	KARS	protein_coding	27682	26294	14870	15764	38228	16470	13686	14306	27104	24991
ENSG00000065457	ADAT1	protein_coding	2083	2201	3417	3706	8824	3944	2596	2638	1978	2149
ENSG00000065485	PDIA5	protein_coding	3124	2837	2983	2870	7784	3207	3219	3174	3494	3229
ENSG00000065491	TBC1D22B	protein_coding	3136	3039	3278	3391	9101	4117	2545	2682	5001	4529
ENSG00000065518	NDUFB4	protein_coding	9016	7792	6613	6952	14613	6523	4097	4633	9222	7800
ENSG00000065526	SPEN	protein_coding	15669	14724	6799	8003	24231	9544	11378	11091	11626	10433
ENSG00000065534	MYLK	protein_coding	3027	3045	7491	8325	17792	6985	4676	4704	4006	3772
ENSG00000065548	ZC3H15	protein_coding	19238	17411	8023	8517	22968	10976	11278	11424	21654	17734
ENSG00000065559	MAP2K4	protein_coding	3931	3611	2763	2982	7520	3286	2929	2824	6456	5770
ENSG00000065600	TMEM206	protein_coding	888	795	1014	994	2230	963	1128	1135	1436	1371
ENSG00000065609	SNAP91	protein_coding	16	32	189	172	285	132	27	31	30	31
ENSG00000065613	SLK	protein_coding	11718	10493	7429	8193	23918	11392	8011	7594	13805	11659
ENSG00000065615	CYB5R4	protein_coding	3337	3320	1715	1810	4382	2059	1649	1630	3087	2738
ENSG00000065618	COL17A1	protein_coding	1148	1106	1915	1853	6845	3119	3554	3644	846	741
ENSG00000065621	GSTO2	protein_coding	1058	977	1418	1359	4094	1641	1203	1304	1050	969
ENSG00000065665	SEC61A2	protein_coding	1907	1824	2290	1977	4810	1804	1760	1655	2121	1903
ENSG00000065675	PRKCQ	protein_coding	510	523	1278	1269	2074	833	697	712	1261	1274
ENSG00000065717	TLE2	protein_coding	934	895	1242	1116	2648	1014	763	752	1304	1444
ENSG00000065802	ASB1	protein_coding	6742	6608	5008	5050	17711	8200	5811	6361	7333	6861
ENSG00000065809	FAM107B	protein_coding	5909	5666	5057	5296	12904	6152	3767	3764	8743	7723
ENSG00000065833	ME1	protein_coding	2188	2058	2494	2669	5676	2468	1272	1227	2684	2459
ENSG00000065882	TBC1D1	protein_coding	10686	9911	11700	12894	26198	10913	8508	8353	15430	14656
ENSG00000065883	CDK13	protein_coding	12468	12208	6948	7269	21342	8748	9624	9594	12444	11114
ENSG00000065911	MTHFD2	protein_coding	19834	18850	32738	35263	73508	35720	16772	17867	22646	20043
ENSG00000065923	SLC9A7	protein_coding	4587	4337	3834	3827	10417	3900	4147	4288	2921	2590
ENSG00000065970	FOXJ2	protein_coding	5455	5292	6542	6872	11075	4545	4861	4733	6238	5979
ENSG00000065978	YBX1	protein_coding	228824	227290	139126	142719	348341	162496	136803	134754	261149	223882
ENSG00000065989	PDE4A	protein_coding	2888	3011	2735	2746	7105	2743	1892	1824	1661	1714
ENSG00000066027	PPP2R5A	protein_coding	3926	3483	2420	2574	4764	2130	1744	1785	3430	3292
ENSG00000066032	CTNNA2	protein_coding	81	101	64	62	157	53	57	71	71	81
ENSG00000066044	ELAVL1	protein_coding	8905	8727	6978	6798	17169	7571	6429	6273	11025	10563
ENSG00000066056	TIE1	protein_coding	55	58	106	94	1784	780	606	617	42	37
ENSG00000066084	DIP2B	protein_coding	5721	5729	4331	5013	11028	4972	6717	6429	9062	8208
ENSG00000066117	SMARCD1	protein_coding	7968	7844	6017	5629	14923	6239	6275	6489	13394	12446
ENSG00000066135	KDM4A	protein_coding	3022	2933	3321	3357	5585	2497	3400	3538	4641	4138
ENSG00000066136	NFYC	protein_coding	6629	6860	4906	4737	11503	5052	5737	5500	8880	8216
ENSG00000066185	ZMYND12	protein_coding	9	1	13	6	24	12	4	3	4	4
ENSG00000066230	SLC9A3	protein_coding	9	7	15	18	87	35	26	26	12	11
ENSG00000066248	NGEF	protein_coding	170	177	346	379	846	413	210	274	227	215
ENSG00000066279	ASPM	protein_coding	3112	2748	6668	7509	22639	9010	27155	24770	26717	23238
ENSG00000066294	CD84	protein_coding	0	0	0	3	0	0	1	0	0	0
ENSG00000066322	ELOVL1	protein_coding	9893	9494	9936	9989	29484	11722	11810	12949	12846	12563
ENSG00000066336	SPI1	protein_coding	6	5	18	7	25	7	6	11	1	8
ENSG00000066379	ZNRD1	protein_coding	976	761	556	583	1398	596	487	629	1067	935
ENSG00000066382	MPPED2	protein_coding	33	44	200	194	523	249	118	119	76	67
ENSG00000066405	CLDN18	protein_coding	0	0	0	0	0	0	0	1	0	1
ENSG00000066422	ZBTB11	protein_coding	9613	9054	4282	4548	9293	3926	5163	5172	6092	5424
ENSG00000066427	ATXN3	protein_coding	1886	1747	1242	1267	3247	1406	1355	1280	2103	1612
ENSG00000066455	GOLGA5	protein_coding	2994	3050	2477	2605	7561	3625	2928	2905	4354	3831
ENSG00000066468	FGFR2	protein_coding	2102	1901	2684	2705	5533	2304	1617	1555	1984	1761
ENSG00000066557	LRRC40	protein_coding	3240	2871	2877	2958	6932	3096	2231	2166	4693	4253
ENSG00000066583	ISOC1	protein_coding	3882	3801	3906	3923	9893	4516	2205	2386	4000	3535
ENSG00000066629	EML1	protein_coding	786	640	735	771	1329	572	447	494	1039	995
ENSG00000066651	TRMT11	protein_coding	1851	1681	1338	1273	3454	1610	1245	1240	1418	1239
ENSG00000066654	THUMPD1	protein_coding	5721	5506	3328	3467	9474	4218	5056	4999	7467	6417
ENSG00000066697	MSANTD3	protein_coding	9232	9037	5432	5664	14494	6951	4870	5221	9190	8056
ENSG00000066735	KIF26A	protein_coding	1177	1116	2054	2306	3722	1305	565	633	1011	1104
ENSG00000066739	ATG2B	protein_coding	907	850	1433	1515	4088	1640	1368	1295	1468	1296
ENSG00000066777	ARFGEF1	protein_coding	8206	8031	6023	6856	15421	6648	6140	5782	12169	10801
ENSG00000066813	ACSM2B	protein_coding	0	0	0	0	0	0	0	0	0	0
ENSG00000066827	ZFAT	protein_coding	1652	1588	599	698	1906	823	1352	1392	1562	1445
ENSG00000066855	MTFR1	protein_coding	3493	3211	2720	2886	4998	2061	1942	1820	4248	4024
ENSG00000066923	STAG3	protein_coding	38	42	13	20	104	40	67	57	48	33
ENSG00000066926	FECH	protein_coding	1475	1407	2280	2237	5332	2373	1404	1339	2100	2023
ENSG00000066933	MYO9A	protein_coding	1684	1564	3207	3680	8488	3567	4240	4253	5301	4868
ENSG00000067048	DDX3Y	protein_coding	0	0	0	0	0	0	0	0	0	0
ENSG00000067057	PFKP	protein_coding	9752	8953	9600	9974	29712	13559	10013	10833	14060	13060
ENSG00000067064	IDI1	protein_coding	2746	2496	4651	4631	10412	4760	3988	3570	4943	4451
ENSG00000067066	SP100	protein_coding	4418	3793	2883	2919	6535	3022	2684	2724	4322	4074
ENSG00000067082	KLF6	protein_coding	14308	13417	5317	5331	18615	10124	8290	8208	3465	3437
ENSG00000067113	PLPP1	protein_coding	619	619	1505	1454	3212	1318	1010	947	825	696
ENSG00000067141	NEO1	protein_coding	4624	4561	7379	7618	18137	7194	5558	5329	5323	4966
ENSG00000067167	TRAM1	protein_coding	21186	19674	19831	18779	54492	24455	22745	20735	20395	17748
ENSG00000067177	PHKA1	protein_coding	1323	1287	2975	3526	6599	2829	1559	1580	1925	1775
ENSG00000067182	TNFRSF1A	protein_coding	9137	9294	8693	8213	32282	13603	9002	8513	7622	7429
ENSG00000067191	CACNB1	protein_coding	1337	1386	2229	1873	6309	2414	2313	2380	1239	1291
ENSG00000067208	EVI5	protein_coding	2356	2224	1416	1593	3711	1650	2453	2482	1654	1521
ENSG00000067221	STOML1	protein_coding	348	350	649	722	1474	606	310	384	491	596
ENSG00000067225	PKM	protein_coding	326632	323001	178381	184439	471538	207168	170037	171588	330785	310184
ENSG00000067248	DHX29	protein_coding	7287	6987	4669	5166	11125	4892	4761	4456	10130	8918
ENSG00000067334	DNTTIP2	protein_coding	14928	14165	5848	6238	21587	10151	10270	9946	13892	12109
ENSG00000067365	METTL22	protein_coding	1908	1833	2531	2426	5600	2274	2214	2170	1760	1854
ENSG00000067369	TP53BP1	protein_coding	7171	6996	7128	7667	17463	7555	8081	7948	8578	7702
ENSG00000067445	TRO	protein_coding	4143	4274	7573	7413	19066	7470	6724	6590	4831	4610
ENSG00000067533	RRP15	protein_coding	5693	4941	1671	1684	7391	3422	2699	2826	5030	4298
ENSG00000067560	RHOA	protein_coding	44897	44689	30259	31357	78495	34587	25621	25863	45709	43093
ENSG00000067596	DHX8	protein_coding	6863	6224	4306	4868	13753	6111	6043	6365	7557	6894
ENSG00000067601	PMS2P4	transcribed_unprocessed_pseudogene	188	177	310	293	637	273	163	179	266	257
ENSG00000067606	PRKCZ	protein_coding	1406	1251	1317	1387	3161	1305	1402	1381	2277	2130
ENSG00000067646	ZFY	protein_coding	0	0	0	0	0	0	0	0	0	0
ENSG00000067704	IARS2	protein_coding	14651	13219	11823	12619	28758	12686	9288	9189	15646	14054
ENSG00000067715	SYT1	protein_coding	118	115	423	436	1167	436	631	625	484	463
ENSG00000067798	NAV3	protein_coding	3715	4049	2359	2272	13160	5597	5548	5572	6666	5882
ENSG00000067829	IDH3G	protein_coding	2657	2666	2240	2129	5547	2464	2371	2445	2741	2846
ENSG00000067836	ROGDI	protein_coding	246	191	444	396	855	245	243	289	287	292
ENSG00000067840	PDZD4	protein_coding	1438	1324	2555	2531	7411	3014	1549	1761	1586	1563
ENSG00000067842	ATP2B3	protein_coding	32	54	192	202	297	99	65	41	96	88
ENSG00000067900	ROCK1	protein_coding	13779	12505	8088	9083	21283	9139	10159	9962	16743	15045
ENSG00000067955	CBFB	protein_coding	10559	9469	6306	6475	30844	14342	8421	8684	9397	8947
ENSG00000067992	PDK3	protein_coding	386	360	621	573	1139	415	347	336	402	417
ENSG00000068001	HYAL2	protein_coding	2513	2419	3187	3023	8641	3618	2794	3082	2890	2759
ENSG00000068024	HDAC4	protein_coding	52	64	116	117	383	130	192	215	206	172
ENSG00000068028	RASSF1	protein_coding	1027	1079	1744	1717	3816	1710	2198	2326	2292	2314
ENSG00000068078	FGFR3	protein_coding	478	445	865	774	1559	620	375	392	221	256
ENSG00000068079	IFI35	protein_coding	11	9	3	5	9	9	13	9	8	1
ENSG00000068097	HEATR6	protein_coding	5732	5493	5215	5275	13791	5614	5273	5099	6271	5633
ENSG00000068120	COASY	protein_coding	7743	7593	6480	6144	16014	6519	5743	5930	9082	8978
ENSG00000068137	PLEKHH3	protein_coding	1372	1375	2491	2228	2819	1186	799	803	1056	1049
ENSG00000068305	MEF2A	protein_coding	5566	5350	4725	4661	12508	5929	4013	3907	5561	5037
ENSG00000068308	OTUD5	protein_coding	6843	6953	5054	5432	16154	6908	6603	6414	5486	5188
ENSG00000068323	TFE3	protein_coding	13717	14060	10817	10842	26712	10937	9701	10440	18175	17862
ENSG00000068354	TBC1D25	protein_coding	1476	1557	2092	2090	4703	1870	1608	1626	2388	2182
ENSG00000068366	ACSL4	protein_coding	5975	5821	4851	5168	19101	8690	7950	7509	8956	7680
ENSG00000068383	INPP5A	protein_coding	1787	1745	1558	1574	3542	1552	1469	1498	3730	3581
ENSG00000068394	GPKOW	protein_coding	3680	3467	2701	2836	6014	2823	2729	2804	4710	4304
ENSG00000068400	GRIPAP1	protein_coding	3900	3822	5979	5526	14646	6924	6739	6779	6025	5326
ENSG00000068438	FTSJ1	protein_coding	11185	10773	8411	8483	26009	11518	9400	9756	13481	13054
ENSG00000068489	PRR11	protein_coding	31462	31229	19557	22129	43354	19146	20108	19895	49550	48598
ENSG00000068615	REEP1	protein_coding	108	122	1085	1147	1805	786	243	238	135	115
ENSG00000068650	ATP11A	protein_coding	9219	8707	12137	13258	35678	14615	12469	12659	16450	15267
ENSG00000068654	POLR1A	protein_coding	15325	15377	9294	10814	30741	12401	13476	14367	19752	18850
ENSG00000068697	LAPTM4A	protein_coding	19510	17906	14677	14774	37648	14849	12853	12280	15123	14248
ENSG00000068724	TTC7A	protein_coding	2048	1984	1962	2047	6020	2339	1818	2027	1554	1665
ENSG00000068745	IP6K2	protein_coding	4794	4244	5084	5093	9768	3933	5245	5196	4800	4567
ENSG00000068781	STON1-GTF2A1L	protein_coding	0	0	0	0	0	0	0	0	0	0
ENSG00000068784	SRBD1	protein_coding	2343	2203	2484	2563	6316	2889	2835	2952	4384	3874
ENSG00000068796	KIF2A	protein_coding	8269	7557	6648	6986	18788	7953	7993	7666	12128	10988
ENSG00000068831	RASGRP2	protein_coding	45	49	105	119	436	171	110	115	73	92
ENSG00000068878	PSME4	protein_coding	23955	22308	11841	12607	32981	14014	12187	12244	23433	21231
ENSG00000068885	IFT80	protein_coding	600	588	1035	917	2327	995	985	941	835	781
ENSG00000068903	SIRT2	protein_coding	1147	1113	1802	1814	3899	1522	1196	1198	1091	1056
ENSG00000068912	ERLEC1	protein_coding	6752	6424	7303	7233	20723	8995	7719	7390	7512	6623
ENSG00000068971	PPP2R5B	protein_coding	491	449	1246	1118	1465	584	657	684	768	749
ENSG00000068976	PYGM	protein_coding	154	141	105	78	296	98	77	93	155	183
ENSG00000068985	PAGE1	protein_coding	22	30	45	23	107	45	41	50	21	18
ENSG00000069011	PITX1	protein_coding	2771	2839	1913	1898	3191	1285	1089	1123	2032	2108
ENSG00000069018	TRPC7	protein_coding	0	0	0	1	24	9	17	14	0	0
ENSG00000069020	MAST4	protein_coding	3048	3187	3049	3226	10536	4541	2814	2917	2392	2319
ENSG00000069122	ADGRF5	protein_coding	195	211	310	357	1527	767	925	871	100	102
ENSG00000069188	SDK2	protein_coding	1071	1099	3548	3758	11164	4032	3438	3221	1497	1586
ENSG00000069206	ADAM7	protein_coding	1	1	0	0	3	0	2	1	0	0
ENSG00000069248	NUP133	protein_coding	6205	5858	4589	5032	10129	4392	4582	4463	7244	6742
ENSG00000069275	NUCKS1	protein_coding	40896	37349	26848	29232	83374	37276	34168	35083	64579	55257
ENSG00000069329	VPS35	protein_coding	10434	9843	8650	9407	23158	10201	9593	9215	11170	9919
ENSG00000069345	DNAJA2	protein_coding	11232	10308	6530	6719	21865	10215	9306	9847	12303	11015
ENSG00000069399	BCL3	protein_coding	1579	1647	571	502	3961	1869	687	669	1274	1349
ENSG00000069424	KCNAB2	protein_coding	1422	1330	2458	2555	7393	3160	2524	2807	2180	2236
ENSG00000069431	ABCC9	protein_coding	388	386	492	471	1439	650	369	383	377	351
ENSG00000069482	GAL	protein_coding	2	1	7	14	42	16	13	23	2	5
ENSG00000069493	CLEC2D	protein_coding	256	210	482	365	1229	403	293	309	238	236
ENSG00000069509	FUNDC1	protein_coding	2259	2100	1472	1469	3386	1500	1379	1388	2747	2324
ENSG00000069535	MAOB	protein_coding	632	460	565	671	3507	1609	1584	1441	573	554
ENSG00000069667	RORA	protein_coding	985	967	1579	1536	3271	1463	1087	1029	806	716
ENSG00000069696	DRD4	protein_coding	26	20	33	32	164	43	59	67	63	77
ENSG00000069702	TGFBR3	protein_coding	667	618	850	861	680	296	337	349	235	228
ENSG00000069764	PLA2G10	protein_coding	1	0	1	1	4	2	1	0	0	0
ENSG00000069812	HES2	protein_coding	0	0	1	0	1	0	2	0	0	0
ENSG00000069849	ATP1B3	protein_coding	10509	9384	8871	8927	22412	9335	6658	7231	9260	8226
ENSG00000069869	NEDD4	protein_coding	6920	6525	5743	6016	16892	7440	6034	5835	10030	8944
ENSG00000069943	PIGB	protein_coding	756	612	866	821	1812	756	646	581	745	652
ENSG00000069956	MAPK6	protein_coding	12162	11318	8968	9220	24299	11273	10203	9978	20008	17250
ENSG00000069966	GNB5	protein_coding	2872	2733	3200	3167	6413	2778	2227	2164	2761	2645
ENSG00000069974	RAB27A	protein_coding	1203	1075	2103	2231	6241	2733	1524	1474	1217	1047
ENSG00000069998	HDHD5	protein_coding	3850	3557	2933	2742	6867	2750	2305	2507	4081	4327
ENSG00000070010	UFD1	protein_coding	18127	17225	16581	16287	33207	14657	12945	12928	16145	14281
ENSG00000070018	LRP6	protein_coding	13041	12475	15747	17302	27314	11764	14544	13605	19581	16741
ENSG00000070019	GUCY2C	protein_coding	2	1	2	0	3	4	6	7	1	0
ENSG00000070031	SCT	protein_coding	0	1	6	5	12	2	1	0	0	1
ENSG00000070047	PHRF1	protein_coding	8619	8390	4403	4513	15040	6249	5970	6477	8187	7505
ENSG00000070061	ELP1	protein_coding	5074	4722	4489	4706	10631	4650	3569	3727	5590	5290
ENSG00000070081	NUCB2	protein_coding	10768	9342	11907	11957	34704	14670	12416	11064	10856	9508
ENSG00000070087	PFN2	protein_coding	12134	11611	12355	12601	26835	12015	8151	8341	13161	11667
ENSG00000070159	PTPN3	protein_coding	1564	1452	2883	2988	6476	2914	2308	2324	3492	3243
ENSG00000070182	SPTB	protein_coding	2409	2434	5491	5935	17054	7312	5156	5077	4159	4011
ENSG00000070190	DAPP1	protein_coding	19	10	65	57	167	63	27	28	13	19
ENSG00000070193	FGF10	protein_coding	7	6	9	6	10	6	2	3	5	2
ENSG00000070214	SLC44A1	protein_coding	3942	3770	5465	5596	12021	4677	3493	3195	4542	4158
ENSG00000070269	TMEM260	protein_coding	1547	1402	1797	1712	4614	1865	1520	1463	1738	1539
ENSG00000070366	SMG6	protein_coding	4006	4076	3758	3954	10290	4448	4401	4464	5969	5543
ENSG00000070367	EXOC5	protein_coding	16700	15848	13322	14721	32813	14508	12916	12352	20331	18091
ENSG00000070371	CLTCL1	protein_coding	1445	1356	4719	4521	7996	3273	2476	2507	3292	3246
ENSG00000070388	FGF22	protein_coding	0	0	2	0	2	1	0	1	0	1
ENSG00000070404	FSTL3	protein_coding	9121	8788	15062	14171	47436	20600	11976	12695	12143	12518
ENSG00000070413	DGCR2	protein_coding	2415	2395	6300	6154	12941	4561	4659	4635	5955	6288
ENSG00000070423	RNF126	protein_coding	2740	2737	2396	2297	6530	2710	2039	2092	3517	3669
ENSG00000070444	MNT	protein_coding	3787	3884	1955	1849	5832	2185	1029	1128	1151	1106
ENSG00000070476	ZXDC	protein_coding	1700	1711	3607	3351	6352	2582	2310	2321	2371	2445
ENSG00000070495	JMJD6	protein_coding	5322	4922	3387	3401	8595	3731	4635	4911	6644	6129
ENSG00000070501	POLB	protein_coding	1760	1643	1539	1463	3386	1581	1243	1266	2152	1830
ENSG00000070526	ST6GALNAC1	protein_coding	0	0	1	5	5	2	5	3	2	0
ENSG00000070540	WIPI1	protein_coding	869	880	2097	2245	4334	1911	1318	1292	975	900
ENSG00000070601	FRMPD1	protein_coding	18	14	77	50	103	51	40	24	45	41
ENSG00000070610	GBA2	protein_coding	4688	4723	6980	6358	16488	6931	7336	7815	6510	6510
ENSG00000070614	NDST1	protein_coding	29641	29013	28630	30945	72476	27915	21908	22458	40133	38845
ENSG00000070669	ASNS	protein_coding	180	191	639	676	668	295	212	229	187	192
ENSG00000070718	AP3M2	protein_coding	3211	3155	4083	4022	7749	3431	2901	3103	3596	3194
ENSG00000070729	CNGB1	protein_coding	3	12	20	16	104	51	44	52	12	6
ENSG00000070731	ST6GALNAC2	protein_coding	0	0	4	5	2	3	0	2	0	0
ENSG00000070748	CHAT	protein_coding	18	27	79	96	332	168	50	42	21	19
ENSG00000070756	PABPC1	protein_coding	197355	201776	110934	110087	271926	117418	124649	116483	222993	192282
ENSG00000070759	TESK2	protein_coding	505	408	425	418	747	355	595	576	527	539
ENSG00000070761	CFAP20	protein_coding	6622	6225	4460	4449	12845	6377	4241	4300	5691	5126
ENSG00000070770	CSNK2A2	protein_coding	12256	11672	7666	7873	26639	11772	10852	10705	16986	14919
ENSG00000070778	PTPN21	protein_coding	4191	4206	6215	6370	14916	6412	5070	4716	8393	7831
ENSG00000070785	EIF2B3	protein_coding	4272	3681	2711	2762	6834	3147	2484	2701	4132	3855
ENSG00000070808	CAMK2A	protein_coding	10	8	27	43	469	213	71	74	13	13
ENSG00000070814	TCOF1	protein_coding	28330	28096	19000	20129	62343	26221	23515	25399	33245	32557
ENSG00000070831	CDC42	protein_coding	116	93	45	57	193	76	73	61	84	58
ENSG00000070882	OSBPL3	protein_coding	3889	3891	7909	7253	18264	7364	8980	9251	7713	6898
ENSG00000070886	EPHA8	protein_coding	81	78	113	74	188	80	50	45	100	92
ENSG00000070915	SLC12A3	protein_coding	3	4	13	4	82	35	5	15	3	8
ENSG00000070950	RAD18	protein_coding	3538	3432	2815	2960	8961	3907	3093	3023	3886	3481
ENSG00000070961	ATP2B1	protein_coding	14244	13065	8167	8522	36189	14947	10442	10388	11814	10392
ENSG00000070985	TRPM5	protein_coding	0	0	2	0	1	0	0	1	0	1
ENSG00000071051	NCK2	protein_coding	8029	7858	7097	6930	15088	6495	6432	6612	11296	11070
ENSG00000071054	MAP4K4	protein_coding	43427	42320	28528	31342	82830	37126	38932	37576	52966	45825
ENSG00000071073	MGAT4A	protein_coding	245	243	1137	1182	1540	584	254	226	517	441
ENSG00000071082	RPL31	protein_coding	20728	18581	16225	17879	39872	17008	12219	14750	23362	19832
ENSG00000071127	WDR1	protein_coding	32281	30339	18902	19550	62332	30183	20636	22485	35071	32435
ENSG00000071189	SNX13	protein_coding	5711	5244	4815	5160	11275	4510	4419	4300	7898	6955
ENSG00000071203	MS4A12	protein_coding	5	0	12	7	17	3	4	4	0	0
ENSG00000071205	ARHGAP10	protein_coding	1594	1632	1722	1741	2748	1178	876	986	2664	2418
ENSG00000071242	RPS6KA2	protein_coding	278	273	1139	1157	2396	1010	627	636	742	759
ENSG00000071243	ING3	protein_coding	1011	1014	611	636	1899	869	871	851	1601	1441
ENSG00000071246	VASH1	protein_coding	1113	1195	2660	2793	6203	2310	1428	1478	1286	1218
ENSG00000071282	LMCD1	protein_coding	1359	1454	4216	4389	11140	5424	1889	1886	1501	1467
ENSG00000071462	BUD23	protein_coding	11783	11623	9332	9127	23647	10475	8499	9311	10765	10156
ENSG00000071537	SEL1L	protein_coding	25672	23834	20564	21610	61565	25390	21391	20450	27328	23795
ENSG00000071539	TRIP13	protein_coding	7800	7470	7373	7650	18532	8476	5866	6161	11405	10598
ENSG00000071553	ATP6AP1	protein_coding	8345	8439	11393	10917	27782	10713	9071	8825	8083	7968
ENSG00000071564	TCF3	protein_coding	16749	17430	10842	10425	25394	10567	10142	10197	21307	21063
ENSG00000071575	TRIB2	protein_coding	12566	11721	3429	3354	10519	4221	4289	3641	5855	5803
ENSG00000071626	DAZAP1	protein_coding	20311	19916	13017	11966	32894	14749	13769	14471	25727	23221
ENSG00000071655	MBD3	protein_coding	4460	4383	4076	3843	10947	4113	3031	3372	5293	5102
ENSG00000071677	PRLH	protein_coding	0	0	0	0	0	0	1	0	0	0
ENSG00000071794	HLTF	protein_coding	5287	4584	5982	6415	11894	4896	4778	4633	6769	6179
ENSG00000071859	FAM50A	protein_coding	6045	5837	7563	7087	16965	7511	6111	6461	7382	6783
ENSG00000071889	FAM3A	protein_coding	1214	1103	2323	2221	5012	2076	1358	1435	1618	1678
ENSG00000071894	CPSF1	protein_coding	15504	15470	16535	16256	43456	16650	17361	17760	23277	23263
ENSG00000071909	MYO3B	protein_coding	6	9	16	23	52	22	22	15	6	4
ENSG00000071967	CYBRD1	protein_coding	3539	3326	7076	6782	15077	6044	4453	4282	3677	3183
ENSG00000071991	CDH19	protein_coding	12	18	0	0	26	11	36	23	2	1
ENSG00000071994	PDCD2	protein_coding	9704	9051	7209	6867	15052	6644	5243	5503	9582	9021
ENSG00000072041	SLC6A15	protein_coding	1511	1430	1764	1763	5664	2398	1863	1903	962	765
ENSG00000072042	RDH11	protein_coding	10477	9504	15601	15141	30914	13159	15273	15012	14352	11816
ENSG00000072062	PRKACA	protein_coding	5475	5796	5606	5574	12679	5486	4348	4217	6594	6422
ENSG00000072071	ADGRL1	protein_coding	3907	4025	4782	4778	11779	4116	4115	3995	5487	5353
ENSG00000072080	SPP2	protein_coding	2	2	3	2	4	2	0	0	0	1
ENSG00000072110	ACTN1	protein_coding	84114	84907	53154	54829	191481	83842	74012	74476	107107	102795
ENSG00000072121	ZFYVE26	protein_coding	4962	4881	5040	5744	12281	5077	5404	5559	4291	4173
ENSG00000072133	RPS6KA6	protein_coding	1172	1103	1527	1527	5227	2400	1403	1254	933	831
ENSG00000072134	EPN2	protein_coding	4207	4199	4109	4136	15611	7585	3816	4033	5913	5853
ENSG00000072135	PTPN18	protein_coding	4101	4152	7177	7404	11723	5144	4125	4173	4259	4322
ENSG00000072163	LIMS2	protein_coding	372	377	1348	1162	2675	1010	539	602	803	850
ENSG00000072182	ASIC4	protein_coding	18	11	31	24	110	31	28	16	27	12
ENSG00000072195	SPEG	protein_coding	3839	3921	12263	11419	26195	9753	7824	8928	9152	9193
ENSG00000072201	LNX1	protein_coding	280	292	749	724	884	404	222	232	334	358
ENSG00000072210	ALDH3A2	protein_coding	4243	4026	3607	3928	9130	3891	3090	3151	2910	2803
ENSG00000072274	TFRC	protein_coding	103879	93841	49183	52493	148749	62036	51758	51247	72379	61953
ENSG00000072310	SREBF1	protein_coding	6926	6430	9998	9615	20397	7514	8357	7669	8607	9335
ENSG00000072315	TRPC5	protein_coding	0	0	0	1	1	0	1	1	1	0
ENSG00000072364	AFF4	protein_coding	37563	36553	19659	21978	63028	27537	25219	24170	28135	26364
ENSG00000072401	UBE2D1	protein_coding	4349	4152	2936	3048	7596	3442	2863	2925	4685	4087
ENSG00000072415	MPP5	protein_coding	13724	12720	12991	14008	20603	8850	10505	10487	28043	24932
ENSG00000072422	RHOBTB1	protein_coding	2122	1882	4320	4338	9053	4091	2704	2469	3145	2763
ENSG00000072501	SMC1A	protein_coding	21373	20468	24009	27234	68024	29837	23935	23118	33035	29791
ENSG00000072506	HSD17B10	protein_coding	6927	6210	5354	5194	12301	5442	4102	4394	6785	6772
ENSG00000072518	MARK2	protein_coding	4265	4456	2789	2980	9037	3654	3228	3331	5589	5713
ENSG00000072571	HMMR	protein_coding	6558	6233	5531	5609	15952	6918	9720	8380	20270	17246
ENSG00000072609	CHFR	protein_coding	943	859	929	875	2712	1107	1068	1050	812	839
ENSG00000072657	TRHDE	protein_coding	861	787	1094	936	2914	1113	1052	952	917	848
ENSG00000072682	P4HA2	protein_coding	5246	4711	10094	9553	27942	11852	10316	10390	5093	4556
ENSG00000072694	FCGR2B	protein_coding	2	3	1	4	5	6	3	5	3	0
ENSG00000072736	NFATC3	protein_coding	3624	3617	2850	3016	6284	2784	3107	3278	4657	3983
ENSG00000072756	TRNT1	protein_coding	4690	4180	2938	2747	7755	3479	3508	3651	4588	3948
ENSG00000072778	ACADVL	protein_coding	16910	15908	17442	15427	45413	19609	18088	19749	18509	18170
ENSG00000072786	STK10	protein_coding	8179	8046	4649	5056	18306	7806	5783	6020	8878	8613
ENSG00000072803	FBXW11	protein_coding	6742	6396	5681	6089	13921	6126	5470	5207	9760	9009
ENSG00000072818	ACAP1	protein_coding	160	145	247	236	731	261	136	191	106	133
ENSG00000072832	CRMP1	protein_coding	6654	6471	5736	5941	15460	6577	4081	4238	5846	6164
ENSG00000072840	EVC	protein_coding	1138	1287	1566	1837	4763	1908	1711	1838	1978	1615
ENSG00000072849	DERL2	protein_coding	3517	3146	3024	2906	9281	3650	2904	2971	2889	2690
ENSG00000072858	SIDT1	protein_coding	11	20	11	15	34	21	11	15	1	3
ENSG00000072864	NDE1	protein_coding	3324	3178	2593	2757	7188	3027	5508	5352	12203	11483
ENSG00000072952	MRVI1	protein_coding	2	3	2	5	18	6	9	7	0	4
ENSG00000072954	TMEM38A	protein_coding	641	668	1233	1210	2581	1085	613	579	469	417
ENSG00000072958	AP1M1	protein_coding	2902	3022	4292	4371	10279	4336	3526	3681	4711	4950
ENSG00000073008	PVR	protein_coding	10643	10542	11800	12356	38787	17039	15334	16431	12115	11477
ENSG00000073050	XRCC1	protein_coding	2974	2989	3160	3223	8050	3379	2995	3092	3995	4031
ENSG00000073060	SCARB1	protein_coding	10670	10277	10684	10396	30394	11633	11364	11795	8828	8870
ENSG00000073067	CYP2W1	protein_coding	0	0	0	0	3	0	1	2	0	1
ENSG00000073111	MCM2	protein_coding	18566	17702	12980	13508	28131	12359	7440	7902	12484	12210
ENSG00000073146	MOV10L1	protein_coding	63	59	617	511	676	265	285	329	101	81
ENSG00000073150	PANX2	protein_coding	702	662	824	770	2172	939	784	731	749	805
ENSG00000073169	SELENOO	protein_coding	1768	1676	2941	2632	6654	2448	2278	2312	1383	1652
ENSG00000073282	TP63	protein_coding	6	5	17	17	150	45	58	58	4	4
ENSG00000073331	ALPK1	protein_coding	554	451	1139	1213	1885	847	887	872	2364	2189
ENSG00000073350	LLGL2	protein_coding	38	42	217	193	238	100	48	56	87	105
ENSG00000073417	PDE8A	protein_coding	5684	5617	3532	3578	9612	4510	4087	3961	6190	5417
ENSG00000073464	CLCN4	protein_coding	1665	1580	1624	1790	3747	1423	1561	1597	1712	1727
ENSG00000073536	NLE1	protein_coding	3701	3638	2711	2563	6765	2840	2739	2847	4299	4355
ENSG00000073578	SDHA	protein_coding	8180	7862	12050	12456	25057	10972	7958	7777	8919	8243
ENSG00000073584	SMARCE1	protein_coding	602	467	647	581	1497	686	772	688	253	226
ENSG00000073598	FNDC8	protein_coding	4	2	1	3	10	2	3	5	0	0
ENSG00000073605	GSDMB	protein_coding	1124	1040	2420	1918	5571	1974	1975	1922	845	741
ENSG00000073614	KDM5A	protein_coding	9011	8311	5350	6093	13671	5944	7258	7144	5821	5093
ENSG00000073670	ADAM11	protein_coding	447	419	561	474	1123	515	436	474	583	705
ENSG00000073711	PPP2R3A	protein_coding	4006	4145	2715	2954	11244	4635	3979	3698	5986	5725
ENSG00000073712	FERMT2	protein_coding	15885	14849	11850	12504	37612	18084	12593	12532	19598	17412
ENSG00000073734	ABCB11	protein_coding	1	3	3	2	14	7	20	11	2	0
ENSG00000073737	DHRS9	protein_coding	18	24	10	11	30	11	12	17	1	5
ENSG00000073754	CD5L	protein_coding	0	0	2	4	14	3	7	11	2	2
ENSG00000073756	PTGS2	protein_coding	437	453	462	461	1248	715	158	185	72	61
ENSG00000073792	IGF2BP2	protein_coding	15725	16346	9801	10109	25382	11113	14196	13801	17505	15884
ENSG00000073803	MAP3K13	protein_coding	3155	3063	2185	2284	4470	2107	1533	1506	2435	2248
ENSG00000073849	ST6GAL1	protein_coding	383	446	692	732	1655	673	476	458	511	508
ENSG00000073861	TBX21	protein_coding	8	5	4	7	41	6	7	6	6	2
ENSG00000073905	VDAC1P1	processed_pseudogene	48	34	18	23	85	22	18	26	60	37
ENSG00000073910	FRY	protein_coding	75	63	308	355	1024	375	406	355	93	80
ENSG00000073921	PICALM	protein_coding	16649	16224	12048	12691	42795	20751	17334	18050	20275	18263
ENSG00000073969	NSF	protein_coding	2730	2817	3524	3492	8277	3586	3205	3177	4355	3852
ENSG00000074047	GLI2	protein_coding	2775	3259	6181	6052	18190	6863	7605	7330	7877	7495
ENSG00000074054	CLASP1	protein_coding	8613	8349	7975	8351	21527	8688	10163	9481	13475	12371
ENSG00000074071	MRPS34	protein_coding	15418	13505	9974	9509	23436	11863	9485	9706	15049	13415
ENSG00000074181	NOTCH3	protein_coding	2732	2658	8629	8759	23858	8379	5004	4717	3218	3447
ENSG00000074201	CLNS1A	protein_coding	14915	13535	9617	9941	24446	11373	9664	9592	15980	13976
ENSG00000074211	PPP2R2C	protein_coding	6632	6378	5376	5547	13953	6330	4564	4445	10368	9482
ENSG00000074219	TEAD2	protein_coding	1914	1976	3060	3156	6290	2375	2000	2035	2734	2648
ENSG00000074266	EED	protein_coding	2849	2574	2565	2563	6589	2803	2118	2204	1745	1687
ENSG00000074276	CDHR2	protein_coding	0	2	5	6	20	8	2	6	3	1
ENSG00000074317	SNCB	protein_coding	187	160	189	268	418	167	106	107	307	301
ENSG00000074319	TSG101	protein_coding	3574	3341	3277	3159	7805	3448	2406	2404	4621	4139
ENSG00000074356	NCBP3	protein_coding	4363	4176	4237	4470	12406	5457	5481	5232	6181	5814
ENSG00000074370	ATP2A3	protein_coding	81	80	503	485	1132	400	259	218	90	109
ENSG00000074410	CA12	protein_coding	1651	1604	2457	2448	7462	3246	3443	3347	2202	1893
ENSG00000074416	MGLL	protein_coding	4084	4089	4381	4727	13998	6255	4194	4640	5115	5278
ENSG00000074527	NTN4	protein_coding	1008	944	2433	2399	7309	3115	1869	1779	1192	1185
ENSG00000074582	BCS1L	protein_coding	2538	2457	2113	2044	5635	2288	1787	1959	2598	2655
ENSG00000074590	NUAK1	protein_coding	4872	4924	7342	7922	13713	5456	4571	4866	8817	8171
ENSG00000074603	DPP8	protein_coding	4977	4523	3726	3651	11558	5007	4291	4255	5523	5150
ENSG00000074621	SLC24A1	protein_coding	1408	1295	1451	1666	5505	2123	2038	1972	1749	1638
ENSG00000074657	ZNF532	protein_coding	12985	13264	7622	8181	24587	10536	9748	9254	14903	13494
ENSG00000074660	SCARF1	protein_coding	97	77	62	44	589	266	129	173	37	27
ENSG00000074695	LMAN1	protein_coding	31692	29542	21694	21816	60591	25033	22443	21479	26640	24022
ENSG00000074696	HACD3	protein_coding	20850	19349	24055	23422	56185	23266	23344	21533	20001	19057
ENSG00000074706	IPCEF1	protein_coding	3	2	14	13	24	13	6	13	9	6
ENSG00000074755	ZZEF1	protein_coding	3322	3144	2815	3166	7964	3135	3041	3107	4065	3906
ENSG00000074771	NOX3	protein_coding	0	0	2	1	4	3	1	0	2	2
ENSG00000074800	ENO1	protein_coding	317840	294381	177115	184702	450191	197847	144216	151765	308042	283790
ENSG00000074803	SLC12A1	protein_coding	0	0	0	1	0	0	2	1	1	1
ENSG00000074842	MYDGF	protein_coding	8940	7987	9078	8261	23358	9841	7419	8078	7732	7729
ENSG00000074855	ANO8	protein_coding	338	348	1542	1288	2038	835	649	686	569	645
ENSG00000074935	TUBE1	protein_coding	1708	1688	2087	1823	3773	1845	1475	1675	2567	2260
ENSG00000074964	ARHGEF10L	protein_coding	560	561	1694	1621	3231	1205	832	897	993	1054
ENSG00000074966	TXK	protein_coding	11	7	38	47	50	30	10	24	10	10
ENSG00000075035	WSCD2	protein_coding	3	1	7	4	44	14	12	13	2	2
ENSG00000075043	KCNQ2	protein_coding	16	25	32	31	135	63	37	29	16	14
ENSG00000075073	TACR2	protein_coding	3	2	7	7	19	14	15	17	3	4
ENSG00000075089	ACTR6	protein_coding	1368	1193	997	1056	2420	1094	1011	977	1451	1197
ENSG00000075131	TIPIN	protein_coding	4076	3524	1705	1727	4717	2253	1376	1474	2807	2573
ENSG00000075142	SRI	protein_coding	5640	5242	5346	4576	11229	4908	3091	3567	5754	5458
ENSG00000075151	EIF4G3	protein_coding	3602	3323	4010	4253	10733	4555	5875	5844	8149	7247
ENSG00000075188	NUP37	protein_coding	2525	2435	1575	1646	4001	1794	1618	1673	3940	3413
ENSG00000075213	SEMA3A	protein_coding	367	310	574	578	4772	1960	1600	1635	641	504
ENSG00000075218	GTSE1	protein_coding	8158	7646	10093	10762	24606	10259	19309	18892	32784	32105
ENSG00000075223	SEMA3C	protein_coding	6107	5569	5587	5427	22747	9219	14386	13565	9234	7944
ENSG00000075234	TTC38	protein_coding	1827	1771	1389	1414	2829	1156	1307	1237	2319	2202
ENSG00000075239	ACAT1	protein_coding	4732	4505	4668	4791	10137	4909	3229	3596	5569	4680
ENSG00000075240	GRAMD4	protein_coding	810	672	1146	1191	3529	1326	949	1004	1925	1938
ENSG00000075275	CELSR1	protein_coding	13	19	87	81	142	70	45	37	51	46
ENSG00000075290	WNT8B	protein_coding	0	0	2	1	3	5	5	4	0	2
ENSG00000075292	ZNF638	protein_coding	11443	10473	14721	15965	32477	12915	16517	15805	24387	21389
ENSG00000075303	SLC25A40	protein_coding	1051	1131	2215	2491	3945	1574	1286	1271	1973	1654
ENSG00000075336	TIMM21	protein_coding	6337	6186	4108	3875	9395	4324	4192	4372	6332	5471
ENSG00000075340	ADD2	protein_coding	671	750	824	1049	2558	1108	1441	1513	1123	978
ENSG00000075388	FGF4	protein_coding	13	6	11	20	77	31	16	9	1	3
ENSG00000075391	RASAL2	protein_coding	3631	3739	6361	6858	19382	7876	6901	6576	7629	6731
ENSG00000075399	VPS9D1	protein_coding	521	518	2234	1692	5471	2005	2116	2341	1461	1655
ENSG00000075407	ZNF37A	protein_coding	5190	4818	3664	4016	8696	3869	3782	3821	7957	7154
ENSG00000075413	MARK3	protein_coding	6256	6027	3850	3887	9677	4165	4906	4842	7638	6835
ENSG00000075415	SLC25A3	protein_coding	24587	22263	18832	19484	47123	20487	15464	16152	23750	23045
ENSG00000075420	FNDC3B	protein_coding	10921	11521	7728	8355	22444	10113	10996	10764	15998	13571
ENSG00000075426	FOSL2	protein_coding	44666	45387	19767	20182	67636	31483	16829	17419	19407	18772
ENSG00000075429	CACNG5	protein_coding	11	27	7	4	18	15	12	8	7	1
ENSG00000075461	CACNG4	protein_coding	0	0	0	0	0	0	0	0	0	0
ENSG00000075539	FRYL	protein_coding	8687	8133	8670	10066	19679	8230	9858	9528	13888	12088
ENSG00000075568	TMEM131	protein_coding	10289	10232	9950	10375	22936	8633	10146	9439	13700	11951
ENSG00000075618	FSCN1	protein_coding	68517	68026	44014	45149	157926	65696	43308	45445	53456	56411
ENSG00000075624	ACTB	protein_coding	442392	446545	305985	307122	909686	397582	262276	270525	538376	539557
ENSG00000075643	MOCOS	protein_coding	1001	879	2812	3037	5312	2367	953	1094	1478	1353
ENSG00000075651	PLD1	protein_coding	739	728	2447	2450	3297	1344	1408	1341	1829	1563
ENSG00000075673	ATP12A	protein_coding	5	7	9	6	17	2	4	2	10	6
ENSG00000075702	WDR62	protein_coding	3382	3257	6682	6149	13400	5025	6515	6658	9133	9209
ENSG00000075711	DLG1	protein_coding	11033	10512	7694	8082	17558	8000	9790	9018	16569	14465
ENSG00000075785	RAB7A	protein_coding	19597	19625	11157	11714	31605	14321	13262	12709	19058	17862
ENSG00000075790	BCAP29	protein_coding	4931	4366	5673	5577	13882	5890	4213	4047	5723	5073
ENSG00000075826	SEC31B	protein_coding	253	251	977	628	1380	442	714	755	402	398
ENSG00000075856	SART3	protein_coding	6328	6061	4361	4703	11060	5013	5357	5611	8860	8273
ENSG00000075884	ARHGAP15	protein_coding	12	21	6	5	13	4	16	17	27	21
ENSG00000075886	TUBA3D	protein_coding	69	56	45	23	77	67	46	24	127	95
ENSG00000075891	PAX2	protein_coding	56	60	305	269	462	153	132	107	36	53
ENSG00000075914	EXOSC7	protein_coding	2401	2273	1196	1257	3325	1453	1367	1432	2315	1970
ENSG00000075945	KIFAP3	protein_coding	700	664	1413	1535	4063	1725	1228	1297	628	572
ENSG00000075975	MKRN2	protein_coding	2654	2615	2560	2744	4859	2202	2235	2336	3932	3533
ENSG00000076003	MCM6	protein_coding	8968	8275	6866	7367	15160	6728	3653	3672	5693	5348
ENSG00000076043	REXO2	protein_coding	10650	9919	7260	8063	16681	7658	5904	6664	10247	8711
ENSG00000076053	RBM7	protein_coding	3071	2770	2112	2101	6240	3008	2878	2722	4189	3395
ENSG00000076067	RBMS2	protein_coding	5514	5595	9144	8948	19240	7869	9591	9952	7994	7072
ENSG00000076108	BAZ2A	protein_coding	18576	18272	11874	12939	33641	13760	15134	15212	23527	22347
ENSG00000076201	PTPN23	protein_coding	4292	4565	4769	4778	13007	4920	5912	5955	7207	7427
ENSG00000076242	MLH1	protein_coding	6040	6011	5080	5368	13888	6152	4662	4615	8181	6989
ENSG00000076248	UNG	protein_coding	8196	8014	4644	4666	9464	4210	2079	2184	4162	3856
ENSG00000076258	FMO4	protein_coding	69	55	133	130	350	171	88	85	58	43
ENSG00000076321	KLHL20	protein_coding	1737	1695	1866	1865	3904	1893	1873	1709	2208	2009
ENSG00000076344	RGS11	protein_coding	0	0	0	0	1	2	0	0	0	0
ENSG00000076351	SLC46A1	protein_coding	1224	1259	3871	3996	8857	3358	2614	2917	2495	2473
ENSG00000076356	PLXNA2	protein_coding	2665	2807	2678	3217	19117	7779	3540	4080	2538	2572
ENSG00000076382	SPAG5	protein_coding	12942	12069	10080	10858	24454	11011	13558	13768	30463	27522
ENSG00000076513	ANKRD13A	protein_coding	3643	3721	2281	2462	14719	7027	5655	5828	4839	4544
ENSG00000076554	TPD52	protein_coding	3709	3593	3441	3357	8226	3853	2474	2357	3833	3422
ENSG00000076555	ACACB	protein_coding	301	295	653	747	966	391	317	292	234	196
ENSG00000076604	TRAF4	protein_coding	7411	7144	7142	6706	18776	8342	5065	5420	4541	4810
ENSG00000076641	PAG1	protein_coding	508	491	765	779	1871	743	601	599	202	204
ENSG00000076650	GPATCH1	protein_coding	1252	1213	1442	1405	2878	1248	1259	1278	2028	1820
ENSG00000076662	ICAM3	protein_coding	282	275	212	213	502	258	210	254	292	207
ENSG00000076685	NT5C2	protein_coding	4072	3772	5134	4921	10748	4805	4620	4599	7372	6861
ENSG00000076706	MCAM	protein_coding	11852	11820	37360	36742	104833	45618	38566	40986	11862	11585
ENSG00000076716	GPC4	protein_coding	1352	1283	4374	4408	10313	3815	3270	3022	1897	1686
ENSG00000076770	MBNL3	protein_coding	285	232	340	359	836	336	250	234	238	201
ENSG00000076826	CAMSAP3	protein_coding	168	191	350	315	604	214	272	236	460	452
ENSG00000076864	RAP1GAP	protein_coding	325	324	477	484	1414	667	436	437	423	456
ENSG00000076924	XAB2	protein_coding	4211	4046	3619	3658	9778	4104	3685	3796	5352	5163
ENSG00000076928	ARHGEF1	protein_coding	5078	4592	6192	5835	16937	7002	5516	5909	8120	8614
ENSG00000076944	STXBP2	protein_coding	405	347	615	474	1252	492	435	526	485	514
ENSG00000076984	MAP2K7	protein_coding	3446	3466	3147	3085	9206	3723	3849	4206	5086	5177
ENSG00000077009	NMRK2	protein_coding	1	0	0	0	5	4	2	0	0	1
ENSG00000077044	DGKD	protein_coding	21768	21547	11219	11595	41048	19938	9801	10320	11854	11980
ENSG00000077063	CTTNBP2	protein_coding	289	277	410	491	1223	561	189	188	218	158
ENSG00000077080	ACTL6B	protein_coding	0	1	0	1	1	0	0	0	0	0
ENSG00000077092	RARB	protein_coding	29	32	143	175	268	117	44	63	15	8
ENSG00000077097	TOP2B	protein_coding	17621	15737	14053	15467	35261	14909	11317	10860	18818	16474
ENSG00000077147	TM9SF3	protein_coding	36406	33485	21996	21455	68514	29124	28008	27925	33128	29110
ENSG00000077150	NFKB2	protein_coding	7968	8056	6660	6353	32219	15678	7453	8336	7408	7171
ENSG00000077152	UBE2T	protein_coding	1809	1844	3949	3983	8905	4202	2922	3028	3868	3666
ENSG00000077157	PPP1R12B	protein_coding	1769	1730	1525	1614	2991	1255	1754	1636	1204	1232
ENSG00000077232	DNAJC10	protein_coding	25440	23657	22774	23281	67336	28297	23578	23093	25454	22055
ENSG00000077235	GTF3C1	protein_coding	13579	12907	10627	11633	28374	11055	12583	12246	16841	15860
ENSG00000077238	IL4R	protein_coding	2823	2931	2791	2693	15938	6883	3066	3378	2710	2796
ENSG00000077254	USP33	protein_coding	5656	5078	5289	5644	11131	4662	5041	5070	7755	6882
ENSG00000077264	PAK3	protein_coding	515	473	1033	1022	2749	1203	916	978	992	913
ENSG00000077274	CAPN6	protein_coding	77	62	256	236	478	201	178	158	79	62
ENSG00000077279	DCX	protein_coding	1	3	9	10	18	8	9	10	1	6
ENSG00000077312	SNRPA	protein_coding	10288	10637	7882	7351	17118	7289	5228	5416	9750	9300
ENSG00000077327	SPAG6	protein_coding	0	0	0	1	1	0	0	0	0	0
ENSG00000077348	EXOSC5	protein_coding	2022	2050	1328	1317	3197	1336	884	766	1387	1405
ENSG00000077380	DYNC1I2	protein_coding	16948	15283	10137	10815	26160	11774	9764	10640	16909	15169
ENSG00000077420	APBB1IP	protein_coding	8	3	3	1	5	0	2	1	1	4
ENSG00000077454	LRCH4	protein_coding	611	663	1008	1113	2631	1051	928	1038	1693	1732
ENSG00000077458	FAM76B	protein_coding	2012	1834	1763	1689	4320	1989	1816	1846	1981	1735
ENSG00000077463	SIRT6	protein_coding	1273	1331	1398	1289	3700	1492	1325	1323	1174	1211
ENSG00000077498	TYR	protein_coding	0	0	0	1	0	0	0	0	0	0
ENSG00000077514	POLD3	protein_coding	2360	2341	4384	4494	7850	3481	2477	2385	2278	2128
ENSG00000077522	ACTN2	protein_coding	110	92	95	88	364	129	76	97	102	91
ENSG00000077549	CAPZB	protein_coding	12121	11691	8423	8419	21069	8506	6825	7107	13278	13316
ENSG00000077585	GPR137B	protein_coding	2580	2621	1750	1730	5447	2214	1896	1630	1319	1173
ENSG00000077616	NAALAD2	protein_coding	269	236	816	798	1503	549	535	447	292	266
ENSG00000077684	JADE1	protein_coding	4444	4292	5206	5529	16275	6633	5741	5828	8449	7404
ENSG00000077713	SLC25A43	protein_coding	1120	1030	931	1001	2516	1109	733	792	1744	1528
ENSG00000077721	UBE2A	protein_coding	2879	2905	4324	4424	11408	4706	3828	3825	2466	2234
ENSG00000077782	FGFR1	protein_coding	10653	10376	8793	8760	26477	10584	8670	8449	7266	7147
ENSG00000077800	FKBP6	protein_coding	3	3	4	8	7	4	2	5	0	0
ENSG00000077935	SMC1B	protein_coding	0	0	0	0	0	0	0	0	0	0
ENSG00000077942	FBLN1	protein_coding	8431	7581	14293	13667	36136	14309	11565	10785	8615	8512
ENSG00000077943	ITGA8	protein_coding	7	8	8	17	104	23	40	15	3	4
ENSG00000077984	CST7	protein_coding	102	79	208	236	710	265	190	195	93	94
ENSG00000078018	MAP2	protein_coding	293	272	1475	1726	5357	2395	1410	1341	749	699
ENSG00000078043	PIAS2	protein_coding	2732	2596	2111	2089	4538	2041	1896	1738	3027	2844
ENSG00000078053	AMPH	protein_coding	1657	1583	4254	4562	5885	2497	1407	1382	2593	2341
ENSG00000078061	ARAF	protein_coding	5041	5064	5581	5247	13541	5397	5102	4966	7201	7090
ENSG00000078070	MCCC1	protein_coding	1735	1674	1868	1955	4035	1684	1431	1327	1958	1770
ENSG00000078081	LAMP3	protein_coding	158	143	597	594	1532	627	432	411	155	133
ENSG00000078098	FAP	protein_coding	262	257	1055	1032	3220	1224	1771	1619	303	208
ENSG00000078114	NEBL	protein_coding	265	254	414	429	1204	478	479	394	211	179
ENSG00000078124	ACER3	protein_coding	2418	2407	3156	3081	7605	2919	2606	2477	2605	2415
ENSG00000078140	UBE2K	protein_coding	13460	12825	7538	7934	20591	9163	7301	7794	14519	12466
ENSG00000078142	PIK3C3	protein_coding	3191	2923	1810	1878	5438	2191	2156	2013	2068	1864
ENSG00000078177	N4BP2	protein_coding	4669	4213	4967	5363	14560	6219	6518	6307	5619	5354
ENSG00000078237	TIGAR	protein_coding	555	564	360	409	823	351	313	351	268	273
ENSG00000078246	TULP3	protein_coding	3090	2988	6829	7037	9566	4177	3784	3448	6263	5878
ENSG00000078269	SYNJ2	protein_coding	6776	6888	6986	7601	31767	14250	6412	6584	10461	10278
ENSG00000078295	ADCY2	protein_coding	128	152	325	281	1326	517	361	312	160	145
ENSG00000078304	PPP2R5C	protein_coding	8925	8388	6074	6458	14771	6309	6790	6417	12171	10824
ENSG00000078319	PMS2P1	unprocessed_pseudogene	1178	1093	1123	1196	2378	1056	682	734	1623	1677
ENSG00000078328	RBFOX1	protein_coding	75	81	257	269	579	208	171	170	174	128
ENSG00000078369	GNB1	protein_coding	36443	35751	18069	18142	48439	22288	19456	19495	38542	35331
ENSG00000078399	HOXA9	protein_coding	1295	1252	861	881	1335	634	482	503	943	797
ENSG00000078401	EDN1	protein_coding	2014	2132	1614	1417	5036	2384	2137	2472	715	752
ENSG00000078403	MLLT10	protein_coding	4198	4134	3145	2995	7763	3365	4736	4638	9203	7828
ENSG00000078487	ZCWPW1	protein_coding	329	275	377	344	965	366	322	336	442	382
ENSG00000078549	ADCYAP1R1	protein_coding	242	265	325	324	873	375	162	221	222	183
ENSG00000078579	FGF20	protein_coding	3	5	15	5	37	9	2	2	5	1
ENSG00000078589	P2RY10	protein_coding	0	0	0	0	0	0	0	0	0	0
ENSG00000078596	ITM2A	protein_coding	3	2	4	4	10	3	5	4	1	0
ENSG00000078618	NRDC	protein_coding	23567	21965	13239	14056	32179	13785	13540	13302	28757	25848
ENSG00000078668	VDAC3	protein_coding	11041	10124	8982	9197	19251	8367	5710	5989	12955	11871
ENSG00000078674	PCM1	protein_coding	11787	10540	8528	9739	20270	8805	9506	8836	16455	14364
ENSG00000078687	TNRC6C	protein_coding	947	953	1093	1136	2493	986	1047	1067	1863	1790
ENSG00000078699	CBFA2T2	protein_coding	1652	1617	2455	2624	4772	1825	2459	2464	2592	2498
ENSG00000078725	BRINP1	protein_coding	727	653	775	783	1663	673	373	360	162	157
ENSG00000078747	ITCH	protein_coding	8037	7536	5751	6119	15396	6899	7131	6833	9985	8984
ENSG00000078795	PKD2L2	protein_coding	14	18	32	25	46	8	3	17	11	5
ENSG00000078804	TP53INP2	protein_coding	1685	1770	4247	4342	10464	3771	2551	2298	1155	1163
ENSG00000078808	SDF4	protein_coding	16792	15499	14407	13764	39984	16687	13994	14200	13744	13266
ENSG00000078814	MYH7B	protein_coding	20	21	30	37	112	39	52	44	63	31
ENSG00000078898	BPIFB2	protein_coding	0	0	0	0	1	0	0	0	0	0
ENSG00000078900	TP73	protein_coding	309	319	1908	2020	3397	1357	386	380	283	291
ENSG00000078902	TOLLIP	protein_coding	2106	1997	2201	2080	5762	2212	1780	1707	2294	2299
ENSG00000078967	UBE2D4	protein_coding	1591	1581	2345	2542	4499	1988	1213	1297	2313	2119
ENSG00000079101	CLUL1	protein_coding	7	2	12	12	24	11	6	5	3	3
ENSG00000079102	RUNX1T1	protein_coding	15	13	55	36	57	20	16	16	4	11
ENSG00000079112	CDH17	protein_coding	0	1	0	0	0	0	0	1	0	0
ENSG00000079134	THOC1	protein_coding	4795	4461	3563	3415	8815	3840	4089	3842	5596	4980
ENSG00000079150	FKBP7	protein_coding	837	718	734	768	2294	853	672	675	635	521
ENSG00000079156	OSBPL6	protein_coding	1473	1551	2402	2438	5106	2055	1197	1245	1712	1550
ENSG00000079215	SLC1A3	protein_coding	4074	3852	3287	3069	7356	2674	3443	2945	2371	1929
ENSG00000079246	XRCC5	protein_coding	58642	52709	35531	37602	94381	42021	34534	35442	57311	49994
ENSG00000079257	LXN	protein_coding	0	0	0	0	2	0	0	1	1	0
ENSG00000079263	SP140	protein_coding	790	782	620	609	2536	1192	1237	1212	534	438
ENSG00000079277	MKNK1	protein_coding	200	218	112	85	772	278	171	152	122	110
ENSG00000079308	TNS1	protein_coding	12188	12914	11395	12844	44688	17947	12826	13886	9544	9334
ENSG00000079313	REXO1	protein_coding	1955	2041	2816	2729	7794	3143	2963	3096	6183	6662
ENSG00000079332	SAR1A	protein_coding	19482	17960	11087	11380	34082	16245	13261	13492	19049	16076
ENSG00000079335	CDC14A	protein_coding	1807	1772	1330	1245	2880	1286	1397	1357	1220	1004
ENSG00000079337	RAPGEF3	protein_coding	254	250	550	483	1096	463	364	483	228	228
ENSG00000079385	CEACAM1	protein_coding	14	17	162	177	360	130	140	147	4	2
ENSG00000079387	SENP1	protein_coding	3975	4011	4306	4452	9835	4490	4290	4188	3976	3530
ENSG00000079393	DUSP13	protein_coding	1	1	1	3	14	15	4	6	1	0
ENSG00000079432	CIC	protein_coding	7580	7814	10663	11031	23526	9007	8374	8474	13104	13506
ENSG00000079435	LIPE	protein_coding	588	634	369	418	1212	508	647	621	1778	1670
ENSG00000079459	FDFT1	protein_coding	12948	12542	15661	16311	36857	15652	16997	15746	23169	21391
ENSG00000079462	PAFAH1B3	protein_coding	3249	2901	3351	3292	7409	3266	2197	2182	3333	3381
ENSG00000079482	OPHN1	protein_coding	656	681	1507	1618	2761	1186	1320	1496	1639	1558
ENSG00000079557	AFM	protein_coding	0	0	0	2	6	2	1	2	2	1
ENSG00000079616	KIF22	protein_coding	6768	6348	7473	7149	20105	9351	10340	10453	15767	14848
ENSG00000079689	SCGN	protein_coding	0	0	0	0	0	1	0	0	0	0
ENSG00000079691	CARMIL1	protein_coding	1047	980	1565	1739	5477	2416	1258	1261	1478	1413
ENSG00000079739	PGM1	protein_coding	2888	2781	5758	5871	13129	5578	3672	3620	3746	3504
ENSG00000079785	DDX1	protein_coding	25998	23489	13317	13852	35821	16067	14423	14845	25298	22568
ENSG00000079805	DNM2	protein_coding	10079	9669	6117	6196	15531	6669	7145	6969	13427	13310
ENSG00000079819	EPB41L2	protein_coding	41925	41383	25368	26881	66265	31202	32193	32358	50204	43305
ENSG00000079841	RIMS1	protein_coding	60	63	85	100	339	148	78	80	90	88
ENSG00000079931	MOXD1	protein_coding	2115	1861	4249	4084	10571	4468	3173	3110	2332	2195
ENSG00000079950	STX7	protein_coding	3419	3011	3485	3323	6840	3100	2782	2853	4041	3481
ENSG00000079974	RABL2B	protein_coding	2492	2658	2922	2755	7262	2996	2722	2893	3002	2975
ENSG00000079999	KEAP1	protein_coding	4055	3677	5047	5149	12279	5407	3935	4117	5901	5797
ENSG00000080007	DDX43	protein_coding	2354	2198	1230	1196	4143	1968	1388	1372	1930	1806
ENSG00000080031	PTPRH	protein_coding	288	270	704	783	1129	594	305	296	321	372
ENSG00000080166	DCT	protein_coding	12	6	4	12	86	54	84	94	0	1
ENSG00000080189	SLC35C2	protein_coding	5465	5149	5948	5564	15276	6513	4973	5285	6825	6469
ENSG00000080200	CRYBG3	protein_coding	5372	4999	6415	7418	16670	7149	5456	5324	6449	5759
ENSG00000080224	EPHA6	protein_coding	168	156	398	439	971	470	304	298	224	206
ENSG00000080293	SCTR	protein_coding	0	1	0	4	1	3	1	4	1	0
ENSG00000080298	RFX3	protein_coding	634	626	1051	1029	2793	1001	857	740	1481	1397
ENSG00000080345	RIF1	protein_coding	17212	15321	9037	10148	32364	13637	13329	12986	11914	10053
ENSG00000080371	RAB21	protein_coding	4438	4485	2914	2891	9437	4122	3848	4054	4538	3971
ENSG00000080493	SLC4A4	protein_coding	137	131	734	793	1858	778	527	527	57	43
ENSG00000080503	SMARCA2	protein_coding	3638	3458	6603	6927	14233	5851	4376	4186	3288	2793
ENSG00000080511	RDH8	protein_coding	14	26	4	0	124	59	26	32	1	1
ENSG00000080546	SESN1	protein_coding	1717	1639	1925	1938	2410	934	1070	1081	815	729
ENSG00000080561	MID2	protein_coding	221	254	356	383	792	309	243	318	310	353
ENSG00000080572	PIH1D3	protein_coding	1	0	1	1	0	2	0	2	1	0
ENSG00000080573	COL5A3	protein_coding	2554	2369	2640	2826	10605	4653	3596	4237	1560	1786
ENSG00000080603	SRCAP	protein_coding	985	966	367	513	2072	784	653	763	780	809
ENSG00000080608	PUM3	protein_coding	6980	6521	3565	3831	11168	5348	6148	6314	9037	7539
ENSG00000080618	CPB2	protein_coding	0	0	0	0	0	1	0	2	0	0
ENSG00000080644	CHRNA3	protein_coding	183	207	513	490	1125	403	336	321	104	88
ENSG00000080709	KCNN2	protein_coding	125	126	104	90	179	60	70	60	63	65
ENSG00000080802	CNOT4	protein_coding	2436	2604	1696	1704	3756	1541	2665	2550	3369	2642
ENSG00000080815	PSEN1	protein_coding	10408	9340	7172	7209	21361	8678	8906	8797	8682	7933
ENSG00000080819	CPOX	protein_coding	5408	4952	5212	5081	10568	4621	5359	5703	7165	6974
ENSG00000080822	CLDND1	protein_coding	7284	7267	7736	7310	23395	10682	7830	7378	7201	6429
ENSG00000080823	MOK	protein_coding	1765	1629	1734	1618	5916	2514	2419	2781	1535	1487
ENSG00000080824	HSP90AA1	protein_coding	290419	257127	106048	112055	324846	148882	146506	149255	326183	274868
ENSG00000080839	RBL1	protein_coding	2836	2678	2948	3305	8762	3700	3139	2931	1318	1219
ENSG00000080845	DLGAP4	protein_coding	5666	6213	11129	10820	38226	15861	11317	11132	12732	11839
ENSG00000080854	IGSF9B	protein_coding	519	525	588	703	2204	738	613	662	597	577
ENSG00000080910	CFHR2	protein_coding	0	0	0	0	0	0	1	0	0	0
ENSG00000080947	CROCCP3	transcribed_unprocessed_pseudogene	263	218	562	479	1022	298	411	460	217	191
ENSG00000080986	NDC80	protein_coding	6157	5134	10427	10548	19450	8998	17105	16089	29255	25070
ENSG00000081014	AP4E1	protein_coding	2149	1974	2039	1820	4832	2085	1890	1883	2034	1930
ENSG00000081019	RSBN1	protein_coding	1787	1723	1713	1860	4958	1938	2897	2673	3015	2555
ENSG00000081026	MAGI3	protein_coding	2943	2804	3114	3375	5169	2162	2301	2122	3744	3438
ENSG00000081041	CXCL2	protein_coding	1	1	0	0	0	1	1	0	0	0
ENSG00000081051	AFP	protein_coding	388	324	365	336	835	417	337	314	422	326
ENSG00000081052	COL4A4	protein_coding	586	562	2923	3154	5907	2319	1424	1537	780	787
ENSG00000081059	TCF7	protein_coding	15	19	11	28	164	83	27	29	2	2
ENSG00000081087	OSTM1	protein_coding	2248	2206	2302	2193	6151	2588	2048	1921	2085	1835
ENSG00000081138	CDH7	protein_coding	13	13	33	26	106	34	26	27	2	11
ENSG00000081148	IMPG2	protein_coding	18	25	60	55	97	45	62	62	32	21
ENSG00000081154	PCNP	protein_coding	20075	19066	11923	12251	29468	13186	10008	10026	19846	17510
ENSG00000081177	EXD2	protein_coding	2148	2237	1991	1933	3632	1364	1479	1389	3339	2999
ENSG00000081181	ARG2	protein_coding	2650	2320	3030	2905	5409	2366	1260	1282	2326	2100
ENSG00000081189	MEF2C	protein_coding	275	264	164	141	418	253	71	78	142	111
ENSG00000081237	PTPRC	protein_coding	23	35	46	25	163	49	57	86	47	41
ENSG00000081248	CACNA1S	protein_coding	0	0	4	0	7	1	2	0	0	0
ENSG00000081277	PKP1	protein_coding	0	0	0	0	8	4	2	3	0	0
ENSG00000081307	UBA5	protein_coding	6002	5701	3824	3906	10143	4312	3865	3930	5264	4717
ENSG00000081320	STK17B	protein_coding	2159	1903	2068	1855	6142	2748	4449	4343	2507	2340
ENSG00000081377	CDC14B	protein_coding	2378	2289	1857	1884	5285	2299	1675	1615	2789	2487
ENSG00000081386	ZNF510	protein_coding	1767	1633	1607	1645	3778	1630	1756	1713	2655	2362
ENSG00000081479	LRP2	protein_coding	20	17	19	13	21	14	10	15	3	4
ENSG00000081665	ZNF506	protein_coding	0	0	0	0	1	0	0	0	0	0
ENSG00000081692	JMJD4	protein_coding	1075	1003	1119	1110	3249	1239	997	1036	1488	1611
ENSG00000081721	DUSP12	protein_coding	3155	3054	2091	1870	5453	2469	2306	2343	3462	3045
ENSG00000081760	AACS	protein_coding	4904	4637	4188	4185	13162	5287	4880	5244	4221	4129
ENSG00000081791	DELE1	protein_coding	3323	3274	4190	3993	10505	4430	4740	4757	5400	5181
ENSG00000081800	SLC13A1	protein_coding	0	1	0	0	0	0	0	0	0	0
ENSG00000081803	CADPS2	protein_coding	226	207	710	774	1448	555	330	318	418	400
ENSG00000081818	PCDHB4	protein_coding	40	43	79	73	141	50	39	35	49	49
ENSG00000081842	PCDHA6	protein_coding	819	773	718	657	1622	625	817	791	1082	1069
ENSG00000081853	PCDHGA2	protein_coding	91	105	83	79	155	74	72	52	93	75
ENSG00000081870	HSPB11	protein_coding	3127	2991	4274	4595	10246	3905	2665	2733	3429	2959
ENSG00000081913	PHLPP1	protein_coding	2065	2079	1410	1603	2220	941	721	737	946	893
ENSG00000081923	ATP8B1	protein_coding	636	655	962	890	863	435	430	418	1751	1698
ENSG00000081985	IL12RB2	protein_coding	1	0	0	1	0	0	0	1	0	0
ENSG00000082014	SMARCD3	protein_coding	779	809	867	753	2075	804	746	736	996	930
ENSG00000082068	WDR70	protein_coding	3496	3196	2422	2500	5725	2591	2775	2922	5386	4665
ENSG00000082074	FYB1	protein_coding	2	4	2	2	19	7	3	4	2	3
ENSG00000082126	MPP4	protein_coding	470	414	422	439	1444	610	674	699	422	381
ENSG00000082146	STRADB	protein_coding	1606	1585	2371	2424	4799	2043	1214	1182	2024	1902
ENSG00000082153	BZW1	protein_coding	41992	37975	19241	20410	67631	31797	24807	25476	37715	34487
ENSG00000082175	PGR	protein_coding	3	3	0	1	1	1	0	1	0	0
ENSG00000082196	C1QTNF3	protein_coding	26	24	70	62	144	40	59	58	57	45
ENSG00000082212	ME2	protein_coding	7311	7268	8489	9126	19502	8801	5324	4960	10172	9070
ENSG00000082213	C5orf22	protein_coding	3503	3594	3635	3758	5517	2592	3039	3004	4284	3857
ENSG00000082258	CCNT2	protein_coding	7815	7459	4767	4468	14737	6270	6957	6854	5352	4805
ENSG00000082269	FAM135A	protein_coding	1657	1694	2132	2149	4673	1970	1819	1783	2728	2516
ENSG00000082293	COL19A1	protein_coding	77	80	59	43	448	172	181	206	23	37
ENSG00000082397	EPB41L3	protein_coding	23691	24096	16806	17390	35377	16968	9624	9559	26029	22522
ENSG00000082438	COBLL1	protein_coding	1754	1688	3222	3536	5460	2513	1770	1851	1755	1563
ENSG00000082458	DLG3	protein_coding	897	918	1324	1329	5071	2435	1371	1416	1256	1188
ENSG00000082482	KCNK2	protein_coding	48	40	55	58	158	72	33	28	38	26
ENSG00000082497	SERTAD4	protein_coding	3031	2945	6146	6197	10131	4151	4459	4246	9630	8316
ENSG00000082512	TRAF5	protein_coding	1755	1643	3147	2861	6392	2659	2135	2224	1612	1533
ENSG00000082515	MRPL22	protein_coding	4219	3689	2490	2442	5620	2559	1961	2124	4233	3911
ENSG00000082516	GEMIN5	protein_coding	12464	12139	5596	6154	20645	9494	7904	8370	10266	8933
ENSG00000082556	OPRK1	protein_coding	15	21	72	70	62	25	25	15	36	56
ENSG00000082641	NFE2L1	protein_coding	46125	44321	36182	37576	107735	45558	42936	44758	46364	40876
ENSG00000082684	SEMA5B	protein_coding	0	2	11	8	55	6	13	18	5	2
ENSG00000082701	GSK3B	protein_coding	12943	13112	7941	8483	16898	7268	8331	8053	15223	13685
ENSG00000082781	ITGB5	protein_coding	32833	31215	29164	27956	91055	39537	33643	33669	30741	30420
ENSG00000082805	ERC1	protein_coding	7673	8005	10694	12119	26945	10932	11576	11118	14295	13287
ENSG00000082898	XPO1	protein_coding	60872	54558	27143	28632	74141	29513	39042	38855	53394	47000
ENSG00000082929	LINC01587	processed_transcript	0	0	1	0	2	0	0	0	0	0
ENSG00000082996	RNF13	protein_coding	2471	2299	1760	1830	3745	1493	1508	1473	2872	2610
ENSG00000083067	TRPM3	protein_coding	7	4	15	33	104	53	23	21	7	19
ENSG00000083093	PALB2	protein_coding	4032	3858	1898	2101	6346	2734	1910	1975	2287	2078
ENSG00000083097	DOP1A	protein_coding	407	353	852	894	2103	893	672	625	469	395
ENSG00000083099	LYRM2	protein_coding	3248	2958	2301	2456	5381	2404	2307	2284	3324	3055
ENSG00000083123	BCKDHB	protein_coding	507	504	841	813	1702	720	497	472	728	641
ENSG00000083168	KAT6A	protein_coding	9123	9100	5255	6096	16710	7456	8195	7907	8599	7296
ENSG00000083223	TUT7	protein_coding	6320	5812	3000	3477	8232	3705	4476	4374	4419	3943
ENSG00000083290	ULK2	protein_coding	168	193	645	704	1107	480	254	250	256	240
ENSG00000083307	GRHL2	protein_coding	0	0	0	2	0	0	0	1	0	1
ENSG00000083312	TNPO1	protein_coding	31408	29524	21212	23227	51458	23168	24720	25352	37570	33287
ENSG00000083444	PLOD1	protein_coding	27687	25781	26141	26214	71173	28293	25000	26064	26789	25955
ENSG00000083454	P2RX5	protein_coding	167	179	109	134	483	165	204	188	114	109
ENSG00000083457	ITGAE	protein_coding	1076	917	1027	875	2333	1028	767	898	1139	1025
ENSG00000083520	DIS3	protein_coding	9136	8560	3655	3975	11690	5364	4980	5042	6697	5815
ENSG00000083535	PIBF1	protein_coding	1689	1565	850	943	2213	1012	958	974	1958	1690
ENSG00000083544	TDRD3	protein_coding	670	635	681	652	1486	702	911	850	1445	1350
ENSG00000083622	AC000061.1	antisense	0	0	0	0	0	0	0	0	0	0
ENSG00000083635	NUFIP1	protein_coding	1634	1710	831	844	2417	1129	1105	1160	1933	1639
ENSG00000083642	PDS5B	protein_coding	7667	6778	4284	4708	9879	4092	5401	5082	10076	8679
ENSG00000083720	OXCT1	protein_coding	7976	7647	9923	10664	24470	11024	7040	7108	8417	7259
ENSG00000083750	RRAGB	protein_coding	1171	1010	802	699	1444	674	776	729	764	696
ENSG00000083782	EPYC	protein_coding	1	5	3	1	15	9	3	3	3	0
ENSG00000083799	CYLD	protein_coding	4823	4388	3382	3754	11617	5200	2789	2783	2370	2036
ENSG00000083807	SLC27A5	protein_coding	242	248	291	263	568	209	129	208	300	265
ENSG00000083812	ZNF324	protein_coding	918	875	489	508	1688	771	448	470	355	323
ENSG00000083814	ZNF671	protein_coding	505	459	464	429	747	324	428	532	258	270
ENSG00000083817	ZNF416	protein_coding	656	645	257	268	762	298	341	321	143	135
ENSG00000083828	ZNF586	protein_coding	580	608	457	482	745	308	439	430	584	515
ENSG00000083838	ZNF446	protein_coding	240	228	450	404	995	403	370	360	361	367
ENSG00000083844	ZNF264	protein_coding	2139	2045	1860	1807	4300	1631	1931	2047	780	803
ENSG00000083845	RPS5	protein_coding	26804	24125	24594	24524	58818	23677	15343	17211	25442	26339
ENSG00000083857	FAT1	protein_coding	27855	25843	23673	28922	66373	26136	28944	28631	36829	33582
ENSG00000083896	YTHDC1	protein_coding	15353	14572	8507	8691	20674	9299	10226	10415	16582	14819
ENSG00000083937	CHMP2B	protein_coding	5698	5289	4295	4222	11310	5377	4161	4085	4886	4282
ENSG00000084070	SMAP2	protein_coding	4397	4319	3550	3428	9316	4169	2811	2967	3213	3105
ENSG00000084072	PPIE	protein_coding	4298	3934	3336	3321	8332	3566	2813	2949	3815	3870
ENSG00000084073	ZMPSTE24	protein_coding	14215	13424	8419	8283	28691	11910	12623	11948	13860	11865
ENSG00000084090	STARD7	protein_coding	12492	11611	14547	14977	33420	14801	11576	11849	19674	17765
ENSG00000084092	NOA1	protein_coding	4447	4307	4044	4016	8352	3523	3442	3434	5759	5624
ENSG00000084093	REST	protein_coding	14364	12478	7350	7965	26021	11487	9035	9125	10304	9090
ENSG00000084110	HAL	protein_coding	6	4	28	33	58	24	30	28	8	8
ENSG00000084112	SSH1	protein_coding	3697	3921	7707	8480	22520	9558	5306	5420	7138	7188
ENSG00000084207	GSTP1	protein_coding	25285	22911	27260	27067	67163	29929	18093	19538	27093	28485
ENSG00000084234	APLP2	protein_coding	29440	27741	43013	43196	122672	53266	47063	45315	32419	28828
ENSG00000084444	FAM234B	protein_coding	795	750	1167	1122	3105	1154	876	1004	1027	1018
ENSG00000084453	SLCO1A2	protein_coding	62	40	204	172	235	115	85	86	39	29
ENSG00000084463	WBP11	protein_coding	23237	23584	14124	14867	35438	15482	16065	15743	29941	26610
ENSG00000084623	EIF3I	protein_coding	25888	25156	17472	17583	45423	19888	14780	15442	21390	22245
ENSG00000084628	NKAIN1	protein_coding	17	25	19	18	49	35	26	21	16	23
ENSG00000084636	COL16A1	protein_coding	7080	6506	14783	13334	39416	16194	14365	16163	7782	7509
ENSG00000084652	TXLNA	protein_coding	16523	16216	13922	14244	39423	16929	14603	15564	16924	16200
ENSG00000084674	APOB	protein_coding	5	4	9	8	35	12	5	11	1	1
ENSG00000084676	NCOA1	protein_coding	4353	4172	4637	4941	8487	3848	4285	3942	5722	5464
ENSG00000084693	AGBL5	protein_coding	5457	5877	6087	6461	13612	5500	4403	4548	6913	6750
ENSG00000084710	EFR3B	protein_coding	1504	1478	4381	4532	9678	4233	3146	3672	3087	3133
ENSG00000084731	KIF3C	protein_coding	4249	4268	7064	7665	14847	6469	4833	4484	6502	6432
ENSG00000084733	RAB10	protein_coding	11088	11230	10225	10807	28139	12658	12191	12084	10192	9167
ENSG00000084734	GCKR	protein_coding	2	2	0	2	23	8	3	4	2	0
ENSG00000084754	HADHA	protein_coding	26961	24821	21472	22140	54195	23415	19132	19086	26691	23801
ENSG00000084764	MAPRE3	protein_coding	679	710	2026	2015	5080	2180	1751	1833	1418	1420
ENSG00000084774	CAD	protein_coding	13487	13609	14723	16516	37882	14695	14076	14942	17397	18120
ENSG00000085063	CD59	protein_coding	12419	11655	9807	9637	41027	17341	13651	14676	7808	6504
ENSG00000085117	CD82	protein_coding	1992	1973	2674	2728	13191	5616	3894	4774	1001	946
ENSG00000085185	BCORL1	protein_coding	1696	1645	2097	2241	4458	1723	1708	1742	1517	1365
ENSG00000085224	ATRX	protein_coding	18208	17752	14172	15665	31368	14004	12399	11457	23888	21538
ENSG00000085231	AK6	protein_coding	1033	956	645	658	1751	748	806	891	2013	1451
ENSG00000085265	FCN1	protein_coding	0	1	0	0	3	0	0	1	0	0
ENSG00000085274	MYNN	protein_coding	2422	2402	1518	1520	4703	2226	2006	1997	2689	2404
ENSG00000085276	MECOM	protein_coding	2463	2391	1816	1920	5222	2260	1943	1736	2307	1944
ENSG00000085365	SCAMP1	protein_coding	4036	3748	4422	4454	11513	4592	4345	4006	4447	3913
ENSG00000085377	PREP	protein_coding	5273	5007	3007	3101	8226	3609	3821	3804	6015	5332
ENSG00000085382	HACE1	protein_coding	664	647	952	1000	1996	880	710	646	1005	909
ENSG00000085415	SEH1L	protein_coding	18190	17068	9008	9191	32352	14599	10923	11100	20724	18130
ENSG00000085433	WDR47	protein_coding	1543	1565	1557	1592	4613	1954	1843	1758	2205	1963
ENSG00000085449	WDFY1	protein_coding	9692	9155	6996	6922	18328	8275	10593	10506	12098	10675
ENSG00000085465	OVGP1	protein_coding	155	151	40	37	195	73	87	76	101	127
ENSG00000085491	SLC25A24	protein_coding	5863	5171	5218	5187	13315	6410	5353	5362	8713	7686
ENSG00000085511	MAP3K4	protein_coding	7354	7454	4131	4375	12772	5446	5510	5318	10682	9129
ENSG00000085514	PILRA	protein_coding	105	116	138	102	282	91	96	109	116	126
ENSG00000085552	IGSF9	protein_coding	716	788	1747	1554	2523	885	1139	1033	833	809
ENSG00000085563	ABCB1	protein_coding	4242	3968	3080	3368	11510	4793	2379	2351	2232	2086
ENSG00000085644	ZNF213	protein_coding	1670	1638	1112	1187	4041	1735	1335	1222	1290	1397
ENSG00000085662	AKR1B1	protein_coding	7178	7059	7942	8260	19091	8234	5152	5644	7973	7644
ENSG00000085719	CPNE3	protein_coding	9422	8705	10702	11178	26293	11127	7756	7831	10722	9465
ENSG00000085721	RRN3	protein_coding	6069	5394	3650	3619	9997	4587	4603	4696	7028	6328
ENSG00000085733	CTTN	protein_coding	22885	22379	19979	19451	58470	26791	25118	26933	28315	25504
ENSG00000085741	WNT11	protein_coding	28	24	247	301	393	120	73	56	29	51
ENSG00000085760	MTIF2	protein_coding	9040	8333	5351	5619	12107	5733	5273	5284	11068	9429
ENSG00000085788	DDHD2	protein_coding	3987	3838	3556	3807	8745	3935	3163	3223	4107	3718
ENSG00000085831	TTC39A	protein_coding	175	166	436	466	899	370	173	176	264	252
ENSG00000085832	EPS15	protein_coding	3864	4044	4865	5235	13105	5601	4254	4167	6198	5597
ENSG00000085840	ORC1	protein_coding	5074	4805	3557	3763	6852	2919	2396	2602	2866	2681
ENSG00000085871	MGST2	protein_coding	840	835	1483	1504	3488	1421	1149	1309	724	730
ENSG00000085872	CHERP	protein_coding	6272	6598	3685	3794	10540	4452	4883	4792	9470	9138
ENSG00000085978	ATG16L1	protein_coding	3731	3661	2598	2542	6498	2811	2898	3131	3264	2858
ENSG00000085982	USP40	protein_coding	4333	4200	3338	3460	9140	3960	3350	3161	6634	5894
ENSG00000085998	POMGNT1	protein_coding	8820	8603	9078	8977	24727	10777	7852	8365	10619	9976
ENSG00000085999	RAD54L	protein_coding	1736	1700	3814	3842	9143	3558	3365	3436	3027	2758
ENSG00000086015	MAST2	protein_coding	8516	8736	14290	14426	28072	11280	10681	10590	15068	14922
ENSG00000086061	DNAJA1	protein_coding	66844	60598	35882	37086	114517	51834	58692	60720	95470	81370
ENSG00000086062	B4GALT1	protein_coding	10664	10655	13919	14129	50123	22089	13143	12906	10427	9981
ENSG00000086065	CHMP5	protein_coding	10111	9399	6623	7278	18716	8634	6139	6508	9315	8047
ENSG00000086102	NFX1	protein_coding	6892	6831	6091	5936	17334	7681	5976	6213	8223	7754
ENSG00000086159	AQP6	protein_coding	1	4	4	2	44	13	6	7	0	0
ENSG00000086189	DIMT1	protein_coding	5632	5570	3318	3192	9465	4823	3330	3498	5646	4922
ENSG00000086200	IPO11	protein_coding	4927	4490	2696	2769	7717	3245	2915	3031	5603	5042
ENSG00000086205	FOLH1	protein_coding	80	106	234	220	443	202	155	134	80	85
ENSG00000086232	EIF2AK1	protein_coding	29582	29513	24185	23998	56926	25247	21509	20860	35695	31643
ENSG00000086288	NME8	protein_coding	0	0	4	4	1	0	4	0	0	0
ENSG00000086289	EPDR1	protein_coding	3173	2994	7138	6848	14021	5446	3248	3314	3685	3435
ENSG00000086300	SNX10	protein_coding	711	730	2228	2198	5046	2281	1059	1015	1263	1131
ENSG00000086475	SEPHS1	protein_coding	11587	11327	7353	7428	15957	7358	7167	6980	15474	13976
ENSG00000086504	MRPL28	protein_coding	7424	6732	5885	5968	15401	6522	4947	5427	8197	7791
ENSG00000086506	HBQ1	protein_coding	0	0	0	0	0	0	0	0	0	0
ENSG00000086544	ITPKC	protein_coding	2583	2426	1741	1608	6455	2812	2018	2061	2002	2017
ENSG00000086548	CEACAM6	protein_coding	0	0	1	0	3	0	0	2	0	0
ENSG00000086570	FAT2	protein_coding	6	9	42	42	180	68	63	53	4	9
ENSG00000086589	RBM22	protein_coding	8337	8031	6109	5953	13138	5607	6787	6380	8454	7928
ENSG00000086598	TMED2	protein_coding	31298	28408	19753	19517	53567	22915	20052	19128	28949	25858
ENSG00000086619	ERO1B	protein_coding	1405	1279	804	730	2211	999	646	689	425	446
ENSG00000086666	ZFAND6	protein_coding	4289	3949	4239	4392	9952	4725	3869	3896	4879	4359
ENSG00000086696	HSD17B2	protein_coding	41	45	6	7	84	55	38	32	5	3
ENSG00000086712	TXLNG	protein_coding	4566	4322	2407	2601	7593	3488	3415	3477	4837	3959
ENSG00000086717	PPEF1	protein_coding	4	7	5	2	19	11	3	8	5	1
ENSG00000086730	LAT2	protein_coding	2076	1882	4628	4372	10837	4697	3155	3532	2433	2481
ENSG00000086758	HUWE1	protein_coding	44362	42776	27796	34926	87694	33650	43656	43065	61949	56701
ENSG00000086827	ZW10	protein_coding	7058	6693	5122	5366	11971	5153	4477	4439	8113	7284
ENSG00000086848	ALG9	protein_coding	1178	1135	1376	1273	3560	1478	1471	1464	1178	1081
ENSG00000086967	MYBPC2	protein_coding	4	2	14	13	112	32	29	19	7	6
ENSG00000086991	NOX4	protein_coding	124	123	777	722	1580	645	502	443	307	232
ENSG00000087008	ACOX3	protein_coding	433	487	630	708	1625	756	519	549	509	490
ENSG00000087053	MTMR2	protein_coding	11841	11478	5819	5801	16025	7398	6383	6314	12450	10973
ENSG00000087074	PPP1R15A	protein_coding	9021	9358	3865	3792	9563	5142	4170	4949	5377	4841
ENSG00000087076	HSD17B14	protein_coding	374	321	701	640	1491	645	526	557	440	421
ENSG00000087077	TRIP6	protein_coding	6319	6350	8429	7927	15507	6860	5539	6317	9289	9626
ENSG00000087085	ACHE	protein_coding	600	586	781	745	2664	1020	742	759	379	448
ENSG00000087086	FTL	protein_coding	69035	70912	66000	69881	159204	68748	45983	49902	96067	91582
ENSG00000087087	SRRT	protein_coding	31957	32229	16651	16144	39480	16983	16935	17730	32648	29329
ENSG00000087088	BAX	protein_coding	9879	10020	12011	11365	23050	9813	6952	7944	10227	9994
ENSG00000087095	NLK	protein_coding	5497	5300	4022	3941	10411	4697	4669	4770	5892	5681
ENSG00000087111	PIGS	protein_coding	4246	4309	6482	6250	14775	5785	4604	4505	5272	5076
ENSG00000087116	ADAMTS2	protein_coding	326	272	1433	1452	3812	1539	1036	923	433	454
ENSG00000087128	TMPRSS11E	protein_coding	2	5	3	1	15	6	2	5	3	1
ENSG00000087152	ATXN7L3	protein_coding	11311	10726	7582	7864	23766	10038	7230	8033	12089	12221
ENSG00000087157	PGS1	protein_coding	2371	2241	3744	3497	6784	2651	2717	2753	2071	2166
ENSG00000087191	PSMC5	protein_coding	32559	31464	19079	19141	47311	21276	17208	18926	36003	31794
ENSG00000087206	UIMC1	protein_coding	3067	2731	3106	2997	6935	3167	3077	3138	4687	4069
ENSG00000087237	CETP	protein_coding	1	3	2	3	7	2	3	0	1	0
ENSG00000087245	MMP2	protein_coding	22467	21490	32379	31659	78830	31813	24434	25118	22076	19718
ENSG00000087250	MT3	protein_coding	0	0	0	2	0	0	0	0	0	0
ENSG00000087253	LPCAT2	protein_coding	61	44	77	51	157	48	31	35	38	43
ENSG00000087258	GNAO1	protein_coding	1000	922	1936	2072	3096	1137	696	675	1448	1424
ENSG00000087263	OGFOD1	protein_coding	7941	7249	5530	5696	16528	7479	6593	6698	6264	5901
ENSG00000087266	SH3BP2	protein_coding	1966	1925	2956	2658	6982	2770	1564	1625	1388	1555
ENSG00000087269	NOP14	protein_coding	9120	8894	3382	3502	10811	4775	4735	5147	8992	8017
ENSG00000087274	ADD1	protein_coding	12093	11775	9592	9713	23651	10071	9552	9165	16699	15060
ENSG00000087299	L2HGDH	protein_coding	2897	2759	4817	4995	10060	4509	3111	3455	3377	3125
ENSG00000087301	TXNDC16	protein_coding	766	709	1189	1268	2992	1254	965	864	503	436
ENSG00000087302	RTRAF	protein_coding	18499	17592	12023	12287	29065	13926	11379	11701	20521	16468
ENSG00000087303	NID2	protein_coding	86	93	139	140	735	276	415	335	50	61
ENSG00000087338	GMCL1	protein_coding	5940	5708	5881	5863	11592	5352	3530	3420	4644	4187
ENSG00000087365	SF3B2	protein_coding	35543	34103	22297	22052	55942	25386	23039	23179	38325	34066
ENSG00000087448	KLHL42	protein_coding	5313	4897	6474	6712	20445	9510	4916	5092	3987	3605
ENSG00000087460	GNAS	protein_coding	76117	77493	67580	68658	166006	70707	59335	56751	82351	72480
ENSG00000087470	DNM1L	protein_coding	14672	13566	12015	12121	28793	12578	12453	11883	17309	15148
ENSG00000087494	PTHLH	protein_coding	2072	2128	1002	847	5162	2745	1173	1322	491	493
ENSG00000087495	PHACTR3	protein_coding	79	100	283	275	470	240	144	148	90	81
ENSG00000087502	ERGIC2	protein_coding	11759	10727	7908	7988	21787	9320	8562	7987	10532	9042
ENSG00000087510	TFAP2C	protein_coding	18	25	2	0	11	7	5	5	2	0
ENSG00000087586	AURKA	protein_coding	8464	7587	6385	6365	16687	7029	21455	21172	44664	41180
ENSG00000087589	CASS4	protein_coding	326	316	78	110	742	390	300	270	76	101
ENSG00000087842	PIR	protein_coding	628	531	795	776	1515	672	360	405	817	823
ENSG00000087884	AAMDC	protein_coding	637	645	496	525	1168	512	403	454	548	505
ENSG00000087903	RFX2	protein_coding	728	681	1122	1076	1966	819	746	691	1457	1511
ENSG00000087995	METTL2A	protein_coding	5206	4769	3288	3185	8067	3552	2936	3038	5504	5219
ENSG00000088002	SULT2B1	protein_coding	6	5	10	11	34	15	4	7	3	0
ENSG00000088035	ALG6	protein_coding	1090	903	1306	1226	2938	1115	952	956	1235	1133
ENSG00000088038	CNOT3	protein_coding	7226	7570	5939	5620	14608	6071	6336	6048	12004	11038
ENSG00000088053	GP6	protein_coding	138	106	1092	990	1505	555	281	267	228	250
ENSG00000088179	PTPN4	protein_coding	2376	2319	2421	2509	5068	2053	2270	2165	2779	2410
ENSG00000088205	DDX18	protein_coding	28967	26642	11124	12529	36075	16766	14270	14915	28463	24288
ENSG00000088247	KHSRP	protein_coding	27744	28062	16752	16727	43101	18396	17368	17391	36217	34668
ENSG00000088256	GNA11	protein_coding	10564	10225	6817	7215	15947	6607	4987	5233	10806	10511
ENSG00000088280	ASAP3	protein_coding	789	759	2301	2307	4424	1635	1627	1672	1693	1693
ENSG00000088298	EDEM2	protein_coding	3077	2761	3746	3632	9245	3937	3307	3060	3268	3124
ENSG00000088305	DNMT3B	protein_coding	659	657	3458	3348	4844	2085	3963	3781	4130	3776
ENSG00000088320	REM1	protein_coding	3	4	4	1	31	5	6	11	0	2
ENSG00000088325	TPX2	protein_coding	33904	30685	23057	24339	56007	25124	49237	45672	98604	87657
ENSG00000088340	FER1L4	transcribed_unitary_pseudogene	54	64	271	221	1240	435	692	857	151	164
ENSG00000088356	PDRG1	protein_coding	2287	2209	2528	2488	5810	2557	2428	2750	4023	4174
ENSG00000088367	EPB41L1	protein_coding	6926	6908	8070	8331	19206	8415	5637	5922	8787	8552
ENSG00000088386	SLC15A1	protein_coding	1	0	0	0	0	3	4	2	0	0
ENSG00000088387	DOCK9	protein_coding	1504	1462	1756	1750	4772	2036	1650	1563	2476	2364
ENSG00000088448	ANKRD10	protein_coding	6513	6289	5468	4944	12040	4575	5514	5094	2034	1963
ENSG00000088451	TGDS	protein_coding	2878	2432	1407	1445	4158	1953	1128	1251	2323	2155
ENSG00000088538	DOCK3	protein_coding	250	253	1069	982	1456	572	630	662	856	722
ENSG00000088543	C3orf18	protein_coding	1243	1179	1205	1243	2313	848	889	982	1869	1829
ENSG00000088682	COQ9	protein_coding	2462	2529	3212	3133	7384	3292	2880	2917	3787	3518
ENSG00000088726	TMEM40	protein_coding	42	37	425	397	911	389	150	186	52	49
ENSG00000088727	KIF9	protein_coding	748	740	417	469	1327	629	483	526	644	599
ENSG00000088756	ARHGAP28	protein_coding	359	359	1546	1575	2080	920	630	630	1309	1234
ENSG00000088766	CRLS1	protein_coding	2924	2666	1818	1748	4308	1856	1533	1528	3234	3156
ENSG00000088782	DEFB127	protein_coding	0	0	0	0	0	0	0	0	0	0
ENSG00000088808	PPP1R13B	protein_coding	1518	1543	1678	1835	4091	1639	1457	1461	2503	2197
ENSG00000088812	ATRN	protein_coding	7284	6820	6776	7461	19154	7362	9299	9016	10730	9849
ENSG00000088826	SMOX	protein_coding	3570	3437	1457	1456	5372	2627	1735	1933	2044	1981
ENSG00000088827	SIGLEC1	protein_coding	4	5	10	4	32	7	19	20	7	12
ENSG00000088832	FKBP1A	protein_coding	10158	10150	10108	11003	28827	12656	9401	9324	9339	8199
ENSG00000088833	NSFL1C	protein_coding	13994	13573	8461	8353	20965	9702	8991	9290	15493	14144
ENSG00000088836	SLC4A11	protein_coding	1083	1082	2736	2462	6099	2290	1517	1577	1335	1336
ENSG00000088854	C20orf194	protein_coding	1413	1322	1535	1554	4188	1812	1559	1519	2059	2071
ENSG00000088876	ZNF343	protein_coding	1755	1691	1211	1155	2530	1218	1258	1394	1446	1290
ENSG00000088881	EBF4	protein_coding	84	76	378	294	789	274	160	156	76	87
ENSG00000088882	CPXM1	protein_coding	1	0	4	4	13	3	3	6	1	0
ENSG00000088888	MAVS	protein_coding	3678	3718	10698	10541	20411	7846	8031	7904	8185	7716
ENSG00000088899	LZTS3	protein_coding	2085	2116	6352	6119	8277	3602	2406	2352	3964	3870
ENSG00000088926	F11	protein_coding	0	0	0	0	0	0	0	0	0	0
ENSG00000088930	XRN2	protein_coding	23809	22481	11674	12484	30981	13473	13869	13812	23259	20924
ENSG00000088970	KIZ	protein_coding	785	769	985	1033	1701	737	654	648	1173	1007
ENSG00000088986	DYNLL1	protein_coding	18585	17284	13833	14733	39740	17747	14212	15609	27796	24323
ENSG00000088992	TESC	protein_coding	88	87	36	39	114	51	31	32	99	91
ENSG00000089006	SNX5	protein_coding	7999	7651	7806	7742	20261	8672	8698	8477	9812	9000
ENSG00000089009	RPL6	protein_coding	80798	74486	50889	51239	127313	59623	47560	48785	84774	74182
ENSG00000089012	SIRPG	protein_coding	0	0	1	1	8	4	0	0	0	0
ENSG00000089022	MAPKAPK5	protein_coding	3619	3495	2925	2756	8735	3922	3446	3316	4399	3962
ENSG00000089041	P2RX7	protein_coding	43	31	207	165	285	131	132	120	39	63
ENSG00000089048	ESF1	protein_coding	7486	6749	2380	2659	8462	4046	4503	4509	9667	7868
ENSG00000089050	RBBP9	protein_coding	1941	1848	2863	3064	5753	2464	1810	1770	2633	2361
ENSG00000089053	ANAPC5	protein_coding	6934	6668	6576	6170	15994	6834	5842	6453	7364	6746
ENSG00000089057	SLC23A2	protein_coding	2785	2649	4129	4314	10762	4283	2678	2593	5056	4936
ENSG00000089060	SLC8B1	protein_coding	2055	1922	2761	2557	6743	2713	2186	2378	1575	1654
ENSG00000089063	TMEM230	protein_coding	6208	6337	6742	6848	15273	6666	4856	4838	7667	6546
ENSG00000089091	DZANK1	protein_coding	231	203	270	237	815	277	316	309	351	319
ENSG00000089094	KDM2B	protein_coding	2736	2715	3894	3984	8258	3722	2825	2841	4802	4686
ENSG00000089101	CFAP61	protein_coding	12	13	8	7	19	8	11	10	6	7
ENSG00000089116	LHX5	protein_coding	362	342	164	178	731	302	118	119	52	77
ENSG00000089123	TASP1	protein_coding	410	443	403	379	822	384	406	443	613	610
ENSG00000089127	OAS1	protein_coding	42	42	144	155	373	169	144	162	16	8
ENSG00000089154	GCN1	protein_coding	19163	18206	14676	16870	45286	17793	18177	18244	27343	26887
ENSG00000089157	RPLP0	protein_coding	165812	150313	130352	133757	328161	151650	97467	109217	183518	171965
ENSG00000089159	PXN	protein_coding	22115	22854	16946	16313	61232	24802	24827	26124	28673	27848
ENSG00000089163	SIRT4	protein_coding	58	52	69	72	113	47	68	71	35	36
ENSG00000089169	RPH3A	protein_coding	15	7	5	5	21	4	15	23	22	19
ENSG00000089177	KIF16B	protein_coding	1241	1265	1818	1881	4980	2280	1600	1518	2379	2088
ENSG00000089195	TRMT6	protein_coding	6801	6123	4059	4313	11808	6222	4400	4522	7330	6187
ENSG00000089199	CHGB	protein_coding	552	514	430	397	1553	681	710	798	280	245
ENSG00000089220	PEBP1	protein_coding	15279	13920	14074	14335	34806	16523	12001	11948	16134	14558
ENSG00000089225	TBX5	protein_coding	22	22	48	57	64	21	10	18	5	3
ENSG00000089234	BRAP	protein_coding	2965	2753	2305	2412	6295	2806	3012	2947	3392	2937
ENSG00000089248	ERP29	protein_coding	20362	18862	25520	23538	62620	26961	20625	22278	19413	17494
ENSG00000089250	NOS1	protein_coding	537	520	594	630	2142	875	536	589	596	587
ENSG00000089280	FUS	protein_coding	74484	70766	42198	39722	107352	46511	36402	42244	66606	63325
ENSG00000089289	IGBP1	protein_coding	4492	4284	2941	3016	7282	3239	2942	2850	4460	4276
ENSG00000089327	FXYD5	protein_coding	10549	10701	12024	11360	32741	13135	12264	12044	9722	8680
ENSG00000089335	ZNF302	protein_coding	3140	3051	3336	3277	7044	3210	3457	3170	3845	3465
ENSG00000089351	GRAMD1A	protein_coding	2652	2934	4621	4433	13078	5475	3758	3836	5180	5569
ENSG00000089356	FXYD3	protein_coding	0	0	0	0	0	1	0	0	0	0
ENSG00000089472	HEPH	protein_coding	123	125	173	157	548	177	130	128	90	76
ENSG00000089486	CDIP1	protein_coding	2542	2636	3846	4076	8692	3353	2637	2708	3205	3305
ENSG00000089505	CMTM1	protein_coding	570	580	828	881	2442	980	842	749	540	511
ENSG00000089558	KCNH4	protein_coding	9	11	14	12	144	55	33	35	6	8
ENSG00000089597	GANAB	protein_coding	49094	45083	53756	54342	150632	60481	46213	48393	48214	47047
ENSG00000089639	GMIP	protein_coding	189	174	790	735	1685	592	515	599	462	411
ENSG00000089682	RBM41	protein_coding	1109	1049	1355	1215	2858	1235	1483	1330	1343	1297
ENSG00000089685	BIRC5	protein_coding	23335	21755	15169	15602	37621	16462	17411	17918	42769	40305
ENSG00000089692	LAG3	protein_coding	155	158	267	151	845	303	385	400	246	261
ENSG00000089693	MLF2	protein_coding	30315	30210	23219	22052	60265	27241	22084	22473	37158	36366
ENSG00000089723	OTUB2	protein_coding	1312	1110	494	593	1969	838	637	627	1237	1221
ENSG00000089737	DDX24	protein_coding	18856	17549	9435	10261	29782	14019	12503	13725	14499	12636
ENSG00000089775	ZBTB25	protein_coding	1351	1406	2794	2658	5840	2303	1527	1499	1065	924
ENSG00000089818	NECAP1	protein_coding	3243	3292	3015	3168	6810	3207	2965	3046	3863	3140
ENSG00000089820	ARHGAP4	protein_coding	24	24	75	47	202	70	59	83	34	38
ENSG00000089847	ANKRD24	protein_coding	93	92	247	237	532	173	223	206	225	214
ENSG00000089876	DHX32	protein_coding	490	448	1990	1950	4563	1907	1230	1076	2128	2034
ENSG00000089902	RCOR1	protein_coding	6038	5855	3242	3348	13378	6095	5281	5129	7564	6976
ENSG00000089916	GPATCH2L	protein_coding	3971	3750	4330	4649	11978	5258	5564	5396	4148	3655
ENSG00000090006	LTBP4	protein_coding	9084	9104	21532	20204	51017	18685	17493	17463	13210	13923
ENSG00000090013	BLVRB	protein_coding	4003	3576	5619	5578	11781	5231	3152	3211	3851	3905
ENSG00000090020	SLC9A1	protein_coding	4271	4329	4168	4245	9978	3673	4821	4774	3571	3403
ENSG00000090054	SPTLC1	protein_coding	12303	11344	6917	6822	20766	8997	9811	9167	11669	10133
ENSG00000090060	PAPOLA	protein_coding	24478	23337	10870	11422	28149	12495	10574	10332	24019	21103
ENSG00000090061	CCNK	protein_coding	5605	5925	3584	3631	8348	3467	4338	4090	6929	5923
ENSG00000090097	PCBP4	protein_coding	5755	5689	9597	9145	21433	8457	6956	7507	6958	6562
ENSG00000090104	RGS1	protein_coding	0	0	0	0	0	0	0	0	0	0
ENSG00000090238	YPEL3	protein_coding	402	352	1043	971	2044	739	682	631	206	226
ENSG00000090263	MRPS33	protein_coding	1298	1148	1042	1081	2586	1038	679	767	1270	1131
ENSG00000090266	NDUFB2	protein_coding	1744	1639	2124	2053	4822	1945	1263	1273	1582	1565
ENSG00000090273	NUDC	protein_coding	36027	34790	19392	18642	52775	24368	22430	23303	36794	32946
ENSG00000090316	MAEA	protein_coding	4712	4366	4319	4181	11568	4936	5047	5283	7367	7149
ENSG00000090339	ICAM1	protein_coding	42	64	41	23	164	65	57	53	21	23
ENSG00000090372	STRN4	protein_coding	7627	8209	10249	9757	23367	10698	8279	8745	12491	11871
ENSG00000090376	IRAK3	protein_coding	5	2	1	4	12	5	8	4	7	8
ENSG00000090382	LYZ	protein_coding	4	0	3	5	5	0	3	3	0	2
ENSG00000090402	SI	protein_coding	0	0	0	0	0	0	0	0	0	0
ENSG00000090432	MUL1	protein_coding	2400	2276	2049	1991	7351	3004	2585	2726	2465	2702
ENSG00000090447	TFAP4	protein_coding	2783	2695	1022	975	3985	1586	1344	1339	865	799
ENSG00000090470	PDCD7	protein_coding	5718	5622	4891	4992	12274	5346	4152	4407	4947	4802
ENSG00000090487	SPG21	protein_coding	6818	6425	6941	6959	16359	7139	5225	5383	7445	6707
ENSG00000090512	FETUB	protein_coding	10	9	20	28	16	5	5	4	0	2
ENSG00000090520	DNAJB11	protein_coding	9738	8794	7552	7433	23117	9516	8055	8690	8318	7561
ENSG00000090530	P3H2	protein_coding	1172	1302	3850	3803	12574	5579	3455	3503	1387	1280
ENSG00000090534	THPO	protein_coding	29	32	103	99	313	138	41	32	38	37
ENSG00000090539	CHRD	protein_coding	290	269	1217	1139	2781	1064	633	642	268	317
ENSG00000090554	FLT3LG	protein_coding	18	11	23	19	121	16	18	47	15	3
ENSG00000090565	RAB11FIP3	protein_coding	4007	3853	3863	3894	8671	3859	2685	2829	5393	5129
ENSG00000090581	GNPTG	protein_coding	2587	2349	2931	2642	7381	2736	2339	2682	1992	2054
ENSG00000090612	ZNF268	protein_coding	2101	1919	1116	1231	3489	1654	1710	1635	2136	1772
ENSG00000090615	GOLGA3	protein_coding	6773	6709	8036	8071	20453	8219	8594	8904	10745	10063
ENSG00000090621	PABPC4	protein_coding	33975	32672	17556	17308	49792	21825	21136	21371	35829	32689
ENSG00000090659	CD209	protein_coding	5	2	1	4	20	8	9	7	3	0
ENSG00000090661	CERS4	protein_coding	646	553	794	780	1956	729	652	604	713	719
ENSG00000090674	MCOLN1	protein_coding	961	1009	1315	1157	2840	1113	1032	991	1194	1165
ENSG00000090686	USP48	protein_coding	5199	4929	5143	5109	10881	4675	5443	5281	5985	5086
ENSG00000090776	EFNB1	protein_coding	7540	7228	4150	4228	9535	3968	2977	3013	2044	2008
ENSG00000090857	PDPR	protein_coding	17765	17239	15122	15340	49812	19517	15981	16811	13581	13031
ENSG00000090861	AARS	protein_coding	14041	13379	17410	19020	33732	14531	9148	9299	18053	16705
ENSG00000090863	GLG1	protein_coding	25378	23956	19462	20281	54249	20875	22199	21481	22420	20327
ENSG00000090889	KIF4A	protein_coding	8790	8015	8075	9062	20475	8868	13821	13416	26864	24121
ENSG00000090905	TNRC6A	protein_coding	11150	10784	8324	8800	26705	11695	11593	11497	17023	15863
ENSG00000090924	PLEKHG2	protein_coding	4432	4441	5606	5412	16053	6437	5996	5996	4944	4806
ENSG00000090932	DLL3	protein_coding	183	167	244	224	477	225	150	168	288	274
ENSG00000090971	NAT14	protein_coding	1099	991	2029	1846	4283	1712	1125	1323	1293	1311
ENSG00000090975	PITPNM2	protein_coding	467	454	1244	1197	5268	1870	1355	1374	1753	1702
ENSG00000090989	EXOC1	protein_coding	4784	4342	4936	5146	12056	5443	4809	4917	6629	5758
ENSG00000091009	RBM27	protein_coding	3366	2888	1604	1616	4853	2030	1810	1821	2903	2575
ENSG00000091010	POU4F3	protein_coding	49	31	26	18	80	44	27	22	20	12
ENSG00000091039	OSBPL8	protein_coding	10469	9774	6393	7017	21095	9310	8669	8195	9389	8561
ENSG00000091073	DTX2	protein_coding	1095	1102	2690	2570	3969	1548	2564	2331	2976	2908
ENSG00000091106	NLRC4	protein_coding	0	0	0	3	4	2	1	2	0	0
ENSG00000091127	PUS7	protein_coding	4864	4845	3054	3167	8794	3999	3675	3847	6480	5854
ENSG00000091128	LAMB4	protein_coding	6	3	2	6	8	5	4	3	3	1
ENSG00000091129	NRCAM	protein_coding	100	90	347	405	919	357	228	224	136	132
ENSG00000091136	LAMB1	protein_coding	17951	16331	16895	17635	76573	30566	45037	45491	15518	14710
ENSG00000091137	SLC26A4	protein_coding	38	27	4	3	43	27	14	22	77	70
ENSG00000091138	SLC26A3	protein_coding	0	0	0	0	0	0	0	0	0	0
ENSG00000091140	DLD	protein_coding	9745	8900	6288	6473	16952	7804	6183	6063	8519	7597
ENSG00000091157	WDR7	protein_coding	1293	1242	1713	1885	4357	1886	1995	1884	2578	2240
ENSG00000091164	TXNL1	protein_coding	10598	10153	4663	4597	10842	4823	4669	4715	11558	10459
ENSG00000091181	IL5RA	protein_coding	3	2	6	3	12	0	0	7	1	1
ENSG00000091262	ABCC6	protein_coding	27	17	229	213	279	114	89	81	39	47
ENSG00000091317	CMTM6	protein_coding	14204	13001	10543	10902	29686	13251	10101	10163	10179	9411
ENSG00000091409	ITGA6	protein_coding	35262	32269	17731	17840	69663	30448	30419	31293	22485	19610
ENSG00000091428	RAPGEF4	protein_coding	29	15	107	114	192	82	65	56	117	86
ENSG00000091436	MAP3K20	protein_coding	14595	13420	16752	18709	40510	18965	13021	13198	20346	18600
ENSG00000091482	SMPX	protein_coding	5	3	4	11	42	7	13	11	6	2
ENSG00000091483	FH	protein_coding	8769	8208	6984	7637	18763	8589	6289	6635	9340	8131
ENSG00000091490	SEL1L3	protein_coding	3232	3071	9390	9604	28649	12174	8660	8227	4557	4078
ENSG00000091513	TF	protein_coding	2	2	0	0	13	4	2	12	1	2
ENSG00000091527	CDV3	protein_coding	52969	50045	28708	30119	104589	49869	34377	37189	80600	71443
ENSG00000091536	MYO15A	protein_coding	7	4	9	4	26	12	17	27	2	8
ENSG00000091542	ALKBH5	protein_coding	10025	9836	6769	6928	15652	6756	5839	6152	10122	9109
ENSG00000091583	APOH	protein_coding	1	0	3	3	6	2	1	3	3	0
ENSG00000091592	NLRP1	protein_coding	823	803	2269	2187	4841	1972	1585	1790	998	998
ENSG00000091622	PITPNM3	protein_coding	1542	1701	1716	1834	6979	2615	1526	1594	1944	1950
ENSG00000091640	SPAG7	protein_coding	2310	2202	2100	2086	5794	2593	1975	2163	3355	2973
ENSG00000091651	ORC6	protein_coding	2938	2697	4140	3919	8966	4408	4459	4767	3963	3889
ENSG00000091656	ZFHX4	protein_coding	2650	2622	2863	3498	9247	3558	3390	3179	3798	3294
ENSG00000091664	SLC17A6	protein_coding	0	0	0	1	2	1	0	1	0	0
ENSG00000091704	CPA1	protein_coding	1	1	4	7	14	3	2	7	1	0
ENSG00000091732	ZC3HC1	protein_coding	1089	1021	989	942	2455	987	977	994	1518	1447
ENSG00000091831	ESR1	protein_coding	31	30	16	17	264	160	73	82	11	10
ENSG00000091844	RGS17	protein_coding	636	594	461	456	1686	634	268	264	392	356
ENSG00000091879	ANGPT2	protein_coding	12	4	1	1	21	9	26	21	0	0
ENSG00000091947	TMEM101	protein_coding	1811	1641	2645	2534	5557	2163	2286	2557	2371	2284
ENSG00000091972	CD200	protein_coding	226	263	596	579	1249	560	135	143	96	74
ENSG00000091986	CCDC80	protein_coding	23381	21974	13935	15328	40525	17306	18308	18831	23545	20808
ENSG00000092009	CMA1	protein_coding	0	0	0	0	0	0	0	0	0	0
ENSG00000092010	PSME1	protein_coding	3515	2980	3947	3954	9180	4223	2977	3205	4509	3927
ENSG00000092020	PPP2R3C	protein_coding	1705	1469	801	902	2908	1370	1196	1210	1776	1589
ENSG00000092036	HAUS4	protein_coding	446	409	789	801	1487	630	512	516	565	545
ENSG00000092051	JPH4	protein_coding	3771	3872	5190	5488	12753	4938	4568	4591	3271	3106
ENSG00000092054	MYH7	protein_coding	0	1	3	0	3	1	2	2	0	0
ENSG00000092067	CEBPE	protein_coding	0	0	0	0	1	2	1	2	0	1
ENSG00000092068	SLC7A8	protein_coding	329	343	205	293	678	286	277	231	255	199
ENSG00000092094	OSGEP	protein_coding	4395	4184	4085	3679	9070	3998	3445	3720	3688	3128
ENSG00000092096	SLC22A17	protein_coding	750	777	2203	1992	5244	1865	1321	1412	751	759
ENSG00000092098	RNF31	protein_coding	1027	1079	1405	1464	3979	1641	1567	1821	1894	2052
ENSG00000092108	SCFD1	protein_coding	5603	5149	3788	3890	8622	3625	3193	3073	5787	4883
ENSG00000092140	G2E3	protein_coding	1728	1573	1874	1779	4203	1691	4573	4239	6781	6038
ENSG00000092148	HECTD1	protein_coding	12356	11672	10313	11886	27283	11262	12689	12347	17038	15253
ENSG00000092199	HNRNPC	protein_coding	114161	106486	42951	45055	117027	57026	44521	46780	103674	86702
ENSG00000092200	RPGRIP1	protein_coding	7	16	35	44	84	28	25	28	4	2
ENSG00000092201	SUPT16H	protein_coding	30462	27859	20717	22230	54249	24984	19817	20257	33412	29591
ENSG00000092203	TOX4	protein_coding	7844	7997	5064	5192	14300	6124	5896	5770	8095	7621
ENSG00000092208	GEMIN2	protein_coding	853	761	966	1007	2232	962	943	994	1506	1418
ENSG00000092295	TGM1	protein_coding	687	573	1292	1449	2725	1232	731	796	1025	1014
ENSG00000092330	TINF2	protein_coding	1741	1643	2193	2209	5308	2293	1927	1960	2658	2459
ENSG00000092345	DAZL	protein_coding	0	0	0	0	0	1	0	0	1	1
ENSG00000092377	TBL1Y	protein_coding	0	0	0	0	0	0	0	0	0	0
ENSG00000092421	SEMA6A	protein_coding	254	258	1826	1758	2251	988	702	602	167	164
ENSG00000092439	TRPM7	protein_coding	4146	3637	4104	4293	9607	4079	3121	3165	5603	4777
ENSG00000092445	TYRO3	protein_coding	3809	3571	4027	3933	8295	3233	2388	2454	3839	3689
ENSG00000092470	WDR76	protein_coding	3856	3867	3138	3058	4553	1964	1063	1012	1522	1499
ENSG00000092529	CAPN3	protein_coding	0	5	2	2	13	5	1	3	1	0
ENSG00000092531	SNAP23	protein_coding	6668	6104	5210	5526	12484	5770	5047	5427	6869	6040
ENSG00000092607	TBX15	protein_coding	840	841	1113	1157	2888	1269	767	820	811	791
ENSG00000092621	PHGDH	protein_coding	17919	16878	23243	22688	48433	22373	13834	14239	18863	17996
ENSG00000092758	COL9A3	protein_coding	10	10	42	26	194	89	65	60	7	11
ENSG00000092820	EZR	protein_coding	53323	52099	27752	28818	112970	53270	46963	47472	87656	76046
ENSG00000092841	MYL6	protein_coding	7323	7048	9013	9162	19791	9002	6395	7327	9155	7424
ENSG00000092847	AGO1	protein_coding	13223	12971	8923	9757	28677	11645	10051	10427	11682	10482
ENSG00000092850	TEKT2	protein_coding	7	9	10	7	21	5	9	4	8	7
ENSG00000092853	CLSPN	protein_coding	9395	8726	9464	11147	24235	10884	7218	7161	4877	4336
ENSG00000092871	RFFL	protein_coding	983	894	1399	1291	2820	1138	1032	994	1690	1594
ENSG00000092929	UNC13D	protein_coding	3589	3720	6140	6221	16210	6398	7469	8074	6179	6576
ENSG00000092931	MFSD11	protein_coding	1018	881	1471	1496	4393	1632	1248	1300	644	586
ENSG00000092964	DPYSL2	protein_coding	4113	4082	9448	10169	23044	8757	6868	7075	3221	2721
ENSG00000092969	TGFB2	protein_coding	8084	8302	21967	21658	45625	18113	17459	15758	12690	10575
ENSG00000092978	GPATCH2	protein_coding	2925	2704	1572	1668	4270	1973	1962	1824	2360	2104
ENSG00000093000	NUP50	protein_coding	19755	18313	12046	12666	35246	16120	18176	17865	28819	25148
ENSG00000093009	CDC45	protein_coding	5032	4829	10005	9877	22755	10618	5879	6150	6195	5492
ENSG00000093010	COMT	protein_coding	6486	6160	5663	5262	13451	5617	4030	4212	6549	6757
ENSG00000093072	ADA2	protein_coding	0	0	6	6	35	11	11	14	1	0
ENSG00000093100	AC016026.1	processed_transcript	30	9	49	46	196	59	63	75	6	12
ENSG00000093134	VNN3	protein_coding	0	0	0	0	2	0	0	0	1	0
ENSG00000093144	ECHDC1	protein_coding	7273	6722	4637	4718	11515	5176	4349	4538	7843	6961
ENSG00000093167	LRRFIP2	protein_coding	6295	6030	6284	6172	14188	6573	6862	7013	9837	8726
[truncated: 56,736 more rows]

## Sheet: TPM_all
gene_name	gene_biotype	ensemble_id	G1_rep1	G1_rep2	G1S_rep1	G1S_rep2	S_rep1	S_rep2	G2_rep1	G2_rep2	M_rep1	M_rep2
TSPAN6	protein_coding	ENSG00000000003	39.048	37.1956	36.843	41.458	43.1838	40.7223	35.5682	35.5357	31.4409	31.8623
TNMD	protein_coding	ENSG00000000005	0	0	0	0	0	0	0	0	0	0.015031
DPM1	protein_coding	ENSG00000000419	306.024	270.919	154.874	140.995	169.822	213.202	176.602	181.398	223.125	205.094
SCYL3	protein_coding	ENSG00000000457	2.95077	3.08275	2.92197	2.04036	1.95846	3.21989	2.1111	2.83237	3.67439	3.27438
C1orf112	protein_coding	ENSG00000000460	11.8813	9.08433	26.4243	28.387	18.7003	19.3088	22.0826	21.1731	22.6176	21.5952
FGR	protein_coding	ENSG00000000938	0	0	0	0	0	0	0	0	0	0
CFH	protein_coding	ENSG00000000971	0.956606	0.439789	1.30224	1.07587	0.935211	1.22799	0.84741	1.24057	0.409215	0.317153
FUCA2	protein_coding	ENSG00000001036	99.9851	95.6106	124.561	122.587	120.943	117.84	99.3539	101.836	82.4605	85.7434
GCLC	protein_coding	ENSG00000001084	33.7999	31.4522	36.9205	35.4325	33.4393	36.6792	30.5226	31.1407	35.8964	33.043
NFYA	protein_coding	ENSG00000001167	54.7528	53.2122	42.6881	44.9974	48.8327	54.0721	66.4679	68.3765	86.36	85.8357
STPG1	protein_coding	ENSG00000001460	4.21836	5.58699	6.00009	5.95295	3.84709	4.60315	3.81727	4.71547	5.97405	6.62624
NIPAL3	protein_coding	ENSG00000001461	12.5219	10.8111	19.9431	19.1479	14.5226	12.5682	14.4848	14.5072	8.57616	8.48553
LAS1L	protein_coding	ENSG00000001497	81.7278	77.1934	65.3358	71.1093	61.4681	68.2318	57.0771	61.2693	87.3933	85.4955
ENPP4	protein_coding	ENSG00000001561	6.12634	5.89616	14.733	14.2153	12.1866	12.3945	7.47366	7.26781	7.48369	7.27051
SEMA3F	protein_coding	ENSG00000001617	23.9139	21.8549	30.7464	31.1824	45.6827	39.2418	29.2543	31.1828	15.8308	17.857
CFTR	protein_coding	ENSG00000001626	0.007081	0.005132	0.039359	0.019487	0.018516	0.014796	0.007819	0.013417	0	0.004122
ANKIB1	protein_coding	ENSG00000001629	44.2336	42.5633	42.2651	43.2774	27.9266	29.1673	34.8875	34.3699	66.2296	61.3788
CYP51A1	protein_coding	ENSG00000001630	80.3464	74.8994	90.3903	90.9601	90.38	87.2833	89.8825	85.4779	88.1394	88.5712
KRIT1	protein_coding	ENSG00000001631	15.3652	14.5723	20.3784	22.3455	20.0167	19.8058	22.512	26.8605	27.6556	27.4951
RAD52	protein_coding	ENSG00000002016	11.2889	12.0041	24.3898	20.4517	13.2847	11.499	16.76	18.0863	12.1966	12.6689
MYH16	transcribed_unitary_pseudogene	ENSG00000002079	5.2269	4.5639	4.44239	4.47428	5.64991	5.0377	7.85521	8.02573	5.12238	4.74435
BAD	protein_coding	ENSG00000002330	59.479	53.9561	109.742	105.763	81.8437	82.9495	44.1962	56.5769	60.7109	69.0495
LAP3	protein_coding	ENSG00000002549	101.302	94.0552	59.4428	56.6188	77.6313	75.2689	65.8973	88.3046	83.6675	73.1737
CD99	protein_coding	ENSG00000002586	55.0388	54.6315	71.3264	69.5671	76.0554	75.0933	58.9376	67.3255	58.0023	61.2318
HS3ST1	protein_coding	ENSG00000002587	0	0.005998	0	0	0	0	0	0	0	0
AOC1	protein_coding	ENSG00000002726	0.017633	0	0.008602	0.07094	0.072397	0.037441	0.020156	0.031041	0	0
WNT16	protein_coding	ENSG00000002745	0	0	0	0	0	0	0	0.007352	0	0
HECW1	protein_coding	ENSG00000002746	3.46048	3.03906	6.01356	6.53601	4.02291	4.12967	3.58723	3.82964	4.03501	3.16226
MAD1L1	protein_coding	ENSG00000002822	110.457	129.815	65.0664	104.632	96.1812	87.2345	95.1711	101.323	123.539	159.501
LASP1	protein_coding	ENSG00000002834	301.52	339.021	183.051	113.811	242.296	260.525	214.009	241.322	306.485	326.62
SNX11	protein_coding	ENSG00000002919	15.3108	14.3205	15.9767	16.1291	12.632	17.076	20.178	20.5191	18.997	17.858
TMEM176A	protein_coding	ENSG00000002933	0.684075	0.663596	1.02719	1.63801	1.74642	1.11441	1.22692	1.39092	0.713343	0.779451
M6PR	protein_coding	ENSG00000003056	89.9295	87.4251	89.0962	73.4746	79.9084	83.9344	76.5761	79.9794	76.788	79.1571
KLHL13	protein_coding	ENSG00000003096	2.28835	2.0877	5.3768	5.45191	3.82607	3.73955	2.523	2.75958	2.69473	3.12331
CYP26B1	protein_coding	ENSG00000003137	15.2041	17.4445	31.0592	37.4306	23.4408	25.87	12.6246	7.1239	5.32921	9.12952
ICA1	protein_coding	ENSG00000003147	0.523338	0.453429	1.9776	2.34716	1.43053	1.50048	1.00386	0.840994	0.912077	0.999863
DBNDD1	protein_coding	ENSG00000003249	6.42028	6.36766	11.4758	10.6622	9.69627	9.6118	7.17499	7.83203	8.86102	10.0585
ALS2	protein_coding	ENSG00000003393	23.0725	23.1015	21.9151	21.2338	23.0069	23.9414	25.2191	25.8421	28.5618	28.7078
CASP10	protein_coding	ENSG00000003400	0.267281	0.172173	1.32793	1.47011	1.03372	1.22765	1.10067	0.745679	0.27915	0.238347
CFLAR	protein_coding	ENSG00000003402	13.6345	9.35308	17.2941	22.9894	19.1953	20.5115	20.0645	18.7426	15.2588	16.182
TFPI	protein_coding	ENSG00000003436	35.3625	34.3345	31.6054	32.887	34.8419	34.6004	24.2595	23.8981	22.2672	22.9171
NDUFAF7	protein_coding	ENSG00000003509	34.0888	33.3217	39.2161	35.877	28.1396	32.0834	33.5132	36.0494	34.1954	29.9597
RBM5	protein_coding	ENSG00000003756	49.2673	50.8566	90.0879	79.8421	74.7748	76.0748	98.6685	104.924	32.468	27.4332
MTMR7	protein_coding	ENSG00000003987	0.099855	0.02665	0.150303	0.05522	0.336946	0.364728	0.253375	0.179902	0.067674	0.078723
SLC7A2	protein_coding	ENSG00000003989	7.73431	9.95363	9.40064	15.9074	6.74561	11.4811	20.5862	9.96529	10.0747	9.74612
ARF5	protein_coding	ENSG00000004059	70.9983	63.5872	74.8839	73.5746	70.6731	75.8506	58.8573	61.5563	75.6365	80.9181
SARM1	protein_coding	ENSG00000004139	1.10852	1.15262	0.317959	0.525068	0.797307	0.81912	0.584009	0.194396	0.493927	0.40072
POLDIP2	protein_coding	ENSG00000004142	159.04	154.265	126.875	126.03	124.036	127.341	97.5884	106.07	160.342	175.81
PLXND1	protein_coding	ENSG00000004399	24.5666	22.5175	43.4613	46.5217	73.4834	62.7774	53.33	55.4487	23.4027	25.8422
AK2	protein_coding	ENSG00000004455	174.353	165.307	128.705	139.323	125.521	143.777	131.545	139.605	150.504	144.937
CD38	protein_coding	ENSG00000004468	0.004121	0.004221	0.009262	0.031337	0.030824	0.008581	0.00479	0.004855	0.016337	0.005127
FKBP4	protein_coding	ENSG00000004478	364.745	351.776	209.772	216.972	214.035	222.25	241.533	250.857	409.266	406.319
KDM1A	protein_coding	ENSG00000004487	111.449	101.993	95.1231	90.4632	75.577	79.5585	89.5854	86.345	164.955	168.098
RBM6	protein_coding	ENSG00000004534	50.3515	51.804	45.2026	46.7747	47.9175	47.3265	79.468	66.8136	92.0532	88.2935
CAMKK1	protein_coding	ENSG00000004660	10.2025	9.14086	11.6998	11.5648	22.5601	21.7339	13.5479	13.8363	12.8121	13.7603
RECQL	protein_coding	ENSG00000004700	99.4455	96.7004	102.579	122.927	132.871	143.069	119.395	112.713	66.9272	71.3637
VPS50	protein_coding	ENSG00000004766	7.0728	6.31438	12.1648	9.90966	7.05032	8.80417	9.09985	8.10873	11.9647	10.8519
HSPB6	protein_coding	ENSG00000004776	0.43078	0.525791	0.320945	0.84168	0.183623	0.349451	0.229831	0.33511	1.02874	0.289437
ARHGAP33	protein_coding	ENSG00000004777	2.11794	2.281	17.7677	14.4556	8.78034	9.35164	12.4979	11.5111	6.74859	8.94682
NDUFAB1	protein_coding	ENSG00000004779	146.767	128.895	107.476	98.8764	94.3679	98.2792	70.3856	80.8106	127.372	132.078
PDK4	protein_coding	ENSG00000004799	0.747512	0.607426	0.346565	0.481066	0.764528	0.871963	0.393456	0.456159	0.454742	0.435289
SLC22A16	protein_coding	ENSG00000004809	0.071839	0.036511	0	0.018456	0.02221	0	0.012863	0.061462	0.122524	0.129907
ZMYND10	protein_coding	ENSG00000004838	0.746591	1.35575	1.95539	1.25611	1.75558	1.17465	1.89334	1.61445	1.00313	1.04191
ABCB5	protein_coding	ENSG00000004846	0.027568	0.032881	0.216311	0.201934	0.10817	0.146204	0.060645	0.061436	0.038179	0.058302
ARX	protein_coding	ENSG00000004848	0	0.028696	0.100201	0.079651	0.212507	0.15128	0.014113	0.03827	0.008103	0.008788
SLC25A13	protein_coding	ENSG00000004864	39.7238	38.8973	34.4238	34.9217	30.0816	31.6831	29.7189	30.1642	52.9997	51.7663
ST7	protein_coding	ENSG00000004866	18.4213	17.3558	17.8413	15.0746	13.3226	14.5074	14.7047	15.0738	14.9793	15.5616
CDC27	protein_coding	ENSG00000004897	54.6018	61.4021	54.9357	61.0409	51.0484	55.0696	87.9648	85.1987	152.807	144.894
SLC4A1	protein_coding	ENSG00000004939	0.01889	0	0.005439	0.010902	0.008291	0.004997	0.024688	0.024345	0.0047	0
CALCR	protein_coding	ENSG00000004948	0.137722	0.174841	0.059487	0.049503	0.183778	0.112726	0.106242	0.119918	0.045952	0.081792
HCCS	protein_coding	ENSG00000004961	39.9142	39.2695	31.1942	29.7349	28.6806	29.5889	27.1347	29.2195	43.1103	43.0214
DVL2	protein_coding	ENSG00000004975	14.737	14.4268	25.9354	24.4143	18.1875	19.4907	18.0809	17.7851	29.059	24.5489
PRSS22	protein_coding	ENSG00000005001	0	0.062172	0.019456	0	0.201195	0.352261	0.287292	0.059559	0	0
UPF1	protein_coding	ENSG00000005007	43.8908	43.0042	43.2024	45.7569	43.9372	46.4746	43.7009	47.1576	53.4165	57.6429
SKAP2	protein_coding	ENSG00000005020	0.023485	0.035985	0.106682	0.119742	0.08928	0.149795	0.078703	0.048063	0.017371	0.062928
SLC25A5	protein_coding	ENSG00000005022	494.411	459.193	435.253	431.166	419.465	426.015	332.729	349.928	521.443	540.918
MCUB	protein_coding	ENSG00000005059	21.0785	18.228	36.7043	39.3016	31.144	31.6134	22.9224	22.902	21.1991	19.3244
HOXA11	protein_coding	ENSG00000005073	18.345	18.8676	13.0474	13.78	14.8625	14.8299	11.8278	11.835	9.1288	9.55284
POLR2J	protein_coding	ENSG00000005075	165.725	167.461	151.31	158.397	132.953	137.025	110.644	121.732	189.724	180.011
DHX33	protein_coding	ENSG00000005100	30.4756	32.6995	24.1402	24.5352	31.1062	34.369	31.8521	34.0726	36.5332	38.679
MEOX1	protein_coding	ENSG00000005102	0.074638	0.10475	0.143215	0.230397	0.442954	0.54234	0.497128	0.50106	1.01926	0.951884
THSD7A	protein_coding	ENSG00000005108	0.002764	0.00573	0.073019	0.099897	0.031614	0.021276	0.043399	0.033035	0.034677	0.019002
LIG3	protein_coding	ENSG00000005156	14.4726	12.9689	11.8522	12.7663	13.1453	14.1545	17.4276	18.4416	19.1421	22.6695
RPAP3	protein_coding	ENSG00000005175	69.9338	73.7844	52.5222	56.2234	52.5002	61.055	56.0799	61.0129	79.7399	73.8214
ACSM3	protein_coding	ENSG00000005187	0.822375	1.10419	1.7433	1.74649	1.06202	0.978586	1.64364	1.02822	1.44837	1.09127
REXO5	protein_coding	ENSG00000005189	4.48827	4.78089	10.8843	11.3608	10.7046	10.6931	7.50106	7.70732	7.58117	7.01827
CIAPIN1	protein_coding	ENSG00000005194	26.4907	23.3909	33.4572	29.668	29.4948	30.6837	25.3447	28.2676	35.8826	40.2676
SPPL2B	protein_coding	ENSG00000005206	7.86723	8.87487	31.8228	25.113	28.2105	19.9925	26.2106	31.864	19.2085	22.6798
FAM214B	protein_coding	ENSG00000005238	23.3704	13.7089	38.8537	22.903	25.1645	28.5361	24.5648	25.9719	16.3701	16.3539
COPZ2	protein_coding	ENSG00000005243	11.38	9.65459	25.8307	25.1712	22.3454	23.2612	16.2014	16.742	13.2846	14.4788
PRKAR2B	protein_coding	ENSG00000005249	23.9279	22.947	19.022	19.9421	17.4995	19.031	13.0813	13.7779	19.644	21.0406
MSL3	protein_coding	ENSG00000005302	17.9386	19.072	14.3547	14.8653	12.5434	12.5711	15.5124	14.7286	22.0939	24.2591
CREBBP	protein_coding	ENSG00000005339	45.955	45.8506	25.966	29.8357	29.4968	26.1885	46.5579	46.3947	81.553	71.7843
TSPOAP1	protein_coding	ENSG00000005379	0.084455	0.079898	0.7384	0.600151	1.12476	1.01699	0.758546	0.996032	0.172715	0.090184
MPO	protein_coding	ENSG00000005381	0.027595	0.042776	0.008388	0	0.521141	0.569833	0.377474	0.339875	0.014497	0.015775
PON1	protein_coding	ENSG00000005421	0	0	0	0	0.012795	0	0	0	0	0
GCFC2	protein_coding	ENSG00000005436	14.5699	15.0543	17.2782	16.9702	10.3734	12.686	9.31184	7.83129	20.3773	21.1154
WDR54	protein_coding	ENSG00000005448	30.6763	29.5839	37.9837	38.8454	35.2743	34.5737	28.8114	28.533	31.0764	33.3816
CROT	protein_coding	ENSG00000005469	3.43374	3.26908	10.3842	8.9695	6.08327	5.96339	4.5289	5.17669	3.86634	4.29366
ABCB4	protein_coding	ENSG00000005471	1.94203	1.89301	4.42371	4.16132	3.80088	4.21651	1.78897	1.76149	1.50058	1.24862
KMT2E	protein_coding	ENSG00000005483	26.4951	28.576	22.0757	23.256	15.3906	16.2783	29.3374	28.4368	19.1833	17.6968
RHBDD2	protein_coding	ENSG00000005486	56.3971	50.4777	67.5454	75.7388	81.4327	70.0866	76.1041	80.8754	44.7858	50.8326
SOX8	protein_coding	ENSG00000005513	1.07083	1.00853	1.60332	1.3179	6.29558	6.54287	1.64468	1.88499	0.963495	1.19579
IBTK	protein_coding	ENSG00000005700	17.555	18.5372	22.266	22.1326	20.5027	20.5286	24.2616	21.3794	25.2646	24.0363
ZNF195	protein_coding	ENSG00000005801	24.0299	20.6445	13.964	24.0438	27.1512	26.4745	14.4057	23.9931	26.194	20.7266
MYCBP2	protein_coding	ENSG00000005810	15.6415	16.4994	12.2909	22.8176	17.7778	17.8407	22.9955	22.6984	24.2599	25.6645
FBXL3	protein_coding	ENSG00000005812	25.2546	25.3984	22.4744	22.2288	22.0864	24.1614	22.6734	23.5331	28.9048	28.09
ITGAL	protein_coding	ENSG00000005844	0	0.00462	0.015467	0.017595	0.01685	0.009473	0.02078	0.019887	0.017211	0.048407
PDK2	protein_coding	ENSG00000005882	12.5928	17.7045	13.9708	15.4123	20.787	16.33	11.4574	10.5165	22.9278	15.1521
ITGA3	protein_coding	ENSG00000005884	334.384	321.212	215.383	206.187	315.798	300.351	275.729	281.558	294.719	314.057
ZFX	protein_coding	ENSG00000005889	9.99227	14.1679	6.88701	7.39468	8.85832	9.13505	9.38292	8.61282	14.0947	10.3195
LAMP2	protein_coding	ENSG00000005893	126.086	121.529	153.132	146.73	163.128	160.959	151.083	149.491	103.051	103.737
ITGA2B	protein_coding	ENSG00000005961	0.030711	0.091262	0.70862	0.635481	0.513146	0.361945	0.613961	0.516959	0.204832	0.526903
ASB4	protein_coding	ENSG00000005981	0.03454	0.024998	0.147496	0.078495	0.266942	0.191974	0.052701	0.299907	0	0
GDE1	protein_coding	ENSG00000006007	39.3198	37.6822	49.7117	50.117	42.3454	43.3461	39.9778	39.0851	46.4646	48.7512
REX1BD	protein_coding	ENSG00000006015	20.8714	21.2739	44.6121	41.4776	36.912	36.8175	24.6808	29.8827	29.8736	33.7808
CRLF1	protein_coding	ENSG00000006016	3.28145	3.25635	9.0277	8.59984	13.5837	11.8029	12.3872	9.85537	2.45281	2.99133
OSBPL7	protein_coding	ENSG00000006025	4.12888	4.15697	12.7592	9.67353	11.2568	10.1634	11.5457	15.9579	2.25295	2.80723
TMEM98	protein_coding	ENSG00000006042	19.7611	20.737	48.7773	48.7584	51.3779	47.1008	26.0856	29.5109	21.2526	21.6662
YBX2	protein_coding	ENSG00000006047	5.30355	6.5904	7.92113	5.54703	5.85158	5.49345	5.86726	5.96905	6.59285	7.36318
KRT33A	protein_coding	ENSG00000006059	0.046565	0.059681	0	0.015952	0.511396	0.613096	0.109464	0.20893	0	0.019704
MAP3K14	protein_coding	ENSG00000006062	15.9992	15.8175	16.1025	16.3406	21.6477	27.021	13.7909	15.1561	14.6774	11.5918
ABCC8	protein_coding	ENSG00000006071	0.174539	0.316602	1.92893	1.51268	1.25611	1.41482	0.989775	1.15331	0.35937	0.485698
CACNG3	protein_coding	ENSG00000006116	0.007589	0	0	0	0	0	0	0	0	0
TMEM132A	protein_coding	ENSG00000006118	37.9194	39.7488	74.7692	59.1929	63.2727	59.9452	52.8095	62.0915	31.7751	31.5414
AP2B1	protein_coding	ENSG00000006125	115.214	112.34	94.3654	103.066	92.8089	95.5661	90.3317	96.0258	137.345	126.775
TAC1	protein_coding	ENSG00000006128	0.192689	0.109361	0.065148	0	0.233073	0.033644	0.049643	0.108942	0.09994	0.062659
ZNF263	protein_coding	ENSG00000006194	44.5235	57.2199	18.0577	19.7662	23.5651	24.2432	26.4707	26.2422	26.8163	28.4979
CX3CL1	protein_coding	ENSG00000006210	3.59407	3.70965	2.07762	2.42762	3.02471	9.09622	1.5408	3.63225	1.62012	2.3589
SPATA20	protein_coding	ENSG00000006282	34.1719	33.3443	65.4705	64.9064	57.5696	59.2967	58.2358	61.774	50.0349	54.5244
CACNA1G	protein_coding	ENSG00000006283	1.34269	1.72304	3.09443	2.55237	3.99125	2.90521	3.84996	3.71832	1.45792	1.66631
TNFRSF12A	protein_coding	ENSG00000006327	275.691	279.604	312.184	265.446	559.113	571.188	315.833	346.847	280.936	332.415
DLX6	protein_coding	ENSG00000006377	0	0	0	0	0	0	0	0	0	0
MAP3K9	protein_coding	ENSG00000006432	17.0997	20.4037	14.6625	14.3172	10.5769	11.6501	14.4484	12.6951	12.8817	16.2309
RALA	protein_coding	ENSG00000006451	77.4152	70.4573	55.6343	54.7426	54.5326	62.2891	53.4297	57.2633	73.2886	70.2041
BAIAP2L1	protein_coding	ENSG00000006453	24.0913	22.5018	30.5895	30.2513	26.7778	28.4253	28.1664	26.4831	29.5664	29.2474
KDM7A	protein_coding	ENSG00000006459	3.73905	3.5101	3.49822	3.84337	5.47516	7.22081	3.57664	3.5048	3.01573	2.67889
ETV1	protein_coding	ENSG00000006468	3.04518	2.05613	1.83288	1.67043	0.813105	1.46836	1.96657	2.00399	1.20381	0.75079
AGK	protein_coding	ENSG00000006530	19.4235	17.2302	15.5997	22.9597	17.4776	16.3294	17.2468	24.665	26.9501	17.4206
ALDH3B1	protein_coding	ENSG00000006534	8.03879	6.80051	19.8787	18.8156	11.0928	15.6294	10.4476	10.9635	8.13986	14.36
TTC22	protein_coding	ENSG00000006555	0	0	0	0	0	0	0	0	0	0
PHTF2	protein_coding	ENSG00000006576	31.7172	28.9584	37.5894	50.6471	38.1163	36.435	24.9757	26.066	40.8756	38.851
CCL26	protein_coding	ENSG00000006606	7.19609	9.63827	19.1705	20.9093	18.1042	17.6747	11.2765	14.1388	11.5976	10.9766
FARP2	protein_coding	ENSG00000006607	30.6227	32.1134	25.4163	26.1713	32.7585	31.2149	27.9476	25.9333	31.3297	36.1576
USH1C	protein_coding	ENSG00000006611	0.513651	0.578954	1.21072	1.13536	0.881625	0.924808	0.651607	0.863576	0.629488	0.582373
GGCT	protein_coding	ENSG00000006625	119.833	121.339	148.446	150.103	121.818	142.615	99.2891	100.191	124.591	124.839
DBF4	protein_coding	ENSG00000006634	21.6306	23.2723	14.8257	15.7659	15.1852	22.409	30.5174	30.0534	61.0366	48.9184
TBXA2R	protein_coding	ENSG00000006638	0.674917	0.705616	0.878769	1.34038	1.2307	0.936817	0.942538	1.0886	0.369488	0.545386
IFRD1	protein_coding	ENSG00000006652	64.9544	63.1065	45.6611	35.2973	41.9426	49.5168	34.4635	36.9276	38.6909	35.226
LGALS14	protein_coding	ENSG00000006659	0	0	0	0	0.043524	0.125949	0.296341	0.149418	0	0
COX10	protein_coding	ENSG00000006695	16.3502	14.1166	7.89686	8.22882	9.04459	9.15461	9.66957	9.18906	17.869	17.327
GTF2IRD1	protein_coding	ENSG00000006704	17.4077	17.7942	20.2438	19.6146	20.2617	21.0252	21.8273	20.2523	34.6686	36.1179
PAF1	protein_coding	ENSG00000006712	123.289	128.851	127.661	123.807	116.555	128.568	138.295	136.646	177.706	167.33
VPS41	protein_coding	ENSG00000006715	25.7809	25.1256	30.7573	32.0673	26.7869	27.9622	25.4421	24.9106	30.3784	29.3162
ARHGAP44	protein_coding	ENSG00000006740	1.75414	2.00279	4.81703	5.0867	2.92107	3.24996	2.61102	3.12338	2.74709	2.9941
ELAC2	protein_coding	ENSG00000006744	45.4814	40.6263	41.2483	47.139	42.2836	43.8168	49.5704	45.805	53.5472	53.9903
SCIN	protein_coding	ENSG00000006747	0.203693	0.34146	0.253134	0.230548	0.243147	0.555717	0.304598	0.424212	0.194549	0.12024
ARSD	protein_coding	ENSG00000006756	0.034272	0.044006	0.059623	0.06784	0.039229	0.050656	0.033354	0.038826	0.026983	0.034261
PNPLA4	protein_coding	ENSG00000006757	6.90668	8.36428	6.53974	5.80878	6.92483	6.97631	3.96757	6.89929	8.75129	8.8924
MYH13	protein_coding	ENSG00000006788	0	0	0	0	0	0	0	0	0	0
ADIPOR2	protein_coding	ENSG00000006831	116.001	111.541	101.372	104.823	110.171	122.125	120.983	118.638	142.713	140.008
CDKL3	protein_coding	ENSG00000006837	1.86299	1.32146	1.4588	0.859415	0.978669	0.892054	0.863455	1.45389	1.5513	1.83904
UPP2	protein_coding	ENSG00000007001	0.002757	0.003197	0.008228	0.004476	0.002307	0	0	0.021018	0	0
PRSS21	protein_coding	ENSG00000007038	0	0	0	0.02737	0.038379	0	0.145896	0.048845	0	0
MARK4	protein_coding	ENSG00000007047	18.0718	18.0462	19.5343	17.452	19.9802	21.2089	15.5813	15.2577	19.4945	25.071
PROM1	protein_coding	ENSG00000007062	0	0.00552	0.048735	0.009353	0.073849	0.014232	0.027581	0.076612	0.015986	0
CCDC124	protein_coding	ENSG00000007080	214.433	214.27	173.758	166.549	146.431	162.086	121.97	147.535	220.269	230.12
CEACAM21	protein_coding	ENSG00000007129	0.062894	0	0.110998	0.225379	0.201634	0.183779	0.080209	0.118881	0.013782	0
PAFAH1B1	protein_coding	ENSG00000007168	29.2371	26.8059	30.1219	26.0711	27.0635	29.294	33.4047	30.3816	36.5698	32.6156
NOS2	protein_coding	ENSG00000007171	0.901469	0.865928	3.15929	3.36973	1.56462	1.68996	0.817381	0.782768	0.881851	0.98967
DNAH9	protein_coding	ENSG00000007174	0.007168	0.007994	0.005674	0.023246	0.025999	0.012516	0.003962	0.003996	0.001695	0.001838
KIAA0100	protein_coding	ENSG00000007202	115.708	114.034	119.936	141.75	138.816	130.266	124.685	130.409	133.344	130.755
SLC13A2	protein_coding	ENSG00000007216	0.02569	0.022777	0	0	0.221086	0.217223	0.223818	0.141998	0	0
GAS7	protein_coding	ENSG00000007237	1.92593	1.98703	4.27433	5.68698	4.07827	3.88874	2.87615	2.57961	1.77129	2.00796
TRAPPC6A	protein_coding	ENSG00000007255	3.76691	3.38987	10.2013	10.4612	9.73568	8.20646	6.2623	5.51135	3.0795	3.61575
MATK	protein_coding	ENSG00000007264	0.577518	0.559338	1.21861	1.20034	1.2689	1.58757	0.908336	1.7704	0.562954	0.730091
CEACAM7	protein_coding	ENSG00000007306	0	0	0	0	0	0	0	0	0	0
CD79B	protein_coding	ENSG00000007312	0.177589	0.056938	0.393848	0.227733	0.194375	0.21145	0.350171	0.35102	0	0
SCN4A	protein_coding	ENSG00000007314	0.27372	0.285668	0.235558	0.271148	0.508498	0.451525	0.926809	0.956407	0.184474	0.332923
ST7L	protein_coding	ENSG00000007341	16.3832	15.9629	16.2398	18.9656	18.0367	18.3515	17.1926	20.7352	14.7973	15.2315
TKTL1	protein_coding	ENSG00000007350	0.05743	0.05257	0.040759	0	0.065101	0.082263	0.054782	0	0.017583	0.019133
PAX6	protein_coding	ENSG00000007372	0	0	0	0	0.008228	0.015498	0.003737	0.007511	0	0
RPUSD1	protein_coding	ENSG00000007376	29.5803	29.5307	23.6113	24.3845	24.1176	25.2188	20.3185	20.7595	21.0648	26.0258
RHBDF1	protein_coding	ENSG00000007384	6.89383	6.68323	37.9499	38.2821	33.0707	35.7549	37.3076	33.2735	10.4598	9.56181
LUC7L	protein_coding	ENSG00000007392	44.5203	41.9048	36.772	33.984	33.7213	33.8254	54.6552	56.4701	63.6103	58.7046
CACNA2D2	protein_coding	ENSG00000007402	1.01751	1.09759	2.31598	2.61536	1.97914	2.49767	1.46456	1.61794	1.30408	1.33673
BAIAP3	protein_coding	ENSG00000007516	0.806596	0.74821	6.66539	5.18385	3.86799	3.84381	3.579	4.75603	2.23913	1.90176
TSR3	protein_coding	ENSG00000007520	129.95	129.299	106.374	99.2345	95.9563	103.496	94.3617	95.8274	125.034	138.824
PIGQ	protein_coding	ENSG00000007541	13.3532	15.1686	21.4144	22.1024	26.6824	18.8613	23.4845	22.3278	16.5517	22.6134
CRAMP1	protein_coding	ENSG00000007545	18.0853	14.363	14.9802	14.8301	15.3251	14.5056	14.389	14.6131	14.4346	14.3778
TEAD3	protein_coding	ENSG00000007866	17.819	10.7918	26.2928	24.755	43.5825	29.3165	19.6275	19.7287	17.4383	19.2544
SELE	protein_coding	ENSG00000007908	0.033568	0.01865	0	0	0.002678	0	0	0	0.006042	0
DNAJC11	protein_coding	ENSG00000007923	27.3539	27.9092	27.1454	36.1782	29.211	29.5047	37.9298	36.5107	51.2209	49.3777
FMO3	protein_coding	ENSG00000007933	0.011228	0.031611	0.025799	0.021655	0.029693	0.035613	0.089106	0.065879	0.022259	0
MYLIP	protein_coding	ENSG00000007944	16.3856	14.9774	8.00238	8.18669	8.91715	8.96766	11.0467	10.1559	13.4149	14.9759
NOX1	protein_coding	ENSG00000007952	0	0	0	0	0	0	0	0	0.009184	0
E2F2	protein_coding	ENSG00000007968	5.64909	5.13787	11.2679	11.2614	4.92579	3.95375	3.99676	3.92407	5.2381	5.69398
PSMB1	protein_coding	ENSG00000008018	439.484	410.506	298.802	294.982	273.385	309.335	240.568	262.843	445.281	426.613
SYN1	protein_coding	ENSG00000008056	2.49367	2.74383	1.9765	1.9338	7.01634	7.14903	5.34128	5.19072	0.46479	0.779004
JARID2	protein_coding	ENSG00000008083	36.2888	38.4351	13.8193	14.7381	19.697	21.0171	18.8318	18.8952	15.5763	15.3609
CDKL5	protein_coding	ENSG00000008086	2.0474	2.01603	2.33303	2.76832	2.23774	2.74962	2.45845	1.94337	2.49917	2.40019
CAMK1G	protein_coding	ENSG00000008118	0.017943	0.018227	0.20237	0.087138	0.080281	0.082136	0.076793	0.109579	0.067467	0.048431
CDK11A	protein_coding	ENSG00000008128	37.4697	38.1106	34.9867	32.287	33.1829	35.2433	42.6865	44.2318	46.4935	48.9103
NADK	protein_coding	ENSG00000008130	26.1107	21.9339	32.7144	31.21	27.5357	35.3383	24.0611	26.7241	29.3805	34.2193
TFAP2B	protein_coding	ENSG00000008196	0	0	0	0	0	0.010736	0.039555	0.004766	0	0
TFAP2D	protein_coding	ENSG00000008197	0.027392	0.03505	0.067156	0	0.022734	0.032895	0	0	0	0.014821
DLEC1	protein_coding	ENSG00000008226	0	0.003648	0.011442	0.018989	0.032943	0.040305	0.020927	0.021468	0.002369	0.00955
CYTH3	protein_coding	ENSG00000008256	72.7251	72.1696	100.289	103.409	89.7816	96.2293	117.612	119.96	173.053	174.262
ADAM22	protein_coding	ENSG00000008277	2.02498	2.00129	3.28462	3.70723	3.87376	3.3451	2.95434	3.983	2.98218	1.57055
SYPL1	protein_coding	ENSG00000008282	93.9958	88.9911	72.1545	67.9574	76.852	74.8149	80.2846	84.0328	81.2538	81.3516
CYB561	protein_coding	ENSG00000008283	31.3003	33.4877	45.7217	41.2359	39.2178	36.6319	36.7511	39.5847	27.6012	29.5547
SPAG9	protein_coding	ENSG00000008294	108.564	106.004	47.1262	50.5369	52.8363	62.7253	57.0233	59.8127	67.624	67.1305
CELSR3	protein_coding	ENSG00000008300	3.98628	4.29154	14.3463	13.0945	11.8571	9.82568	10.4138	12.4605	11.7124	12.2252
AASS	protein_coding	ENSG00000008311	7.85996	7.16085	13.0893	12.4137	12.4983	12.1782	12.4197	12.6461	8.83264	9.02694
PLEKHG6	protein_coding	ENSG00000008323	0	0	0.087017	0	0.079218	0	0	0.063992	0	0.008151
SS18L2	protein_coding	ENSG00000008324	50.509	42.4025	33.9332	32.381	36.16	37.6067	28.2008	24.0907	32.4196	28.4573
MPND	protein_coding	ENSG00000008382	6.39269	6.18995	6.1301	6.25131	5.49145	4.94314	4.66377	4.88034	7.72019	7.70805
MGST1	protein_coding	ENSG00000008394	22.3974	21.8277	36.0388	31.4858	27.3933	26.9558	21.1576	23.6729	22.6157	20.4428
CRY1	protein_coding	ENSG00000008405	42.869	41.7674	41.8495	39.7188	27.6613	30.5025	28.8774	31.7646	33.8919	36.7744
PGLYRP1	protein_coding	ENSG00000008438	0	0	0	0	0	0	0	0	0	0
NFIX	protein_coding	ENSG00000008441	14.1929	19.349	34.1859	35.9184	36.0532	32.9111	23.4995	29.3203	35.4681	33.8685
ST3GAL1	protein_coding	ENSG00000008513	86.1277	83.8329	50.0031	76.2941	83.9885	103.033	44.1394	70.3343	63.1926	68.0537
MMP25	protein_coding	ENSG00000008516	0.682497	0.877953	0.41049	0.674365	1.43466	1.3173	0.779024	0.915627	0.398662	0.536787
IL32	protein_coding	ENSG00000008517	26.6882	26.3933	22.6984	21.9489	33.6973	40.2172	27.3988	30.6036	26.8598	25.383
PKD1	protein_coding	ENSG00000008710	10.2507	10.8077	34.432	24.7707	23.0494	24.52	30.5148	31.9087	17.076	19.2421
MAPK8IP2	protein_coding	ENSG00000008735	0.18806	0.101853	0.155018	0.224731	0.438823	0.34584	0.216386	0.351335	0.108894	0.12202
MED24	protein_coding	ENSG00000008838	25.7517	22.3692	35.3517	33.4337	32.1724	31.2298	37.319	39.0205	30.6699	39.0282
RHOBTB2	protein_coding	ENSG00000008853	15.4089	15.8648	20.1108	22.6287	18.468	21.6087	19.4196	16.4942	15.7474	16.5087
HEATR5B	protein_coding	ENSG00000008869	12.7823	10.1049	20.0437	19.3498	14.7742	15.5484	15.269	15.5664	10.2386	10.3383
SEC62	protein_coding	ENSG00000008952	71.5613	66.6403	38.4052	41.4616	50.4305	49.6525	57.6858	61.6639	63.0783	59.9898
RPS20	protein_coding	ENSG00000008988	1342.1	1119.69	1217.15	1283.61	1055.02	1110.78	777.086	836.753	1352.56	1519.24
CSDE1	protein_coding	ENSG00000009307	851.021	847.54	478.926	501.844	460.92	494.129	488.612	464.483	906.729	865.764
UBE3C	protein_coding	ENSG00000009335	18.3725	17.6089	14.556	16.4989	16.1548	17.8309	17.887	18.7884	23.0094	22.5321
REV3L	protein_coding	ENSG00000009413	8.16377	7.19356	10.5522	10.3559	5.72492	5.46993	7.37393	6.85336	8.93523	8.37519
TENM1	protein_coding	ENSG00000009694	0.04167	0.043299	0.156757	0.134109	0.165016	0.113308	0.170307	0.103951	0.091156	0.110299
PAX7	protein_coding	ENSG00000009709	2.60189	3.59242	5.37031	5.13093	3.44874	3.50678	3.54595	3.51081	4.60147	4.6296
MASP2	protein_coding	ENSG00000009724	0.062857	0.182913	0.060717	0.012382	0.019671	0.090102	0.024699	0.058693	0.036885	0.065775
IYD	protein_coding	ENSG00000009765	0	0	0.118186	0.012325	0.130926	0.128169	0.015477	0.018529	0.038006	0
FAM76A	protein_coding	ENSG00000009780	3.04989	2.97659	5.01621	4.34233	4.06074	4.88384	4.06818	4.36498	2.64405	2.71433
TRAF3IP3	protein_coding	ENSG00000009790	0.051437	0	0	0.091283	0.098408	0.079168	0.0718	0.123961	0.019962	0.033884
POMT2	protein_coding	ENSG00000009830	26.4604	26.157	37.2428	35.1588	32.4752	33.4222	41.1749	37.8292	27.5699	31.8746
VTA1	protein_coding	ENSG00000009844	30.8164	35.2317	19.5108	22.3945	21.3662	23.5613	24.4748	24.9135	41.1477	37.9291
MLXIPL	protein_coding	ENSG00000009950	0.012161	0	0.506749	0.245005	0.33546	0.382516	0.485317	0.414988	0.05772	0.08611
BAZ1B	protein_coding	ENSG00000009954	87.9415	86.3903	78.4242	85.7843	77.9511	78.5115	88.2493	86.525	125.438	125.463
RANBP9	protein_coding	ENSG00000010017	25.697	25.9288	35.2155	34.7523	30.5172	33.5179	28.1514	27.562	35.619	35.7325
ETV7	protein_coding	ENSG00000010030	0.202975	0.17394	0.247554	0.290812	3.04341	3.38816	1.98406	1.86967	0.037087	0.059603
SPRTN	protein_coding	ENSG00000010072	13.6478	15.2061	13.1204	12.3008	10.4707	12.1741	15.6512	14.6593	15.4491	15.6273
METTL13	protein_coding	ENSG00000010165	38.0746	37.7834	21.5776	21.9209	30.4503	29.8236	29.2511	33.8632	38.3541	40.4062
DYRK4	protein_coding	ENSG00000010219	38.8772	34.4516	34.8385	35.2881	32.3782	32.3582	30.4312	33.3463	29.5892	28.7885
ZNF207	protein_coding	ENSG00000010244	197.899	202.827	136.399	131.697	94.6498	94.3467	183.849	175.262	224.76	230.089
UQCRC1	protein_coding	ENSG00000010256	140.34	129.734	182.306	181.235	170.181	172.987	128.342	135.564	145.24	158.088
STARD3NL	protein_coding	ENSG00000010270	121.052	117.044	98.9563	98.7446	93.6011	96.5399	73.4478	78.3679	117.219	111.391
CD9	protein_coding	ENSG00000010278	171.426	164.23	246.47	244.129	272.244	259.298	306.598	282.101	185.469	187.485
HHATL	protein_coding	ENSG00000010282	0	0	0.045939	0.072694	0.034227	0.013195	0.101445	0.076746	0	0
NCAPD2	protein_coding	ENSG00000010292	131.773	128.125	136.811	132.517	111.134	108.951	148.81	139.633	238.669	229.743
IFFO1	protein_coding	ENSG00000010295	3.36552	3.29977	4.19807	4.20041	3.513	4.70101	3.01133	3.89137	2.86997	3.59861
GIPR	protein_coding	ENSG00000010310	0.609415	0.341028	0.96088	0.730562	2.08966	1.30644	0.938788	0.695124	0.15416	0.245133
PHF7	protein_coding	ENSG00000010318	9.35265	7.95983	20.332	19.9807	13.4946	15.4381	9.4011	11.335	9.43606	11.7932
SEMA3G	protein_coding	ENSG00000010319	1.93939	1.80245	10.7837	10.2877	9.98973	8.20821	5.77942	5.97272	2.38974	3.09221
NISCH	protein_coding	ENSG00000010322	27.7232	29.1448	62.3125	60.373	48.9338	46.4478	50.51	60.1655	32.8744	34.5913
STAB1	protein_coding	ENSG00000010327	0.004249	0.009094	0	0	0.006669	0.003135	0.010297	0.010689	0.012044	0.002295
FUZ	protein_coding	ENSG00000010361	6.07685	6.05599	10.4216	8.97694	8.11996	8.52264	6.90865	6.76823	6.45888	7.02205
SLC6A13	protein_coding	ENSG00000010379	0.342037	0.33852	0.966873	0.994202	1.14585	1.38737	0.700734	0.838206	0.476429	0.410725
IDS	protein_coding	ENSG00000010404	58.0379	62.2985	67.1074	65.7577	74.2334	74.996	70.6079	73.9329	53.7563	56.1384
PRSS3	protein_coding	ENSG00000010438	0	0	0	0	0	0	0	0	0	0
ZNF200	protein_coding	ENSG00000010539	24.0548	23.2338	16.221	19.0535	19.6136	22.5844	21.7561	18.9403	12.438	10.4047
CD4	protein_coding	ENSG00000010610	0.031131	0.011602	0.036197	0.142358	0.082484	0.067665	0.115014	0.098141	0	0.01626
LRRC23	protein_coding	ENSG00000010626	12.6382	12.2217	12.1803	11.8563	9.77227	8.80064	8.45936	9.19519	14.5476	15.3652
BTK	protein_coding	ENSG00000010671	0.438842	0.304681	0.10469	0.124638	0.092186	0.081454	0.111589	0.105065	0.185537	0.084174
HFE	protein_coding	ENSG00000010704	0.008866	0.056354	0.005101	0.010226	0.023963	0.017854	0.0512	0.015582	0.021676	0.024387
SCMH1	protein_coding	ENSG00000010803	16.5131	16.0933	25.4893	25.1884	19.9095	20.7544	21.3301	19.2478	41.5286	41.2986
FYN	protein_coding	ENSG00000010810	18.6627	18.3424	19.27	16.7382	16.333	18.4708	17.5007	18.074	17.1886	18.266
HIVEP2	protein_coding	ENSG00000010818	18.8834	16.1049	9.52891	11.0735	12.148	12.9567	10.2807	10.2897	13.5353	12.1738
FMO1	protein_coding	ENSG00000010932	0	0	0	0	0	0	0	0	0	0
ELOA	protein_coding	ENSG00000011007	41.1622	45.5957	22.8933	27.3946	21.3697	25.0074	23.054	24.9954	38.5896	42.7589
LYPLA2	protein_coding	ENSG00000011009	53.5168	56.4033	78.0485	79.5958	79.7176	73.6168	72.3126	81.7615	31.1788	35.463
CLCN6	protein_coding	ENSG00000011021	10.161	9.59662	29.8159	28.2544	21.3201	19.0281	29.6457	27.694	24.0745	26.9745
MRC2	protein_coding	ENSG00000011028	91.9088	91.3237	219.227	214.845	298.788	371.462	231.384	249.252	96.247	108.921
NME1-NME2	protein_coding	ENSG00000011052	69.0785	59.9479	66.9428	69.2332	24.9148	62.5038	66.6091	65.577	54.6711	52.061
SLC6A7	protein_coding	ENSG00000011083	0	0	0	0	0.020934	0.006648	0.007237	0	0	0.006782
TSPAN9	protein_coding	ENSG00000011105	22.6919	19.9117	25.11	21.6081	32.838	32.4035	22.6812	31.0757	19.0665	22.9776
BTBD7	protein_coding	ENSG00000011114	17.2389	16.264	10.8006	11.0641	10.4145	12.2683	13.3057	14.3096	15.0701	17.1874
APBA3	protein_coding	ENSG00000011132	10.6396	10.9294	16.6793	14.819	12.558	11.2668	11.061	12.3576	10.6636	13.4404
MKS1	protein_coding	ENSG00000011143	16.5996	17.6167	26.2852	27.3481	22.7297	24.491	23.2426	27.4195	21.261	20.8257
ABHD5	protein_coding	ENSG00000011198	16.8101	16.2171	12.5118	19.0309	19.6534	24.0872	18.2118	14.3646	12.889	13.415
ANOS1	protein_coding	ENSG00000011201	30.0789	28.448	35.6006	36.5834	38.876	36.4028	34.2901	34.7608	32.9602	31.7256
AKAP8L	protein_coding	ENSG00000011243	47.3811	46.391	42.2077	35.9518	29.3805	29.1387	47.1388	49.7208	51.2064	51.7391
MBTD1	protein_coding	ENSG00000011258	9.6527	9.77126	7.34642	6.78336	8.45015	8.34195	8.94754	8.43472	9.09781	7.91894
UTP18	protein_coding	ENSG00000011260	105.08	88.1819	53.5388	55.0603	51.2449	53.2522	62.1855	64.282	115.977	111.663
RNF216	protein_coding	ENSG00000011275	69.1247	69.3934	59.2048	58.5363	66.7535	68.823	74.216	73.4671	94.9804	92.8731
TTC19	protein_coding	ENSG00000011295	9.86717	9.74657	10.7388	8.27865	10.0635	10.4786	9.61466	10.2147	8.25577	8.32607
PTBP1	protein_coding	ENSG00000011304	347.11	332.706	334.683	342.619	335.978	363.348	273.466	310.537	403.024	413.769
DPF1	protein_coding	ENSG00000011332	5.93261	5.19474	10.6714	8.23416	10.0519	10.6506	6.48682	7.32358	5.58977	6.67333
SYT7	protein_coding	ENSG00000011347	1.89591	2.0248	2.76194	3.33656	3.64842	3.60148	3.8706	3.14981	2.72727	2.73892
LARS2	protein_coding	ENSG00000011376	20.0512	16.5858	11.9919	13.0744	15.9021	11.537	17.4885	17.5806	20.6591	22.8321
PIK3C2A	protein_coding	ENSG00000011405	49.7862	43.5446	40.9706	49.6145	38.6378	44.0387	41.4823	46.4907	47.8132	53.2933
PLAUR	protein_coding	ENSG00000011422	156.4	153.876	110.454	100.677	201.995	251.6	150.311	160.763	88.0508	91.2906
ANLN	protein_coding	ENSG00000011426	139.024	129.475	260.687	279.467	259.428	261.006	395.222	395.05	433.448	385.105
WIZ	protein_coding	ENSG00000011451	16.0733	22.5344	21.9842	26.1064	21.813	21.4221	25.1043	29.6601	26.7575	24.8155
RABGAP1	protein_coding	ENSG00000011454	14.9942	15.3693	18.9173	19.977	14.4167	14.4251	21.549	18.7715	24.1452	24.1462
DCN	protein_coding	ENSG00000011465	0.086846	0.014957	0.03635	0.01512	0.007561	0.0242	0.010913	0.007934	0.010951	0
QPCTL	protein_coding	ENSG00000011478	12.3461	12.7632	25.8001	24.1624	22.972	20.9717	20.4728	23.8358	14.6347	14.2878
PPP5C	protein_coding	ENSG00000011485	82.393	87.751	87.6932	90.1329	83.9905	89.2875	91.6485	96.591	99.7786	98.5473
CEP68	protein_coding	ENSG00000011523	2.83218	2.47498	8.80802	8.3768	8.19134	8.8442	5.4175	6.60024	5.61472	4.75657
MAP4K3	protein_coding	ENSG00000011566	20.8085	21.7902	19.6183	20.5819	15.3983	23.2846	19.5561	21.948	24.1933	24.9216
ZBTB32	protein_coding	ENSG00000011590	0	0.005458	0	0	0.006243	0	0	0	0	0
TYROBP	protein_coding	ENSG00000011600	0	0	0	0	0	0	0.045249	0	0	0
TMEM159	protein_coding	ENSG00000011638	5.97286	5.39485	12.4893	10.954	5.53675	7.04946	6.09988	6.64597	6.19025	7.40733
GABRA3	protein_coding	ENSG00000011677	10.509	9.92479	9.77406	10.5274	10.5416	9.91216	9.89613	9.34072	13.7187	13.6309
BRCA1	protein_coding	ENSG00000012048	24.5263	22.1995	65.6585	73.3046	57.9098	59.1901	50.2697	65.8062	31.659	33.3642
ERCC1	protein_coding	ENSG00000012061	108.855	108.216	94.4286	94.1098	124.748	124.736	89.9622	110.178	108.631	114.048
CD22	protein_coding	ENSG00000012124	1.32605	1.09624	0.882564	1.5503	1.80674	1.65463	1.86249	1.75152	0.720277	1.0233
SEMA3B	protein_coding	ENSG00000012171	10.5558	8.09928	27.0015	17.6427	29.1239	21.5672	19.3643	17.274	8.44473	9.43907
MBTPS2	protein_coding	ENSG00000012174	7.74298	7.68465	10.8874	10.8152	12.4531	12.5221	10.7879	11.2347	8.63723	8.57975
PRICKLE3	protein_coding	ENSG00000012211	13.1232	13.3829	13.2629	13.866	16.6496	16.1388	16.4079	17.5628	10.0536	10.8875
LTF	protein_coding	ENSG00000012223	0.275188	0.267984	2.11603	2.76672	2.60311	3.03509	0.769118	2.90151	0.29793	0.350147
EXTL3	protein_coding	ENSG00000012232	42.7175	41.6745	23.3738	34.1722	38.3338	39.4682	35.0033	38.0131	43.7866	50.6737
NR1H4	protein_coding	ENSG00000012504	0	0	0	0.028004	0.067012	0.048094	0.028305	0.100501	0	0
ELOVL5	protein_coding	ENSG00000012660	244.777	218.118	241.291	231.272	234.875	248.335	279.786	268.027	278.474	255.507
ALOX5	protein_coding	ENSG00000012779	7.49077	7.97889	38.3831	39.2204	27.8412	26.9741	15.2521	15.416	8.44384	11.106
KDM5D	protein_coding	ENSG00000012817	0	0	0	0	0	0	0	0	0	0
CALCOCO1	protein_coding	ENSG00000012822	15.5655	14.5315	25.7432	24.4673	27.031	34.0915	32.8512	32.7646	13.0302	12.789
UBR7	protein_coding	ENSG00000012963	25.3694	23.5202	35.7239	35.6289	31.0286	37.5054	19.8812	19.6455	24.0164	22.5383
MAP4K5	protein_coding	ENSG00000012983	77.359	72.8053	56.9101	59.6073	60.3829	62.3919	63.8237	67.5808	81.2317	78.4531
EHD3	protein_coding	ENSG00000013016	12.1942	11.7982	9.43671	10.0088	12.1937	12.6347	11.7927	11.8517	12.1771	13.3705
PSMC4	protein_coding	ENSG00000013275	161.196	158.044	116.035	112.202	106.369	108.349	91.4051	98.1263	162.445	171.461
MAN2B2	protein_coding	ENSG00000013288	10.644	11.2615	18.3314	18.6319	15.1201	17.5909	16.2095	16.0396	10.8262	11.0719
SLC7A14	protein_coding	ENSG00000013293	0	0	0	0	0	0	0	0	0	0
CLDN11	protein_coding	ENSG00000013297	0.040875	0.160219	0.271007	0.309258	0.534425	0.261467	0.619382	0.855946	0.155621	0.11676
SLC25A39	protein_coding	ENSG00000013306	176.841	182.898	198.105	197.61	181.447	186.617	156.34	174.807	178.246	206.076
MVP	protein_coding	ENSG00000013364	62.1692	58.6897	71.6059	67.1079	60.819	62.9294	55.551	65.9925	70.9076	78.1345
NUB1	protein_coding	ENSG00000013374	23.9425	23.4788	18.4535	19.6735	15.3553	20.4927	20.3016	25.5525	21.8681	23.3177
PGM3	protein_coding	ENSG00000013375	12.2151	13.8338	19.8103	20.1824	15.5147	15.6711	12.1331	11.8102	10.265	8.8092
RWDD2A	protein_coding	ENSG00000013392	1.18586	1.01716	3.23886	2.943	1.86808	1.91797	1.15068	1.20226	0.765716	0.714389
CLK1	protein_coding	ENSG00000013441	31.2797	29.2647	37.0576	35.6023	33.9335	35.0839	47.4211	46.6718	44.713	37.1961
POLR3B	protein_coding	ENSG00000013503	12.1379	11.4585	8.69846	9.11498	9.31469	9.66596	14.3525	14.1828	16.2496	14.2589
ANGEL1	protein_coding	ENSG00000013523	7.17599	7.7199	13.9007	13.9754	11.7582	12.2244	10.0996	10.5742	7.74102	8.13314
RNF14	protein_coding	ENSG00000013561	14.4955	15.0814	20.9634	19.8929	14.861	16.6971	17.0687	15.8405	20.8226	23.1884
DNASE1L1	protein_coding	ENSG00000013563	14.4608	14.7277	30.579	21.474	27.8306	26.2964	24.5452	16.3561	17.8489	14.0336
DDX11	protein_coding	ENSG00000013573	36.5934	35.6107	49.9671	43.8215	41.4997	40.859	43.4993	49.895	30.3453	30.696
HEBP1	protein_coding	ENSG00000013583	32.3849	26.0348	54.9159	55.2988	37.8507	39.0803	29.0272	30.1184	29.7673	32.0404
GPRC5A	protein_coding	ENSG00000013588	39.9884	38.2106	45.2238	43.6516	49.3457	43.8673	33.7204	35.2797	11.9415	10.0429
MAMLD1	protein_coding	ENSG00000013619	8.76502	9.31255	7.73375	5.34621	14.962	15.235	13.1656	8.93797	7.51687	4.81252
CD6	protein_coding	ENSG00000013725	0	0	0	0	0	0	0	0	0	0
TACC3	protein_coding	ENSG00000013810	34.1262	32.2855	88.5808	93.0762	86.9838	83.3104	134.571	138.031	158.939	180.216
UFL1	protein_coding	ENSG00000014123	19.521	18.3138	20.3889	20.3481	21.6444	22.9055	16.5901	16.9242	15.7951	15.2348
POLA2	protein_coding	ENSG00000014138	11.7015	12.0629	47.7166	41.7378	30.6904	31.4176	21.4435	22.8656	17.4935	17.422
ZC3H3	protein_coding	ENSG00000014164	23.3474	26.1879	27.9491	25.3648	25.5325	22.1809	30.1911	29.8946	44.4873	50.7815
CAPN1	protein_coding	ENSG00000014216	49.7317	50.2173	58.8065	63.836	53.3229	55.0362	50.233	51.7074	65.5919	67.6574
ACPP	protein_coding	ENSG00000014257	0	0.011458	0.021608	0	0.036796	0.015803	0	0.297443	0	0
MDH1	protein_coding	ENSG00000014641	159.782	167.322	138.222	136.59	116.411	133.872	91.8306	98.6219	149.245	157.517
SLC30A9	protein_coding	ENSG00000014824	29.6143	32.2967	30.0339	28.5223	26.309	32.4821	22.8187	25.2156	38.0544	34.7741
MTMR11	protein_coding	ENSG00000014914	8.81034	8.47577	20.3585	17.5745	15.0554	15.7314	13.1247	14.933	9.3688	8.05679
COX15	protein_coding	ENSG00000014919	24.812	24.8962	34.3664	33.957	27.2511	27.2468	26.0831	27.1533	29.1843	30.6348
CCDC88C	protein_coding	ENSG00000015133	0.282012	0.330195	0.086144	0.043776	0.488119	0.521622	0.521545	0.72198	0.063603	0.237068
YAF2	protein_coding	ENSG00000015153	19.6882	25.7962	18.4285	21.6899	18.2872	18.841	15.2903	16.8828	21.25	18.9934
ZMYND11	protein_coding	ENSG00000015171	20.4287	20.6607	16.5981	15.9469	13.9588	15.9257	16.7702	16.5977	34.8118	31.9036
WAS	protein_coding	ENSG00000015285	0.23675	0.079415	0.298282	0.167767	0.256369	0.264711	0.294724	0.685838	0.017398	0.041145
DPEP1	protein_coding	ENSG00000015413	0	0	0.043724	0.045235	0.03519	0.054147	0.040412	0.118016	0	0
BID	protein_coding	ENSG00000015475	24.7598	24.7997	37.1513	37.1146	32.4102	35.285	24.2345	24.3349	30.8236	32.5189
MATR3	protein_coding	ENSG00000015479	105.566	97.9446	74.2531	82.0008	80.2421	91.8745	80.9876	81.4629	104.87	93.8754
NPC1L1	protein_coding	ENSG00000015520	0.09955	0.104436	0	0.019876	0.040463	0.004924	0.013491	0.049464	0.035368	0.066712
XYLT2	protein_coding	ENSG00000015532	15.8892	17.8058	27.4072	26.1208	26.6851	24.9504	34.494	35.6761	26.0642	25.9176
RGPD5	protein_coding	ENSG00000015568	17.8057	17.4893	17.2804	18.1286	22.5759	23.4249	22.2149	21.6799	14.8894	14.5772
STMN4	protein_coding	ENSG00000015592	0.119992	0	0.107016	0.034489	0.2505	0.165023	0.298659	0.422926	0.026179	0.016625
NUDCD3	protein_coding	ENSG00000015676	15.9651	41.2116	37.4343	38.7902	12.8076	21.1059	21.2699	34.3601	55.4783	49.2389
ISL1	protein_coding	ENSG00000016082	0.05536	0.083789	0.074571	0.093404	0.058437	0.02015	0	0.044171	0.018639	0
CHDH	protein_coding	ENSG00000016391	0.276613	0.228626	1.24523	1.1956	0.894394	1.0079	0.593352	0.514728	0.344657	0.6122
IL20RA	protein_coding	ENSG00000016402	0.230157	0.183755	0.09762	0.203163	0.202328	0.254784	0.083108	0.138648	0.057699	0.046597
CLCA1	protein_coding	ENSG00000016490	0	0	0	0	0	0	0	0	0	0
CLCA4	protein_coding	ENSG00000016602	0	0	0	0	0	0	0.016939	0	0	0
GLT8D1	protein_coding	ENSG00000016864	31.5899	32.2684	52.8765	41.1967	35.131	39.2006	29.5781	32.8269	42.3703	45.1466
ATP2C1	protein_coding	ENSG00000017260	46.0067	47.0962	52.2509	49.3893	44.6347	43.4377	48.9382	46.1483	48.9175	42.3787
IGF1	protein_coding	ENSG00000017427	0	0.003273	0.003664	0.010993	0.237162	0.119797	0.122863	0.216807	0.003167	0.003435
SLC38A5	protein_coding	ENSG00000017483	0.681141	0.516831	1.9091	1.1406	2.35394	1.29709	2.04637	2.25851	0.337032	0.615847
RALBP1	protein_coding	ENSG00000017797	114.288	109.098	103.919	111.133	95.6292	98.4358	99.1286	92.0246	151.321	154.487
RUFY3	protein_coding	ENSG00000018189	39.2089	38.7551	65.1684	50.8193	52.0107	50.0523	54.8741	56.391	56.9826	61.6325
CNTN1	protein_coding	ENSG00000018236	5.89548	6.26902	5.38889	5.43914	3.66585	4.18359	6.63851	6.14507	10.6254	6.31659
SLC11A1	protein_coding	ENSG00000018280	0.006104	0.036502	0.279297	0.240118	0.101763	0.304851	0.321086	0.300815	0.00605	0.017516
WWTR1	protein_coding	ENSG00000018408	50.4081	59.7928	24.7971	31.375	51.2718	49.9999	36.4782	36.6923	24.3461	22.5599
AGPS	protein_coding	ENSG00000018510	71.7025	54.468	44.7182	44.9424	57.8223	52.6164	55.6323	49.9262	65.0677	53.1104
ZNF806	unprocessed_pseudogene	ENSG00000018607	0.026242	0.025977	0	0	0.011644	0.013872	0	0	0.026186	0
CXorf56	protein_coding	ENSG00000018610	26.8488	25.122	16.757	16.5353	17.8091	20.4148	17.7206	18.2967	21.3628	21.2867
ATP1A2	protein_coding	ENSG00000018625	0.181407	0.152213	3.8684	3.53317	1.63478	1.63723	0.813382	0.727068	0.380406	0.377508
TTC27	protein_coding	ENSG00000018699	32.9928	32.5958	13.4376	13.9553	20.1955	21.3136	20.5599	22.6042	32.3429	29.9576
ZNF582	protein_coding	ENSG00000018869	3.5959	3.35905	2.20249	1.9298	1.96568	1.73643	2.46814	2.73495	3.10712	3.30693
VSIG2	protein_coding	ENSG00000019102	0	0	0.033962	0	0.030007	0.010158	0	0	0	0
PHLDB1	protein_coding	ENSG00000019144	40.9509	36.3267	81.0527	85.073	87.8037	86.943	84.0424	77.2324	53.7118	58.1703
MARCO	protein_coding	ENSG00000019169	7.76851	6.81608	20.2061	18.3502	29.1748	35.9398	43.0561	48.4273	7.00767	7.31522
CYP24A1	protein_coding	ENSG00000019186	10.8948	11.4982	29.7689	30.3782	150.068	154.133	93.8592	90.4296	19.0018	16.3199
PRDM11	protein_coding	ENSG00000019485	6.32643	7.22962	14.0197	16.3454	9.59308	9.67872	8.19809	8.70521	12.2218	11.8063
SYT13	protein_coding	ENSG00000019505	0.130008	0.12236	0.261973	0.363878	0.942972	0.816197	1.09343	1.57976	0.035277	0.044121
SNAI2	protein_coding	ENSG00000019549	40.5464	17.3291	19.237	5.66589	24.3143	26.7274	23.8879	20.4543	11.6958	3.58583
CD74	protein_coding	ENSG00000019582	0.020916	0.117169	0.225897	0.015649	0.352159	0.23734	0.615108	0.422398	0.013404	0.017501
HGF	protein_coding	ENSG00000019991	0.042224	0.09406	0.013467	0.009028	0.055336	0.052154	0	0.033552	0.003841	0
ZRANB1	protein_coding	ENSG00000019995	19.176	19.2683	22.6437	22.4303	15.0846	15.9723	22.3165	21.7312	32.7471	31.3437
NCDN	protein_coding	ENSG00000020129	22.4076	24.0628	29.1694	28.5649	28.2541	28.9906	23.1226	26.2838	23.5222	26.9572
ADGRA2	protein_coding	ENSG00000020181	4.63508	5.16312	13.3281	12.9817	11.0166	9.65347	6.28228	6.54305	5.96121	6.42106
CCT8L1P	processed_pseudogene	ENSG00000020219	0	0	0	0	0	0	0	0	0.027564	0
ZFP64	protein_coding	ENSG00000020256	38.4842	41.0908	34.2879	34.1551	30.1694	31.808	33.53	34.3565	39.8536	40.1987
MNAT1	protein_coding	ENSG00000020426	30.408	29.1065	25.21	26.0991	22.9471	25.92	29.1893	28.7157	44.1002	43.0735
SAMD4A	protein_coding	ENSG00000020577	22.6828	25.7301	44.8803	45.8674	28.6404	31.0784	31.6819	34.4512	48.2651	53.5134
RUNX3	protein_coding	ENSG00000020633	10.418	16.185	6.65817	7.7042	17.546	19.0069	9.02603	10.1544	2.77272	2.8259
MRE11	protein_coding	ENSG00000020922	28.7586	20.5049	36.6719	26.8	23.7706	23.4211	22.3609	21.5003	25.2087	26.9848
PLEKHB1	protein_coding	ENSG00000021300	1.90077	1.94741	2.40078	2.31351	2.29883	1.91539	1.72387	2.04204	1.25891	1.57994
SERPINB1	protein_coding	ENSG00000021355	10.9484	10.6764	16.6846	16.7283	21.48	24.4509	16.6999	18.5255	10.1946	11.2592
CYP3A43	protein_coding	ENSG00000021461	0	0	0	0	0	0	0	0	0	0
SLC7A9	protein_coding	ENSG00000021488	0.075882	0.018306	0.382775	0.104396	0.396861	0.196957	0.309723	0.341211	0.526605	0.356323
SPAST	protein_coding	ENSG00000021574	10.6727	9.1795	9.34637	10.5413	7.06331	10.1804	9.54124	9.55416	11.7896	11.1861
NRXN3	protein_coding	ENSG00000021645	2.11663	1.41614	6.17648	7.90498	7.39354	7.60401	8.96241	8.2597	4.19332	4.51456
OSBPL5	protein_coding	ENSG00000021762	9.04218	8.49765	25.9115	24.5364	17.4177	19.0884	19.0626	15.1991	25.9254	28.8549
AQR	protein_coding	ENSG00000021776	15.8283	15.7956	12.7096	13.7396	12.0003	12.0701	15.1225	15.543	16.0467	15.4395
CPS1	protein_coding	ENSG00000021826	14.1156	13.9235	13.9456	16.262	16.5838	14.5955	18.7666	20.0181	22.122	22.3261
C8B	protein_coding	ENSG00000021852	0	0	0	0	0.002417	0.059713	0	0.011552	0	0
FHL1	protein_coding	ENSG00000022267	47.7827	56.1584	76.3687	78.0693	63.3071	70.0337	52.6881	42.9158	77.6706	66.6115
RTF2	protein_coding	ENSG00000022277	97.3436	99.8374	67.0609	68.6824	61.6774	68.1244	62.8414	70.4717	104.583	100.486
GABRA1	protein_coding	ENSG00000022355	2.56641	3.74493	0.925771	0.689703	0.617296	0.756348	0.680117	0.868344	0.351919	0.296349
NLRP2	protein_coding	ENSG00000022556	4.71675	5.00409	5.8595	6.02995	3.48657	6.21568	6.40076	6.84225	5.17671	5.68375
SLC45A4	protein_coding	ENSG00000022567	10.1773	9.51222	7.36884	8.71412	8.84693	7.65584	7.82871	8.62398	9.98463	11.1177
RNF10	protein_coding	ENSG00000022840	63.3837	61.1722	49.0308	50.5159	39.9947	41.1503	42.3541	43.1437	69.0629	73.8714
ZNF839	protein_coding	ENSG00000022976	1.72386	1.7278	3.47829	3.22118	6.1976	6.18117	4.18975	4.7261	3.51475	3.26389
ZDHHC6	protein_coding	ENSG00000023041	65.4752	59.6179	87.7228	86.6313	63.2788	65.3054	62.812	65.7696	55.4449	52.5253
GRAMD1B	protein_coding	ENSG00000023171	28.3901	29.4469	9.41262	9.27944	29.8513	32.5499	23.893	27.7915	4.76796	5.1036
RNH1	protein_coding	ENSG00000023191	49.3645	47.0512	43.5732	44.8602	41.3535	43.4044	34.3381	38.7184	47.1955	56.01
NDUFS1	protein_coding	ENSG00000023228	50.6651	30.6107	43.5778	46.834	45.3819	48.339	25.3412	43.7643	46.5995	52.4245
RB1CC1	protein_coding	ENSG00000023287	48.1696	43.2646	26.8673	30.1909	23.2178	24.1552	28.869	27.5509	44.4402	44.5228
ERP44	protein_coding	ENSG00000023318	36.249	34.9183	39.4865	39.2471	40.9807	39.0055	37.4811	35.0166	33.1035	31.0802
ALAS1	protein_coding	ENSG00000023330	57.834	55.887	47.1289	47.2904	44.0833	49.7409	42.8426	45.177	56.4387	58.0971
BIRC3	protein_coding	ENSG00000023445	47.86	51.6793	2.52147	2.41697	30.5195	50.8763	2.31867	2.8166	3.4436	3.22426
AKAP11	protein_coding	ENSG00000023516	12.5421	12.9171	15.4796	16.6395	19.5862	19.5581	16.9252	17.2033	13.3492	12.7229
GLRX2	protein_coding	ENSG00000023572	10.4396	8.35898	9.58821	10.3103	9.62517	9.74465	6.70672	7.37549	7.00796	5.78766
SNAPC1	protein_coding	ENSG00000023608	146.962	144.663	353.078	357.387	318.271	374.472	345.338	387.771	410.901	394.188
DERA	protein_coding	ENSG00000023697	19.7518	17.0523	38.6386	33.2547	27.8082	30.7039	21.4811	18.8011	18.424	24.2904
STRAP	protein_coding	ENSG00000023734	347.465	336.245	169.279	168.166	177.925	205.376	207.656	203.532	348.662	332.494
ABCC2	protein_coding	ENSG00000023839	1.17104	1.00062	1.18777	0.78833	1.20195	1.25587	1.3683	1.10818	1.20904	1.22325
DEF6	protein_coding	ENSG00000023892	1.23346	1.43974	2.53328	2.67078	2.33107	2.54558	2.9674	3.37239	1.89639	2.24174
PLEKHO1	protein_coding	ENSG00000023902	39.9926	28.9199	43.9596	36.8887	35.7587	39.191	32.1489	26.67	43.4923	35.7491
GCLM	protein_coding	ENSG00000023909	15.9414	15.5332	17.155	17.0037	22.4596	24.8371	18.537	18.3343	21.5547	25.0746
UBR2	protein_coding	ENSG00000024048	13.5318	13.195	12.7461	14.2556	12.6437	11.9241	14.963	13.7875	11.3239	11.2213
EHD2	protein_coding	ENSG00000024422	9.64822	13.1531	30.205	28.4145	15.5665	19.3034	18.9445	18.4208	13.2296	13.7814
DEPDC1	protein_coding	ENSG00000024526	18.9018	17.2426	25.1532	25.3888	17.4036	19.5041	37.1073	46.8635	71.8577	66.7312
CCDC28A	protein_coding	ENSG00000024862	15.6653	13.9772	17.405	17.2395	13.4314	14.86	11.7695	11.8326	16.8067	14.729
RRAGD	protein_coding	ENSG00000025039	4.74966	4.53949	12.4119	12.4773	9.83735	10.3483	4.30806	4.31826	4.04291	4.23676
HSF2	protein_coding	ENSG00000025156	8.25564	7.5077	8.79819	9.66474	5.53823	6.93838	7.32622	7.07563	8.01716	7.74666
PHF20	protein_coding	ENSG00000025293	23.6206	21.4862	30.479	28.474	18.4615	23.5831	18.6647	21.5446	30.0093	30.571
HSD17B6	protein_coding	ENSG00000025423	1.28077	1.44288	2.7151	2.22979	2.13455	3.32717	1.87726	2.88024	1.81183	1.72424
NR1H3	protein_coding	ENSG00000025434	5.8292	6.04656	8.37411	8.9393	7.22849	8.47612	8.0097	8.49555	8.55079	7.07528
TYMP	protein_coding	ENSG00000025708	2.16755	1.66284	4.14826	3.79602	4.19696	3.81959	2.06591	2.42215	1.21511	1.52967
NCAPH2	protein_coding	ENSG00000025770	73.1693	68.3051	113.938	110.776	98.8824	99.8152	67.352	77.8367	73.1695	81.4999
TOMM34	protein_coding	ENSG00000025772	161.443	167.042	117.899	119.227	149.948	161.425	163.06	161.489	187.232	182.143
SEC63	protein_coding	ENSG00000025796	54.4586	53.2185	40.2299	40.5437	40.4014	41.8364	50.3125	49.2555	46.2248	41.5839
KPNA6	protein_coding	ENSG00000025800	28.9407	27.4794	17.7536	28.4079	26.0552	27.1748	27.4808	31.4079	24.8378	25.2522
VIM	protein_coding	ENSG00000026025	2324.44	2164.82	1434.8	1446.26	1381.41	1525.31	1571.76	1621.14	1929.27	1937.57
RTEL1-TNFRSF6B	protein_coding	ENSG00000026036	2.33157	1.60309	4.83491	4.03991	3.72124	3.62182	5.24387	5.80463	3.67791	4.83384
FAS	protein_coding	ENSG00000026103	38.9495	34.8912	40.4822	42.8296	34.0711	34.5908	37.1192	33.0053	13.7366	13.2631
RNASET2	protein_coding	ENSG00000026297	5.43509	6.07923	13.7725	12.0897	12.5247	11.4952	11.7413	9.85072	7.96973	4.78282
CD44	protein_coding	ENSG00000026508	142.226	147.558	107.645	86.3167	147.271	159.419	153.513	161.07	109.035	88.6949
KCNG1	protein_coding	ENSG00000026559	45.3479	42.734	58.6938	62.8888	84.1133	86.9203	49.9279	51.7206	47.8598	56.5225
AGPAT4	protein_coding	ENSG00000026652	4.05558	3.77951	6.4119	7.00958	7.34566	6.37907	6.61667	7.16942	4.8662	4.639
SLAMF7	protein_coding	ENSG00000026751	8.57782	9.18781	17.8578	16.2771	16.0833	16.3738	13.7395	14.7667	4.60384	5.13687
BTN3A1	protein_coding	ENSG00000026950	0.75633	0.726463	1.73537	1.59677	1.64232	1.66293	2.18532	2.39866	0.503517	0.735606
MIPEP	protein_coding	ENSG00000027001	11.5643	12.3311	11.9608	11.6412	10.3007	10.9889	8.48328	8.07545	9.96838	10.6711
PRKCH	protein_coding	ENSG00000027075	47.0547	43.7078	28.3458	34.4186	56.2265	44.7256	31.0136	34.2418	33.7933	30.9531
INSRR	protein_coding	ENSG00000027644	0.005353	0.027212	0.036695	0.043882	0.460458	0.350104	0.208	0.312622	0.004569	0.045103
IFNGR1	protein_coding	ENSG00000027697	33.3644	25.6582	27.8913	23.2509	23.3441	26.9402	21.3387	22.5702	27.3372	26.5127
B4GALT7	protein_coding	ENSG00000027847	10.0802	8.74416	15.2951	14.2136	14.3971	13.833	13.7606	15.4204	10.656	14.4074
SH2D2A	protein_coding	ENSG00000027869	1.69807	2.37493	2.34725	3.16422	34.0043	39.1751	18.7761	20.3416	0.231638	0.320271
VRK2	protein_coding	ENSG00000028116	56.5654	55.5504	71.6173	76.2661	69.8187	71.3307	70.1415	68.1241	80.8314	80.2375
TNFRSF1B	protein_coding	ENSG00000028137	0.074777	0.062721	0.277828	0.321365	0.579983	0.490239	0.136392	0.183607	0.031511	0.013771
VEZT	protein_coding	ENSG00000028203	14.0606	14.3251	19.8287	19.5991	15.5941	20.0057	27.3482	23.9581	19.8847	26.8935
POU2F2	protein_coding	ENSG00000028277	14.3124	15.7871	5.28787	3.45315	21.7714	22.768	5.3413	5.81987	2.27943	2.82086
BRD9	protein_coding	ENSG00000028310	37.0414	41.2874	23.5895	22.6477	37.7191	40.1918	45.026	48.0672	45.4478	46.1566
SNX1	protein_coding	ENSG00000028528	110.931	101.28	95.8076	90.862	82.3482	88.1568	79.0674	80.7483	120.884	126.008
TBPL1	protein_coding	ENSG00000028839	12.3613	11.4239	25.9356	20.2408	20.1409	21.5723	21.0816	29.5306	22.3622	23.0449
ARNTL2	protein_coding	ENSG00000029153	16.7045	16.5593	30.9179	31.2328	30.0219	32.8477	20.2093	20.4669	20.4579	20.1902
BCLAF1	protein_coding	ENSG00000029363	105.997	81.5128	44.6623	48.1585	46.8341	53.317	60.3433	67.9315	73.4904	79.9063
SLC39A9	protein_coding	ENSG00000029364	53.6029	46.753	50.8891	52.5592	41.758	40.3066	54.6327	43.9019	50.6585	43.6189
ANK1	protein_coding	ENSG00000029534	1.21621	1.02377	1.86458	1.69275	1.55454	1.48984	1.07735	1.42504	1.31667	0.944946
IBSP	protein_coding	ENSG00000029559	0.015208	0	0	0	0.028711	0.080071	0.085869	0.07054	0.014923	0.016294
TFB1M	protein_coding	ENSG00000029639	15.7628	15.3643	14.6172	14.2508	14.0347	14.5062	14.1763	14.4215	20.3901	18.8714
RABEP1	protein_coding	ENSG00000029725	21.7037	22.1792	23.2147	24.4029	28.3942	28.9924	25.4831	25.3934	34.8238	33.3244
HMGB3	protein_coding	ENSG00000029993	59.1503	63.7752	32.5642	32.4652	29.9903	35.5485	39.7643	39.0036	84.6439	82.6624
NUP160	protein_coding	ENSG00000030066	60.0427	58.4105	45.0142	48.898	51.3043	52.4753	48.5273	51.3962	49.7909	49.3304
BAK1	protein_coding	ENSG00000030110	51.9166	48.8692	37.7656	40.3944	57.2569	60.5208	47.422	54.4502	46.5258	51.4376
MUSK	protein_coding	ENSG00000030304	0	0	0	0	0.003763	0	0	0	0	0
IKZF2	protein_coding	ENSG00000030419	2.97156	2.29421	5.40652	5.56589	3.46245	3.23163	2.14617	1.8335	1.34779	0.755861
GRN	protein_coding	ENSG00000030582	89.6439	70.5316	122.364	161.546	149.741	150.479	100.675	129.93	70.7113	62.0755
FAM13B	protein_coding	ENSG00000031003	18.0772	17.2447	18.35	17.9648	18.5726	21.8793	24.613	24.4336	26.7304	25.6221
ARHGAP31	protein_coding	ENSG00000031081	11.2158	11.3994	15.7898	18.0499	19.2776	20.2489	19.2155	17.7419	13.8195	14.5597
CENPQ	protein_coding	ENSG00000031691	11.2501	9.97665	20.0337	22.613	18.2388	21.7502	13.7017	12.9038	11.8373	12.5206
SARS	protein_coding	ENSG00000031698	331.464	316.322	348.061	350.259	323.742	362.328	263.488	279.818	315.18	319.004
RANBP3	protein_coding	ENSG00000031823	36.7972	36.6681	33.3447	35.2237	35.2933	33.7759	37.098	37.2387	54.0768	59.5697
ARID4A	protein_coding	ENSG00000032219	15.1337	13.4765	25.3628	22.187	19.1214	15.238	18.7361	17.9457	15.6159	12.4744
EIPR1	protein_coding	ENSG00000032389	14.0549	11.7958	9.94556	10.1323	8.70412	9.22492	9.65978	7.25009	14.2204	14.7647
PNPLA6	protein_coding	ENSG00000032444	28.003	32.062	54.9802	49.5132	39.0441	32.0868	29.7173	34.1106	34.7386	39.0478
IFT88	protein_coding	ENSG00000032742	6.67437	5.96635	6.22706	5.73628	4.38346	5.06388	3.70493	4.2338	8.46875	8.08676
ALG1	protein_coding	ENSG00000033011	24.8095	21.2877	20.0838	20.4069	22.6591	19.2641	22.7178	23.9776	19.4847	21.0576
ZCCHC8	protein_coding	ENSG00000033030	22.7975	22.5036	34.7355	30.5989	25.1645	25.5828	38.0199	37.3118	28.305	28.5412
ABCF2	protein_coding	ENSG00000033050	38.2696	37.7158	26.3199	26.1927	30.5563	30.9481	29.03	34.8319	40.073	40.3426
CHPF2	protein_coding	ENSG00000033100	8.82916	9.24316	5.95637	6.88806	8.75482	7.92564	7.12155	7.89086	4.39786	5.34511
LRRC7	protein_coding	ENSG00000033122	0.2435	0.196995	1.01417	0.685653	0.388386	0.426952	0.196569	0.172343	0.140458	0.137847
FUT8	protein_coding	ENSG00000033170	34.7507	33.1612	52.4074	53.4413	50.0788	48.3812	47.1346	46.3007	64.6162	63.439
UBA6	protein_coding	ENSG00000033178	28.3827	26.7681	27.6059	28.3728	24.3924	25.5509	31.4244	30.6171	32.0892	32.4441
GAB2	protein_coding	ENSG00000033327	6.52656	6.55565	12.6157	13.0676	7.87314	7.9391	6.83134	7.19029	9.1885	9.51267
ATP6V0A1	protein_coding	ENSG00000033627	0.475712	0.714278	1.76358	1.13659	0.761142	1.20322	0.911669	0.875116	0.214325	0.409007
PIAS1	protein_coding	ENSG00000033800	13.1324	13.5071	18.0754	17.1206	13.3811	12.6088	20.6274	18.7901	15.4277	15.6405
SLC4A7	protein_coding	ENSG00000033867	21.7571	22.6557	20.7704	20.9838	21.5951	22.4906	31.0918	27.1401	22.9914	19.512
APBA2	protein_coding	ENSG00000034053	9.80557	9.14085	18.4948	15.1296	15.659	21.59	11.3378	12.1514	14.9622	16.3274
MAP2K3	protein_coding	ENSG00000034152	207.778	235.046	63.447	63.2885	156.776	172.796	50.2326	56.35	74.2346	84.747
EFCAB1	protein_coding	ENSG00000034239	0.38484	0.11617	0.207889	0.203101	0.375198	0.61233	0.468595	0.258355	0.066737	0.171931
TMSB10	protein_coding	ENSG00000034510	3187.2	2975.47	2571.16	2735.54	2655.9	2746.19	2004.79	2400.13	3121.61	3214.9
ASTE1	protein_coding	ENSG00000034533	4.39275	4.32334	5.75507	3.67607	2.67148	3.25779	2.70536	2.82908	2.81205	2.54644
RNF19A	protein_coding	ENSG00000034677	38.7693	39.8448	33.5687	33.0648	26.7962	27.3057	29.8693	29.1573	31.4802	32.5093
PEX3	protein_coding	ENSG00000034693	32.1057	31.1158	31.8512	32.8101	29.4439	33.5714	24.0444	27.1711	36.1349	35.1545
GABARAPL2	protein_coding	ENSG00000034713	109.985	98.222	107.424	108.954	86.828	96.7706	75.5724	75.4865	91.992	89.3726
MYOC	protein_coding	ENSG00000034971	0	0	0	0	0	0	0	0	0	0
SH3YL1	protein_coding	ENSG00000035115	4.79837	3.81703	2.97546	2.68907	3.23056	2.83952	3.75984	3.13272	2.78274	3.07454
FAM136A	protein_coding	ENSG00000035141	135.625	127.217	111.433	109.965	118.798	136.59	118.444	125.14	136.299	133.641
VCL	protein_coding	ENSG00000035403	51.3165	46.0347	69.5803	65.2239	96.0124	96.936	78.9396	77.5424	77.2526	72.9326
DEPDC1B	protein_coding	ENSG00000035499	30.7905	29.4756	29.5619	30.4696	27.1186	30.3574	35.1841	36.7762	83.1802	85.5626
DAPK2	protein_coding	ENSG00000035664	0.765254	1.10431	3.78545	3.68507	1.92879	2.41408	2.06593	2.7468	1.34467	1.206
NSMAF	protein_coding	ENSG00000035681	36.2931	38.0891	33.6421	33.7973	35.0505	39.0783	28.9946	30.7379	45.475	43.7443
ADSS	protein_coding	ENSG00000035687	33.3256	32.4717	36.1029	39.3602	38.7493	43.0017	40.4516	40.8607	54.2186	53.8714
STAP1	protein_coding	ENSG00000035720	0	0	0	0	0	0	0	0	0	0
TIMP2	protein_coding	ENSG00000035862	107.239	39.9976	214.58	206.208	80.0698	74.6642	208.236	199.332	103.649	39.2872
RFC1	protein_coding	ENSG00000035928	69.6936	68.1156	66.5844	74.1831	54.7296	60.2899	63.545	65.2186	105.73	99.1073
TBC1D23	protein_coding	ENSG00000036054	28.1433	36.7622	21.3564	28.8905	20.3438	23.7711	23.2901	29.8909	36.7559	32.5974
CUL3	protein_coding	ENSG00000036257	69.6478	64.7089	26.0354	31.9423	29.9036	25.2549	35.7069	33.7786	76.9767	71.5075
MYOM2	protein_coding	ENSG00000036448	6.20269	5.21102	4.76248	6.47961	5.91501	4.61667	4.6393	4.11352	4.85896	4.79027
OTC	protein_coding	ENSG00000036473	0.014735	0.029226	0	0	0.003247	0	0	0.017302	0	0.007946
CYP46A1	protein_coding	ENSG00000036530	0.082492	0.096858	0.149698	0.168366	0.206047	0.09718	0.1135	0.055523	0.013928	0.030594
AC118549.1	protein_coding	ENSG00000036549	30.5062	29.3189	19.2761	24.4129	20.0552	20.2946	26.8213	28.5584	56.9604	49.0879
SLC18A1	protein_coding	ENSG00000036565	0	0	0	0	0	0	0	0	0	0
USP2	protein_coding	ENSG00000036672	0.185513	0.168217	1.11882	0.891406	0.662802	0.966979	0.119779	0.222816	0.083718	0.040249
CASR	protein_coding	ENSG00000036828	0.004575	0	0	0	0	0.012743	0	0	0	0
TUBG2	protein_coding	ENSG00000037042	6.41216	6.42929	14.0926	13.4397	10.7113	10.378	8.85289	8.53756	8.24476	9.14903
RPL26L1	protein_coding	ENSG00000037241	114.148	110.423	79.7076	85.4033	105.103	128.694	75.0822	92.1314	99.9545	93.581
FLT4	protein_coding	ENSG00000037280	4.96006	4.62837	13.1386	11.9387	10.8574	10.4457	6.84616	6.49721	6.62033	7.89228
NSUN2	protein_coding	ENSG00000037474	175.378	182.879	113.145	109.658	140.648	159.735	183.792	196.975	213.256	217.931
FBXO42	protein_coding	ENSG00000037637	2.53516	2.49319	7.07132	6.98846	7.00955	6.67095	5.95805	6.00625	5.33996	5.54386
MFAP3	protein_coding	ENSG00000037749	45.3621	42.7483	37.2819	37.5808	40.3994	39.7652	40.1523	42.4204	38.1538	42.7329
MRI1	protein_coding	ENSG00000037757	11.6246	12.0222	27.8639	24.2339	17.1639	15.7696	14.8759	14.4665	8.93835	10.4916
METTL1	protein_coding	ENSG00000037897	21.842	23.4884	22.7606	17.8148	24.233	26.4366	26.0471	33.2537	20.6663	22.413
HOXC8	protein_coding	ENSG00000037965	25.2677	27.6986	16.6538	16.3089	15.6282	17.1583	15.1761	15.8158	12.3284	11.7364
AGA	protein_coding	ENSG00000038002	19.9991	21.0892	22.6224	25.2471	27.5975	28.0124	23.0322	23.265	17.0091	9.73025
PI4K2B	protein_coding	ENSG00000038210	3.39837	3.32787	8.6716	8.90057	7.407	8.66902	5.04991	5.16243	6.12753	6.04597
BOD1L1	protein_coding	ENSG00000038219	32.0733	32.8424	21.3458	21.7517	25.631	28.3226	35.0481	35.0448	26.5908	24.2154
MAT2B	protein_coding	ENSG00000038274	40.3933	39.0556	32.4667	33.098	28.8108	31.1542	25.7991	26.6956	44.3204	44.6135
TLL1	protein_coding	ENSG00000038295	0.238209	0.145014	0.67715	0.45737	0.460287	0.865648	0.615053	0.457333	0.078855	0.092608
EDC4	protein_coding	ENSG00000038358	39.8003	40.7936	51.7942	47.8357	47.8324	51.5679	55.4158	54.8874	48.8538	50.3105
TRIO	protein_coding	ENSG00000038382	112.272	113.083	77.8719	97.8892	124.857	131.971	149.864	157.1	222.069	215.27
VCAN	protein_coding	ENSG00000038427	0.070521	0.191137	0.044598	0.059693	0.328285	0.177528	0.224361	0.321979	0.075171	0.05261
CLEC16A	protein_coding	ENSG00000038532	27.2976	26.3983	26.6616	27.5697	29.1307	29.9764	31.1045	28.4072	41.3088	42.9997
MSR1	protein_coding	ENSG00000038945	0	0.040343	0.522083	0.417089	0.412891	0.338675	0.268883	0.435617	0.071069	0.01346
CDH1	protein_coding	ENSG00000039068	0.703916	0.677496	3.97963	5.78325	6.63177	5.76825	3.37711	3.56973	1.39234	1.27754
MTREX	protein_coding	ENSG00000039123	85.7365	77.5876	48.7243	60.8899	45.6956	50.4728	61.4137	58.892	85.7961	89.0296
DNAH5	protein_coding	ENSG00000039139	0.193207	0.158163	0.731418	0.546612	0.603526	0.714275	0.431793	0.595053	0.376172	0.420211
ZFYVE16	protein_coding	ENSG00000039319	14.8331	13.3279	19.0715	21.7298	17.4216	18.1841	20.1396	20.1684	17.4562	16.8337
RIPOR1	protein_coding	ENSG00000039523	45.941	51.1526	63.8866	63.9395	58.4018	58.7366	64.7442	63.1434	82.8175	82.2997
C6	protein_coding	ENSG00000039537	0	0	0	0	0	0	0	0	0	0
RAI14	protein_coding	ENSG00000039560	85.0228	86.344	87.1358	74.9143	99.5883	101.856	99.7612	104.167	145.523	151.348
SOX30	protein_coding	ENSG00000039600	0.03579	0.007328	0.016243	0	0.020472	0.060119	0.020803	0.020816	0.028432	0
PNKP	protein_coding	ENSG00000039650	36.2019	34.898	44.9054	39.2265	51.3956	43.4846	53.2738	59.2604	36.3869	38.2051
BEST2	protein_coding	ENSG00000039987	0.223125	0.429485	0.08439	0.128562	0.39939	0.196986	0.177764	0.252585	0.217925	0.323426
PHLPP2	protein_coding	ENSG00000040199	19.8018	19.9311	18.3449	17.2183	16.1941	16.2576	20.5398	16.8485	21.0016	28.7187
SPDL1	protein_coding	ENSG00000040275	30.2963	28.6902	36.7748	38.049	37.6269	42.9746	62.4565	64.5814	77.9888	74.9935
STAU2	protein_coding	ENSG00000040341	30.9769	32.8984	46.691	50.8849	41.9304	47.1973	39.5482	41.8372	44.4691	42.523
PQLC2	protein_coding	ENSG00000040487	10.2055	11.1511	25.6451	23.9482	27.3911	27.0509	19.2106	20.7034	10.8787	13.7473
CTNS	protein_coding	ENSG00000040531	6.8076	7.184	12.2868	11.5525	8.33965	8.14117	10.6189	11.6	7.76641	9.17954
RTN4R	protein_coding	ENSG00000040608	6.72732	7.35129	29.4219	21.3336	14.5331	17.4472	12.1393	9.82476	10.276	12.1272
PHF23	protein_coding	ENSG00000040633	72.1776	72.295	55.0086	51.8571	87.9201	58.7726	76.9504	86.6901	67.1056	67.6485
CDH10	protein_coding	ENSG00000040731	0.844682	0.306185	1.44581	1.57873	0.781644	0.586075	0.925627	0.911645	0.134327	0.225048
INPP4A	protein_coding	ENSG00000040933	11.8541	11.4221	18.7309	24.6588	20.2313	21.6514	20.5589	19.0937	20.2458	21.1914
RAB27B	protein_coding	ENSG00000041353	0.65424	0.654584	0.959835	1.09232	0.665791	0.70474	0.636767	0.614466	0.289965	0.309244
PSMA4	protein_coding	ENSG00000041357	182.218	188.754	116.699	185.712	165.475	130.364	165.807	144.435	246.07	162.548
MYO16	protein_coding	ENSG00000041515	0.888541	0.840955	2.2102	2.31999	0.897454	0.949961	0.904292	1.41564	1.37615	1.26724
LSG1	protein_coding	ENSG00000041802	87.7713	84.764	61.9705	60.5308	73.513	73.7694	89.7892	93.4208	74.8579	76.896
PARP3	protein_coding	ENSG00000041880	10.0841	9.55373	25.868	23.0587	24.7777	25.3334	22.56	24.9713	12.4138	11.0173
TNC	protein_coding	ENSG00000041982	183.55	180.122	97.0653	118.605	160.011	167.162	155.478	164.61	115.318	122.898
THAP3	protein_coding	ENSG00000041988	10.368	9.55831	10.1089	7.92427	6.48616	5.19497	8.06946	8.75404	15.8453	16.2969
RIPOR3	protein_coding	ENSG00000042062	0	0	0.024561	0.060451	0.099826	0.027562	0.031969	0.023512	0.005324	0.004138
TDP1	protein_coding	ENSG00000042088	21.1849	18.0535	17.9874	17.3431	14.0373	17.8708	16.5348	16.6563	32.2939	29.359
AIFM2	protein_coding	ENSG00000042286	33.9243	31.5059	38.5092	35.6533	30.3601	33.4138	28.5792	30.38	42.569	48.3072
C2orf83	protein_coding	ENSG00000042304	0	0	0	0	0	0	0	0.038713	0	0
SPATA7	protein_coding	ENSG00000042317	2.96414	3.69561	6.85384	5.59004	3.75192	4.45132	4.66783	4.94324	4.36619	4.10313
MED17	protein_coding	ENSG00000042429	27.868	24.9765	26.959	20.3371	23.9103	25.0764	26.4857	29.6425	23.8285	24.1413
RETSAT	protein_coding	ENSG00000042445	15.5867	14.2253	30.4737	31.5547	21.1169	31.6525	25.8467	28.0854	16.1514	14.5738
CAPG	protein_coding	ENSG00000042493	20.7086	16.2733	44.0571	42.7573	37.896	42.503	28.4771	30.6531	27.4033	24.9617
AP2S1	protein_coding	ENSG00000042753	170.227	167.932	215.785	207.784	189.027	180.877	142.678	137.135	162.979	188.053
USH2A	protein_coding	ENSG00000042781	0.0032	0.013244	0.007459	0.01392	0.016884	0.014801	0.005025	0.023339	0.002242	0.004006
ZPBP	protein_coding	ENSG00000042813	0	0	0	0	0	0	0	0	0	0
TG	protein_coding	ENSG00000042832	0.091264	0.096731	0.303648	0.182286	0.310964	0.212607	0.510663	0.577671	0.031501	0.097542
ADAM28	protein_coding	ENSG00000042980	0.051475	0.05382	1.47042	1.24864	0.667651	1.02772	1.74682	0.915	0.036945	0.025747
BARX2	protein_coding	ENSG00000043039	1.09755	0.856446	0.374234	0.373228	0.571191	0.476189	0.371496	0.305175	0.317609	0.588663
DCUN1D1	protein_coding	ENSG00000043093	9.42224	9.36488	13.0448	13.0555	10.4278	10.9683	10.2758	9.77759	14.215	12.8773
JADE2	protein_coding	ENSG00000043143	32.0798	29.826	26.7469	29.5734	32.6162	31.5522	39.0504	42.1611	49.6125	58.4053
ZIC2	protein_coding	ENSG00000043355	0.047134	0.02258	0.029922	0.058937	0.035961	0.012472	0.017473	0.027581	0.023307	0
LCP2	protein_coding	ENSG00000043462	0.045266	0.022534	0	0	0.10578	0.044691	0.063798	0.21288	0.022726	0.042167
TRIT1	protein_coding	ENSG00000043514	32.6742	31.1354	23.1793	21.8248	24.3641	25.2762	25.1786	24.7952	31.557	26.1766
ADRB1	protein_coding	ENSG00000043591	0.018927	0.042013	0.065596	0.009441	0.078771	0.112481	0.008339	0.007394	0	0
GUCA2B	protein_coding	ENSG00000044012	0	0	0	0	0	0	0.045173	0	0	0
CUL7	protein_coding	ENSG00000044090	10.6748	10.9271	19.4419	19.6819	17.0873	16.2367	18.7384	21.4274	15.5434	16.014
CTNNA1	protein_coding	ENSG00000044115	227.663	221.654	122.174	126.918	142.222	147.918	140.195	145.321	193.775	200.868
PHKA2	protein_coding	ENSG00000044446	7.3584	9.54612	14.5926	15.0107	13.1797	13.0797	13.3292	15.4794	11.4052	10.9153
CNTLN	protein_coding	ENSG00000044459	2.08315	2.38902	5.2623	5.66419	3.96134	4.9669	3.3971	3.42059	4.27998	4.02075
EPHA3	protein_coding	ENSG00000044524	0.020089	0.012383	0.1241	0.192163	0.105116	0.067838	0.116079	0.05381	0.020019	0
HSPA5	protein_coding	ENSG00000044574	626.814	580.964	457.989	440.654	589.017	587.091	610.518	580.44	509.143	487.613
DSG2	protein_coding	ENSG00000046604	48.1017	46.3416	50.4146	51.9246	44.1994	42.2537	29.7966	28.9938	35.3413	37.442
GEMIN8	protein_coding	ENSG00000046647	3.34648	3.42045	3.05984	2.61184	1.86803	1.71987	2.54846	3.20673	4.2043	4.26309
OFD1	protein_coding	ENSG00000046651	8.83851	8.56058	11.3032	11.9759	8.56005	9.51984	9.81756	11.2655	11.1172	11.1945
GPM6B	protein_coding	ENSG00000046653	0.532628	0.664017	1.02079	1.01286	0.983276	1.12954	0.754797	0.591368	0.682329	0.522245
MAGEC2	protein_coding	ENSG00000046774	0.093607	0.046533	0.135079	0.145277	0.180997	0.111864	0.243631	0.07661	0.128364	0.088053
PREX2	protein_coding	ENSG00000046889	0.128823	0.085903	0.394839	0.357014	0.388308	0.440225	0.29477	0.379161	0.113266	0.142569
WDR37	protein_coding	ENSG00000047056	3.10179	2.96659	3.87017	4.4288	3.11565	3.36037	4.00057	3.95962	3.76055	4.69024
YTHDC2	protein_coding	ENSG00000047188	14.0561	13.0956	17.552	18.5878	14.2894	15.0314	15.488	13.4435	13.648	14.438
CTPS2	protein_coding	ENSG00000047230	1.99168	1.69195	5.27046	5.01988	3.44891	3.53849	2.58975	2.69496	3.15642	3.27235
ATP6V1H	protein_coding	ENSG00000047249	16.7716	16.6397	20.1915	16.5431	11.5843	14.7673	15.8008	15.8367	15.9415	16.7362
POLR2B	protein_coding	ENSG00000047315	162.58	152.207	137.475	131.575	133.07	146.449	169.755	170.008	168.981	165.382
FAM214A	protein_coding	ENSG00000047346	4.79988	4.80195	5.40677	5.77973	2.3003	2.76701	2.75436	2.34037	1.20344	1.28495
ARAP2	protein_coding	ENSG00000047365	26.9619	27.3594	22.5164	25.9781	23.4979	27.3675	19.7512	18.5596	20.6437	20.0609
TPR	protein_coding	ENSG00000047410	58.5096	53.7103	62.0905	62.8845	61.706	59.1712	81.7201	79.2752	73.5389	74.4886
CP	protein_coding	ENSG00000047457	0.166325	0.279166	0.193588	0.501298	0.11966	0.315217	0.110079	0.175523	0.014918	0.016179
KIAA0556	protein_coding	ENSG00000047578	10.0328	9.09828	15.6103	15.4625	14.8348	15.2337	15.801	16.7307	19.0061	20.7489
DTNBP1	protein_coding	ENSG00000047579	13.2691	13.4316	13.1366	13.9447	11.0545	9.90322	8.1376	9.15881	18.2696	15.8813
XK	protein_coding	ENSG00000047597	0.723534	0.587303	1.60933	1.81978	1.43287	1.76806	0.883851	0.904349	0.805077	0.800293
ANO2	protein_coding	ENSG00000047617	14.3458	13.694	39.8129	38.8433	45.7377	40.3291	33.7086	33.2315	30.9625	33.1047
C12orf4	protein_coding	ENSG00000047621	20.5563	20.9419	19.2564	21.5635	21.2306	23.6485	21.6981	20.3242	20.066	20.4205
SCML1	protein_coding	ENSG00000047634	20.9104	13.3819	19.8183	18.4156	21.5791	24.4925	15.2962	11.343	10.6757	10.491
WWC3	protein_coding	ENSG00000047644	8.82997	8.17123	7.02795	6.80525	7.11146	7.58643	5.74898	4.9658	6.55099	6.02629
ARHGAP6	protein_coding	ENSG00000047648	0.225047	0.442241	1.23591	1.4671	0.777186	0.787276	0.668018	0.769591	0.593667	0.634028
FAM184B	protein_coding	ENSG00000047662	0.013717	0.023096	0.026252	0.03839	0.010234	0.011099	0.048555	0.0578	0.087571	0.096337
MAP4	protein_coding	ENSG00000047849	101.096	103.366	95.0069	97.0575	100.589	97.1762	111.235	109.266	159.032	166.432
GOPC	protein_coding	ENSG00000047932	19.1878	17.6885	48.7534	23.89	32.3955	34.1114	39.2547	38.638	43.0839	21.4536
ROS1	protein_coding	ENSG00000047936	0.807036	1.05223	4.92001	4.81247	7.53793	7.34734	13.109	12.8565	1.77199	1.92352
USP28	protein_coding	ENSG00000048028	32.9377	34.3651	50.9461	60.3746	29.8978	32.7784	38.5491	39.1194	54.1822	49.1257
HDAC9	protein_coding	ENSG00000048052	36.4971	28.2091	15.9043	10.7304	10.952	17.9709	7.40809	7.72394	9.69845	7.46492
TSPAN17	protein_coding	ENSG00000048140	54.1922	46.1086	46.2351	46.8321	54.7586	54.415	42.3996	46.2123	54.142	58.5848
NOP16	protein_coding	ENSG00000048162	114.264	109.571	73.6574	68.8877	91.4454	101.804	97.7015	106.193	124.071	133.623
CC2D2A	protein_coding	ENSG00000048342	13.0291	14.4336	9.26529	8.03186	6.93731	8.07723	9.94229	12.6449	13.4883	14.148
RRM2B	protein_coding	ENSG00000048392	90.8514	89.8544	98.3908	100.006	67.3141	68.0509	72.501	67.5813	52.0725	46.8506
ZNF800	protein_coding	ENSG00000048405	17.7603	8.54834	20.7102	19.2548	8.13744	7.72091	9.25451	20.7372	8.39719	22.5859
TNFRSF17	protein_coding	ENSG00000048462	0	0	0	0	0.029295	0.025007	0	0	0.046812	0
SNX29	protein_coding	ENSG00000048471	1.71766	1.24597	4.17142	4.59005	3.21681	3.39265	3.55801	3.35913	4.61226	4.75713
LMO3	protein_coding	ENSG00000048540	0.077386	0.018404	0.091639	0.067215	0.143424	0.039928	0.034762	0.082744	0.095351	0.03715
MRPS10	protein_coding	ENSG00000048544	54.5991	54.7942	60.1564	59.2742	48.1983	56.7054	46.0748	48.7986	74.7448	77.8788
GUCA1A	protein_coding	ENSG00000048545	0	0	0.01752	0	0	0	0	0	0	0
RSF1	protein_coding	ENSG00000048649	28.0338	23.2105	28.605	28.5577	24.6201	27.4264	34.1466	33.2235	33.6217	31.6053
VPS13D	protein_coding	ENSG00000048707	13.0998	13.9085	16.2441	18.2263	14.9667	14.2958	12.1313	17.9145	21.3226	21.0881
CELF2	protein_coding	ENSG00000048740	1.44209	2.27636	1.7785	1.66878	1.03168	1.41303	1.19486	1.09904	1.21742	1.04643
FAM120A	protein_coding	ENSG00000048828	101.236	102.838	79.529	83.7725	74.4581	73.6564	73.4919	72.1124	116.816	120.826
R3HDM1	protein_coding	ENSG00000048991	39.7838	42.9906	36.5255	41.5625	30.8645	32.4782	37.1448	29.2228	70.4122	52.5951
COL9A2	protein_coding	ENSG00000049089	13.4	12.4502	32.793	27.445	28.6692	29.7004	22.6526	25.1	13.1822	14.8839
KITLG	protein_coding	ENSG00000049130	19.4062	20.4737	5.27186	6.72011	22.9515	27.8274	7.78104	5.75511	4.20234	3.92155
ERCC8	protein_coding	ENSG00000049167	16.0721	16.2789	14.1604	15.5129	14.3083	15.9325	14.0858	15.0454	20.2387	20.7848
ADAMTS6	protein_coding	ENSG00000049192	35.0203	28.3788	26.3746	25.8626	28.7697	34.1002	22.7211	22.4241	19.7265	25.0629
H6PD	protein_coding	ENSG00000049239	3.07094	3.16953	6.67426	7.49193	19.7097	17.5824	10.4697	8.37103	3.25095	3.29839
VAMP3	protein_coding	ENSG00000049245	76.4248	72.6567	66.6826	66.2816	71.3885	77.7035	72.9509	75.7046	74.1624	76.8636
PER3	protein_coding	ENSG00000049246	11.5684	12.3932	12.8303	13.5724	8.51973	9.28099	9.21192	9.11867	15.4661	15.9515
UTS2	protein_coding	ENSG00000049247	0	0.035265	0.03335	0.016825	0.116495	0.068346	0	0	0.034304	0
TNFRSF9	protein_coding	ENSG00000049249	10.5014	10.7817	8.65966	8.69008	20.1402	18.0887	6.60107	8.19388	3.50526	2.36121
EPN3	protein_coding	ENSG00000049283	0.359674	0.46249	2.22438	2.39636	0.817082	0.695125	0.585795	0.627418	0.192731	0.063948
LTBP1	protein_coding	ENSG00000049323	26.2496	25.0713	49.8306	56.8559	69.5168	59.2066	59.513	56.0816	23.2058	21.1157
RCN1	protein_coding	ENSG00000049449	371.186	351.879	388.555	365.108	413.181	426.504	429.967	383.136	308.197	313.854
ELN	protein_coding	ENSG00000049540	0.005927	0.012102	0.070152	0.01358	0.082904	0.147014	0.037833	0.050107	0	0.00929
RFC2	protein_coding	ENSG00000049541	62.5349	62.2856	81.935	84.8527	61.7638	71.1189	44.1734	48.5599	52.678	56.3474
ARID1B	protein_coding	ENSG00000049618	16.2096	18.4401	21.7902	24.434	21.0778	21.1893	22.2801	26.7829	32.3369	31.0673
CLPTM1L	protein_coding	ENSG00000049656	803.97	778.965	1049.74	1048.17	790.32	792.784	593.619	653.403	990.575	999.635
NEDD4L	protein_coding	ENSG00000049759	141.239	110.261	57.2759	49.7066	45.1504	56.026	97.2674	119.036	112.677	149.944
FOXP3	protein_coding	ENSG00000049768	0.621699	1.07385	0.990831	1.08863	2.4071	2.50752	2.36749	2.10406	0.966295	0.947157
PPP1R3F	protein_coding	ENSG00000049769	1.01652	0.947747	1.87614	1.40872	2.85281	3.286	1.29295	1.64395	0.694802	0.988038
HEXB	protein_coding	ENSG00000049860	29.46	35.0736	45.4289	33.4476	41.1952	32.4017	34.6143	28.4303	29.2185	29.4358
PTCD2	protein_coding	ENSG00000049883	5.83381	5.74594	4.60959	4.03011	4.25255	4.41068	4.99304	4.95804	4.53337	3.86253
NEXMIF	protein_coding	ENSG00000050030	0.066823	0.058588	0.468045	0.836699	0.215464	0.2458	0.088812	0.110925	0.064244	0.105111
JKAMP	protein_coding	ENSG00000050130	51.3678	65.0876	66.3469	62.1735	63.0611	62.539	68.1072	68.0784	75.7346	69.9279
DKK3	protein_coding	ENSG00000050165	172.36	169.196	173.077	162.784	168.817	159.778	134.624	134.772	163.032	165.125
ARHGEF5	protein_coding	ENSG00000050327	0.43279	0.391436	0.756759	0.688441	0.9039	0.672564	0.341547	0.52573	0.502623	0.510748
NFE2L3	protein_coding	ENSG00000050344	0.053956	0.0112	0.005971	0	0.002295	0.015889	0	0.035258	0	0
MCUR1	protein_coding	ENSG00000050393	17.8929	16.0286	15.2534	14.5516	14.3504	16.2069	11.8697	12.0812	15.301	16.7398
LIMA1	protein_coding	ENSG00000050405	82.0638	110.106	133.861	135.047	118.894	127.196	80.429	122.483	73.7921	102.979
LETMD1	protein_coding	ENSG00000050426	18.6925	18.3701	46.5893	44.6461	30.119	27.0851	37.3588	42.3728	20.4469	21.1095
SLC4A8	protein_coding	ENSG00000050438	5.05402	3.43653	3.11383	3.26081	3.16804	3.84037	5.88773	5.74104	6.82176	7.50045
LAMC3	protein_coding	ENSG00000050555	12.5291	12.6161	18.7427	19.9239	20.6613	20.6919	21.8574	23.6219	20.1295	23.3169
PTGER3	protein_coding	ENSG00000050628	0.092094	0.091375	0.315638	0.403393	0.268933	0.102698	0.070197	0.059519	0.069499	0.069577
TNIP3	protein_coding	ENSG00000050730	0.772125	0.69281	0.602064	1.17928	1.29097	1.58335	1.35575	0.850403	1.16288	0.790085
MAPK9	protein_coding	ENSG00000050748	35.6999	33.7571	64.119	66.3886	64.5334	57.3851	63.8691	59.2243	41.9391	43.5518
COL23A1	protein_coding	ENSG00000050767	0.005138	0.016956	0	0.024337	0.015747	0.015371	0.008899	0.035597	0.014772	0.008257
BCAR1	protein_coding	ENSG00000050820	39.0849	39.4185	68.3595	62.4914	64.2648	64.2682	53.1509	52.2003	75.4105	84.1868
FAM160A2	protein_coding	ENSG00000051009	17.8928	17.6878	22.6396	29.751	21.7696	20.4904	21.8172	17.8339	12.3811	14.2372
HERPUD1	protein_coding	ENSG00000051108	43.5076	25.3491	35.0845	38.2519	62.2336	66.8494	39.3471	39.3959	38.2876	29.0519
HOMER3	protein_coding	ENSG00000051128	49.2368	47.5706	46.4866	44.1476	45.8094	47.1575	44.7706	47.412	49.0545	56.6192
RAD51	protein_coding	ENSG00000051180	11.6779	13.5031	15.0718	19.2988	13.2284	19.6845	12.8131	10.2419	9.48094	15.5326
POLQ	protein_coding	ENSG00000051341	6.1279	5.30951	28.4895	28.7837	25.2808	23.2487	31.7343	33.1157	19.266	17.6293
PIK3CB	protein_coding	ENSG00000051382	15.7474	12.4919	14.8527	17.9421	13.3197	11.6598	13.9587	14.2874	25.0963	23.4023
CYBA	protein_coding	ENSG00000051523	0.02167	0.034751	1.03575	0.835021	0.366861	0.244293	0.712465	0.667878	0.37052	0.124871
THOC3	protein_coding	ENSG00000051596	63.1773	61.0943	74.0356	71.7851	62.4963	72.3508	55.2437	57.5574	59.9939	60.9497
HEBP2	protein_coding	ENSG00000051620	15.6453	15.3626	15.9325	15.6132	14.1995	15.5349	12.231	13.5558	14.9529	15.8837
MPHOSPH9	protein_coding	ENSG00000051825	24.8224	25.6367	30.4586	34.7567	26.7143	25.1427	37.4609	34.1437	45.2702	40.3697
PLEKHA5	protein_coding	ENSG00000052126	30.2859	30.1064	27.3345	29.0008	24.8886	25.7162	44.5429	35.7044	40.5737	29.5452
PRSS8	protein_coding	ENSG00000052344	0.156848	0.146867	0.98629	0.875346	0.687535	0.707066	1.04238	1.02981	0.105733	0.178676
SIKE1	protein_coding	ENSG00000052723	33.9142	31.7542	34.1167	32.4273	29.5418	31.8714	29.3228	32.0083	30.2363	32.2279
RRP12	protein_coding	ENSG00000052749	70.8219	73.2858	39.8356	43.7547	64.7435	67.7147	66.4755	76.2483	49.8968	50.8072
FNIP2	protein_coding	ENSG00000052795	4.77398	4.89461	10.7983	11.2643	5.96612	6.52384	3.73309	4.69586	8.37824	8.25375
MSMO1	protein_coding	ENSG00000052802	47.8157	47.1033	122.278	120.759	115.761	107.351	131.194	121.632	94.9654	98.7984
TTC17	protein_coding	ENSG00000052841	30.6553	33.492	37.5979	34.1784	31.9938	32.6751	49.9643	45.2006	36.3778	29.3559
ALX4	protein_coding	ENSG00000052850	0.091558	0.126382	0.499836	0.474242	0.22081	0.204797	0.133956	0.158048	0.059187	0.128577
FSTL4	protein_coding	ENSG00000053108	0.352318	0.45616	1.59563	0.918712	0.499637	0.561168	0.208275	0.37426	0.102499	0.240214
FOXN3	protein_coding	ENSG00000053254	15.6665	15.65	32.4222	34.5926	20.1379	20.4854	19.2899	18.4629	32.0497	31.8453
METTL24	protein_coding	ENSG00000053328	0	0	0	0	0	0	0	0	0.040714	0
AKR7A2	protein_coding	ENSG00000053371	27.2141	25.2916	51.2003	53.9095	57.385	51.2049	37.3999	34.9157	27.8904	32.8115
MRTO4	protein_coding	ENSG00000053372	144.137	134.054	66.2391	64.7567	85.035	95.6865	92.7519	104.372	122.395	135.103
NNAT	protein_coding	ENSG00000053438	0	0	0	0	0	0	0	0	0	0
USE1	protein_coding	ENSG00000053501	13.064	11.6802	9.89237	10.4041	12.247	12.726	10.7965	12.3144	13.8548	16.6103
MCF2L2	protein_coding	ENSG00000053524	0.571634	0.588732	2.12972	1.80693	1.51625	1.96509	1.50408	1.45173	0.685869	0.629043
NRIP2	protein_coding	ENSG00000053702	0	0	0	0	0	0	0	0	0	0
LAMA3	protein_coding	ENSG00000053747	1.47801	1.38501	3.65125	3.89558	13.6674	14.1159	18.2886	18.1309	0.516715	0.817592
AP5M1	protein_coding	ENSG00000053770	21.6452	24.4921	16.3864	17.4949	13.6398	14.5804	16.1152	16.5347	11.5648	11.8394
ANAPC4	protein_coding	ENSG00000053900	12.7832	12.3087	15.7004	16.4162	15.0154	14.6773	13.4295	14.2189	17.5624	17.7977
KCNQ1	protein_coding	ENSG00000053918	0.06409	0.165642	0.295371	0.394183	0.203032	0.273912	0.032841	0.135396	0.178499	0.312765
TRAPPC3	protein_coding	ENSG00000054116	92.2282	79.8188	75.1785	73.0974	67.1111	70.1071	56.9066	63.4873	98.2559	119.346
THRAP3	protein_coding	ENSG00000054118	196.973	190.66	127.38	128.831	152.483	166.665	170.636	178.772	220.2	182.497
PHPT1	protein_coding	ENSG00000054148	58.1898	45.0875	124.13	108.217	85.746	73.5253	61.4699	68.2623	36.5901	55.8729
ENTPD2	protein_coding	ENSG00000054179	0	0	0	0	0	0.007429	0	0	0.044273	0
LY75	protein_coding	ENSG00000054219	0	0	0	0	0.001988	0.003586	0	0.003983	0	0
ARID4B	protein_coding	ENSG00000054267	24.028	21.6224	15.0657	15.7546	15.9537	15.8703	23.0244	22.2839	19.3527	16.4378
OPN3	protein_coding	ENSG00000054277	6.20968	4.13741	4.12179	5.71566	1.02731	4.45146	2.44398	2.36318	6.03003	3.82734
SDCCAG8	protein_coding	ENSG00000054282	3.8602	4.51518	10.255	8.91236	11.2529	11.2944	9.96029	9.7138	7.02865	7.00481
PTPRN	protein_coding	ENSG00000054356	128.23	135.687	192.215	165.427	267.31	233.517	187.385	210.959	124.817	137.536
HHAT	protein_coding	ENSG00000054392	10.9757	9.9982	24.6188	25.179	31.672	31.3646	35.1588	34.8275	27.914	26.8181
KIF1B	protein_coding	ENSG00000054523	29.2472	26.3256	23.7214	27.0825	27.4903	28.0087	27.8386	28.9436	30.5041	30.299
FOXC1	protein_coding	ENSG00000054598	17.4181	17.9162	9.01103	9.09192	12.5217	13.9847	7.16981	6.61464	4.13012	4.08584
TBC1D22A	protein_coding	ENSG00000054611	15.4625	15.8181	18.1103	17.8139	13.6243	16.6966	16.6379	15.8229	24.7722	23.524
SYNE2	protein_coding	ENSG00000054654	5.10741	8.34765	27.0648	26.8324	33.4098	32.3794	15.1479	22.0391	12.0515	7.80527
PLEKHH1	protein_coding	ENSG00000054690	1.98011	2.12459	10.8167	10.0669	12.4226	9.49013	6.73761	8.98139	4.76026	4.90008
ATP9A	protein_coding	ENSG00000054793	3.74862	8.8552	17.9582	8.69074	20.7336	20.8797	8.2689	8.39811	3.59226	7.42731
SPO11	protein_coding	ENSG00000054796	0	0	0	0	0	0	0	0	0	0
CBLN4	protein_coding	ENSG00000054803	0.658052	0.563441	0.562851	0.545536	0.61073	0.640421	0.34003	0.370369	0.091292	0.151103
CHRDL2	protein_coding	ENSG00000054938	0	0	0	0	0.005258	0	0	0	0	0
FAM168A	protein_coding	ENSG00000054965	18.625	20.9394	24.5504	28.0407	19.9398	19.6983	23.6232	22.7594	33.9768	35.5921
RELT	protein_coding	ENSG00000054967	15.7485	13.5497	13.875	13.9217	13.2898	13.7702	14.0294	16.2553	8.5329	10.4926
GALC	protein_coding	ENSG00000054983	19.9337	17.818	29.1096	32.9104	31.2205	36.1403	24.8815	26.0889	22.9132	17.9476
NOP58	protein_coding	ENSG00000055044	338.076	322.768	131.173	130.558	183.288	202.138	215.525	239.393	287.525	280.367
SZRD1	protein_coding	ENSG00000055070	154.102	148.961	106.475	114.613	123.455	129.234	89.135	96.662	122.488	137.806
KCNH2	protein_coding	ENSG00000055118	2.10274	2.33097	5.33536	5.70544	3.6196	3.93274	2.56253	2.01702	1.66184	1.68288
CUL1	protein_coding	ENSG00000055130	19.3698	19.0396	15.9099	17.3846	14.6456	15.5392	17.8782	16.6143	30.5825	34.0421
FAM114A2	protein_coding	ENSG00000055147	12.1181	12.6461	13.0323	13.5921	9.3434	9.99766	9.26051	9.46135	18.4738	18.2581
CYFIP2	protein_coding	ENSG00000055163	21.9543	21.7175	45.4244	48.4744	36.5672	33.3845	28.0222	27.9524	22.4346	23.7608
TAB2	protein_coding	ENSG00000055208	70.5579	71.2337	46.7851	48.1647	45.8806	45.6925	62.8867	60.1322	78.2289	83.9287
GINM1	protein_coding	ENSG00000055211	48.5643	45.4677	59.8224	58.9805	58.1984	60.9032	43.6593	45.5176	35.6186	38.7082
EIF2AK2	protein_coding	ENSG00000055332	21.8857	20.9459	48.8369	32.5159	25.1164	27.094	26.3381	24.6621	26.376	24.3103
USP36	protein_coding	ENSG00000055483	74.7541	84.084	32.7871	35.2662	59.797	59.5997	59.7467	66.9992	60.2047	55.7082
KMT2C	protein_coding	ENSG00000055609	6.93508	7.17779	5.02473	6.37373	4.31687	5.16284	6.03684	7.12293	7.29432	7.12163
MCOLN3	protein_coding	ENSG00000055732	0	0	0.042311	0.039983	0.024093	0	0.013044	0.032613	0.020635	0.036134
CCDC85A	protein_coding	ENSG00000055813	1.71905	1.92832	4.91728	4.55986	3.49955	3.5477	1.39818	1.76731	1.23025	1.37201
PUM2	protein_coding	ENSG00000055917	57.5304	60.9667	48.1211	56.8372	49.1108	52.9372	62.1295	61.0892	95.0624	91.1099
MRPL43	protein_coding	ENSG00000055950	62.0262	44.6347	41.5483	32.4349	36.32	51.9821	33.4199	38.0765	48.6339	51.9116
ITIH4	protein_coding	ENSG00000055955	0.332092	0.190206	1.46516	1.24922	1.27059	1.06622	1.09071	1.12396	0.597045	0.876374
ITIH1	protein_coding	ENSG00000055957	0	0	0	0	0	0	0	0	0	0
HPF1	protein_coding	ENSG00000056050	42.3557	36.8098	39.3845	39.0662	27.0929	31.8817	25.0283	26.2862	44.7886	46.5258
ZFR	protein_coding	ENSG00000056097	124.873	126.325	82.1331	80.5291	94.8627	93.7358	117.072	113.033	140.18	130.12
ZNF280C	protein_coding	ENSG00000056277	5.4668	4.21863	4.68704	3.86183	6.78416	6.06424	5.78916	6.3147	2.41938	2.3053
NPFFR2	protein_coding	ENSG00000056291	27.6466	25.9525	32.0628	29.5364	23.4429	22.388	19.3133	18.0941	27.1757	28.7635
PHF21B	protein_coding	ENSG00000056487	6.58916	6.59978	4.53037	4.95782	3.80822	4.23672	3.53478	4.38457	5.80955	5.328
TRAF1	protein_coding	ENSG00000056558	6.02954	7.07465	0.96393	0.974192	10.5843	13.9716	1.42675	1.85358	1.15984	1.66962
RC3H2	protein_coding	ENSG00000056586	16.7426	20.0122	23.1963	21.0967	18.3764	20.4746	26.6438	18.1404	18.3556	18.3672
IL17RB	protein_coding	ENSG00000056736	0.803927	1.04102	4.80678	5.47212	3.61193	3.69483	1.93822	1.76228	0.592259	0.953124
TRAF3IP2	protein_coding	ENSG00000056972	3.80922	4.08948	4.40391	4.79834	3.33995	4.15299	3.49768	3.0405	2.26754	2.83733
GYG2	protein_coding	ENSG00000056998	2.69822	2.71625	3.71933	6.43918	4.32795	3.00504	2.17472	2.28322	5.26319	4.08849
DCBLD2	protein_coding	ENSG00000057019	225.38	224.964	207.44	202.393	352.782	333.564	336.673	321.092	236.533	231.376
SERPINB3	protein_coding	ENSG00000057149	0.065892	0.07319	0	0.045475	0.026896	0.062761	0	0.030969	0.089441	0.014223
SOAT1	protein_coding	ENSG00000057252	35.5672	32.7221	33.5386	32.9953	30.0138	29.1911	27.6581	29.0286	32.797	32.9067
PKP2	protein_coding	ENSG00000057294	10.7479	10.7496	32.6167	32.6061	17.511	16.7688	12.7489	10.5859	18.7105	20.7471
MSH4	protein_coding	ENSG00000057468	0.218706	0.224457	0.150977	0.137272	0.230148	0.141599	0.129478	0.208019	0.161667	0.124577
F7	protein_coding	ENSG00000057593	0.030206	0.015494	0.050596	0.017386	0.009522	0.037258	0.008762	0	0.014567	0
GDI2	protein_coding	ENSG00000057608	476.526	412.746	233.747	274.89	340.446	270.065	215.311	259.518	359.959	451.693
PRDM1	protein_coding	ENSG00000057657	8.04519	7.98671	1.18887	0.758004	3.25001	3.7315	3.69775	4.07416	1.33515	1.18816
ATG5	protein_coding	ENSG00000057663	21.1427	20.3945	14.5294	16.2125	11.5632	11.6916	15.182	10.8831	33.0432	20.5318
TMCC3	protein_coding	ENSG00000057704	0.869697	0.889969	0.461547	0.426274	0.773978	0.76616	0.740451	0.845111	0.158935	0.198921
PITHD1	protein_coding	ENSG00000057757	67.2928	70.4549	72.1061	70.9459	90.1314	99.4293	85.2182	92.7549	84.9431	84.4338
MTA3	protein_coding	ENSG00000057935	15.6659	16.8017	28.1725	29.3622	22.3974	23.2191	23.4736	22.1347	20.4923	18.0572
USP13	protein_coding	ENSG00000058056	10.1103	10.6161	15.6828	15.1771	10.4167	11.7235	11.719	12.3382	20.9963	24.1824
ATP11B	protein_coding	ENSG00000058063	48.3698	42.9574	51.8866	49.575	47.8483	46.6807	39.4825	38.6823	44.7397	40.7361
LAMC2	protein_coding	ENSG00000058085	76.7423	75.6259	75.9165	75.5816	153.739	151.949	168.398	168.551	56.1341	58.6063
CDK14	protein_coding	ENSG00000058091	21.8369	21.7516	31.8662	35.6916	29.8658	29.604	33.4515	30.217	50.4208	45.7538
SEC61A1	protein_coding	ENSG00000058262	175.558	193.892	238.619	141.909	153.57	130.135	130.726	135.822	130.996	234.967
PPP1R12A	protein_coding	ENSG00000058272	26.9574	28.2754	29.5354	27.8192	21.8567	28.5338	36.9867	36.2186	45.9688	32.7252
RASGRF1	protein_coding	ENSG00000058335	33.4324	37.089	47.3576	51.4461	80.4493	85.8429	84.8831	81.8358	48.9221	50.5874
CAMK2B	protein_coding	ENSG00000058404	0.054699	0.156083	1.1469	1.50624	2.27028	1.9701	1.13119	1.41963	0.210405	0.572982
CROCC	protein_coding	ENSG00000058453	7.77397	6.4516	13.801	10.1182	12.1079	10.5038	20.2753	21.6051	13.5871	14.9172
POLR3E	protein_coding	ENSG00000058600	40.7988	36.5694	34.2809	31.9793	28.641	30.248	32.6701	34.9264	62.3102	62.988
ATP2B4	protein_coding	ENSG00000058668	16.9318	16.3359	14.8966	18.3757	15.2866	14.7983	16.2339	15.0404	11.6753	11.7131
ZC3H11A	protein_coding	ENSG00000058673	61.9406	84.034	62.3579	60.6213	58.357	58.8528	108.634	75.1549	71.7857	68.299
RIOK2	protein_coding	ENSG00000058729	24.9009	22.7889	12.7914	14.1438	14.5127	16.4172	18.6907	17.2862	21.2182	21.1019
YIPF1	protein_coding	ENSG00000058799	26.5955	24.9307	29.1823	26.3812	27.3186	25.5116	24.223	25.6061	23.4822	22.6327
NDC1	protein_coding	ENSG00000058804	38.7911	37.6995	32.2191	33.132	32.9417	31.1059	40.6414	39.3805	53.6628	52.3915
DGKG	protein_coding	ENSG00000058866	4.25999	3.49318	6.39932	5.97491	3.92465	5.12611	4.5118	4.95444	5.48663	5.86684
FLYWCH1	protein_coding	ENSG00000059122	15.0022	12.0741	30.7273	32.4664	17.8706	16.3707	24.1039	21.3463	19.6951	22.0827
UNKL	protein_coding	ENSG00000059145	7.59444	7.54261	21.1458	19.5614	18.2843	20.1094	22.0803	22.9031	26.219	27.5705
TBXAS1	protein_coding	ENSG00000059377	1.6645	2.22552	3.48359	4.08282	2.40998	2.55137	1.73942	1.86301	2.03148	1.53929
PARP12	protein_coding	ENSG00000059378	8.52007	10.6167	17.6639	16.4663	19.7859	21.0919	19.2688	23.7938	9.66584	10.0895
ALDH18A1	protein_coding	ENSG00000059573	125.378	118.143	83.9054	86.165	105.573	105.916	88.2383	90.4966	100.685	102.443
TARBP1	protein_coding	ENSG00000059588	2.29286	2.09309	3.64912	3.03701	3.74068	3.52826	2.61073	2.49009	2.42395	2.01524
GATB	protein_coding	ENSG00000059691	17.9796	16.5302	10.8587	12.5378	12.449	12.5149	12.5332	14.856	19.9372	17.3407
MXD1	protein_coding	ENSG00000059728	0.537105	1.89983	2.82911	2.50407	1.3598	3.77945	3.67287	3.96306	0.640276	1.23694
CDK17	protein_coding	ENSG00000059758	20.0929	18.3637	12.1373	12.6233	17.8214	19.7439	19.281	17.9082	18.0782	17.1419
DNAJC25	protein_coding	ENSG00000059769	19.5216	18.0994	8.84751	7.14761	11.8957	12.313	12.4141	12.7995	12.5816	12.1317
SLC2A3	protein_coding	ENSG00000059804	18.7663	30.2353	21.3451	20.8832	12.9261	23.832	20.9807	22.556	7.6868	8.65725
PSD	protein_coding	ENSG00000059915	3.63636	3.39906	7.8768	6.57827	7.06433	5.99578	6.60069	5.46936	3.39919	3.60347
CTDP1	protein_coding	ENSG00000060069	25.9992	26.0004	22.2825	21.7564	22.7232	23.6293	25.3607	27.9398	38.2936	38.7091
YBX3	protein_coding	ENSG00000060138	556.714	347.043	303.629	296.411	256.973	280.015	447.734	314.916	295.348	516.775
STYK1	protein_coding	ENSG00000060140	1.62095	1.7559	6.93447	6.20743	4.08726	4.43985	3.32404	3.65192	3.32308	3.42576
WNK1	protein_coding	ENSG00000060237	48.8299	49.9103	48.6506	56.7057	49.9166	49.199	53.3813	57.3558	68.0107	71.3539
RPS17P5	processed_pseudogene	ENSG00000060303	0	0	0	0	0	0	0	0	0	0
CCAR1	protein_coding	ENSG00000060339	127.229	123.548	103.013	114.201	81.2922	92.3398	141.079	139.333	236.294	212.699
OGFR	protein_coding	ENSG00000060491	75.4784	84.9771	60.6042	64.2266	62.0873	102.434	94.9315	107.267	79.2342	84.8831
GNA15	protein_coding	ENSG00000060558	0.161082	0.076883	0.255882	0.448219	0.649945	0.892141	0.51254	0.412953	0.081687	0.084923
CREB3L3	protein_coding	ENSG00000060566	0	0	0.071621	0.061871	0.055284	0.075431	0.15972	0.072626	0	0.028962
PIGV	protein_coding	ENSG00000060642	3.17279	5.65954	9.60586	9.54179	8.44136	7.72837	4.76754	4.14229	4.50789	3.262
PTPRU	protein_coding	ENSG00000060656	21.5928	20.5237	57.6268	58.494	49.1234	45.8706	43.7564	40.3277	18.2513	17.1055
SNRNP40	protein_coding	ENSG00000060688	73.1702	65.6915	82.1323	81.5796	65.7928	69.3861	68.5413	76.3057	102.96	98.7218
RIMBP2	protein_coding	ENSG00000060709	0.703626	0.506734	2.75893	2.20704	1.89644	2.23681	1.96791	2.0676	1.16779	1.2191
COL11A1	protein_coding	ENSG00000060718	26.692	24.7176	77.9399	82.7003	80.4165	101.052	85.263	87.3089	23.2175	22.1584
QSER1	protein_coding	ENSG00000060749	21.5023	27.1598	30.6053	21.8317	21.559	20.6017	31.4103	29.4118	33.3942	35.4899
MPC1	protein_coding	ENSG00000060762	25.0668	23.2334	48.2226	47.6613	46.5468	47.0539	32.4454	42.3996	24.0852	30.631
ACAA1	protein_coding	ENSG00000060971	25.6135	25.2057	34.5335	32.9253	33.8428	34.2143	32.3056	35.0068	22.2921	23.9648
BCAT1	protein_coding	ENSG00000060982	117.132	119.15	103.319	106.352	79.1796	81.8216	64.1722	67.0997	125.006	124.494
HDAC7	protein_coding	ENSG00000061273	36.1635	36.761	73.6867	63.5079	46.9636	48.8534	58.7206	68.5969	126.099	129.124
LZTS1	protein_coding	ENSG00000061337	1.13777	1.36894	7.17668	8.09916	2.56197	2.79745	1.69382	1.81601	1.27726	1.5512
PRDM6	protein_coding	ENSG00000061455	0.010132	0.012137	0.096105	0.203927	0.033931	0.027715	0.063347	0.116548	0.208751	0.061871
WNT8A	protein_coding	ENSG00000061492	0	0	0	0	0	0	0	0	0	0
SPAG4	protein_coding	ENSG00000061656	2.40639	2.23448	6.35799	5.2062	5.94657	5.58228	3.86178	4.88867	1.41708	1.49155
NCKAP1	protein_coding	ENSG00000061676	38.2385	39.4337	32.4382	41.6154	31.4034	34.554	61.4257	30.014	47.5433	35.7994
MRPS35	protein_coding	ENSG00000061794	54.9388	56.6847	38.3596	43.3954	34.0834	39.7321	42.6132	47.8216	77.2091	67.0475
GUCY1B1	protein_coding	ENSG00000061918	1.32252	0.9119	2.87316	3.3689	1.90356	2.36946	0.973379	0.828169	1.72799	2.09849
SFSWAP	protein_coding	ENSG00000061936	33.2588	35.7643	25.973	23.8373	28.325	28.6549	36.4513	36.5064	53.3241	53.0935
TNK2	protein_coding	ENSG00000061938	16.6535	16.0299	27.2256	24.7797	33.0955	31.9357	32.7311	37.3126	23.6703	28.4812
MON2	protein_coding	ENSG00000061987	12.9747	17.5202	17.6531	17.6454	13.2587	13.0182	18.3749	19.7179	18.5133	14.3306
CDH3	protein_coding	ENSG00000062038	0.06185	0.093395	0.121633	0.304137	0.382907	0.71004	0.335249	0.688235	0.117325	0.049442
ARSF	protein_coding	ENSG00000062096	0	0	0.037342	0	0.011972	0.011487	0	0	0	0
GPBP1	protein_coding	ENSG00000062194	79.5763	73.7226	38.178	40.0243	38.2558	41.6706	54.2723	52.7272	88.0764	83.8807
DGAT2	protein_coding	ENSG00000062282	7.81918	6.28497	7.13445	7.12252	6.87479	7.19786	4.90066	4.71137	5.35266	6.90736
ZNF112	protein_coding	ENSG00000062370	4.78906	4.1368	5.26467	4.63428	3.53276	3.89179	4.93658	5.05684	4.8507	4.24926
CS	protein_coding	ENSG00000062485	88.9162	161.331	75.6848	162.588	78.7908	71.1006	127.043	90.8311	174.65	165.654
LTK	protein_coding	ENSG00000062524	0.183411	0.254115	0.558715	0.393488	0.434382	0.422835	0.589305	0.567911	0.411707	0.771473
MRPS24	protein_coding	ENSG00000062582	222.73	199.868	216.356	207.386	171.634	192.062	124.388	135.911	215.417	254.028
ELMO2	protein_coding	ENSG00000062598	40.4016	31.9483	38.4469	40.019	38.3374	47.8296	46.1457	54.3733	64.7397	65.2993
WAPL	protein_coding	ENSG00000062650	54.4016	51.5541	37.4469	41.3989	38.5926	40.5096	57.368	50.7163	73.4861	72.9596
VMP1	protein_coding	ENSG00000062716	166.444	153.94	207.11	185.25	188.75	191.769	192.126	192.094	99.3343	96.0622
APPBP2	protein_coding	ENSG00000062725	18.0506	16.7575	27.5073	27.6036	26.5708	25.3831	29.6249	31.4448	28.8695	28.1669
POLD1	protein_coding	ENSG00000062822	66.4891	69.5305	95.2795	87.4032	78.6216	78.5097	66.2971	80.7155	87.7199	102.981
SEZ6	protein_coding	ENSG00000063015	0	0	0.022316	0.162827	0.029297	0	0	0.006113	0.015585	0
EIF4B	protein_coding	ENSG00000063046	362.109	344.363	268.069	306.864	250.82	251.734	262.577	289.787	456.025	439.134
SLC6A16	protein_coding	ENSG00000063127	1.77229	2.30323	5.99733	4.95089	3.64928	2.98669	4.2661	3.93931	2.79534	3.12932
BICRA	protein_coding	ENSG00000063169	12.757	12.7338	9.98565	8.12731	9.20227	7.14543	11.8047	12.3423	14.6796	16.6853
SPHK2	protein_coding	ENSG00000063176	7.73923	8.61075	12.0459	10.5708	11.5155	9.45841	12.2462	16.8177	12.8985	14.4582
RPL18	protein_coding	ENSG00000063177	472.681	419.645	432.468	421.07	396.658	397.274	285.796	313.372	437.945	503.689
CA11	protein_coding	ENSG00000063180	20.5539	19.0736	24.8123	24.979	27.246	27.1382	23.3187	26.0284	20.4561	21.13
ISOC2	protein_coding	ENSG00000063241	65.4296	56.8686	69.2126	64.6331	68.2348	68.3928	56.3479	49.3842	63.725	72.9423
U2AF2	protein_coding	ENSG00000063244	315.011	314.943	198.533	189.818	210.353	202.158	226.51	240.757	298.866	315.236
EPN1	protein_coding	ENSG00000063245	31.1192	33.1491	56.691	54.0768	27.1539	27.9503	27.1749	24.8995	59.9424	68.3293
MED29	protein_coding	ENSG00000063322	21.409	4.85847	6.16918	5.96479	5.70865	3.26683	4.81927	5.76559	16.0614	2.03439
AHRR	protein_coding	ENSG00000063438	1.54815	1.18356	6.51701	5.71364	5.64838	5.47681	5.57611	4.16941	6.02882	6.45471
GSC2	protein_coding	ENSG00000063515	0.058461	0.083625	0.117384	0	0.133455	0.083901	0	0.116168	0.040969	0.061208
ZNF275	protein_coding	ENSG00000063587	10.3066	11.8409	6.67708	9.54819	7.29776	8.27263	13.9713	14.9133	8.64304	8.54149
MTMR1	protein_coding	ENSG00000063601	13.0992	13.0948	16.9482	15.402	16.6133	17.0596	18.1502	18.6008	22.7694	24.5706
GPC1	protein_coding	ENSG00000063660	214.863	194.849	257.571	263.681	244.128	213.656	160.219	164.458	218.989	276.609
ADCK1	protein_coding	ENSG00000063761	1.98991	2.11842	6.72364	7.25082	6.99271	6.22876	5.79199	5.64366	4.9938	4.5188
HAGH	protein_coding	ENSG00000063854	19.6033	18.8032	39.9307	33.6128	25.7778	33.851	23.5623	24.4713	26.2238	27.5823
RNF4	protein_coding	ENSG00000063978	37.3493	47.5725	11.2927	15.4548	30.7676	22.1213	37.1883	23.651	32.121	45.3206
CASP8	protein_coding	ENSG00000064012	45.5211	49.7659	48.2743	52.4307	43.4983	46.3742	61.8428	64.8555	48.9964	42.8862
LIMCH1	protein_coding	ENSG00000064042	48.2487	49.5027	80.1299	85.5067	137.672	167.781	114.92	116.095	62.1129	59.8083
INTS13	protein_coding	ENSG00000064102	60.8549	74.0139	37.5017	45.9057	28.9822	39.2859	49.3828	47.2586	78.0631	68.3365
TM7SF3	protein_coding	ENSG00000064115	47.5984	49.0653	142.324	126.887	107.267	115.851	94.3634	77.2774	48.595	48.2579
DLX3	protein_coding	ENSG00000064195	0.414236	0.527672	0.782221	0.624264	0.954913	0.849052	1.0144	0.773474	0.454207	0.388197
SPA17	protein_coding	ENSG00000064199	26.3576	25.0344	15.6863	12.8216	13.6367	14.1385	10.4315	10.4375	32.5451	30.5779
TSPAN32	protein_coding	ENSG00000064201	0	0	0.057145	0.160097	0.029286	0.067345	0.017318	0.022013	0	0
WISP2	protein_coding	ENSG00000064205	0.090559	0.050355	0.481252	0.234333	0.319136	0.147255	0.254207	0.27226	0.02613	0.03913
DMRT3	protein_coding	ENSG00000064218	0.271514	0.42536	0.637602	0.613013	0.335916	0.367219	0.027405	0.187501	0.180757	0.180241
ST3GAL6	protein_coding	ENSG00000064225	6.41261	5.65225	8.94864	8.10851	7.69079	7.46084	5.25751	6.91235	4.07475	3.65835
ATP2C2	protein_coding	ENSG00000064270	0	0.042807	0.037253	0.148079	0.560269	0.486637	0.510252	0.580235	0	0.036194
NGFR	protein_coding	ENSG00000064300	3.7721	3.67274	2.2445	2.4442	5.35203	3.99461	5.97487	5.47884	1.64666	1.53056
CDON	protein_coding	ENSG00000064309	3.09162	2.91479	9.50794	10.2669	7.19633	5.99795	8.20097	8.33761	5.48411	5.54235
TAF2	protein_coding	ENSG00000064313	66.5426	68.1401	56.6432	57.1752	54.1249	59.2221	61.8167	65.55	74.266	71.5162
HIPK2	protein_coding	ENSG00000064393	11.7412	12.0046	9.27137	11.7177	13.7268	13.5896	12.1037	12.1199	19.4904	18.9633
TNPO3	protein_coding	ENSG00000064419	36.7284	42.5427	28.017	34.6086	24.9828	28.617	33.1411	36.778	62.2451	62.716
BORCS8-MEF2B	protein_coding	ENSG00000064489	5.99598	6.68544	5.48667	6.43569	4.52414	4.4463	4.9442	5.49576	8.37441	10.417
RFXANK	protein_coding	ENSG00000064490	17.7224	17.0315	27.3061	26.3913	24.5763	24.7315	15.4327	18.5403	20.4372	17.4571
TMEM161A	protein_coding	ENSG00000064545	5.15818	5.72335	8.46216	6.50388	5.87797	5.24807	4.97479	6.35188	6.93185	7.08172
LPAR2	protein_coding	ENSG00000064547	1.78948	1.80977	10.665	8.4163	5.47531	4.47391	4.9836	6.36748	3.15503	3.59037
CTSA	protein_coding	ENSG00000064601	67.5365	71.8425	110.904	106.694	99.8821	96.9072	98.7787	97.1133	72.404	68.361
SUGP2	protein_coding	ENSG00000064607	19.0741	23.2422	26.6199	29.8883	26.0146	27.7687	38.2135	30.5663	37.3467	45.2607
SLC12A2	protein_coding	ENSG00000064651	29.5753	28.3439	34.0589	35.8632	42.5337	39.6027	33.1729	33.3086	23.3261	23.7596
SNX24	protein_coding	ENSG00000064652	16.8384	16.4547	36.2377	35.8369	21.4811	18.4883	25.8002	21.531	45.8452	45.2294
EYA2	protein_coding	ENSG00000064655	1.07452	1.05903	9.38414	9.35911	6.46185	6.73389	3.51947	3.29605	2.8591	2.86848
CNN2	protein_coding	ENSG00000064666	80.3179	60.0852	52.2797	64.0176	56.6717	69.51	48.1092	53.4985	55.1419	74.2996
ABCA7	protein_coding	ENSG00000064687	1.02044	1.55103	5.1822	6.05428	6.30872	3.7847	4.97891	6.64342	1.14182	2.27492
SNCAIP	protein_coding	ENSG00000064692	0.350751	0.270109	0.403498	0.310677	1.20342	1.30737	0.967378	0.336131	0.743757	0.667415
DDX20	protein_coding	ENSG00000064703	24.485	23.7458	19.785	19.9792	17.5008	19.2956	20.8253	19.6906	18.9504	19.9565
BTBD1	protein_coding	ENSG00000064726	76.1839	72.1088	58.7901	60.4731	56.5778	63.8077	50.974	52.8651	70.679	70.2795
FAR2	protein_coding	ENSG00000064763	2.35433	2.27627	3.78478	3.84041	3.8536	3.6622	3.08311	1.78639	2.11286	2.17223
BCAS1	protein_coding	ENSG00000064787	0.037691	0.008443	0.071627	0.028625	0.173858	0.172631	0.287548	0.333226	0	0.045451
POU1F1	protein_coding	ENSG00000064835	0	0	0	0	0	0	0	0	0	0
CHI3L2	protein_coding	ENSG00000064886	1.03823	0.764939	1.77268	1.29353	1.27618	1.23661	0.673031	0.670697	0.633269	0.842271
SBNO2	protein_coding	ENSG00000064932	15.0681	16.0677	18.2888	17.9864	25.2175	27.4592	17.6651	18.746	20.1362	24.2106
PMS1	protein_coding	ENSG00000064933	9.78897	10.0316	24.1208	17.593	14.9683	14.05	14.5126	13.8858	17.6007	16.2965
HMG20B	protein_coding	ENSG00000064961	93.93	94.0968	85.5241	83.6918	79.1542	80.7322	88.5308	89.5692	148.191	158.377
CALCRL	protein_coding	ENSG00000064989	0.10627	0.061192	0.436933	0.539674	0.2604	0.306705	0.247255	0.131231	0.035584	0.019308
TAF11	protein_coding	ENSG00000064995	84.7844	76.4329	67.9618	64.7897	67.0053	72.7113	65.5344	74.4576	83.0386	88.2943
ANKS1A	protein_coding	ENSG00000064999	13.5902	13.5254	13.4499	14.8862	19.1727	19.228	19.7764	19.566	24.6094	26.3539
AP3D1	protein_coding	ENSG00000065000	53.1398	58.392	49.3713	53.2369	52.6287	53.9086	58.2475	56.7197	91.454	88.7576
ZNF76	protein_coding	ENSG00000065029	6.75075	6.89818	18.6459	16.3611	19.4248	17.0408	17.1363	18.1917	14.7584	17.426
SLC9A3R2	protein_coding	ENSG00000065054	25.82	26.1822	27.5034	25.5821	23.8111	22.66	25.7378	26.7703	27.8383	30.413
NTHL1	protein_coding	ENSG00000065057	19.7566	21.0016	17.8493	16.9457	12.0479	11.469	11.7834	14.231	23.0652	24.92
UHRF1BP1	protein_coding	ENSG00000065060	9.23954	9.02896	34.8946	39.6985	19.7356	20.2541	11.2036	11.3019	20.3442	21.7366
GNAI3	protein_coding	ENSG00000065135	16.8711	16.1152	12.8214	13.2307	13.4525	14.5476	13.6762	13.8528	18.1192	17.7763
IPO5	protein_coding	ENSG00000065150	123.553	106.015	95.7779	104.019	92.8381	92.8572	88.6528	90.4756	121.319	123.88
OAT	protein_coding	ENSG00000065154	141.344	126.211	194.215	192.723	163.976	176.899	128.29	130.124	131.685	129.758
WDR3	protein_coding	ENSG00000065183	84.9172	80.9682	34.1659	38.8195	53.9139	61.2697	55.2479	64.3265	93.5989	89.5917
PKN2	protein_coding	ENSG00000065243	35.4806	34.967	42.8538	40.1165	39.0378	38.5077	45.585	44.4583	44.0963	46.3341
WDR18	protein_coding	ENSG00000065268	46.1688	48.7061	39.6414	40.0671	36.2412	39.9899	33.5738	33.839	50.2654	61.0371
TRAM2	protein_coding	ENSG00000065308	24.1367	24.4353	43.8312	45.7412	36.2784	32.4395	52.6254	53.3063	49.059	51.8598
NTN1	protein_coding	ENSG00000065320	11.8835	11.2523	35.4915	35.317	31.4978	27.6616	20.2598	21.7371	13.8747	15.4109
GLP2R	protein_coding	ENSG00000065325	4.86723	4.60791	19.7069	18.45	25.4338	28.7809	17.8668	20.0162	7.03069	6.12521
MCM10	protein_coding	ENSG00000065328	41.725	40.5218	49.6906	51.5597	45.0797	49.9594	34.5676	36.2854	44.3411	44.1368
DGKA	protein_coding	ENSG00000065357	8.44242	8.91511	36.1056	28.8901	17.6458	21.116	14.0406	17.8609	10.8018	13.2988
ERBB3	protein_coding	ENSG00000065361	1.40267	1.57065	2.25575	2.63327	0.991822	1.4824	1.89221	1.48125	1.83101	1.81263
ROPN1	protein_coding	ENSG00000065371	0.01692	0.017474	0.268525	0.294116	0.075412	0	0.032395	0.056518	0	0
ANKRD44	protein_coding	ENSG00000065413	1.59303	1.36336	8.95303	7.85625	5.13567	4.83708	3.76439	3.46861	2.88988	3.04303
KARS	protein_coding	ENSG00000065427	246.561	234.304	152.873	172.089	146.636	156.618	138.362	147.041	233.573	236.255
ADAT1	protein_coding	ENSG00000065457	34.8308	37.4814	69.874	76.4388	68.7286	73.1454	50.1511	53.7411	29.7679	40.0643
PDIA5	protein_coding	ENSG00000065485	39.8289	38.2156	44.9292	42.6242	44.2096	43.4624	48.606	48.7421	48.027	47.4523
TBC1D22B	protein_coding	ENSG00000065491	20.8196	20.8426	25.225	26.1918	26.6487	28.8545	19.5474	20.8845	33.0836	32.8774
NDUFB4	protein_coding	ENSG00000065518	90.1717	80.4743	87.8997	80.3296	66.6392	71.7392	48.8469	53.8451	87.6231	90.9429
SPEN	protein_coding	ENSG00000065526	34.249	33.2526	17.5731	20.7334	25.788	25.2078	30.5929	30.0708	25.9479	27.2444
MYLK	protein_coding	ENSG00000065534	12.7811	11.2212	27.5668	36.9096	33.3778	24.7437	18.9805	27.1657	19.5072	19.4116
ZC3H15	protein_coding	ENSG00000065548	183.243	168.335	90.7911	101.139	97.7777	112.532	117.696	129.372	198.268	185.889
MAP2K4	protein_coding	ENSG00000065559	23.8885	21.4691	19.116	22.7771	19.8659	21.3263	17.67	19.9493	37.2569	35.9532
TMEM206	protein_coding	ENSG00000065600	11.3214	9.94158	11.2671	13.9272	12.3844	9.54429	15.5243	17.1368	16.1124	18.745
SNAP91	protein_coding	ENSG00000065609	0.065645	0.199611	1.62412	1.61893	1.17735	0.896323	0.156553	0.266204	0.143153	0.171244
SLK	protein_coding	ENSG00000065613	35.1078	32.1424	25.794	28.3368	31.8098	36.3671	28.0843	27.0305	40.6262	37.7925
CYB5R4	protein_coding	ENSG00000065615	9.17591	9.11311	5.5146	5.65413	5.1672	5.91837	5.48936	5.01525	8.13413	7.71328
COL17A1	protein_coding	ENSG00000065618	5.85517	5.2935	12.5898	11.4074	14.5434	16.6105	20.667	21.9299	4.65147	4.4776
GSTO2	protein_coding	ENSG00000065621	8.14453	7.41934	11.9815	11.4612	12.8826	12.8141	9.27173	10.8159	7.02103	6.70211
SEC61A2	protein_coding	ENSG00000065665	14.0126	16.0465	22.5745	17.8258	19.2579	18.1177	15.8175	17.8534	19.4558	19.8147
PRKCQ	protein_coding	ENSG00000065675	3.57752	3.79204	10.5417	10.3843	6.36004	6.20445	5.60942	5.84946	8.73224	9.73093
TLE2	protein_coding	ENSG00000065717	6.97106	7.62844	10.7514	11.3673	7.39457	7.63708	7.42116	8.9908	10.0806	9.57902
ASB1	protein_coding	ENSG00000065802	24.1327	34.5042	27.3536	32.41	25.9959	49.8226	41.7883	25.7983	25.2501	26.5511
FAM107B	protein_coding	ENSG00000065809	52.9509	51.0499	45.4578	48.6977	44.9218	49.0019	32.8134	33.2553	66.8982	65.6399
ME1	protein_coding	ENSG00000065833	14.0402	13.5432	18.7212	19.7491	16.4394	17.1159	9.66553	9.64566	17.1263	16.8707
TBC1D1	protein_coding	ENSG00000065882	70.1394	67.8905	94.6736	90.7051	72.3931	75.4014	63.3116	64.1655	97.0099	102.049
CDK13	protein_coding	ENSG00000065883	50.9748	46.3315	27.5293	35.9383	34.576	33.6816	34.4894	41.1663	34.5148	36.456
MTHFD2	protein_coding	ENSG00000065911	131.202	126.191	245.837	264.216	211.987	242.315	124.654	135.897	148.217	144.948
SLC9A7	protein_coding	ENSG00000065923	13.0152	12.8365	12.6271	13.506	12.782	11.3339	13.3923	13.9744	8.12736	8.16662
FOXJ2	protein_coding	ENSG00000065970	23.1417	23.1071	32.6686	33.7438	21.1961	20.7846	24.3147	23.6527	26.0308	27.4255
YBX1	protein_coding	ENSG00000065978	3682.58	3763.95	2566.44	2599.41	2454.86	2757.84	2581.44	2525.41	4073.13	3930.4
PDE4A	protein_coding	ENSG00000065989	15.7953	15.772	17.0355	17.3153	16.8304	15.4094	12.3603	12.0682	9.45627	10.9325
PPP2R5A	protein_coding	ENSG00000066027	28.5043	25.6894	20.1376	21.3068	15.2214	16.4763	14.6418	15.0645	24.4942	25.6819
CTNNA2	protein_coding	ENSG00000066032	0.564131	0.704559	0.596639	0.504462	0.427316	0.441577	0.375116	0.620829	0.555742	0.536036
ELAVL1	protein_coding	ENSG00000066044	40.4125	39.9864	36.7844	35.6392	34.653	36.8121	33.1028	33.7622	48.135	51.1729
TIE1	protein_coding	ENSG00000066056	0.402046	0.506182	0.885171	0.710343	5.17621	5.65838	4.85911	4.7862	0.349892	0.257045
DIP2B	protein_coding	ENSG00000066084	15.9026	16.1688	13.9558	15.9288	13.6321	14.4622	21.3202	20.7872	25.1232	25.0167
SMARCD1	protein_coding	ENSG00000066117	42.9978	40.6323	37.3558	34.0486	33.8691	36.0535	37.2155	44.5192	62.4084	62.6446
KDM4A	protein_coding	ENSG00000066135	37.898	35.8445	45.6418	48.3905	30.1438	30.9342	47.0675	46.4793	54.6543	56.7288
NFYC	protein_coding	ENSG00000066136	60.0763	50.7149	42.0747	42.5701	35.3006	31.6868	60.2069	38.5684	76.0484	63.3948
ZMYND12	protein_coding	ENSG00000066185	0.165402	0	0.243641	0.083469	0.145496	0.323194	0.10375	0.079454	0.053846	0.021287
SLC9A3	protein_coding	ENSG00000066230	4.16104	4.69738	6.92418	6.52729	5.75218	5.95153	5.60695	3.78582	4.41849	5.21418
NGEF	protein_coding	ENSG00000066248	1.83417	2.02417	4.64561	5.35271	4.15036	4.88595	2.77021	3.72881	2.79027	2.67
ASPM	protein_coding	ENSG00000066279	7.63761	6.77345	18.1293	20.1334	21.2353	21.0746	66.506	62.0676	59.1443	54.2096
CD84	protein_coding	ENSG00000066294	0	0	0	0.009889	0	0	0.00333	0	0	0
ELOVL1	protein_coding	ENSG00000066322	96.3416	90.2215	105.099	108.696	117.298	120.618	128.266	138.981	118.517	125.372
SPI1	protein_coding	ENSG00000066336	0.100299	0.069072	0.356602	0.118995	0.194142	0.103941	0.077276	0.268599	0	0.099047
ZNRD1	protein_coding	ENSG00000066379	22.2976	16.4861	13.1318	13.5323	12.0853	12.2576	10.6452	13.8937	24.3006	23.4871
MPPED2	protein_coding	ENSG00000066382	0.369755	0.391826	1.63345	1.67061	1.93085	2.57849	1.38419	1.09103	0.718974	0.523349
CLDN18	protein_coding	ENSG00000066405	0	0	0	0	0	0	0	0.011647	0	0
ZBTB11	protein_coding	ENSG00000066422	42.0877	40.2429	21.0737	22.281	17.4107	17.8891	25.2188	26.1907	24.6116	24.076
ATXN3	protein_coding	ENSG00000066427	13.3573	13.0384	10.3476	10.5926	8.87848	10.4098	10.6345	9.19686	16.6969	14.8946
GOLGA5	protein_coding	ENSG00000066455	24.0486	24.5127	23.1631	24.4016	27.1724	30.8227	28.6209	27.4665	34.5728	33.6112
FGFR2	protein_coding	ENSG00000066468	15.7232	14.3442	22.2205	22.9631	17.734	18.3262	11.8045	13.632	14.2381	13.6945
LRRC40	protein_coding	ENSG00000066557	25.6818	23.1976	26.5563	27.238	24.2981	26.2013	20.4385	20.2551	36.7075	36.8666
ISOC1	protein_coding	ENSG00000066583	46.2536	46.525	53.949	53.9002	52.2834	56.9322	30.481	33.0484	47.0665	45.7323
EML1	protein_coding	ENSG00000066629	3.03613	3.4091	2.74404	3.26093	2.37984	2.72503	1.99815	2.44795	4.20299	4.25282
TRMT11	protein_coding	ENSG00000066651	19.2372	18.1135	12.5585	12.3065	10.684	16.1436	12.4538	13.1842	14.7458	13.0509
THUMPD1	protein_coding	ENSG00000066654	33.8328	33.3674	22.5219	24.9294	25.0201	26.6787	34.7725	36.7612	41.8047	43.0985
MSANTD3	protein_coding	ENSG00000066697	180.666	188.657	121.931	134.122	134.591	154.758	115.451	113.054	191.945	171.359
KIF26A	protein_coding	ENSG00000066735	3.99997	3.90382	8.11902	9.1628	5.59216	4.68644	2.24484	2.58729	3.43176	4.03653
ATG2B	protein_coding	ENSG00000066739	1.65174	1.78873	3.19172	3.5907	3.71632	3.26597	3.1264	3.17466	2.62608	2.43806
ARFGEF1	protein_coding	ENSG00000066777	27.0159	27.5053	22.6689	28.1653	23.1022	24.6345	27.1062	23.3694	40.5341	45.4248
ACSM2B	protein_coding	ENSG00000066813	0	0	0	0	0	0	0	0	0	0
ZFAT	protein_coding	ENSG00000066827	7.58824	8.83002	3.98101	4.38141	4.35669	4.53094	8.54438	8.89528	7.77377	7.77756
MTFR1	protein_coding	ENSG00000066855	42.3109	39.7205	35.9972	38.8537	25.587	24.3919	25.4936	24.8624	38.7898	49.9159
STAG3	protein_coding	ENSG00000066923	0.590944	0.518704	0.176235	0.138235	0.382197	0.339593	0.794936	0.639034	0.569068	0.454767
FECH	protein_coding	ENSG00000066926	9.29229	8.63459	16.1752	16.8565	14.4488	16.1832	10.6083	10.4583	12.7768	13.6055
MYO9A	protein_coding	ENSG00000066933	4.20319	4.09475	7.54222	9.46453	8.35586	8.96648	10.4657	11.212	11.3024	10.8472
DDX3Y	protein_coding	ENSG00000067048	0	0	0	0	0	0	0	0	0	0
PFKP	protein_coding	ENSG00000067057	86.9999	83.0322	106.81	106.846	116.29	128.658	114.687	116.001	127.511	131.743
IDI1	protein_coding	ENSG00000067064	19.4325	17.9487	38.7753	37.7241	32.7911	35.4495	31.4123	30.0671	32.7222	36.3803
SP100	protein_coding	ENSG00000067066	39.0804	33.1673	28.7475	29.0121	26.3681	28.255	28.8391	29.6755	34.8582	33.8433
KLF6	protein_coding	ENSG00000067082	33.4001	35.0825	14.1031	14.6586	17.6593	28.717	45.3784	23.3555	17.3306	8.46205
PLPP1	protein_coding	ENSG00000067113	9.25654	9.48644	26.7245	25.2269	20.9977	20.7007	17.7687	13.4898	12.6827	11.9388
NEO1	protein_coding	ENSG00000067141	15.748	16.2378	27.6854	28.4602	24.512	25.8876	22.6366	20.5647	17.5745	18.5332
TRAM1	protein_coding	ENSG00000067167	170.586	154.201	184.416	163.255	190.098	206.125	210.498	192.665	153.429	155.985
PHKA1	protein_coding	ENSG00000067177	4.99008	5.00171	12.7857	15.06	10.7927	11.1715	6.70515	6.82344	7.22045	7.09119
TNFRSF1A	protein_coding	ENSG00000067182	106.072	96.4324	69.3895	65.3172	106.641	128.919	107.003	119.061	94.3974	92.7447
CACNB1	protein_coding	ENSG00000067191	8.10762	6.4283	15.7089	12.8929	16.7821	14.0432	15.6284	16.1317	6.98912	8.1061
EVI5	protein_coding	ENSG00000067208	18.2761	16.8345	11.1461	15.2036	10.8319	12.2197	19.4354	20.5885	11.8724	12.3059
STOML1	protein_coding	ENSG00000067221	3.12759	3.36601	4.47969	6.04697	3.61091	5.2695	2.93273	3.83412	3.98625	5.27937
PKM	protein_coding	ENSG00000067225	1793.15	2000.82	1240.43	1377.65	1324.57	1390.26	1134.62	1511.56	1861.52	1803.28
DHX29	protein_coding	ENSG00000067248	37.307	36.0603	26.8	30.2808	23.9857	25.9518	27.725	26.8315	50.1101	46.9939
DNTTIP2	protein_coding	ENSG00000067334	41.093	39.5485	20.7429	20.494	25.0309	29.9694	31.6101	30.5529	40.2601	36.3065
METTL22	protein_coding	ENSG00000067365	14.5424	16.6445	23.7676	20.3428	19.3453	17.1344	23.4005	24.6028	13.27	11.5175
TP53BP1	protein_coding	ENSG00000067369	24.4473	23.4815	25.4619	28.5012	20.3237	22.666	27.0167	30.8329	19.7493	25.2999
TRO	protein_coding	ENSG00000067445	14.2415	18.1901	38.0276	38.6248	34.2851	35.9194	37.8263	38.2509	16.1241	24.3758
RRP15	protein_coding	ENSG00000067533	17.4063	15.5271	5.806	5.98886	9.98638	11.0379	9.60746	10.278	15.0832	14.0883
RHOA	protein_coding	ENSG00000067560	433.891	639.4	375.374	380.539	332.543	351.526	288.44	288.9	561.873	450.648
DHX8	protein_coding	ENSG00000067596	31.059	29.4491	22.4669	24.0883	26.1318	27.1388	29.2995	31.3119	32.1909	33.8232
PMS2P4	transcribed_unprocessed_pseudogene	ENSG00000067601	4.56596	4.27393	11.5266	8.6016	6.49583	6.88735	4.62448	5.03695	6.85513	7.45098
PRKCZ	protein_coding	ENSG00000067606	14.776	13.2211	15.4741	17.8323	14.5839	14.5072	18.4955	17.8951	22.0023	22.6153
ZFY	protein_coding	ENSG00000067646	0	0	0	0	0	0	0	0	0	0
IARS2	protein_coding	ENSG00000067704	97.8118	89.6228	90.8597	96.2093	85.1596	89.4927	71.5011	71.3107	102.093	101.405
SYT1	protein_coding	ENSG00000067715	0.609725	0.665371	3.34135	2.32835	2.90101	2.46112	4.7359	4.78108	2.39324	2.22345
NAV3	protein_coding	ENSG00000067798	31.1779	33.9917	18.7391	16.351	30.5184	31.7131	34.3338	36.2055	32.7564	23.1902
IDH3G	protein_coding	ENSG00000067829	39.017	39.8627	40.4872	32.7827	33.8967	40.5853	37.3344	40.5126	41.4225	45.0469
ROGDI	protein_coding	ENSG00000067836	9.80758	10.2386	18.2609	19.2794	14.4091	13.136	13.3123	15.0856	13.5716	15.2032
PDZD4	protein_coding	ENSG00000067840	9.53159	8.80817	19.9015	20.9372	20.8433	21.2594	6.6399	9.7812	10.3567	7.88237
ATP2B3	protein_coding	ENSG00000067842	0.143354	0.267447	1.202	1.70513	0.645001	0.635636	0.470282	0.150557	0.362005	0.610765
ROCK1	protein_coding	ENSG00000067900	34.3865	26.7067	23.7452	26.8303	23.8059	24.0015	25.5604	29.8201	39.4577	39.1131
CBFB	protein_coding	ENSG00000067955	94.3299	83.3416	44.7777	67.4568	112.678	129.328	79.307	83.2314	80.3729	57.3966
PDK3	protein_coding	ENSG00000067992	3.17706	3.51298	6.93135	5.41998	4.99254	4.12495	3.81856	3.73671	4.04153	4.47156
HYAL2	protein_coding	ENSG00000068001	25.7586	33.346	41.6313	45.4004	35.8705	51.7208	47.1374	51.7283	37.3122	52.6963
HDAC4	protein_coding	ENSG00000068024	0.112273	0.172049	0.641861	1.43287	0.781895	0.525545	1.54419	1.58156	1.01382	0.769644
RASSF1	protein_coding	ENSG00000068028	12.6215	13.5025	25.226	24.8597	13.9037	22.4582	31.6354	23.1986	29.092	32.2859
FGFR3	protein_coding	ENSG00000068078	2.44324	2.30525	5.22335	3.971	3.13842	3.81987	2.38302	2.44962	1.11006	1.42444
IFI35	protein_coding	ENSG00000068079	0.313841	0.140447	0.144218	0.159467	0.160883	0.155461	0.679894	0.317462	0.331393	0
HEATR6	protein_coding	ENSG00000068097	30.1737	30.928	29.9349	36.3365	29.8315	31.9841	36.602	34.3872	34.4738	31.7565
COASY	protein_coding	ENSG00000068120	59.8605	58.7403	58.6668	54.3553	55.0925	55.0914	51.1879	52.1218	67.6452	75.5205
PLEKHH3	protein_coding	ENSG00000068137	7.30287	7.34728	14.737	13.5725	5.72754	6.20003	4.24601	4.8667	5.63658	5.73445
MEF2A	protein_coding	ENSG00000068305	16.0596	16.5867	16.7556	18.8872	17.3958	19.6738	14.6741	15.9883	14.577	14.4713
OTUD5	protein_coding	ENSG00000068308	50.5203	50.0204	42.6131	45.313	51.6382	54.8693	55.3135	57.2624	38.0833	40.0593
TFE3	protein_coding	ENSG00000068323	89.0533	93.1135	81.7271	80.113	75.7992	74.7466	75.1542	80.3781	113.989	122.544
TBC1D25	protein_coding	ENSG00000068354	9.90551	11.3751	15.221	13.3072	12.8872	12.1162	11.6933	12.1194	15.5442	15.1874
ACSL4	protein_coding	ENSG00000068366	26.2643	24.6052	23.5844	24.1544	34.4574	37.1993	36.8459	36.4771	36.6004	33.648
INPP5A	protein_coding	ENSG00000068383	16.5766	16.6634	16.3436	16.2586	13.8538	14.5365	16.3881	15.8635	34.9376	35.7335
GPKOW	protein_coding	ENSG00000068394	49.9318	48.7048	41.9151	44.311	36.1483	40.808	43.0241	44.5777	63.391	63.648
GRIPAP1	protein_coding	ENSG00000068400	30.6563	39.5967	61.2479	49.6139	49.6421	55.0548	59.8553	62.155	44.722	43.9633
FTSJ1	protein_coding	ENSG00000068438	84.5648	88.3839	84.2843	80.3515	93.5229	94.2845	87.1497	94.5359	105.295	112.835
PRR11	protein_coding	ENSG00000068489	336.289	336.717	230.374	271.047	196.44	219.63	240.558	251.552	501.036	569.112
REEP1	protein_coding	ENSG00000068615	0.980883	1.02275	10.0875	10.0895	5.85275	6.92385	2.63377	3.12845	1.41292	1.18264
ATP11A	protein_coding	ENSG00000068650	40.7966	39.0169	56.3952	66.5468	68.9678	61.9991	62.0055	66.8603	64.2898	70.3076
POLR1A	protein_coding	ENSG00000068654	29.786	30.4352	20.8826	24.1184	25.8099	25.5363	31.0159	31.1464	36.5579	38.3714
LAPTM4A	protein_coding	ENSG00000068697	264.511	247.955	229.254	230.234	223.51	212.972	202.351	195.593	202.028	207.415
TTC7A	protein_coding	ENSG00000068724	11.8297	15.135	18.5629	15.0465	17.6506	15.2889	14.8938	16.1586	11.4811	14.5809
IP6K2	protein_coding	ENSG00000068745	41.1125	37.5947	53.4728	51.3718	34.4707	37.8064	64.1891	56.0725	41.1466	40.051
STON1-GTF2A1L	protein_coding	ENSG00000068781	0.029226	0	0.003502	0.014182	0.002457	0.006479	0	0	0.006013	0.013274
SRBD1	protein_coding	ENSG00000068784	14.9002	14.1269	18.5326	19.2274	17.4916	19.4112	20.9765	22.089	26.8975	26.5297
KIF2A	protein_coding	ENSG00000068796	65.7882	63.681	62.3241	63.1025	65.7091	68.9608	74.2542	72.9749	94.1277	94.3254
RASGRP2	protein_coding	ENSG00000068831	0.634669	0.739208	1.52071	2.18159	2.267	2.38903	1.95765	1.30528	0.965875	1.42786
PSME4	protein_coding	ENSG00000068878	83.7634	81.3334	46.6674	50.7489	51.4141	51.3106	51.9333	50.9207	79.3471	81.6166
IFT80	protein_coding	ENSG00000068885	10.8032	10.4738	15.2856	16.9154	16.0877	19.1278	18.2211	18.8791	14.6586	16.7847
SIRT2	protein_coding	ENSG00000068903	10.2002	9.89997	19.7482	21.7215	15.6889	15.2897	12.3876	13.2645	10.1384	10.3437
ERLEC1	protein_coding	ENSG00000068912	70.7829	68.7541	89.5997	88.0581	96.4244	99.2791	91.1811	89.2191	76.7602	77.0398
PPP2R5B	protein_coding	ENSG00000068971	4.16069	3.89828	13.0413	11.1058	5.79561	5.53607	6.455	7.03556	6.72928	7.28914
PYGM	protein_coding	ENSG00000068976	1.00734	1.09278	0.985944	0.91875	1.33617	0.792527	0.762048	1.08588	1.08586	1.40934
PAGE1	protein_coding	ENSG00000068985	0.691765	1.02285	1.82769	0.821118	1.55987	1.45194	1.56768	1.95564	0.689322	0.602891
PITX1	protein_coding	ENSG00000069011	41.4476	42.7956	29.8651	30.3183	22.759	19.0749	14.5484	19.2378	27.4595	30.9971
TRPC7	protein_coding	ENSG00000069018	0	0	0	0	0.153246	0.111612	0.26626	0.09709	0	0
MAST4	protein_coding	ENSG00000069020	8.97515	9.61613	10.0964	11.4792	13.3187	13.5406	9.15621	10.2797	6.9847	8.23434
ADGRF5	protein_coding	ENSG00000069122	0.710925	1.008	1.43725	1.52534	2.55428	3.18526	4.03114	4.04379	0.355417	0.414636
SDK2	protein_coding	ENSG00000069188	2.51917	2.57817	9.7687	9.26721	11.1312	9.74767	9.56361	8.74803	3.70105	4.01269
ADAM7	protein_coding	ENSG00000069206	0	0.007153	0	0	0.009186	0	0.016127	0.008036	0	0
NUP133	protein_coding	ENSG00000069248	28.8116	27.5442	25.2994	27.0914	20.8065	21.9236	24.9254	24.3827	32.3949	33.0558
NUCKS1	protein_coding	ENSG00000069275	148.257	138.78	112.323	121.528	133.325	142.304	142.382	148.033	229.527	215.51
VPS35	protein_coding	ENSG00000069329	58.1678	55.1903	56.4439	60.4834	57.1432	60.0849	64.5686	64.8499	60.7967	51.9707
DNAJA2	protein_coding	ENSG00000069345	101.974	97.1403	66.5887	67.2956	88.4173	98.8394	98.8205	103.309	104.295	111.96
BCL3	protein_coding	ENSG00000069399	15.6921	23.7302	8.4705	8.3277	25.0678	27.3883	11.0903	7.92987	12.5615	21.1117
KCNAB2	protein_coding	ENSG00000069424	10.4287	9.62003	20.4918	20.8643	24.3341	24.0336	21.625	22.6836	13.4562	16.1457
ABCC9	protein_coding	ENSG00000069431	1.07097	1.07641	1.58011	1.52329	1.7667	1.90212	1.17273	1.19421	1.05502	1.04994
GAL	protein_coding	ENSG00000069482	0	0	0.131424	0.355757	0.389937	0.367621	0.358355	0.564239	0.04207	0.092486
CLEC2D	protein_coding	ENSG00000069493	1.53684	2.08249	4.21321	3.68656	3.61628	4.44379	1.98037	4.2174	1.91664	2.22115
FUNDC1	protein_coding	ENSG00000069509	31.9902	30.5225	33.1513	24.0059	21.0884	22.4888	22.935	22.2689	38.1598	37.1511
MAOB	protein_coding	ENSG00000069535	5.78976	4.46368	6.22219	7.18956	13.9042	15.2327	16.5144	15.5656	5.19931	5.55888
RORA	protein_coding	ENSG00000069667	6.09019	8.03146	10.1155	10.7193	7.67457	8.27396	5.37542	5.85179	5.07517	4.64112
DRD4	protein_coding	ENSG00000069696	0.395062	0.269337	0.48696	0.470377	0.78369	0.598458	0.889138	1.09315	0.970282	0.712429
TGFBR3	protein_coding	ENSG00000069702	2.59483	2.49345	3.94909	3.97193	1.2144	1.68372	1.61582	1.4543	1.04164	1.09723
PLA2G10	protein_coding	ENSG00000069764	0	0	0.040143	0.022219	0.0383	0.044567	0	0	0	0
HES2	protein_coding	ENSG00000069812	0	0	0	0	0	0	0.107856	0	0	0
ATP1B3	protein_coding	ENSG00000069849	98.6407	89.3899	141.659	100.203	131.621	94.7502	72.7838	79.2182	84.2537	83.1897
NEDD4	protein_coding	ENSG00000069869	28.8521	27.8687	26.7948	26.5007	27.8681	30.233	27.6302	25.2306	37.274	37.3162
PIGB	protein_coding	ENSG00000069943	9.07641	5.59861	8.87153	10.9934	7.85132	10.48	7.93504	8.80487	6.67251	7.11979
MAPK6	protein_coding	ENSG00000069956	57.932	53.4711	47.7084	50.5576	51.3342	55.9509	53.2116	53.6997	91.0672	84.8062
GNB5	protein_coding	ENSG00000069966	18.2843	17.4388	31.2946	35.5553	21.9697	18.6755	32.1895	17.2546	37.2824	24.5375
RAB27A	protein_coding	ENSG00000069974	15.2105	13.0721	16.1426	17.8456	23.6414	27.4627	20.6444	19.059	8.76624	9.00381
HDHD5	protein_coding	ENSG00000069998	29.3979	26.4881	27.9204	24.5033	22.5312	24.8801	20.6222	21.6543	32.8293	39.9136
UFD1	protein_coding	ENSG00000070010	147.594	148.798	130.254	129.828	113.52	122.011	108.331	110.813	143.815	143.576
LRP6	protein_coding	ENSG00000070018	45.5011	47.5128	60.6966	69.502	40.4045	41.8913	48.7841	50.6918	64.5004	65.1544
GUCY2C	protein_coding	ENSG00000070019	0	0.006245	0	0	0	0.009689	0.031772	0.03906	0	0
SCT	protein_coding	ENSG00000070031	0	0	0.147948	0.159394	0.113443	0	0.029891	0	0	0.071464
PHRF1	protein_coding	ENSG00000070047	35.5877	35.2829	21.2132	21.4792	27.3886	27.4875	28.3595	30.7764	32.9566	33.3887
ELP1	protein_coding	ENSG00000070061	21.5639	20.8634	22.3252	22.8207	19.8945	20.7387	17.4083	19.1435	23.7063	24.0365
NUCB2	protein_coding	ENSG00000070081	109.573	97.1619	143.485	144.278	156.771	161.268	142.64	130.214	110.188	100.315
PFN2	protein_coding	ENSG00000070087	110.161	119.752	127.25	122.998	103.744	111.415	82.6704	83.6295	121.983	112.194
PTPN3	protein_coding	ENSG00000070159	5.2704	4.93708	11.139	10.8909	6.45263	10.4711	8.87959	8.86983	11.6271	9.69498
SPTB	protein_coding	ENSG00000070182	8.3074	8.6674	22.8869	24.0226	26.2109	26.7794	20.1703	20.7569	13.8899	15.163
DAPP1	protein_coding	ENSG00000070190	0.114709	0.068899	0.503873	0.358088	0.411438	0.423338	0.208369	0.241856	0.07973	0.122689
FGF10	protein_coding	ENSG00000070193	0.105745	0.063345	0.104371	0.049019	0.080654	0.063626	0	0.041701	0.057624	0.011564
SLC44A1	protein_coding	ENSG00000070214	6.85691	6.89295	10.5978	10.639	12.0742	11.7201	6.98623	6.50324	7.8899	9.76619
TMEM260	protein_coding	ENSG00000070269	7.69874	7.19143	10.2121	9.72826	9.68922	10.4608	8.9838	10.6122	8.63594	9.44939
SMG6	protein_coding	ENSG00000070366	12.1395	11.9045	23.6715	18.9145	12.8602	23.6545	21.2196	13.1321	14.8103	17.1808
EXOC5	protein_coding	ENSG00000070367	64.1837	62.1404	58.1809	61.0791	53.3704	54.6153	53.6152	53.6363	52.2138	52.4228
CLTCL1	protein_coding	ENSG00000070371	6.9203	6.65944	28.3322	25.9115	17.2688	17.207	13.1289	13.8435	17.1208	16.891
FGF22	protein_coding	ENSG00000070388	0	0	0.041275	0	0.015002	0.014423	0	0.020989	0	0.009727
FSTL3	protein_coding	ENSG00000070404	76.6221	25.8859	144.25	44.2423	56.468	57.6411	115.483	40.4123	101.321	116.4
DGCR2	protein_coding	ENSG00000070413	9.75279	9.79886	26.1325	25.091	20.7535	17.7515	19.1126	19.9073	21.1816	24.2372
RNF126	protein_coding	ENSG00000070423	25.8725	27.1668	27.9966	26.4508	28.6877	27.6079	23.991	24.4509	32.765	38.1058
MNT	protein_coding	ENSG00000070444	20.7216	21.1562	14.8353	12.4751	14.2022	12.6769	7.15614	7.5917	6.80343	7.23074
ZXDC	protein_coding	ENSG00000070476	10.6321	11.2545	18.8288	24.32	12.497	12.3068	12.7197	17.16	10.3114	11.7089
JMJD6	protein_coding	ENSG00000070495	50.3708	49.5462	36.2439	33.274	28.0189	36.3034	50.2766	45.5535	71.9365	85.1716
POLB	protein_coding	ENSG00000070501	34.3455	31.7523	30.3909	27.4168	25.98	30.8119	23.7573	24.3935	34.5532	37.8645
ST6GALNAC1	protein_coding	ENSG00000070526	0	0	0.010149	0.09847	0.01941	0.018025	0.044838	0.086095	0	0
WIPI1	protein_coding	ENSG00000070540	9.40127	11.9064	26.4348	28.8771	20.9804	22.676	17.3073	20.6653	10.3415	11.29
FRMPD1	protein_coding	ENSG00000070601	0.055958	0.048023	0.412325	0.250476	0.189572	0.224815	0.195257	0.123911	0.186211	0.199752
GBA2	protein_coding	ENSG00000070610	44.6383	45.9271	72.5842	69.8582	67.9377	69.3714	80.5754	88.0878	60.5539	58.1545
NDST1	protein_coding	ENSG00000070614	124.928	118.553	126.774	144.444	124.982	114.567	95.052	102.038	156.104	176.044
ASNS	protein_coding	ENSG00000070669	90.8682	77.1768	177.15	193.71	162.522	166.415	109.587	111.039	92.4376	103.44
AP3M2	protein_coding	ENSG00000070718	21.4822	20.7871	28.5014	28.9532	21.1152	23.7486	23.1209	25.0019	20.3807	10.903
CNGB1	protein_coding	ENSG00000070729	0.008294	0.176845	0.305472	0.068598	0.268684	0.201023	0.224937	0.519137	0.10453	0.033885
ST6GALNAC2	protein_coding	ENSG00000070731	0	0	0.018267	0.084416	0.027208	0.022223	0.002333	0	0	0
CHAT	protein_coding	ENSG00000070748	0.127158	0.211059	0.772895	1.11183	1.44039	1.78837	0.487226	0.371753	0.189741	0.231564
PABPC1	protein_coding	ENSG00000070756	1400.26	1085.85	651.805	643.122	627.237	623.226	692.106	764.059	1600.36	994.197
TESK2	protein_coding	ENSG00000070759	3.82973	2.56363	3.43807	3.55058	2.28233	3.15145	4.92012	4.47244	3.82771	3.72066
CFAP20	protein_coding	ENSG00000070761	100.419	96.52	80.5326	77.4318	85.6935	102.46	74.5699	77.0759	84.1498	83.4295
CSNK2A2	protein_coding	ENSG00000070770	106.813	99.5094	74.9078	77.8878	94.8024	104.968	100.195	108.529	146.749	130.95
PTPN21	protein_coding	ENSG00000070778	17.9065	18.8525	31.0888	31.7457	27.4934	30.4031	23.9703	22.8978	35.1073	36.1211
EIF2B3	protein_coding	ENSG00000070785	57.5914	48.7494	41.2866	42.5873	40.6142	43.6346	39.3444	42.6433	53.0502	54.3717
CAMK2A	protein_coding	ENSG00000070808	0.019836	0.017257	0.136319	0.270224	1.04065	1.17416	0.483927	0.570772	0.048781	0.059361
TCOF1	protein_coding	ENSG00000070814	115.772	116.324	90.305	96.2621	113.961	117.238	113.103	122.275	133.965	145.366
CDC42	protein_coding	ENSG00000070831	329.052	304.477	195.985	211.552	193.914	207.695	165.336	176.112	322.05	322.253
OSBPL3	protein_coding	ENSG00000070882	15.9547	16.4462	40.4353	35.3029	33.0777	31.5197	43.5523	48.0814	28.2731	27.994
EPHA8	protein_coding	ENSG00000070886	0.942175	0.898808	1.36559	0.86815	0.867502	0.940826	0.541433	0.304433	1.08565	1.10763
SLC12A3	protein_coding	ENSG00000070915	0.012656	0.104992	0.061373	0.009499	0.37695	0.300645	0.018725	0.097098	0.051525	0.020377
RAD18	protein_coding	ENSG00000070950	13.9369	13.5575	13.0717	12.8331	15.6551	15.848	13.9692	13.8555	14.1691	14.7409
ATP2B1	protein_coding	ENSG00000070961	68.8923	44.28	31.2135	34.2923	47.2914	49.0822	36.5781	39.4599	35.9701	36.7505
TRPM5	protein_coding	ENSG00000070985	0	0	0	0	0.002637	0	0	0.00698	0	0.006454
NCK2	protein_coding	ENSG00000071051	28.6116	29.2525	28.1875	25.3346	23.2534	52.9264	27.7213	26.0361	37.3182	41.7286
MAP4K4	protein_coding	ENSG00000071054	171.919	193.303	154.344	148.377	134.26	177.018	211.292	206.09	187.44	191.5
MGAT4A	protein_coding	ENSG00000071073	1.02468	1.10184	3.09157	3.10098	2.33982	1.3845	1.00761	0.805723	1.59277	1.16954
RPL31	protein_coding	ENSG00000071082	356.218	347.892	270.417	375.225	318.384	313.825	263.629	321.462	412.41	347.766
WDR1	protein_coding	ENSG00000071127	214.985	267.462	154.54	149.608	259.546	210.563	198.482	231.519	234.925	238.959
SNX13	protein_coding	ENSG00000071189	27.5883	28.2707	27.7419	28.4106	24.1721	24.5484	20.3787	24.7674	39.1857	34.2879
MS4A12	protein_coding	ENSG00000071203	0.059368	0	0.167143	0.100768	0.098879	0.069209	0.051509	0.046843	0	0
ARHGAP10	protein_coding	ENSG00000071205	12.4569	13.4505	15.5438	15.3697	9.73384	9.77754	7.88342	9.53545	22.5315	19.7001
RPS6KA2	protein_coding	ENSG00000071242	1.47696	1.60082	5.76017	6.94551	4.51491	5.54742	3.3555	3.10265	3.22911	3.85893
ING3	protein_coding	ENSG00000071243	9.23101	8.4671	7.01104	5.91028	7.10698	7.66727	8.03312	9.04723	11.8885	11.4297
VASH1	protein_coding	ENSG00000071246	5.81628	6.56748	16.7717	17.3107	14.6094	13.1957	9.17997	9.11424	6.05617	6.52799
LMCD1	protein_coding	ENSG00000071282	11.2618	12.6532	38.2153	44.2431	39.0515	48.0408	21.3966	21.1235	12.9656	12.5081
BUD23	protein_coding	ENSG00000071462	167.121	171.199	147.244	148.139	138.775	148.384	127.247	151.031	173.99	155.923
SEL1L	protein_coding	ENSG00000071537	94.9043	84.473	96.2319	83.7725	100.485	97.5823	84.3403	79.0313	90.3952	86.9743
TRIP13	protein_coding	ENSG00000071539	69.965	69.0179	81.9227	86.3193	73.528	85.8663	66.1249	69.5489	103.679	101.854
ATP6AP1	protein_coding	ENSG00000071553	57.5519	57.8288	74.0518	71.6836	68.4643	66.2611	72.8641	52.9112	38.1065	57.8733
TCF3	protein_coding	ENSG00000071564	86.8731	92.3621	66.3093	62.5332	59.207	60.1488	58.3936	58.3613	109.663	121.367
TRIB2	protein_coding	ENSG00000071575	66.1693	63.671	22.5116	21.1125	24.6883	23.9075	25.9064	23.418	30.0113	35.0249
DAZAP1	protein_coding	ENSG00000071626	223.722	231.297	152.075	124.299	151.901	170.04	154.946	167.18	295.436	243.103
MBD3	protein_coding	ENSG00000071655	59.2696	60.3665	60.4006	61.4692	66.7836	60.5759	45.9066	52.9962	76.2538	88.3862
PRLH	protein_coding	ENSG00000071677	0	0	0	0	0	0	0.051593	0	0	0
HLTF	protein_coding	ENSG00000071794	20.333	18.6745	26.1138	28.0464	20.884	19.1437	21.0808	20.6838	24.2054	23.4047
FAM50A	protein_coding	ENSG00000071859	100.199	97.5534	145.499	134.916	122.249	129.583	118.168	128.742	118.872	117.091
FAM3A	protein_coding	ENSG00000071889	9.79886	9.00461	24.294	23.6344	14.6678	18.7037	14.7146	15.4783	11.9099	13.288
CPSF1	protein_coding	ENSG00000071894	102.319	103.942	164.756	141.87	153.509	133.311	162.832	174.145	134.851	149.744
MYO3B	protein_coding	ENSG00000071909	0.049938	0.052892	0.059712	0.104604	0.130449	0.097852	0.085477	0.036697	0.013181	0.015655
CYBRD1	protein_coding	ENSG00000071967	9.61603	10.3134	18.7555	19.7928	21.1411	15.3618	13.3089	12.938	7.75297	6.18759
CDH19	protein_coding	ENSG00000071991	0.082826	0.055783	0	0	0.07329	0.043709	0.150417	0.093317	0.003663	0
PDCD2	protein_coding	ENSG00000071994	47.6765	46.3562	43.7313	43.8947	34.7068	39.1023	29.8175	33.1521	50.7022	49.7654
SLC6A15	protein_coding	ENSG00000072041	5.95344	5.93581	10.1015	8.54058	9.90516	10.6625	10.6349	12.4188	4.2615	4.06686
RDH11	protein_coding	ENSG00000072042	79.2672	74.9636	133.87	128.643	102.91	107.785	134.229	131.258	106.833	86.7616
PRKACA	protein_coding	ENSG00000072062	25.2269	27.5751	50.6444	29.0894	43.8455	46.164	23.648	38.5414	31.297	55.8507
ADGRL1	protein_coding	ENSG00000072071	16.6423	20.3645	21.6242	23.703	21.2907	17.1033	18.4823	19.2927	24.8595	23.1973
SPP2	protein_coding	ENSG00000072080	0	0	0.047136	0	0.084367	0.024113	0	0	0	0
ACTN1	protein_coding	ENSG00000072110	428.462	466.993	345.835	365.501	476.929	511.221	460.943	456.054	520.714	606.335
ZFYVE26	protein_coding	ENSG00000072121	14.9905	14.665	17.2709	19.5423	15.0832	15.4815	18.6354	19.4828	12.5189	13.0104
RPS6KA6	protein_coding	ENSG00000072133	4.78854	4.21672	6.5307	6.96748	8.86503	9.39259	6.53906	5.74527	4.02423	3.82061
EPN2	protein_coding	ENSG00000072134	23.5509	27.7523	28.1077	28.3008	42.526	44.0971	27.0637	25.6331	31.151	35.1713
PTPN18	protein_coding	ENSG00000072135	42.5412	48.0492	94.1842	91.6861	59.5962	64.2915	55.2133	60.7413	51.078	55.9683
LIMS2	protein_coding	ENSG00000072163	2.52726	3.19605	14.5947	13.6464	11.8474	8.16842	6.21042	7.34648	5.63974	7.72811
ASIC4	protein_coding	ENSG00000072182	0.102297	0.065463	0.190021	0.207792	0.339987	0.249382	0.189443	0.105567	0.164503	0.086865
SPEG	protein_coding	ENSG00000072195	16.8924	16.529	58.3805	56.0121	41.754	39.4829	32.5076	36.8928	34.4497	42.9063
LNX1	protein_coding	ENSG00000072201	1.8677	2.49713	6.11889	8.05241	3.32142	3.26204	2.27199	2.11441	3.44471	3.47977
ALDH3A2	protein_coding	ENSG00000072210	22.8944	20.2641	23.446	29.1393	17.1793	21.8682	14.654	14.4662	15.0001	17.432
TFRC	protein_coding	ENSG00000072274	445.286	442.62	226.051	261.154	286.639	259.856	259.651	274.056	310.199	309.837
SREBF1	protein_coding	ENSG00000072310	40.4372	38.4566	80.4286	76.1703	56.7461	52.3439	66.3157	65.1114	50.196	60.858
TRPC5	protein_coding	ENSG00000072315	0	0	0	0	0.001775	0	0	0.004712	0.003965	0
AFF4	protein_coding	ENSG00000072364	127.859	109.061	77.9603	74.2018	84.7385	83.5912	86.5229	77.9748	76.6797	92.3525
UBE2D1	protein_coding	ENSG00000072401	42.5147	38.6885	31.9013	32.8387	31.9243	35.0512	31.376	33.4684	41.764	38.9093
MPP5	protein_coding	ENSG00000072415	63.9165	65.5948	70.2385	77.01	45.4454	46.582	57.3497	57.304	131.451	130.133
RHOBTB1	protein_coding	ENSG00000072422	9.8749	8.93976	23.6176	23.4861	19.2455	14.9797	15.1557	13.4347	14.5213	12.3477
SMC1A	protein_coding	ENSG00000072501	100.271	88.5579	94.2058	88.0643	63.841	88.2868	82.9981	82.8561	119.817	129.618
HSD17B10	protein_coding	ENSG00000072506	147.889	134.575	134.028	128.087	116.918	123.273	100.53	107.65	140.535	157.218
MARK2	protein_coding	ENSG00000072518	24.6191	23.9728	18.2253	19.7819	20.0194	21.9316	21.8399	21.9617	32.1451	30.2746
HMMR	protein_coding	ENSG00000072571	46.7893	45.2348	43.9963	45.0116	50.0279	51.7264	80.9354	71.8946	142.946	133.507
CHFR	protein_coding	ENSG00000072609	9.24074	7.12593	7.15926	7.36634	10.7049	8.49475	8.79594	9.92391	8.50269	6.45888
TRHDE	protein_coding	ENSG00000072657	2.03689	2.13389	2.7765	2.35264	2.88158	2.85214	2.99813	2.81882	2.17058	2.0425
P4HA2	protein_coding	ENSG00000072682	50.3153	44.2281	109.85	112.508	117.396	127.404	126.208	119.995	51.4408	45.5587
FCGR2B	protein_coding	ENSG00000072694	0.010048	0	0.005762	0.021033	0.032342	0.029318	0.027198	0.027732	0.020627	0
NFATC3	protein_coding	ENSG00000072736	16.2297	20.9902	12.8895	16.0985	10.8567	11.5175	19.6306	20.6194	25.7499	23.6816
TRNT1	protein_coding	ENSG00000072756	37.2382	33.4471	27.2899	25.1825	28.6993	29.0931	33.1558	34.1607	39.6988	31.4741
ACADVL	protein_coding	ENSG00000072778	144.019	142.326	185.332	153.337	164.347	178.806	190.853	233.64	148.622	176.933
STK10	protein_coding	ENSG00000072786	35.593	36.4779	24.4753	25.9831	34.4282	36.2909	31.5665	31.9798	34.703	37.404
FBXW11	protein_coding	ENSG00000072803	40.7383	40.2149	40.1498	42.0363	37.162	38.3442	35.5224	35.5585	55.285	54.7416
ACAP1	protein_coding	ENSG00000072818	6.18645	4.77654	11.6063	10.8101	11.5567	10.1341	5.08764	8.30691	3.76488	5.68695
CRMP1	protein_coding	ENSG00000072832	51.9461	53.6097	54.0573	46.8632	49.0119	47.8984	32.1406	40.1239	39.158	43.7046
EVC	protein_coding	ENSG00000072840	4.45386	5.11777	6.86222	8.33724	7.62767	7.65684	6.89335	8.06616	7.0836	6.67801
DERL2	protein_coding	ENSG00000072849	21.6408	26.5127	23.5056	21.5634	24.6152	27.3388	25.6099	28.6803	25.0022	23.7507
SIDT1	protein_coding	ENSG00000072858	0.096659	0.08171	0.095386	0.073189	0.067544	0.099332	0.122808	0.10666	0	0.058553
NDE1	protein_coding	ENSG00000072864	39.3316	39.3951	20.9296	22.0821	25.4292	22.3998	53.2901	49.0723	100.116	109.449
MRVI1	protein_coding	ENSG00000072952	0.003807	0.003913	0.008602	0.017226	0.023072	0.056335	0.049856	0.040493	0	0.004093
TMEM38A	protein_coding	ENSG00000072954	6.1776	6.59785	13.2766	13.1957	10.4835	10.8201	6.75519	6.7385	4.28755	4.3264
AP1M1	protein_coding	ENSG00000072958	15.5629	14.1174	35.3949	34.1283	15.2343	29.5749	21.9818	30.2787	18.5157	18.9361
PVR	protein_coding	ENSG00000073008	35.1226	36.1887	45.8115	57.0666	98.3894	66.9819	66.4995	66.6405	41.9592	44.584
XRCC1	protein_coding	ENSG00000073050	41.4472	49.9638	58.7524	56.3084	53.4179	53.5902	51.5818	66.3108	69.684	61.1965
SCARB1	protein_coding	ENSG00000073060	64.4331	63.3055	73.1364	75.9826	81.7813	74.9002	81.3498	81.9711	62.8688	63.4179
CYP2W1	protein_coding	ENSG00000073067	0	0	0	0	0.004483	0	0.024064	0.098672	0	0.044654
MCM2	protein_coding	ENSG00000073111	115.025	106.252	93.9071	84.086	78.3878	74.9466	48.3511	51.7003	71.8946	72.4933
MOV10L1	protein_coding	ENSG00000073146	0.68399	0.840478	7.16678	6.53294	2.75516	2.59549	3.76917	4.23447	0.799087	0.96866
PANX2	protein_coding	ENSG00000073150	5.49309	4.21202	7.36125	5.2662	5.75692	5.66695	5.52359	4.90347	5.73088	5.33855
SELENOO	protein_coding	ENSG00000073169	16.855	15.716	32.3287	28.3208	27.8004	24.9505	25.024	25.6856	13.3623	17.0489
TP63	protein_coding	ENSG00000073282	0.027374	0.043865	0.201127	0.095342	0.359063	0.240861	0.509568	0.344605	0.021015	0.022285
ALPK1	protein_coding	ENSG00000073331	4.23932	3.50163	8.32184	9.89585	5.83993	5.80166	6.74454	6.62729	14.3564	13.0614
LLGL2	protein_coding	ENSG00000073350	0.369834	0.355962	2.05199	1.88097	0.836413	0.763937	0.584794	0.649263	0.687075	0.889309
PDE8A	protein_coding	ENSG00000073417	29.5291	29.2295	22.7949	21.5712	22.1187	25.266	25.853	26.5451	28.8362	28.0431
CLCN4	protein_coding	ENSG00000073464	5.43433	5.23596	3.9058	4.2633	5.15887	4.93432	3.85345	6.05104	5.41327	4.15465
NLE1	protein_coding	ENSG00000073536	20.599	21.1425	16.8989	15.1115	15.4787	16.081	16.8489	16.7326	21.9193	25.3687
SDHA	protein_coding	ENSG00000073578	62.2794	75.7873	121.412	103.996	80.0998	100.651	85.7317	76.8193	80.6808	76.7622
SMARCE1	protein_coding	ENSG00000073584	64.1115	58.5676	61.4522	56.5687	36.4831	57.91	55.0006	77.2887	64.6369	71.2015
FNDC8	protein_coding	ENSG00000073598	0.033653	0.034704	0	0.048581	0.067069	0.026863	0.019626	0.001388	0	0
GSDMB	protein_coding	ENSG00000073605	7.23702	6.6837	19.0098	14.9479	15.3917	14.3053	15.5706	15.0501	6.20697	6.60089
KDM5A	protein_coding	ENSG00000073614	29.0672	28.5856	21.0495	22.3452	20.0875	20.694	24.4387	26.3157	18.5365	16.8562
ADAM11	protein_coding	ENSG00000073670	2.89583	2.88682	4.00102	2.42733	2.5936	2.90749	2.53196	3.04052	3.01935	3.88721
PPP2R3A	protein_coding	ENSG00000073711	14.7944	15.3235	11.5822	12.1509	17.3948	18.0273	19.4617	16.0829	14.5553	16.4982
FERMT2	protein_coding	ENSG00000073712	75.2274	72.7861	63.1981	67.3626	74.9957	87.5835	64.8421	67.2931	90.7791	90.2174
ABCB11	protein_coding	ENSG00000073734	0.003346	0.003323	0	0	0.017869	0.022441	0.062727	0.051678	0	0
DHRS9	protein_coding	ENSG00000073737	0.142845	0.347919	0.133335	0.14547	0.147267	0.127723	0.209281	0.253995	0.00814	0.064731
CD5L	protein_coding	ENSG00000073754	0	0	0.012308	0.042988	0.077775	0.019546	0.071322	0.134674	0.010636	0.028819
PTGS2	protein_coding	ENSG00000073756	2.16243	2.30379	2.62798	2.63761	2.91597	3.70127	1.03932	1.06176	0.417765	0.334129
IGF2BP2	protein_coding	ENSG00000073792	101.777	108.719	81.029	84.2874	73.218	78.2631	111.204	105.302	111.056	109.936
MAP3K13	protein_coding	ENSG00000073803	39.0055	39.3202	29.9118	32.7628	24.1372	27.9094	20.9358	19.8462	28.7977	28.6182
ST6GAL1	protein_coding	ENSG00000073849	1.48029	1.16775	3.7884	5.45203	4.14294	3.68702	2.87133	2.63949	2.69926	2.91061
TBX21	protein_coding	ENSG00000073861	0.07298	0.044886	0.033236	0.069795	0.261071	0.046873	0.056558	0.063405	0.068262	0.019719
VDAC1P1	processed_pseudogene	ENSG00000073905	2.79339	2.38621	1.32895	1.43389	2.07233	1.65256	1.1562	1.33539	2.78204	2.66114
FRY	protein_coding	ENSG00000073910	0.369836	0.143777	1.0432	1.0489	1.19204	1.05785	1.10156	1.00846	0.292835	0.197154
PICALM	protein_coding	ENSG00000073921	125.737	121.254	98.0166	101.829	134.763	143.839	134.8	152.678	135.873	133.942
NSF	protein_coding	ENSG00000073969	27.0175	33.215	44.0188	36.4449	33.8597	34.4697	34.6888	34.2445	38.1584	38.6982
GLI2	protein_coding	ENSG00000074047	8.93064	11.2983	20.9106	33.1347	22.2988	21.1141	29.4571	24.4638	26.5629	28.6494
CLASP1	protein_coding	ENSG00000074054	32.0108	32.3562	32.693	35.2491	34.3804	33.0929	41.721	42.1994	47.9215	48.1033
MRPS34	protein_coding	ENSG00000074071	256.587	227.682	193.531	183.602	172.868	207.401	178.7	185.452	248.71	244.288
NOTCH3	protein_coding	ENSG00000074181	9.23927	9.50424	31.7164	32.9881	33.4475	27.6201	18.358	17.1782	10.3913	12.1281
CLNS1A	protein_coding	ENSG00000074201	84.2568	79.3069	90.102	101.227	58.409	73.1174	95.3998	92.5908	88.2648	81.7118
PPP2R2C	protein_coding	ENSG00000074211	37.0684	51.8338	48.495	52.6307	48.1117	53.2515	41.1533	41.726	81.2396	81.7773
TEAD2	protein_coding	ENSG00000074219	19.8103	18.9498	33.8646	40.2193	24.934	29.4297	19.7395	25.8491	25.262	32.9318
EED	protein_coding	ENSG00000074266	31.6284	28.553	34.4426	32.8006	31.8587	32.2118	28.266	29.701	17.7061	18.7586
CDHR2	protein_coding	ENSG00000074276	0	0.002621	0.022507	0.027305	0.061649	0.016355	0	0.027913	0.015385	0.005624
SNCB	protein_coding	ENSG00000074317	3.34118	2.8243	4.10135	5.49837	3.43728	3.12218	2.40627	2.19296	5.52531	6.13842
TSG101	protein_coding	ENSG00000074319	38.2708	37.3932	37.536	37.9071	33.7355	36.5734	29.7469	28.8569	44.9666	44.0799
NCBP3	protein_coding	ENSG00000074356	11.624	11.1008	16.1978	16.9295	16.9034	16.7679	18.6177	16.3777	13.3078	13.1992
ATP2A3	protein_coding	ENSG00000074370	0.691795	0.713777	3.80113	3.2925	3.27333	2.66543	1.71504	1.52562	0.793583	0.610314
CA12	protein_coding	ENSG00000074410	4.5998	4.72986	7.54684	6.30467	8.14589	8.81082	10.0595	9.53825	5.95323	5.91629
MGLL	protein_coding	ENSG00000074416	23.6968	23.8207	28.948	31.8999	33.3045	36.6444	31.0455	33.2461	29.4245	33.176
NTN4	protein_coding	ENSG00000074527	6.35344	6.39715	17.1525	15.9928	19.4379	20.4922	14.1613	12.6214	7.70932	8.00166
BCS1L	protein_coding	ENSG00000074582	32.8927	32.3506	30.1393	31.3358	32.5375	31.6274	26.8676	31.5802	30.3331	35.9591
NUAK1	protein_coding	ENSG00000074590	17.2369	17.7432	30.0137	32.2408	21.3697	21.4527	18.9969	21.3733	30.131	31.1047
DPP8	protein_coding	ENSG00000074603	18.7484	17.3881	20.0137	16.401	19.1145	19.9984	18.7555	19.644	20.2693	20.8114
SLC24A1	protein_coding	ENSG00000074621	4.69464	3.90662	5.46226	6.56565	7.26459	6.21706	7.28233	8.70208	5.23982	5.60146
ZNF532	protein_coding	ENSG00000074657	61.3457	64.3677	35.7922	47.3991	45.4578	49.5259	51.6876	49.795	59.742	57.558
SCARF1	protein_coding	ENSG00000074660	0.667671	0.597644	0.592261	0.305319	1.56581	1.80648	1.12359	1.42225	0.339703	0.273921
LMAN1	protein_coding	ENSG00000074695	137.811	132.735	109.526	109.509	117.127	116.476	115.129	112.713	114.298	112.25
HACD3	protein_coding	ENSG00000074696	124.399	114.306	165.452	163.477	144.779	145.832	161.612	147.002	119.652	117.029
IPCEF1	protein_coding	ENSG00000074706	0.00662	0.025129	0.05048	0.103818	0.069616	0.089034	0.023634	0.053244	0.069904	0.00757
ZZEF1	protein_coding	ENSG00000074755	8.36786	7.55933	8.39095	9.07433	8.75178	8.58669	9.59172	10.1667	10.2887	10.1705
NOX3	protein_coding	ENSG00000074771	0	0	0.019081	0	0.015191	0	0	0	0	0
ENO1	protein_coding	ENSG00000074800	2434.58	2561.16	1682.9	1899.19	1631.13	1673.09	1396.17	1551.74	2347.24	2273.89
SLC12A1	protein_coding	ENSG00000074803	0	0	0	0.003131	0	0	0.005616	0.003177	0.0027	0
MYDGF	protein_coding	ENSG00000074842	195.017	178.33	229.674	217.596	225.463	227.778	187.146	204.245	166.08	181.841
ANO8	protein_coding	ENSG00000074855	1.73566	2.11163	10.1187	8.65382	4.72375	4.94817	4.36567	4.63728	3.42825	3.81368
TUBE1	protein_coding	ENSG00000074935	25.9094	26.1058	35.6471	33.0744	22.2363	31.8252	26.6848	27.0414	35.2214	32.0198
ARHGEF10L	protein_coding	ENSG00000074964	3.22351	3.70864	14.0091	12.7194	8.91568	8.6821	6.30486	7.05412	6.09095	6.59384
TXK	protein_coding	ENSG00000074966	0.178061	0.046294	0.45432	0.471517	0.198479	0.268124	0.147913	0.219716	0.108569	0.089861
WSCD2	protein_coding	ENSG00000075035	0.009618	0	0.022768	0.022257	0.249111	0.104667	0.188247	0.09099	0.00832	0.032009
KCNQ2	protein_coding	ENSG00000075043	0.278463	0.542972	0.704284	0.683087	1.40724	1.59553	0.89226	1.60586	0.279462	0.23431
TACR2	protein_coding	ENSG00000075073	0.040223	0.021962	0.061651	0.104987	0.102575	0.179144	0.230243	0.252494	0.027821	0.058247
ACTR6	protein_coding	ENSG00000075089	13.5197	12.7031	11.6133	12.5337	10.4347	12.2815	11.5919	11.8033	13.3948	13.5312
TIPIN	protein_coding	ENSG00000075131	45.0762	47.8234	27.0254	27.4632	23.5623	27.6231	21.6448	20.6589	37.6608	40.8657
SRI	protein_coding	ENSG00000075142	82.7829	77.3671	101.432	93.1931	77.3827	83.5914	60.4734	68.4281	74.0268	79.7113
EIF4G3	protein_coding	ENSG00000075151	20.3392	19.1547	23.7786	25.6275	22.4775	22.2487	31.2082	32.4582	36.0708	35.0675
NUP37	protein_coding	ENSG00000075188	26.9337	27.2707	19.1454	19.4858	17.5302	18.5822	18.7824	24.7673	36.4036	34.0821
SEMA3A	protein_coding	ENSG00000075213	1.80215	2.12087	2.61146	2.34711	7.36456	8.27129	7.80377	8.32847	4.84864	3.42326
GTSE1	protein_coding	ENSG00000075218	59.8574	57.513	95.5199	97.703	87.5092	86.5995	179.708	182.484	241.779	258.897
SEMA3C	protein_coding	ENSG00000075223	28.5774	26.3499	30.3206	29.7004	46.5656	45.9221	76.6003	73.6446	41.6629	42.2498
TTC38	protein_coding	ENSG00000075234	16.7402	16.2883	17.2306	16.848	12.1824	11.8966	15.7259	15.2512	24.0278	22.1538
ACAT1	protein_coding	ENSG00000075239	63.7527	82.1429	65.5314	64.3277	53.743	61.9369	44.5648	49.2622	96.4518	59.8659
GRAMD4	protein_coding	ENSG00000075240	7.92523	6.34724	11.3744	11.1425	12.9812	12.2776	9.24667	10.6319	16.0957	17.7629
CELSR1	protein_coding	ENSG00000075275	0.018559	0.025675	0.202777	0.288713	0.270059	0.164331	0.167122	0.077768	0.194502	0.155551
WNT8B	protein_coding	ENSG00000075290	0	0	0	0	0.01219	0.051975	0.059202	0.037834	0	0
ZNF638	protein_coding	ENSG00000075292	47.574	53.8132	72.3388	73.514	65.2091	66.6391	77.9888	105.055	109.101	97.0921
SLC25A40	protein_coding	ENSG00000075303	7.68081	9.86441	18.7413	21.8646	13.6858	12.1464	12.9233	12.6749	13.4416	12.4735
TIMM21	protein_coding	ENSG00000075336	39.6554	46.0814	30.7289	33.8775	29.3492	29.3807	37.5364	35.823	41.0312	32.6107
ADD2	protein_coding	ENSG00000075340	3.72255	4.65186	4.2718	5.21544	5.4762	5.24625	7.13296	7.7382	5.82621	4.11563
FGF4	protein_coding	ENSG00000075388	0.112706	0.042091	0.135884	0.165542	0.297608	0.234372	0.183389	0.072117	0	0.013387
RASAL2	protein_coding	ENSG00000075391	11.5752	11.9358	19.1409	21.2605	25.3538	24.942	25.3777	24.687	21.9598	21.3633
VPS9D1	protein_coding	ENSG00000075399	3.34944	3.41212	18.9815	14.0867	13.8796	12.9399	14.9102	16.1763	9.27517	11.0846
ZNF37A	protein_coding	ENSG00000075407	18.3221	16.7279	15.2942	16.7239	13.5896	14.0622	15.8876	16.3989	25.5846	27.673
MARK3	protein_coding	ENSG00000075413	42.3287	43.9721	27.2786	30.6371	28.6178	29.7628	35.8733	37.17	40.8467	41.116
SLC25A3	protein_coding	ENSG00000075415	168.972	148.535	149.688	150.487	131.857	145.808	121.008	121.671	174.338	192.656
FNDC3B	protein_coding	ENSG00000075420	38.484	39.5083	29.7081	37.1858	38.6015	42.3962	43.1968	43.2362	42.9748	48.5499
FOSL2	protein_coding	ENSG00000075426	156.223	161.237	77.5399	79.3142	101.318	112.114	64.9117	68.3631	64.9845	69.7338
CACNG5	protein_coding	ENSG00000075429	0.164169	0.495965	0.116236	0.044248	0.122847	0.265333	0.188085	0.130784	0.168551	0.016669
CACNG4	protein_coding	ENSG00000075461	0	0	0	0	0	0	0	0	0	0
FRYL	protein_coding	ENSG00000075539	25.6068	23.7025	28.1267	31.2676	25.568	26.8625	35.8568	33.0412	39.4111	33.4394
TMEM131	protein_coding	ENSG00000075568	36.6966	37.0177	40.7864	42.6276	35.7446	32.4829	41.8752	39.0528	47.6561	46.1155
FSCN1	protein_coding	ENSG00000075618	632.441	645.216	477.904	488.166	647.084	638.928	426.35	490.015	418.072	517.9
ACTB	protein_coding	ENSG00000075624	3311.54	3418.01	2547.11	1638.34	1618.56	2577.09	2238.51	1574.48	3115.78	3953.39
MOCOS	protein_coding	ENSG00000075643	3.52275	3.21624	12.2246	13.0981	8.78353	9.20204	4.11039	4.66257	5.29145	5.37283
PLD1	protein_coding	ENSG00000075651	4.98584	4.77457	16.1762	15.6332	8.00053	7.95813	8.03519	7.69616	8.07468	7.74773
ATP12A	protein_coding	ENSG00000075673	0.023063	0.036314	0.05324	0.031842	0.035797	0.011637	0.021997	0.006462	0.052907	0.032974
WDR62	protein_coding	ENSG00000075702	15.4726	14.7267	33.8985	32.0131	27.9295	24.6416	31.9744	33.1338	42.7232	46.7908
DLG1	protein_coding	ENSG00000075711	76.1153	77.8602	56.6528	62.0892	51.7739	56.0281	76.3784	74.4669	106.88	101.339
RAB7A	protein_coding	ENSG00000075785	207.384	208.441	138.748	145.986	148.273	158.163	157.148	156.026	195.294	201.443
BCAP29	protein_coding	ENSG00000075790	18.0767	19.3545	30.7133	28.6334	22.7504	23.5197	21.9185	22.1872	22.5089	24.2726
SEC31B	protein_coding	ENSG00000075826	1.98603	1.81543	7.78597	4.98896	3.36379	3.35432	4.82617	5.02374	2.42266	2.64031
SART3	protein_coding	ENSG00000075856	48.5353	44.4214	38.4126	41.8193	38.0503	40.5539	49.1754	51.0584	60.5909	63.5423
ARHGAP15	protein_coding	ENSG00000075884	0.22997	0.440014	0.118179	0.144416	0.125735	0.079987	0.368482	0.395413	0.44484	0.453975
TUBA3D	protein_coding	ENSG00000075886	1.29455	1.23266	1.00933	0.887213	0.885019	1.3158	1.11171	0.837379	2.39755	2.30276
PAX2	protein_coding	ENSG00000075891	0.432605	0.486042	2.43738	2.16003	1.72958	1.32824	1.02733	1.01558	0.26991	0.403717
EXOSC7	protein_coding	ENSG00000075914	39.876	43.3732	21.7927	26.1318	24.1414	27.6169	31.1115	27.7954	36.1986	46.7626
KIFAP3	protein_coding	ENSG00000075945	5.18614	4.73356	12.4036	11.7053	12.3933	14.5505	9.24899	11.5787	4.23752	4.69636
MKRN2	protein_coding	ENSG00000075975	21.6751	22.2293	24.1887	25.6065	17.2987	18.8493	20.8706	21.7303	32.3261	30.8712
MCM6	protein_coding	ENSG00000076003	55.2104	52.2641	49.0222	52.5626	41.4972	43.9995	26.1963	26.4294	34.5393	35.5532
REXO2	protein_coding	ENSG00000076043	165.345	163.073	143.04	146.177	120.484	217.993	115.878	191.018	163.086	169.533
RBM7	protein_coding	ENSG00000076053	23.8948	21.3148	19.8592	20.6684	29.7044	29.2437	25.6414	27.8387	36.6722	33.5442
RBMS2	protein_coding	ENSG00000076067	17.0804	17.3802	29.5226	30.4019	25.094	25.6056	32.4564	33.3501	24.1649	22.9135
BAZ2A	protein_coding	ENSG00000076108	45.8057	46.5352	36.7445	40.5776	37.2206	36.0495	45.1567	46.0423	53.9114	58.1925
PTPN23	protein_coding	ENSG00000076201	13.535	14.2826	16.6194	17.3847	18.6179	16.1821	20.3777	20.3135	21.3344	24.8849
MLH1	protein_coding	ENSG00000076242	43.1474	45.0509	42.8473	44.2488	43.6745	46.0505	34.8364	33.706	53.4509	46.7365
UNG	protein_coding	ENSG00000076248	53.5379	43.9847	32.2886	33.9209	24.0482	25.3599	21.1055	15.9817	22.2684	25.6663
FMO4	protein_coding	ENSG00000076258	0.953975	0.995789	2.30584	2.36132	2.20138	2.43805	1.23207	1.34263	0.817574	0.712149
KLHL20	protein_coding	ENSG00000076321	11.8665	11.9209	14.4877	15.1617	11.8474	13.7457	14.8183	14.23	14.8663	15.3932
RGS11	protein_coding	ENSG00000076344	0	0	0	0	0.003249	0	0	0	0	0
SLC46A1	protein_coding	ENSG00000076351	5.00672	4.86234	15.0294	15.9069	13.5238	12.7225	10.5949	11.8264	7.40038	8.96586
PLXNA2	protein_coding	ENSG00000076356	6.5318	7.20064	8.67047	10.1411	21.007	20.1217	11.5675	13.5406	6.64537	6.93943
SPAG5	protein_coding	ENSG00000076382	109.183	101.276	99.1428	105.994	91.0272	97.3569	136.985	137.116	255.293	239.453
ANKRD13A	protein_coding	ENSG00000076513	26.2058	29.5821	19.026	15.9975	50.4127	52.9336	46.5258	52.0985	23.4414	34.5101
TPD52	protein_coding	ENSG00000076554	52.0241	36.2235	49.7734	48.166	31.1854	46.9019	28.4461	44.4849	46.7618	45.5785
ACACB	protein_coding	ENSG00000076555	2.52068	2.12114	3.74198	4.42505	1.8304	2.05919	1.95657	1.28947	1.19046	1.10056
TRAF4	protein_coding	ENSG00000076604	62.275	64.039	69.5521	66.4085	72.2378	76.4077	55.9094	58.0047	33.3389	40.6288
PAG1	protein_coding	ENSG00000076641	1.13904	1.05851	2.34172	2.14092	2.00236	2.01404	1.80119	1.71414	0.553542	0.472896
GPATCH1	protein_coding	ENSG00000076650	8.4534	8.23206	11.5169	11.1716	8.63078	9.12123	10.0657	10.1703	12.8059	12.7866
ICAM3	protein_coding	ENSG00000076662	3.42748	2.04908	2.05051	2.05998	1.98254	2.18785	1.69732	2.14358	2.40502	2.83215
NT5C2	protein_coding	ENSG00000076685	24.6751	30.7902	45.1932	43.7881	31.467	34.5574	45.0567	42.9491	52.7803	54.0848
MCAM	protein_coding	ENSG00000076706	61.8572	62.7516	190.026	188.389	204.596	275.726	201.494	271.059	71.7972	74.7061
GPC4	protein_coding	ENSG00000076716	6.29675	6.13818	23.7015	23.7301	21.2731	18.8793	17.6844	16.4975	8.7327	8.55449
MBNL3	protein_coding	ENSG00000076770	0.751682	0.929832	1.65209	1.3918	1.02529	1.04604	1.00618	0.792721	0.909131	0.698815
CAMSAP3	protein_coding	ENSG00000076826	1.29556	1.64485	3.57348	2.79253	2.15015	1.80876	2.35017	2.13222	3.20754	3.60377
RAP1GAP	protein_coding	ENSG00000076864	2.40417	2.35397	3.95317	3.92091	4.44948	4.98718	3.55915	3.65843	2.99215	3.55932
XAB2	protein_coding	ENSG00000076924	35.7833	34.801	35.187	35.6083	35.6715	36.7599	35.5702	35.5544	44.897	47.7005
ARHGEF1	protein_coding	ENSG00000076928	43.1348	42.8037	63.758	59.2727	65.3421	65.0682	57.5773	61.7163	63.4637	73.3085
STXBP2	protein_coding	ENSG00000076944	19.9966	19.2437	30.9939	24.3673	23.6316	24.4044	23.2181	28.3788	24.7833	27.1773
MAP2K7	protein_coding	ENSG00000076984	11.667	12.4713	12.9554	12.9097	14.3727	13.0372	15.8091	17.544	17.1544	19.7309
NMRK2	protein_coding	ENSG00000077009	0.020881	0	0	0	0.034502	0.058348	0.047833	0	0	0
DGKD	protein_coding	ENSG00000077044	106.354	109.827	63.6871	61.2722	85.6442	95.9765	58.647	67.9586	51.0962	52.1315
CTTNBP2	protein_coding	ENSG00000077063	1.03972	0.930589	1.77651	1.89843	1.58813	2.38019	0.961034	0.939032	0.798881	0.685962
ACTL6B	protein_coding	ENSG00000077080	0	0	0	0	0	0	0	0	0	0
RARB	protein_coding	ENSG00000077092	0.299309	0.358245	1.59002	1.88579	1.16499	1.2041	0.535147	0.685955	0.129975	0.071287
TOP2B	protein_coding	ENSG00000077097	77.186	68.5084	70.6517	78.622	67.6367	69.8474	58.1267	58.5517	78.715	84.2155
TM9SF3	protein_coding	ENSG00000077147	127.709	124.87	93.0653	88.7842	106.365	110.87	119.081	117.276	114.395	110.66
NFKB2	protein_coding	ENSG00000077150	68.5654	69.7239	70.0233	65.2577	122.094	141.325	72.5562	85.8314	62.2476	65.9086
UBE2T	protein_coding	ENSG00000077152	38.3127	33.7411	77.4191	81.6081	73.341	85.8124	60.1988	64.4982	84.4617	93.1179
PPP1R12B	protein_coding	ENSG00000077157	3.327	3.11901	4.68145	4.1237	3.24609	3.84742	5.29101	5.70444	3.31236	3.88513
DNAJC10	protein_coding	ENSG00000077232	78.7186	70.2745	81.5033	79.6752	92.8928	89.4443	74.3418	55.5896	70.7962	75.3343
GTF3C1	protein_coding	ENSG00000077235	56.5128	51.9419	55.1224	61.4608	47.8382	52.5703	56.4419	62.2273	59.6959	64.3006
IL4R	protein_coding	ENSG00000077238	12.9965	12.5342	12.8142	13.385	29.6211	39.0756	10.2135	18.1885	6.8764	8.11446
USP33	protein_coding	ENSG00000077254	35.2428	28.6866	38.3616	38.0488	31.9848	28.3075	39.5773	37.2838	45.0241	40.5364
PAK3	protein_coding	ENSG00000077264	1.28551	1.01824	3.46572	2.975	3.3892	3.60561	3.28438	3.24567	2.47841	2.33797
CAPN6	protein_coding	ENSG00000077274	0.502177	0.418808	1.90169	1.75669	1.37735	1.38564	1.34166	1.19033	0.496919	0.441646
DCX	protein_coding	ENSG00000077279	0.002492	0.007665	0.025795	0.026314	0.022175	0.02043	0.02489	0.029481	0.00247	0.019946
SNRPA	protein_coding	ENSG00000077312	80.2571	85.3077	76.1879	60.2385	59.6148	61.1884	48.0802	43.2754	66.2298	78.6726
SPAG6	protein_coding	ENSG00000077327	0	0	0	0.026482	0.003716	0	0	0	0	0
EXOSC5	protein_coding	ENSG00000077348	25.5159	26.9585	25.6566	22.6481	25.5545	23.3791	17.5784	13.7438	22.701	19.4874
DYNC1I2	protein_coding	ENSG00000077380	137.709	135.149	97.8847	104.714	95.5425	146.94	108.22	104.29	134.738	128.377
APBB1IP	protein_coding	ENSG00000077420	0.058886	0.041581	0.025918	0.019507	0.016766	0	0.004915	0.014829	0.006336	0.047579
LRCH4	protein_coding	ENSG00000077454	13.3441	13.7254	23.9333	25.2522	23.2119	22.9181	20.7929	23.2796	26.7798	33.6616
FAM76B	protein_coding	ENSG00000077458	20.1254	17.4345	20.6163	20.2924	18.3977	20.7743	20.5775	19.3924	17.6372	17.1101
SIRT6	protein_coding	ENSG00000077463	17.4546	18.4515	22.5369	19.233	21.1506	21.24	20.3148	21.3107	16.1919	16.9306
TYR	protein_coding	ENSG00000077498	0	0	0	0	0	0	0	0	0	0
POLD3	protein_coding	ENSG00000077514	16.1985	16.4667	35.7924	34.2817	24.3899	25.3494	18.7724	19.2562	14.1598	14.3232
ACTN2	protein_coding	ENSG00000077522	0.397063	0.537651	0.902236	0.612675	0.776721	0.754093	0.611333	0.585147	0.516678	0.533261
CAPZB	protein_coding	ENSG00000077549	168.487	181.561	141.792	154.437	126.151	119.621	103.235	112.438	174.341	214.62
GPR137B	protein_coding	ENSG00000077585	28.6689	29.5589	23.2626	22.3921	26.9462	26.5243	24.8836	21.9141	14.9108	14.3758
NAALAD2	protein_coding	ENSG00000077616	2.07819	1.60049	6.1332	4.91587	3.75445	4.08636	3.94	2.83352	2.21988	2.10576
JADE1	protein_coding	ENSG00000077684	16.4878	15.4917	18.4205	23.1161	26.0573	29.0143	22.4218	23.9607	32.205	32.7934
SLC25A43	protein_coding	ENSG00000077713	3.67011	4.73059	3.13988	5.19893	4.95415	3.13857	3.1296	2.98457	5.19308	6.14286
UBE2A	protein_coding	ENSG00000077721	18.5757	18.5396	33.8435	32.5826	30.8575	28.2939	27.3411	26.7511	14.1792	17.4613
FGFR1	protein_coding	ENSG00000077782	53.0656	47.9743	54.0736	52.672	54.8098	58.6257	55.5437	51.7821	37.8006	36.1209
FKBP6	protein_coding	ENSG00000077800	0.01994	0.034109	0.040394	0.043555	0.028234	0.045314	0	0.027316	0	0
SMC1B	protein_coding	ENSG00000077935	0	0	0	0	0	0	0	0	0	0
FBLN1	protein_coding	ENSG00000077942	57.0774	54.359	115.76	110.052	109.055	114.604	93.5654	86.2667	70.0004	63.2113
ITGA8	protein_coding	ENSG00000077943	0.023019	0.02125	0.027239	0.096009	0.203559	0.073462	0.164187	0.044058	0.0069	0.016706
CST7	protein_coding	ENSG00000077984	2.52589	1.8813	5.67952	6.45313	7.39172	6.8257	5.27623	5.43645	2.14886	2.45026
MAP2	protein_coding	ENSG00000078018	1.3581	1.34234	6.34791	5.27131	6.18727	8.4815	6.39149	5.95937	2.96444	3.19302
PIAS2	protein_coding	ENSG00000078043	10.3159	8.53825	10.0148	7.80625	6.38642	9.1233	8.87203	8.84418	10.37	11.626
AMPH	protein_coding	ENSG00000078053	12.9696	13.4855	40.3595	39.7676	21.1352	19.555	12.8733	13.0157	19.596	20.6377
ARAF	protein_coding	ENSG00000078061	60.8244	55.2583	60.2578	63.341	62.7271	69.0618	60.2657	61.6858	75.3166	77.8192
MCCC1	protein_coding	ENSG00000078070	17.1391	19.8323	25.369	18.4071	17.4984	22.6218	15.7478	18.196	22.1915	16.5928
LAMP3	protein_coding	ENSG00000078081	1.06276	1.02838	3.84103	4.13446	3.64195	4.25922	3.03063	3.55411	1.0432	0.965061
FAP	protein_coding	ENSG00000078098	2.37443	2.34564	12.001	12.278	12.7918	11.6498	19.088	18.3793	2.64622	1.89563
NEBL	protein_coding	ENSG00000078114	1.83303	1.64137	3.07607	2.59948	3.08027	3.0209	3.09172	2.95011	1.32262	1.24137
ACER3	protein_coding	ENSG00000078124	14.6189	11.1355	22.3804	23.6894	19.8141	18.5964	18.1203	19.3355	14.5789	15.4936
UBE2K	protein_coding	ENSG00000078140	74.7149	76.1899	50.5484	55.5944	50.5619	54.1776	47.3427	51.627	80.3204	76.0646
PIK3C3	protein_coding	ENSG00000078142	13.934	12.9009	8.94548	10.1191	9.9018	7.88368	10.9798	9.20954	5.60025	5.7146
N4BP2	protein_coding	ENSG00000078177	9.90755	9.22258	11.2371	12.5123	12.8061	14.0562	15.5529	15.2611	11.2046	11.8601
TIGAR	protein_coding	ENSG00000078237	71.9515	37.5015	26.1226	52.5342	36.1112	21.2854	41.2919	43.4309	17.5231	34.5519
TULP3	protein_coding	ENSG00000078246	19.0033	19.5133	50.3694	50.8436	27.4953	28.712	25.5195	24.6986	38.6119	41.3026
SYNJ2	protein_coding	ENSG00000078269	34.4676	34.8111	38.4703	40.2844	59.8307	65.0749	31.7205	38.6825	40.7913	45.4303
ADCY2	protein_coding	ENSG00000078295	0.430627	0.674638	1.41335	1.21445	2.19058	2.17506	1.76183	1.57347	0.558402	0.560054
PPP2R5C	protein_coding	ENSG00000078304	61.7723	59.2975	46.7837	41.3057	39.1723	47.2299	42.5653	50.742	62.3869	53.4614
PMS2P1	unprocessed_pseudogene	ENSG00000078319	16.7725	15.5532	17.024	19.6013	14.5687	15.6898	10.9978	11.4488	22.3656	25.1401
RBFOX1	protein_coding	ENSG00000078328	1.0453	0.693855	2.02172	2.67288	1.97009	1.88212	1.92086	1.98065	1.83156	1.40039
GNB1	protein_coding	ENSG00000078369	214.145	216.545	127.774	124.171	126.147	143.17	136.962	135.37	224.891	226.567
HOXA9	protein_coding	ENSG00000078399	35.6826	28.7944	21.5153	26.4485	16.3277	14.5779	12.1849	17.0413	25.0623	19.3604
EDN1	protein_coding	ENSG00000078401	22.3216	23.9101	20.3877	17.9225	24.3436	27.9224	27.2976	31.7352	7.90344	8.99925
MLLT10	protein_coding	ENSG00000078403	22.8882	23.9929	19.7331	19.7844	18.9398	19.6462	29.1058	27.6771	50.0182	47.7542
ZCWPW1	protein_coding	ENSG00000078487	3.58713	3.17594	4.88338	4.5122	4.74101	4.08538	3.70237	4.75731	4.51838	4.39631
ADCYAP1R1	protein_coding	ENSG00000078549	0.94333	0.892296	1.75143	1.39848	1.73369	1.82347	1.04441	1.29225	1.20345	0.83455
FGF20	protein_coding	ENSG00000078579	0.041244	0.067251	0.202246	0.087123	0.225091	0.115598	0.032222	0.025138	0.068708	0
P2RY10	protein_coding	ENSG00000078589	0	0	0	0	0	0	0	0	0	0
ITM2A	protein_coding	ENSG00000078596	0.026124	0	0.056857	0.059129	0.055708	0.044377	0.066179	0.024199	0	0
NRDC	protein_coding	ENSG00000078618	136.565	129.649	98.8908	104.856	88.7012	89.6003	99.4511	100.431	164.955	163.543
VDAC3	protein_coding	ENSG00000078668	223.636	203.834	192.952	198.648	160.466	170.825	121.229	129.215	241.418	252.261
PCM1	protein_coding	ENSG00000078674	42.1827	37.8856	45.4405	45.2783	34.4833	39.7908	44.7707	41.6286	56.8984	55.7881
TNRC6C	protein_coding	ENSG00000078687	2.26417	2.81623	2.83752	2.91337	2.7057	2.73989	2.92352	2.97664	3.32274	3.45908
CBFA2T2	protein_coding	ENSG00000078699	5.79651	4.57301	7.87277	7.74278	5.97518	5.0186	6.49446	7.3819	7.44516	7.20652
BRINP1	protein_coding	ENSG00000078725	6.69605	6.20786	8.22964	8.85494	5.33882	6.42557	3.95058	4.11188	1.4353	1.58693
ITCH	protein_coding	ENSG00000078747	47.6996	45.4329	38.2456	42.0192	37.4137	41.1689	47.2641	43.8485	57.5733	58.4434
PKD2L2	protein_coding	ENSG00000078795	0.149484	0.194147	0.4636	0.451644	0.0223	0.087611	0	0.248474	0.199229	0.045772
TP53INP2	protein_coding	ENSG00000078804	9.52546	10.2923	27.8823	28.4984	26.0448	22.5744	16.5914	14.9776	6.48925	7.02433
SDF4	protein_coding	ENSG00000078808	112.545	104.092	103.988	97.0033	112.204	118.174	112.014	112.183	93.2888	115.275
MYH7B	protein_coding	ENSG00000078814	0.075224	0.089964	0.215106	0.113102	0.19924	0.199986	0.252335	0.175478	0.303184	0.133505
BPIFB2	protein_coding	ENSG00000078898	0	0	0	0	0.005387	0	0	0	0	0
TP73	protein_coding	ENSG00000078900	1.56027	1.74212	11.921	10.9188	8.30772	6.76257	2.48048	2.5394	1.5583	1.63911
TOLLIP	protein_coding	ENSG00000078902	13.724	14.0165	14.7278	10.6691	12.6953	13.401	9.6201	10.1009	13.8435	14.037
UBE2D4	protein_coding	ENSG00000078967	10.9265	11.8448	19.1606	20.3141	13.7471	13.7751	9.93669	10.8099	14.8896	15.48
CLUL1	protein_coding	ENSG00000079101	0.207918	0.023903	0.212836	0.205196	0.197717	0.400542	0.011049	0.175956	0.027853	0.075499
RUNX1T1	protein_coding	ENSG00000079102	0.056422	0.109722	0.273359	0.311112	0.108194	0.159221	0.083075	0.089869	0.005285	0.063254
CDH17	protein_coding	ENSG00000079112	0	0.006478	0	0	0	0	0	0	0	0
THOC1	protein_coding	ENSG00000079134	58.3307	55.4032	52.4311	50.839	48.2238	51.3562	60.8197	59.2219	63.2627	64.784
FKBP7	protein_coding	ENSG00000079150	11.3613	10.0782	13.0069	10.7921	14.1386	14.2957	12.2953	12.9804	10.0957	9.22811
OSBPL6	protein_coding	ENSG00000079156	9.54092	10.1181	17.7837	19.3193	13.4565	13.5467	9.11361	9.2166	10.9504	11.0303
SLC1A3	protein_coding	ENSG00000079215	28.3766	23.8562	31.6152	30.5703	29.4466	27.3204	29.8103	27.7106	15.1824	14.3797
XRCC5	protein_coding	ENSG00000079246	364.505	338.503	263.065	275.707	265.109	283.59	259.75	261.356	348.022	329.852
LXN	protein_coding	ENSG00000079257	0	0	0	0	0	0	0	0	0	0
SP140	protein_coding	ENSG00000079263	14.24	13.9871	12.3993	12.738	16.3729	19.9613	21.3081	20.8605	8.90486	7.98081
MKNK1	protein_coding	ENSG00000079277	2.00703	2.42458	2.26503	1.52641	3.95107	3.49211	2.86613	3.02447	1.42845	1.66159
TNS1	protein_coding	ENSG00000079308	24.1202	26.796	27.4329	30.5025	39.3035	38.7964	29.967	32.4877	18.8693	21.338
REXO1	protein_coding	ENSG00000079313	11.4478	11.9567	18.8797	18.1527	19.2175	18.4337	21.5545	21.0952	33.3785	40.14
SAR1A	protein_coding	ENSG00000079332	54.5945	55.6157	42.5839	42.7026	44.8065	48.8654	99.7877	100.797	54.1289	52.0426
CDC14A	protein_coding	ENSG00000079335	9.67735	9.8044	8.24529	7.6277	6.71378	6.83203	8.57136	8.41352	6.60795	5.60552
RAPGEF3	protein_coding	ENSG00000079337	1.58511	1.55118	4.71083	3.51161	3.2001	3.77368	2.70937	3.7128	1.27803	1.42466
CEACAM1	protein_coding	ENSG00000079385	0.107469	0.120877	1.23286	1.65105	1.17786	1.10974	1.47875	1.47351	0.023179	0.01434
SENP1	protein_coding	ENSG00000079387	21.4594	23.4367	26.3141	26.0985	21.9467	24.1833	26.4256	26.0108	20.4546	19.2332
DUSP13	protein_coding	ENSG00000079393	0.017553	0	0.015124	0.03197	0.070616	0.111664	0.075635	0.046376	0	0
CIC	protein_coding	ENSG00000079432	39.7866	41.8485	63.684	65.3767	51.0254	48.3649	46.3257	49.9364	62.2632	70.0523
LIPE	protein_coding	ENSG00000079435	5.54549	7.20046	3.77702	4.57175	5.327	4.84477	6.46334	6.98973	15.6977	18.4663
FDFT1	protein_coding	ENSG00000079459	70.8273	71.8742	107.179	101.227	94.2677	89.4369	112.037	102.839	122.358	125.301
PAFAH1B3	protein_coding	ENSG00000079462	44.9571	42.4476	54.8534	55.4511	45.8147	49.2186	37.8904	37.4907	46.5132	52.6398
OPHN1	protein_coding	ENSG00000079482	2.70798	2.5467	5.39975	5.99848	3.81726	4.02909	4.76989	5.33767	5.20881	5.31934
AFM	protein_coding	ENSG00000079557	0	0	0	0.01295	0.038621	0.018028	0	0	0.01694	0.017062
KIF22	protein_coding	ENSG00000079616	67.8318	64.8066	86.1516	80.5889	88.2971	102.647	117.246	117.569	153.575	159.227
SCGN	protein_coding	ENSG00000079689	0	0	0	0	0	0	0	0	0	0
CARMIL1	protein_coding	ENSG00000079691	4.5303	4.48444	8.1042	8.79447	10.771	11.1728	6.36598	6.35412	6.47839	6.86152
PGM1	protein_coding	ENSG00000079739	26.6458	26.3553	62.8786	62.2021	53.0378	54.0394	38.3274	38.8226	34.5519	35.6052
DDX1	protein_coding	ENSG00000079785	209.353	192.481	126.486	133.886	128.349	139.833	142.831	147.602	202.295	196.156
DNM2	protein_coding	ENSG00000079805	57.9417	54.4569	40.1923	40.3096	38.6381	41.4488	49.2626	50.2316	74.1286	80.1184
EPB41L2	protein_coding	ENSG00000079819	200.717	205.679	164.199	174.328	115.046	193.332	149.165	226.194	251.812	201.636
RIMS1	protein_coding	ENSG00000079841	0.183909	0.227887	0.343505	0.360659	0.550225	0.508451	0.278469	0.240632	0.244913	0.314884
MOXD1	protein_coding	ENSG00000079931	15.8254	14.3935	36.7048	35.3797	35.1528	35.5217	27.474	27.1361	17.248	17.9785
STX7	protein_coding	ENSG00000079950	11.414	10.5564	12.8434	11.2719	9.42215	9.02267	8.67007	9.42628	13.4954	13.5593
RABL2B	protein_coding	ENSG00000079974	17.8278	17.8519	25.163	22.0782	24.8754	36.2717	23.2425	28.0541	17.9785	19.6887
KEAP1	protein_coding	ENSG00000079999	25.4027	23.3011	27.9088	36.5853	26.4533	35.5447	26.9734	24.4606	35.6647	38.3598
DDX43	protein_coding	ENSG00000080007	20.8232	19.5512	12.307	11.9703	15.8561	18.5899	13.4917	13.7695	17.5165	17.5878
PTPRH	protein_coding	ENSG00000080031	2.41848	2.81964	8.44205	10.4174	4.04893	5.86291	2.91302	3.92335	3.35576	4.4571
DCT	protein_coding	ENSG00000080166	0.025854	0.023765	0.025568	0.052103	0.199457	0.286195	0.561417	0.651665	0	0
SLC35C2	protein_coding	ENSG00000080189	30.9125	31.7078	43.7691	40.9807	39.286	45.6389	38.0312	39.8699	37.2656	43.2937
CRYBG3	protein_coding	ENSG00000080200	11.4308	10.8955	15.9223	18.2644	15.7828	16.1092	13.5325	13.3368	13.6846	13.4368
EPHA6	protein_coding	ENSG00000080224	1.44649	1.49732	4.21108	3.42648	2.93148	3.78313	2.18155	3.28813	2.12602	2.38151
SCTR	protein_coding	ENSG00000080293	0	0	0	0.010109	0	0.01628	0.031841	0	0	0
RFX3	protein_coding	ENSG00000080298	2.21328	2.51569	3.80292	3.17445	3.35872	3.40706	2.86	2.59466	4.76468	4.2689
RIF1	protein_coding	ENSG00000080345	46.6417	42.689	29.0588	32.5021	36.1875	36.5536	42.2385	42.4137	31.4396	29.1724
RAB21	protein_coding	ENSG00000080371	7.70007	8.17937	5.98529	5.96678	7.29061	7.25894	7.67001	9.42232	7.37763	7.12133
SLC4A4	protein_coding	ENSG00000080493	0.393029	0.379828	3.13149	3.43989	1.97533	2.99931	1.62329	1.6928	0.190938	0.113391
SMARCA2	protein_coding	ENSG00000080503	19.5127	19.0195	37.1812	37.956	22.9817	23.4373	20.618	21.1927	16.8198	16.8774
RDH8	protein_coding	ENSG00000080511	0.204074	0.393952	0.065463	0	0.892485	1.05061	0.694949	0.497587	0.013589	0
SESN1	protein_coding	ENSG00000080546	13.9389	10.5402	13.2777	13.4465	6.50833	5.57599	7.57412	9.8101	5.72621	5.47928
MID2	protein_coding	ENSG00000080561	1.94772	2.49878	3.76797	3.93355	3.0392	2.99862	2.64299	3.3225	3.03274	3.54972
PIH1D3	protein_coding	ENSG00000080572	0.01176	0	0	0.005166	0	0.019187	0	0	0.003279	0
COL5A3	protein_coding	ENSG00000080573	10.491	9.99733	12.5795	13.388	19.2883	20.2976	16.9706	20.1692	6.32624	7.70841
SRCAP	protein_coding	ENSG00000080603	57.6763	65.2303	30.8526	38.8945	49.3694	47.771	51.4355	54.651	58.0462	61.8938
PUM3	protein_coding	ENSG00000080608	70.8567	67.9009	42.1883	45.657	50.7103	57.4591	72.096	76.5636	88.3608	81.5637
CPB2	protein_coding	ENSG00000080618	0	0	0	0	0	0.014494	0	0	0	0
CHRNA3	protein_coding	ENSG00000080644	1.26714	1.43772	4.43711	3.95655	3.51489	2.92834	2.64077	2.79586	0.712081	0.797151
KCNN2	protein_coding	ENSG00000080709	1.14467	1.14689	1.05283	1.00428	0.905558	0.545625	0.719292	0.615346	0.562733	0.535868
CNOT4	protein_coding	ENSG00000080802	11.7388	13.8052	13.2089	11.576	9.94959	8.98229	18.1565	13.7006	17.4369	14.3462
PSEN1	protein_coding	ENSG00000080815	62.1305	57.1424	51.7129	51.7346	56.4368	56.14	62.2972	61.6011	50.2267	49.2056
CPOX	protein_coding	ENSG00000080819	33.6836	31.7484	40.933	42.8769	33.3349	37.1328	46.1527	48.0183	38.4657	39.1706
CLDND1	protein_coding	ENSG00000080822	95.6922	97.2223	158.04	115.546	127.829	141.942	104.067	155.877	84.3163	76.1297
MOK	protein_coding	ENSG00000080823	12.9622	16.2051	19.7673	18.1605	23.0941	22.7914	23.9215	31.736	18.5608	18.3021
HSP90AA1	protein_coding	ENSG00000080824	1601.37	1467.79	688.447	718.621	789.265	867.59	939.523	983.2	1915.93	1632.35
RBL1	protein_coding	ENSG00000080839	11.0864	10.9863	13.436	15.9846	15.4563	15.7732	14.7029	14.2882	5.68774	6.04017
DLGAP4	protein_coding	ENSG00000080845	37.1802	42.5351	79.2524	80.4704	88.0758	111.733	89.4031	72.263	84.2608	78.3818
IGSF9B	protein_coding	ENSG00000080854	2.96402	3.79311	3.86524	5.47563	5.73994	4.64589	4.00453	5.05788	3.27526	3.99942
CFHR2	protein_coding	ENSG00000080910	0	0	0	0	0	0	0.020559	0	0	0
CROCCP3	transcribed_unprocessed_pseudogene	ENSG00000080947	2.90725	1.94775	5.66381	5.74182	4.03825	2.93899	5.13829	4.10894	2.28669	3.17129
NDC80	protein_coding	ENSG00000080986	67.0051	57.0169	135.34	134.077	95.1997	104.526	218.745	207.983	310.576	291.851
AP4E1	protein_coding	ENSG00000081014	7.31338	7.81389	7.64688	6.3457	8.63061	4.92032	8.34451	7.59024	4.60541	7.03696
RSBN1	protein_coding	ENSG00000081019	5.96293	5.55707	5.77859	7.07621	6.03629	10.4351	9.94414	10.0212	8.19101	8.19666
MAGI3	protein_coding	ENSG00000081026	13.8314	13.8554	13.9595	15.9013	9.51306	9.8409	10.7929	9.92224	15.7991	16.0045
CXCL2	protein_coding	ENSG00000081041	0	0.034631	0	0	0	0	0.056667	0	0	0
AFP	protein_coding	ENSG00000081051	12.0387	10.6464	13.3583	12.144	11.5455	14.4035	12.2846	11.8276	13.3531	11.7025
COL4A4	protein_coding	ENSG00000081052	1.47161	1.44741	8.10758	9.01522	6.44349	6.07406	4.11302	4.48972	1.98563	2.11569
TCF7	protein_coding	ENSG00000081059	0.148616	0.098659	0.10463	0.301483	0.446799	0.980026	0.344044	0.315897	0.007448	0
OSTM1	protein_coding	ENSG00000081087	12.6222	12.4863	13.9499	14.9386	15.6225	15.7941	12.3115	13.3087	10.6596	11.099
CDH7	protein_coding	ENSG00000081138	0.059584	0.077988	0.171673	0.158143	0.228322	0.282187	0.162926	0.147807	0.001899	0.059819
IMPG2	protein_coding	ENSG00000081148	0.046632	0.058838	0.183874	0.160418	0.111449	0.131005	0.180255	0.187856	0.08153	0.065022
PCNP	protein_coding	ENSG00000081154	88.8042	90.0302	68.0913	71.0474	65.2617	67.1034	56.0236	58.9769	88.6294	90.0077
EXD2	protein_coding	ENSG00000081177	12.8157	15.5813	16.4599	16.888	11.9724	8.56818	13.4809	12.1349	19.1937	23.0692
ARG2	protein_coding	ENSG00000081181	30.8915	26.6756	41.1072	37.6418	26.7947	29.1231	16.1966	17.5091	25.7689	24.9524
MEF2C	protein_coding	ENSG00000081189	2.7899	2.59034	2.12758	1.72503	1.63933	3.05988	0.859392	0.73471	1.43394	1.00627
PTPRC	protein_coding	ENSG00000081237	0.131427	0.235363	0.320406	0.138124	0.398715	0.319201	0.532407	0.58512	0.231258	0.269673
CACNA1S	protein_coding	ENSG00000081248	0	0	0.003288	0	0.006633	0.004031	0.004374	0	0	0
PKP1	protein_coding	ENSG00000081277	0	0	0	0	0.007597	0.03616	0.005001	0.007544	0	0
UBA5	protein_coding	ENSG00000081307	32.5717	34.9286	24.3707	23.2366	22.6424	24.8008	26.0861	26.2714	27.5715	25.8664
STK17B	protein_coding	ENSG00000081320	10.4872	9.21787	11.0141	9.79913	12.4913	13.2624	24.1879	23.7922	11.3668	11.6251
CDC14B	protein_coding	ENSG00000081377	11.9715	12.0577	9.32372	10.1776	11.3081	10.6918	9.38365	10.4789	12.8293	11.5187
ZNF510	protein_coding	ENSG00000081386	8.95553	8.20919	9.4267	9.89752	8.36445	8.65284	10.0165	9.22638	12.4501	13.0336
LRP2	protein_coding	ENSG00000081479	0.016663	0.013672	0.023774	0.015862	0.010932	0.013172	0.009438	0.022373	0.001459	0.003176
ZNF506	protein_coding	ENSG00000081665	0	0	0.003253	0	0.002486	0	0	0	0	0
JMJD4	protein_coding	ENSG00000081692	4.49699	6.65692	5.62307	5.41956	5.81211	5.41031	7.25185	8.00765	6.21887	7.16443
DUSP12	protein_coding	ENSG00000081721	54.7701	52.0539	39.7255	36.4278	36.7994	43.488	47.7792	47.0671	50.0378	48.5026
AACS	protein_coding	ENSG00000081760	32.4739	31.0147	33.9063	32.1917	39.1304	37.9274	35.1715	41.8368	28.615	30.7605
DELE1	protein_coding	ENSG00000081791	26.7415	26.0034	38.3452	32.8942	35.5506	35.8653	41.8114	43.2941	38.4664	43.5466
SLC13A1	protein_coding	ENSG00000081800	0	0	0	0	0	0	0	0	0	0
CADPS2	protein_coding	ENSG00000081803	1.17872	1.15656	4.2351	4.67221	3.16839	3.09612	2.0116	1.9889	2.11365	2.32033
PCDHB4	protein_coding	ENSG00000081818	0.247269	0.276642	0.573502	0.522842	0.38367	0.325171	0.270934	0.254464	0.294342	0.337083
PCDHA6	protein_coding	ENSG00000081842	1.26229	5.20973	5.4273	1.78211	1.13595	4.15934	5.56079	1.53398	1.67556	2.38951
PCDHGA2	protein_coding	ENSG00000081853	0.503786	0.940218	0.51102	0.520669	0.391409	0.547133	0.4558	0.357924	0.544212	0.434483
HSPB11	protein_coding	ENSG00000081870	75.7901	74.1197	123.837	131.272	112.732	105.211	76.3897	79.1239	80.0515	76.4169
PHLPP1	protein_coding	ENSG00000081913	7.57142	7.84697	6.12884	6.99596	3.65656	3.76055	3.28369	3.33794	3.61979	3.72578
ATP8B1	protein_coding	ENSG00000081923	2.38149	2.56183	4.09376	4.05386	1.44034	1.68739	1.97606	1.91044	6.41058	6.62744
IL12RB2	protein_coding	ENSG00000081985	0	0	0	0	0	0	0	0	0	0
SMARCD3	protein_coding	ENSG00000082014	7.41652	8.56649	10.5533	8.65075	9.00083	8.60955	8.8202	8.70087	10.1223	10.2112
WDR70	protein_coding	ENSG00000082068	24.2915	22.5325	19.6081	20.1808	17.3636	18.6034	20.9697	22.3025	38.3759	36.4693
FYB1	protein_coding	ENSG00000082074	0.013855	0.018391	0.01125	0.011313	0.052793	0.058098	0.01596	0.018648	0.017603	0.009396
MPP4	protein_coding	ENSG00000082126	4.28809	3.81415	4.32538	4.58735	4.96659	5.59777	6.73182	6.44636	3.66629	3.55486
STRADB	protein_coding	ENSG00000082146	17.623	17.7403	29.027	29.88	19.3473	21.5256	13.7817	15.2108	18.8622	20.3404
BZW1	protein_coding	ENSG00000082153	154.106	155.888	111.923	114.548	133.874	145.434	91.9473	105.341	136.21	128.961
PGR	protein_coding	ENSG00000082175	0.015026	0.003364	0	0.001966	0.000427	0	0	0.001995	0	0
C1QTNF3	protein_coding	ENSG00000082196	0.902797	1.01861	2.04245	1.40836	1.17654	1.09784	1.8131	2.52311	1.46496	1.13523
ME2	protein_coding	ENSG00000082212	51.6211	18.3487	42.9026	29.0854	24.3921	27.3363	25.6053	18.438	23.736	32.406
C5orf22	protein_coding	ENSG00000082213	25.293	27.8719	27.925	30.4611	17.6762	18.699	23.5978	25.1465	27.8972	28.0361
CCNT2	protein_coding	ENSG00000082258	15.7547	15.5866	10.5267	10.0203	11.8726	12.4264	16.8032	15.4901	8.36158	9.56488
FAM135A	protein_coding	ENSG00000082269	9.89995	8.99414	14.0094	12.9382	10.3075	9.82961	10.6644	12.8977	13.9306	13.2805
COL19A1	protein_coding	ENSG00000082293	0.310179	0.368235	0.336173	0.238703	0.69951	0.736149	0.842363	0.966688	0.056229	0.15601
EPB41L3	protein_coding	ENSG00000082397	146.171	146.081	116.051	119.098	93.9345	106.008	65.5225	67.1856	154.813	150.023
COBLL1	protein_coding	ENSG00000082438	5.04627	4.36303	14.0273	11.6877	8.92659	9.69555	8.85472	6.17028	4.4861	4.93057
DLG3	protein_coding	ENSG00000082458	3.82034	4.08069	5.62843	5.79151	7.68011	9.22127	6.59981	6.11179	4.66776	4.85318
KCNK2	protein_coding	ENSG00000082482	0.437218	0.333398	0.430624	0.580349	0.574311	0.790114	0.25504	0.273299	0.236597	0.329251
SERTAD4	protein_coding	ENSG00000082497	18.3133	15.8369	32.0208	32.0739	20.1552	21.0464	23.6169	23.5467	46.0323	42.7455
TRAF5	protein_coding	ENSG00000082512	11.0106	10.4926	23.1106	20.5219	18.9891	18.6182	13.9941	16.5533	10.603	10.3138
MRPL22	protein_coding	ENSG00000082515	38.8726	33.5871	22.9272	23.0558	21.6008	24.6187	21.2324	23.0889	34.6673	34.4244
GEMIN5	protein_coding	ENSG00000082516	54.5451	54.0788	28.4509	30.7311	39.6624	43.5718	39.909	43.0223	44.3966	42.1767
OPRK1	protein_coding	ENSG00000082556	0.060952	0.136053	0.43953	0.326419	0.115677	0.128873	0.119271	0.07472	0.153148	0.334641
NFE2L1	protein_coding	ENSG00000082641	115.323	65.3599	96.8505	138.608	78.2851	93.2339	95.8743	99.056	158.514	114.17
SEMA5B	protein_coding	ENSG00000082684	0	0.014557	0.044371	0.021915	0.139039	0.003082	0.068594	0.067539	0.013972	0.005123
GSK3B	protein_coding	ENSG00000082701	41.5001	41.386	26.4428	27.8395	21.768	23.0994	29.0847	29.5012	46.5362	43.3302
ITGB5	protein_coding	ENSG00000082781	309.043	300.127	312.667	303.801	363.841	379.056	335.728	356.166	262.363	278.845
ERC1	protein_coding	ENSG00000082805	14.8639	17.092	20.0321	20.5352	18.1871	27.296	23.9072	40.5454	30.7986	42.0064
XPO1	protein_coding	ENSG00000082898	265.798	238.982	152.45	154.628	161.845	158.411	221.207	223.086	218.096	214.754
LINC01587	processed_transcript	ENSG00000082929	0	0.036531	0	0	0.017895	0	0	0	0	0
RNF13	protein_coding	ENSG00000082996	17.6875	9.5987	8.33831	15.2059	6.68051	11.3724	7.82874	12.0158	12.9046	14.0469
TRPM3	protein_coding	ENSG00000083067	0.018384	0.008173	0.111644	0.083239	0.07637	0.09	0.037133	0.055546	0.012301	0.038627
PALB2	protein_coding	ENSG00000083093	22.6453	22.7253	13.2671	14.6729	16.5118	16.8882	13.0392	14.7754	13.3075	13.4092
DOP1A	protein_coding	ENSG00000083097	1.61514	1.20318	4.12024	3.58983	3.19056	3.46266	2.53731	2.47606	1.45889	1.4132
LYRM2	protein_coding	ENSG00000083099	24.2723	22.3952	20.5013	22.4847	18.1569	18.9116	19.562	20.3866	25.1495	24.2954
BCKDHB	protein_coding	ENSG00000083123	5.5157	5.02512	8.4751	10.8517	6.79435	9.39095	5.65928	5.42525	6.91877	7.43407
KAT6A	protein_coding	ENSG00000083168	13.2295	14.9835	8.28985	11.7037	11.5194	11.257	19.312	23.3242	11.6552	11.6736
TUT7	protein_coding	ENSG00000083223	21.8913	21.6353	12.7545	15.8177	13.7406	14.3406	19.5612	18.3666	15.1453	16.3073
ULK2	protein_coding	ENSG00000083290	0.701476	0.817024	2.97201	3.62838	2.00332	2.10919	1.26712	1.16383	1.0288	1.10422
GRHL2	protein_coding	ENSG00000083307	0	0	0	0.010317	0	0	0	0.005235	0	0.00484
TNPO1	protein_coding	ENSG00000083312	183.753	155.512	140.984	135.244	100.551	109.501	124.122	162.28	179.735	221.238
PLOD1	protein_coding	ENSG00000083444	223.728	212.795	244.161	258.649	267.669	244.15	245.483	248.218	214.223	228.946
P2RX5	protein_coding	ENSG00000083454	5.74148	5.20212	4.53949	5.52507	6.94764	5.28916	5.95617	7.50215	3.59937	3.68672
ITGAE	protein_coding	ENSG00000083457	31.1498	27.0198	32.1616	27.8489	25.9695	31.8109	23.9124	25.3797	32.8759	32.4839
DIS3	protein_coding	ENSG00000083520	25.1689	25.0082	17.6443	14.1646	14.018	16.9511	17.9112	17.365	20.2335	18.2945
PIBF1	protein_coding	ENSG00000083535	11.9737	11.3346	7.27964	7.53781	8.00379	8.55293	7.4585	7.72252	13.2066	12.909
TDRD3	protein_coding	ENSG00000083544	5.41853	5.05305	5.9756	6.00773	5.06053	5.37148	8.12716	7.85373	11.1321	11.1619
AC000061.1	antisense	ENSG00000083622	0	0	0	0	0	0	0	0	0	0
NUFIP1	protein_coding	ENSG00000083635	12.7973	13.4652	7.32365	7.47958	8.17867	8.98632	9.83047	10.1413	14.7454	13.7651
PDS5B	protein_coding	ENSG00000083642	27.8579	25.3786	18.7072	19.7506	15.9727	16.7681	22.9576	21.3986	35.6167	32.1886
OXCT1	protein_coding	ENSG00000083720	73.4874	71.6346	102.816	109.675	99.0782	104.727	73.8308	72.8722	74.3501	70.8157
RRAGB	protein_coding	ENSG00000083750	14.7767	12.7609	9.889	9.36076	7.45571	8.41501	10.1487	9.88074	9.32321	9.65711
EPYC	protein_coding	ENSG00000083782	0.014819	0.046871	0.080262	0	0.059007	0.058927	0.035047	0.017522	0.015092	0
CYLD	protein_coding	ENSG00000083799	24.151	21.814	20.999	21.426	23.5969	25.1003	15.9431	16.5899	11.4403	10.7062
SLC27A5	protein_coding	ENSG00000083807	3.94169	3.64526	5.24274	4.57536	3.65231	3.43181	2.95812	3.7727	4.37052	4.24624
ZNF324	protein_coding	ENSG00000083812	3.14528	2.38713	2.09212	2.01372	2.5051	6.21666	1.73524	1.48276	1.3445	1.40666
ZNF671	protein_coding	ENSG00000083814	2.26725	3.96462	4.98939	3.85128	2.87987	2.73135	3.92804	5.48676	2.21181	1.40527
ZNF416	protein_coding	ENSG00000083817	5.81589	5.91936	2.71087	2.76795	3.05428	2.86531	3.55792	3.42715	1.28446	1.28916
ZNF586	protein_coding	ENSG00000083828	6.64198	6.86964	5.00354	5.45703	3.43714	3.41101	5.08602	5.17922	6.50979	5.30227
ZNF446	protein_coding	ENSG00000083838	2.45829	1.88084	5.36278	3.55472	3.74477	4.0446	3.87632	4.24976	3.35251	3.87262
ZNF264	protein_coding	ENSG00000083844	4.56068	5.83524	8.37152	6.66146	4.93943	4.26016	5.36562	5.55551	1.12284	2.42745
RPS5	protein_coding	ENSG00000083845	412.554	494.028	433.623	447.79	401.293	492.897	274.413	312.312	384.048	406.088
FAT1	protein_coding	ENSG00000083857	73.8063	52.4042	83.5338	93.8567	72.7168	66.8502	84.4194	77.9864	86.8736	91.7815
YTHDC1	protein_coding	ENSG00000083896	88.5209	86.0873	63.8679	64.6141	57.2532	61.4804	79.6341	86.9941	92.1045	86.0831
CHMP2B	protein_coding	ENSG00000083937	33.9475	23.0395	20.091	20.384	22.697	25.2864	25.7661	19.209	20.4154	23.0283
SMAP2	protein_coding	ENSG00000084070	37.9003	37.9801	36.7261	33.6842	35.8439	38.2137	26.9243	29.6916	26.9773	28.5055
PPIE	protein_coding	ENSG00000084072	52.406	50.0481	43.3803	45.2966	41.3172	41.4964	37.598	38.2596	54.4591	58.2636
ZMPSTE24	protein_coding	ENSG00000084073	107.177	103.507	73.4704	71.4834	96.0405	95.9775	110.466	106.237	103.065	97.8049
STARD7	protein_coding	ENSG00000084090	84.7933	81.5035	114.043	116.46	98.6585	105.255	91.2863	94.6353	128.98	127.409
NOA1	protein_coding	ENSG00000084092	29.8031	29.4724	31.5163	30.9799	24.7261	24.6822	26.489	26.7802	38.1834	40.9905
REST	protein_coding	ENSG00000084093	22.0123	20.7235	7.49786	7.69641	14.7233	35.1018	4.97642	6.51352	5.97831	7.53157
HAL	protein_coding	ENSG00000084110	0.04572	0.033933	0.369921	0.383062	0.253885	0.175791	0.303683	0.378101	0.050398	0.032725
SSH1	protein_coding	ENSG00000084112	5.13276	9.33591	19.2607	21.2165	20.4683	21.4317	14.3031	13.3494	14.2122	15.9043
GSTP1	protein_coding	ENSG00000084207	556.846	571.403	791.041	785.673	655.832	698.986	515.541	501.574	649.137	731.164
APLP2	protein_coding	ENSG00000084234	187.4	178.466	325.752	292.417	327.548	316.839	300.949	284.996	206.412	191.018
FAM234B	protein_coding	ENSG00000084444	3.9826	3.71029	6.46386	6.60154	6.23184	4.8755	4.17452	5.48534	4.7807	4.4048
SLCO1A2	protein_coding	ENSG00000084453	0.470019	0.288409	1.73896	1.53207	0.706792	0.981997	0.959113	0.698945	0.372257	0.309877
WBP11	protein_coding	ENSG00000084463	116.8	121.978	81.7412	89.8756	79.333	83.265	93.7506	92.8668	151.593	144.878
EIF3I	protein_coding	ENSG00000084623	395.563	386.784	307.524	318.052	298.868	324.067	257.866	286.531	318.997	373.406
NKAIN1	protein_coding	ENSG00000084628	0.116955	0.212475	0.195102	0.245316	0.194319	0.308644	0.271505	0.208438	0.157529	0.202803
COL16A1	protein_coding	ENSG00000084636	47.9477	44.3494	117.608	104.607	114.279	114.584	111.456	130.79	53.545	53.9727
TXLNA	protein_coding	ENSG00000084652	77.2688	77.5951	75.4095	76.8231	81.3616	83.9153	79.042	84.5542	78.6025	82.624
APOB	protein_coding	ENSG00000084674	0.008275	0.002297	0.01494	0.014774	0.023082	0.015737	0.00771	0.019434	0.001634	0
NCOA1	protein_coding	ENSG00000084676	13.1013	12.862	14.8768	16.097	13.0435	11.6214	14.2592	15.5816	16.4285	16.4925
AGBL5	protein_coding	ENSG00000084693	39.1912	42.4098	50.3036	61.1449	43.078	45.858	36.9084	40.3668	49.804	51.2401
EFR3B	protein_coding	ENSG00000084710	2.2209	2.11196	15.0044	14.9273	6.28321	13.4674	10.8386	12.4425	8.95838	4.75206
KIF3C	protein_coding	ENSG00000084731	17.6454	17.6921	32.5934	37.5172	26.6016	27.488	22.6286	21.3654	20.596	22.5877
RAB10	protein_coding	ENSG00000084733	73.2519	76.0293	78.9697	82.5457	82.2452	89.0828	94.1686	94.1958	66.8718	65.6652
GCKR	protein_coding	ENSG00000084734	0	0.040773	0	0	0.174929	0.136516	0.024923	0.025308	0.050839	0
HADHA	protein_coding	ENSG00000084754	214.072	194.059	195.771	200.737	186.619	193.498	175.536	171.626	203.507	196.203
MAPRE3	protein_coding	ENSG00000084764	7.99605	7.86722	26.127	26.95	16.0966	25.7021	21.8537	15.4696	15.5261	17.4507
CAD	protein_coding	ENSG00000084774	51.6362	53.565	61.4785	68.4231	67.5634	63.5335	62.4814	73.1614	66.0735	69.0652
CD59	protein_coding	ENSG00000085063	110.305	107.546	107.376	106.719	170.871	170.206	149.787	166.817	72.6869	72.1134
CD82	protein_coding	ENSG00000085117	12.6392	12.3082	18.3498	23.3767	48.9622	47.6082	30.1422	33.9467	5.78369	6.15628
BCORL1	protein_coding	ENSG00000085185	4.83238	4.82557	8.21421	8.66803	6.57165	6.05881	6.08068	5.93558	4.29855	4.87743
ATRX	protein_coding	ENSG00000085224	59.8915	61.2555	57.6371	61.1845	47.2285	50.2497	47.2063	44.5298	79.7425	77.1774
AK6	protein_coding	ENSG00000085231	33.344	37.1663	23.7138	23.851	30.8784	29.1073	29.5808	40.2413	64.7215	51.6128
FCN1	protein_coding	ENSG00000085265	0	0.005476	0	0	0.006164	0	0	0.006298	0	0
MYNN	protein_coding	ENSG00000085274	10.0296	10.5451	6.83538	6.87512	7.62248	9.19289	8.54571	9.05907	10.711	10.5123
MECOM	protein_coding	ENSG00000085276	10.5666	11.1915	10.6235	9.50972	8.94753	10.1033	9.5347	8.46607	9.86214	10.3379
SCAMP1	protein_coding	ENSG00000085365	16.6955	11.0436	14.8696	15.2623	21.5568	16.3912	20.718	14.0204	18.1033	11.2902
PREP	protein_coding	ENSG00000085377	50.027	48.6139	32.4821	32.5415	33.2938	35.4538	41.3997	41.4673	54.9215	52.2186
HACE1	protein_coding	ENSG00000085382	4.28643	4.32306	8.74005	7.23116	5.08201	4.92539	4.26989	4.30349	5.25771	5.78022
SEH1L	protein_coding	ENSG00000085415	132.429	132.095	75.2068	80.1159	102.315	114.531	88.8937	96.5998	156.175	192.932
WDR47	protein_coding	ENSG00000085433	8.47016	8.71697	10.0754	10.1537	10.503	11.4347	11.6417	10.329	11.8901	11.3089
WDFY1	protein_coding	ENSG00000085449	82.9296	81.7256	75.8387	73.5339	71.5188	76.4732	110.496	114.202	94.7308	92.86
OVGP1	protein_coding	ENSG00000085465	1.66304	1.78228	0.545361	0.754429	0.891224	1.1672	1.04099	1.24313	1.32711	1.34439
SLC25A24	protein_coding	ENSG00000085491	34.7442	32.5194	35.8981	39.3186	35.8461	44.192	39.8596	39.715	47.7605	53.8223
MAP3K4	protein_coding	ENSG00000085511	23.7265	32.5835	20.9128	17.7665	20.329	25.3065	23.4288	22.7588	33.408	30.5136
PILRA	protein_coding	ENSG00000085514	2.59557	2.7875	3.31842	2.84487	2.7796	2.29984	2.49102	2.51756	2.99848	3.11986
IGSF9	protein_coding	ENSG00000085552	4.24162	4.546	11.8747	9.16363	6.70899	5.21142	7.76002	6.98838	4.91272	5.10962
ABCB1	protein_coding	ENSG00000085563	19.7055	25.6932	16.8068	22.3455	25.8859	23.6744	12.9591	16.3231	10.6596	10.4484
ZNF213	protein_coding	ENSG00000085644	7.73058	8.91766	5.42906	7.70545	8.41436	9.10888	7.25061	7.33589	6.91943	7.08601
AKR1B1	protein_coding	ENSG00000085662	103.863	106.496	133.794	137.621	122.199	125.362	88.1447	93.1341	113.106	121.572
CPNE3	protein_coding	ENSG00000085719	52.6385	50.3039	71.2371	72.9949	65.8604	67.1275	51.6565	52.5504	60.3848	58.7052
RRN3	protein_coding	ENSG00000085721	35.1503	32.0084	24.3587	24.4206	25.133	28.0503	30.3287	32.6324	39.8753	39.4674
CTTN	protein_coding	ENSG00000085733	145.265	148.304	164.123	154.035	168.535	183.149	210.393	226.414	166.984	165.749
WNT11	protein_coding	ENSG00000085741	0.5398	0.598281	5.41071	5.76302	3.2598	2.06792	1.30429	1.17013	0.463105	1.38417
MTIF2	protein_coding	ENSG00000085760	82.5785	77.1226	58.6957	60.7945	48.0598	56.3617	54.5733	58.0253	94.9658	91.8616
DDHD2	protein_coding	ENSG00000085788	20.9066	16.8312	19.1163	26.9015	15.9396	20.3142	20.1435	22.4748	14.7613	19.2916
TTC39A	protein_coding	ENSG00000085831	1.83747	1.98502	5.23956	5.62333	3.91525	3.64862	2.44821	2.24751	3.06259	3.27364
EPS15	protein_coding	ENSG00000085832	18.221	19.5983	27.6576	30.1269	27.7881	28.4617	23.2058	22.9356	29.382	28.2669
ORC1	protein_coding	ENSG00000085840	36.6999	35.3975	29.6836	31.4325	21.5868	22.1065	19.9906	21.9859	20.4554	20.8962
MGST2	protein_coding	ENSG00000085871	22.6764	19.3641	49.0812	39.4377	31.2784	36.6972	35.1022	34.2907	16.5537	19.5671
CHERP	protein_coding	ENSG00000085872	38.069	40.6407	27.3861	27.3734	28.3151	29.503	34.1273	34.0901	53.1372	57.7772
ATG16L1	protein_coding	ENSG00000085978	28.4308	23.0852	20.1588	10.8332	10.1809	19.0226	23.186	14.9217	19.9336	12.6322
USP40	protein_coding	ENSG00000085982	23.0307	25.9237	23.3956	24.0472	25.092	24.8724	25.7954	25.1881	36.1703	33.0798
POMGNT1	protein_coding	ENSG00000085998	66.1391	58.4951	67.0331	80.5127	71.5271	77.2564	59.8164	62.8282	68.5427	72.1712
RAD54L	protein_coding	ENSG00000085999	13.0896	15.469	30.3426	33.3317	34.421	33.0276	34.2343	38.0235	30.5935	20.6852
MAST2	protein_coding	ENSG00000086015	40.067	41.1831	72.4389	71.4261	54.2391	52.732	54.5263	56.3419	62.3471	69.695
DNAJA1	protein_coding	ENSG00000086061	658.415	611.633	406.665	418.673	498.491	537.964	672.622	702.828	922.273	864.483
B4GALT1	protein_coding	ENSG00000086062	59.125	60.2531	89.4541	90.4449	122.832	129.532	84.1616	83.6312	56.8739	59.9816
CHMP5	protein_coding	ENSG00000086065	135.13	128.377	104.283	112.898	110.301	122.038	95.1066	101.469	142.301	115.459
NFX1	protein_coding	ENSG00000086102	42.7081	43.4922	45.7823	44.1378	47.7254	50.5549	43.6821	46.494	48.9896	50.8007
AQP6	protein_coding	ENSG00000086159	0	0.018658	0.01572	0.01031	0.083987	0.048432	0.056377	0.027468	0	0
DIMT1	protein_coding	ENSG00000086189	51.0145	51.3584	36.2112	34.3123	39.5744	46.8545	36.5598	39.0295	47.0803	45.4214
IPO11	protein_coding	ENSG00000086200	41.1971	32.7592	21.5442	22.5723	24.4642	27.071	28.5124	23.5553	46.5039	36.6199
FOLH1	protein_coding	ENSG00000086205	0.767393	1.11343	2.24325	2.08769	1.76865	1.84682	1.75859	1.44396	0.828619	1.01218
EIF2AK1	protein_coding	ENSG00000086232	146.061	165.899	155.748	134.066	139.719	147.608	137.714	125.926	194.139	192.719
NME8	protein_coding	ENSG00000086288	0	0	0.012473	0.026183	0.002226	0	0.023469	0	0	0
EPDR1	protein_coding	ENSG00000086289	21.5566	21.7712	53.907	52.4657	41.6087	37.7941	24.2505	24.6131	23.0693	26.9248
SNX10	protein_coding	ENSG00000086300	6.94957	2.95182	10.1802	11.6332	8.7825	8.78266	11.345	5.18858	5.0757	4.63058
SEPHS1	protein_coding	ENSG00000086475	73.8642	79.4884	67.3752	64.5239	50.9176	49.712	50.3045	64.6523	84.1953	85.6791
MRPL28	protein_coding	ENSG00000086504	153.406	156.117	154.409	155.157	158.218	159.989	131.005	139.686	182.953	209.553
HBQ1	protein_coding	ENSG00000086506	0	0	0	0	0	0	0	0	0	0
ITPKC	protein_coding	ENSG00000086544	16.944	16.3313	13.3896	12.2621	18.9074	19.7403	15.4224	15.8752	12.8333	14.2644
CEACAM6	protein_coding	ENSG00000086548	0	0	0.039084	0	0.011514	0	0.020145	0.020178	0	0
FAT2	protein_coding	ENSG00000086570	0.009679	0.014678	0.07593	0.078385	0.118908	0.116556	0.119648	0.092313	0.003185	0.013237
RBM22	protein_coding	ENSG00000086589	70.3358	70.8544	66.6668	73.2682	51.1394	51.9446	67.4944	66.2532	69.1222	71.106
TMED2	protein_coding	ENSG00000086598	253.465	243.499	185.161	181.043	194.745	126.639	196.903	189.868	145.465	221.362
ERO1B	protein_coding	ENSG00000086619	7.59521	6.80157	5.25425	4.57664	5.11051	5.66646	4.03334	4.39217	2.41456	2.70607
ZFAND6	protein_coding	ENSG00000086666	36.9084	34.001	37.5888	35.2743	36.5979	49.0237	36.1842	36.0747	33.533	39.6539
HSD17B2	protein_coding	ENSG00000086696	0.495406	0.642366	0.098402	0.043204	0.53467	0.729317	0.556315	0.64497	0.058534	0.069062
TXLNG	protein_coding	ENSG00000086712	23.6387	23.1756	14.5685	15.5245	17.4873	19.3373	20.6145	21.2983	25.1388	22.4998
PPEF1	protein_coding	ENSG00000086717	0.02419	0	0	0	0.049567	0.060036	0.018789	0.04751	0.024084	0
LAT2	protein_coding	ENSG00000086730	20.5421	18.2317	49.7361	46.5465	43.4131	45.8716	34.8411	36.9393	21.1942	24.9223
HUWE1	protein_coding	ENSG00000086758	93.3704	95.1669	73.4254	89.4918	93.0721	80.9252	118.356	120.18	123.88	126.758
ZW10	protein_coding	ENSG00000086827	57.3112	55.5588	47.5157	49.5727	41.9462	44.0845	41.4646	42.0306	64.6028	63.6883
ALG9	protein_coding	ENSG00000086848	17.9155	22.8004	27.0402	23.9479	25.4569	24.4779	26.4439	31.4525	21.2363	22.7264
MYBPC2	protein_coding	ENSG00000086967	0.01609	0	0.099094	0.068355	0.304677	0.213787	0.212076	0.16629	0.019731	0.020209
NOX4	protein_coding	ENSG00000086991	1.51917	1.65486	9.31405	9.08715	6.67206	6.9165	5.80105	4.42712	3.19175	2.6215
ACOX3	protein_coding	ENSG00000087008	3.92365	4.19657	6.25867	6.94954	6.04331	7.4325	5.74563	6.29035	4.11166	4.63291
MTMR2	protein_coding	ENSG00000087053	80.1761	76.439	42.2171	43.0329	47.2293	52.6512	45.6627	48.7945	77.0575	76.938
PPP1R15A	protein_coding	ENSG00000087074	87.5689	92.9327	44.0288	42.8091	41.2118	53.066	47.0509	56.4982	50.9271	50.7607
HSD17B14	protein_coding	ENSG00000087076	6.39435	5.94332	14.8359	12.7961	11.8401	11.1536	10.5434	11.1616	6.93527	7.56508
TRIP6	protein_coding	ENSG00000087077	81.9612	81.297	128.209	116.011	89.2488	91.5062	81.8118	94.4987	112.226	126.491
ACHE	protein_coding	ENSG00000087085	4.83961	4.77452	6.70302	6.35147	8.97066	8.27732	6.55932	7.15127	2.82356	3.54563
FTL	protein_coding	ENSG00000087086	1815.74	1878.89	1996.38	2098.22	1828.36	1930.14	1377.63	1501.1	2444.25	2564.64
SRRT	protein_coding	ENSG00000087087	197.73	202.449	127.827	130.266	122.383	117.588	136.716	154.795	202.434	216.667
BAX	protein_coding	ENSG00000087088	223.618	227.93	321.955	303.632	233.795	239.409	172.322	207.415	228.762	250.552
NLK	protein_coding	ENSG00000087095	36.9039	36.0448	29.432	28.531	28.4102	31.8511	32.1976	33.5848	34.3943	36.5888
PIGS	protein_coding	ENSG00000087111	33.3064	37.6631	59.7558	57.0236	52.8553	48.3268	45.6087	45.0177	43.2191	41.8398
ADAMTS2	protein_coding	ENSG00000087116	2.17239	2.26338	11.2818	11.0201	10.2293	10.0602	7.29397	6.53473	3.16169	3.6579
TMPRSS11E	protein_coding	ENSG00000087128	0	0.011276	0.012625	0	0.069809	0.063967	0.012753	0.050541	0.032622	0.011872
ATXN7L3	protein_coding	ENSG00000087152	92.8767	88.285	70.3339	74.9184	88.6476	85.0148	68.4158	77.5948	94.5477	104.09
PGS1	protein_coding	ENSG00000087157	15.7224	15.9619	26.5082	26.6691	19.9898	19.6208	20.7472	20.5866	13.7328	15.4382
PSMC5	protein_coding	ENSG00000087191	397.515	388.141	267.115	265.831	249.939	246.558	236.982	264.941	422.535	412.064
UIMC1	protein_coding	ENSG00000087206	24.665	22.3821	28.3311	27.6881	25.1777	30.3338	28.4664	28.052	36.6715	34.1044
CETP	protein_coding	ENSG00000087237	0	0.047097	0	0.041124	0.035324	0.014064	0.030217	0	0.013012	0
MMP2	protein_coding	ENSG00000087245	156.101	177.719	320.063	293.383	285.817	272.549	244.464	239.363	157.965	176.485
MT3	protein_coding	ENSG00000087250	0	0	0	0.034873	0	0	0	0	0	0
LPCAT2	protein_coding	ENSG00000087253	0.172064	0.096556	0.207783	0.168175	0.2344	0.136962	0.076964	0.145093	0.091796	0.129431
GNAO1	protein_coding	ENSG00000087258	7.03695	5.71142	11.5606	13.2612	8.21815	6.80347	4.54972	3.13797	8.71514	8.20488
OGFOD1	protein_coding	ENSG00000087263	46.3189	51.2662	29.2329	28.9997	41.7809	35.9064	37.2599	30.2325	27.8424	43.9831
SH3BP2	protein_coding	ENSG00000087266	7.60234	5.80515	15.4796	12.4409	11.7171	14.1583	7.35606	6.79045	6.19216	8.26393
NOP14	protein_coding	ENSG00000087269	70.3126	67.5732	28.2389	24.6384	36.4776	37.0019	41.0139	45.0317	68.5518	67.4775
ADD1	protein_coding	ENSG00000087274	66.3597	49.3792	56.9295	58.0171	52.7645	53.2226	57.2633	56.5925	96.1718	78.92
L2HGDH	protein_coding	ENSG00000087299	16.2288	16.3835	30.6474	32.2636	23.9021	30.5898	20.3564	23.7221	20.0939	23.5267
TXNDC16	protein_coding	ENSG00000087301	4.19581	3.72534	7.06195	7.68069	6.85849	7.08387	5.77861	5.25164	2.5505	2.58989
RTRAF	protein_coding	ENSG00000087302	392.069	380.97	229.641	247.518	269.376	244.697	266.962	292.073	447.99	376.686
NID2	protein_coding	ENSG00000087303	0.624731	0.768928	1.06242	0.836569	2.09864	1.89645	2.82349	2.3352	0.245989	0.597348
GMCL1	protein_coding	ENSG00000087338	34.3646	33.6312	40.4414	39.065	29.3724	32.4315	23.6776	23.5424	26.0858	25.9397
SF3B2	protein_coding	ENSG00000087365	264.82	261.568	198.55	194.646	191.123	203.725	207.702	205.936	281.811	280.146
KLHL42	protein_coding	ENSG00000087448	17.7591	16.5015	23.1819	22.9154	20.1912	20.718	13.8584	15.9138	7.13567	7.47847
GNAS	protein_coding	ENSG00000087460	699.924	710.744	750.335	730.834	701.975	719.758	508.766	646.748	756.357	475.209
DNM1L	protein_coding	ENSG00000087470	76.0433	64.8871	78.0715	78.0397	68.8998	77.9635	82.4174	82.17	88.2562	79.856
PTHLH	protein_coding	ENSG00000087494	12.7484	12.5449	10.4592	6.85698	14.7667	18.1747	9.12972	9.04709	4.73993	3.13921
PHACTR3	protein_coding	ENSG00000087495	0.854875	1.05083	3.59847	3.66003	2.1594	2.75386	1.8204	1.90541	0.949192	0.898356
ERGIC2	protein_coding	ENSG00000087502	74.9126	71.6213	57.8637	59.0724	62.9536	60.0322	59.6036	55.7459	68.8349	66.002
TFAP2C	protein_coding	ENSG00000087510	0.109855	0.18181	0.023491	0	0.031681	0.060597	0.033901	0.042681	0.016209	0
AURKA	protein_coding	ENSG00000087586	63.3279	88.4971	78.4676	76.0611	76.8618	84.634	284.814	260.631	317.07	471.114
CASS4	protein_coding	ENSG00000087589	1.75537	2.03323	0.543501	0.73091	1.80861	2.42022	2.03063	1.89411	0.458478	0.624797
PIR	protein_coding	ENSG00000087842	8.52558	9.13694	15.4414	15.1337	11.0374	11.794	7.68076	8.93272	14.1626	15.1024
AAMDC	protein_coding	ENSG00000087884	21.5244	21.4992	20.0165	20.7992	17.597	18.2286	15.4092	17.6476	18.751	17.9736
RFX2	protein_coding	ENSG00000087903	8.61403	8.72964	12.1981	12.8599	8.3804	8.3156	7.09187	7.93756	12.215	15.7884
METTL2A	protein_coding	ENSG00000087995	44.8754	43.702	40.5488	38.8917	35.2465	36.6777	34.0075	34.6137	48.8715	50.8319
SULT2B1	protein_coding	ENSG00000088002	0.112992	0	0.16058	0.252168	0.289831	0.31814	0.06451	0.133872	0	0
ALG6	protein_coding	ENSG00000088035	8.97972	7.61821	11.9562	11.731	10.4329	9.36538	8.32872	9.06047	8.63953	9.75013
CNOT3	protein_coding	ENSG00000088038	43.8958	45.2416	37.8187	39.0636	36.7372	39.8878	42.3212	40.5892	76.5443	71.4605
GP6	protein_coding	ENSG00000088053	1.0475	1.14659	10.5675	11.6031	5.77976	5.02162	3.22657	2.98941	2.04431	2.5261
PTPN4	protein_coding	ENSG00000088179	6.54173	6.27439	7.68648	8.0021	6.78228	5.5364	6.83864	6.61526	7.12403	6.60474
DDX18	protein_coding	ENSG00000088205	166.327	158.876	77.2423	84.7982	94.1358	103.844	98.1138	104.079	159.967	150.134
KHSRP	protein_coding	ENSG00000088247	364.797	392.129	241.638	265.256	253.913	261.057	272.696	284.739	497.487	500.587
GNA11	protein_coding	ENSG00000088256	55.1099	56.3455	43.5498	45.301	38.5695	37.9579	31.5909	33.46	55.6375	60.0902
ASAP3	protein_coding	ENSG00000088280	5.08746	4.88373	21.052	16.2314	16.1456	14.5607	15.3508	16.91	14.4532	14.5524
EDEM2	protein_coding	ENSG00000088298	37.2404	33.756	52.1744	49.9158	49.2031	50.024	45.6024	42.4373	38.3849	40.234
DNMT3B	protein_coding	ENSG00000088305	3.54563	3.59334	15.1411	19.8289	8.82148	9.17689	19.4156	22.3788	19.6194	22.5182
REM1	protein_coding	ENSG00000088320	0.042317	0	0.066683	0	0.144298	0.059568	0.08175	0.15383	0	0.026937
TPX2	protein_coding	ENSG00000088325	223.614	207.118	175.425	184.379	161.853	174.013	371.812	349.834	639.084	626.304
FER1L4	transcribed_unitary_pseudogene	ENSG00000088340	0.400293	0.39332	1.71667	2.00022	3.05912	3.73925	5.24386	6.89617	1.05762	1.197
PDRG1	protein_coding	ENSG00000088356	25.859	25.3628	33.1991	32.1406	28.8376	30.3743	30.8895	35.891	45.1313	51.7099
EPB41L1	protein_coding	ENSG00000088367	46.8182	47.5381	44.9187	58.9076	45.9134	53.6457	41.6916	50.6513	54.0182	55.3302
SLC15A1	protein_coding	ENSG00000088386	0	0	0	0	0	0.014482	0.026194	0	0	0
DOCK9	protein_coding	ENSG00000088387	9.81991	9.6819	13.5258	11.942	14.4406	14.8995	10.1338	12.2043	14.7268	14.1947
ANKRD10	protein_coding	ENSG00000088448	117.37	120.487	100.948	97.652	95.22	85.7722	109.489	111.402	30.3821	32.4671
TGDS	protein_coding	ENSG00000088451	36.2309	32.2928	21.2641	21.5489	23.5646	26.9854	17.3053	18.7069	29.1001	30.6004
DOCK3	protein_coding	ENSG00000088538	0.613667	0.635498	3.03233	2.71975	1.5399	1.47975	1.77584	1.90268	2.09824	1.91173
C3orf18	protein_coding	ENSG00000088543	15.3663	12.4212	11.2422	14.6761	10.9762	7.95343	7.6952	6.67174	22.2628	18.1386
COQ9	protein_coding	ENSG00000088682	30.9859	33.3517	48.2122	46.428	42.1011	42.2332	40.5342	43.1289	45.959	49.5476
TMEM40	protein_coding	ENSG00000088726	0.461101	0.528062	5.62969	5.44342	4.30129	4.95386	2.04782	2.62724	0.698193	0.770262
KIF9	protein_coding	ENSG00000088727	8.63595	8.90754	5.34959	5.11409	5.82933	7.17469	6.25674	6.41369	7.57741	7.1764
ARHGAP28	protein_coding	ENSG00000088756	1.84391	1.79311	7.98308	7.45141	3.89352	4.41866	3.26146	2.94949	6.55332	6.6666
CRLS1	protein_coding	ENSG00000088766	27.4003	25.0212	19.4947	19.5394	15.6882	18.1164	15.9743	12.1107	24.5275	19.4497
DEFB127	protein_coding	ENSG00000088782	0	0	0	0	0	0	0	0	0	0
PPP1R13B	protein_coding	ENSG00000088808	6.55417	9.11248	6.95883	12.3872	10.1023	8.79785	8.60589	8.47913	14.7027	13.6799
ATRN	protein_coding	ENSG00000088812	28.6602	26.4863	29.6891	33.5419	33.1006	31.097	40.7193	39.6125	37.7187	39.2262
SMOX	protein_coding	ENSG00000088826	41.231	36.6575	16.565	16.745	26.264	31.5381	22.7067	23.3231	25.3944	26.5734
SIGLEC1	protein_coding	ENSG00000088827	0.017311	0.019485	0.051314	0.008003	0.050906	0.01725	0.071311	0.056573	0.016579	0.047838
FKBP1A	protein_coding	ENSG00000088832	112.256	108.336	124.954	128.95	134.621	140.732	106.357	115.018	94.3568	99.6027
NSFL1C	protein_coding	ENSG00000088833	95.9878	94.0691	75.555	72.4188	71.8932	76.8105	80.9834	84.5884	105.441	105.946
SLC4A11	protein_coding	ENSG00000088836	8.063	8.17301	27.4644	20.7759	20.1463	17.7614	12.6061	15.3004	10.9492	12.2932
C20orf194	protein_coding	ENSG00000088854	4.70773	4.5102	5.89369	6.09222	6.05431	6.31257	5.91516	5.86336	6.77914	7.48564
ZNF343	protein_coding	ENSG00000088876	11.7652	10.7934	7.35662	7.75985	8.12689	7.45855	7.75901	7.92377	9.9606	8.96326
EBF4	protein_coding	ENSG00000088881	0.718794	0.739158	3.40269	2.57213	2.48992	2.35637	1.47728	1.4713	0.70466	0.819874
CPXM1	protein_coding	ENSG00000088882	0.009801	0	0.011574	0.033381	0.040818	0.029664	0	0.066556	0	0
MAVS	protein_coding	ENSG00000088888	7.33463	7.57227	24.6018	23.9978	17.7968	16.3833	18.304	18.2711	8.95482	16.6046
LZTS3	protein_coding	ENSG00000088899	8.84925	8.85413	31.1921	30.1863	15.6607	16.0173	4.40648	11.346	16.9736	18.7596
F11	protein_coding	ENSG00000088926	0	0	0	0	0	0	0	0	0	0
XRN2	protein_coding	ENSG00000088930	167.852	162.948	94.9795	101.124	95.7227	100.685	113.423	113.769	162.311	159.31
KIZ	protein_coding	ENSG00000088970	8.59479	6.90995	11.813	9.10508	6.83793	7.21169	6.07053	6.9628	10.5242	8.58235
DYNLL1	protein_coding	ENSG00000088986	367.756	340.981	337.718	333.539	343.289	364.177	319.446	350.993	514.764	504.296
TESC	protein_coding	ENSG00000088992	1.80564	1.95731	1.32449	0.932587	1.10762	1.08641	0.707068	0.830631	2.18976	2.24066
SNX5	protein_coding	ENSG00000089006	85.3281	87.0592	100.827	97.6606	91.2101	107.826	107.814	113.949	105.188	102.57
RPL6	protein_coding	ENSG00000089009	1651.56	1621.25	1197.06	1045.67	1302.5	1316.13	1138.85	1169.37	1808.58	1689.21
SIRPG	protein_coding	ENSG00000089012	0	0	0.015518	0.015552	0.043472	0.057327	0	0	0	0
MAPKAPK5	protein_coding	ENSG00000089022	14.829	14.299	13.4403	12.3206	14.4964	16.7536	16.8369	15.3189	16.5021	16.8705
P2RX7	protein_coding	ENSG00000089041	0.179397	0.150651	0.747621	1.13773	0.78966	0.553891	0.67328	0.417761	0.076806	0.303297
ESF1	protein_coding	ENSG00000089048	53.1178	49.0775	19.0808	21.5449	25.7446	29.7569	37	37.5164	67.8472	60.3549
RBBP9	protein_coding	ENSG00000089050	15.2316	13.6645	23.0406	26.5364	15.9924	17.9361	12.9937	16.0536	19.0094	17.7364
ANAPC5	protein_coding	ENSG00000089053	63.2118	60.6153	68.3548	65.2888	58.645	69.2358	55.5893	59.4515	56.6089	65.4317
SLC23A2	protein_coding	ENSG00000089057	9.27966	9.02113	16.1553	16.4909	15.6474	15.0788	10.6357	10.3156	16.4293	17.6769
SLC8B1	protein_coding	ENSG00000089060	14.1361	11.9822	19.3043	19.4599	19.2642	19.3705	18.9428	19.2967	12.924	11.2913
TMEM230	protein_coding	ENSG00000089063	86.659	89.2079	110.146	110.656	95.72	99.5857	78.8552	78.9516	104.837	98.2157
DZANK1	protein_coding	ENSG00000089091	1.47276	1.34696	1.87841	1.7275	2.11971	1.82973	2.46859	2.22985	2.25245	2.37036
KDM2B	protein_coding	ENSG00000089094	12.6999	10.7835	22.3227	18.7169	16.4186	19.3073	15.7404	14.401	23.5272	22.8519
CFAP61	protein_coding	ENSG00000089101	0.298983	0.121977	0.057472	0.203082	0.130444	0.113537	0.059229	0.192443	0.014159	0.146367
LHX5	protein_coding	ENSG00000089116	2.81642	2.73109	1.49574	1.62848	2.48558	2.43673	1.03841	1.0718	0.392397	0.63663
TASP1	protein_coding	ENSG00000089123	4.22297	4.67545	5.09909	4.59431	3.62174	4.11934	4.98843	5.45633	6.25729	6.72468
OAS1	protein_coding	ENSG00000089127	0.630414	0.538313	2.361	2.16809	1.99762	2.28673	1.74996	2.12234	0.32859	0.051266
GCN1	protein_coding	ENSG00000089154	55.4228	53.9386	51.5493	59.3148	59.8435	55.4416	64.896	68.6089	73.1805	79.9464
RPLP0	protein_coding	ENSG00000089157	1748.23	1625.85	1534.02	1592.27	1513.7	1686.63	1203.88	1406.66	1911.49	2119.92
PXN	protein_coding	ENSG00000089159	109.02	114.957	97.2348	94.4449	132.883	132.559	143.077	164.327	148.319	147.287
SIRT4	protein_coding	ENSG00000089163	0.957493	1.10818	2.32536	1.48486	0.941238	1.51406	2.2325	2.4443	0.753405	0.900881
RPH3A	protein_coding	ENSG00000089169	0.072181	0.020891	0.044927	0.010384	0.031103	0.023836	0.139934	0.151117	0.104862	0.411629
KIF16B	protein_coding	ENSG00000089177	6.87954	7.11865	10.9277	11.3614	9.09387	12.0452	8.75806	8.74446	11.4992	11.5523
TRMT6	protein_coding	ENSG00000089195	45.4252	41.4079	31.8086	40.6101	40.596	51.5356	39.7967	36.0779	49.9015	46.0938
CHGB	protein_coding	ENSG00000089199	5.14709	4.82233	4.56053	4.14592	6.2291	6.74751	7.49141	8.40808	2.59188	2.40526
PEBP1	protein_coding	ENSG00000089220	215.329	200.925	231.532	230.88	216.75	243.841	193.738	196.68	223.12	221.174
TBX5	protein_coding	ENSG00000089225	0.250944	0.130055	0.375382	0.55723	0.248513	0.123406	0.063967	0.154877	0.02366	0.01295
BRAP	protein_coding	ENSG00000089234	17.1042	16.2204	15.9976	16.301	16.278	17.2387	20.598	20.2551	19.6447	18.3802
ERP29	protein_coding	ENSG00000089248	264.853	251.588	389.053	354.122	357.367	368.798	309.981	340.168	249.466	242.011
NOS1	protein_coding	ENSG00000089250	1.80381	1.74592	1.67425	2.14343	2.27838	2.62543	1.94319	2.00099	1.81157	1.96077
FUS	protein_coding	ENSG00000089280	557.066	544.153	329.203	323.171	318.437	340.817	273.678	321.388	554.795	570.969
IGBP1	protein_coding	ENSG00000089289	61.1323	58.6168	36.7049	38.0511	42.9534	45.5326	38.8189	37.0194	59.7141	50.57
FXYD5	protein_coding	ENSG00000089327	199.288	202.607	255.617	231.772	256.102	251.244	261.548	260.186	183.09	175.621
ZNF302	protein_coding	ENSG00000089335	19.6367	23.691	30.5633	28.7846	23.9831	26.7585	27.0051	27.4796	29.7703	27.7701
GRAMD1A	protein_coding	ENSG00000089351	23.6509	26.5702	46.0377	43.0852	48.0144	48.2099	38.6205	39.4397	38.6743	48.9825
FXYD3	protein_coding	ENSG00000089356	0	0	0.053812	0	0.108892	0.071407	0	0	0	0
HEPH	protein_coding	ENSG00000089472	0.917148	1.16888	1.04988	1.07335	1.53322	1.1694	0.781623	1.35516	0.911271	0.770906
CDIP1	protein_coding	ENSG00000089486	32.7151	32.2106	52.8711	55.0248	45.2617	41.2344	35.9986	34.6606	37.2642	41.8076
CMTM1	protein_coding	ENSG00000089505	4.28468	4.52563	1.16227	2.81365	0.349605	15.17	1.44271	5.55853	0.794292	12.3102
KCNH4	protein_coding	ENSG00000089558	0.026186	0.046175	0.051521	0.036814	0.322093	0.301694	0.170219	0.202274	0.020669	0.03455
GANAB	protein_coding	ENSG00000089597	320.567	297.594	405.347	406.063	434.883	419.119	340.716	368.747	306.263	319.182
GMIP	protein_coding	ENSG00000089639	1.66638	1.4752	7.12032	6.66475	5.40855	4.89939	4.39659	5.20902	3.54469	3.40983
RBM41	protein_coding	ENSG00000089682	7.82541	8.11941	11.3639	9.6535	9.17669	9.25567	12.3454	11.395	9.74491	9.48525
BIRC5	protein_coding	ENSG00000089685	112.684	68.8874	65.0143	159.748	127.098	118.101	128.767	151.14	278.535	305.178
LAG3	protein_coding	ENSG00000089692	1.53611	1.81643	3.12074	1.82013	3.87972	3.0902	4.77781	5.27384	2.5142	2.85712
MLF2	protein_coding	ENSG00000089693	345.696	363.037	308.312	290.598	303.338	333.42	303.353	308.975	424.723	445.176
OTUB2	protein_coding	ENSG00000089723	8.07597	6.81632	3.72512	4.18845	5.32043	5.43486	4.57526	4.75358	7.31719	8.10487
DDX24	protein_coding	ENSG00000089737	39.4362	36.2121	23.7896	24.1143	26.0026	29.4684	28.8348	32.0704	31.633	29.5444
ZBTB25	protein_coding	ENSG00000089775	4.16356	4.56183	8.12197	7.61747	6.75272	6.48176	5.47337	5.17429	4.9351	4.33849
NECAP1	protein_coding	ENSG00000089818	16.3197	16.1788	15.5575	17.713	12.3445	13.4678	16.2075	13.4467	21.1549	34.0618
ARHGAP4	protein_coding	ENSG00000089820	0.558757	0.406579	1.43969	0.949086	0.979217	1.24941	2.09372	1.82605	0.695445	0.60812
ANKRD24	protein_coding	ENSG00000089847	0.558624	0.557381	1.59417	1.69723	1.51064	1.08255	0.894391	1.42505	1.65138	1.44873
DHX32	protein_coding	ENSG00000089876	4.91907	4.24271	21.6832	21.9564	20.5218	19.8519	13.7897	12.4626	20.6811	21.8612
RCOR1	protein_coding	ENSG00000089902	24.8265	24.952	15.9322	16.1882	24.3356	26.8508	25.7108	25.2063	30.7797	31.0178
GPATCH2L	protein_coding	ENSG00000089916	15.6268	12.7027	9.68975	8.6267	10.6612	12.7855	15.8775	16.1593	5.97357	6.41254
LTBP4	protein_coding	ENSG00000090006	52.3614	55.5634	148.789	116.593	125.49	105.565	128.574	134.15	76.7922	89.994
BLVRB	protein_coding	ENSG00000090013	71.1579	65.8603	116.564	111.189	92.9434	98.3941	63.3187	63.5747	65.4261	76.4253
SLC9A1	protein_coding	ENSG00000090020	21.1282	20.1034	23.845	17.1514	15.1751	19.9735	24.9194	25.1134	12.6328	18.2278
SPTLC1	protein_coding	ENSG00000090054	105.146	103.578	68.5056	71.179	77.2025	80.2536	96.5491	93.595	102.082	96.8808
PAPOLA	protein_coding	ENSG00000090060	136.772	117.548	67.1735	68.0948	60.3919	64.0752	63.4447	76.1295	113.221	137.505
CCNK	protein_coding	ENSG00000090061	57.1928	51.887	35.6847	34.2237	31.4673	31.1676	39.5302	43.0142	59.2065	52.3266
PCBP4	protein_coding	ENSG00000090097	58.534	53.3473	103.001	93.1465	96.3083	84.4611	72.2291	84.5031	68.6901	73.3117
RGS1	protein_coding	ENSG00000090104	0	0	0	0	0	0	0	0	0	0
YPEL3	protein_coding	ENSG00000090238	6.61749	5.33225	18.1288	16.237	11.4401	14.052	12.3982	8.61288	3.74984	4.16814
MRPS33	protein_coding	ENSG00000090263	17.7921	15.4443	17.0104	18.0625	15.8705	15.4882	11.882	12.9777	18.4506	15.5435
NDUFB2	protein_coding	ENSG00000090266	50.2034	46.5385	70.4811	64.5363	57.4041	57.9455	37.4467	39.0802	43.8847	50.2065
NUDC	protein_coding	ENSG00000090273	469.9	462.701	293.727	279.952	304.419	335.475	335.117	354.047	470.319	463.228
MAEA	protein_coding	ENSG00000090316	34.1032	37.7362	41.1747	34.9501	39.7305	33.238	43.3825	44.3036	57.9876	62.3334
ICAM1	protein_coding	ENSG00000090339	0.287745	0.461956	0.41433	0.204135	0.537064	0.483449	0.580567	0.457391	0.152964	0.165486
STRN4	protein_coding	ENSG00000090372	61.2827	42.1863	95.2221	92.9829	79.6858	91.2356	45.5369	73.2234	91.0621	98.364
IRAK3	protein_coding	ENSG00000090376	0.012955	0.005301	0.003102	0.010657	0.012341	0.015109	0.021267	0.009423	0.015199	0.023259
LYZ	protein_coding	ENSG00000090382	0.068743	0	0.052875	0.070126	0.046572	0	0.017745	0.189733	0	0.033149
SI	protein_coding	ENSG00000090402	0	0	0	0	0	0	0	0	0	0
MUL1	protein_coding	ENSG00000090432	24.1506	23.2502	23.8298	22.6401	32.1266	31.5829	30.4107	31.9821	24.4549	28.9406
TFAP4	protein_coding	ENSG00000090447	19.6444	19.7358	10.4886	10.5002	16.1598	18.4517	13.6846	14.1831	8.06842	7.35962
PDCD7	protein_coding	ENSG00000090470	47.6086	48.4277	46.9549	48.0377	45.1986	46.6671	39.852	42.7408	40.119	43.6878
SPG21	protein_coding	ENSG00000090487	88.4914	91.7467	88.2795	107.843	99.2004	102.917	67.3432	82.059	80.6115	102.642
FETUB	protein_coding	ENSG00000090512	0.142811	0.118791	0.440848	0.411325	0.089317	0.072418	0.086617	0.069742	0	0.030401
DNAJB11	protein_coding	ENSG00000090520	168.552	161.805	150.636	144.246	170.952	209.697	174.625	180.296	154.777	141.06
P3H2	protein_coding	ENSG00000090530	8.83303	8.93379	31.509	31.5542	40.1995	42.7152	28.5678	29.6927	9.81536	9.96831
THPO	protein_coding	ENSG00000090534	0.316191	0.324842	0.756936	0.66541	0.919708	1.16456	0.60015	0.334129	0.334754	0.385291
CHRD	protein_coding	ENSG00000090539	1.92401	1.96592	8.54617	8.35166	7.98585	7.1428	5.18066	4.99696	1.72377	2.36984
FLT3LG	protein_coding	ENSG00000090554	1.41169	1.47572	4.61223	5.53618	5.33612	4.02648	5.11559	5.40689	1.62555	1.43111
RAB11FIP3	protein_coding	ENSG00000090565	25.498	23.1339	30.853	30.0481	25.4188	26.5855	20.8644	22.6336	33.697	35.0819
GNPTG	protein_coding	ENSG00000090581	38.341	35.1401	47.1963	43.6208	44.8091	39.2552	39.4106	44.3012	28.3541	31.3193
ZNF268	protein_coding	ENSG00000090612	5.11939	8.06776	2.25572	1.91936	4.31694	5.34205	2.05363	4.99974	6.13826	2.50523
GOLGA3	protein_coding	ENSG00000090615	26.1573	26.1002	33.6616	35.7867	33.0958	30.8737	37.3473	39.6425	36.4561	35.2249
PABPC4	protein_coding	ENSG00000090621	161.756	160.898	111.936	106.234	115.357	118.87	141.577	136.986	162.242	162.892
CD209	protein_coding	ENSG00000090659	0.008234	0.006782	0.006275	0.018931	0.040777	0.028341	0.042801	0.030509	0	0
CERS4	protein_coding	ENSG00000090661	7.37662	7.00985	10.6829	11.0268	9.61699	8.56146	8.36245	8.38551	8.67974	9.05914
MCOLN1	protein_coding	ENSG00000090674	10.7643	12.2251	18.3522	16.0015	16.4963	15.2196	14.7429	13.8769	13.005	14.1503
USP48	protein_coding	ENSG00000090686	32.6389	31.4934	38.3691	43.7841	34.8956	33.5889	40.1875	41.6758	36.1228	33.1914
EFNB1	protein_coding	ENSG00000090776	52.984	51.9039	33.9466	34.462	29.6203	29.5081	24.0473	24.5787	14.118	15.2139
PDPR	protein_coding	ENSG00000090857	72.5192	57.7434	69.4286	85.5798	93.3504	67.2851	74.2545	81.5871	54.7876	53.4301
AARS	protein_coding	ENSG00000090861	89.0701	87.1411	127.504	139.606	94.8708	98.06	66.8118	68.8126	111.135	116.457
GLG1	protein_coding	ENSG00000090863	98.3096	96.6452	88.9026	92.7615	94.0039	85.7128	100.419	101.918	87.5741	88.5676
KIF4A	protein_coding	ENSG00000090889	50.808	47.2829	52.5606	59.5991	52.2986	54.3821	90.3641	90.1585	149.562	148.181
TNRC6A	protein_coding	ENSG00000090905	47.0878	46.2656	44.3291	43.3168	50.2705	52.7644	58.9113	60.2539	65.2794	66.8766
PLEKHG2	protein_coding	ENSG00000090924	13.4128	14.3947	17.3154	19.9565	17.3995	18.2531	16.3599	19.5058	11.5296	11.053
DLL3	protein_coding	ENSG00000090932	1.64528	1.2494	2.58165	2.18957	1.88928	2.00843	1.56939	1.6062	1.95408	2.44779
NAT14	protein_coding	ENSG00000090971	11.5237	12.3598	23.1575	22.3626	16.6071	18.9104	18.4374	15.6337	11.1104	14.5205
PITPNM2	protein_coding	ENSG00000090975	1.62062	1.66984	4.76716	4.71325	7.71653	6.84408	5.32388	5.56472	5.71884	6.0607
EXOC1	protein_coding	ENSG00000090989	31.683	28.8023	36.9282	37.4558	33.5828	36.8828	36.0305	37.6056	42.6127	40.9703
RBM27	protein_coding	ENSG00000091009	44.9381	43.0341	25.2411	28.2749	29.8654	31.533	34.5207	32.9324	48.6596	46.0556
POU4F3	protein_coding	ENSG00000091010	0.491955	0.350323	0.322248	0.178929	0.362676	0.502689	0.349947	0.282064	0.270909	0.167806
OSBPL8	protein_coding	ENSG00000091039	40.6272	39.0719	28.0504	31.6627	35.5439	39.1477	39.9193	38.4272	35.8067	35.2717
DTX2	protein_coding	ENSG00000091073	12.2136	12.1092	33.3761	35.7585	19.051	17.2181	29.77	27.5407	34.8347	38.0184
NLRC4	protein_coding	ENSG00000091106	0	0	0	0.019562	0.004321	0.006872	0	0.007658	0	0
PUS7	protein_coding	ENSG00000091127	31.0101	30.5159	23.1053	24.0399	23.9877	26.0258	26.3986	27.7841	38.0216	37.7435
LAMB4	protein_coding	ENSG00000091128	0.032818	0.002776	0.004588	0.013825	0.016134	0.016931	0.031327	0	0.005981	0.004245
NRCAM	protein_coding	ENSG00000091129	0.512908	0.348255	1.74857	1.79774	1.6136	1.60058	1.07113	1.00941	0.539975	0.553734
LAMB1	protein_coding	ENSG00000091136	84.4205	85.7205	91.3677	87.5334	165.214	158.899	244.476	262.754	76.064	72.2009
SLC26A4	protein_coding	ENSG00000091137	0.18161	0.127981	0.014604	0.005482	0.083484	0.131682	0.15831	0.11719	0.467035	0.406912
SLC26A3	protein_coding	ENSG00000091138	0	0	0	0	0	0	0	0	0	0
DLD	protein_coding	ENSG00000091140	65.8688	70.1805	55.202	62.2992	54.4379	49.3332	47.0694	53.5794	47.4871	42.4746
WDR7	protein_coding	ENSG00000091157	3.8264	3.64297	7.04957	7.09001	4.51455	5.53825	6.13267	7.72249	7.30069	7.74167
TXNL1	protein_coding	ENSG00000091164	64.0076	33.0199	56.7323	56.1635	29.222	33.4019	51.2799	34.87	118.902	82.7119
IL5RA	protein_coding	ENSG00000091181	0	0	0.019775	0	0.014423	0	0	0.023352	0	0
ABCC6	protein_coding	ENSG00000091262	0.240304	0.356077	2.73926	3.22486	0.833863	1.35561	0.919065	1.03328	0.256934	0.333729
CMTM6	protein_coding	ENSG00000091317	88.0522	82.5482	75.5035	77.4394	81.1583	86.8078	72.818	73.8026	61.9625	63.1306
ITGA6	protein_coding	ENSG00000091409	151.132	127.697	72.3387	84.7611	131.938	142.77	135.451	141.262	92.3807	79.0838
RAPGEF4	protein_coding	ENSG00000091428	0.174514	0.050201	0.68441	1.04883	0.534408	0.501548	0.63568	0.836185	0.730065	0.600754
MAP3K20	protein_coding	ENSG00000091436	56.6972	54.0655	76.4885	83.5248	71.947	78.9843	63.1494	65.3754	86.1979	85.1092
SMPX	protein_coding	ENSG00000091482	0.031498	0.076517	0.067266	0.249405	0.42661	0.162012	0.332726	0.246911	0.1411	0
FH	protein_coding	ENSG00000091483	113.492	108.8	103.708	113.663	108.034	116.608	93.3632	100.13	118.679	113.166
SEL1L3	protein_coding	ENSG00000091490	17.1863	21.1542	72.4752	60.8951	83.5263	83.7834	68.072	63.6903	29.3972	28.5409
TF	protein_coding	ENSG00000091513	0.001643	0.005736	0	0	0.023875	0.01754	0.027983	0.176292	0	0.018866
CDV3	protein_coding	ENSG00000091527	180.955	173.294	106.229	116.488	161.503	187.317	122.39	147.326	235.06	269.836
MYO15A	protein_coding	ENSG00000091536	0.021898	0.013611	0.026359	0.020693	0.033861	0.039612	0.063374	0.195864	0.006752	0.015507
ALKBH5	protein_coding	ENSG00000091542	68.8498	69.8754	53.9319	55.2355	47.6195	49.3409	48.8338	51.7101	69.2292	67.2292
APOH	protein_coding	ENSG00000091583	0	0	0.068791	0.043043	0.013218	0	0	0.046718	0.029593	0
NLRP1	protein_coding	ENSG00000091592	6.66906	6.2763	20.7782	20.0359	17.1827	16.8546	13.838	14.9852	7.86032	8.33212
PITPNM3	protein_coding	ENSG00000091622	5.42227	5.77679	6.92345	7.3735	10.4862	9.72485	6.06836	6.39811	6.52722	6.98336
SPAG7	protein_coding	ENSG00000091640	47.6434	48.2302	52.6247	49.724	52.5546	57.0856	47.4948	52.4266	68.4188	65.877
ORC6	protein_coding	ENSG00000091651	41.7944	37.8523	57.3882	61.7873	45.8253	65.3659	58.5727	64.5604	43.2046	46.0067
ZFHX4	protein_coding	ENSG00000091656	4.00582	4.13962	4.57001	6.69131	4.71022	5.45367	4.36774	6.11543	5.60132	4.86666
SLC17A6	protein_coding	ENSG00000091664	0	0	0	0	0.005213	0.006274	0	0.003243	0	0
CPA1	protein_coding	ENSG00000091704	0	0	0.085416	0.014795	0.084523	0.054427	0	0.093494	0	0
ZC3HC1	protein_coding	ENSG00000091732	14.2231	13.8972	12.4572	14.8482	13.2666	13.3542	12.3907	17.9434	17.4273	15.7508
ESR1	protein_coding	ENSG00000091831	0.117172	0.106407	0.070106	0.066373	0.127572	0.169249	0.29019	0.345854	0.038685	0.036826
RGS17	protein_coding	ENSG00000091844	3.34196	2.68076	3.17238	2.54078	3.18996	2.73015	1.57891	1.63601	1.86892	1.78958
ANGPT2	protein_coding	ENSG00000091879	0.056214	0.021958	0.004962	0.004957	0.035514	0.048976	0.126866	0.153167	0	0
TMEM101	protein_coding	ENSG00000091947	25.7978	23.4172	41.5391	40.5782	34.8112	31.2695	37.3061	42.6088	33.6247	32.8118
CD200	protein_coding	ENSG00000091972	2.78434	2.82612	7.15895	7.38894	6.7435	6.57627	1.97752	1.85063	1.03971	0.998102
CCDC80	protein_coding	ENSG00000091986	39.7876	32.4947	36.3365	42.8986	36.6533	41.7184	40.6373	45.77	49.1123	47.2799
CMA1	protein_coding	ENSG00000092009	0	0	0	0	0	0	0	0	0	0
PSME1	protein_coding	ENSG00000092010	66.0065	56.316	84.7587	83.461	74.7427	82.7096	65.5075	69.518	84.4927	79.9085
PPP2R3C	protein_coding	ENSG00000092020	18.5928	16.0694	12.2988	13.4947	12.5047	17.3082	16.9516	16.3971	19.865	21.6799
HAUS4	protein_coding	ENSG00000092036	14.7975	15.1924	27.1315	29.9097	21.8629	21.3213	19.6643	20.1424	20.689	19.6853
JPH4	protein_coding	ENSG00000092051	13.1226	13.6533	21.3319	22.4459	20.597	17.9736	17.134	18.5315	11.0832	13.8285
MYH7	protein_coding	ENSG00000092054	0	0.003957	0.01329	0	0.00509	0.000926	0.006668	0.004279	0	0
CEBPE	protein_coding	ENSG00000092067	0	0	0	0	0	0.014145	0.017413	0.033052	0	0.016318
SLC7A8	protein_coding	ENSG00000092068	2.77447	2.20057	1.76977	2.65871	1.92882	2.08296	2.25022	1.8055	1.42491	1.58114
OSGEP	protein_coding	ENSG00000092094	62.1503	60.2171	64.9437	61.2558	55.4691	60.0693	56.0751	61.4369	52.8666	49.4112
SLC22A17	protein_coding	ENSG00000092096	7.02191	7.32999	24.2192	22.0521	22.698	18.3438	15.5229	15.5291	7.1958	7.50427
RNF31	protein_coding	ENSG00000092098	11.2914	19.8235	31.3134	30.8408	25.8379	30.5542	28.4095	35.1653	21.931	31.5797
SCFD1	protein_coding	ENSG00000092108	66.8829	63.7959	51.1	51.9121	44.8348	46.0578	41.0763	43.8101	66.9259	54.9705
G2E3	protein_coding	ENSG00000092140	6.13044	8.44387	13.4561	13.054	11.0883	10.8816	32.2275	28.866	37.7562	38.3713
HECTD1	protein_coding	ENSG00000092148	57.553	40.9678	45.8469	53.0106	44.4877	46.1719	57.5471	57.6946	60.7218	59.0521
HNRNPC	protein_coding	ENSG00000092199	854.073	889.253	385.804	404.115	410.028	490.434	404.154	451.291	858.436	709.916
RPGRIP1	protein_coding	ENSG00000092200	0.024653	0.058512	0.328027	0.321852	0.378978	0.204671	0.197455	0.205454	0.020643	0.006436
SUPT16H	protein_coding	ENSG00000092201	155.746	145.595	124.794	134.354	123.18	134.967	118.376	123.451	165.325	161.727
TOX4	protein_coding	ENSG00000092203	29.3494	39.39	22.4034	21.6238	29.0431	23.3242	26.2102	23.9215	28.9248	27.4454
GEMIN2	protein_coding	ENSG00000092208	12.3848	10.564	14.9082	15.7676	13.9828	13.7729	15.5038	16.6819	20.4102	20.6859
TGM1	protein_coding	ENSG00000092295	5.46017	4.30939	10.7573	9.59669	9.09964	9.46326	6.65786	7.90157	7.6296	8.05434
TINF2	protein_coding	ENSG00000092330	9.91769	7.52001	15.3758	11.5891	8.68389	11.0357	11.9933	11.2099	12.2464	12.813
DAZL	protein_coding	ENSG00000092345	0	0	0	0	0	0	0	0	0.007433	0
TBL1Y	protein_coding	ENSG00000092377	0	0	0	0	0	0	0	0	0	0
SEMA6A	protein_coding	ENSG00000092421	1.16738	1.0515	8.00049	8.05487	4.01659	4.46061	3.11311	2.34672	0.602268	0.462232
TRPM7	protein_coding	ENSG00000092439	12.1687	12.0512	15.4643	15.8322	11.6999	12.0613	11.0459	11.1753	16.6613	13.9042
TYRO3	protein_coding	ENSG00000092445	9.2229	8.43878	13.462	10.8006	8.12073	8.29686	6.97732	7.40546	9.89709	10.6833
WDR76	protein_coding	ENSG00000092470	22.7181	22.7649	21.0913	20.6291	12.3995	12.3985	7.2776	7.35645	9.18428	10.2457
CAPN3	protein_coding	ENSG00000092529	0.073356	0.177532	0.508963	0.328561	0.245765	0.335293	0.295281	0.581964	0.216827	0.496999
SNAP23	protein_coding	ENSG00000092531	50.3767	42.5921	32.1427	38.8626	41.6017	37.4484	39.8877	33.8385	41.5042	41.1541
TBX15	protein_coding	ENSG00000092607	4.88927	5.151	7.75169	8.2609	8.10252	8.3426	5.31923	6.03341	4.72644	5.27563
PHGDH	protein_coding	ENSG00000092621	151.504	151.633	211.245	244.806	214.709	193.752	117.59	130.042	160.396	146.703
COL9A3	protein_coding	ENSG00000092758	0.073105	0.238221	0.679464	0.350037	0.849741	0.85893	0.851187	0.760665	0.044332	0.096005
EZR	protein_coding	ENSG00000092820	417.71	405.269	244.361	251.333	378.872	428.211	414.97	417.168	654.75	621.485
MYL6	protein_coding	ENSG00000092841	350.685	315.926	385.25	386.494	353.808	381.417	252.916	302.76	375.292	385.498
AGO1	protein_coding	ENSG00000092847	22.9653	22.8071	17.7424	19.3919	21.4441	21.6269	19.9084	21.04	19.8972	20.2056
TEKT2	protein_coding	ENSG00000092850	0.039232	0.087733	0.178812	0.132655	0.138941	0.119554	0.130579	0.027178	0.08468	0.062701
CLSPN	protein_coding	ENSG00000092853	54.7591	51.7068	64.8403	75.7081	62.5462	66.4842	47.9987	48.9779	27.5366	27.3951
RFFL	protein_coding	ENSG00000092871	9.31899	10.0848	14.24	13.3423	10.5484	11.5895	9.76179	10.7851	16.502	18.3422
UNC13D	protein_coding	ENSG00000092929	20.0473	24.3352	46.8621	42.7012	42.4051	39.4471	55.9358	66.1625	34.4574	39.0402
MFSD11	protein_coding	ENSG00000092931	8.0293	7.68419	13.1915	14.5558	18.319	15.765	13.3529	15.5255	4.98603	5.42347
DPYSL2	protein_coding	ENSG00000092964	20.0505	14.4526	34.3324	57.3856	49.5985	46.9795	33.9136	27.612	10.1761	14.3054
TGFB2	protein_coding	ENSG00000092969	37.489	39.0007	117.618	114.619	83.0953	88.8376	93.948	85.5929	51.8364	52.7097
GPATCH2	protein_coding	ENSG00000092978	19.3775	18.3508	11.5112	11.8078	12.0911	13.6669	13.2739	12.4193	13.3804	13.1508
NUP50	protein_coding	ENSG00000093000	49.7543	81.1474	61.0275	57.6592	68.8171	71.4936	85.4327	87.6074	116.275	112.629
CDC45	protein_coding	ENSG00000093009	49.9268	48.3546	116.087	110.376	98.9471	107.862	66.2041	65.3179	57.3595	57.4105
COMT	protein_coding	ENSG00000093010	50.3247	49.06	54.263	49.1214	44.5495	52.8201	40.187	45.0258	49.4408	78.1826
ADA2	protein_coding	ENSG00000093072	0	0	0.023176	0.019599	0.090748	0.099636	0.061556	0.121725	0.005614	0
AC016026.1	processed_transcript	ENSG00000093100	0.72662	0.709107	2.62377	1.6321	2.32813	1.74762	1.8544	2.61835	0.346272	0.242038
VNN3	protein_coding	ENSG00000093134	0	0	0	0	0.013789	0	0	0	0.013234	0
ECHDC1	protein_coding	ENSG00000093144	43.515	46.511	29.0443	32.8321	23.9766	30.767	33.7493	36.874	45.4835	39.0738
LRRFIP2	protein_coding	ENSG00000093167	69.1171	65.1905	74.1214	77.1603	63.9949	66.8955	78.5394	84.201	95.8853	84.9904
[truncated: 56,736 more rows]

## Sheet: list_of_24087_genes
gene_names	bio_type	ensemble_id
TSPAN6	protein_coding	ENSG00000000003
DPM1	protein_coding	ENSG00000000419
SCYL3	protein_coding	ENSG00000000457
C1orf112	protein_coding	ENSG00000000460
CFH	protein_coding	ENSG00000000971
FUCA2	protein_coding	ENSG00000001036
GCLC	protein_coding	ENSG00000001084
NFYA	protein_coding	ENSG00000001167
STPG1	protein_coding	ENSG00000001460
NIPAL3	protein_coding	ENSG00000001461
LAS1L	protein_coding	ENSG00000001497
ENPP4	protein_coding	ENSG00000001561
SEMA3F	protein_coding	ENSG00000001617
ANKIB1	protein_coding	ENSG00000001629
CYP51A1	protein_coding	ENSG00000001630
KRIT1	protein_coding	ENSG00000001631
RAD52	protein_coding	ENSG00000002016
MYH16	transcribed_unitary_pseudogene	ENSG00000002079
BAD	protein_coding	ENSG00000002330
LAP3	protein_coding	ENSG00000002549
CD99	protein_coding	ENSG00000002586
AOC1	protein_coding	ENSG00000002726
HECW1	protein_coding	ENSG00000002746
MAD1L1	protein_coding	ENSG00000002822
LASP1	protein_coding	ENSG00000002834
SNX11	protein_coding	ENSG00000002919
TMEM176A	protein_coding	ENSG00000002933
M6PR	protein_coding	ENSG00000003056
KLHL13	protein_coding	ENSG00000003096
CYP26B1	protein_coding	ENSG00000003137
ICA1	protein_coding	ENSG00000003147
DBNDD1	protein_coding	ENSG00000003249
ALS2	protein_coding	ENSG00000003393
CASP10	protein_coding	ENSG00000003400
CFLAR	protein_coding	ENSG00000003402
TFPI	protein_coding	ENSG00000003436
NDUFAF7	protein_coding	ENSG00000003509
RBM5	protein_coding	ENSG00000003756
MTMR7	protein_coding	ENSG00000003987
SLC7A2	protein_coding	ENSG00000003989
ARF5	protein_coding	ENSG00000004059
SARM1	protein_coding	ENSG00000004139
POLDIP2	protein_coding	ENSG00000004142
PLXND1	protein_coding	ENSG00000004399
AK2	protein_coding	ENSG00000004455
FKBP4	protein_coding	ENSG00000004478
KDM1A	protein_coding	ENSG00000004487
RBM6	protein_coding	ENSG00000004534
CAMKK1	protein_coding	ENSG00000004660
RECQL	protein_coding	ENSG00000004700
VPS50	protein_coding	ENSG00000004766
HSPB6	protein_coding	ENSG00000004776
ARHGAP33	protein_coding	ENSG00000004777
NDUFAB1	protein_coding	ENSG00000004779
PDK4	protein_coding	ENSG00000004799
SLC22A16	protein_coding	ENSG00000004809
ZMYND10	protein_coding	ENSG00000004838
ABCB5	protein_coding	ENSG00000004846
ARX	protein_coding	ENSG00000004848
SLC25A13	protein_coding	ENSG00000004864
ST7	protein_coding	ENSG00000004866
CDC27	protein_coding	ENSG00000004897
CALCR	protein_coding	ENSG00000004948
HCCS	protein_coding	ENSG00000004961
DVL2	protein_coding	ENSG00000004975
PRSS22	protein_coding	ENSG00000005001
UPF1	protein_coding	ENSG00000005007
SKAP2	protein_coding	ENSG00000005020
SLC25A5	protein_coding	ENSG00000005022
MCUB	protein_coding	ENSG00000005059
HOXA11	protein_coding	ENSG00000005073
POLR2J	protein_coding	ENSG00000005075
DHX33	protein_coding	ENSG00000005100
MEOX1	protein_coding	ENSG00000005102
THSD7A	protein_coding	ENSG00000005108
LIG3	protein_coding	ENSG00000005156
RPAP3	protein_coding	ENSG00000005175
ACSM3	protein_coding	ENSG00000005187
REXO5	protein_coding	ENSG00000005189
CIAPIN1	protein_coding	ENSG00000005194
SPPL2B	protein_coding	ENSG00000005206
FAM214B	protein_coding	ENSG00000005238
COPZ2	protein_coding	ENSG00000005243
PRKAR2B	protein_coding	ENSG00000005249
MSL3	protein_coding	ENSG00000005302
CREBBP	protein_coding	ENSG00000005339
TSPOAP1	protein_coding	ENSG00000005379
MPO	protein_coding	ENSG00000005381
GCFC2	protein_coding	ENSG00000005436
WDR54	protein_coding	ENSG00000005448
CROT	protein_coding	ENSG00000005469
[truncated: 23,996 more rows]

## Sheet: biotype_of_24087_genes
* in the 'potential_lncRNA' columns refer to the types that are included
[truncated: 49 more rows]
