# Supplementary material for: The S-phase-induced lncRNA SUNO1 promotes cell proliferation by controlling YAP1/Hippo signaling pathway
Source: eLife. 2020 Oct 27;9:e55102. doi: 10.7554/eLife.55102 (PMC7591261; doi:10.7554/eLife.55102)
Supplement: Supplementary file 2. — Five sheets represent the full results (of 24087 genes) of differential expression tests (exactTest from edgeR) between G1 vs. G1S, G1S vs. S, S vs. G2, G2 vs. M, M vs. G1, respectively. [file elife-55102-supp2.xlsx]

## Sheet: G1_vs_G1S
gene_names	bio_type	ensemble_id	logFC	logCPM	PValue	FDR
TSPAN6	protein_coding	ENSG00000000003	-0.140696	5.2183	0.0392499	0.0576119
DPM1	protein_coding	ENSG00000000419	-1.29449	6.761	1.33004e-44	1.74112e-43
SCYL3	protein_coding	ENSG00000000457	-0.366808	2.54455	0.000547094	0.00104123
C1orf112	protein_coding	ENSG00000000460	1.29249	4.61937	5.07271e-61	1.089e-59
CFH	protein_coding	ENSG00000000971	0.920815	0.477974	3.41602e-07	8.64847e-07
FUCA2	protein_coding	ENSG00000001036	0.046755	6.77687	0.459416	0.527603
GCLC	protein_coding	ENSG00000001084	-0.120579	5.70717	0.0753175	0.104744
NFYA	protein_coding	ENSG00000001167	-0.570766	6.75872	2.71231e-17	1.23781e-16
STPG1	protein_coding	ENSG00000001460	0.150424	3.31765	0.102929	0.13894
NIPAL3	protein_coding	ENSG00000001461	0.30144	4.65734	1.99627e-05	4.38323e-05
LAS1L	protein_coding	ENSG00000001497	-0.534445	6.81317	7.93682e-15	3.1985e-14
ENPP4	protein_coding	ENSG00000001561	0.974079	4.3141	1.29718e-37	1.32732e-36
SEMA3F	protein_coding	ENSG00000001617	0.185543	5.55522	0.00727107	0.0119548
ANKIB1	protein_coding	ENSG00000001629	-0.748616	6.66289	7.75452e-29	5.72252e-28
CYP51A1	protein_coding	ENSG00000001630	0.244666	2.93936	0.047601	0.0687306
KRIT1	protein_coding	ENSG00000001631	0.151816	2.6312	0.170648	0.219514
RAD52	protein_coding	ENSG00000002016	0.580511	3.7071	8.08766e-10	2.44979e-09
MYH16	transcribed_unitary_pseudogene	ENSG00000002079	-0.38625	3.17598	0.000126376	0.000256858
BAD	protein_coding	ENSG00000002330	0.519468	4.97248	4.26243e-12	1.47344e-11
LAP3	protein_coding	ENSG00000002549	-0.791315	6.18588	5.68822e-30	4.3718e-29
CD99	protein_coding	ENSG00000002586	0.0610749	5.87907	0.352862	0.418957
AOC1	protein_coding	ENSG00000002726	1.94749	-4.06735	0.0859089	0.117808
HECW1	protein_coding	ENSG00000002746	0.967412	1.58204	5.90019e-13	2.14033e-12
MAD1L1	protein_coding	ENSG00000002822	-0.565776	6.56147	1.14716e-18	5.58442e-18
LASP1	protein_coding	ENSG00000002834	-0.782068	9.40078	2.0018e-32	1.69124e-31
SNX11	protein_coding	ENSG00000002919	-0.153387	3.98236	0.0599616	0.0850236
TMEM176A	protein_coding	ENSG00000002933	0.793882	-0.433026	0.00268054	0.00468346
M6PR	protein_coding	ENSG00000003056	-0.640224	8.0521	6.10049e-22	3.40145e-21
KLHL13	protein_coding	ENSG00000003096	0.945153	2.30993	8.35961e-18	3.91214e-17
CYP26B1	protein_coding	ENSG00000003137	0.675003	5.0286	9.42573e-23	5.42762e-22
ICA1	protein_coding	ENSG00000003147	1.56846	0.247671	1.66509e-14	6.59438e-14
DBNDD1	protein_coding	ENSG00000003249	0.478321	3.42513	3.78308e-07	9.54168e-07
ALS2	protein_coding	ENSG00000003393	-0.271339	5.95281	5.4078e-05	0.000113732
CASP10	protein_coding	ENSG00000003400	2.86224	0.358882	3.66344e-41	4.25875e-40
CFLAR	protein_coding	ENSG00000003402	0.553286	5.1603	3.63266e-15	1.4886e-14
TFPI	protein_coding	ENSG00000003436	-0.613197	5.40839	2.03601e-19	1.02468e-18
NDUFAF7	protein_coding	ENSG00000003509	-0.000733751	5.10878	0.994025	1
RBM5	protein_coding	ENSG00000003756	0.542942	6.15735	8.9264e-17	3.97137e-16
MTMR7	protein_coding	ENSG00000003987	0.119489	-1.79255	1	1
SLC7A2	protein_coding	ENSG00000003989	0.659601	5.86518	2.705e-23	1.58993e-22
ARF5	protein_coding	ENSG00000004059	-0.152472	5.31567	0.0266145	0.0402045
SARM1	protein_coding	ENSG00000004139	-2.07665	1.28884	1.81666e-42	2.21783e-41
POLDIP2	protein_coding	ENSG00000004142	-0.595357	7.00228	1.77964e-20	9.33292e-20
PLXND1	protein_coding	ENSG00000004399	0.717902	6.87516	2.81246e-23	1.65229e-22
AK2	protein_coding	ENSG00000004455	-0.656134	7.68593	5.33285e-24	3.23884e-23
FKBP4	protein_coding	ENSG00000004478	-1.03203	8.87506	9.26066e-58	1.78735e-56
KDM1A	protein_coding	ENSG00000004487	-0.599779	7.32299	9.48116e-21	5.02581e-20
RBM6	protein_coding	ENSG00000004534	-0.489058	7.0764	5.71112e-14	2.18911e-13
CAMKK1	protein_coding	ENSG00000004660	-0.010568	4.50503	0.895934	0.929507
RECQL	protein_coding	ENSG00000004700	-0.0716356	7.18237	0.297198	0.360507
VPS50	protein_coding	ENSG00000004766	0.354444	3.93915	2.14731e-05	4.70074e-05
HSPB6	protein_coding	ENSG00000004776	0.119454	-1.09869	0.729257	0.785028
ARHGAP33	protein_coding	ENSG00000004777	2.44693	3.60313	1.63685e-111	1.24768e-109
NDUFAB1	protein_coding	ENSG00000004779	-0.731866	5.31689	3.18041e-24	1.95027e-23
PDK4	protein_coding	ENSG00000004799	-1.25407	-0.338028	2.54354e-07	6.49901e-07
SLC22A16	protein_coding	ENSG00000004809	-1.60587	-3.76027	0.16814	0.2166
ZMYND10	protein_coding	ENSG00000004838	0.408178	0.476613	0.0323086	0.0480796
ABCB5	protein_coding	ENSG00000004846	2.50982	-1.98398	2.47028e-09	7.2625e-09
ARX	protein_coding	ENSG00000004848	1.61373	-3.62166	0.0430081	0.0626587
SLC25A13	protein_coding	ENSG00000004864	-0.49452	5.77292	2.61828e-13	9.68914e-13
ST7	protein_coding	ENSG00000004866	-0.378807	4.25641	1.53432e-06	3.6961e-06
CDC27	protein_coding	ENSG00000004897	-0.411638	7.44439	2.29538e-09	6.7673e-09
CALCR	protein_coding	ENSG00000004948	-1.64221	-2.20808	0.000370413	0.000718244
HCCS	protein_coding	ENSG00000004961	-0.719095	4.52653	7.09747e-23	4.10263e-22
DVL2	protein_coding	ENSG00000004975	0.533724	4.72456	5.52818e-14	2.12169e-13
PRSS22	protein_coding	ENSG00000005001	-0.653569	-3.42912	0.766113	0.817963
UPF1	protein_coding	ENSG00000005007	-0.246059	6.82704	0.000132567	0.000268895
SKAP2	protein_coding	ENSG00000005020	0.988599	-2.89732	0.100588	0.13604
SLC25A5	protein_coding	ENSG00000005022	-0.433895	8.01535	7.70104e-12	2.62531e-11
MCUB	protein_coding	ENSG00000005059	0.551539	3.78253	3.81578e-11	1.25168e-10
HOXA11	protein_coding	ENSG00000005073	-0.759222	3.85176	3.4293e-21	1.85288e-20
POLR2J	protein_coding	ENSG00000005075	-0.427143	5.75969	2.62693e-10	8.20367e-10
DHX33	protein_coding	ENSG00000005100	-0.715212	6.30048	9.41779e-27	6.38644e-26
MEOX1	protein_coding	ENSG00000005102	0.477389	-0.870242	0.31691	0.381099
THSD7A	protein_coding	ENSG00000005108	3.09405	-2.42918	2.54099e-08	6.95668e-08
LIG3	protein_coding	ENSG00000005156	-0.398316	5.69144	9.69222e-09	2.73112e-08
RPAP3	protein_coding	ENSG00000005175	-0.732571	6.43705	1.6235e-25	1.04756e-24
ACSM3	protein_coding	ENSG00000005187	1.32927	0.490349	2.46249e-12	8.61663e-12
REXO5	protein_coding	ENSG00000005189	0.946457	3.13622	1.40145e-23	8.34532e-23
CIAPIN1	protein_coding	ENSG00000005194	0.0495773	5.18094	0.487553	0.555757
SPPL2B	protein_coding	ENSG00000005206	1.46503	3.9836	3.45849e-14	1.34211e-13
FAM214B	protein_coding	ENSG00000005238	0.406363	5.3741	1.04361e-09	3.13903e-09
COPZ2	protein_coding	ENSG00000005243	1.09792	2.92543	5.05607e-28	3.60846e-27
PRKAR2B	protein_coding	ENSG00000005249	-0.570885	4.99366	7.14275e-16	3.03863e-15
MSL3	protein_coding	ENSG00000005302	-0.665086	5.25838	1.87853e-21	1.02604e-20
CREBBP	protein_coding	ENSG00000005339	-1.1279	7.54064	1.01745e-57	1.95746e-56
TSPOAP1	protein_coding	ENSG00000005379	2.50696	0.25538	4.50965e-21	2.42626e-20
MPO	protein_coding	ENSG00000005381	-1.75502	-1.43448	0.10142	0.13708
GCFC2	protein_coding	ENSG00000005436	-0.273804	4.42677	0.000639144	0.00120717
WDR54	protein_coding	ENSG00000005448	0.168892	4.71108	0.0230156	0.0351382
CROT	protein_coding	ENSG00000005469	1.29523	2.59327	6.56152e-34	5.87974e-33
ABCB4	protein_coding	ENSG00000005471	0.832441	2.25998	3.89019e-13	1.42601e-12
KMT2E	protein_coding	ENSG00000005483	-0.852918	5.87571	1.42799e-34	1.31584e-33
RHBDD2	protein_coding	ENSG00000005486	0.1922	5.7744	0.00814646	0.0133087
SOX8	protein_coding	ENSG00000005513	0.165088	2.09253	0.25911	0.319079
IBTK	protein_coding	ENSG00000005700	0.0338102	5.63251	0.627074	0.690106
ZNF195	protein_coding	ENSG00000005801	-0.32161	5.08469	4.1096e-06	9.56498e-06
MYCBP2	protein_coding	ENSG00000005810	0.0753117	6.18051	0.351323	0.417336
FBXL3	protein_coding	ENSG00000005812	-0.458824	5.19622	5.53207e-11	1.79972e-10
PDK2	protein_coding	ENSG00000005882	0.33516	4.677	6.01623e-06	1.38131e-05
ITGA3	protein_coding	ENSG00000005884	-0.924278	9.70144	1.25019e-45	1.70132e-44
ZFX	protein_coding	ENSG00000005889	-0.846678	4.53295	1.85687e-28	1.34718e-27
LAMP2	protein_coding	ENSG00000005893	-0.126026	7.39214	0.0458932	0.0665239
ITGA2B	protein_coding	ENSG00000005961	2.53355	-1.10513	1.52755e-13	5.72491e-13
ASB4	protein_coding	ENSG00000005981	0.278744	-2.62949	0.745266	0.799253
GDE1	protein_coding	ENSG00000006007	0.0935299	6.15075	0.1491	0.194254
REX1BD	protein_coding	ENSG00000006015	0.680301	4.14546	1.24528e-16	5.49962e-16
CRLF1	protein_coding	ENSG00000006016	1.20406	2.58653	5.16618e-19	2.55257e-18
OSBPL7	protein_coding	ENSG00000006025	1.18835	3.68297	1.95458e-31	1.58518e-30
TMEM98	protein_coding	ENSG00000006042	0.808079	6.03336	7.64865e-34	6.82598e-33
YBX2	protein_coding	ENSG00000006047	0.357853	2.91733	0.000801765	0.00149533
KRT33A	protein_coding	ENSG00000006059	-0.564694	-2.6558	0.78457	0.834302
MAP3K14	protein_coding	ENSG00000006062	-0.291256	5.06633	0.000206442	0.000411023
ABCC8	protein_coding	ENSG00000006071	2.30461	0.837843	7.23772e-40	8.02278e-39
TMEM132A	protein_coding	ENSG00000006118	0.632699	6.40153	9.11241e-19	4.45576e-18
AP2B1	protein_coding	ENSG00000006125	-0.450728	8.18075	1.2535e-11	4.22693e-11
TAC1	protein_coding	ENSG00000006128	-1.32491	-3.48987	0.0813489	0.112199
ZNF263	protein_coding	ENSG00000006194	-1.21306	5.78633	1.10931e-72	3.29875e-71
CX3CL1	protein_coding	ENSG00000006210	-1.02696	3.53064	5.72228e-31	4.54893e-30
SPATA20	protein_coding	ENSG00000006282	0.710536	6.25095	1.7142e-27	1.19994e-26
CACNA1G	protein_coding	ENSG00000006283	0.537755	3.21936	0.00307981	0.00533846
TNFRSF12A	protein_coding	ENSG00000006327	-0.269684	7.59992	0.000103762	0.000212654
MAP3K9	protein_coding	ENSG00000006432	-0.520335	6.03949	7.38721e-15	2.9805e-14
RALA	protein_coding	ENSG00000006451	-0.742164	6.43652	3.67162e-26	2.43029e-25
BAIAP2L1	protein_coding	ENSG00000006453	0.067932	5.55052	0.329586	0.394726
KDM7A	protein_coding	ENSG00000006459	-0.267745	4.08819	0.0136679	0.0216022
ETV1	protein_coding	ENSG00000006468	-0.99935	1.65894	5.64034e-16	2.40799e-15
AGK	protein_coding	ENSG00000006530	0.0237407	4.83895	0.750348	0.803809
ALDH3B1	protein_coding	ENSG00000006534	1.07326	4.72913	7.83084e-46	1.07599e-44
PHTF2	protein_coding	ENSG00000006576	0.18714	6.73262	0.0047973	0.00810326
CCL26	protein_coding	ENSG00000006606	1.08976	2.10463	1.25335e-18	6.09393e-18
FARP2	protein_coding	ENSG00000006607	-0.456351	5.90204	1.70369e-11	5.69954e-11
USH1C	protein_coding	ENSG00000006611	0.846254	-0.215744	9.68403e-05	0.000199044
GGCT	protein_coding	ENSG00000006625	0.0619422	4.03598	0.553257	0.619914
DBF4	protein_coding	ENSG00000006634	-0.244067	6.4827	0.00190393	0.00338576
TBXA2R	protein_coding	ENSG00000006638	0.904167	0.245965	5.15782e-06	1.19126e-05
IFRD1	protein_coding	ENSG00000006652	-0.946725	5.47057	1.61173e-41	1.89837e-40
COX10	protein_coding	ENSG00000006695	-0.986314	3.91915	4.19518e-32	3.49651e-31
GTF2IRD1	protein_coding	ENSG00000006704	0.0390745	5.26476	0.573875	0.639138
PAF1	protein_coding	ENSG00000006712	-0.31449	7.06347	3.76709e-06	8.79073e-06
VPS41	protein_coding	ENSG00000006715	-0.0503669	6.01133	0.452355	0.520587
ARHGAP44	protein_coding	ENSG00000006740	1.43817	2.67151	6.79148e-42	8.09433e-41
ELAC2	protein_coding	ENSG00000006744	-0.479638	6.31711	2.50476e-13	9.28187e-13
SCIN	protein_coding	ENSG00000006747	0.204944	-0.260651	0.342042	0.407497
ARSD	protein_coding	ENSG00000006756	0.447992	-3.08388	0.491331	0.55956
PNPLA4	protein_coding	ENSG00000006757	-0.423184	2.58947	9.30207e-05	0.000191569
ADIPOR2	protein_coding	ENSG00000006831	-0.44543	7.75287	3.2147e-11	1.06014e-10
CDKL3	protein_coding	ENSG00000006837	-0.757292	0.518837	2.43685e-05	5.30805e-05
UPP2	protein_coding	ENSG00000007001	0.238561	-2.98036	0.698003	0.756243
MARK4	protein_coding	ENSG00000007047	-0.500745	5.07643	4.26444e-13	1.5613e-12
PROM1	protein_coding	ENSG00000007062	1.94359	-3.58857	0.0804803	0.111161
CCDC124	protein_coding	ENSG00000007080	-0.628425	6.30495	2.12016e-19	1.06614e-18
CEACAM21	protein_coding	ENSG00000007129	1.59774	-3.38272	0.025778	0.0390242
PAFAH1B1	protein_coding	ENSG00000007168	-0.332844	6.08714	3.22111e-07	8.17305e-07
NOS2	protein_coding	ENSG00000007171	1.57428	1.41939	1.11926e-30	8.8103e-30
DNAH9	protein_coding	ENSG00000007174	-0.94707	-3.58376	0.160679	0.20799
KIAA0100	protein_coding	ENSG00000007202	-0.127834	8.64592	0.0547635	0.0782934
SLC13A2	protein_coding	ENSG00000007216	-5.09465	-2.53722	0.00916194	0.0148449
GAS7	protein_coding	ENSG00000007237	0.936239	2.8222	1.55997e-19	7.89059e-19
TRAPPC6A	protein_coding	ENSG00000007255	0.874568	1.45561	5.21195e-10	1.59578e-09
MATK	protein_coding	ENSG00000007264	0.872638	-0.00383931	0.000178944	0.000358439
SCN4A	protein_coding	ENSG00000007314	-0.423759	0.52873	0.0526486	0.075458
ST7L	protein_coding	ENSG00000007341	-0.0673406	4.59966	0.395053	0.462441
TKTL1	protein_coding	ENSG00000007350	-1.63892	-3.61861	0.060773	0.086098
RPUSD1	protein_coding	ENSG00000007376	-0.034327	5.19031	0.65545	0.716749
RHBDF1	protein_coding	ENSG00000007384	2.14964	5.02066	7.07145e-171	1.54845e-168
LUC7L	protein_coding	ENSG00000007392	-0.408107	5.65094	2.95978e-09	8.65406e-09
CACNA2D2	protein_coding	ENSG00000007402	0.81377	1.58936	7.41403e-09	2.10617e-08
BAIAP3	protein_coding	ENSG00000007516	2.55254	2.13494	1.34977e-73	4.0793e-72
TSR3	protein_coding	ENSG00000007520	-0.602688	5.94947	1.9265e-19	9.70991e-19
PIGQ	protein_coding	ENSG00000007541	0.85384	4.02233	8.50405e-22	4.71431e-21
CRAMP1	protein_coding	ENSG00000007545	-0.555201	4.61885	1.53921e-13	5.76594e-13
TEAD3	protein_coding	ENSG00000007866	1.02961	5.58917	4.88786e-52	7.90691e-51
DNAJC11	protein_coding	ENSG00000007923	-0.309439	5.88686	2.50233e-06	5.92661e-06
MYLIP	protein_coding	ENSG00000007944	-1.21325	3.52973	1.50951e-42	1.84942e-41
E2F2	protein_coding	ENSG00000007968	0.852982	3.79886	6.50475e-24	3.93076e-23
PSMB1	protein_coding	ENSG00000008018	-0.759243	7.23636	1.2589e-28	9.20278e-28
SYN1	protein_coding	ENSG00000008056	-0.972066	2.22943	4.31716e-14	1.66566e-13
JARID2	protein_coding	ENSG00000008083	-1.75625	5.74578	3.77017e-137	4.7298e-135
CDKL5	protein_coding	ENSG00000008086	-0.0716055	3.4944	0.438167	0.50685
CAMK1G	protein_coding	ENSG00000008118	2.51713	-3.00617	9.10739e-05	0.000187704
CDK11A	protein_coding	ENSG00000008128	0.123139	-1.23689	0.712783	0.769936
NADK	protein_coding	ENSG00000008130	0.36183	4.87398	1.07883e-06	2.63227e-06
DLEC1	protein_coding	ENSG00000008226	3.20137	-3.42773	0.00521861	0.00877123
CYTH3	protein_coding	ENSG00000008256	0.164265	7.81501	0.0109407	0.0175476
ADAM22	protein_coding	ENSG00000008277	1.06731	2.90196	2.24305e-24	1.38393e-23
SYPL1	protein_coding	ENSG00000008282	-0.73506	6.72751	1.09902e-28	8.05599e-28
CYB561	protein_coding	ENSG00000008283	0.128212	5.82257	0.0521645	0.0748354
SPAG9	protein_coding	ENSG00000008294	-1.63256	7.30539	6.33899e-131	7.06886e-129
CELSR3	protein_coding	ENSG00000008300	1.17493	5.49078	1.84556e-57	3.51971e-56
AASS	protein_coding	ENSG00000008311	0.530937	4.04107	3.5537e-11	1.16746e-10
SS18L2	protein_coding	ENSG00000008324	-0.717142	3.70079	2.76273e-16	1.19773e-15
MPND	protein_coding	ENSG00000008382	-0.109134	2.21171	0.367354	0.434234
MGST1	protein_coding	ENSG00000008394	0.311391	4.0271	0.000130937	0.000265725
CRY1	protein_coding	ENSG00000008405	-0.448716	5.76516	9.60634e-12	3.25669e-11
NFIX	protein_coding	ENSG00000008441	0.406794	5.92758	8.43451e-10	2.55229e-09
ST3GAL1	protein_coding	ENSG00000008513	-0.362668	7.54044	1.05818e-07	2.78016e-07
MMP25	protein_coding	ENSG00000008516	-1.09013	0.325827	1.14243e-06	2.78209e-06
IL32	protein_coding	ENSG00000008517	-0.484263	3.96747	1.05652e-08	2.96913e-08
PKD1	protein_coding	ENSG00000008710	1.08717	6.34893	1.00302e-51	1.60957e-50
MAPK8IP2	protein_coding	ENSG00000008735	-0.170795	-1.06613	0.65354	0.714984
MED24	protein_coding	ENSG00000008838	0.169801	5.60908	0.012306	0.0195951
RHOBTB2	protein_coding	ENSG00000008853	0.16974	5.39111	0.0151472	0.0237811
HEATR5B	protein_coding	ENSG00000008869	0.228584	5.11706	0.000767213	0.00143422
SEC62	protein_coding	ENSG00000008952	-1.07383	7.19744	3.07837e-61	6.6382e-60
RPS20	protein_coding	ENSG00000008988	-0.465455	9.09923	7.3638e-11	2.38019e-10
CSDE1	protein_coding	ENSG00000009307	-1.09003	10.0499	7.21411e-57	1.34912e-55
UBE3C	protein_coding	ENSG00000009335	-0.408033	5.76686	3.50563e-09	1.02092e-08
REV3L	protein_coding	ENSG00000009413	0.0692094	5.25113	0.371617	0.438524
TENM1	protein_coding	ENSG00000009694	1.42844	-0.531615	5.40511e-07	1.34622e-06
PAX7	protein_coding	ENSG00000009709	0.598986	2.81771	3.37014e-09	9.8241e-09
MASP2	protein_coding	ENSG00000009724	-1.83679	-2.89608	0.000620511	0.00117336
IYD	protein_coding	ENSG00000009765	3.41823	-3.34163	0.00171544	0.00306959
FAM76A	protein_coding	ENSG00000009780	0.101974	2.23102	0.375709	0.44281
TRAF3IP3	protein_coding	ENSG00000009790	-0.560661	-3.76599	0.789677	0.838689
POMT2	protein_coding	ENSG00000009830	0.283812	6.05849	2.2559e-05	4.92815e-05
VTA1	protein_coding	ENSG00000009844	-0.926722	6.66543	1.87256e-39	2.04462e-38
MLXIPL	protein_coding	ENSG00000009950	3.34763	-2.04446	4.29333e-11	1.40393e-10
BAZ1B	protein_coding	ENSG00000009954	-0.383247	7.97967	7.10766e-09	2.02104e-08
RANBP9	protein_coding	ENSG00000010017	0.132007	5.46498	0.0548016	0.0783387
ETV7	protein_coding	ENSG00000010030	-0.101599	0.713713	0.778982	0.829465
SPRTN	protein_coding	ENSG00000010072	-0.603104	4.87826	2.71387e-17	1.23828e-16
METTL13	protein_coding	ENSG00000010165	-0.938602	6.02527	1.59923e-44	2.0867e-43
DYRK4	protein_coding	ENSG00000010219	-0.0483491	3.96655	0.558217	0.62463
ZNF207	protein_coding	ENSG00000010244	-0.730639	7.37053	9.17212e-31	7.24595e-30
UQCRC1	protein_coding	ENSG00000010256	0.137651	7.15398	0.0315322	0.0470172
STARD3NL	protein_coding	ENSG00000010270	-0.548893	6.0821	1.45413e-16	6.39623e-16
CD9	protein_coding	ENSG00000010278	0.0633655	7.38984	0.353802	0.419949
NCAPD2	protein_coding	ENSG00000010292	-0.273019	8.66313	6.20086e-05	0.000129597
IFFO1	protein_coding	ENSG00000010295	-0.162149	2.1225	0.177313	0.227177
GIPR	protein_coding	ENSG00000010310	-0.0752654	0.225825	0.780962	0.830949
PHF7	protein_coding	ENSG00000010318	1.00817	3.15796	1.95496e-26	1.30803e-25
SEMA3G	protein_coding	ENSG00000010319	2.22494	3.34781	2.76731e-103	1.73133e-101
NISCH	protein_coding	ENSG00000010322	0.84581	6.26182	3.6528e-36	3.56358e-35
FUZ	protein_coding	ENSG00000010361	0.505091	2.73921	1.371e-06	3.31551e-06
SLC6A13	protein_coding	ENSG00000010379	1.08117	-0.797951	0.000273168	0.000537345
IDS	protein_coding	ENSG00000010404	-0.329319	6.86268	3.86142e-07	9.72806e-07
ZNF200	protein_coding	ENSG00000010539	-0.714875	4.64488	3.17618e-22	1.79546e-21
CD4	protein_coding	ENSG00000010610	1.70327	-3.13694	0.0101509	0.0163428
LRRC23	protein_coding	ENSG00000010626	-0.362053	3.72583	1.15568e-05	2.58973e-05
BTK	protein_coding	ENSG00000010671	-1.92875	-2.64271	8.86232e-06	2.00495e-05
SCMH1	protein_coding	ENSG00000010803	0.283024	5.18525	7.70632e-05	0.000159881
FYN	protein_coding	ENSG00000010810	-0.263764	4.82668	0.000224703	0.000445467
HIVEP2	protein_coding	ENSG00000010818	-1.14683	5.87888	1.28522e-56	2.36857e-55
ELOA	protein_coding	ENSG00000011007	-1.53211	7.29971	8.82702e-118	7.59345e-116
LYPLA2	protein_coding	ENSG00000011009	0.304954	5.5781	1.94658e-05	4.27725e-05
CLCN6	protein_coding	ENSG00000011021	0.982953	5.34485	9.49383e-43	1.17031e-41
MRC2	protein_coding	ENSG00000011028	0.90864	8.97056	4.77381e-42	5.70938e-41
TSPAN9	protein_coding	ENSG00000011105	-0.0844015	5.60752	0.229393	0.286201
BTBD7	protein_coding	ENSG00000011114	-0.661302	5.50461	1.09626e-21	6.04801e-21
APBA3	protein_coding	ENSG00000011132	0.169831	3.54699	0.0559906	0.0798582
MKS1	protein_coding	ENSG00000011143	0.440169	4.38702	2.45109e-08	6.71666e-08
ABHD5	protein_coding	ENSG00000011198	0.11946	4.67815	0.12076	0.160775
ANOS1	protein_coding	ENSG00000011201	-0.132543	6.33957	0.0406837	0.0595388
AKAP8L	protein_coding	ENSG00000011243	-0.754554	5.70055	3.47897e-30	2.69014e-29
MBTD1	protein_coding	ENSG00000011258	-0.680336	4.28751	2.69732e-17	1.23143e-16
UTP18	protein_coding	ENSG00000011260	-1.10267	6.06744	6.75543e-60	1.38838e-58
RNF216	protein_coding	ENSG00000011275	-0.554629	7.48774	4.9214e-18	2.33258e-17
TTC19	protein_coding	ENSG00000011295	-0.147139	4.32135	0.0672323	0.0944546
PTBP1	protein_coding	ENSG00000011304	-0.323701	8.77902	3.5056e-07	8.86595e-07
DPF1	protein_coding	ENSG00000011332	0.636488	2.86281	2.88964e-09	8.45617e-09
SYT7	protein_coding	ENSG00000011347	0.263052	2.56206	0.0232948	0.0355286
LARS2	protein_coding	ENSG00000011376	-0.496312	5.38989	2.4621e-12	8.61663e-12
PIK3C2A	protein_coding	ENSG00000011405	-0.422441	7.05044	8.75216e-11	2.81422e-10
PLAUR	protein_coding	ENSG00000011422	-0.805476	7.14705	3.66106e-30	2.82822e-29
ANLN	protein_coding	ENSG00000011426	0.673963	9.29964	3.49474e-22	1.96953e-21
WIZ	protein_coding	ENSG00000011451	-0.0144202	5.70672	0.833985	0.877137
RABGAP1	protein_coding	ENSG00000011454	0.0343947	5.2677	0.635166	0.697544
DCN	protein_coding	ENSG00000011465	0.213563	-4.1319	0.832109	0.875585
QPCTL	protein_coding	ENSG00000011478	0.535753	4.52429	1.69402e-11	5.66879e-11
PPP5C	protein_coding	ENSG00000011485	-0.235705	6.82916	0.000235594	0.00046629
CEP68	protein_coding	ENSG00000011523	1.36494	4.3686	1.18008e-68	3.16885e-67
MAP4K3	protein_coding	ENSG00000011566	-0.520237	5.64715	1.98154e-14	7.81424e-14
TMEM159	protein_coding	ENSG00000011638	0.605738	2.9614	1.30397e-10	4.14528e-10
GABRA3	protein_coding	ENSG00000011677	-0.243289	4.27767	0.00286659	0.00498719
BRCA1	protein_coding	ENSG00000012048	1.21247	6.47424	2.75344e-72	8.11776e-71
ERCC1	protein_coding	ENSG00000012061	-0.587586	6.70209	2.4459e-19	1.2256e-18
CD22	protein_coding	ENSG00000012124	-0.0685313	0.331635	0.773841	0.824721
SEMA3B	protein_coding	ENSG00000012171	0.935805	4.63985	9.30174e-35	8.61735e-34
MBTPS2	protein_coding	ENSG00000012174	0.226403	4.27418	0.00325849	0.00563157
PRICKLE3	protein_coding	ENSG00000012211	-0.147866	4.16759	0.0701087	0.098118
LTF	protein_coding	ENSG00000012223	1.28559	0.0117808	1.46032e-08	4.06596e-08
EXTL3	protein_coding	ENSG00000012232	-0.66978	7.14473	3.14219e-25	2.00228e-24
NR1H4	protein_coding	ENSG00000012504	0.439161	-3.55577	1	1
ELOVL5	protein_coding	ENSG00000012660	-0.279167	8.35549	5.73117e-05	0.000120229
ALOX5	protein_coding	ENSG00000012779	2.09202	4.42731	4.55685e-150	7.3665e-148
CALCOCO1	protein_coding	ENSG00000012822	0.743587	5.11357	3.32702e-26	2.20523e-25
UBR7	protein_coding	ENSG00000012963	0.248585	5.31764	0.00064702	0.0012208
MAP4K5	protein_coding	ENSG00000012983	-0.653399	6.73391	3.24555e-22	1.83296e-21
EHD3	protein_coding	ENSG00000013016	-0.602837	4.65703	2.52735e-16	1.09786e-15
PSMC4	protein_coding	ENSG00000013275	-0.778641	6.64313	2.07505e-34	1.89684e-33
MAN2B2	protein_coding	ENSG00000013288	0.432403	5.48089	2.07512e-10	6.52866e-10
CLDN11	protein_coding	ENSG00000013297	0.846957	-1.82931	0.110515	0.148307
SLC25A39	protein_coding	ENSG00000013306	-0.0969341	7.62909	0.141367	0.185221
MVP	protein_coding	ENSG00000013364	-0.179992	6.48634	0.0069399	0.0114486
NUB1	protein_coding	ENSG00000013374	-0.597478	4.75147	9.26822e-16	3.91793e-15
PGM3	protein_coding	ENSG00000013375	-0.0542287	5.20427	0.448931	0.51719
RWDD2A	protein_coding	ENSG00000013392	1.1912	1.55312	2.6295e-20	1.36678e-19
CLK1	protein_coding	ENSG00000013441	0.184284	5.73226	0.00877942	0.0142644
POLR3B	protein_coding	ENSG00000013503	-0.697862	4.51394	7.24596e-19	3.55828e-18
ANGEL1	protein_coding	ENSG00000013523	0.780006	4.23739	7.92637e-24	4.77068e-23
RNF14	protein_coding	ENSG00000013561	0.07064	4.71201	0.327236	0.392302
DNASE1L1	protein_coding	ENSG00000013563	0.771075	5.01925	1.48392e-27	1.04056e-26
DDX11	protein_coding	ENSG00000013573	0.154482	6.19965	0.0204732	0.0315184
HEBP1	protein_coding	ENSG00000013583	0.796751	4.46701	7.89481e-24	4.75287e-23
GPRC5A	protein_coding	ENSG00000013588	-0.0697286	7.36126	0.272635	0.333772
MAMLD1	protein_coding	ENSG00000013619	-1.10245	4.55973	1.30774e-37	1.337e-36
TACC3	protein_coding	ENSG00000013810	1.11533	7.31776	1.1638e-62	2.61987e-61
UFL1	protein_coding	ENSG00000014123	-0.189149	5.14745	0.00655907	0.0108628
POLA2	protein_coding	ENSG00000014138	1.93904	2.05988	9.45946e-58	1.82426e-56
ZC3H3	protein_coding	ENSG00000014164	-0.159852	5.53891	0.0337487	0.0500404
CAPN1	protein_coding	ENSG00000014216	-0.0546704	6.24286	0.408073	0.476016
MDH1	protein_coding	ENSG00000014641	-0.473924	6.65549	1.39226e-13	5.23253e-13
SLC30A9	protein_coding	ENSG00000014824	-0.41456	6.2765	8.8477e-10	2.67429e-09
MTMR11	protein_coding	ENSG00000014914	1.09188	3.9699	6.0036e-40	6.68247e-39
COX15	protein_coding	ENSG00000014919	0.315563	3.92059	6.84162e-05	0.000142592
CCDC88C	protein_coding	ENSG00000015133	-2.04495	-0.433151	1.34598e-11	4.53055e-11
YAF2	protein_coding	ENSG00000015153	-0.738475	4.14287	1.57988e-21	8.66453e-21
ZMYND11	protein_coding	ENSG00000015171	-0.608386	5.28371	1.02493e-16	4.54564e-16
WAS	protein_coding	ENSG00000015285	0.272068	-2.55206	0.695953	0.754701
BID	protein_coding	ENSG00000015475	0.292625	4.9314	2.9574e-05	6.3882e-05
MATR3	protein_coding	ENSG00000015479	-0.53803	1.01327	0.000765243	0.00143086
NPC1L1	protein_coding	ENSG00000015520	-2.92299	-2.82899	1.0395e-06	2.54145e-06
XYLT2	protein_coding	ENSG00000015532	0.594325	5.64318	2.23864e-18	1.07866e-17
RGPD5	protein_coding	ENSG00000015568	0.155015	2.18653	0.19048	0.242307
STMN4	protein_coding	ENSG00000015592	-0.0973136	-3.07984	1	1
NUDCD3	protein_coding	ENSG00000015676	-0.510917	6.5618	1.53897e-15	6.43337e-15
ISL1	protein_coding	ENSG00000016082	-0.18358	-3.65301	0.768051	0.81971
CHDH	protein_coding	ENSG00000016391	1.8736	1.22358	1.2519e-33	1.10944e-32
IL20RA	protein_coding	ENSG00000016402	-0.570678	-1.70497	0.109976	0.147667
GLT8D1	protein_coding	ENSG00000016864	0.272009	4.88404	0.000111412	0.000227809
ATP2C1	protein_coding	ENSG00000017260	-0.243214	6.66266	0.000251836	0.000497007
IGF1	protein_coding	ENSG00000017427	0.594685	-2.5817	0.733726	0.789055
SLC38A5	protein_coding	ENSG00000017483	1.18816	0.115614	2.12055e-07	5.44481e-07
RALBP1	protein_coding	ENSG00000017797	-0.207234	7.56297	0.00210988	0.00373297
RUFY3	protein_coding	ENSG00000018189	0.398232	5.64961	2.54844e-09	7.48681e-09
CNTN1	protein_coding	ENSG00000018236	-0.617083	4.03481	4.90243e-13	1.78754e-12
SLC11A1	protein_coding	ENSG00000018280	2.68905	-2.62813	2.97328e-06	7.00004e-06
WWTR1	protein_coding	ENSG00000018408	-1.04515	6.01185	1.4097e-51	2.24871e-50
AGPS	protein_coding	ENSG00000018510	-0.541451	7.43885	1.55791e-16	6.83771e-16
CXorf56	protein_coding	ENSG00000018610	-0.906043	3.87713	5.86531e-26	3.85163e-25
ATP1A2	protein_coding	ENSG00000018625	3.81165	1.33371	2.45275e-110	1.79573e-108
TTC27	protein_coding	ENSG00000018699	-1.49511	5.11253	4.83923e-91	2.37883e-89
ZNF582	protein_coding	ENSG00000018869	-1.01565	1.88499	1.15882e-15	4.86876e-15
PHLDB1	protein_coding	ENSG00000019144	0.789774	6.98021	6.89582e-35	6.42304e-34
MARCO	protein_coding	ENSG00000019169	1.11126	4.08164	1.74116e-30	1.363e-29
CYP24A1	protein_coding	ENSG00000019186	1.16327	5.9735	8.90695e-54	1.51406e-52
PRDM11	protein_coding	ENSG00000019485	1.15357	4.26309	1.73498e-50	2.69269e-49
SYT13	protein_coding	ENSG00000019505	0.928519	0.28468	0.000253011	0.000499081
SNAI2	protein_coding	ENSG00000019549	-1.76641	4.79819	5.59374e-125	5.59072e-123
CD74	protein_coding	ENSG00000019582	-0.101831	-2.73229	1	1
HGF	protein_coding	ENSG00000019991	-1.85762	-3.3084	0.00186857	0.00332631
ZRANB1	protein_coding	ENSG00000019995	-0.0365717	5.7094	0.594967	0.659715
NCDN	protein_coding	ENSG00000020129	0.0724177	5.37426	0.309659	0.373816
ADGRA2	protein_coding	ENSG00000020181	1.1609	4.42102	4.50221e-47	6.39415e-46
ZFP64	protein_coding	ENSG00000020256	-0.463336	5.45195	6.30465e-12	2.15925e-11
MNAT1	protein_coding	ENSG00000020426	-0.485071	5.33564	2.545e-10	7.95708e-10
SAMD4A	protein_coding	ENSG00000020577	0.413342	7.11042	3.88242e-10	1.19954e-09
RUNX3	protein_coding	ENSG00000020633	-1.25329	3.97168	2.64088e-52	4.31554e-51
MRE11	protein_coding	ENSG00000020922	0.155115	5.60741	0.0223977	0.0342557
PLEKHB1	protein_coding	ENSG00000021300	-0.016525	0.926835	0.938228	0.96693
SERPINB1	protein_coding	ENSG00000021355	0.45431	3.95796	8.59279e-08	2.27345e-07
SLC7A9	protein_coding	ENSG00000021488	2.05215	-2.19627	0.000514484	0.000982274
SPAST	protein_coding	ENSG00000021574	-0.243143	5.20672	0.000452753	0.000869655
NRXN3	protein_coding	ENSG00000021645	2.39285	4.62206	2.75493e-194	8.61791e-192
OSBPL5	protein_coding	ENSG00000021762	1.32333	4.52371	2.62735e-64	6.18017e-63
AQR	protein_coding	ENSG00000021776	-0.640937	5.91656	1.83869e-21	1.00473e-20
CPS1	protein_coding	ENSG00000021826	-0.0626205	4.72836	0.419959	0.488273
FHL1	protein_coding	ENSG00000022267	-0.01868	6.3836	0.776173	0.826856
RTF2	protein_coding	ENSG00000022277	-0.924059	6.39692	3.574e-36	3.49095e-35
GABRA1	protein_coding	ENSG00000022355	-2.13248	1.00246	3.47648e-48	5.06582e-47
NLRP2	protein_coding	ENSG00000022556	-0.0134071	3.16058	0.892892	0.927104
SLC45A4	protein_coding	ENSG00000022567	0.357912	3.48598	8.72827e-05	0.00018023
RNF10	protein_coding	ENSG00000022840	-0.70556	6.90845	9.23332e-29	6.78886e-28
ZNF839	protein_coding	ENSG00000022976	0.738987	2.52576	5.46417e-10	1.67152e-09
ZDHHC6	protein_coding	ENSG00000023041	0.0961742	5.9635	0.144023	0.188286
GRAMD1B	protein_coding	ENSG00000023171	-1.75329	5.09361	1.10393e-122	1.05517e-120
RNH1	protein_coding	ENSG00000023191	-0.455761	6.2934	4.06406e-12	1.40668e-11
NDUFS1	protein_coding	ENSG00000023228	-0.475832	6.63569	6.10953e-13	2.2136e-12
RB1CC1	protein_coding	ENSG00000023287	-0.966301	6.6893	5.06607e-42	6.0529e-41
ERP44	protein_coding	ENSG00000023318	-0.15257	6.33207	0.0242208	0.0368243
ALAS1	protein_coding	ENSG00000023330	-0.556541	5.85489	1.02527e-16	4.54632e-16
BIRC3	protein_coding	ENSG00000023445	-4.42758	5.58688	2.67521e-60	5.57904e-59
AKAP11	protein_coding	ENSG00000023516	0.0215785	6.14467	0.750067	0.803543
GLRX2	protein_coding	ENSG00000023572	-0.557663	2.20331	9.47338e-07	2.32155e-06
SNAPC1	protein_coding	ENSG00000023608	1.07841	7.0084	1.11053e-37	1.13827e-36
DERA	protein_coding	ENSG00000023697	0.688912	4.65567	4.83694e-21	2.59887e-20
STRAP	protein_coding	ENSG00000023734	-1.30224	7.8815	1.62583e-74	5.04006e-73
ABCC2	protein_coding	ENSG00000023839	-0.507238	1.09481	0.00183314	0.00326734
DEF6	protein_coding	ENSG00000023892	0.582458	1.1936	0.000282446	0.000554554
PLEKHO1	protein_coding	ENSG00000023902	0.114194	5.16463	0.0942991	0.128218
GCLM	protein_coding	ENSG00000023909	-0.173473	5.3837	0.0132822	0.0210397
UBR2	protein_coding	ENSG00000024048	-0.273784	5.53278	0.000156347	0.000314694
EHD2	protein_coding	ENSG00000024422	1.01539	4.87149	5.18989e-40	5.80626e-39
DEPDC1	protein_coding	ENSG00000024526	0.236114	6.44127	0.000554687	0.00105452
CCDC28A	protein_coding	ENSG00000024862	-0.0900059	3.15458	0.352486	0.418614
RRAGD	protein_coding	ENSG00000025039	1.08988	3.87874	1.72766e-40	1.96479e-39
HSF2	protein_coding	ENSG00000025156	-0.0636336	3.9397	0.441902	0.510508
PHF20	protein_coding	ENSG00000025293	-0.133836	5.03357	0.0633951	0.0895074
HSD17B6	protein_coding	ENSG00000025423	0.564585	0.666101	0.00109164	0.00199987
NR1H3	protein_coding	ENSG00000025434	0.317244	2.78317	0.00187049	0.00332948
TYMP	protein_coding	ENSG00000025708	1.04535	-0.996414	0.000220932	0.000438496
NCAPH2	protein_coding	ENSG00000025770	0.340236	6.19792	1.1082e-06	2.70147e-06
TOMM34	protein_coding	ENSG00000025772	-0.76606	7.23741	2.17514e-31	1.75933e-30
SEC63	protein_coding	ENSG00000025796	-0.742984	6.97123	1.3909e-28	1.01492e-27
KPNA6	protein_coding	ENSG00000025800	-0.275686	6.43553	2.28254e-05	4.98454e-05
VIM	protein_coding	ENSG00000026025	-0.947272	11.2616	3.95955e-47	5.63342e-46
RTEL1-TNFRSF6B	protein_coding	ENSG00000026036	1.94014	0.252899	6.96957e-17	3.11921e-16
FAS	protein_coding	ENSG00000026103	0.0666386	5.16556	0.330203	0.395328
RNASET2	protein_coding	ENSG00000026297	0.935841	2.92161	7.51859e-17	3.35931e-16
CD44	protein_coding	ENSG00000026508	-1.13234	8.60747	4.97092e-70	1.36683e-68
KCNG1	protein_coding	ENSG00000026559	0.0134717	5.90266	0.842183	0.884177
AGPAT4	protein_coding	ENSG00000026652	0.453987	4.26756	2.93574e-08	8.00919e-08
SLAMF7	protein_coding	ENSG00000026751	0.71056	3.84225	1.92205e-17	8.84024e-17
BTN3A1	protein_coding	ENSG00000026950	1.47739	1.99396	2.93139e-33	2.5592e-32
MIPEP	protein_coding	ENSG00000027001	-0.263442	3.46073	0.00216734	0.00382704
PRKCH	protein_coding	ENSG00000027075	-0.327414	5.11484	5.80996e-05	0.000121818
INSRR	protein_coding	ENSG00000027644	0.883197	-0.893045	0.162602	0.21022
IFNGR1	protein_coding	ENSG00000027697	-0.470156	4.86052	9.6513e-11	3.0926e-10
B4GALT7	protein_coding	ENSG00000027847	0.390851	4.1125	1.9382e-06	4.63288e-06
SH2D2A	protein_coding	ENSG00000027869	0.18045	3.09175	0.241805	0.300054
VRK2	protein_coding	ENSG00000028116	0.0803047	6.07999	0.238436	0.296271
TNFRSF1B	protein_coding	ENSG00000028137	1.65618	-1.2793	7.0791e-06	1.61533e-05
VEZT	protein_coding	ENSG00000028203	0.184138	5.09698	0.0105766	0.0169929
POU2F2	protein_coding	ENSG00000028277	-1.87179	4.35295	3.42198e-114	2.79407e-112
BRD9	protein_coding	ENSG00000028310	-1.04488	5.86177	2.86364e-55	5.08302e-54
SNX1	protein_coding	ENSG00000028528	-0.546583	7.34137	4.62132e-18	2.19294e-17
TBPL1	protein_coding	ENSG00000028839	0.482173	4.67694	2.40792e-10	7.5432e-10
ARNTL2	protein_coding	ENSG00000029153	0.676606	5.86568	4.87942e-24	2.9717e-23
BCLAF1	protein_coding	ENSG00000029363	-1.6309	8.2726	2.51641e-122	2.39577e-120
SLC39A9	protein_coding	ENSG00000029364	-0.417836	7.00193	5.08091e-11	1.65675e-10
ANK1	protein_coding	ENSG00000029534	0.911723	1.93025	1.26066e-12	4.48864e-12
TFB1M	protein_coding	ENSG00000029639	-0.547584	3.28608	1.74427e-09	5.17799e-09
RABEP1	protein_coding	ENSG00000029725	-0.232204	5.86812	0.00114695	0.00209451
HMGB3	protein_coding	ENSG00000029993	-1.04594	6.18817	3.58495e-50	5.50354e-49
NUP160	protein_coding	ENSG00000030066	-0.646786	6.81762	4.89913e-23	2.85313e-22
BAK1	protein_coding	ENSG00000030110	-0.681577	5.62089	4.59186e-21	2.46884e-20
IKZF2	protein_coding	ENSG00000030419	0.815949	2.9963	9.2327e-18	4.31068e-17
GRN	protein_coding	ENSG00000030582	0.416066	7.214	1.1624e-09	3.48633e-09
FAM13B	protein_coding	ENSG00000031003	-0.274187	5.59786	9.713e-05	0.000199622
ARHGAP31	protein_coding	ENSG00000031081	0.273035	6.08794	0.000128493	0.000260984
CENPQ	protein_coding	ENSG00000031691	0.633786	3.76169	1.07388e-11	3.63143e-11
SARS	protein_coding	ENSG00000031698	-0.171219	8.0228	0.0104522	0.0168009
RANBP3	protein_coding	ENSG00000031823	-0.418777	5.63843	2.61758e-10	8.17872e-10
ARID4A	protein_coding	ENSG00000032219	0.0479834	5.12854	0.544025	0.610763
EIPR1	protein_coding	ENSG00000032389	-0.464107	3.4491	6.26632e-07	1.55349e-06
PNPLA6	protein_coding	ENSG00000032444	0.41886	5.46939	1.04602e-08	2.93997e-08
IFT88	protein_coding	ENSG00000032742	-0.458644	2.84958	2.98902e-06	7.03383e-06
ALG1	protein_coding	ENSG00000033011	-0.511279	4.6033	2.21227e-12	7.77232e-12
ZCCHC8	protein_coding	ENSG00000033030	0.283464	5.35276	3.42691e-05	7.35882e-05
ABCF2	protein_coding	ENSG00000033050	-0.880209	3.07729	4.94806e-19	2.44731e-18
CHPF2	protein_coding	ENSG00000033100	-0.937732	4.01807	1.12668e-31	9.23073e-31
LRRC7	protein_coding	ENSG00000033122	1.61881	-0.186323	2.6246e-14	1.02711e-13
FUT8	protein_coding	ENSG00000033170	0.315891	6.26716	1.98892e-06	4.74657e-06
UBA6	protein_coding	ENSG00000033178	-0.320405	6.82798	8.93859e-07	2.19451e-06
GAB2	protein_coding	ENSG00000033327	0.676113	4.5145	3.31852e-19	1.65253e-18
ATP6V0A1	protein_coding	ENSG00000033627	1.15104	-0.140471	7.0229e-08	1.86918e-07
PIAS1	protein_coding	ENSG00000033800	0.0223378	5.62597	0.742273	0.796575
SLC4A7	protein_coding	ENSG00000033867	-0.279447	5.88013	3.71247e-05	7.95076e-05
APBA2	protein_coding	ENSG00000034053	0.552019	4.63779	9.47019e-14	3.58718e-13
MAP2K3	protein_coding	ENSG00000034152	-1.97341	6.92867	1.91178e-159	3.71363e-157
EFCAB1	protein_coding	ENSG00000034239	-0.465784	-1.90237	0.356561	0.422828
TMSB10	protein_coding	ENSG00000034510	-0.552318	9.31011	3.6408e-15	1.49168e-14
ASTE1	protein_coding	ENSG00000034533	-0.46825	2.79705	1.59274e-06	3.83068e-06
RNF19A	protein_coding	ENSG00000034677	-0.454034	6.13183	5.26476e-12	1.81109e-11
PEX3	protein_coding	ENSG00000034693	-0.272591	4.30472	0.000894234	0.00165688
GABARAPL2	protein_coding	ENSG00000034713	-0.352056	5.4979	6.17326e-07	1.53168e-06
SH3YL1	protein_coding	ENSG00000035115	-0.931531	2.21966	4.14334e-16	1.77771e-15
FAM136A	protein_coding	ENSG00000035141	-0.492125	7.04033	8.6108e-13	3.09888e-12
VCL	protein_coding	ENSG00000035403	0.263339	8.25651	4.49075e-05	9.53858e-05
DEPDC1B	protein_coding	ENSG00000035499	-0.278253	5.57948	7.30729e-05	0.00015193
DAPK2	protein_coding	ENSG00000035664	1.84418	1.61345	3.07308e-34	2.7922e-33
NSMAF	protein_coding	ENSG00000035681	-0.362473	6.00168	1.02545e-07	2.69562e-07
ADSS	protein_coding	ENSG00000035687	0.00576339	5.44453	0.936605	0.965517
TIMP2	protein_coding	ENSG00000035862	0.625138	7.92251	1.1154e-20	5.90088e-20
RFC1	protein_coding	ENSG00000035928	-0.296303	7.5343	2.04757e-05	4.49057e-05
TBC1D23	protein_coding	ENSG00000036054	-0.673964	5.88452	1.47187e-22	8.40717e-22
CUL3	protein_coding	ENSG00000036257	-1.34712	7.06685	4.6996e-90	2.25048e-88
MYOM2	protein_coding	ENSG00000036448	-0.241356	1.77778	0.0571903	0.0814487
CYP46A1	protein_coding	ENSG00000036530	0.419812	-1.71369	0.241423	0.299595
AC118549.1	protein_coding	ENSG00000036549	-0.637398	6.19526	5.58849e-20	2.87505e-19
USP2	protein_coding	ENSG00000036672	2.08587	-0.841947	1.97652e-14	7.7957e-14
TUBG2	protein_coding	ENSG00000037042	0.864791	2.03306	2.7969e-13	1.03358e-12
RPL26L1	protein_coding	ENSG00000037241	-0.739555	4.93075	1.65108e-17	7.62015e-17
FLT4	protein_coding	ENSG00000037280	1.25494	4.3258	2.79601e-57	5.29461e-56
NSUN2	protein_coding	ENSG00000037474	-1.04734	7.93566	3.67842e-57	6.95463e-56
FBXO42	protein_coding	ENSG00000037637	1.12754	3.93608	5.73493e-41	6.61893e-40
MFAP3	protein_coding	ENSG00000037749	-0.558569	5.88467	4.03942e-17	1.82959e-16
MRI1	protein_coding	ENSG00000037757	0.710431	4.03435	7.97526e-20	4.07164e-19
METTL1	protein_coding	ENSG00000037897	-0.506545	3.91137	4.36834e-09	1.26178e-08
HOXC8	protein_coding	ENSG00000037965	-0.966213	3.90411	1.30582e-32	1.11497e-31
AGA	protein_coding	ENSG00000038002	0.0384522	3.5911	0.659797	0.721011
PI4K2B	protein_coding	ENSG00000038210	1.01701	2.3658	5.07757e-18	2.40518e-17
BOD1L1	protein_coding	ENSG00000038219	-1.06182	6.6629	4.67415e-36	4.54344e-35
MAT2B	protein_coding	ENSG00000038274	-0.594446	5.45614	4.87612e-19	2.41321e-18
TLL1	protein_coding	ENSG00000038295	1.18253	-0.0342589	2.19267e-07	5.62278e-07
EDC4	protein_coding	ENSG00000038358	-0.185661	6.15973	0.00503796	0.00848537
TRIO	protein_coding	ENSG00000038382	-0.708364	8.49665	2.50096e-26	1.66503e-25
VCAN	protein_coding	ENSG00000038427	-1.18963	-0.959072	0.000150001	0.000302298
CLEC16A	protein_coding	ENSG00000038532	-0.19028	6.1454	0.00487483	0.00822615
MSR1	protein_coding	ENSG00000038945	2.37676	-2.64257	0.000298679	0.000584902
CDH1	protein_coding	ENSG00000039068	2.98469	2.5409	2.85398e-112	2.21041e-110
MTREX	protein_coding	ENSG00000039123	-0.833778	6.9263	2.37624e-33	2.08436e-32
DNAH5	protein_coding	ENSG00000039139	1.06946	1.59474	7.59431e-12	2.58989e-11
ZFYVE16	protein_coding	ENSG00000039319	0.599403	5.76633	1.15314e-17	5.35902e-17
RIPOR1	protein_coding	ENSG00000039523	0.145268	6.56551	0.027679	0.0417133
RAI14	protein_coding	ENSG00000039560	-0.530364	7.61271	6.32892e-15	2.56081e-14
SOX30	protein_coding	ENSG00000039600	-1.50132	-3.80123	0.152429	0.198151
PNKP	protein_coding	ENSG00000039650	0.0173687	5.08538	0.820995	0.866465
BEST2	protein_coding	ENSG00000039987	-1.15973	-1.97014	0.00744898	0.0122356
PHLPP2	protein_coding	ENSG00000040199	-0.268914	6.18644	5.1272e-05	0.000108143
SPDL1	protein_coding	ENSG00000040275	0.00392883	6.21676	0.955903	0.983169
STAU2	protein_coding	ENSG00000040341	0.454246	5.72133	4.27196e-09	1.23528e-08
PQLC2	protein_coding	ENSG00000040487	0.974493	3.94647	1.72035e-29	1.29941e-28
CTNS	protein_coding	ENSG00000040531	0.476729	3.40718	1.35518e-07	3.53004e-07
RTN4R	protein_coding	ENSG00000040608	1.74372	3.87565	5.62341e-77	1.84287e-75
PHF23	protein_coding	ENSG00000040633	-0.683173	5.66507	6.02911e-24	3.6525e-23
CDH10	protein_coding	ENSG00000040731	1.07013	0.187035	0.014218	0.0224129
INPP4A	protein_coding	ENSG00000040933	0.667256	5.71068	3.55037e-23	2.07668e-22
RAB27B	protein_coding	ENSG00000041353	0.478684	1.10145	0.00101896	0.00187428
PSMA4	protein_coding	ENSG00000041357	-0.703142	7.58389	1.50533e-25	9.72086e-25
MYO16	protein_coding	ENSG00000041515	1.28413	1.86192	3.41442e-24	2.09163e-23
LSG1	protein_coding	ENSG00000041802	-0.912991	6.79371	5.5119e-46	7.61268e-45
PARP3	protein_coding	ENSG00000041880	1.01464	4.34459	1.30832e-36	1.29472e-35
TNC	protein_coding	ENSG00000041982	-1.10665	8.97666	8.03248e-61	1.71068e-59
THAP3	protein_coding	ENSG00000041988	-0.112226	2.90304	0.270188	0.33114
RIPOR3	protein_coding	ENSG00000042062	1.41249	-3.57015	0.16489	0.212949
TDP1	protein_coding	ENSG00000042088	-0.565948	4.35641	5.50108e-13	1.99946e-12
AIFM2	protein_coding	ENSG00000042286	-0.116735	5.73212	0.0951575	0.129276
SPATA7	protein_coding	ENSG00000042317	0.666482	2.45606	2.68723e-09	7.88396e-09
MED17	protein_coding	ENSG00000042429	-0.351968	2.30763	0.0019847	0.0035234
RETSAT	protein_coding	ENSG00000042445	0.844909	5.02715	1.96073e-32	1.65887e-31
CAPG	protein_coding	ENSG00000042493	0.896817	4.71049	3.47855e-32	2.90729e-31
AP2S1	protein_coding	ENSG00000042753	0.0221863	6.32542	0.733685	0.789046
USH2A	protein_coding	ENSG00000042781	-0.1895	-3.01009	0.770419	0.82191
TG	protein_coding	ENSG00000042832	1.24657	-1.37464	0.00140998	0.00254474
ADAM28	protein_coding	ENSG00000042980	3.81137	-0.0735512	2.08545e-37	2.11682e-36
BARX2	protein_coding	ENSG00000043039	-1.72699	-1.03812	2.0597e-09	6.08887e-09
DCUN1D1	protein_coding	ENSG00000043093	0.223074	5.4339	0.00106168	0.00194809
JADE2	protein_coding	ENSG00000043143	-0.418441	6.00198	3.91611e-10	1.20933e-09
LCP2	protein_coding	ENSG00000043462	-1.56823	-3.50428	0.315785	0.379936
TRIT1	protein_coding	ENSG00000043514	-0.728419	4.82673	8.48875e-22	4.70692e-21
ADRB1	protein_coding	ENSG00000043591	-0.102382	-3.78851	1	1
CUL7	protein_coding	ENSG00000044090	0.543482	5.35038	2.66544e-15	1.10049e-14
CTNNA1	protein_coding	ENSG00000044115	-1.07579	8.42564	9.96154e-60	2.04034e-58
PHKA2	protein_coding	ENSG00000044446	0.390991	4.45347	1.48216e-07	3.84666e-07
CNTLN	protein_coding	ENSG00000044459	1.19623	3.14633	3.5806e-34	3.23989e-33
EPHA3	protein_coding	ENSG00000044524	2.29607	-2.35966	3.33079e-06	7.80815e-06
HSPA5	protein_coding	ENSG00000044574	-0.72186	9.9181	6.67925e-27	4.55759e-26
DSG2	protein_coding	ENSG00000046604	-0.177457	6.77452	0.0058596	0.00977494
GEMIN8	protein_coding	ENSG00000046647	-0.656903	1.00551	1.3781e-05	3.0673e-05
OFD1	protein_coding	ENSG00000046651	0.320266	4.08966	7.41254e-05	0.000153985
GPM6B	protein_coding	ENSG00000046653	0.437277	0.410627	0.021284	0.0326582
MAGEC2	protein_coding	ENSG00000046774	0.695236	-2.85621	0.277774	0.339494
PREX2	protein_coding	ENSG00000046889	1.40958	0.313221	2.2718e-11	7.555e-11
WDR37	protein_coding	ENSG00000047056	-0.0608715	3.00367	0.543913	0.610666
YTHDC2	protein_coding	ENSG00000047188	0.0849435	5.39525	0.224147	0.280353
CTPS2	protein_coding	ENSG00000047230	1.11438	2.33257	9.42223e-24	5.65263e-23
ATP6V1H	protein_coding	ENSG00000047249	-0.163804	4.65886	0.0242353	0.0368402
POLR2B	protein_coding	ENSG00000047315	-0.582487	7.94921	6.2299e-19	3.06996e-18
FAM214A	protein_coding	ENSG00000047346	-0.163489	2.29458	0.144887	0.189277
ARAP2	protein_coding	ENSG00000047365	-0.478009	6.19288	3.17187e-10	9.83787e-10
TPR	protein_coding	ENSG00000047410	-0.184297	8.03372	0.00652077	0.010806
CP	protein_coding	ENSG00000047457	0.119599	-2.56499	0.910694	0.942425
KIAA0556	protein_coding	ENSG00000047578	0.521377	5.08943	9.06301e-14	3.43618e-13
DTNBP1	protein_coding	ENSG00000047579	-0.265007	3.05306	0.00463035	0.0078339
XK	protein_coding	ENSG00000047597	1.09327	1.43212	3.41428e-13	1.25568e-12
ANO2	protein_coding	ENSG00000047617	1.03755	5.59896	6.10255e-52	9.84543e-51
C12orf4	protein_coding	ENSG00000047621	-0.409282	4.99948	1.77352e-08	4.90288e-08
SCML1	protein_coding	ENSG00000047634	-0.249618	4.75221	0.00105707	0.00194067
WWC3	protein_coding	ENSG00000047644	-0.0868095	2.64141	0.388868	0.455954
ARHGAP6	protein_coding	ENSG00000047648	1.63404	0.796204	1.77073e-19	8.93975e-19
FAM184B	protein_coding	ENSG00000047662	0.157837	-2.70381	1	1
MAP4	protein_coding	ENSG00000047849	-0.486237	8.75793	3.22213e-13	1.18726e-12
GOPC	protein_coding	ENSG00000047932	1.09893	5.65619	9.54212e-52	1.53227e-50
ROS1	protein_coding	ENSG00000047936	1.83547	3.86956	1.45278e-73	4.37961e-72
USP28	protein_coding	ENSG00000048028	0.40682	5.90125	5.85001e-09	1.6739e-08
HDAC9	protein_coding	ENSG00000048052	-1.44383	5.3146	8.50972e-85	3.53403e-83
TSPAN17	protein_coding	ENSG00000048140	-0.300615	6.92365	2.98909e-06	7.03383e-06
NOP16	protein_coding	ENSG00000048162	-1.0224	5.89425	3.47105e-50	5.34183e-49
CC2D2A	protein_coding	ENSG00000048342	-0.646133	4.2704	1.15867e-16	5.12467e-16
RRM2B	protein_coding	ENSG00000048392	-0.150528	7.50715	0.0213516	0.0327535
ZNF800	protein_coding	ENSG00000048405	-0.21426	4.53067	0.00368793	0.00632927
SNX29	protein_coding	ENSG00000048471	1.42218	3.57808	1.83428e-51	2.91633e-50
LMO3	protein_coding	ENSG00000048540	0.196931	-3.12733	0.873518	0.910408
MRPS10	protein_coding	ENSG00000048544	-0.172848	5.83843	0.0127313	0.0202268
RSF1	protein_coding	ENSG00000048649	-0.211629	6.58254	0.00266079	0.00465097
VPS13D	protein_coding	ENSG00000048707	-0.0344588	5.89566	0.655855	0.717127
CELF2	protein_coding	ENSG00000048740	0.0167721	2.22471	0.896578	0.930095
FAM120A	protein_coding	ENSG00000048828	-0.613018	7.69632	1.55468e-21	8.53018e-21
R3HDM1	protein_coding	ENSG00000048991	-0.383709	6.0736	8.33873e-08	2.20768e-07
COL9A2	protein_coding	ENSG00000049089	1.01351	4.52962	2.43509e-38	2.56131e-37
KITLG	protein_coding	ENSG00000049130	-1.38478	5.25265	1.44925e-63	3.3501e-62
ERCC8	protein_coding	ENSG00000049167	-0.3251	3.76395	0.000170884	0.000343007
ADAMTS6	protein_coding	ENSG00000049192	-0.63503	6.13186	9.3076e-18	4.34481e-17
H6PD	protein_coding	ENSG00000049239	1.0078	4.91852	1.60094e-36	1.57976e-35
VAMP3	protein_coding	ENSG00000049245	-0.516219	6.00988	2.99059e-15	1.23072e-14
PER3	protein_coding	ENSG00000049246	-0.0596596	5.40136	0.397617	0.465103
TNFRSF9	protein_coding	ENSG00000049249	-0.321673	4.363	6.1616e-05	0.000128843
EPN3	protein_coding	ENSG00000049283	2.50446	-0.427053	5.61583e-26	3.69082e-25
LTBP1	protein_coding	ENSG00000049323	0.7947	7.01609	1.75157e-31	1.42582e-30
RCN1	protein_coding	ENSG00000049449	-0.118412	7.28393	0.0700121	0.0979941
ELN	protein_coding	ENSG00000049540	1.23293	-3.74641	0.135806	0.178704
RFC2	protein_coding	ENSG00000049541	0.0751479	6.07407	0.270938	0.331914
ARID1B	protein_coding	ENSG00000049618	0.393127	6.5366	3.54035e-08	9.59995e-08
CLPTM1L	protein_coding	ENSG00000049656	-0.0368279	8.76368	0.55979	0.626245
NEDD4L	protein_coding	ENSG00000049759	-1.59856	7.27272	1.36323e-129	1.4858e-127
FOXP3	protein_coding	ENSG00000049768	-0.0879367	0.787331	0.645806	0.707681
PPP1R3F	protein_coding	ENSG00000049769	0.313867	1.53294	0.0321662	0.0478855
HEXB	protein_coding	ENSG00000049860	0.0461801	5.2957	0.494154	0.562349
PTCD2	protein_coding	ENSG00000049883	-0.685083	4.26038	2.90599e-19	1.4507e-18
NEXMIF	protein_coding	ENSG00000050030	2.89503	0.0698142	2.23137e-37	2.26208e-36
JKAMP	protein_coding	ENSG00000050130	-0.205497	6.14716	0.00207692	0.0036779
DKK3	protein_coding	ENSG00000050165	-0.234908	7.65893	0.000184365	0.000368777
ARHGEF5	protein_coding	ENSG00000050327	0.868164	-0.519859	0.000480202	0.000919664
MCUR1	protein_coding	ENSG00000050393	-0.442732	5.15421	1.17292e-10	3.73803e-10
LIMA1	protein_coding	ENSG00000050405	-0.0342089	7.91592	0.60903	0.672552
LETMD1	protein_coding	ENSG00000050426	1.03545	4.85094	1.47509e-43	1.85926e-42
SLC4A8	protein_coding	ENSG00000050438	-0.768991	4.20094	1.10618e-19	5.62358e-19
LAMC3	protein_coding	ENSG00000050555	0.434617	5.81076	1.10428e-09	3.31823e-09
PTGER3	protein_coding	ENSG00000050628	0.879061	-1.53768	0.00453357	0.00768203
TNIP3	protein_coding	ENSG00000050730	-0.0578609	-0.363172	0.862708	0.901403
MAPK9	protein_coding	ENSG00000050748	0.563163	6.0312	2.7532e-17	1.25551e-16
BCAR1	protein_coding	ENSG00000050820	0.584286	6.70395	1.65268e-19	8.3543e-19
FAM160A2	protein_coding	ENSG00000051009	0.286058	4.54142	0.000115828	0.000236396
HERPUD1	protein_coding	ENSG00000051108	0.0733198	6.70387	0.261292	0.321568
HOMER3	protein_coding	ENSG00000051128	-0.361704	4.31174	5.64403e-06	1.29944e-05
RAD51	protein_coding	ENSG00000051180	0.182625	-3.58675	0.835753	0.878613
POLQ	protein_coding	ENSG00000051341	2.01584	6.25189	2.11642e-190	6.21686e-188
PIK3CB	protein_coding	ENSG00000051382	0.0681815	4.6447	0.374864	0.4419
CYBA	protein_coding	ENSG00000051523	3.73896	-1.74717	1.5825e-16	6.94309e-16
THOC3	protein_coding	ENSG00000051596	-0.0744766	5.40065	0.299399	0.362922
HEBP2	protein_coding	ENSG00000051620	-0.266984	5.87096	3.49623e-05	7.50166e-05
MPHOSPH9	protein_coding	ENSG00000051825	0.322227	5.91568	2.51723e-06	5.95955e-06
PLEKHA5	protein_coding	ENSG00000052126	-0.233066	5.74636	0.000577368	0.00109539
PRSS8	protein_coding	ENSG00000052344	2.44838	-0.924403	2.4548e-14	9.6395e-14
SIKE1	protein_coding	ENSG00000052723	-0.281796	6.16288	1.1614e-05	2.60083e-05
RRP12	protein_coding	ENSG00000052749	-1.24306	6.7664	3.46203e-78	1.17616e-76
FNIP2	protein_coding	ENSG00000052795	0.740484	4.15846	3.70468e-20	1.91573e-19
MSMO1	protein_coding	ENSG00000052802	1.08742	6.47579	1.20578e-51	1.92981e-50
TTC17	protein_coding	ENSG00000052841	-0.113034	5.94625	0.0878788	0.120235
ALX4	protein_coding	ENSG00000052850	1.87789	-0.839029	1.31511e-12	4.67422e-12
FSTL4	protein_coding	ENSG00000053108	0.718147	-0.81303	0.00429621	0.00730604
FOXN3	protein_coding	ENSG00000053254	0.827965	6.16168	2.40774e-31	1.94484e-30
AKR7A2	protein_coding	ENSG00000053371	0.867831	5.02047	4.76229e-35	4.46166e-34
MRTO4	protein_coding	ENSG00000053372	-1.4095	6.76038	1.80221e-92	9.25581e-91
USE1	protein_coding	ENSG00000053501	-0.629376	2.78842	1.28204e-09	3.8337e-09
MCF2L2	protein_coding	ENSG00000053524	2.03784	1.11775	3.28658e-35	3.08993e-34
LAMA3	protein_coding	ENSG00000053747	1.08568	4.1634	6.84797e-28	4.85853e-27
AP5M1	protein_coding	ENSG00000053770	-0.217938	5.7214	0.00183265	0.00326671
ANAPC4	protein_coding	ENSG00000053900	0.0456798	4.18781	0.556572	0.623165
KCNQ1	protein_coding	ENSG00000053918	1.26895	-2.85541	0.0216826	0.0332274
TRAPPC3	protein_coding	ENSG00000054116	-0.512672	5.9164	7.13529e-14	2.72201e-13
THRAP3	protein_coding	ENSG00000054118	-0.889713	8.38184	5.72157e-40	6.38626e-39
PHPT1	protein_coding	ENSG00000054148	0.62092	5.22515	1.13278e-17	5.26745e-17
ARID4B	protein_coding	ENSG00000054267	-0.953588	5.8281	1.5869e-41	1.87005e-40
OPN3	protein_coding	ENSG00000054277	-2.2298	-0.136459	1.47061e-20	7.73252e-20
SDCCAG8	protein_coding	ENSG00000054282	0.942892	3.19009	5.12347e-22	2.86531e-21
PTPRN	protein_coding	ENSG00000054356	0.0563212	8.12195	0.396588	0.464102
HHAT	protein_coding	ENSG00000054392	0.935734	5.15867	2.95587e-36	2.8907e-35
KIF1B	protein_coding	ENSG00000054523	-0.339252	6.6228	1.89269e-06	4.53038e-06
FOXC1	protein_coding	ENSG00000054598	-1.27461	4.14017	1.15692e-56	2.14031e-55
TBC1D22A	protein_coding	ENSG00000054611	-0.209478	4.92321	0.00327546	0.00565847
SYNE2	protein_coding	ENSG00000054654	2.16302	6.85267	1.82794e-56	3.35848e-55
PLEKHH1	protein_coding	ENSG00000054690	2.28588	4.40009	4.89383e-172	1.12264e-169
ATP9A	protein_coding	ENSG00000054793	0.765056	5.47647	5.45854e-30	4.19795e-29
CBLN4	protein_coding	ENSG00000054803	-0.451452	-0.527953	0.0412336	0.0602593
FAM168A	protein_coding	ENSG00000054965	0.0274607	6.10849	0.681186	0.741123
RELT	protein_coding	ENSG00000054967	-0.39373	4.65608	4.1424e-07	1.04087e-06
GALC	protein_coding	ENSG00000054983	0.394613	5.39787	9.9448e-09	2.80131e-08
NOP58	protein_coding	ENSG00000055044	-1.70807	7.79746	1.4499e-132	1.67903e-130
SZRD1	protein_coding	ENSG00000055070	-0.597535	7.75458	9.57639e-20	4.87976e-19
KCNH2	protein_coding	ENSG00000055118	1.02162	2.22447	1.73659e-19	8.77107e-19
CUL1	protein_coding	ENSG00000055130	-0.526174	5.32714	1.30583e-13	4.91771e-13
FAM114A2	protein_coding	ENSG00000055147	-0.234788	4.32869	0.00210011	0.00371692
CYFIP2	protein_coding	ENSG00000055163	0.916828	5.86222	1.31106e-41	1.55029e-40
TAB2	protein_coding	ENSG00000055208	-0.859229	7.25717	1.35889e-38	1.44511e-37
GINM1	protein_coding	ENSG00000055211	0.0609352	5.78525	0.360077	0.42664
EIF2AK2	protein_coding	ENSG00000055332	0.295842	6.84152	5.4642e-06	1.259e-05
USP36	protein_coding	ENSG00000055483	-1.46239	7.25979	1.18471e-107	8.22364e-106
KMT2C	protein_coding	ENSG00000055609	-0.557141	4.94519	3.09331e-12	1.0778e-11
CCDC85A	protein_coding	ENSG00000055813	0.868443	2.03679	3.14247e-14	1.22302e-13
PUM2	protein_coding	ENSG00000055917	-0.4625	7.23536	2.69721e-12	9.42655e-12
MRPL43	protein_coding	ENSG00000055950	-0.729992	5.34669	7.96165e-27	5.41424e-26
ITIH4	protein_coding	ENSG00000055955	-0.483119	-3.74509	1	1
HPF1	protein_coding	ENSG00000056050	-0.31712	4.35757	8.34385e-05	0.000172514
ZFR	protein_coding	ENSG00000056097	-1.07304	8.02768	1.33573e-48	1.96661e-47
ZNF280C	protein_coding	ENSG00000056277	-0.488415	3.19479	1.72024e-07	4.44395e-07
NPFFR2	protein_coding	ENSG00000056291	-0.110308	4.38713	0.139456	0.183007
PHF21B	protein_coding	ENSG00000056487	0.0682211	3.40188	0.44248	0.5109
TRAF1	protein_coding	ENSG00000056558	-3.02901	3.75293	7.01214e-65	1.67727e-63
RC3H2	protein_coding	ENSG00000056586	-0.0441953	5.90639	0.524807	0.592271
IL17RB	protein_coding	ENSG00000056736	2.3498	1.73245	1.9372e-64	4.56123e-63
TRAF3IP2	protein_coding	ENSG00000056972	0.398608	2.7509	4.30895e-05	9.17113e-05
GYG2	protein_coding	ENSG00000056998	0.360602	2.9062	0.000167344	0.000336126
DCBLD2	protein_coding	ENSG00000057019	-0.432208	9.45978	8.87839e-11	2.85329e-10
SOAT1	protein_coding	ENSG00000057252	-0.342927	6.54048	9.8427e-08	2.59247e-07
PKP2	protein_coding	ENSG00000057294	1.42958	5.22192	6.43935e-91	3.15253e-89
MSH4	protein_coding	ENSG00000057468	-0.757993	-1.17882	0.0166905	0.0260395
GDI2	protein_coding	ENSG00000057608	-0.682079	8.38075	1.81154e-24	1.12171e-23
PRDM1	protein_coding	ENSG00000057657	-3.18322	3.00888	2.69099e-171	6.05775e-169
ATG5	protein_coding	ENSG00000057663	-0.896123	4.83858	4.61161e-34	4.15718e-33
TMCC3	protein_coding	ENSG00000057704	-1.08951	0.184032	2.62829e-08	7.18914e-08
PITHD1	protein_coding	ENSG00000057757	-0.244253	5.91714	0.00030292	0.000592675
MTA3	protein_coding	ENSG00000057935	0.711833	5.38703	1.67149e-25	1.07823e-24
USP13	protein_coding	ENSG00000058056	0.305691	5.83888	8.11597e-06	1.84163e-05
ATP11B	protein_coding	ENSG00000058063	-0.177527	7.11374	0.00617141	0.0102638
LAMC2	protein_coding	ENSG00000058085	-0.301118	7.93139	1.62247e-06	3.90101e-06
CDK14	protein_coding	ENSG00000058091	0.294379	6.25891	1.61625e-05	3.57622e-05
SEC61A1	protein_coding	ENSG00000058262	-0.648246	8.76824	2.44904e-23	1.4423e-22
PPP1R12A	protein_coding	ENSG00000058272	-0.398744	6.61984	1.75526e-08	4.85519e-08
RASGRF1	protein_coding	ENSG00000058335	0.222661	6.87306	0.000953767	0.00175987
CAMK2B	protein_coding	ENSG00000058404	2.72425	0.798727	4.94948e-31	3.94631e-30
CROCC	protein_coding	ENSG00000058453	0.813222	4.80388	4.84123e-23	2.82009e-22
POLR3E	protein_coding	ENSG00000058600	-0.581931	5.94085	2.492e-19	1.2474e-18
ATP2B4	protein_coding	ENSG00000058668	-0.0746823	5.97418	0.286302	0.349031
ZC3H11A	protein_coding	ENSG00000058673	-1.94459	-2.26822	7.86064e-06	1.78706e-05
RIOK2	protein_coding	ENSG00000058729	-1.07868	5.36235	9.91499e-49	1.46607e-47
YIPF1	protein_coding	ENSG00000058799	-0.130729	4.27276	0.0964981	0.130883
NDC1	protein_coding	ENSG00000058804	-0.507556	6.44946	1.46241e-14	5.81366e-14
DGKG	protein_coding	ENSG00000058866	0.686807	2.34974	2.31398e-09	6.82131e-09
FLYWCH1	protein_coding	ENSG00000059122	1.21997	5.22279	3.37361e-63	7.717e-62
UNKL	protein_coding	ENSG00000059145	1.24479	5.42866	9.91501e-68	2.56799e-66
TBXAS1	protein_coding	ENSG00000059377	0.672487	0.459778	0.000138392	0.000280145
PARP12	protein_coding	ENSG00000059378	0.674796	4.34019	4.81439e-18	2.28276e-17
ALDH18A1	protein_coding	ENSG00000059573	-0.81224	7.29626	3.26998e-37	3.29419e-36
TARBP1	protein_coding	ENSG00000059588	0.356773	2.42448	0.00130597	0.00236732
GATB	protein_coding	ENSG00000059691	-0.86041	3.99713	3.11856e-25	1.98774e-24
MXD1	protein_coding	ENSG00000059728	0.365523	2.75407	0.000558682	0.00106161
CDK17	protein_coding	ENSG00000059758	-0.965313	4.78024	1.70007e-35	1.6192e-34
DNAJC25	protein_coding	ENSG00000059769	-1.48404	3.54095	1.06799e-60	2.26051e-59
SLC2A3	protein_coding	ENSG00000059804	-0.925739	5.67057	6.50063e-44	8.28907e-43
PSD	protein_coding	ENSG00000059915	0.851384	2.15391	1.61164e-11	5.39835e-11
CTDP1	protein_coding	ENSG00000060069	-0.480948	5.7029	2.92733e-13	1.08079e-12
YBX3	protein_coding	ENSG00000060138	-0.513785	8.88793	1.54789e-15	6.46841e-15
STYK1	protein_coding	ENSG00000060140	1.55272	2.3092	7.27881e-41	8.36473e-40
WNK1	protein_coding	ENSG00000060237	-0.255716	8.40569	0.000157955	0.00031777
CCAR1	protein_coding	ENSG00000060339	-0.534734	7.56722	6.93664e-16	2.95199e-15
OGFR	protein_coding	ENSG00000060491	-0.0730871	7.09745	0.26918	0.330062
GNA15	protein_coding	ENSG00000060558	1.2917	-1.17654	0.000848427	0.0015771
CREB3L3	protein_coding	ENSG00000060566	5.5653	-3.61846	0.000878508	0.00162937
PIGV	protein_coding	ENSG00000060642	1.3386	3.49593	1.23287e-49	1.86534e-48
PTPRU	protein_coding	ENSG00000060656	1.15285	5.7191	3.34416e-66	8.30419e-65
SNRNP40	protein_coding	ENSG00000060688	-0.0431213	5.93217	0.531037	0.598413
RIMBP2	protein_coding	ENSG00000060709	2.09147	1.13007	4.13246e-37	4.14398e-36
COL11A1	protein_coding	ENSG00000060718	1.42341	7.31421	6.05102e-99	3.50363e-97
QSER1	protein_coding	ENSG00000060749	-0.425771	7.60974	1.32131e-09	3.94771e-09
MPC1	protein_coding	ENSG00000060762	0.81684	4.16778	6.95312e-26	4.55356e-25
ACAA1	protein_coding	ENSG00000060971	0.162099	4.86829	0.0205539	0.0316347
BCAT1	protein_coding	ENSG00000060982	-0.484871	7.53383	5.53192e-14	2.12279e-13
HDAC7	protein_coding	ENSG00000061273	0.522271	6.93571	6.53163e-15	2.64105e-14
LZTS1	protein_coding	ENSG00000061337	2.45105	2.94456	2.36365e-125	2.39216e-123
PRDM6	protein_coding	ENSG00000061455	2.60092	-2.00484	6.75167e-09	1.92254e-08
SPAG4	protein_coding	ENSG00000061656	1.10402	1.64147	4.20785e-16	1.80474e-15
NCKAP1	protein_coding	ENSG00000061676	-0.753675	7.94037	2.07713e-31	1.68174e-30
MRPS35	protein_coding	ENSG00000061794	-0.924625	5.6337	1.98616e-32	1.67861e-31
GUCY1B1	protein_coding	ENSG00000061918	1.28418	1.28558	1.73587e-17	8.00072e-17
SFSWAP	protein_coding	ENSG00000061936	-0.725105	6.20974	1.20955e-27	8.51387e-27
TNK2	protein_coding	ENSG00000061938	0.434301	5.62306	1.01437e-08	2.85533e-08
MON2	protein_coding	ENSG00000061987	-0.257117	5.61493	0.00014071	0.00028448
CDH3	protein_coding	ENSG00000062038	0.972968	-1.10112	0.0219054	0.0335518
GPBP1	protein_coding	ENSG00000062194	-1.31646	6.65609	3.70384e-85	1.55697e-83
DGAT2	protein_coding	ENSG00000062282	0.0291358	3.27489	0.746845	0.800661
ZNF112	protein_coding	ENSG00000062370	-0.0918869	2.57618	0.406214	0.474032
CS	protein_coding	ENSG00000062485	-0.411936	7.92977	3.033e-10	9.42778e-10
LTK	protein_coding	ENSG00000062524	0.982003	-0.439701	0.000239714	0.000473938
MRPS24	protein_coding	ENSG00000062582	0.525133	0.660204	0.00141112	0.00254661
ELMO2	protein_coding	ENSG00000062598	0.108653	6.19166	0.0970232	0.131521
WAPL	protein_coding	ENSG00000062650	-0.701478	7.35403	9.09666e-25	5.69712e-24
VMP1	protein_coding	ENSG00000062716	0.0506845	8.00703	0.453326	0.521405
APPBP2	protein_coding	ENSG00000062725	0.391692	6.22493	2.9585e-09	8.65137e-09
POLD1	protein_coding	ENSG00000062822	0.0902564	6.54204	0.161397	0.208773
EIF4B	protein_coding	ENSG00000063046	-0.563586	9.34244	1.11414e-17	5.18373e-17
SLC6A16	protein_coding	ENSG00000063127	1.01545	2.57726	4.65057e-07	1.16479e-06
BICRA	protein_coding	ENSG00000063169	-0.711306	4.60055	1.07853e-16	4.77634e-16
SPHK2	protein_coding	ENSG00000063176	0.25488	3.91118	0.00645311	0.0107005
RPL18	protein_coding	ENSG00000063177	-0.375	8.01604	7.59261e-08	2.01635e-07
CA11	protein_coding	ENSG00000063180	0.00338895	4.27858	0.968524	0.994876
ISOC2	protein_coding	ENSG00000063241	-0.20418	5.12282	0.00389186	0.00665885
U2AF2	protein_coding	ENSG00000063244	-1.05336	8.41383	2.63807e-59	5.31742e-58
EPN1	protein_coding	ENSG00000063245	-0.251825	6.95077	9.39767e-05	0.000193438
MED29	protein_coding	ENSG00000063322	0.362124	5.30218	9.81335e-08	2.5853e-07
AHRR	protein_coding	ENSG00000063438	1.79958	3.12277	1.95496e-58	3.84088e-57
GSC2	protein_coding	ENSG00000063515	-0.548233	-3.78524	0.675706	0.736225
ZNF275	protein_coding	ENSG00000063587	0.295846	5.44062	1.94911e-05	4.28242e-05
MTMR1	protein_coding	ENSG00000063601	-0.0117034	5.0752	0.869319	0.906698
GPC1	protein_coding	ENSG00000063660	-0.0101938	8.79667	0.882093	0.918039
ADCK1	protein_coding	ENSG00000063761	1.12635	2.07144	6.43377e-19	3.16654e-18
HAGH	protein_coding	ENSG00000063854	0.655823	4.26057	3.8775e-17	1.75857e-16
RNF4	protein_coding	ENSG00000063978	-0.633285	6.17092	1.07318e-21	5.9234e-21
CASP8	protein_coding	ENSG00000064012	-0.141259	5.72762	0.0413313	0.0603874
LIMCH1	protein_coding	ENSG00000064042	0.479578	7.49855	6.07131e-11	1.97062e-10
INTS13	protein_coding	ENSG00000064102	-0.932117	6.09524	1.29077e-35	1.23622e-34
TM7SF3	protein_coding	ENSG00000064115	0.980562	6.74985	2.2987e-50	3.55384e-49
DLX3	protein_coding	ENSG00000064195	0.298765	-0.31793	0.246618	0.30546
SPA17	protein_coding	ENSG00000064199	-1.57072	3.71588	2.03899e-73	6.12383e-72
TSPAN32	protein_coding	ENSG00000064201	5.88176	-4.11275	0.000141289	0.000285553
WISP2	protein_coding	ENSG00000064205	2.11367	-2.48372	4.60537e-05	9.7675e-05
DMRT3	protein_coding	ENSG00000064218	0.591008	-1.50758	0.047778	0.0689697
ST3GAL6	protein_coding	ENSG00000064225	0.159272	2.46643	0.126039	0.167056
ATP2C2	protein_coding	ENSG00000064270	2.22254	-1.61337	0.00157675	0.00283047
NGFR	protein_coding	ENSG00000064300	-0.970423	2.4848	2.06936e-14	8.15256e-14
CDON	protein_coding	ENSG00000064309	1.47253	3.3786	6.30585e-49	9.37587e-48
TAF2	protein_coding	ENSG00000064313	-0.505358	7.08618	2.04158e-14	8.0444e-14
HIPK2	protein_coding	ENSG00000064393	-0.434617	6.4452	7.67106e-09	2.17662e-08
TNPO3	protein_coding	ENSG00000064419	-0.606253	6.27924	5.59633e-19	2.76114e-18
RFXANK	protein_coding	ENSG00000064490	0.408514	4.07335	1.36786e-07	3.5623e-07
TMEM161A	protein_coding	ENSG00000064545	0.191416	2.8361	0.0776281	0.107659
LPAR2	protein_coding	ENSG00000064547	2.1715	1.77421	2.18906e-42	2.65899e-41
CTSA	protein_coding	ENSG00000064601	0.298765	6.63756	5.15324e-06	1.19032e-05
SUGP2	protein_coding	ENSG00000064607	0.351468	6.75329	5.25009e-08	1.40776e-07
SLC12A2	protein_coding	ENSG00000064651	-0.109741	6.34537	0.0990636	0.134098
SNX24	protein_coding	ENSG00000064652	0.559701	4.77643	9.17636e-14	3.47697e-13
EYA2	protein_coding	ENSG00000064655	2.80092	2.24425	5.04038e-107	3.44908e-105
CNN2	protein_coding	ENSG00000064666	-0.179428	7.13876	0.00566219	0.00946134
ABCA7	protein_coding	ENSG00000064687	2.34863	2.60537	4.61606e-71	1.30808e-69
SNCAIP	protein_coding	ENSG00000064692	0.0613858	-0.148473	0.883394	0.91915
DDX20	protein_coding	ENSG00000064703	-0.533365	6.04123	2.35496e-16	1.02445e-15
BTBD1	protein_coding	ENSG00000064726	-0.644698	6.56081	1.66998e-22	9.51392e-22
FAR2	protein_coding	ENSG00000064763	0.989633	1.96592	3.85246e-15	1.57545e-14
BCAS1	protein_coding	ENSG00000064787	0.25609	-1.55704	0.868573	0.906076
CHI3L2	protein_coding	ENSG00000064886	0.368619	-0.296026	0.0992658	0.134364
SBNO2	protein_coding	ENSG00000064932	-0.132657	5.33494	0.0721373	0.100729
PMS1	protein_coding	ENSG00000064933	0.814465	4.39927	1.49901e-25	9.68264e-25
HMG20B	protein_coding	ENSG00000064961	-0.522019	6.75406	7.86865e-16	3.33625e-15
CALCRL	protein_coding	ENSG00000064989	1.79937	-1.67416	9.6262e-08	2.53794e-07
TAF11	protein_coding	ENSG00000064995	-0.552036	5.82536	1.41367e-15	5.91987e-15
ANKS1A	protein_coding	ENSG00000064999	-0.201499	5.50795	0.00318161	0.0055066
AP3D1	protein_coding	ENSG00000065000	-0.489475	7.06266	2.52008e-14	9.87975e-14
ZNF76	protein_coding	ENSG00000065029	1.0049	4.13314	1.90931e-34	1.74998e-33
SLC9A3R2	protein_coding	ENSG00000065054	-0.24473	4.58715	0.000977665	0.00180176
NTHL1	protein_coding	ENSG00000065057	-0.545269	3.39968	4.05767e-09	1.17515e-08
UHRF1BP1	protein_coding	ENSG00000065060	1.7287	6.3344	1.97149e-133	2.33927e-131
GNAI3	protein_coding	ENSG00000065135	-0.634324	7.56447	3.20032e-22	1.80868e-21
IPO5	protein_coding	ENSG00000065150	-0.642901	7.6355	1.08529e-22	6.23454e-22
OAT	protein_coding	ENSG00000065154	0.229231	7.23202	0.000413927	0.000799027
WDR3	protein_coding	ENSG00000065183	-1.35148	7.28943	1.77242e-70	4.92981e-69
PKN2	protein_coding	ENSG00000065243	-0.068005	6.59637	0.305781	0.369784
WDR18	protein_coding	ENSG00000065268	-0.482326	5.20624	5.7381e-12	1.96998e-11
TRAM2	protein_coding	ENSG00000065308	0.578557	7.059	5.1485e-18	2.43782e-17
NTN1	protein_coding	ENSG00000065320	1.29781	5.88424	9.65395e-74	2.93234e-72
GLP2R	protein_coding	ENSG00000065325	1.77864	4.89999	1.38986e-115	1.1544e-113
MCM10	protein_coding	ENSG00000065328	0.00697291	6.48912	0.917827	0.948829
DGKA	protein_coding	ENSG00000065357	1.92507	4.35617	4.10998e-121	3.79299e-119
ERBB3	protein_coding	ENSG00000065361	1.43992	1.48606	1.67316e-25	1.07902e-24
ANKRD44	protein_coding	ENSG00000065413	2.17412	3.19453	2.1748e-104	1.41198e-102
KARS	protein_coding	ENSG00000065427	-0.9192	7.82523	4.29404e-46	5.95113e-45
ADAT1	protein_coding	ENSG00000065457	0.630439	4.99986	9.9004e-17	4.39497e-16
PDIA5	protein_coding	ENSG00000065485	-0.128628	5.16234	0.0614995	0.0870454
TBC1D22B	protein_coding	ENSG00000065491	0.00855137	5.33814	0.903978	0.936441
NDUFB4	protein_coding	ENSG00000065518	-0.41023	6.29479	1.29125e-08	3.60859e-08
SPEN	protein_coding	ENSG00000065526	-1.1391	6.97361	1.26589e-56	2.33652e-55
MYLK	protein_coding	ENSG00000065534	1.27876	5.90588	3.59857e-75	1.13158e-73
ZC3H15	protein_coding	ENSG00000065548	-1.24923	7.29482	3.94271e-64	9.22917e-63
MAP2K4	protein_coding	ENSG00000065559	-0.494243	5.43806	2.15381e-12	7.57355e-12
TMEM206	protein_coding	ENSG00000065600	0.152549	3.6057	0.0767877	0.106598
SNAP91	protein_coding	ENSG00000065609	2.79996	-0.109633	3.69056e-32	3.08126e-31
SLK	protein_coding	ENSG00000065613	-0.608726	6.83978	5.46633e-16	2.33453e-15
CYB5R4	protein_coding	ENSG00000065615	-1.01988	4.73142	4.40007e-42	5.26762e-41
COL17A1	protein_coding	ENSG00000065618	0.638407	4.55614	1.34431e-16	5.92721e-16
GSTO2	protein_coding	ENSG00000065621	0.345937	3.84644	2.51983e-05	5.47791e-05
SEC61A2	protein_coding	ENSG00000065665	0.0901628	4.45395	0.25671	0.316487
PRKCQ	protein_coding	ENSG00000065675	1.19862	3.39017	1.03182e-40	1.18013e-39
TLE2	protein_coding	ENSG00000065717	0.26325	3.59018	0.00365037	0.00626792
ASB1	protein_coding	ENSG00000065802	-0.511257	6.21779	2.64082e-14	1.03312e-13
FAM107B	protein_coding	ENSG00000065809	-0.263213	6.03693	0.000148891	0.000300208
ME1	protein_coding	ENSG00000065833	0.18013	4.63377	0.0140028	0.0220982
TBC1D1	protein_coding	ENSG00000065882	0.154402	7.02395	0.0192343	0.0297442
CDK13	protein_coding	ENSG00000065883	-0.897984	6.83513	1.4227e-43	1.79417e-42
MTHFD2	protein_coding	ENSG00000065911	0.711916	8.1338	5.56916e-24	3.37895e-23
SLC9A7	protein_coding	ENSG00000065923	-0.322581	5.46305	2.99435e-06	7.04483e-06
FOXJ2	protein_coding	ENSG00000065970	0.217436	5.97671	0.000858894	0.00159606
YBX1	protein_coding	ENSG00000065978	-0.797296	11.0175	1.3802e-30	1.0836e-29
PDE4A	protein_coding	ENSG00000065989	-0.209493	4.77464	0.00427984	0.00728105
PPP2R5A	protein_coding	ENSG00000066027	-0.670391	4.939	9.41817e-21	4.99461e-20
CTNNA2	protein_coding	ENSG00000066032	-0.633828	-0.30312	0.00423739	0.00721569
ELAVL1	protein_coding	ENSG00000066044	-0.459039	6.52719	7.55924e-13	2.72492e-12
TIE1	protein_coding	ENSG00000066056	0.719257	1.89077	0.000225763	0.000447421
DIP2B	protein_coding	ENSG00000066084	-0.395306	6.13165	3.78372e-08	1.02414e-07
SMARCD1	protein_coding	ENSG00000066117	-0.54451	6.50205	1.65197e-17	7.62278e-17
KDM4A	protein_coding	ENSG00000066135	0.062666	5.25228	0.364458	0.431259
NFYC	protein_coding	ENSG00000066136	-0.587914	6.14203	6.54562e-19	3.22027e-18
ZMYND12	protein_coding	ENSG00000066185	0.810314	-3.35179	0.246978	0.305859
SLC9A3	protein_coding	ENSG00000066230	0.931883	-1.95216	0.0645252	0.0909964
NGEF	protein_coding	ENSG00000066248	0.959858	1.66103	1.17529e-11	3.96875e-11
ASPM	protein_coding	ENSG00000066279	1.17372	7.35943	7.16754e-55	1.25926e-53
ELOVL1	protein_coding	ENSG00000066322	-0.0630463	7.01871	0.330061	0.395203
SPI1	protein_coding	ENSG00000066336	1.06311	-3.16117	0.0891428	0.121798
ZNRD1	protein_coding	ENSG00000066379	-0.709044	3.0329	7.15313e-11	2.31365e-10
MPPED2	protein_coding	ENSG00000066382	2.24808	0.638517	1.44986e-29	1.09786e-28
ZBTB11	protein_coding	ENSG00000066422	-1.18194	6.04091	5.79993e-71	1.63778e-69
ATXN3	protein_coding	ENSG00000066427	-0.636117	4.12405	1.43885e-13	5.40428e-13
GOLGA5	protein_coding	ENSG00000066455	-0.35302	5.18898	1.91798e-06	4.58636e-06
FGFR2	protein_coding	ENSG00000066468	0.326969	4.56586	8.0297e-06	1.82274e-05
LRRC40	protein_coding	ENSG00000066557	-0.168224	5.16004	0.0179215	0.0278519
ISOC1	protein_coding	ENSG00000066583	-0.075623	5.36042	0.275521	0.336997
EML1	protein_coding	ENSG00000066629	-0.0221977	3.00091	0.831489	0.875098
TRMT11	protein_coding	ENSG00000066651	-0.538175	4.0278	3.44688e-11	1.13391e-10
THUMPD1	protein_coding	ENSG00000066654	-0.826759	5.85261	2.07492e-33	1.82537e-32
MSANTD3	protein_coding	ENSG00000066697	-0.82187	6.31894	4.28791e-32	3.5701e-31
KIF26A	protein_coding	ENSG00000066735	0.82531	3.85456	3.78171e-19	1.87853e-18
ATG2B	protein_coding	ENSG00000066739	0.644459	3.93624	1.37187e-14	5.46366e-14
ARFGEF1	protein_coding	ENSG00000066777	-0.436164	6.46984	4.23644e-10	1.30456e-09
ZFAT	protein_coding	ENSG00000066827	-1.42257	3.77558	5.61769e-61	1.20385e-59
MTFR1	protein_coding	ENSG00000066855	-0.359784	5.03139	3.44646e-07	8.72188e-07
STAG3	protein_coding	ENSG00000066923	-1.37339	-1.07612	5.21956e-05	0.000109994
FECH	protein_coding	ENSG00000066926	0.545586	4.41678	3.73757e-13	1.37152e-12
MYO9A	protein_coding	ENSG00000066933	0.982897	5.36158	2.36445e-40	2.67885e-39
PFKP	protein_coding	ENSG00000067057	-0.036261	6.99762	0.585447	0.650296
IDI1	protein_coding	ENSG00000067064	0.722253	5.52613	1.54109e-23	9.16097e-23
SP100	protein_coding	ENSG00000067066	-0.602247	5.26538	4.16574e-17	1.88538e-16
KLF6	protein_coding	ENSG00000067082	-1.48285	6.50212	4.16267e-66	1.02943e-64
PLPP1	protein_coding	ENSG00000067113	1.15379	3.54644	3.47572e-39	3.761e-38
NEO1	protein_coding	ENSG00000067141	0.604642	6.08501	4.57759e-20	2.35952e-19
TRAM1	protein_coding	ENSG00000067167	-0.184277	7.88786	0.00665685	0.0110141
PHKA1	protein_coding	ENSG00000067177	1.21494	4.59855	1.49989e-52	2.46271e-51
TNFRSF1A	protein_coding	ENSG00000067182	-0.228262	6.74331	0.000436652	0.0008402
CACNB1	protein_coding	ENSG00000067191	0.486642	4.43506	2.76826e-09	8.11279e-09
EVI5	protein_coding	ENSG00000067208	-0.707769	4.43617	4.72478e-20	2.43487e-19
STOML1	protein_coding	ENSG00000067221	0.871315	2.52894	2.09123e-13	7.78781e-13
PKM	protein_coding	ENSG00000067225	-0.94306	11.4311	9.68546e-47	1.36429e-45
DHX29	protein_coding	ENSG00000067248	-0.639261	6.15665	4.03956e-20	2.08576e-19
DNTTIP2	protein_coding	ENSG00000067334	-1.36931	6.93896	2.32575e-85	9.88012e-84
METTL22	protein_coding	ENSG00000067365	0.303145	4.59685	4.08092e-05	8.70426e-05
TP53BP1	protein_coding	ENSG00000067369	-0.0396856	6.44232	0.54823	0.61494
TRO	protein_coding	ENSG00000067445	0.728684	6.1199	2.99589e-28	2.15473e-27
RRP15	protein_coding	ENSG00000067533	-1.76562	5.34519	2.71719e-122	2.56662e-120
RHOA	protein_coding	ENSG00000067560	-0.642723	8.68296	1.43404e-23	8.53094e-23
DHX8	protein_coding	ENSG00000067596	-0.613588	6.12699	1.61199e-18	7.81246e-18
PMS2P4	transcribed_unprocessed_pseudogene	ENSG00000067601	0.62112	1.43774	4.88507e-06	1.13054e-05
PRKCZ	protein_coding	ENSG00000067606	-0.0763102	4.11945	0.342923	0.408405
IARS2	protein_coding	ENSG00000067704	-0.290706	7.15829	1.11298e-05	2.49867e-05
SYT1	protein_coding	ENSG00000067715	1.77867	2.27116	6.55349e-41	7.54199e-40
NAV3	protein_coding	ENSG00000067798	-0.849686	5.75667	2.24717e-33	1.97402e-32
IDH3G	protein_coding	ENSG00000067829	-0.388305	4.82984	8.49979e-08	2.24958e-07
ROGDI	protein_coding	ENSG00000067836	0.840782	1.77459	4.19106e-08	1.13059e-07
PDZD4	protein_coding	ENSG00000067840	0.778489	4.5216	7.79195e-25	4.89527e-24
ATP2B3	protein_coding	ENSG00000067842	2.08806	0.207001	4.69469e-21	2.52356e-20
ROCK1	protein_coding	ENSG00000067900	-0.71528	7.03028	1.2047e-25	7.81095e-25
CBFB	protein_coding	ENSG00000067955	-0.749592	6.75596	7.04387e-29	5.20926e-28
PDK3	protein_coding	ENSG00000067992	0.57555	2.3012	2.30009e-07	5.8901e-07
HYAL2	protein_coding	ENSG00000068001	0.229441	5.08347	0.000961634	0.00177385
HDAC4	protein_coding	ENSG00000068024	0.901256	0.714639	8.80836e-06	1.99311e-05
RASSF1	protein_coding	ENSG00000068028	0.613116	4.36483	1.02518e-14	4.106e-14
FGFR3	protein_coding	ENSG00000068078	0.725249	2.52558	3.84049e-12	1.33121e-11
IFI35	protein_coding	ENSG00000068079	-1.39482	-3.38747	0.0501343	0.0721592
HEATR6	protein_coding	ENSG00000068097	-0.200187	5.98072	0.00223241	0.00393647
COASY	protein_coding	ENSG00000068120	-0.383946	6.34354	1.9814e-09	5.86172e-09
PLEKHH3	protein_coding	ENSG00000068137	0.676846	3.93321	8.57844e-18	4.01221e-17
MEF2A	protein_coding	ENSG00000068305	-0.320549	5.82841	2.78382e-06	6.56553e-06
OTUD5	protein_coding	ENSG00000068308	-0.498533	6.13362	6.23627e-14	2.38775e-13
TFE3	protein_coding	ENSG00000068323	-0.462271	7.1975	6.52207e-13	2.35952e-12
TBC1D25	protein_coding	ENSG00000068354	0.359897	4.42444	1.97321e-06	4.71048e-06
ACSL4	protein_coding	ENSG00000068366	-0.337876	6.33185	1.27321e-06	3.08839e-06
INPP5A	protein_coding	ENSG00000068383	-0.27611	4.52318	0.000203864	0.000406059
GPKOW	protein_coding	ENSG00000068394	-0.470295	5.22449	3.53134e-11	1.16043e-10
GRIPAP1	protein_coding	ENSG00000068400	0.471841	6.02152	9.72871e-12	3.29725e-11
FTSJ1	protein_coding	ENSG00000068438	-0.480789	6.93421	4.68631e-14	1.80405e-13
PRR11	protein_coding	ENSG00000068489	-0.690774	8.34227	4.17722e-24	2.54984e-23
REEP1	protein_coding	ENSG00000068615	3.17438	2.41964	7.63248e-145	1.121e-142
ATP11A	protein_coding	ENSG00000068650	0.400736	7.20575	8.93307e-10	2.69942e-09
POLR1A	protein_coding	ENSG00000068654	-0.712589	7.35845	1.20708e-24	7.53239e-24
LAPTM4A	protein_coding	ENSG00000068697	-0.447315	7.43607	4.07171e-12	1.40913e-11
TTC7A	protein_coding	ENSG00000068724	-0.110685	4.50166	0.156287	0.202773
IP6K2	protein_coding	ENSG00000068745	0.0695665	5.74931	0.296443	0.35972
SRBD1	protein_coding	ENSG00000068784	0.0486318	5.06206	0.502202	0.570457
KIF2A	protein_coding	ENSG00000068796	-0.316742	6.59137	1.54643e-06	3.72414e-06
RASGRP2	protein_coding	ENSG00000068831	1.14804	0.345001	8.65775e-08	2.29038e-07
PSME4	protein_coding	ENSG00000068878	-1.02189	7.59175	9.78003e-56	1.76063e-54
IFT80	protein_coding	ENSG00000068885	0.612861	3.29771	2.8206e-11	9.33112e-11
SIRT2	protein_coding	ENSG00000068903	0.575346	3.94117	4.44158e-13	1.62467e-12
ERLEC1	protein_coding	ENSG00000068912	0.0391706	6.40409	0.549671	0.616298
PPP2R5B	protein_coding	ENSG00000068971	1.22737	3.05868	9.23413e-39	9.87228e-38
PYGM	protein_coding	ENSG00000068976	-0.79134	0.470478	3.71014e-05	7.94648e-05
PAGE1	protein_coding	ENSG00000068985	0.279983	-1.2778	0.415036	0.483109
PITX1	protein_coding	ENSG00000069011	-0.661153	4.39459	7.09131e-19	3.48518e-18
TRPC7	protein_coding	ENSG00000069018	2.28191	-3.5875	1	1
MAST4	protein_coding	ENSG00000069020	-0.0939287	5.1699	0.179657	0.229862
ADGRF5	protein_coding	ENSG00000069122	0.613159	2.35786	3.5642e-06	8.33666e-06
SDK2	protein_coding	ENSG00000069188	1.64845	4.96964	1.11529e-91	5.60835e-90
NUP133	protein_coding	ENSG00000069248	-0.428091	5.93682	2.1273e-10	6.6867e-10
NUCKS1	protein_coding	ENSG00000069275	-0.581838	8.83046	3.00976e-17	1.36966e-16
VPS35	protein_coding	ENSG00000069329	-0.269058	6.80734	6.09486e-05	0.000127481
DNAJA2	protein_coding	ENSG00000069345	-0.802966	6.7913	1.79e-32	1.51709e-31
BCL3	protein_coding	ENSG00000069399	-1.69194	3.74845	3.33245e-76	1.07025e-74
KCNAB2	protein_coding	ENSG00000069424	0.76302	4.75048	4.81654e-24	2.93488e-23
ABCC9	protein_coding	ENSG00000069431	0.212027	2.35033	0.0533085	0.0763357
GAL	protein_coding	ENSG00000069482	2.61245	-2.81931	0.00132453	0.00239825
CLEC2D	protein_coding	ENSG00000069493	0.758748	1.92985	6.55478e-08	1.74748e-07
FUNDC1	protein_coding	ENSG00000069509	-0.669935	4.37096	4.09143e-18	1.94686e-17
MAOB	protein_coding	ENSG00000069535	0.0794702	3.44352	0.492134	0.560282
RORA	protein_coding	ENSG00000069667	0.571236	3.70418	7.22763e-12	2.46834e-11
DRD4	protein_coding	ENSG00000069696	0.394892	-0.763836	0.262676	0.323073
TGFBR3	protein_coding	ENSG00000069702	0.310759	2.4068	0.0016144	0.00289546
ATP1B3	protein_coding	ENSG00000069849	-0.262215	6.64053	6.59645e-05	0.000137637
NEDD4	protein_coding	ENSG00000069869	-0.295356	6.33408	8.32505e-06	1.8873e-05
PIGB	protein_coding	ENSG00000069943	0.200914	3.03046	0.0422198	0.0616071
MAPK6	protein_coding	ENSG00000069956	-0.470447	7.11553	4.13536e-12	1.43033e-11
GNB5	protein_coding	ENSG00000069966	0.0813213	4.95146	0.238178	0.295996
RAB27A	protein_coding	ENSG00000069974	0.826279	4.27425	3.95992e-25	2.51404e-24
HDHD5	protein_coding	ENSG00000069998	-0.486854	5.19278	1.00364e-11	3.39866e-11
UFD1	protein_coding	ENSG00000070010	-0.207686	7.44736	0.00113059	0.00206621
LRP6	protein_coding	ENSG00000070018	0.271355	7.38905	7.9884e-05	0.000165434
PHRF1	protein_coding	ENSG00000070047	-1.0344	6.25652	1.65575e-56	3.04675e-55
ELP1	protein_coding	ENSG00000070061	-0.193261	5.72174	0.00357183	0.00614095
NUCB2	protein_coding	ENSG00000070081	0.145588	7.04863	0.0370211	0.0545498
PFN2	protein_coding	ENSG00000070087	-0.0306333	7.00872	0.6358	0.69805
PTPN3	protein_coding	ENSG00000070159	0.858856	4.87913	3.50342e-32	2.92705e-31
SPTB	protein_coding	ENSG00000070182	1.13572	5.78729	3.01356e-61	6.50427e-60
DAPP1	protein_coding	ENSG00000070190	1.96187	-1.09	8.06635e-10	2.44364e-09
SLC44A1	protein_coding	ENSG00000070214	0.41791	5.63438	1.2188e-09	3.64959e-09
TMEM260	protein_coding	ENSG00000070269	0.148472	4.22919	0.0563888	0.0803929
SMG6	protein_coding	ENSG00000070366	-0.170507	5.68464	0.0110684	0.0177357
EXOC5	protein_coding	ENSG00000070367	-0.316638	7.44809	2.75634e-06	6.50519e-06
CLTCL1	protein_coding	ENSG00000070371	1.61918	5.09175	7.83429e-118	6.7636e-116
FSTL3	protein_coding	ENSG00000070404	0.603846	7.26524	1.83804e-20	9.63084e-20
DGCR2	protein_coding	ENSG00000070413	1.26936	5.7944	9.51106e-65	2.26825e-63
RNF126	protein_coding	ENSG00000070423	-0.326148	4.94381	4.65716e-06	1.07946e-05
MNT	protein_coding	ENSG00000070444	-1.11553	4.53952	5.34759e-50	8.16788e-49
ZXDC	protein_coding	ENSG00000070476	0.924881	4.82733	2.1361e-37	2.16641e-36
JMJD6	protein_coding	ENSG00000070495	-0.695846	5.74941	1.07371e-25	6.97663e-25
POLB	protein_coding	ENSG00000070501	-0.283491	4.18009	0.000423388	0.000816244
WIPI1	protein_coding	ENSG00000070540	1.20907	4.00913	4.28509e-50	6.57002e-49
FRMPD1	protein_coding	ENSG00000070601	1.877	-1.07561	1.36712e-08	3.81398e-08
GBA2	protein_coding	ENSG00000070610	0.399336	6.20459	1.62647e-09	4.83486e-09
NDST1	protein_coding	ENSG00000070614	-0.079761	8.42045	0.227501	0.284233
ASNS	protein_coding	ENSG00000070669	1.72203	1.79387	8.30854e-44	1.05441e-42
AP3M2	protein_coding	ENSG00000070718	0.24547	5.2696	0.00033176	0.000646216
CNGB1	protein_coding	ENSG00000070729	1.1454	-1.59764	0.0213902	0.0328015
CHAT	protein_coding	ENSG00000070748	1.85071	-0.281414	5.75284e-12	1.97476e-11
PABPC1	protein_coding	ENSG00000070756	-0.956091	10.7651	2.20874e-44	2.86185e-43
TESK2	protein_coding	ENSG00000070759	-0.216375	2.40284	0.0593125	0.0841824
CFAP20	protein_coding	ENSG00000070761	-0.630439	5.91088	6.48428e-19	3.19074e-18
CSNK2A2	protein_coding	ENSG00000070770	-0.725094	7.05527	1.71446e-28	1.24574e-27
PTPN21	protein_coding	ENSG00000070778	0.480835	6.08665	5.56522e-13	2.02186e-12
EIF2B3	protein_coding	ENSG00000070785	-0.640408	5.22117	9.61975e-19	4.70097e-18
CAMK2A	protein_coding	ENSG00000070808	1.84376	-0.182049	1.27618e-06	3.09488e-06
TCOF1	protein_coding	ENSG00000070814	-0.630671	8.23385	3.09901e-22	1.75225e-21
CDC42	protein_coding	ENSG00000070831	-1.13389	-0.214006	5.21176e-07	1.29981e-06
OSBPL3	protein_coding	ENSG00000070882	0.85895	6.33352	1.89136e-38	1.99638e-37
EPHA8	protein_coding	ENSG00000070886	0.129627	-0.137272	0.578741	0.643856
SLC12A3	protein_coding	ENSG00000070915	1.14812	-2.42968	0.12425	0.164911
RAD18	protein_coding	ENSG00000070950	-0.373717	5.27016	6.70754e-08	1.78761e-07
ATP2B1	protein_coding	ENSG00000070961	-0.812199	7.05459	2.65525e-35	2.50321e-34
NCK2	protein_coding	ENSG00000071051	-0.28261	6.48898	8.49985e-06	1.92566e-05
MAP4K4	protein_coding	ENSG00000071054	-0.620315	8.81746	2.14265e-19	1.07678e-18
MGAT4A	protein_coding	ENSG00000071073	2.1454	2.62663	1.8728e-83	7.45622e-82
RPL31	protein_coding	ENSG00000071082	-0.305937	7.66176	6.1645e-05	0.000128893
WDR1	protein_coding	ENSG00000071127	-0.805625	8.2601	1.81187e-31	1.47242e-30
SNX13	protein_coding	ENSG00000071189	-0.236801	5.94514	0.00051134	0.000976582
MS4A12	protein_coding	ENSG00000071203	1.77621	-3.82525	0.0229251	0.0350113
ARHGAP10	protein_coding	ENSG00000071205	-0.000908575	4.1905	0.994512	1
RPS6KA2	protein_coding	ENSG00000071242	1.95585	3.1102	3.95045e-84	1.60734e-82
ING3	protein_coding	ENSG00000071243	-0.802192	3.47417	7.21462e-19	3.54433e-18
VASH1	protein_coding	ENSG00000071246	1.137	4.34573	5.10961e-46	7.06922e-45
LMCD1	protein_coding	ENSG00000071282	1.50961	4.96962	2.27163e-84	9.28977e-83
BUD23	protein_coding	ENSG00000071462	-0.44561	6.84801	4.62626e-12	1.596e-11
SEL1L	protein_coding	ENSG00000071537	-0.333047	8.06953	4.7178e-07	1.18126e-06
TRIP13	protein_coding	ENSG00000071539	-0.125821	6.5238	0.0552652	0.0789362
ATP6AP1	protein_coding	ENSG00000071553	0.307102	6.75375	2.6329e-06	6.22361e-06
TCF3	protein_coding	ENSG00000071564	-0.788323	7.32967	1.44821e-34	1.33396e-33
TRIB2	protein_coding	ENSG00000071575	-1.94253	6.09436	1.13392e-157	2.11727e-155
DAZAP1	protein_coding	ENSG00000071626	-0.79065	7.62118	7.11261e-34	6.35701e-33
MBD3	protein_coding	ENSG00000071655	-0.262458	5.59111	0.000155772	0.000313613
HLTF	protein_coding	ENSG00000071794	0.227778	5.95875	0.000906826	0.00167802
FAM50A	protein_coding	ENSG00000071859	0.199016	6.26956	0.00212999	0.00376663
FAM3A	protein_coding	ENSG00000071889	0.86924	4.27503	3.69862e-29	2.75561e-28
CPSF1	protein_coding	ENSG00000071894	-0.020924	7.68982	0.747164	0.800932
MYO3B	protein_coding	ENSG00000071909	1.26233	-2.39124	0.0110204	0.0176671
CYBRD1	protein_coding	ENSG00000071967	0.910712	5.77344	2.51849e-41	2.93767e-40
CDH19	protein_coding	ENSG00000071991	-6.97251	-2.77018	1.8657e-08	5.15061e-08
PDCD2	protein_coding	ENSG00000071994	-0.516608	6.42684	7.65988e-16	3.24945e-15
SLC6A15	protein_coding	ENSG00000072041	0.159644	4.23959	0.0441557	0.0642102
RDH11	protein_coding	ENSG00000072042	0.519461	7.24582	1.63262e-14	6.47006e-14
PRKACA	protein_coding	ENSG00000072062	-0.115441	5.96674	0.0825368	0.11361
ADGRL1	protein_coding	ENSG00000072071	0.16593	5.69764	0.0229685	0.0350753
ACTN1	protein_coding	ENSG00000072110	-0.749362	9.84087	8.83645e-31	6.98994e-30
ZFYVE26	protein_coding	ENSG00000072121	0.0297529	5.83853	0.667329	0.728185
RPS6KA6	protein_coding	ENSG00000072133	0.322371	4.01392	0.000118738	0.000242008
EPN2	protein_coding	ENSG00000072134	-0.130882	5.83358	0.0641593	0.0905174
PTPN18	protein_coding	ENSG00000072135	0.718122	5.81495	5.11704e-27	3.51152e-26
LIMS2	protein_coding	ENSG00000072163	1.64044	3.21231	2.88914e-58	5.64859e-57
ASIC4	protein_coding	ENSG00000072182	0.816218	-1.65359	0.0501712	0.0722081
SPEG	protein_coding	ENSG00000072195	1.50584	6.62307	6.06387e-98	3.45297e-96
LNX1	protein_coding	ENSG00000072201	1.26095	2.16078	5.34711e-29	3.96783e-28
ALDH3A2	protein_coding	ENSG00000072210	-0.236	5.33123	0.000552422	0.00105071
TFRC	protein_coding	ENSG00000072274	-1.06081	9.56345	3.22171e-54	5.59088e-53
SREBF1	protein_coding	ENSG00000072310	0.451852	6.56329	5.79339e-10	1.76998e-09
AFF4	protein_coding	ENSG00000072364	-0.93384	8.29025	2.89413e-43	3.61571e-42
UBE2D1	protein_coding	ENSG00000072401	-0.608795	5.35088	2.41943e-18	1.1646e-17
MPP5	protein_coding	ENSG00000072415	-0.0716426	7.39065	0.275644	0.33713
RHOBTB1	protein_coding	ENSG00000072422	1.01079	5.15531	8.67769e-43	1.0708e-41
SMC1A	protein_coding	ENSG00000072501	0.190819	8.21605	0.00530026	0.00889792
HSD17B10	protein_coding	ENSG00000072506	-0.418656	6.00841	3.29792e-10	1.02209e-09
MARK2	protein_coding	ENSG00000072518	-0.699275	5.51388	2.24102e-23	1.3214e-22
HMMR	protein_coding	ENSG00000072571	-0.301742	6.75749	2.96464e-05	6.40327e-05
CHFR	protein_coding	ENSG00000072609	-0.100875	3.4529	0.256264	0.315962
TRHDE	protein_coding	ENSG00000072657	0.197669	3.47587	0.0334456	0.0496214
P4HA2	protein_coding	ENSG00000072682	0.878292	6.55192	5.61497e-41	6.48359e-40
NFATC3	protein_coding	ENSG00000072736	-0.406461	5.26694	1.093e-08	3.06843e-08
TRNT1	protein_coding	ENSG00000072756	-0.743935	5.4049	9.50643e-26	6.19371e-25
ACADVL	protein_coding	ENSG00000072778	-0.100977	7.671	0.126294	0.167348
STK10	protein_coding	ENSG00000072786	-0.84371	6.33677	2.88534e-37	2.91279e-36
FBXW11	protein_coding	ENSG00000072803	-0.260596	6.24856	9.29154e-05	0.000191385
ACAP1	protein_coding	ENSG00000072818	0.560343	1.16483	0.000455072	0.00087397
CRMP1	protein_coding	ENSG00000072832	-0.271137	6.04612	4.76404e-05	0.000100872
EVC	protein_coding	ENSG00000072840	0.38555	4.26251	2.85667e-05	6.18005e-05
DERL2	protein_coding	ENSG00000072849	-0.270215	5.1638	9.74771e-05	0.000200284
SIDT1	protein_coding	ENSG00000072858	-0.355225	-2.6534	0.50846	0.576153
NDE1	protein_coding	ENSG00000072864	-0.383505	5.9372	1.86391e-08	5.14627e-08
MRVI1	protein_coding	ENSG00000072952	0.367376	-3.74693	0.78609	0.835631
TMEM38A	protein_coding	ENSG00000072954	0.796674	3.17462	1.17932e-18	5.73748e-18
AP1M1	protein_coding	ENSG00000072958	0.444934	5.51213	1.696e-10	5.36251e-10
PVR	protein_coding	ENSG00000073008	0.0867163	7.24814	0.179506	0.22973
XRCC1	protein_coding	ENSG00000073050	-0.0047664	5.24428	0.947077	0.975132
SCARB1	protein_coding	ENSG00000073060	-0.09368	6.92857	0.149687	0.194966
MCM2	protein_coding	ENSG00000073111	-0.55556	7.17538	4.40641e-18	2.09302e-17
MOV10L1	protein_coding	ENSG00000073146	3.10266	1.55579	4.7304e-84	1.92143e-82
PANX2	protein_coding	ENSG00000073150	0.121942	3.16378	0.202232	0.255731
SELENOO	protein_coding	ENSG00000073169	0.591129	4.62914	1.17853e-11	3.97859e-11
TP63	protein_coding	ENSG00000073282	1.50508	-1.43787	0.00523047	0.00878987
ALPK1	protein_coding	ENSG00000073331	1.12542	3.69469	1.85075e-34	1.69825e-33
LLGL2	protein_coding	ENSG00000073350	2.25046	0.171774	2.06343e-27	1.4373e-26
PDE8A	protein_coding	ENSG00000073417	-0.771348	5.73952	1.88345e-28	1.36606e-27
CLCN4	protein_coding	ENSG00000073464	-0.0286622	4.2124	0.724939	0.781105
NLE1	protein_coding	ENSG00000073536	-0.579875	5.22198	2.66675e-17	1.21794e-16
SDHA	protein_coding	ENSG00000073578	0.508919	6.74504	2.2578e-15	9.36034e-15
SMARCE1	protein_coding	ENSG00000073584	0.0986436	2.65585	0.377441	0.444265
GSDMB	protein_coding	ENSG00000073605	0.899489	4.20068	8.40419e-22	4.6611e-21
KDM5A	protein_coding	ENSG00000073614	-0.699335	6.23366	1.51293e-23	8.99801e-23
ADAM11	protein_coding	ENSG00000073670	0.153832	2.53186	0.191556	0.243534
PPP2R3A	protein_coding	ENSG00000073711	-0.626758	5.6064	7.31202e-19	3.58925e-18
FERMT2	protein_coding	ENSG00000073712	-0.437537	7.42818	1.90882e-10	6.01567e-10
ABCB11	protein_coding	ENSG00000073734	0.2063	-3.61665	1	1
DHRS9	protein_coding	ENSG00000073737	-1.09457	-2.678	0.0172631	0.0268875
CD5L	protein_coding	ENSG00000073754	4.59596	-3.97165	0.0358528	0.0529645
PTGS2	protein_coding	ENSG00000073756	-0.0508007	2.00636	0.705271	0.763019
IGF2BP2	protein_coding	ENSG00000073792	-0.791091	7.28296	1.89097e-33	1.66598e-32
MAP3K13	protein_coding	ENSG00000073803	-0.578921	4.67388	4.21487e-15	1.72103e-14
ST6GAL1	protein_coding	ENSG00000073849	0.676572	2.6642	2.19167e-10	6.88544e-10
TBX21	protein_coding	ENSG00000073861	-0.334514	-3.19522	0.859	0.898308
VDAC1P1	processed_pseudogene	ENSG00000073905	-1.09558	-1.37942	0.00139759	0.00252294
FRY	protein_coding	ENSG00000073910	2.16085	1.56187	3.73432e-39	4.03901e-38
PICALM	protein_coding	ENSG00000073921	-0.512494	7.6021	8.76513e-14	3.32638e-13
NSF	protein_coding	ENSG00000073969	0.235508	5.28465	0.000670184	0.00126224
GLI2	protein_coding	ENSG00000074047	0.914614	6.16701	2.39052e-34	2.18107e-33
CLASP1	protein_coding	ENSG00000074054	-0.157504	6.7912	0.0168377	0.0262606
MRPS34	protein_coding	ENSG00000074071	-0.671797	7.07526	6.2094e-20	3.18632e-19
NOTCH3	protein_coding	ENSG00000074181	1.58707	6.00051	6.5388e-94	3.48451e-92
CLNS1A	protein_coding	ENSG00000074201	-0.642322	7.08977	2.69142e-21	1.45976e-20
PPP2R2C	protein_coding	ENSG00000074211	-0.354638	6.21868	8.236e-08	2.18144e-07
TEAD2	protein_coding	ENSG00000074219	0.57305	4.80042	5.53728e-15	2.24653e-14
EED	protein_coding	ENSG00000074266	-0.182654	4.75671	0.00976743	0.0157644
CDHR2	protein_coding	ENSG00000074276	2.22536	-3.80686	0.0303377	0.0453484
SNCB	protein_coding	ENSG00000074317	0.296766	1.15762	0.0629309	0.0888938
TSG101	protein_coding	ENSG00000074319	-0.206102	5.26194	0.00257208	0.00450343
NCBP3	protein_coding	ENSG00000074356	-0.0740903	5.85339	0.271859	0.332974
ATP2A3	protein_coding	ENSG00000074370	2.5127	1.64549	2.51203e-59	5.07185e-58
CA12	protein_coding	ENSG00000074410	0.488816	4.85019	2.78293e-11	9.20774e-11
MGLL	protein_coding	ENSG00000074416	0.0537197	5.78582	0.447261	0.515636
NTN4	protein_coding	ENSG00000074527	1.20507	4.41292	1.05925e-55	1.90404e-54
BCS1L	protein_coding	ENSG00000074582	-0.36782	4.701	4.35086e-07	1.09154e-06
NUAK1	protein_coding	ENSG00000074590	0.537222	6.16063	1.03872e-15	4.37941e-15
DPP8	protein_coding	ENSG00000074603	-0.46699	5.71291	1.85963e-12	6.5525e-12
SLC24A1	protein_coding	ENSG00000074621	0.104209	4.32729	0.204338	0.258068
ZNF532	protein_coding	ENSG00000074657	-0.834885	6.98409	8.17077e-36	7.87868e-35
SCARF1	protein_coding	ENSG00000074660	-0.816002	0.49931	0.000246039	0.000486045
LMAN1	protein_coding	ENSG00000074695	-0.595152	8.15516	2.0758e-20	1.08483e-19
HACD3	protein_coding	ENSG00000074696	0.137715	7.95513	0.0333892	0.0495561
IPCEF1	protein_coding	ENSG00000074706	2.27619	-3.05016	0.000695995	0.00130778
ZZEF1	protein_coding	ENSG00000074755	-0.214162	5.23897	0.00276414	0.00481973
ENO1	protein_coding	ENSG00000074800	-0.860599	11.3344	1.77092e-38	1.87335e-37
MYDGF	protein_coding	ENSG00000074842	-0.0677011	6.58825	0.309755	0.373895
ANO8	protein_coding	ENSG00000074855	1.93993	3.12921	1.36356e-76	4.40859e-75
TUBE1	protein_coding	ENSG00000074935	0.0995685	4.41504	0.232819	0.289964
ARHGEF10L	protein_coding	ENSG00000074964	1.4608	3.60685	2.85075e-59	5.7413e-58
TXK	protein_coding	ENSG00000074966	2.1237	-1.98564	3.57835e-07	9.04331e-07
WSCD2	protein_coding	ENSG00000075035	1.30588	-3.07242	0.137412	0.180648
KCNQ2	protein_coding	ENSG00000075043	0.513048	-1.30589	0.152403	0.198129
TACR2	protein_coding	ENSG00000075073	1.34148	-3.19683	0.0828734	0.114034
ACTR6	protein_coding	ENSG00000075089	-0.420281	3.69484	2.30322e-06	5.47171e-06
TIPIN	protein_coding	ENSG00000075131	-1.24823	4.74749	2.93879e-59	5.91368e-58
SRI	protein_coding	ENSG00000075142	-0.236511	5.78106	0.000898167	0.0016634
EIF4G3	protein_coding	ENSG00000075151	0.153077	5.88456	0.0241998	0.0367993
NUP37	protein_coding	ENSG00000075188	-0.725191	4.68059	3.53923e-22	1.99367e-21
SEMA3A	protein_coding	ENSG00000075213	0.664877	3.53158	1.54543e-10	4.89477e-10
GTSE1	protein_coding	ENSG00000075218	0.298259	7.54686	4.8765e-06	1.12866e-05
SEMA3C	protein_coding	ENSG00000075223	-0.186396	6.63328	0.00596765	0.00994416
TTC38	protein_coding	ENSG00000075234	-0.462804	4.17997	1.81289e-09	5.37574e-09
ACAT1	protein_coding	ENSG00000075239	-0.0680467	5.67552	0.357659	0.424047
GRAMD4	protein_coding	ENSG00000075240	0.555856	3.82785	6.04864e-10	1.84516e-09
CELSR1	protein_coding	ENSG00000075275	2.27999	-0.741246	4.43161e-15	1.80647e-14
ZNF638	protein_coding	ENSG00000075292	0.384178	7.49714	1.43187e-08	3.98862e-08
SLC25A40	protein_coding	ENSG00000075303	1.00585	4.20759	7.15926e-33	6.16757e-32
TIMM21	protein_coding	ENSG00000075336	-0.752731	5.817	4.35124e-28	3.11096e-27
ADD2	protein_coding	ENSG00000075340	0.29579	3.58706	0.00364279	0.0062558
FGF4	protein_coding	ENSG00000075388	0.600394	-2.31672	0.270889	0.33187
RASAL2	protein_coding	ENSG00000075391	0.740018	6.19099	8.51082e-27	5.7828e-26
VPS9D1	protein_coding	ENSG00000075399	1.81279	4.25575	8.34733e-49	1.23654e-47
ZNF37A	protein_coding	ENSG00000075407	-0.483563	5.78593	2.25701e-12	7.92487e-12
MARK3	protein_coding	ENSG00000075413	-0.769367	5.91745	1.35072e-31	1.10287e-30
SLC25A3	protein_coding	ENSG00000075415	-0.391709	7.86206	1.14771e-09	3.44356e-09
FNDC3B	protein_coding	ENSG00000075420	-0.583819	6.97488	9.90705e-17	4.3963e-16
FOSL2	protein_coding	ENSG00000075426	-1.27573	8.21848	1.69194e-81	6.31842e-80
CACNG5	protein_coding	ENSG00000075429	-1.87366	-2.96591	0.00151341	0.00272223
FRYL	protein_coding	ENSG00000075539	0.054419	6.80465	0.442226	0.510735
TMEM131	protein_coding	ENSG00000075568	-0.116546	6.90137	0.0906904	0.12373
FSCN1	protein_coding	ENSG00000075618	-0.717636	9.30435	3.19398e-27	2.21073e-26
ACTB	protein_coding	ENSG00000075624	-0.63911	12.122	4.08312e-22	2.29361e-21
MOCOS	protein_coding	ENSG00000075643	1.53602	4.26916	1.04819e-78	3.58634e-77
PLD1	protein_coding	ENSG00000075651	1.63605	4.10924	5.68646e-90	2.71766e-88
ATP12A	protein_coding	ENSG00000075673	0.213556	-3.5333	0.862276	0.901069
WDR62	protein_coding	ENSG00000075702	0.847373	6.1442	7.03227e-35	6.54254e-34
DLG1	protein_coding	ENSG00000075711	-0.551755	6.8871	1.04273e-15	4.39556e-15
RAB7A	protein_coding	ENSG00000075785	-0.880879	7.45247	1.35077e-40	1.53908e-39
BCAP29	protein_coding	ENSG00000075790	0.173291	5.86224	0.0100314	0.0161612
SEC31B	protein_coding	ENSG00000075826	1.5647	2.61716	4.28946e-16	1.83876e-15
SART3	protein_coding	ENSG00000075856	-0.552882	6.09122	2.22468e-16	9.69527e-16
ARHGAP15	protein_coding	ENSG00000075884	-1.66696	-2.64073	0.00157885	0.00283382
TUBA3D	protein_coding	ENSG00000075886	-0.979684	-0.61937	0.0115188	0.0184125
PAX2	protein_coding	ENSG00000075891	2.20082	0.666967	5.06496e-31	4.03572e-30
EXOSC7	protein_coding	ENSG00000075914	-1.03223	4.28886	9.40413e-40	1.03717e-38
KIFAP3	protein_coding	ENSG00000075945	1.00972	3.69339	7.87688e-32	6.49984e-31
MKRN2	protein_coding	ENSG00000075975	-0.0928826	4.94344	0.199357	0.252467
MCM6	protein_coding	ENSG00000076003	-0.378388	6.15647	9.53532e-09	2.68785e-08
REXO2	protein_coding	ENSG00000076043	-0.526236	6.55242	4.62987e-13	1.69097e-12
RBM7	protein_coding	ENSG00000076053	-0.573281	5.04652	6.56329e-13	2.37394e-12
RBMS2	protein_coding	ENSG00000076067	0.600243	6.50493	2.26124e-20	1.17918e-19
BAZ2A	protein_coding	ENSG00000076108	-0.672741	7.57685	4.69031e-25	2.96991e-24
PTPN23	protein_coding	ENSG00000076201	0.00449299	5.98684	0.951078	0.978833
MLH1	protein_coding	ENSG00000076242	-0.308546	6.07212	5.98032e-06	1.37332e-05
UNG	protein_coding	ENSG00000076248	-0.902785	5.71031	2.42319e-43	3.03365e-42
FMO4	protein_coding	ENSG00000076258	0.981337	0.208211	1.477e-06	3.56335e-06
KLHL20	protein_coding	ENSG00000076321	0.017733	4.39796	0.828543	0.872595
SLC46A1	protein_coding	ENSG00000076351	1.56061	4.97653	1.71667e-94	9.18874e-93
PLXNA2	protein_coding	ENSG00000076356	0.00502299	5.47667	0.953629	0.981081
SPAG5	protein_coding	ENSG00000076382	-0.358133	7.46789	6.52946e-08	1.74112e-07
ANKRD13A	protein_coding	ENSG00000076513	-0.737472	5.71406	2.77232e-24	1.7048e-23
TPD52	protein_coding	ENSG00000076554	-0.206032	5.2495	0.00355038	0.00610581
ACACB	protein_coding	ENSG00000076555	1.12969	2.11532	2.49449e-22	1.41442e-21
TRAF4	protein_coding	ENSG00000076604	-0.174905	6.18469	0.00917181	0.0148599
PAG1	protein_coding	ENSG00000076641	0.525411	2.68902	1.30054e-07	3.39542e-07
GPATCH1	protein_coding	ENSG00000076650	0.104988	4.01461	0.186685	0.238059
ICAM3	protein_coding	ENSG00000076662	-0.492726	1.4507	0.000995148	0.00183244
NT5C2	protein_coding	ENSG00000076685	0.25576	5.85756	0.000113165	0.000231156
MCAM	protein_coding	ENSG00000076706	1.54317	8.34008	2.65354e-124	2.63028e-122
GPC4	protein_coding	ENSG00000076716	1.63422	5.04548	8.49028e-103	5.24372e-101
MBNL3	protein_coding	ENSG00000076770	0.333694	1.69234	0.0101485	0.01634
CAMSAP3	protein_coding	ENSG00000076826	0.784818	1.72512	1.24622e-08	3.48598e-08
RAP1GAP	protein_coding	ENSG00000076864	0.463325	2.39784	5.46051e-05	0.000114771
XAB2	protein_coding	ENSG00000076924	-0.284801	5.57671	1.51867e-05	3.36958e-05
ARHGEF1	protein_coding	ENSG00000076928	0.212367	6.18815	0.00183414	0.00326884
STXBP2	protein_coding	ENSG00000076944	0.430957	2.45577	0.00035932	0.000697641
MAP2K7	protein_coding	ENSG00000076984	-0.252635	5.48408	0.000250512	0.000494475
DGKD	protein_coding	ENSG00000077044	-1.02765	7.3815	6.55634e-50	9.98247e-49
CTTNBP2	protein_coding	ENSG00000077063	0.568822	1.91712	9.23126e-06	2.08645e-05
RARB	protein_coding	ENSG00000077092	2.27546	-0.185239	3.72858e-22	2.09837e-21
TOP2B	protein_coding	ENSG00000077097	-0.277338	7.41873	4.82587e-05	0.000102055
TM9SF3	protein_coding	ENSG00000077147	-0.787939	8.37132	3.60067e-34	3.25682e-33
NFKB2	protein_coding	ENSG00000077150	-0.4038	6.63627	9.4831e-09	2.67345e-08
UBE2T	protein_coding	ENSG00000077152	1.01542	5.22358	4.32474e-45	5.74573e-44
PPP1R12B	protein_coding	ENSG00000077157	-0.259085	4.09423	0.00108506	0.00198888
DNAJC10	protein_coding	ENSG00000077232	-0.194297	8.12535	0.00281241	0.00489788
GTF3C1	protein_coding	ENSG00000077235	-0.352583	7.21269	1.16216e-07	3.0447e-07
IL4R	protein_coding	ENSG00000077238	-0.172998	5.36336	0.0149633	0.0235139
USP33	protein_coding	ENSG00000077254	-0.0748725	5.99777	0.267465	0.328193
PAK3	protein_coding	ENSG00000077264	0.953994	3.38467	1.41866e-25	9.17597e-25
CAPN6	protein_coding	ENSG00000077274	1.71943	0.803503	1.62545e-23	9.64579e-23
DCX	protein_coding	ENSG00000077279	2.07966	-3.4228	0.00829723	0.0135367
SNRPA	protein_coding	ENSG00000077312	-0.561972	6.52105	2.59812e-18	1.24862e-17
EXOSC5	protein_coding	ENSG00000077348	-0.725651	3.97757	4.52826e-19	2.2429e-18
DYNC1I2	protein_coding	ENSG00000077380	-0.722707	7.20242	1.23856e-26	8.35663e-26
LRCH4	protein_coding	ENSG00000077454	0.632214	3.64413	8.95538e-12	3.04157e-11
FAM76B	protein_coding	ENSG00000077458	-0.258249	4.39523	0.000800709	0.00149359
SIRT6	protein_coding	ENSG00000077463	-0.0586304	3.92597	0.476835	0.544931
POLD3	protein_coding	ENSG00000077514	0.814467	5.0603	1.00096e-31	8.20914e-31
ACTN2	protein_coding	ENSG00000077522	-0.244364	0.285806	0.22015	0.275911
CAPZB	protein_coding	ENSG00000077549	-0.602258	6.82058	4.00358e-21	2.15688e-20
GPR137B	protein_coding	ENSG00000077585	-0.682951	4.44569	2.87382e-18	1.37919e-17
NAALAD2	protein_coding	ENSG00000077616	1.57363	2.45854	3.75448e-41	4.35828e-40
JADE1	protein_coding	ENSG00000077684	0.195026	6.10478	0.00358091	0.00615525
SLC25A43	protein_coding	ENSG00000077713	-0.256054	3.65551	0.00331314	0.00571988
UBE2A	protein_coding	ENSG00000077721	0.493897	5.35756	2.75303e-13	1.01784e-12
FGFR1	protein_coding	ENSG00000077782	-0.363437	6.70143	1.253e-08	3.50453e-08
FBLN1	protein_coding	ENSG00000077942	0.702073	6.98954	5.38469e-26	3.54181e-25
ITGA8	protein_coding	ENSG00000077943	0.62761	-2.05731	0.369697	0.436493
CST7	protein_coding	ENSG00000077984	1.19225	1.04711	5.97036e-13	2.16546e-12
MAP2	protein_coding	ENSG00000078018	2.40022	3.82396	1.66861e-126	1.72497e-124
PIAS2	protein_coding	ENSG00000078043	-0.445743	4.71641	1.17076e-09	3.50966e-09
AMPH	protein_coding	ENSG00000078053	1.34198	4.8006	1.43436e-76	4.63129e-75
ARAF	protein_coding	ENSG00000078061	-0.00382578	6.0093	0.9549	0.982306
MCCC1	protein_coding	ENSG00000078070	0.0629664	4.28135	0.413879	0.481948
LAMP3	protein_coding	ENSG00000078081	1.88106	2.15656	2.98525e-52	4.86837e-51
FAP	protein_coding	ENSG00000078098	1.90424	3.36687	1.33945e-68	3.58481e-67
NEBL	protein_coding	ENSG00000078114	0.597095	2.0474	1.68406e-06	4.04629e-06
ACER3	protein_coding	ENSG00000078124	0.267176	4.95133	0.000177637	0.000355939
UBE2K	protein_coding	ENSG00000078140	-0.866698	6.86662	5.32576e-38	5.52938e-37
PIK3C3	protein_coding	ENSG00000078142	-0.831111	4.67383	1.98101e-29	1.49207e-28
N4BP2	protein_coding	ENSG00000078177	0.116511	5.97754	0.0855354	0.117322
TIGAR	protein_coding	ENSG00000078237	-0.643551	2.10401	1.1153e-08	3.12847e-08
TULP3	protein_coding	ENSG00000078246	1.0874	5.75594	9.80864e-57	1.823e-55
SYNJ2	protein_coding	ENSG00000078269	-0.00835722	6.6569	0.902285	0.935048
ADCY2	protein_coding	ENSG00000078295	1.00888	1.77504	2.36511e-12	8.28992e-12
PPP2R5C	protein_coding	ENSG00000078304	-0.568137	6.49915	1.67546e-17	7.7297e-17
PMS2P1	unprocessed_pseudogene	ENSG00000078319	-0.0717678	3.69517	0.405742	0.473503
RBFOX1	protein_coding	ENSG00000078328	1.64905	1.03874	1.85709e-22	1.05724e-21
GNB1	protein_coding	ENSG00000078369	-1.09826	8.24884	3.71833e-63	8.48943e-62
HOXA9	protein_coding	ENSG00000078399	-0.650549	3.22087	7.33853e-13	2.64734e-12
EDN1	protein_coding	ENSG00000078401	-0.556335	4.33063	6.0513e-11	1.96518e-10
MLLT10	protein_coding	ENSG00000078403	-0.543601	5.78202	3.17147e-15	1.30427e-14
ZCWPW1	protein_coding	ENSG00000078487	0.153274	2.03048	0.214844	0.270035
ADCYAP1R1	protein_coding	ENSG00000078549	0.252512	1.62398	0.062505	0.0883647
FGF20	protein_coding	ENSG00000078579	1.19126	-3.30155	0.0936281	0.127399
NRDC	protein_coding	ENSG00000078618	-0.840019	7.71111	5.73209e-38	5.941e-37
VDAC3	protein_coding	ENSG00000078668	-0.321269	6.72236	5.74856e-07	1.4294e-06
PCM1	protein_coding	ENSG00000078674	-0.390318	6.94455	6.29963e-08	1.68151e-07
TNRC6C	protein_coding	ENSG00000078687	0.127548	3.77067	0.130666	0.172657
CBFA2T2	protein_coding	ENSG00000078699	0.533286	4.66359	9.24409e-13	3.31886e-12
BRINP1	protein_coding	ENSG00000078725	0.0730099	2.6028	0.461067	0.529298
ITCH	protein_coding	ENSG00000078747	-0.493597	6.40268	1.90211e-13	7.09227e-13
PKD2L2	protein_coding	ENSG00000078795	0.723221	-2.35827	0.121574	0.161724
TP53INP2	protein_coding	ENSG00000078804	1.21038	4.93449	4.62109e-53	7.66585e-52
SDF4	protein_coding	ENSG00000078808	-0.299347	7.40461	1.88466e-06	4.5116e-06
MYH7B	protein_coding	ENSG00000078814	0.603212	-1.1216	0.0977096	0.132377
TP73	protein_coding	ENSG00000078900	2.5418	3.27821	2.6891e-149	4.28957e-147
TOLLIP	protein_coding	ENSG00000078902	-0.0415594	4.58462	0.580136	0.645254
UBE2D4	protein_coding	ENSG00000078967	0.521087	4.42004	7.54458e-12	2.5733e-11
CLUL1	protein_coding	ENSG00000079101	1.29115	-3.28075	0.0355234	0.0525083
RUNX1T1	protein_coding	ENSG00000079102	1.58822	-1.9548	1.453e-05	3.22714e-05
THOC1	protein_coding	ENSG00000079134	-0.510077	5.59899	7.35106e-14	2.80255e-13
FKBP7	protein_coding	ENSG00000079150	-0.151378	3.06943	0.127782	0.169207
OSBPL6	protein_coding	ENSG00000079156	0.575104	4.32674	3.23642e-14	1.25816e-13
SLC1A3	protein_coding	ENSG00000079215	-0.421336	5.12931	8.03891e-07	1.97989e-06
XRCC5	protein_coding	ENSG00000079246	-0.707853	8.98861	1.06614e-25	6.93124e-25
SP140	protein_coding	ENSG00000079263	-0.458034	3.27075	1.92602e-06	4.60467e-06
MKNK1	protein_coding	ENSG00000079277	-1.18861	1.06946	1.30973e-12	4.65781e-12
TNS1	protein_coding	ENSG00000079308	-0.153378	7.2135	0.0270631	0.0408208
REXO1	protein_coding	ENSG00000079313	0.368953	5.32595	5.12212e-07	1.27878e-06
SAR1A	protein_coding	ENSG00000079332	-0.838735	7.44538	2.57016e-33	2.252e-32
CDC14A	protein_coding	ENSG00000079335	-0.578151	3.9562	1.69641e-12	5.98877e-12
RAPGEF3	protein_coding	ENSG00000079337	0.931517	2.09905	1.07964e-13	4.0799e-13
CEACAM1	protein_coding	ENSG00000079385	3.33822	0.167095	9.39203e-40	1.03631e-38
SENP1	protein_coding	ENSG00000079387	0.0302041	5.55505	0.663015	0.723904
CIC	protein_coding	ENSG00000079432	0.391747	6.82774	6.21804e-09	1.77499e-08
LIPE	protein_coding	ENSG00000079435	-0.737721	3.15368	6.98342e-13	2.52037e-12
FDFT1	protein_coding	ENSG00000079459	0.224487	7.56984	0.000578731	0.00109789
PAFAH1B3	protein_coding	ENSG00000079462	0.00931678	5.10359	0.895881	0.929492
OPHN1	protein_coding	ENSG00000079482	1.1219	3.86804	1.58936e-38	1.68647e-37
KIF22	protein_coding	ENSG00000079616	0.0541891	6.80189	0.411792	0.479657
CARMIL1	protein_coding	ENSG00000079691	0.603042	4.12463	1.46747e-13	5.50833e-13
PGM1	protein_coding	ENSG00000079739	0.934039	5.59375	4.99355e-45	6.62333e-44
DDX1	protein_coding	ENSG00000079785	-0.966627	7.73228	2.98644e-48	4.35966e-47
DNM2	protein_coding	ENSG00000079805	-0.783999	6.63561	4.72844e-34	4.2609e-33
EPB41L2	protein_coding	ENSG00000079819	-0.775539	8.66551	2.81244e-29	2.10776e-28
RIMS1	protein_coding	ENSG00000079841	0.48549	0.147933	0.0225672	0.0344952
MOXD1	protein_coding	ENSG00000079931	0.96548	5.16931	1.94218e-43	2.44034e-42
STX7	protein_coding	ENSG00000079950	-0.0195524	5.20605	0.787743	0.836981
RABL2B	protein_coding	ENSG00000079974	0.0364672	5.01842	0.611876	0.675416
KEAP1	protein_coding	ENSG00000079999	0.297255	5.77737	8.71457e-06	1.97263e-05
DDX43	protein_coding	ENSG00000080007	-1.01033	4.29237	6.92846e-38	7.16248e-37
PTPRH	protein_coding	ENSG00000080031	1.31186	2.31539	3.75548e-26	2.48512e-25
DCT	protein_coding	ENSG00000080166	-0.266492	-1.45067	0.635421	0.697697
SLC35C2	protein_coding	ENSG00000080189	0.014339	6.05868	0.82639	0.871051
CRYBG3	protein_coding	ENSG00000080200	0.314346	6.11874	8.33736e-06	1.88991e-05
EPHA6	protein_coding	ENSG00000080224	1.26659	1.81088	2.39673e-21	1.30257e-20
RFX3	protein_coding	ENSG00000080298	0.62008	3.51003	7.25302e-11	2.3447e-10
RIF1	protein_coding	ENSG00000080345	-0.862743	7.18106	5.38052e-34	4.84127e-33
RAB21	protein_coding	ENSG00000080371	-0.723434	5.48661	4.02219e-26	2.65796e-25
SLC4A4	protein_coding	ENSG00000080493	2.40712	2.36163	5.78999e-85	2.41705e-83
SMARCA2	protein_coding	ENSG00000080503	0.828918	5.72534	1.97806e-33	1.74079e-32
RDH8	protein_coding	ENSG00000080511	-3.34572	-1.75879	1.41734e-07	3.68398e-07
SESN1	protein_coding	ENSG00000080546	0.10046	3.8647	0.200888	0.254178
MID2	protein_coding	ENSG00000080561	0.533861	1.81148	0.000101334	0.000207925
COL5A3	protein_coding	ENSG00000080573	0.0491779	5.11264	0.550221	0.616886
SRCAP	protein_coding	ENSG00000080603	-1.24953	3.09929	1.189e-25	7.71537e-25
PUM3	protein_coding	ENSG00000080608	-0.97001	6.11121	6.93681e-40	7.69631e-39
CHRNA3	protein_coding	ENSG00000080644	1.2584	1.83952	1.86786e-22	1.06312e-21
KCNN2	protein_coding	ENSG00000080709	-0.474583	-0.0666943	0.0144154	0.0227033
CNOT4	protein_coding	ENSG00000080802	-0.671596	4.714	9.463e-17	4.20623e-16
PSEN1	protein_coding	ENSG00000080815	-0.559279	6.61884	6.41751e-18	3.02798e-17
CPOX	protein_coding	ENSG00000080819	-0.111583	5.97788	0.0892985	0.122004
CLDND1	protein_coding	ENSG00000080822	-0.055168	6.47966	0.411165	0.479065
MOK	protein_coding	ENSG00000080823	-0.120589	4.5038	0.1192	0.158882
HSP90AA1	protein_coding	ENSG00000080824	-1.42912	11.1396	3.06315e-87	1.36634e-85
RBL1	protein_coding	ENSG00000080839	0.0797727	4.9673	0.276929	0.338564
DLGAP4	protein_coding	ENSG00000080845	0.781413	6.99157	1.23374e-31	1.00907e-30
IGSF9B	protein_coding	ENSG00000080854	0.204215	2.88103	0.068654	0.096318
CROCCP3	transcribed_unprocessed_pseudogene	ENSG00000080947	1.01107	2.00958	1.67583e-12	5.91873e-12
NDC80	protein_coding	ENSG00000080986	0.79263	7.31605	4.28712e-27	2.94787e-26
AP4E1	protein_coding	ENSG00000081014	-0.1983	4.49678	0.0078555	0.0128622
RSBN1	protein_coding	ENSG00000081019	-0.0764845	4.67315	0.33651	0.401661
MAGI3	protein_coding	ENSG00000081026	0.0731933	5.00968	0.30804	0.372179
AFP	protein_coding	ENSG00000081051	-0.12435	2.02304	0.336387	0.401542
COL4A4	protein_coding	ENSG00000081052	2.30188	4.20976	3.22695e-170	6.93996e-168
TCF7	protein_coding	ENSG00000081059	0.0954734	-1.38578	0.8406	0.882821
OSTM1	protein_coding	ENSG00000081087	-0.0899099	4.64163	0.220598	0.276387
CDH7	protein_coding	ENSG00000081138	1.07174	-1.73082	0.00673623	0.0111332
IMPG2	protein_coding	ENSG00000081148	1.31046	-1.02942	1.21934e-05	2.72577e-05
PCNP	protein_coding	ENSG00000081154	-0.797468	7.39003	1.68756e-34	1.55028e-33
EXD2	protein_coding	ENSG00000081177	-0.263878	4.54969	0.000563827	0.00107096
ARG2	protein_coding	ENSG00000081181	0.154093	4.67075	0.0334173	0.0495886
MEF2C	protein_coding	ENSG00000081189	-0.924187	0.931514	3.3059e-08	8.98749e-08
PTPRC	protein_coding	ENSG00000081237	0.184544	-0.794647	0.62545	0.68857
UBA5	protein_coding	ENSG00000081307	-0.700651	5.71003	1.83986e-26	1.23239e-25
STK17B	protein_coding	ENSG00000081320	-0.152621	4.94868	0.0408823	0.0597967
CDC14B	protein_coding	ENSG00000081377	-0.4216	4.61483	8.58132e-09	2.42661e-08
ZNF510	protein_coding	ENSG00000081386	-0.166302	4.39291	0.0292396	0.0438321
LRP2	protein_coding	ENSG00000081479	-0.310256	-2.70165	0.5491	0.615772
JMJD4	protein_coding	ENSG00000081692	-0.00120748	3.78009	0.995627	1
DUSP12	protein_coding	ENSG00000081721	-0.751831	4.90089	8.07374e-25	5.06834e-24
AACS	protein_coding	ENSG00000081760	-0.290814	5.7463	1.07978e-05	2.42618e-05
DELE1	protein_coding	ENSG00000081791	0.20762	5.64165	0.00165937	0.00297324
CADPS2	protein_coding	ENSG00000081803	1.67458	2.37036	1.41083e-47	2.02881e-46
PCDHB4	protein_coding	ENSG00000081818	0.767787	-0.72239	0.00158185	0.00283877
PCDHA6	protein_coding	ENSG00000081842	-0.314289	3.19823	0.000752868	0.00140904
PCDHGA2	protein_coding	ENSG00000081853	-0.378294	-0.160441	0.0740896	0.103227
HSPB11	protein_coding	ENSG00000081870	0.433634	5.30448	1.3133e-09	3.92522e-09
PHLPP1	protein_coding	ENSG00000081913	-0.562133	3.80728	5.79199e-12	1.98763e-11
ATP8B1	protein_coding	ENSG00000081923	0.41688	3.23265	1.26571e-05	2.82682e-05
SMARCD3	protein_coding	ENSG00000082014	-0.0752684	3.2403	0.422462	0.490733
WDR70	protein_coding	ENSG00000082068	-0.545036	5.21907	2.99711e-14	1.16909e-13
FYB1	protein_coding	ENSG00000082074	-0.654896	-3.9091	0.763505	0.815726
MPP4	protein_coding	ENSG00000082126	-0.139849	2.5517	0.201799	0.255237
STRADB	protein_coding	ENSG00000082146	0.484751	4.3778	5.51686e-11	1.7955e-10
BZW1	protein_coding	ENSG00000082153	-1.11344	8.43655	2.56901e-59	5.18256e-58
C1QTNF3	protein_coding	ENSG00000082196	1.29342	-0.754618	4.78301e-06	1.10767e-05
ME2	protein_coding	ENSG00000082212	0.170432	6.48167	0.0125695	0.0199856
C5orf22	protein_coding	ENSG00000082213	-0.0441565	5.26565	0.53465	0.601782
CCNT2	protein_coding	ENSG00000082258	-0.828831	6.12116	4.40823e-37	4.41869e-36
FAM135A	protein_coding	ENSG00000082269	0.250163	4.54098	0.000686741	0.0012916
COL19A1	protein_coding	ENSG00000082293	-0.724538	0.356173	0.00142583	0.00257104
EPB41L3	protein_coding	ENSG00000082397	-0.585821	7.69897	2.3604e-17	1.08069e-16
COBLL1	protein_coding	ENSG00000082438	0.871295	4.62846	1.9989e-30	1.5607e-29
DLG3	protein_coding	ENSG00000082458	0.444441	4.0096	1.76407e-07	4.55279e-07
KCNK2	protein_coding	ENSG00000082482	0.258112	-0.836585	0.333857	0.399068
SERTAD4	protein_coding	ENSG00000082497	0.943751	5.93593	1.40304e-43	1.7703e-42
TRAF5	protein_coding	ENSG00000082512	0.719185	4.6501	2.98578e-23	1.7524e-22
MRPL22	protein_coding	ENSG00000082515	-0.782786	5.10357	9.47071e-28	6.69369e-27
GEMIN5	protein_coding	ENSG00000082516	-1.16825	6.68676	4.85154e-63	1.10348e-61
OPRK1	protein_coding	ENSG00000082556	1.8689	-1.27479	3.90386e-09	1.13265e-08
NFE2L1	protein_coding	ENSG00000082641	-0.396559	8.93792	8.87396e-10	2.6819e-09
SEMA5B	protein_coding	ENSG00000082684	2.99815	-2.87697	0.00173657	0.00310486
GSK3B	protein_coding	ENSG00000082701	-0.768509	6.88114	3.137e-31	2.51534e-30
ITGB5	protein_coding	ENSG00000082781	-0.267919	8.53885	2.42786e-05	5.28941e-05
ERC1	protein_coding	ENSG00000082805	0.438444	6.98596	2.43595e-10	7.62506e-10
XPO1	protein_coding	ENSG00000082898	-1.15065	8.88778	4.69063e-65	1.13096e-63
RNF13	protein_coding	ENSG00000082996	-0.512027	4.51063	4.49536e-12	1.55218e-11
TRPM3	protein_coding	ENSG00000083067	2.00238	-1.75439	0.000107293	0.000219535
PALB2	protein_coding	ENSG00000083093	-1.08229	4.86215	8.71363e-51	1.36644e-49
DOP1A	protein_coding	ENSG00000083097	1.09806	2.86957	1.69786e-26	1.13917e-25
LYRM2	protein_coding	ENSG00000083099	-0.485214	4.9273	1.46544e-11	4.9237e-11
BCKDHB	protein_coding	ENSG00000083123	0.606973	2.86908	4.37221e-10	1.34551e-09
KAT6A	protein_coding	ENSG00000083168	-0.784935	6.44516	1.0219e-26	6.92389e-26
TUT7	protein_coding	ENSG00000083223	-1.00651	5.62425	3.84705e-43	4.79131e-42
ULK2	protein_coding	ENSG00000083290	1.79802	2.05307	1.17954e-48	1.73877e-47
TNPO1	protein_coding	ENSG00000083312	-0.55702	8.28466	1.35397e-16	5.96763e-16
PLOD1	protein_coding	ENSG00000083444	-0.132525	8.25082	0.0370144	0.0545433
P2RX5	protein_coding	ENSG00000083454	-0.612025	0.865172	0.000300107	0.000587601
ITGAE	protein_coding	ENSG00000083457	-0.169794	3.46865	0.0706352	0.0987573
DIS3	protein_coding	ENSG00000083520	-1.31538	6.0601	9.10078e-79	3.13158e-77
PIBF1	protein_coding	ENSG00000083535	-0.961456	3.84804	3.53068e-29	2.63374e-28
TDRD3	protein_coding	ENSG00000083544	-0.0721155	3.28496	0.456473	0.524486
NUFIP1	protein_coding	ENSG00000083635	-1.10073	3.8973	1.9799e-37	2.01053e-36
PDS5B	protein_coding	ENSG00000083642	-0.784813	6.13764	2.73079e-28	1.96641e-27
OXCT1	protein_coding	ENSG00000083720	0.296008	6.623	1.1407e-05	2.55925e-05
RRAGB	protein_coding	ENSG00000083750	-0.64129	3.17244	1.51739e-11	5.09471e-11
CYLD	protein_coding	ENSG00000083799	-0.469513	5.35703	7.59199e-11	2.44902e-10
SLC27A5	protein_coding	ENSG00000083807	0.0734118	1.44527	0.642699	0.704557
ZNF324	protein_coding	ENSG00000083812	-0.948937	2.73767	5.70553e-22	3.18418e-21
ZNF671	protein_coding	ENSG00000083814	-0.212887	2.17199	0.0645629	0.0910442
ZNF416	protein_coding	ENSG00000083817	-1.41151	1.94346	3.28328e-34	2.9787e-33
ZNF586	protein_coding	ENSG00000083828	-0.442378	2.41847	2.75218e-05	5.96202e-05
ZNF446	protein_coding	ENSG00000083838	0.764321	2.03812	2.35046e-10	7.36703e-10
ZNF264	protein_coding	ENSG00000083844	-0.293006	4.25818	0.000134904	0.000273429
RPS5	protein_coding	ENSG00000083845	-0.154035	8.04826	0.0219036	0.0335518
FAT1	protein_coding	ENSG00000083857	-0.130621	8.36724	0.0808534	0.111599
YTHDC1	protein_coding	ENSG00000083896	-0.901391	7.07758	1.27501e-43	1.61129e-42
CHMP2B	protein_coding	ENSG00000083937	-0.469684	5.74214	1.60905e-11	5.39045e-11
SMAP2	protein_coding	ENSG00000084070	-0.423919	5.34726	3.03662e-10	9.43781e-10
PPIE	protein_coding	ENSG00000084072	-0.408452	5.33501	1.90653e-09	5.64715e-09
ZMPSTE24	protein_coding	ENSG00000084073	-0.82917	7.08521	6.27606e-36	6.08091e-35
STARD7	protein_coding	ENSG00000084090	0.190696	7.35282	0.00302231	0.00524483
NOA1	protein_coding	ENSG00000084092	-0.221895	5.59293	0.00070998	0.00133266
REST	protein_coding	ENSG00000084093	-0.91034	6.86264	8.92696e-40	9.87253e-39
HAL	protein_coding	ENSG00000084110	2.47854	-2.0471	1.59569e-07	4.13238e-07
SSH1	protein_coding	ENSG00000084112	0.984309	6.25475	1.00231e-45	1.3694e-44
GSTP1	protein_coding	ENSG00000084207	0.0708412	8.1691	0.290519	0.353546
APLP2	protein_coding	ENSG00000084234	0.489991	8.82422	4.28808e-14	1.65524e-13
FAM234B	protein_coding	ENSG00000084444	0.464346	3.53746	2.64723e-07	6.75608e-07
SLCO1A2	protein_coding	ENSG00000084453	1.77784	0.0931862	7.72225e-18	3.62161e-17
WBP11	protein_coding	ENSG00000084463	-0.794432	7.80994	1.41642e-33	1.25339e-32
EIF3I	protein_coding	ENSG00000084623	-0.644794	7.82808	3.30925e-23	1.93705e-22
NKAIN1	protein_coding	ENSG00000084628	-0.285691	-1.91658	0.521241	0.588862
COL16A1	protein_coding	ENSG00000084636	0.946498	7.07988	5.86774e-45	7.76573e-44
TXLNA	protein_coding	ENSG00000084652	-0.319732	7.48998	4.29586e-07	1.07797e-06
APOB	protein_coding	ENSG00000084674	0.798539	-3.20556	0.270585	0.331515
NCOA1	protein_coding	ENSG00000084676	0.0658836	5.6847	0.343665	0.409206
AGBL5	protein_coding	ENSG00000084693	0.0433028	6.03969	0.52423	0.591739
EFR3B	protein_coding	ENSG00000084710	1.47696	5.22858	1.40159e-87	6.36983e-86
KIF3C	protein_coding	ENSG00000084731	0.687705	6.04354	1.88588e-23	1.11555e-22
RAB10	protein_coding	ENSG00000084733	-0.188445	6.98623	0.00428057	0.0072815
GCKR	protein_coding	ENSG00000084734	-1.01113	-3.95469	0.695547	0.754307
HADHA	protein_coding	ENSG00000084754	-0.349558	8.03681	5.81224e-08	1.55417e-07
MAPRE3	protein_coding	ENSG00000084764	1.4372	4.19145	2.72086e-71	7.7651e-70
CAD	protein_coding	ENSG00000084774	0.102923	7.45266	0.140011	0.183665
CD59	protein_coding	ENSG00000085063	-0.410576	7.08858	7.07184e-10	2.14966e-09
CD82	protein_coding	ENSG00000085117	0.343359	5.12375	6.8461e-06	1.56483e-05
BCORL1	protein_coding	ENSG00000085185	0.274434	4.32052	0.000343272	0.000667613
ATRX	protein_coding	ENSG00000085224	-0.371325	7.54128	5.97851e-08	1.59774e-07
AK6	protein_coding	ENSG00000085231	-0.712253	3.50984	4.32923e-12	1.4961e-11
MYNN	protein_coding	ENSG00000085274	-0.770008	4.59692	5.23339e-24	3.18014e-23
MECOM	protein_coding	ENSG00000085276	-0.480036	4.57788	7.7695e-10	2.35609e-09
SCAMP1	protein_coding	ENSG00000085365	0.0872222	5.60367	0.207403	0.261597
PREP	protein_coding	ENSG00000085377	-0.853317	5.60822	1.79511e-36	1.76918e-35
HACE1	protein_coding	ENSG00000085382	0.471725	3.22832	3.61926e-07	9.13806e-07
SEH1L	protein_coding	ENSG00000085415	-1.05624	7.3531	1.37061e-57	2.62641e-56
WDR47	protein_coding	ENSG00000085433	-0.0841097	4.35255	0.27725	0.338905
WDFY1	protein_coding	ENSG00000085449	-0.539839	6.73502	1.83547e-16	8.03543e-16
OVGP1	protein_coding	ENSG00000085465	-2.08986	0.0817644	9.47514e-22	5.243e-21
SLC25A24	protein_coding	ENSG00000085491	-0.186321	6.11377	0.00836782	0.0136444
MAP3K4	protein_coding	ENSG00000085511	-0.902646	6.22198	1.28529e-39	1.4117e-38
PILRA	protein_coding	ENSG00000085514	0.0142452	0.359962	0.973977	1
IGSF9	protein_coding	ENSG00000085552	1.0294	3.58117	1.18871e-27	8.36962e-27
ABCB1	protein_coding	ENSG00000085563	-0.450242	5.22917	7.92316e-11	2.55311e-10
ZNF213	protein_coding	ENSG00000085644	-0.627368	4.02276	7.48289e-14	2.85055e-13
AKR1B1	protein_coding	ENSG00000085662	0.0839375	6.37342	0.196785	0.249551
CPNE3	protein_coding	ENSG00000085719	0.169656	6.79419	0.00893738	0.0145054
RRN3	protein_coding	ENSG00000085721	-0.758895	5.84901	1.6652e-28	1.21104e-27
CTTN	protein_coding	ENSG00000085733	-0.302063	8.1102	3.75476e-06	8.7662e-06
WNT11	protein_coding	ENSG00000085741	3.29043	0.36228	1.48599e-41	1.75284e-40
MTIF2	protein_coding	ENSG00000085760	-0.765032	6.33702	1.21911e-27	8.57614e-27
DDHD2	protein_coding	ENSG00000085788	-0.189967	5.39679	0.00589711	0.00983478
TTC39A	protein_coding	ENSG00000085831	1.30047	1.70729	4.47997e-24	2.73118e-23
EPS15	protein_coding	ENSG00000085832	0.249911	5.80916	0.000268088	0.000527654
ORC1	protein_coding	ENSG00000085840	-0.534574	5.25556	3.54452e-15	1.45372e-14
MGST2	protein_coding	ENSG00000085871	0.731615	3.69621	8.82803e-18	4.12574e-17
CHERP	protein_coding	ENSG00000085872	-0.886533	6.05435	4.14841e-40	4.66275e-39
ATG16L1	protein_coding	ENSG00000085978	-0.62715	5.11089	2.05472e-19	1.03389e-18
USP40	protein_coding	ENSG00000085982	-0.430399	5.5954	3.15408e-10	9.78772e-10
POMGNT1	protein_coding	ENSG00000085998	-0.0514411	6.73073	0.418476	0.486714
RAD54L	protein_coding	ENSG00000085999	1.05306	5.13648	1.38008e-50	2.15159e-49
MAST2	protein_coding	ENSG00000086015	0.631792	7.09935	1.2408e-22	7.11431e-22
DNAJA1	protein_coding	ENSG00000086061	-0.906117	9.42848	6.68255e-40	7.42105e-39
B4GALT1	protein_coding	ENSG00000086062	0.292809	7.28266	4.48503e-06	1.04086e-05
CHMP5	protein_coding	ENSG00000086065	-0.59055	6.50949	2.78204e-17	1.26843e-16
NFX1	protein_coding	ENSG00000086102	-0.293446	6.29478	4.92613e-06	1.1395e-05
AQP6	protein_coding	ENSG00000086159	0.151557	-3.34774	1	1
DIMT1	protein_coding	ENSG00000086189	-0.886195	5.6493	4.48845e-32	3.73449e-31
IPO11	protein_coding	ENSG00000086200	-0.88686	5.44654	8.57003e-39	9.16636e-38
FOLH1	protein_coding	ENSG00000086205	1.18187	0.772133	3.81623e-12	1.32318e-11
EIF2AK1	protein_coding	ENSG00000086232	-0.397613	8.25122	8.80009e-10	2.66057e-09
EPDR1	protein_coding	ENSG00000086289	1.07862	5.6632	8.3607e-59	1.66571e-57
SNX10	protein_coding	ENSG00000086300	1.51554	4.04762	3.74943e-76	1.19937e-74
SEPHS1	protein_coding	ENSG00000086475	-0.735203	6.78168	8.36055e-29	6.15843e-28
MRPL28	protein_coding	ENSG00000086504	-0.357979	6.22171	4.62426e-08	1.2448e-07
ITPKC	protein_coding	ENSG00000086544	-0.683596	4.6424	1.1277e-20	5.962e-20
FAT2	protein_coding	ENSG00000086570	2.36364	-1.07042	1.4643e-09	4.36355e-09
RBM22	protein_coding	ENSG00000086589	-0.543202	6.31066	4.29364e-17	1.94218e-16
TMED2	protein_coding	ENSG00000086598	-0.706415	8.09156	2.18514e-27	1.52032e-26
ERO1B	protein_coding	ENSG00000086619	-0.909572	3.24418	5.85122e-24	3.5474e-23
ZFAND6	protein_coding	ENSG00000086666	-0.0346476	5.6054	0.623439	0.686701
HSD17B2	protein_coding	ENSG00000086696	-2.8048	-1.60551	2.22439e-11	7.40142e-11
TXLNG	protein_coding	ENSG00000086712	-0.92953	5.37782	9.02617e-36	8.69305e-35
PPEF1	protein_coding	ENSG00000086717	-0.735884	-3.58518	0.517865	0.585625
LAT2	protein_coding	ENSG00000086730	1.0827	5.24748	1.28751e-51	2.05789e-50
HUWE1	protein_coding	ENSG00000086758	-0.575272	8.93957	1.4174e-12	5.02813e-12
ZW10	protein_coding	ENSG00000086827	-0.492915	6.07268	5.6214e-14	2.15609e-13
ALG9	protein_coding	ENSG00000086848	0.0925758	3.89959	0.253358	0.31294
MYBPC2	protein_coding	ENSG00000086967	2.02448	-2.00944	0.00141145	0.00254701
NOX4	protein_coding	ENSG00000086991	2.49706	2.36867	4.73602e-83	1.83995e-81
ACOX3	protein_coding	ENSG00000087008	0.437007	2.71077	4.63561e-05	9.82817e-05
MTMR2	protein_coding	ENSG00000087053	-1.1076	6.61547	9.98149e-62	2.16989e-60
PPP1R15A	protein_coding	ENSG00000087074	-1.36684	5.96696	3.10892e-40	3.50419e-39
HSD17B14	protein_coding	ENSG00000087076	0.845632	2.5768	2.43023e-15	1.00614e-14
TRIP6	protein_coding	ENSG00000087077	0.264965	6.38469	0.00010991	0.000224795
ACHE	protein_coding	ENSG00000087085	0.260571	3.0302	0.00921692	0.0149279
FTL	protein_coding	ENSG00000087086	-0.145523	9.63298	0.0277307	0.041786
SRRT	protein_coding	ENSG00000087087	-1.07218	8.03469	1.5932e-62	3.5698e-61
BAX	protein_coding	ENSG00000087088	0.128701	6.79706	0.0514409	0.0738721
NLK	protein_coding	ENSG00000087095	-0.542008	5.80614	2.03055e-16	8.86851e-16
PIGS	protein_coding	ENSG00000087111	0.470149	5.89993	1.13276e-12	4.04518e-12
ADAMTS2	protein_coding	ENSG00000087116	2.16817	3.41556	9.4467e-103	5.8195e-101
ATXN7L3	protein_coding	ENSG00000087152	-0.614863	6.794	1.20713e-20	6.36797e-20
PGS1	protein_coding	ENSG00000087157	0.547885	4.9386	1.99018e-14	7.84704e-14
PSMC5	protein_coding	ENSG00000087191	-0.846889	8.15202	1.79866e-37	1.8288e-36
UIMC1	protein_coding	ENSG00000087206	-0.028056	5.23615	0.6982	0.756389
MMP2	protein_coding	ENSG00000087245	0.440141	8.21869	4.04064e-12	1.39898e-11
LPCAT2	protein_coding	ENSG00000087253	0.182744	-0.761103	0.531444	0.598789
GNAO1	protein_coding	ENSG00000087258	0.958367	3.83507	1.32947e-29	1.00828e-28
OGFOD1	protein_coding	ENSG00000087263	-0.538061	6.23848	3.11091e-16	1.34481e-15
SH3BP2	protein_coding	ENSG00000087266	0.425368	4.58609	3.94494e-08	1.0655e-07
NOP14	protein_coding	ENSG00000087269	-1.49032	6.14085	7.07191e-108	4.92316e-106
ADD1	protein_coding	ENSG00000087274	-0.408758	7.02758	1.83276e-10	5.78049e-10
L2HGDH	protein_coding	ENSG00000087299	0.69248	5.39483	1.92893e-23	1.14046e-22
TXNDC16	protein_coding	ENSG00000087301	0.63416	3.37995	2.9397e-12	1.02517e-11
RTRAF	protein_coding	ENSG00000087302	-0.672385	7.39267	2.1019e-20	1.09799e-19
NID2	protein_coding	ENSG00000087303	0.536486	1.15747	0.00302265	0.00524506
GMCL1	protein_coding	ENSG00000087338	-0.0907747	5.80685	0.175473	0.225048
SF3B2	protein_coding	ENSG00000087365	-0.753782	8.33695	4.77793e-31	3.8108e-30
KLHL42	protein_coding	ENSG00000087448	0.267149	6.04752	8.01353e-05	0.000165926
GNAS	protein_coding	ENSG00000087460	-0.276325	9.64321	2.78479e-05	6.02941e-05
DNM1L	protein_coding	ENSG00000087470	-0.328507	7.25951	5.34471e-07	1.33145e-06
PTHLH	protein_coding	ENSG00000087494	-1.28788	4.02406	2.97097e-37	2.99672e-36
PHACTR3	protein_coding	ENSG00000087495	1.53497	0.907626	2.54171e-20	1.32343e-19
ERGIC2	protein_coding	ENSG00000087502	-0.602251	6.73018	3.70309e-19	1.84062e-18
TFAP2C	protein_coding	ENSG00000087510	-4.36395	-3.41873	7.42667e-09	2.10951e-08
AURKA	protein_coding	ENSG00000087586	-0.433959	7.66115	2.85312e-11	9.43739e-11
CASS4	protein_coding	ENSG00000087589	-1.87213	1.39486	1.47758e-28	1.07752e-27
PIR	protein_coding	ENSG00000087842	0.337006	2.87041	0.000690659	0.00129866
AAMDC	protein_coding	ENSG00000087884	-0.431155	2.56736	2.88577e-05	6.24076e-05
RFX2	protein_coding	ENSG00000087903	0.538788	3.46056	1.69924e-09	5.04618e-09
METTL2A	protein_coding	ENSG00000087995	-0.72613	5.5226	1.70483e-27	1.19373e-26
SULT2B1	protein_coding	ENSG00000088002	0.816908	-3.1537	0.189471	0.241253
ALG6	protein_coding	ENSG00000088035	0.243674	3.66385	0.00555328	0.00929096
CNOT3	protein_coding	ENSG00000088038	-0.460168	6.41299	3.11687e-12	1.08554e-11
GP6	protein_coding	ENSG00000088053	2.98945	2.36026	2.34856e-120	2.12668e-118
PTPN4	protein_coding	ENSG00000088179	-0.032089	4.74101	0.663606	0.724483
DDX18	protein_coding	ENSG00000088205	-1.33447	7.79828	1.09502e-75	3.47965e-74
KHSRP	protein_coding	ENSG00000088247	-0.840385	8.0613	4.39031e-40	4.93234e-39
GNA11	protein_coding	ENSG00000088256	-0.669376	6.51413	3.09633e-25	1.97462e-24
ASAP3	protein_coding	ENSG00000088280	1.47097	4.21089	5.43766e-73	1.62301e-71
EDEM2	protein_coding	ENSG00000088298	0.235669	5.25973	0.000723068	0.00135569
DNMT3B	protein_coding	ENSG00000088305	2.26734	4.99977	9.32574e-198	3.07711e-195
REM1	protein_coding	ENSG00000088320	-0.565869	-3.55746	0.790293	0.839204
TPX2	protein_coding	ENSG00000088325	-0.547968	9.01512	1.60739e-15	6.70893e-15
FER1L4	transcribed_unitary_pseudogene	ENSG00000088340	1.95347	1.98739	6.8503e-29	5.07078e-28
PDRG1	protein_coding	ENSG00000088356	0.0551236	4.9983	0.454614	0.522674
EPB41L1	protein_coding	ENSG00000088367	0.142759	6.42442	0.0270165	0.0407633
DOCK9	protein_coding	ENSG00000088387	0.138539	4.40303	0.0670373	0.0942192
ANKRD10	protein_coding	ENSG00000088448	-0.401457	5.75062	6.72355e-09	1.91476e-08
TGDS	protein_coding	ENSG00000088451	-0.997736	4.41677	3.04384e-35	2.86731e-34
DOCK3	protein_coding	ENSG00000088538	1.92376	2.90467	1.31674e-72	3.90114e-71
C3orf18	protein_coding	ENSG00000088543	-0.086917	3.81021	0.308849	0.373035
COQ9	protein_coding	ENSG00000088682	0.242814	5.13414	0.000478077	0.000915886
TMEM40	protein_coding	ENSG00000088726	3.27243	1.29919	1.42279e-77	4.75981e-76
KIF9	protein_coding	ENSG00000088727	-0.850199	2.72629	4.83009e-16	2.06757e-15
ARHGAP28	protein_coding	ENSG00000088756	2.01682	3.41617	2.97534e-103	1.85666e-101
CRLS1	protein_coding	ENSG00000088766	-0.750793	4.67485	2.1045e-25	1.35068e-24
PPP1R13B	protein_coding	ENSG00000088808	0.0960565	4.32399	0.2237	0.279866
ATRN	protein_coding	ENSG00000088812	-0.0880725	6.56626	0.197412	0.250332
SMOX	protein_coding	ENSG00000088826	-1.36886	4.68078	1.65922e-69	4.51589e-68
SIGLEC1	protein_coding	ENSG00000088827	0.521294	-2.86455	0.446991	0.515374
FKBP1A	protein_coding	ENSG00000088832	-0.0465034	6.85708	0.487142	0.55534
NSFL1C	protein_coding	ENSG00000088833	-0.816063	6.9938	7.7177e-36	7.45075e-35
SLC4A11	protein_coding	ENSG00000088836	1.15985	4.33895	2.78978e-48	4.07752e-47
C20orf194	protein_coding	ENSG00000088854	0.0732846	4.24228	0.348245	0.414128
ZNF343	protein_coding	ENSG00000088876	-0.64534	3.94359	9.94113e-15	3.98224e-14
EBF4	protein_coding	ENSG00000088881	1.96507	1.16481	2.27654e-31	1.84011e-30
MAVS	protein_coding	ENSG00000088888	1.41861	6.44455	1.13667e-100	6.727e-99
LZTS3	protein_coding	ENSG00000088899	1.46631	5.35811	7.77829e-102	4.70743e-100
XRN2	protein_coding	ENSG00000088930	-1.04008	7.60399	7.81185e-57	1.45638e-55
KIZ	protein_coding	ENSG00000088970	0.274357	3.27335	0.00243152	0.00426942
DYNLL1	protein_coding	ENSG00000088986	-0.430166	7.69607	1.82454e-10	5.75607e-10
TESC	protein_coding	ENSG00000088992	-1.32215	-0.546689	2.2126e-08	6.07835e-08
SNX5	protein_coding	ENSG00000089006	-0.112029	6.58958	0.0787859	0.109064
RPL6	protein_coding	ENSG00000089009	-0.706543	9.48705	1.99006e-25	1.27928e-24
MAPKAPK5	protein_coding	ENSG00000089022	-0.427543	5.34099	6.86995e-10	2.0904e-09
P2RX7	protein_coding	ENSG00000089041	2.22319	0.274393	1.63021e-23	9.67163e-23
ESF1	protein_coding	ENSG00000089048	-1.5993	5.95176	6.34198e-88	2.90417e-86
RBBP9	protein_coding	ENSG00000089050	0.543372	4.7151	9.07788e-14	3.44128e-13
ANAPC5	protein_coding	ENSG00000089053	-0.196815	6.23965	0.00256022	0.00448461
SLC23A2	protein_coding	ENSG00000089057	0.533515	5.42826	7.19515e-15	2.90544e-14
SLC8B1	protein_coding	ENSG00000089060	0.316358	4.67754	2.02897e-05	4.45179e-05
TMEM230	protein_coding	ENSG00000089063	0.0122454	6.16539	0.856143	0.895982
DZANK1	protein_coding	ENSG00000089091	0.121583	1.71196	0.397667	0.465139
KDM2B	protein_coding	ENSG00000089094	0.428497	5.34473	4.30701e-10	1.32596e-09
CFAP61	protein_coding	ENSG00000089101	-0.829356	-3.07081	0.114178	0.15278
LHX5	protein_coding	ENSG00000089116	-1.14323	1.23092	8.43913e-16	3.57184e-15
TASP1	protein_coding	ENSG00000089123	-0.22914	2.33317	0.0435523	0.0633978
OAS1	protein_coding	ENSG00000089127	1.72627	0.291937	1.56833e-16	6.88221e-16
GCN1	protein_coding	ENSG00000089154	-0.345818	7.81674	5.01109e-07	1.2521e-06
RPLP0	protein_coding	ENSG00000089157	-0.361022	10.6742	1.49392e-07	3.87634e-07
PXN	protein_coding	ENSG00000089159	-0.538935	8.07912	4.67687e-17	2.11314e-16
SIRT4	protein_coding	ENSG00000089163	0.255369	-0.654725	0.286989	0.349727
RPH3A	protein_coding	ENSG00000089169	-1.21694	-2.70024	0.0595432	0.08447
KIF16B	protein_coding	ENSG00000089177	0.458741	4.36606	8.46088e-09	2.39423e-08
TRMT6	protein_coding	ENSG00000089195	-0.727777	5.97157	1.62412e-16	7.12183e-16
CHGB	protein_coding	ENSG00000089199	-0.468884	2.58493	1.31469e-05	2.93321e-05
PEBP1	protein_coding	ENSG00000089220	-0.141377	7.34885	0.0353934	0.0523339
TBX5	protein_coding	ENSG00000089225	1.14825	-1.81445	0.000345768	0.00067236
BRAP	protein_coding	ENSG00000089234	-0.379585	5.00937	1.54991e-07	4.01685e-07
ERP29	protein_coding	ENSG00000089248	0.220022	7.9667	0.000686164	0.00129062
NOS1	protein_coding	ENSG00000089250	0.109172	2.85884	0.278961	0.340772
FUS	protein_coding	ENSG00000089280	-0.929136	9.24205	3.82182e-43	4.76235e-42
IGBP1	protein_coding	ENSG00000089289	-0.661319	5.34801	2.53391e-22	1.43644e-21
FXYD5	protein_coding	ENSG00000089327	0.0344162	7.01614	0.594882	0.65965
ZNF302	protein_coding	ENSG00000089335	-0.00771202	5.23149	0.915954	0.947136
GRAMD1A	protein_coding	ENSG00000089351	0.592315	5.63945	2.75247e-16	1.1935e-15
HEPH	protein_coding	ENSG00000089472	0.308457	0.732807	0.0723084	0.10095
CDIP1	protein_coding	ENSG00000089486	0.510423	5.17926	1.42457e-12	5.0528e-12
CMTM1	protein_coding	ENSG00000089505	0.468667	3.09256	1.33484e-06	3.23105e-06
KCNH4	protein_coding	ENSG00000089558	0.272205	-1.58657	0.682163	0.741969
GANAB	protein_coding	ENSG00000089597	0.0969536	9.18958	0.131207	0.173295
GMIP	protein_coding	ENSG00000089639	1.96722	2.55924	6.71477e-59	1.34112e-57
RBM41	protein_coding	ENSG00000089682	0.148944	3.84574	0.0804324	0.111101
BIRC5	protein_coding	ENSG00000089685	-0.653244	8.03712	1.50674e-24	9.3659e-24
LAG3	protein_coding	ENSG00000089692	0.311195	1.62796	0.0904249	0.12341
MLF2	protein_coding	ENSG00000089693	-0.522351	8.3077	5.43234e-16	2.32084e-15
OTUB2	protein_coding	ENSG00000089723	-1.25617	3.34684	5.34216e-39	5.7522e-38
DDX24	protein_coding	ENSG00000089737	-0.987821	7.28218	2.46389e-44	3.19074e-43
ZBTB25	protein_coding	ENSG00000089775	0.879933	4.33622	1.77476e-30	1.38884e-29
NECAP1	protein_coding	ENSG00000089818	-0.182762	5.18101	0.0158419	0.0247911
ARHGAP4	protein_coding	ENSG00000089820	1.2372	-0.612693	2.7712e-05	6.00108e-05
ANKRD24	protein_coding	ENSG00000089847	1.28338	1.14942	6.84262e-15	2.76494e-14
DHX32	protein_coding	ENSG00000089876	1.96783	4.1026	3.76698e-116	3.17256e-114
RCOR1	protein_coding	ENSG00000089902	-0.954237	5.98186	3.36234e-45	4.48939e-44
GPATCH2L	protein_coding	ENSG00000089916	0.115833	5.70046	0.0922456	0.125703
LTBP4	protein_coding	ENSG00000090006	1.09474	7.51435	1.92082e-55	3.42971e-54
BLVRB	protein_coding	ENSG00000090013	0.461176	5.60288	1.01835e-11	3.44605e-11
SLC9A1	protein_coding	ENSG00000090020	-0.134793	5.56348	0.0523948	0.0751281
SPTLC1	protein_coding	ENSG00000090054	-0.88556	6.78155	5.99507e-40	6.67606e-39
PAPOLA	protein_coding	ENSG00000090060	-1.20306	7.53182	1.42657e-73	4.306e-72
CCNK	protein_coding	ENSG00000090061	-0.77992	5.75894	9.23905e-29	6.791e-28
PCBP4	protein_coding	ENSG00000090097	0.608414	6.41809	6.8095e-21	3.62717e-20
YPEL3	protein_coding	ENSG00000090238	1.31476	2.79192	5.47336e-35	5.1159e-34
MRPS33	protein_coding	ENSG00000090263	-0.30592	3.58415	0.000414487	0.000799916
NDUFB2	protein_coding	ENSG00000090266	0.201539	4.28451	0.00695512	0.0114729
NUDC	protein_coding	ENSG00000090273	-0.999734	8.28368	4.90528e-52	7.92976e-51
MAEA	protein_coding	ENSG00000090316	-0.197318	5.90446	0.00257231	0.0045035
ICAM1	protein_coding	ENSG00000090339	-0.831961	-0.845322	0.00378431	0.00648451
STRN4	protein_coding	ENSG00000090372	0.232943	6.79906	0.000534029	0.00101757
IRAK3	protein_coding	ENSG00000090376	-0.562348	-3.74352	0.785729	0.835284
MUL1	protein_coding	ENSG00000090432	-0.313557	4.8475	2.6556e-05	5.75799e-05
TFAP4	protein_coding	ENSG00000090447	-1.55865	4.10265	1.52274e-90	7.42475e-89
PDCD7	protein_coding	ENSG00000090470	-0.301117	5.83089	4.06792e-06	9.47164e-06
SPG21	protein_coding	ENSG00000090487	-0.0324963	6.22703	0.614602	0.678097
FETUB	protein_coding	ENSG00000090512	1.22509	-3.0943	0.00817418	0.0133495
DNAJB11	protein_coding	ENSG00000090520	-0.408462	6.60107	3.06041e-10	9.50931e-10
P3H2	protein_coding	ENSG00000090530	1.52508	5.09225	1.23745e-94	6.65322e-93
THPO	protein_coding	ENSG00000090534	1.62043	-0.255658	1.33794e-11	4.50476e-11
CHRD	protein_coding	ENSG00000090539	1.97213	2.98638	1.76927e-77	5.89438e-76
FLT3LG	protein_coding	ENSG00000090554	0.431568	-1.73694	0.57732	0.642488
RAB11FIP3	protein_coding	ENSG00000090565	-0.121587	5.48215	0.0691164	0.0968812
GNPTG	protein_coding	ENSG00000090581	0.0724328	4.84856	0.353076	0.419191
ZNF268	protein_coding	ENSG00000090612	-0.87783	4.25946	4.89457e-25	3.09518e-24
GOLGA3	protein_coding	ENSG00000090615	0.153735	6.5971	0.0158989	0.0248738
PABPC4	protein_coding	ENSG00000090621	-1.03749	8.20001	1.48581e-59	3.0176e-58
CD209	protein_coding	ENSG00000090659	-0.562362	-3.69191	0.785641	0.835264
CERS4	protein_coding	ENSG00000090661	0.290766	2.99665	0.00344356	0.00593284
MCOLN1	protein_coding	ENSG00000090674	0.223284	3.66231	0.0102468	0.0164939
USP48	protein_coding	ENSG00000090686	-0.0849328	5.8772	0.20762	0.261843
EFNB1	protein_coding	ENSG00000090776	-0.920226	5.54623	4.08785e-45	5.434e-44
PDPR	protein_coding	ENSG00000090857	-0.303109	7.549	1.9026e-06	4.55319e-06
AARS	protein_coding	ENSG00000090861	0.308054	7.37135	2.15797e-06	5.14033e-06
GLG1	protein_coding	ENSG00000090863	-0.413944	7.96683	2.98869e-10	9.29726e-10
KIF4A	protein_coding	ENSG00000090889	-0.0729275	7.23607	0.288321	0.351101
TNRC6A	protein_coding	ENSG00000090905	-0.459421	7.08124	1.14274e-12	4.08023e-12
PLEKHG2	protein_coding	ENSG00000090924	0.209056	5.95794	0.00134689	0.00243618
DLL3	protein_coding	ENSG00000090932	0.31623	1.26923	0.0295233	0.044217
NAT14	protein_coding	ENSG00000090971	0.787995	4.03782	4.56914e-21	2.45773e-20
PITPNM2	protein_coding	ENSG00000090975	1.30303	3.95361	7.00765e-46	9.63983e-45
EXOC1	protein_coding	ENSG00000090989	0.0420564	5.88524	0.540689	0.607499
RBM27	protein_coding	ENSG00000091009	-1.059	4.69726	1.4876e-45	2.0187e-44
POU4F3	protein_coding	ENSG00000091010	-0.959661	-1.54754	0.00519258	0.00872994
OSBPL8	protein_coding	ENSG00000091039	-0.695702	6.62858	1.24728e-24	7.77518e-24
DTX2	protein_coding	ENSG00000091073	1.15612	4.61808	1.56172e-50	2.43005e-49
PUS7	protein_coding	ENSG00000091127	-0.744934	5.64262	1.24234e-27	8.73704e-27
NRCAM	protein_coding	ENSG00000091129	1.88175	1.47756	2.09214e-35	1.98399e-34
LAMB1	protein_coding	ENSG00000091136	-0.0912097	8.16676	0.158903	0.205869
SLC26A4	protein_coding	ENSG00000091137	-3.26951	-1.54402	1.69821e-11	5.68201e-11
DLD	protein_coding	ENSG00000091140	-0.648825	6.41371	4.68596e-22	2.62551e-21
WDR7	protein_coding	ENSG00000091157	0.403135	4.40378	4.58036e-07	1.14757e-06
TXNL1	protein_coding	ENSG00000091164	-1.26673	6.35585	3.1446e-84	1.28163e-82
IL5RA	protein_coding	ENSG00000091181	0.717686	-4.21296	0.477207	0.545279
ABCC6	protein_coding	ENSG00000091262	3.21916	0.170181	3.63346e-45	4.84066e-44
CMTM6	protein_coding	ENSG00000091317	-0.44499	7.01873	6.01289e-12	2.06138e-11
ITGA6	protein_coding	ENSG00000091409	-1.02678	8.24841	3.70432e-55	6.54149e-54
RAPGEF4	protein_coding	ENSG00000091428	2.22114	-0.203742	7.83562e-18	3.67263e-17
MAP3K20	protein_coding	ENSG00000091436	0.238786	7.54706	0.000549958	0.00104619
SMPX	protein_coding	ENSG00000091482	0.788855	-3.04733	0.269866	0.330785
FH	protein_coding	ENSG00000091483	-0.317187	6.48172	4.13577e-06	9.62401e-06
SEL1L3	protein_coding	ENSG00000091490	1.48908	6.387	1.95139e-109	1.40728e-107
CDV3	protein_coding	ENSG00000091527	-0.910306	9.10599	3.83813e-39	4.14942e-38
MYO15A	protein_coding	ENSG00000091536	0.135377	-2.90403	0.853837	0.89384
ALKBH5	protein_coding	ENSG00000091542	-0.638749	6.48457	3.33961e-23	1.95388e-22
NLRP1	protein_coding	ENSG00000091592	1.35131	4.12315	4.35053e-63	9.91402e-62
PITPNM3	protein_coding	ENSG00000091622	0.0268836	4.45397	0.744475	0.798475
SPAG7	protein_coding	ENSG00000091640	-0.21076	4.78685	0.00405503	0.00692377
ORC6	protein_coding	ENSG00000091651	0.413692	5.47057	1.44233e-08	4.01727e-08
ZFHX4	protein_coding	ENSG00000091656	0.169321	5.21877	0.0441213	0.064172
CPA1	protein_coding	ENSG00000091704	2.2268	-4.08803	0.0324578	0.0482838
ZC3HC1	protein_coding	ENSG00000091732	-0.230544	3.65107	0.00617221	0.0102644
ESR1	protein_coding	ENSG00000091831	-0.983454	-0.557623	0.00692819	0.0114301
RGS17	protein_coding	ENSG00000091844	-0.526009	2.44743	6.41798e-07	1.59076e-06
ANGPT2	protein_coding	ENSG00000091879	-2.94618	-3.14575	0.0025997	0.00454981
TMEM101	protein_coding	ENSG00000091947	0.482905	4.68658	9.72464e-11	3.11486e-10
CD200	protein_coding	ENSG00000091972	1.16032	1.87192	2.29784e-21	1.24939e-20
CCDC80	protein_coding	ENSG00000091986	-0.733804	7.7721	3.0308e-28	2.17854e-27
PSME1	protein_coding	ENSG00000092010	0.181488	5.39671	0.0130214	0.0206564
PPP2R3C	protein_coding	ENSG00000092020	-0.999005	3.9204	9.05381e-30	6.89687e-29
HAUS4	protein_coding	ENSG00000092036	0.792615	2.7271	2.62318e-15	1.0836e-14
JPH4	protein_coding	ENSG00000092051	0.379467	5.6418	2.55696e-08	6.99721e-08
SLC7A8	protein_coding	ENSG00000092068	-0.533777	1.62334	0.000335944	0.000654049
OSGEP	protein_coding	ENSG00000092094	-0.247197	5.43831	0.00044809	0.000861041
SLC22A17	protein_coding	ENSG00000092096	1.35392	3.98089	6.84585e-54	1.16947e-52
RNF31	protein_coding	ENSG00000092098	0.342796	4.15657	6.81174e-05	0.000141994
SCFD1	protein_coding	ENSG00000092108	-0.587699	5.60858	2.08109e-17	9.55896e-17
G2E3	protein_coding	ENSG00000092140	0.0437664	5.22307	0.560075	0.626505
HECTD1	protein_coding	ENSG00000092148	-0.215584	7.17843	0.00178312	0.00318456
HNRNPC	protein_coding	ENSG00000092199	-1.42792	9.65087	8.4442e-84	3.38993e-82
RPGRIP1	protein_coding	ENSG00000092200	1.66605	-1.80859	1.14713e-05	2.57246e-05
SUPT16H	protein_coding	ENSG00000092201	-0.542914	8.1728	1.07141e-15	4.51252e-15
TOX4	protein_coding	ENSG00000092203	-0.730304	6.23295	2.87973e-29	2.15751e-28
GEMIN2	protein_coding	ENSG00000092208	0.187925	3.56204	0.0317848	0.0473645
TGM1	protein_coding	ENSG00000092295	1.02036	3.49169	7.31531e-28	5.18705e-27
TINF2	protein_coding	ENSG00000092330	0.277008	4.60044	0.000139543	0.000282285
SEMA6A	protein_coding	ENSG00000092421	2.70359	3.10044	1.63976e-148	2.56473e-146
TRPM7	protein_coding	ENSG00000092439	0.00826467	5.54478	0.907323	0.939305
TYRO3	protein_coding	ENSG00000092445	0.00665651	5.2909	0.923235	0.953355
WDR76	protein_coding	ENSG00000092470	-0.421059	4.6965	1.64205e-09	4.88056e-09
SNAP23	protein_coding	ENSG00000092531	-0.352146	6.04739	3.6611e-07	9.2408e-07
TBX15	protein_coding	ENSG00000092607	0.330555	3.44597	0.000144583	0.000291955
PHGDH	protein_coding	ENSG00000092621	0.297985	7.73465	3.766e-06	8.78904e-06
COL9A3	protein_coding	ENSG00000092758	1.64984	-0.966113	1.92991e-05	4.24217e-05
EZR	protein_coding	ENSG00000092820	-1.00058	9.22908	7.25919e-48	1.05206e-46
MYL6	protein_coding	ENSG00000092841	0.2363	6.50666	0.00109239	0.00200109
AGO1	protein_coding	ENSG00000092847	-0.589941	6.98618	3.89703e-19	1.93342e-18
TEKT2	protein_coding	ENSG00000092850	-0.0163794	-3.25104	1	1
CLSPN	protein_coding	ENSG00000092853	0.084742	6.5509	0.239083	0.296998
RFFL	protein_coding	ENSG00000092871	0.416515	3.79701	5.77149e-07	1.43495e-06
UNC13D	protein_coding	ENSG00000092929	0.654686	6.12366	6.06327e-21	3.23755e-20
MFSD11	protein_coding	ENSG00000092931	0.542122	3.77546	3.08732e-10	9.59044e-10
DPYSL2	protein_coding	ENSG00000092964	1.15683	6.20779	8.2038e-61	1.74563e-59
TGFB2	protein_coding	ENSG00000092969	1.3092	7.43508	5.83133e-76	1.85793e-74
GPATCH2	protein_coding	ENSG00000092978	-0.898679	4.57814	2.05125e-31	1.66191e-30
NUP50	protein_coding	ENSG00000093000	-0.725148	7.72726	5.19862e-27	3.56242e-26
CDC45	protein_coding	ENSG00000093009	0.908971	6.36688	9.21074e-42	1.09344e-40
COMT	protein_coding	ENSG00000093010	-0.314005	6.00674	1.95569e-06	4.67282e-06
ADA2	protein_coding	ENSG00000093072	5.5653	-3.30024	0.000765796	0.00143168
AC016026.1	processed_transcript	ENSG00000093100	1.18013	-0.881037	0.00042299	0.000815673
ECHDC1	protein_coding	ENSG00000093144	-0.683115	6.03151	1.27912e-24	7.96955e-24
LRRFIP2	protein_coding	ENSG00000093167	-0.087429	6.32145	0.188795	0.24052
SEC22C	protein_coding	ENSG00000093183	0.382494	5.5947	1.0171e-08	2.86269e-08
XYLB	protein_coding	ENSG00000093217	0.165569	4.09433	0.0347377	0.0514333
HDAC6	protein_coding	ENSG00000094631	-0.0450537	5.77915	0.497457	0.565654
CDC6	protein_coding	ENSG00000094804	0.317399	7.14311	7.25231e-07	1.79184e-06
UPRT	protein_coding	ENSG00000094841	-0.464785	3.30014	9.65571e-07	2.36503e-06
CDC23	protein_coding	ENSG00000094880	-0.0950015	5.72959	0.162248	0.20983
AAAS	protein_coding	ENSG00000094914	-0.249383	5.70036	0.000135888	0.000275354
CBX5	protein_coding	ENSG00000094916	0.85618	7.93217	8.89665e-38	9.17353e-37
SUCO	protein_coding	ENSG00000094975	-0.735924	6.32171	1.01605e-28	7.4524e-28
MSH2	protein_coding	ENSG00000095002	-0.0126148	6.89297	0.850602	0.891488
MAP3K1	protein_coding	ENSG00000095015	0.792301	3.99151	2.10485e-21	1.14679e-20
DHPS	protein_coding	ENSG00000095059	-0.142538	0.96486	0.389761	0.45689
HOOK2	protein_coding	ENSG00000095066	1.02077	4.16365	7.34767e-36	7.10491e-35
ARCN1	protein_coding	ENSG00000095139	-0.433863	7.12605	8.32138e-10	2.51869e-09
EPB41L4B	protein_coding	ENSG00000095203	-0.834875	3.81383	2.20387e-21	1.19911e-20
TMEM38B	protein_coding	ENSG00000095209	-0.13999	4.79789	0.0527034	0.0755186
PSMD5	protein_coding	ENSG00000095261	-0.328572	5.60479	9.75113e-07	2.38816e-06
PTGS1	protein_coding	ENSG00000095303	-0.42695	2.70007	0.00147445	0.00265513
NUP188	protein_coding	ENSG00000095319	-0.355808	7.12293	2.75701e-08	7.5344e-08
CRAT	protein_coding	ENSG00000095321	1.18551	2.0345	3.93412e-21	2.12184e-20
SH2D3C	protein_coding	ENSG00000095370	3.17622	-0.385038	2.7669e-37	2.79791e-36
NANS	protein_coding	ENSG00000095380	-0.198611	6.16835	0.00249869	0.00438163
TBC1D2	protein_coding	ENSG00000095383	1.72361	4.12312	1.56001e-58	3.07748e-57
WHRN	protein_coding	ENSG00000095397	-0.645601	3.26409	2.21809e-11	7.38147e-11
PDE6C	protein_coding	ENSG00000095464	5.47686	-2.30723	8.63147e-13	3.10493e-12
CWF19L1	protein_coding	ENSG00000095485	-0.424004	5.08124	1.2347e-09	3.69627e-09
SEMA4G	protein_coding	ENSG00000095539	1.2056	2.48457	1.5722e-28	1.14444e-27
BTAF1	protein_coding	ENSG00000095564	-0.20362	6.62381	0.00235453	0.00413998
IKZF5	protein_coding	ENSG00000095574	-0.768609	4.39438	1.28145e-24	7.98197e-24
TLL2	protein_coding	ENSG00000095587	1.20038	1.73588	1.11604e-17	5.19161e-17
CYP26A1	protein_coding	ENSG00000095596	6.05903	-3.99331	4.59486e-05	9.74864e-05
SORBS1	protein_coding	ENSG00000095637	0.102287	3.3825	0.295877	0.359141
CRTAC1	protein_coding	ENSG00000095713	1.23267	0.497525	1.28273e-10	4.07827e-10
BAMBI	protein_coding	ENSG00000095739	-0.679205	3.01169	2.56467e-13	9.49512e-13
IL11	protein_coding	ENSG00000095752	-0.689101	6.87358	0.000230189	0.00045578
MYO3A	protein_coding	ENSG00000095777	2.25054	3.17428	1.49326e-107	1.0306e-105
WAC	protein_coding	ENSG00000095787	-0.508664	7.5688	6.02941e-13	2.18589e-12
CREM	protein_coding	ENSG00000095794	-0.466098	4.52822	1.30783e-06	3.1676e-06
NUBP2	protein_coding	ENSG00000095906	0.00469746	5.4556	0.950781	0.978569
SMIM24	protein_coding	ENSG00000095932	-0.0991701	-2.73926	1	1
HIVEP1	protein_coding	ENSG00000095951	-1.92169	5.08341	1.83805e-144	2.66706e-142
TREM2	protein_coding	ENSG00000095970	7.00563	-3.01247	6.43473e-09	1.83511e-08
FKBP5	protein_coding	ENSG00000096060	0.942612	5.98214	1.72534e-38	1.82674e-37
SRPK1	protein_coding	ENSG00000096063	-0.424847	7.15208	1.10725e-10	3.53436e-10
BRPF3	protein_coding	ENSG00000096070	0.364649	6.4874	3.33889e-08	9.07205e-08
MRPS18A	protein_coding	ENSG00000096080	0.0801204	5.56861	0.228538	0.285281
TMEM14A	protein_coding	ENSG00000096092	0.364057	4.6957	6.68138e-07	1.65468e-06
EFHC1	protein_coding	ENSG00000096093	1.57739	5.39159	3.91694e-117	3.34565e-115
HSP90AB1	protein_coding	ENSG00000096384	-1.49503	11.7467	6.98538e-105	4.60978e-103
CDC5L	protein_coding	ENSG00000096401	-0.574104	7.15	6.1461e-17	2.75887e-16
ITPR3	protein_coding	ENSG00000096433	0.804696	6.70652	6.40328e-30	4.91353e-29
ZNF184	protein_coding	ENSG00000096654	-0.17476	3.86583	0.0505252	0.0726741
DSP	protein_coding	ENSG00000096696	0.138791	3.23725	0.202868	0.256369
SIRT1	protein_coding	ENSG00000096717	-0.205605	5.50071	0.00255974	0.00448411
HNRNPH3	protein_coding	ENSG00000096746	-1.56501	8.97092	7.84584e-104	4.99954e-102
IFT74	protein_coding	ENSG00000096872	-0.374445	4.73373	2.14132e-06	5.10168e-06
JAK2	protein_coding	ENSG00000096968	-0.0946893	3.50828	0.304571	0.368561
IL12RB1	protein_coding	ENSG00000096996	4.8099	-3.5064	0.0182142	0.0282702
ABL1	protein_coding	ENSG00000097007	0.140823	7.20852	0.0304132	0.0454472
ACOT7	protein_coding	ENSG00000097021	-0.286751	5.87618	1.14118e-05	2.55983e-05
SH3GLB1	protein_coding	ENSG00000097033	-0.557063	6.41613	1.10767e-16	4.9027e-16
CDC7	protein_coding	ENSG00000097046	0.12975	5.33494	0.0636156	0.0898
SYDE2	protein_coding	ENSG00000097096	0.389556	4.12537	4.08498e-07	1.02709e-06
PCSK5	protein_coding	ENSG00000099139	0.852372	4.70305	1.71211e-28	1.2444e-27
SCD	protein_coding	ENSG00000099194	0.228507	9.65144	0.00124301	0.00225914
TMED1	protein_coding	ENSG00000099203	0.144387	4.77844	0.0517507	0.074286
ABLIM1	protein_coding	ENSG00000099204	0.987103	7.40788	9.32185e-44	1.18177e-42
ERMP1	protein_coding	ENSG00000099219	-0.0154381	4.27369	0.846204	0.887734
RAB18	protein_coding	ENSG00000099246	-0.591098	6.28334	6.21105e-18	2.93229e-17
NRP1	protein_coding	ENSG00000099250	-1.01769	7.1607	2.54062e-55	4.5163e-54
HSD17B7P2	transcribed_unprocessed_pseudogene	ENSG00000099251	2.20491	1.39047	9.57332e-38	9.85018e-37
PRTFDC1	protein_coding	ENSG00000099256	0.820455	3.47515	5.22684e-19	2.58096e-18
PALMD	protein_coding	ENSG00000099260	4.30007	-3.90226	6.20317e-06	1.42247e-05
TSPAN15	protein_coding	ENSG00000099282	0.320756	-1.90035	0.44092	0.50957
H2AFY2	protein_coding	ENSG00000099284	0.795243	5.078	7.67106e-29	5.6644e-28
WASHC2A	protein_coding	ENSG00000099290	-0.396655	6.17889	1.05813e-09	3.18193e-09
MAST3	protein_coding	ENSG00000099308	0.601747	3.54389	7.63753e-11	2.46272e-10
MZF1	protein_coding	ENSG00000099326	-1.40016	3.33053	4.67731e-43	5.81034e-42
OCEL1	protein_coding	ENSG00000099330	1.05397	1.92709	1.3224e-17	6.12789e-17
MYO9B	protein_coding	ENSG00000099331	-0.259766	6.68538	0.000146959	0.000296465
KCNK6	protein_coding	ENSG00000099337	0.191077	4.47474	0.0179459	0.0278844
CATSPERG	protein_coding	ENSG00000099338	0.807152	0.951719	1.46918e-06	3.54555e-06
PSMD8	protein_coding	ENSG00000099341	-0.724967	7.76972	6.4376e-27	4.39644e-26
FBXL19	protein_coding	ENSG00000099364	-0.670172	6.19967	1.37621e-24	8.56114e-24
STX1B	protein_coding	ENSG00000099365	0.686665	2.18162	5.76317e-08	1.54173e-07
HSD3B7	protein_coding	ENSG00000099377	0.0183535	1.50338	0.920541	0.950981
SETD1A	protein_coding	ENSG00000099381	-0.678954	6.15238	4.47113e-23	2.60765e-22
BCL7C	protein_coding	ENSG00000099385	0.10989	6.02016	0.119441	0.159151
MAGEB2	protein_coding	ENSG00000099399	-1.01848	6.31037	4.52975e-56	8.21597e-55
EFNA2	protein_coding	ENSG00000099617	0.40342	1.75573	0.00372172	0.00638315
CIRBP	protein_coding	ENSG00000099622	0.417539	5.94789	5.161e-09	1.4831e-08
ATP5F1D	protein_coding	ENSG00000099624	-0.139335	4.77589	0.0875497	0.119832
CBARP	protein_coding	ENSG00000099625	-0.273129	4.09531	0.00237561	0.00417614
HNRNPM	protein_coding	ENSG00000099783	-1.15127	8.88422	1.10553e-63	2.56047e-62
2019-03-02	protein_coding	ENSG00000099785	0.714761	2.27009	2.62457e-10	8.19841e-10
NDUFB7	protein_coding	ENSG00000099795	-0.275744	4.79188	0.000113164	0.000231156
TECR	protein_coding	ENSG00000099797	0.287775	5.39234	0.000112776	0.00023046
TIMM13	protein_coding	ENSG00000099800	-0.873073	5.19232	2.09967e-35	1.99035e-34
CDC34	protein_coding	ENSG00000099804	-0.136434	5.46715	0.0559548	0.0798119
MTAP	protein_coding	ENSG00000099810	-1.02068	5.96889	1.56118e-47	2.24235e-46
MISP	protein_coding	ENSG00000099812	1.56109	4.92859	3.61481e-91	1.78133e-89
CEP170B	protein_coding	ENSG00000099814	-0.118308	6.8047	0.074904	0.104236
POLR2E	protein_coding	ENSG00000099817	-0.503791	6.60548	1.10195e-14	4.40543e-14
POLRMT	protein_coding	ENSG00000099821	-0.470128	6.01669	2.24603e-12	7.88746e-12
HCN2	protein_coding	ENSG00000099822	0.258792	3.2094	0.00696824	0.011493
CDHR5	protein_coding	ENSG00000099834	1.94417	-3.86688	0.0828813	0.114039
IZUMO4	protein_coding	ENSG00000099840	1.19104	-1.56777	0.00117477	0.00214028
RASSF7	protein_coding	ENSG00000099849	1.63635	3.82366	6.47979e-77	2.11776e-75
GADD45B	protein_coding	ENSG00000099860	0.63473	5.07778	2.30508e-19	1.15672e-18
PALM	protein_coding	ENSG00000099864	0.652964	4.75129	3.04722e-18	1.46008e-17
MADCAM1	protein_coding	ENSG00000099866	1.11611	-0.980535	1.46206e-05	3.24668e-05
IGF2-AS	antisense	ENSG00000099869	2.17905	-2.60727	0.000168878	0.000339093
MKNK2	protein_coding	ENSG00000099875	-0.447942	6.0924	5.45031e-12	1.87384e-11
ARVCF	protein_coding	ENSG00000099889	2.58013	5.54328	2.99046e-272	2.88125e-269
TRMT2A	protein_coding	ENSG00000099899	0.372587	5.08017	2.74758e-07	7.00624e-07
RANBP1	protein_coding	ENSG00000099901	-0.659693	8.72501	9.91712e-23	5.70104e-22
ZDHHC8	protein_coding	ENSG00000099904	0.159945	6.57163	0.042084	0.0614202
KLHL22	protein_coding	ENSG00000099910	2.64902	3.58082	1.23792e-154	2.20872e-152
MED15	protein_coding	ENSG00000099917	0.302129	7.17107	2.2779e-05	4.97578e-05
SERPIND1	protein_coding	ENSG00000099937	-3.53913	-1.43286	3.27461e-07	8.3027e-07
SNAP29	protein_coding	ENSG00000099940	0.140993	6.57343	0.0299097	0.0447504
CRKL	protein_coding	ENSG00000099942	-0.503582	7.78724	1.8059e-15	7.52702e-15
LZTR1	protein_coding	ENSG00000099949	0.618382	4.09301	1.74022e-11	5.82015e-11
MMP11	protein_coding	ENSG00000099953	2.11585	-3.63231	0.000405998	0.000784476
CECR2	protein_coding	ENSG00000099954	-0.798023	4.63465	9.11897e-27	6.18554e-26
SMARCB1	protein_coding	ENSG00000099956	-0.615903	7.23116	4.6071e-22	2.58253e-21
P2RX6	protein_coding	ENSG00000099957	2.02345	1.36253	2.91483e-33	2.54742e-32
BCL2L13	protein_coding	ENSG00000099968	-0.0795599	5.71124	0.241834	0.300059
DDTL	protein_coding	ENSG00000099974	0.708983	0.140227	0.000251906	0.000497106
DDT	protein_coding	ENSG00000099977	-0.640169	-3.38703	0.279016	0.340821
GSTT2	polymorphic_pseudogene	ENSG00000099984	1.84797	-0.358407	1.61274e-11	5.4013e-11
OSM	protein_coding	ENSG00000099985	-0.78977	-4.09023	0.738238	0.792917
CABIN1	protein_coding	ENSG00000099991	-0.175229	7.2061	0.00705404	0.0116221
TBC1D10A	protein_coding	ENSG00000099992	0.239102	3.60453	0.00716621	0.0117945
SUSD2	protein_coding	ENSG00000099994	1.38125	1.36949	4.67001e-17	2.11044e-16
SF3A1	protein_coding	ENSG00000099995	-0.815119	7.45721	3.43943e-37	3.46344e-36
GGT5	protein_coding	ENSG00000099998	1.90855	-2.31419	0.000559412	0.00106275
RNF215	protein_coding	ENSG00000099999	1.39242	4.51113	1.07988e-54	1.89171e-53
SEC14L2	protein_coding	ENSG00000100003	0.20329	3.49834	0.0207637	0.0319269
SEC14L3	protein_coding	ENSG00000100012	0.963082	-2.66383	0.050902	0.0731637
SPECC1L	protein_coding	ENSG00000100014	0.830087	5.59125	2.63367e-34	2.39838e-33
PPIL2	protein_coding	ENSG00000100023	0.377975	6.39839	6.85273e-09	1.95062e-08
UPB1	protein_coding	ENSG00000100024	3.09769	-2.57717	5.69127e-07	1.41574e-06
YPEL1	protein_coding	ENSG00000100027	2.09203	1.4186	1.02594e-44	1.34669e-43
SNRPD3	protein_coding	ENSG00000100028	-0.694124	8.05506	6.64174e-16	2.82799e-15
PES1	protein_coding	ENSG00000100029	-1.35352	7.78226	2.18541e-87	9.83925e-86
MAPK1	protein_coding	ENSG00000100030	-0.369766	7.75603	7.29679e-09	2.07335e-08
GGT1	protein_coding	ENSG00000100031	1.817	3.96155	6.13832e-53	1.01633e-51
PPM1F	protein_coding	ENSG00000100034	-0.174385	6.74609	0.00811509	0.0132629
SLC35E4	protein_coding	ENSG00000100036	-1.33442	5.06013	4.1621e-81	1.52359e-79
TOP3B	protein_coding	ENSG00000100038	0.675306	5.47239	1.70923e-23	1.01205e-22
CRYBB3	protein_coding	ENSG00000100053	1.54925	0.119655	7.49963e-12	2.55833e-11
CYTH4	protein_coding	ENSG00000100055	-1.66696	1.04156	1.21624e-17	5.64461e-17
ESS2	protein_coding	ENSG00000100056	-0.405227	4.86086	1.2967e-08	3.62296e-08
CRYBB2P1	transcribed_unprocessed_pseudogene	ENSG00000100058	-0.493342	5.60521	4.12076e-13	1.50984e-12
MFNG	protein_coding	ENSG00000100060	1.82864	2.71289	4.36768e-42	5.23144e-41
CARD10	protein_coding	ENSG00000100065	0.174315	6.57936	0.0101177	0.0162949
LRP5L	protein_coding	ENSG00000100068	-1.22227	3.84004	2.26005e-33	1.98461e-32
SLC25A1	protein_coding	ENSG00000100075	0.82674	5.93395	4.85067e-34	4.36941e-33
GRK3	protein_coding	ENSG00000100077	-0.318457	6.4161	7.72733e-07	1.90549e-06
PLA2G3	protein_coding	ENSG00000100078	1.92818	-3.55254	0.0303113	0.0453202
GGA1	protein_coding	ENSG00000100083	0.259872	5.80789	0.000160245	0.000322188
HIRA	protein_coding	ENSG00000100084	-0.936573	4.09589	1.15402e-30	9.08097e-30
SH3BP1	protein_coding	ENSG00000100092	-0.172649	2.52357	0.115917	0.154884
SEZ6L	protein_coding	ENSG00000100095	0.668287	-1.69263	0.0912166	0.124392
LGALS1	protein_coding	ENSG00000100097	-0.234926	9.07689	0.000913031	0.00168885
HPS4	protein_coding	ENSG00000100099	0.590782	7.84548	9.10781e-21	4.83109e-20
[truncated: 22,088 more rows]

## Sheet: G1S_vs_S
gene_names	bio_type	ensemble_id	logFC	logCPM	PValue	FDR
TSPAN6	protein_coding	ENSG00000000003	0.0208389	5.2183	0.767575	0.849035
DPM1	protein_coding	ENSG00000000419	0.434366	6.761	1.91843e-06	1.01917e-05
SCYL3	protein_coding	ENSG00000000457	0.0605391	2.54455	0.547189	0.664355
C1orf112	protein_coding	ENSG00000000460	-0.451101	4.61937	1.37606e-09	1.11637e-08
CFH	protein_coding	ENSG00000000971	-0.160586	0.477974	0.315433	0.436884
FUCA2	protein_coding	ENSG00000001036	-0.0191926	6.77687	0.758554	0.841957
GCLC	protein_coding	ENSG00000001084	-0.0739719	5.70717	0.278518	0.396317
NFYA	protein_coding	ENSG00000001167	0.244093	6.75872	0.000270333	0.000968974
STPG1	protein_coding	ENSG00000001460	-0.607495	3.31765	2.12948e-11	2.10302e-10
NIPAL3	protein_coding	ENSG00000001461	-0.362076	4.65734	1.80763e-07	1.11642e-06
LAS1L	protein_coding	ENSG00000001497	-0.00852807	6.81317	0.906768	0.951319
ENPP4	protein_coding	ENSG00000001561	-0.227339	4.3141	0.00174436	0.00521101
SEMA3F	protein_coding	ENSG00000001617	0.433364	5.55522	1.73834e-10	1.55309e-09
ANKIB1	protein_coding	ENSG00000001629	-0.160242	6.66289	0.0171216	0.0390648
CYP51A1	protein_coding	ENSG00000001630	-0.222595	2.93936	0.0613741	0.115449
KRIT1	protein_coding	ENSG00000001631	-0.153533	2.6312	0.150521	0.242933
RAD52	protein_coding	ENSG00000002016	-0.897361	3.7071	2.29289e-22	5.54507e-21
MYH16	transcribed_unitary_pseudogene	ENSG00000002079	0.234463	3.17598	0.019271	0.0432963
BAD	protein_coding	ENSG00000002330	-0.385586	4.97248	1.71745e-07	1.06482e-06
LAP3	protein_coding	ENSG00000002549	0.15677	6.18588	0.0231029	0.0504422
CD99	protein_coding	ENSG00000002586	-0.0559777	5.87907	0.388871	0.514966
AOC1	protein_coding	ENSG00000002726	0.461989	-4.06735	0.632394	0.739082
HECW1	protein_coding	ENSG00000002746	-0.513855	1.58204	2.61083e-05	0.000113928
MAD1L1	protein_coding	ENSG00000002822	0.0898486	6.56147	0.159343	0.254515
LASP1	protein_coding	ENSG00000002834	0.171073	9.40078	0.00910826	0.022592
SNX11	protein_coding	ENSG00000002919	0.0537418	3.98236	0.500131	0.621411
TMEM176A	protein_coding	ENSG00000002933	0.276705	-0.433026	0.257927	0.373561
M6PR	protein_coding	ENSG00000003056	0.191565	8.0521	0.00381956	0.01045
KLHL13	protein_coding	ENSG00000003096	-0.467562	2.30993	4.11771e-06	2.07107e-05
CYP26B1	protein_coding	ENSG00000003137	-0.301783	5.0286	6.59395e-06	3.20461e-05
ICA1	protein_coding	ENSG00000003147	-0.397033	0.247671	0.0230546	0.0503596
DBNDD1	protein_coding	ENSG00000003249	-0.203658	3.42513	0.0239454	0.0520898
ALS2	protein_coding	ENSG00000003393	0.0865493	5.95281	0.192286	0.295934
CASP10	protein_coding	ENSG00000003400	-0.839721	0.358882	1.37949e-07	8.68247e-07
CFLAR	protein_coding	ENSG00000003402	0.0209179	5.1603	0.754017	0.838369
TFPI	protein_coding	ENSG00000003436	0.144585	5.40839	0.0333294	0.0691657
NDUFAF7	protein_coding	ENSG00000003509	-0.283144	5.10878	7.99779e-05	0.000319633
RBM5	protein_coding	ENSG00000003756	-0.211889	6.15735	0.000986609	0.00312772
MTMR7	protein_coding	ENSG00000003987	1.93981	-1.79255	2.58896e-07	1.56135e-06
SLC7A2	protein_coding	ENSG00000003989	-0.347685	5.86518	8.58229e-08	5.56002e-07
ARF5	protein_coding	ENSG00000004059	0.0266126	5.31567	0.689324	0.787337
SARM1	protein_coding	ENSG00000004139	1.01673	1.28884	5.55538e-11	5.25167e-10
POLDIP2	protein_coding	ENSG00000004142	-0.0113467	7.00228	0.861411	0.920941
PLXND1	protein_coding	ENSG00000004399	0.618371	6.87516	4.14687e-18	7.45416e-17
AK2	protein_coding	ENSG00000004455	0.0752843	7.68593	0.243406	0.357168
FKBP4	protein_coding	ENSG00000004478	0.0241434	8.87506	0.704537	0.799688
KDM1A	protein_coding	ENSG00000004487	-0.176949	7.32299	0.00583767	0.0152145
RBM6	protein_coding	ENSG00000004534	0.232841	7.0764	0.000325248	0.00114553
CAMKK1	protein_coding	ENSG00000004660	0.929343	4.50503	6.52107e-37	3.26555e-35
RECQL	protein_coding	ENSG00000004700	0.254767	7.18237	0.000193441	0.000715183
VPS50	protein_coding	ENSG00000004766	-0.520534	3.93915	1.72262e-10	1.54076e-09
HSPB6	protein_coding	ENSG00000004776	-0.11007	-1.09869	0.777723	0.856282
ARHGAP33	protein_coding	ENSG00000004777	-0.77432	3.60313	4.25402e-16	6.48522e-15
NDUFAB1	protein_coding	ENSG00000004779	-0.0761099	5.31689	0.29513	0.414846
PDK4	protein_coding	ENSG00000004799	1.17702	-0.338028	3.41429e-07	2.02811e-06
SLC22A16	protein_coding	ENSG00000004809	0.644161	-3.76027	0.764749	0.846891
ZMYND10	protein_coding	ENSG00000004838	-0.297338	0.476613	0.085686	0.152443
ABCB5	protein_coding	ENSG00000004846	-1.00976	-1.98398	0.00309334	0.0086861
ARX	protein_coding	ENSG00000004848	0.0448463	-3.62166	1	1
SLC25A13	protein_coding	ENSG00000004864	-0.113907	5.77292	0.0931048	0.163014
ST7	protein_coding	ENSG00000004866	-0.0377187	4.25641	0.651172	0.755311
CDC27	protein_coding	ENSG00000004897	0.2038	7.44439	0.00293556	0.00828553
CALCR	protein_coding	ENSG00000004948	1.48436	-2.20808	0.000709717	0.00231326
HCCS	protein_coding	ENSG00000004961	0.0205612	4.52653	0.77051	0.851161
DVL2	protein_coding	ENSG00000004975	-0.635075	4.72456	7.12277e-20	1.45149e-18
PRSS22	protein_coding	ENSG00000005001	2.75874	-3.42912	3.79592e-05	0.000160746
UPF1	protein_coding	ENSG00000005007	0.0970757	6.82704	0.129247	0.2142
SKAP2	protein_coding	ENSG00000005020	-0.00371797	-2.89732	1	1
SLC25A5	protein_coding	ENSG00000005022	-0.0222887	8.01535	0.725121	0.816359
MCUB	protein_coding	ENSG00000005059	-0.182822	3.78253	0.0232134	0.0506698
HOXA11	protein_coding	ENSG00000005073	0.153934	3.85176	0.0556415	0.106323
POLR2J	protein_coding	ENSG00000005075	-0.212542	5.75969	0.00167087	0.00501135
DHX33	protein_coding	ENSG00000005100	0.474932	6.30048	8.05184e-13	9.09258e-12
MEOX1	protein_coding	ENSG00000005102	1.65902	-0.870242	3.1465e-08	2.15679e-07
THSD7A	protein_coding	ENSG00000005108	-1.14791	-2.42918	0.00131241	0.0040378
LIG3	protein_coding	ENSG00000005156	0.119083	5.69144	0.0826795	0.147869
RPAP3	protein_coding	ENSG00000005175	0.0391694	6.43705	0.567916	0.683354
ACSM3	protein_coding	ENSG00000005187	-1.12562	0.490349	5.44832e-11	5.15248e-10
REXO5	protein_coding	ENSG00000005189	-0.0152419	3.13622	0.864891	0.923391
CIAPIN1	protein_coding	ENSG00000005194	-0.149856	5.18094	0.0337526	0.0698933
SPPL2B	protein_coding	ENSG00000005206	-0.294222	3.9836	0.115018	0.19458
FAM214B	protein_coding	ENSG00000005238	-0.500422	5.3741	3.24591e-14	4.18322e-13
COPZ2	protein_coding	ENSG00000005243	-0.206208	2.92543	0.0241586	0.0524714
PRKAR2B	protein_coding	ENSG00000005249	-0.0663024	4.99366	0.36042	0.484861
MSL3	protein_coding	ENSG00000005302	-0.00863442	5.25838	0.905287	0.950054
CREBBP	protein_coding	ENSG00000005339	0.0488924	7.54064	0.488249	0.610532
TSPOAP1	protein_coding	ENSG00000005379	0.747959	0.25538	3.14845e-05	0.000135519
MPO	protein_coding	ENSG00000005381	5.55885	-1.43448	4.1493e-30	1.5166e-28
GCFC2	protein_coding	ENSG00000005436	-0.279689	4.42677	0.000566418	0.0018873
WDR54	protein_coding	ENSG00000005448	-0.147319	4.71108	0.0415383	0.0834514
CROT	protein_coding	ENSG00000005469	-0.707633	2.59327	4.97105e-13	5.72086e-12
ABCB4	protein_coding	ENSG00000005471	-0.0249775	2.25998	0.832081	0.899081
KMT2E	protein_coding	ENSG00000005483	-0.568042	5.87571	4.44433e-16	6.75825e-15
RHBDD2	protein_coding	ENSG00000005486	0.100381	5.7744	0.165531	0.262467
SOX8	protein_coding	ENSG00000005513	2.17941	2.09253	1.02163e-77	1.87847e-75
IBTK	protein_coding	ENSG00000005700	-0.0512185	5.63251	0.459359	0.583206
ZNF195	protein_coding	ENSG00000005801	0.285248	5.08469	3.63089e-05	0.000154327
MYCBP2	protein_coding	ENSG00000005810	-0.228464	6.18051	0.00451604	0.0121228
FBXL3	protein_coding	ENSG00000005812	0.0514984	5.19622	0.451365	0.575509
PDK2	protein_coding	ENSG00000005882	-0.287396	4.677	7.14247e-05	0.000288175
ITGA3	protein_coding	ENSG00000005884	0.516476	9.70144	1.61353e-15	2.33564e-14
ZFX	protein_coding	ENSG00000005889	0.438747	4.53295	8.69888e-09	6.43519e-08
LAMP2	protein_coding	ENSG00000005893	0.151744	7.39214	0.0158028	0.0364635
ITGA2B	protein_coding	ENSG00000005961	-0.806742	-1.10513	0.00115363	0.00359848
ASB4	protein_coding	ENSG00000005981	1.2659	-2.62949	0.00912384	0.022626
GDE1	protein_coding	ENSG00000006007	-0.219324	6.15075	0.000672444	0.0022031
REX1BD	protein_coding	ENSG00000006015	-0.188218	4.14546	0.017512	0.0398162
CRLF1	protein_coding	ENSG00000006016	0.581044	2.58653	1.62478e-06	8.72017e-06
OSBPL7	protein_coding	ENSG00000006025	-0.136259	3.68297	0.155517	0.249463
TMEM98	protein_coding	ENSG00000006042	0.0539283	6.03336	0.412227	0.537623
YBX2	protein_coding	ENSG00000006047	-0.117914	2.91733	0.228049	0.338949
KRT33A	protein_coding	ENSG00000006059	3.61422	-2.6558	7.82266e-11	7.29197e-10
MAP3K14	protein_coding	ENSG00000006062	0.590227	5.06633	2.03049e-14	2.67551e-13
ABCC8	protein_coding	ENSG00000006071	-0.400697	0.837843	0.00328939	0.00916076
TMEM132A	protein_coding	ENSG00000006118	0.141216	6.40153	0.0457899	0.0905907
AP2B1	protein_coding	ENSG00000006125	-0.0768018	8.18075	0.247268	0.361624
TAC1	protein_coding	ENSG00000006128	0.827232	-3.48987	0.359529	0.483851
ZNF263	protein_coding	ENSG00000006194	0.289504	5.78633	1.52924e-05	6.95971e-05
CX3CL1	protein_coding	ENSG00000006210	0.413686	3.53064	3.06927e-06	1.57733e-05
SPATA20	protein_coding	ENSG00000006282	-0.0992538	6.25095	0.121336	0.203468
CACNA1G	protein_coding	ENSG00000006283	0.370311	3.21936	0.0380744	0.077438
TNFRSF12A	protein_coding	ENSG00000006327	0.981151	7.59992	4.87386e-45	3.19013e-43
MAP3K9	protein_coding	ENSG00000006432	-0.379936	6.03949	1.34359e-08	9.68665e-08
RALA	protein_coding	ENSG00000006451	0.126489	6.43652	0.0689168	0.127155
BAIAP2L1	protein_coding	ENSG00000006453	-0.106667	5.55052	0.124111	0.207183
KDM7A	protein_coding	ENSG00000006459	0.844146	4.08819	2.16738e-15	3.09642e-14
ETV1	protein_coding	ENSG00000006468	-0.220208	1.65894	0.0889115	0.157033
AGK	protein_coding	ENSG00000006530	0.0312149	4.83895	0.65132	0.755409
ALDH3B1	protein_coding	ENSG00000006534	-0.30898	4.72913	2.01667e-05	8.97387e-05
PHTF2	protein_coding	ENSG00000006576	-0.136396	6.73262	0.0384195	0.0780608
CCL26	protein_coding	ENSG00000006606	-0.0721251	2.10463	0.513605	0.633629
FARP2	protein_coding	ENSG00000006607	0.255354	5.90204	0.000145576	0.000552289
USH1C	protein_coding	ENSG00000006611	-0.263762	-0.215744	0.152014	0.244905
GGCT	protein_coding	ENSG00000006625	-0.206028	4.03598	0.0471737	0.0928176
DBF4	protein_coding	ENSG00000006634	0.0131802	6.4827	0.85497	0.916432
TBXA2R	protein_coding	ENSG00000006638	-0.487109	0.245965	0.00538528	0.014161
IFRD1	protein_coding	ENSG00000006652	0.102466	5.47057	0.138353	0.226655
COX10	protein_coding	ENSG00000006695	0.140495	3.91915	0.0977703	0.169999
GTF2IRD1	protein_coding	ENSG00000006704	0.0947539	5.26476	0.159028	0.254158
PAF1	protein_coding	ENSG00000006712	-0.0284547	7.06347	0.680879	0.779965
VPS41	protein_coding	ENSG00000006715	-0.15832	6.01133	0.0173907	0.0395814
ARHGAP44	protein_coding	ENSG00000006740	-0.653343	2.67151	7.9818e-12	8.21263e-11
ELAC2	protein_coding	ENSG00000006744	0.127709	6.31711	0.0492775	0.0962572
SCIN	protein_coding	ENSG00000006747	-0.253148	-0.260651	0.188026	0.290935
ARSD	protein_coding	ENSG00000006756	-0.542152	-3.08388	0.287124	0.406009
PNPLA4	protein_coding	ENSG00000006757	0.109085	2.58947	0.301259	0.421909
ADIPOR2	protein_coding	ENSG00000006831	0.188953	7.75287	0.00469481	0.0125495
CDKL3	protein_coding	ENSG00000006837	0.0179205	0.518837	0.896803	0.944773
UPP2	protein_coding	ENSG00000007001	-0.862598	-2.98036	0.100055	0.173333
MARK4	protein_coding	ENSG00000007047	0.225062	5.07643	0.0010238	0.00323158
PROM1	protein_coding	ENSG00000007062	0.770269	-3.58857	0.348481	0.47233
CCDC124	protein_coding	ENSG00000007080	-0.131375	6.30495	0.0607825	0.114524
CEACAM21	protein_coding	ENSG00000007129	0.0444227	-3.38272	1	1
PAFAH1B1	protein_coding	ENSG00000007168	-0.0343341	6.08714	0.598189	0.709607
NOS2	protein_coding	ENSG00000007171	-1.04207	1.41939	5.8481e-17	9.59982e-16
DNAH9	protein_coding	ENSG00000007174	-0.0633673	-3.58376	1	1
KIAA0100	protein_coding	ENSG00000007202	0.0637458	8.64592	0.337908	0.460753
SLC13A2	protein_coding	ENSG00000007216	8.42304	-2.53722	1.94556e-16	3.04106e-15
GAS7	protein_coding	ENSG00000007237	-0.338796	2.8222	0.000518513	0.00174311
TRAPPC6A	protein_coding	ENSG00000007255	0.0618939	1.45561	0.642594	0.748134
MATK	protein_coding	ENSG00000007264	0.201784	-0.00383931	0.297076	0.41707
SCN4A	protein_coding	ENSG00000007314	0.876939	0.52873	7.06138e-06	3.41541e-05
ST7L	protein_coding	ENSG00000007341	-0.106752	4.59966	0.170464	0.268785
TKTL1	protein_coding	ENSG00000007350	1.55579	-3.61861	0.0358534	0.073548
RPUSD1	protein_coding	ENSG00000007376	0.0820979	5.19031	0.27905	0.396829
RHBDF1	protein_coding	ENSG00000007384	-0.157025	5.02066	0.0266719	0.0571673
LUC7L	protein_coding	ENSG00000007392	-0.0557826	5.65094	0.415928	0.541599
CACNA2D2	protein_coding	ENSG00000007402	0.0469759	1.58936	0.709512	0.804122
BAIAP3	protein_coding	ENSG00000007516	-0.301735	2.13494	0.00594124	0.0154359
TSR3	protein_coding	ENSG00000007520	-0.020697	5.94947	0.765908	0.847736
PIGQ	protein_coding	ENSG00000007541	-0.249294	4.02233	0.00312236	0.00875534
CRAMP1	protein_coding	ENSG00000007545	0.241882	4.61885	0.00125238	0.0038724
TEAD3	protein_coding	ENSG00000007866	0.0886844	5.58917	0.175679	0.275548
DNAJC11	protein_coding	ENSG00000007923	0.0875667	5.88686	0.181178	0.282535
MYLIP	protein_coding	ENSG00000007944	0.146401	3.52973	0.110579	0.188221
E2F2	protein_coding	ENSG00000007968	-1.29453	3.79886	1.89293e-54	1.75366e-52
PSMB1	protein_coding	ENSG00000008018	-0.0353883	7.23636	0.60903	0.719045
SYN1	protein_coding	ENSG00000008056	2.00315	2.22943	4.88263e-64	6.15749e-62
JARID2	protein_coding	ENSG00000008083	0.576694	5.74578	1.43099e-16	2.26765e-15
CDKL5	protein_coding	ENSG00000008086	0.159152	3.4944	0.0679092	0.125603
CAMK1G	protein_coding	ENSG00000008118	-0.559645	-3.00617	0.198282	0.303354
CDK11A	protein_coding	ENSG00000008128	0.0969641	-1.23689	0.818183	0.888112
NADK	protein_coding	ENSG00000008130	-0.100494	4.87398	0.165597	0.262538
DLEC1	protein_coding	ENSG00000008226	0.81989	-3.42773	0.154832	0.248547
CYTH3	protein_coding	ENSG00000008256	-0.0964779	7.81501	0.13427	0.221125
ADAM22	protein_coding	ENSG00000008277	-0.206674	2.90196	0.0294942	0.0624098
SYPL1	protein_coding	ENSG00000008282	0.114339	6.72751	0.0827671	0.148015
CYB561	protein_coding	ENSG00000008283	-0.165507	5.82257	0.0110754	0.0267872
SPAG9	protein_coding	ENSG00000008294	0.456105	7.30539	4.53974e-12	4.79389e-11
CELSR3	protein_coding	ENSG00000008300	-0.165199	5.49078	0.0188801	0.0425492
AASS	protein_coding	ENSG00000008311	-0.0641777	4.04107	0.399549	0.525353
SS18L2	protein_coding	ENSG00000008324	0.141791	3.70079	0.103651	0.178494
MPND	protein_coding	ENSG00000008382	-0.29831	2.21171	0.00835589	0.0209393
MGST1	protein_coding	ENSG00000008394	-0.181934	4.0271	0.0210328	0.046594
CRY1	protein_coding	ENSG00000008405	-0.431584	5.76516	7.17152e-11	6.70316e-10
NFIX	protein_coding	ENSG00000008441	0.00836294	5.92758	0.897217	0.945085
ST3GAL1	protein_coding	ENSG00000008513	0.390892	7.54044	9.08145e-09	6.69559e-08
MMP25	protein_coding	ENSG00000008516	1.67353	0.325827	3.68295e-16	5.63603e-15
IL32	protein_coding	ENSG00000008517	0.812872	3.96747	3.05241e-23	7.79677e-22
PKD1	protein_coding	ENSG00000008710	-0.102112	6.34893	0.143795	0.233979
MAPK8IP2	protein_coding	ENSG00000008735	0.966286	-1.06613	0.000581572	0.00193165
MED24	protein_coding	ENSG00000008838	-0.0454458	5.60908	0.49591	0.617663
RHOBTB2	protein_coding	ENSG00000008853	-0.196868	5.39111	0.00437702	0.0117772
HEATR5B	protein_coding	ENSG00000008869	-0.274734	5.11706	4.17551e-05	0.000175188
SEC62	protein_coding	ENSG00000008952	0.365175	7.19744	1.5412e-08	1.10157e-07
RPS20	protein_coding	ENSG00000008988	-0.0644601	9.09923	0.366711	0.491483
CSDE1	protein_coding	ENSG00000009307	-0.0317548	10.0499	0.640394	0.746193
UBE3C	protein_coding	ENSG00000009335	0.0602113	5.76686	0.374921	0.500206
REV3L	protein_coding	ENSG00000009413	-0.752512	5.25113	2.71512e-22	6.51386e-21
TENM1	protein_coding	ENSG00000009694	-0.134966	-0.531615	0.545559	0.662829
PAX7	protein_coding	ENSG00000009709	-0.573052	2.81771	3.85805e-09	2.98519e-08
MASP2	protein_coding	ENSG00000009724	-0.285116	-2.89608	0.773567	0.853273
IYD	protein_coding	ENSG00000009765	0.913832	-3.34163	0.0859239	0.152775
FAM76A	protein_coding	ENSG00000009780	0.172236	2.23102	0.106009	0.181816
TRAF3IP3	protein_coding	ENSG00000009790	1.09942	-3.76599	0.242768	0.356405
POMT2	protein_coding	ENSG00000009830	-0.06616	6.05849	0.311578	0.432713
VTA1	protein_coding	ENSG00000009844	0.0770474	6.66543	0.268605	0.385525
MLXIPL	protein_coding	ENSG00000009950	-0.515672	-2.04446	0.0994544	0.172404
BAZ1B	protein_coding	ENSG00000009954	-0.0552813	7.97967	0.403	0.528622
RANBP9	protein_coding	ENSG00000010017	-0.114904	5.46498	0.0935031	0.163619
ETV7	protein_coding	ENSG00000010030	3.84846	0.713713	5.3043e-82	1.10142e-79
SPRTN	protein_coding	ENSG00000010072	-0.102186	4.87826	0.155355	0.249269
METTL13	protein_coding	ENSG00000010165	0.506716	6.02527	2.96083e-14	3.82195e-13
DYRK4	protein_coding	ENSG00000010219	-0.196636	3.96655	0.0144448	0.0336883
ZNF207	protein_coding	ENSG00000010244	-0.337602	7.37053	9.54458e-08	6.15365e-07
UQCRC1	protein_coding	ENSG00000010256	-0.0809724	7.15398	0.20399	0.309981
STARD3NL	protein_coding	ENSG00000010270	0.0292989	6.0821	0.656144	0.759542
CD9	protein_coding	ENSG00000010278	0.302096	7.38984	8.775e-06	4.17467e-05
NCAPD2	protein_coding	ENSG00000010292	-0.104759	8.66313	0.123749	0.206781
IFFO1	protein_coding	ENSG00000010295	0.178447	2.1225	0.106719	0.1828
GIPR	protein_coding	ENSG00000010310	1.04796	0.225825	1.10105e-07	7.04034e-07
PHF7	protein_coding	ENSG00000010318	-0.529424	3.15796	3.96416e-09	3.06041e-08
SEMA3G	protein_coding	ENSG00000010319	-0.237366	3.34781	0.00700517	0.0178952
NISCH	protein_coding	ENSG00000010322	-0.318946	6.26182	1.34404e-06	7.3145e-06
FUZ	protein_coding	ENSG00000010361	-0.192875	2.73921	0.0504868	0.0982352
SLC6A13	protein_coding	ENSG00000010379	0.2779	-0.797951	0.25541	0.370561
IDS	protein_coding	ENSG00000010404	0.188251	6.86268	0.0035494	0.00980664
ZNF200	protein_coding	ENSG00000010539	0.347249	4.64488	1.92536e-06	1.02218e-05
CD4	protein_coding	ENSG00000010610	-0.37498	-3.13694	0.456656	0.580784
LRRC23	protein_coding	ENSG00000010626	-0.252186	3.72583	0.00214453	0.00625106
BTK	protein_coding	ENSG00000010671	-0.287297	-2.64271	0.780443	0.858498
SCMH1	protein_coding	ENSG00000010803	-0.283657	5.18525	5.58425e-05	0.000229144
FYN	protein_coding	ENSG00000010810	-0.0313398	4.82668	0.668229	0.769133
HIVEP2	protein_coding	ENSG00000010818	0.2926	5.87888	4.6252e-05	0.000192813
ELOA	protein_coding	ENSG00000011007	0.455038	7.29971	3.54908e-12	3.79435e-11
LYPLA2	protein_coding	ENSG00000011009	0.110577	5.5781	0.11459	0.193996
CLCN6	protein_coding	ENSG00000011021	-0.531189	5.34485	1.98345e-14	2.6207e-13
MRC2	protein_coding	ENSG00000011028	0.393399	8.97056	2.87216e-09	2.25698e-08
TSPAN9	protein_coding	ENSG00000011105	0.423585	5.60752	8.97163e-10	7.44915e-09
BTBD7	protein_coding	ENSG00000011114	-0.0515853	5.50461	0.462214	0.585811
APBA3	protein_coding	ENSG00000011132	-0.237474	3.54699	0.00543423	0.0142788
MKS1	protein_coding	ENSG00000011143	-0.178622	4.38702	0.0205933	0.0457707
ABHD5	protein_coding	ENSG00000011198	0.0377627	4.67815	0.604085	0.714771
ANOS1	protein_coding	ENSG00000011201	0.172198	6.33957	0.00746216	0.0189341
AKAP8L	protein_coding	ENSG00000011243	-0.256954	5.70055	0.000109172	0.000424407
MBTD1	protein_coding	ENSG00000011258	0.313338	4.28751	8.48268e-05	0.000337444
UTP18	protein_coding	ENSG00000011260	-0.0200145	6.06744	0.780417	0.858498
RNF216	protein_coding	ENSG00000011275	0.275275	7.48774	1.60818e-05	7.28591e-05
TTC19	protein_coding	ENSG00000011295	0.158583	4.32135	0.0438125	0.0873241
PTBP1	protein_coding	ENSG00000011304	0.113155	8.77902	0.0743268	0.135373
DPF1	protein_coding	ENSG00000011332	-0.0358074	2.86281	0.723774	0.815338
SYT7	protein_coding	ENSG00000011347	0.389455	2.56206	0.000338044	0.00118574
LARS2	protein_coding	ENSG00000011376	-0.0692977	5.38989	0.318499	0.440168
PIK3C2A	protein_coding	ENSG00000011405	-0.0663354	7.05044	0.306808	0.427741
PLAUR	protein_coding	ENSG00000011422	1.2116	7.14705	9.44903e-66	1.27865e-63
ANLN	protein_coding	ENSG00000011426	-0.037797	9.29964	0.584842	0.698383
WIZ	protein_coding	ENSG00000011451	-0.0188257	5.70672	0.78664	0.863973
RABGAP1	protein_coding	ENSG00000011454	-0.344406	5.2677	1.56439e-06	8.41106e-06
DCN	protein_coding	ENSG00000011465	-0.633	-4.1319	0.57168	0.686752
QPCTL	protein_coding	ENSG00000011478	-0.0649427	4.52429	0.383363	0.509156
PPP5C	protein_coding	ENSG00000011485	-0.00102463	6.82916	0.991513	1
CEP68	protein_coding	ENSG00000011523	-0.00529554	4.3686	0.956724	0.98853
MAP4K3	protein_coding	ENSG00000011566	-0.257079	5.64715	0.000174433	0.000650901
TMEM159	protein_coding	ENSG00000011638	-0.980348	2.9614	1.86837e-26	5.64661e-25
GABRA3	protein_coding	ENSG00000011677	0.0213972	4.27767	0.806313	0.879313
BRCA1	protein_coding	ENSG00000012048	-0.139856	6.47424	0.0334491	0.0693849
ERCC1	protein_coding	ENSG00000012061	0.531359	6.70209	2.98778e-16	4.59851e-15
CD22	protein_coding	ENSG00000012124	0.63233	0.331635	0.000712103	0.00232072
SEMA3B	protein_coding	ENSG00000012171	0.159953	4.63985	0.0284179	0.0604258
MBTPS2	protein_coding	ENSG00000012174	0.248628	4.27418	0.000770254	0.00249336
PRICKLE3	protein_coding	ENSG00000012211	0.367336	4.16759	3.653e-06	1.85008e-05
LTF	protein_coding	ENSG00000012223	0.338355	0.0117808	0.0644178	0.120207
EXTL3	protein_coding	ENSG00000012232	0.182443	7.14473	0.00457487	0.0122616
NR1H4	protein_coding	ENSG00000012504	2.89401	-3.55577	0.000101091	0.000395868
ELOVL5	protein_coding	ENSG00000012660	0.0570041	8.35549	0.410136	0.535501
ALOX5	protein_coding	ENSG00000012779	-0.430451	4.42731	5.86982e-09	4.43635e-08
CALCOCO1	protein_coding	ENSG00000012822	0.114448	5.11357	0.0922876	0.161998
UBR7	protein_coding	ENSG00000012963	-0.0813436	5.31764	0.265796	0.382246
MAP4K5	protein_coding	ENSG00000012983	0.128465	6.73391	0.0548612	0.105177
EHD3	protein_coding	ENSG00000013016	0.366165	4.65703	4.54953e-07	2.65917e-06
PSMC4	protein_coding	ENSG00000013275	-0.0586535	6.64313	0.356119	0.480497
MAN2B2	protein_coding	ENSG00000013288	-0.0489256	5.48089	0.460345	0.583996
CLDN11	protein_coding	ENSG00000013297	0.585791	-1.82931	0.222466	0.332271
SLC25A39	protein_coding	ENSG00000013306	-0.0676295	7.62909	0.303526	0.42427
MVP	protein_coding	ENSG00000013364	-0.150841	6.48634	0.022949	0.0501654
NUB1	protein_coding	ENSG00000013374	0.0801347	4.75147	0.268803	0.385763
PGM3	protein_coding	ENSG00000013375	-0.21304	5.20427	0.00271276	0.00771912
RWDD2A	protein_coding	ENSG00000013392	-0.68823	1.55312	5.60645e-09	4.25159e-08
CLK1	protein_coding	ENSG00000013441	-0.112816	5.73226	0.106166	0.182022
POLR3B	protein_coding	ENSG00000013503	0.0882395	4.51394	0.258883	0.374764
ANGEL1	protein_coding	ENSG00000013523	-0.31542	4.23739	2.18996e-05	9.66816e-05
RNF14	protein_coding	ENSG00000013561	-0.431354	4.71201	1.49892e-09	1.21197e-08
DNASE1L1	protein_coding	ENSG00000013563	-0.148637	5.01925	0.0289499	0.0613942
DDX11	protein_coding	ENSG00000013573	-0.121096	6.19965	0.0663767	0.12327
HEBP1	protein_coding	ENSG00000013583	-0.519961	4.46701	1.65259e-11	1.6517e-10
GPRC5A	protein_coding	ENSG00000013588	0.0898918	7.36126	0.156578	0.250915
MAMLD1	protein_coding	ENSG00000013619	1.50582	4.55973	1.48429e-70	2.35212e-68
TACC3	protein_coding	ENSG00000013810	-0.115389	7.31776	0.0761224	0.137945
UFL1	protein_coding	ENSG00000014123	0.14702	5.14745	0.0317524	0.0664021
POLA2	protein_coding	ENSG00000014138	-0.624455	2.05988	1.25805e-09	1.02477e-08
ZC3H3	protein_coding	ENSG00000014164	-0.131695	5.53891	0.0744956	0.135588
CAPN1	protein_coding	ENSG00000014216	-0.152997	6.24286	0.019508	0.0437605
MDH1	protein_coding	ENSG00000014641	-0.179852	6.65549	0.00496177	0.0131812
SLC30A9	protein_coding	ENSG00000014824	0.0267571	6.2765	0.685033	0.783867
MTMR11	protein_coding	ENSG00000014914	-0.401946	3.9699	2.98793e-07	1.78808e-06
COX15	protein_coding	ENSG00000014919	-0.381264	3.92059	7.88614e-07	4.45691e-06
CCDC88C	protein_coding	ENSG00000015133	2.91626	-0.433151	1.82102e-28	6.10053e-27
YAF2	protein_coding	ENSG00000015153	0.24191	4.14287	0.00160859	0.00484025
ZMYND11	protein_coding	ENSG00000015171	-0.133575	5.28371	0.0712256	0.130574
WAS	protein_coding	ENSG00000015285	0.215447	-2.55206	0.696589	0.793396
BID	protein_coding	ENSG00000015475	-0.0927656	4.9314	0.181171	0.282535
MATR3	protein_coding	ENSG00000015479	0.401558	1.01327	0.0103529	0.0252577
NPC1L1	protein_coding	ENSG00000015520	0.82713	-2.82899	0.481636	0.604038
XYLT2	protein_coding	ENSG00000015532	-0.0414727	5.64318	0.524411	0.643544
RGPD5	protein_coding	ENSG00000015568	0.246289	2.18653	0.0226437	0.0496061
STMN4	protein_coding	ENSG00000015592	1.36906	-3.07984	0.0393357	0.0796468
NUDCD3	protein_coding	ENSG00000015676	-0.0406824	6.5618	0.524706	0.643721
ISL1	protein_coding	ENSG00000016082	-0.732869	-3.65301	0.173582	0.272863
CHDH	protein_coding	ENSG00000016391	-0.392308	1.22358	0.00213655	0.00623341
IL20RA	protein_coding	ENSG00000016402	0.528806	-1.70497	0.101987	0.176109
GLT8D1	protein_coding	ENSG00000016864	-0.32315	4.88404	2.97297e-06	1.53144e-05
ATP2C1	protein_coding	ENSG00000017260	-0.034051	6.66266	0.604975	0.715684
IGF1	protein_coding	ENSG00000017427	3.42973	-2.5817	1.09917e-09	9.01456e-09
SLC38A5	protein_coding	ENSG00000017483	0.18835	0.115614	0.350929	0.474965
RALBP1	protein_coding	ENSG00000017797	-0.159539	7.56297	0.0179546	0.0406918
RUFY3	protein_coding	ENSG00000018189	-0.198346	5.64961	0.00256451	0.00734673
CNTN1	protein_coding	ENSG00000018236	-0.158464	4.03481	0.0577984	0.109759
SLC11A1	protein_coding	ENSG00000018280	-0.332497	-2.62813	0.491208	0.613201
WWTR1	protein_coding	ENSG00000018408	0.947659	6.01185	3.02292e-43	1.83408e-41
AGPS	protein_coding	ENSG00000018510	0.192941	7.43885	0.00314108	0.00880271
CXorf56	protein_coding	ENSG00000018610	0.194062	3.87713	0.0216547	0.0477696
ATP1A2	protein_coding	ENSG00000018625	-1.14791	1.33371	2.74215e-20	5.76857e-19
TTC27	protein_coding	ENSG00000018699	0.593448	5.11253	8.25552e-16	1.22823e-14
ZNF582	protein_coding	ENSG00000018869	-0.0612259	1.88499	0.603114	0.713833
PHLDB1	protein_coding	ENSG00000019144	0.168055	6.98021	0.00768141	0.0194269
MARCO	protein_coding	ENSG00000019169	0.782617	4.08164	9.81447e-19	1.84833e-17
CYP24A1	protein_coding	ENSG00000019186	2.39595	5.9735	6.28369e-246	1.68172e-242
PRDM11	protein_coding	ENSG00000019485	-0.741705	4.26309	1.04468e-23	2.74109e-22
SYT13	protein_coding	ENSG00000019505	1.39017	0.28468	8.28303e-14	1.02736e-12
SNAI2	protein_coding	ENSG00000019549	0.818539	4.79819	2.30924e-28	7.72539e-27
CD74	protein_coding	ENSG00000019582	1.74898	-2.73229	0.00204913	0.00601551
HGF	protein_coding	ENSG00000019991	1.02494	-3.3084	0.100311	0.173678
ZRANB1	protein_coding	ENSG00000019995	-0.547479	5.7094	1.42379e-15	2.07219e-14
NCDN	protein_coding	ENSG00000020129	0.0335277	5.37426	0.632247	0.739053
ADGRA2	protein_coding	ENSG00000020181	-0.347889	4.42102	5.44648e-06	2.68281e-05
ZFP64	protein_coding	ENSG00000020256	-0.149634	5.45195	0.0266204	0.0570874
MNAT1	protein_coding	ENSG00000020426	-0.0180383	5.33564	0.838904	0.904466
SAMD4A	protein_coding	ENSG00000020577	-0.549399	7.11042	7.3398e-17	1.19133e-15
RUNX3	protein_coding	ENSG00000020633	1.32285	3.97168	6.19237e-60	6.81076e-58
MRE11	protein_coding	ENSG00000020922	-0.131008	5.60741	0.0519306	0.10064
PLEKHB1	protein_coding	ENSG00000021300	-0.0683346	0.926835	0.612294	0.722072
SERPINB1	protein_coding	ENSG00000021355	0.424606	3.95796	1.14946e-07	7.32852e-07
SLC7A9	protein_coding	ENSG00000021488	0.229985	-2.19627	0.736509	0.82536
SPAST	protein_coding	ENSG00000021574	-0.416643	5.20672	1.63476e-09	1.3165e-08
NRXN3	protein_coding	ENSG00000021645	0.183317	4.62206	0.00985103	0.0242001
OSBPL5	protein_coding	ENSG00000021762	-0.316982	4.52371	1.50757e-05	6.86571e-05
AQR	protein_coding	ENSG00000021776	-0.107534	5.91656	0.111093	0.188948
CPS1	protein_coding	ENSG00000021826	0.0377041	4.72836	0.642254	0.747883
FHL1	protein_coding	ENSG00000022267	-0.159649	6.3836	0.0143938	0.0335985
RTF2	protein_coding	ENSG00000022277	0.0230744	6.39692	0.746117	0.831986
GABRA1	protein_coding	ENSG00000022355	-0.214503	1.00246	0.200465	0.305781
NLRP2	protein_coding	ENSG00000022556	0.0702512	3.16058	0.424566	0.549872
SLC45A4	protein_coding	ENSG00000022567	-0.123298	3.48598	0.147225	0.238613
RNF10	protein_coding	ENSG00000022840	-0.228088	6.90845	0.000315546	0.00111331
ZNF839	protein_coding	ENSG00000022976	0.913135	2.52576	4.08769e-19	7.94034e-18
ZDHHC6	protein_coding	ENSG00000023041	-0.38142	5.9635	5.85036e-09	4.42303e-08
GRAMD1B	protein_coding	ENSG00000023171	2.16429	5.09361	8.11853e-189	1.1503e-185
RNH1	protein_coding	ENSG00000023191	-0.012916	6.2934	0.846344	0.909922
NDUFS1	protein_coding	ENSG00000023228	0.16046	6.63569	0.0147015	0.0342339
RB1CC1	protein_coding	ENSG00000023287	-0.258724	6.6893	0.000266649	0.000956624
ERP44	protein_coding	ENSG00000023318	0.0414166	6.33207	0.542104	0.6599
ALAS1	protein_coding	ENSG00000023330	-0.0111643	5.85489	0.881566	0.934389
BIRC3	protein_coding	ENSG00000023445	3.92502	5.58688	7.47605e-50	5.80889e-48
AKAP11	protein_coding	ENSG00000023516	0.3056	6.14467	4.60516e-06	2.298e-05
GLRX2	protein_coding	ENSG00000023572	0.339058	2.20331	0.00213158	0.00622117
SNAPC1	protein_coding	ENSG00000023608	-0.0740039	7.0084	0.371883	0.4972
DERA	protein_coding	ENSG00000023697	-0.1958	4.65567	0.00590788	0.0153609
STRAP	protein_coding	ENSG00000023734	0.194433	7.8815	0.00565476	0.0147922
ABCC2	protein_coding	ENSG00000023839	0.420039	1.09481	0.00651616	0.0167615
DEF6	protein_coding	ENSG00000023892	-0.111664	1.1936	0.466382	0.590007
PLEKHO1	protein_coding	ENSG00000023902	0.0123083	5.16463	0.856408	0.91735
GCLM	protein_coding	ENSG00000023909	0.51403	5.3837	7.11352e-14	8.89172e-13
UBR2	protein_coding	ENSG00000024048	-0.110149	5.53278	0.123842	0.206903
EHD2	protein_coding	ENSG00000024422	-0.552692	4.87149	9.6325e-14	1.18679e-12
DEPDC1	protein_coding	ENSG00000024526	-0.495738	6.44127	2.62885e-13	3.1055e-12
CCDC28A	protein_coding	ENSG00000024862	-0.242893	3.15458	0.0111224	0.0268901
RRAGD	protein_coding	ENSG00000025039	-0.255111	3.87874	0.00107923	0.00338659
HSF2	protein_coding	ENSG00000025156	-0.564916	3.9397	6.01789e-12	6.26417e-11
PHF20	protein_coding	ENSG00000025293	-0.0347059	5.03357	0.640399	0.746193
HSD17B6	protein_coding	ENSG00000025423	0.119064	0.666101	0.468172	0.59165
NR1H3	protein_coding	ENSG00000025434	-0.0502268	2.78317	0.624766	0.732885
TYMP	protein_coding	ENSG00000025708	-0.317987	-0.996414	0.184193	0.286384
NCAPH2	protein_coding	ENSG00000025770	-0.164108	6.19792	0.0175673	0.0399304
TOMM34	protein_coding	ENSG00000025772	0.410559	7.23741	3.36965e-10	2.92908e-09
SEC63	protein_coding	ENSG00000025796	0.0842644	6.97123	0.206372	0.312674
KPNA6	protein_coding	ENSG00000025800	-0.0668907	6.43553	0.304011	0.424727
VIM	protein_coding	ENSG00000026025	0.0373678	11.2616	0.566029	0.682038
RTEL1-TNFRSF6B	protein_coding	ENSG00000026036	-0.301491	0.252899	0.104231	0.179349
FAS	protein_coding	ENSG00000026103	-0.485773	5.16556	7.90294e-13	8.92861e-12
RNASET2	protein_coding	ENSG00000026297	-0.249727	2.92161	0.0164903	0.0378397
CD44	protein_coding	ENSG00000026508	0.800055	8.60747	2.79645e-36	1.36077e-34
KCNG1	protein_coding	ENSG00000026559	0.528225	5.90266	1.29032e-15	1.88707e-14
AGPAT4	protein_coding	ENSG00000026652	0.0817164	4.26756	0.314599	0.436029
SLAMF7	protein_coding	ENSG00000026751	-0.0848672	3.84225	0.291271	0.410482
BTN3A1	protein_coding	ENSG00000026950	-0.42834	1.99396	5.7762e-05	0.000236377
MIPEP	protein_coding	ENSG00000027001	-0.177874	3.46073	0.0390438	0.0791222
PRKCH	protein_coding	ENSG00000027075	0.475879	5.11484	3.10436e-09	2.42618e-08
INSRR	protein_coding	ENSG00000027644	3.02374	-0.893045	3.19164e-21	7.17805e-20
IFNGR1	protein_coding	ENSG00000027697	-0.0265982	4.86052	0.721087	0.813452
B4GALT7	protein_coding	ENSG00000027847	-0.0253831	4.1125	0.747053	0.832723
SH2D2A	protein_coding	ENSG00000027869	3.75275	3.09175	3.17763e-241	7.65396e-238
VRK2	protein_coding	ENSG00000028116	-0.0504004	6.07999	0.458956	0.582906
TNFRSF1B	protein_coding	ENSG00000028137	0.948023	-1.2793	0.000171041	0.000639928
VEZT	protein_coding	ENSG00000028203	-0.0159436	5.09698	0.835382	0.901818
POU2F2	protein_coding	ENSG00000028277	2.20706	4.35295	5.98759e-161	5.76892e-158
BRD9	protein_coding	ENSG00000028310	0.829159	5.86177	5.33959e-36	2.55695e-34
SNX1	protein_coding	ENSG00000028528	-0.0709103	7.34137	0.260945	0.376912
TBPL1	protein_coding	ENSG00000028839	0.105766	4.67694	0.143753	0.233927
ARNTL2	protein_coding	ENSG00000029153	0.0185319	5.86568	0.772477	0.8525
BCLAF1	protein_coding	ENSG00000029363	0.181255	8.2726	0.00756897	0.0191788
SLC39A9	protein_coding	ENSG00000029364	0.0172336	7.00193	0.788743	0.865609
ANK1	protein_coding	ENSG00000029534	-0.038976	1.93025	0.736049	0.825037
TFB1M	protein_coding	ENSG00000029639	0.057265	3.28608	0.550113	0.667334
RABEP1	protein_coding	ENSG00000029725	0.206946	5.86812	0.00333156	0.00926643
HMGB3	protein_coding	ENSG00000029993	-0.0146033	6.18817	0.852816	0.914635
NUP160	protein_coding	ENSG00000030066	0.179045	6.81762	0.00596481	0.0154838
BAK1	protein_coding	ENSG00000030110	0.608195	5.62089	2.28081e-17	3.87432e-16
IKZF2	protein_coding	ENSG00000030419	-0.785791	2.9963	1.57378e-17	2.72129e-16
GRN	protein_coding	ENSG00000030582	-0.0700633	7.214	0.299971	0.420448
FAM13B	protein_coding	ENSG00000031003	0.147812	5.59786	0.0326834	0.0680361
ARHGAP31	protein_coding	ENSG00000031081	0.23003	6.08794	0.00106966	0.00335961
CENPQ	protein_coding	ENSG00000031691	-0.0411058	3.76169	0.673868	0.773996
SARS	protein_coding	ENSG00000031698	0.0360751	8.0228	0.586685	0.699893
RANBP3	protein_coding	ENSG00000031823	0.0709032	5.63843	0.281818	0.399891
ARID4A	protein_coding	ENSG00000032219	-0.301917	5.12854	0.000117341	0.000453893
EIPR1	protein_coding	ENSG00000032389	-0.114563	3.4491	0.228587	0.339539
PNPLA6	protein_coding	ENSG00000032444	-0.373542	5.46939	2.11625e-07	1.29278e-06
IFT88	protein_coding	ENSG00000032742	-0.292719	2.84958	0.00311621	0.00873911
ALG1	protein_coding	ENSG00000033011	0.141164	4.6033	0.0526507	0.101822
ZCCHC8	protein_coding	ENSG00000033030	-0.356911	5.35276	1.23868e-07	7.86193e-07
ABCF2	protein_coding	ENSG00000033050	0.172881	3.07729	0.0808622	0.145147
CHPF2	protein_coding	ENSG00000033100	0.601922	4.01807	3.69965e-14	4.74513e-13
LRRC7	protein_coding	ENSG00000033122	-1.11102	-0.186323	8.94341e-09	6.6019e-08
FUT8	protein_coding	ENSG00000033170	-0.0314694	6.26716	0.628012	0.735387
UBA6	protein_coding	ENSG00000033178	-0.102044	6.82798	0.117479	0.197924
GAB2	protein_coding	ENSG00000033327	-0.701602	4.5145	1.65038e-21	3.76447e-20
ATP6V0A1	protein_coding	ENSG00000033627	-0.677497	-0.140471	0.000380567	0.00131914
PIAS1	protein_coding	ENSG00000033800	-0.385521	5.62597	9.08911e-09	6.69918e-08
SLC4A7	protein_coding	ENSG00000033867	0.386608	5.88013	8.03968e-09	5.98985e-08
APBA2	protein_coding	ENSG00000034053	-0.262777	4.63779	0.000276803	0.000989076
MAP2K3	protein_coding	ENSG00000034152	1.24212	6.92867	1.85114e-66	2.59235e-64
EFCAB1	protein_coding	ENSG00000034239	1.58193	-1.90237	3.58288e-05	0.00015261
TMSB10	protein_coding	ENSG00000034510	0.0703114	9.31011	0.314933	0.436366
ASTE1	protein_coding	ENSG00000034533	-0.396441	2.79705	7.3749e-05	0.000296758
RNF19A	protein_coding	ENSG00000034677	-0.20563	6.13183	0.00175592	0.00523986
PEX3	protein_coding	ENSG00000034693	-0.0724392	4.30472	0.390681	0.516667
GABARAPL2	protein_coding	ENSG00000034713	-0.119294	5.4979	0.0934387	0.16353
SH3YL1	protein_coding	ENSG00000035115	0.120155	2.21966	0.31947	0.4411
FAM136A	protein_coding	ENSG00000035141	0.231072	7.04033	0.00073254	0.00238184
VCL	protein_coding	ENSG00000035403	0.58057	8.25651	1.92857e-19	3.82332e-18
DEPDC1B	protein_coding	ENSG00000035499	-0.128248	5.57948	0.0689173	0.127155
DAPK2	protein_coding	ENSG00000035664	-0.442758	1.61345	0.000557929	0.00186159
NSMAF	protein_coding	ENSG00000035681	0.0612323	6.00168	0.360505	0.484921
ADSS	protein_coding	ENSG00000035687	-0.077336	5.44453	0.278698	0.396514
TIMP2	protein_coding	ENSG00000035862	0.110952	7.92251	0.0957534	0.166914
RFC1	protein_coding	ENSG00000035928	-0.269969	7.5343	0.000104793	0.000409233
TBC1D23	protein_coding	ENSG00000036054	0.0993677	5.88452	0.14684	0.238049
CUL3	protein_coding	ENSG00000036257	-0.0373652	7.06685	0.578358	0.692735
MYOM2	protein_coding	ENSG00000036448	0.617648	1.77778	1.4939e-07	9.32701e-07
CYP46A1	protein_coding	ENSG00000036530	-0.252649	-1.71369	0.350149	0.474143
AC118549.1	protein_coding	ENSG00000036549	-0.0279938	6.19526	0.695158	0.792291
USP2	protein_coding	ENSG00000036672	-0.709107	-0.841947	0.00167523	0.00502319
TUBG2	protein_coding	ENSG00000037042	-0.364467	2.03306	0.000833987	0.00268093
RPL26L1	protein_coding	ENSG00000037241	0.482827	4.93075	1.9208e-08	1.35798e-07
FLT4	protein_coding	ENSG00000037280	-0.186471	4.3258	0.0116848	0.0280517
NSUN2	protein_coding	ENSG00000037474	0.478334	7.93566	2.21213e-13	2.6365e-12
FBXO42	protein_coding	ENSG00000037637	-0.0273554	3.93608	0.716344	0.80996
MFAP3	protein_coding	ENSG00000037749	0.0754993	5.88467	0.252795	0.367587
MRI1	protein_coding	ENSG00000037757	-0.548299	4.03435	3.57671e-13	4.17606e-12
METTL1	protein_coding	ENSG00000037897	0.565919	3.91137	1.47266e-11	1.47799e-10
HOXC8	protein_coding	ENSG00000037965	-0.0144918	3.90411	0.884099	0.93622
AGA	protein_coding	ENSG00000038002	0.158076	3.5911	0.0557618	0.106488
PI4K2B	protein_coding	ENSG00000038210	-0.0820909	2.3658	0.472889	0.595986
BOD1L1	protein_coding	ENSG00000038219	0.442958	6.6629	1.35396e-07	8.53517e-07
MAT2B	protein_coding	ENSG00000038274	-0.0523789	5.45614	0.43858	0.563265
TLL1	protein_coding	ENSG00000038295	0.0966471	-0.0342589	0.644728	0.749966
EDC4	protein_coding	ENSG00000038358	0.159733	6.15973	0.0149464	0.0347304
TRIO	protein_coding	ENSG00000038382	0.710411	8.49665	1.46392e-26	4.45784e-25
VCAN	protein_coding	ENSG00000038427	1.34144	-0.959072	5.26125e-06	2.59688e-05
CLEC16A	protein_coding	ENSG00000038532	0.16732	6.1454	0.0128174	0.0303961
MSR1	protein_coding	ENSG00000038945	0.236587	-2.64257	0.662035	0.764158
CDH1	protein_coding	ENSG00000039068	0.326267	2.5409	0.000816768	0.00262944
MTREX	protein_coding	ENSG00000039123	-0.129015	6.9263	0.0621747	0.11669
DNAH5	protein_coding	ENSG00000039139	0.148393	1.59474	0.251118	0.365678
ZFYVE16	protein_coding	ENSG00000039319	-0.162604	5.76633	0.0177783	0.0403415
RIPOR1	protein_coding	ENSG00000039523	-0.117987	6.56551	0.0712442	0.130598
RAI14	protein_coding	ENSG00000039560	0.156316	7.61271	0.0209462	0.0464407
SOX30	protein_coding	ENSG00000039600	1.31561	-3.80123	0.159641	0.254823
PNKP	protein_coding	ENSG00000039650	0.127254	5.08538	0.0884338	0.156372
BEST2	protein_coding	ENSG00000039987	1.27197	-1.97014	0.00203313	0.00597147
PHLPP2	protein_coding	ENSG00000040199	0.16478	6.18644	0.0124134	0.0295602
SPDL1	protein_coding	ENSG00000040275	0.146835	6.21676	0.0286354	0.0608017
STAU2	protein_coding	ENSG00000040341	-0.135273	5.72133	0.0785281	0.141569
PQLC2	protein_coding	ENSG00000040487	0.110996	3.94647	0.175444	0.275233
CTNS	protein_coding	ENSG00000040531	-0.506249	3.40718	7.02476e-09	5.26627e-08
RTN4R	protein_coding	ENSG00000040608	-0.643638	3.87565	2.67383e-13	3.15246e-12
PHF23	protein_coding	ENSG00000040633	0.479154	5.66507	9.95771e-13	1.11455e-11
CDH10	protein_coding	ENSG00000040731	-1.36101	0.187035	0.00174188	0.00520425
INPP4A	protein_coding	ENSG00000040933	-0.191194	5.71068	0.00373077	0.010235
RAB27B	protein_coding	ENSG00000041353	-0.578294	1.10145	3.2632e-05	0.000140033
PSMA4	protein_coding	ENSG00000041357	0.00783177	7.58389	0.902702	0.948457
MYO16	protein_coding	ENSG00000041515	-1.17314	1.86192	3.3476e-23	8.53265e-22
LSG1	protein_coding	ENSG00000041802	0.367068	6.79371	8.39077e-09	6.21872e-08
PARP3	protein_coding	ENSG00000041880	0.0316392	4.34459	0.671801	0.772101
TNC	protein_coding	ENSG00000041982	0.651735	8.97666	1.61944e-22	3.94412e-21
THAP3	protein_coding	ENSG00000041988	-0.586445	2.90304	4.713e-09	3.60731e-08
RIPOR3	protein_coding	ENSG00000042062	0.878898	-3.57015	0.169557	0.267548
TDP1	protein_coding	ENSG00000042088	0.0148226	4.35641	0.835903	0.90224
AIFM2	protein_coding	ENSG00000042286	-0.204567	5.73212	0.00343163	0.00951509
SPATA7	protein_coding	ENSG00000042317	-0.548492	2.45606	2.82217e-07	1.69394e-06
MED17	protein_coding	ENSG00000042429	0.142742	2.30763	0.183929	0.286076
RETSAT	protein_coding	ENSG00000042445	-0.409298	5.02715	2.98342e-09	2.33773e-08
CAPG	protein_coding	ENSG00000042493	-0.114689	4.71049	0.122785	0.205455
AP2S1	protein_coding	ENSG00000042753	-0.123399	6.32542	0.0560094	0.106885
USH2A	protein_coding	ENSG00000042781	0.69422	-3.01009	0.211365	0.318794
TG	protein_coding	ENSG00000042832	0.163777	-1.37464	0.574707	0.689459
ADAM28	protein_coding	ENSG00000042980	-0.415872	-0.0735512	0.0249233	0.0539281
BARX2	protein_coding	ENSG00000043039	0.582362	-1.03812	0.0651748	0.121366
DCUN1D1	protein_coding	ENSG00000043093	-0.35849	5.4339	1.13007e-07	7.21631e-07
JADE2	protein_coding	ENSG00000043143	0.251038	6.00198	0.000157204	0.000592299
LCP2	protein_coding	ENSG00000043462	2.86668	-3.50428	0.00147995	0.00449584
TRIT1	protein_coding	ENSG00000043514	0.119095	4.82673	0.111035	0.188877
ADRB1	protein_coding	ENSG00000043591	1.3295	-3.78851	0.0299637	0.0631881
CUL7	protein_coding	ENSG00000044090	-0.21813	5.35038	0.00112726	0.00352079
CTNNA1	protein_coding	ENSG00000044115	0.189274	8.42564	0.00377659	0.0103442
PHKA2	protein_coding	ENSG00000044446	0.0339538	4.45347	0.638513	0.744604
CNTLN	protein_coding	ENSG00000044459	-0.395583	3.14633	1.34889e-05	6.20407e-05
EPHA3	protein_coding	ENSG00000044524	-0.754509	-2.35966	0.0368604	0.0752739
HSPA5	protein_coding	ENSG00000044574	0.401721	9.9181	1.99177e-09	1.59018e-08
DSG2	protein_coding	ENSG00000046604	-0.231131	6.77452	0.00031736	0.00111938
GEMIN8	protein_coding	ENSG00000046647	-0.528199	1.00551	0.000571417	0.00190159
OFD1	protein_coding	ENSG00000046651	-0.2834	4.08966	0.000363003	0.00126536
GPM6B	protein_coding	ENSG00000046653	-0.0139876	0.410627	0.961889	0.992419
MAGEC2	protein_coding	ENSG00000046774	0.177652	-2.85621	0.831354	0.898527
PREX2	protein_coding	ENSG00000046889	0.106169	0.313221	0.521673	0.640739
WDR37	protein_coding	ENSG00000047056	0.340436	3.00367	0.000259412	0.000932882
YTHDC2	protein_coding	ENSG00000047188	-0.280229	5.39525	5.53994e-05	0.000227636
CTPS2	protein_coding	ENSG00000047230	-0.490008	2.33257	1.15183e-06	6.32416e-06
ATP6V1H	protein_coding	ENSG00000047249	-0.135623	4.65886	0.0611872	0.115197
POLR2B	protein_coding	ENSG00000047315	0.087879	7.94921	0.177484	0.27789
FAM214A	protein_coding	ENSG00000047346	-1.27598	2.29458	2.38252e-28	7.95948e-27
ARAP2	protein_coding	ENSG00000047365	-0.00943018	6.19288	0.912172	0.955116
TPR	protein_coding	ENSG00000047410	-0.0611599	8.03372	0.36636	0.491123
CP	protein_coding	ENSG00000047457	0.340165	-2.56499	0.425246	0.550546
KIAA0556	protein_coding	ENSG00000047578	-0.0310321	5.08943	0.645702	0.750738
DTNBP1	protein_coding	ENSG00000047579	-0.286685	3.05306	0.00201007	0.00591058
XK	protein_coding	ENSG00000047597	-0.100062	1.43212	0.502752	0.623862
ANO2	protein_coding	ENSG00000047617	0.22355	5.59896	0.000682973	0.00223394
C12orf4	protein_coding	ENSG00000047621	0.184854	4.99948	0.00983055	0.0241572
SCML1	protein_coding	ENSG00000047634	0.198554	4.75221	0.00778689	0.0196483
WWC3	protein_coding	ENSG00000047644	-0.13362	2.64141	0.174451	0.273996
ARHGAP6	protein_coding	ENSG00000047648	-0.749074	0.796204	1.99137e-06	1.0542e-05
FAM184B	protein_coding	ENSG00000047662	-1.2226	-2.70381	0.0422269	0.0846753
MAP4	protein_coding	ENSG00000047849	0.0670591	8.75793	0.314393	0.435882
GOPC	protein_coding	ENSG00000047932	-0.536762	5.65619	3.47096e-14	4.46132e-13
ROS1	protein_coding	ENSG00000047936	0.718678	3.86956	9.21662e-18	1.61926e-16
USP28	protein_coding	ENSG00000048028	-0.68935	5.90125	3.73892e-23	9.47994e-22
HDAC9	protein_coding	ENSG00000048052	0.0186925	5.3146	0.778613	0.856955
TSPAN17	protein_coding	ENSG00000048140	0.206553	6.92365	0.00125691	0.00388442
NOP16	protein_coding	ENSG00000048162	0.485136	5.89425	1.07919e-12	1.20122e-11
CC2D2A	protein_coding	ENSG00000048342	-0.325182	4.2704	4.01203e-05	0.000168977
RRM2B	protein_coding	ENSG00000048392	-0.476359	7.50715	3.5825e-13	4.1808e-12
ZNF800	protein_coding	ENSG00000048405	0.0746534	4.53067	0.298023	0.418229
SNX29	protein_coding	ENSG00000048471	-0.345895	3.57808	4.87332e-05	0.000202316
LMO3	protein_coding	ENSG00000048540	0.258429	-3.12733	0.816283	0.886906
MRPS10	protein_coding	ENSG00000048544	-0.17101	5.83843	0.0141557	0.0331059
RSF1	protein_coding	ENSG00000048649	0.0877283	6.58254	0.208828	0.315621
VPS13D	protein_coding	ENSG00000048707	-0.109325	5.89566	0.152358	0.24536
CELF2	protein_coding	ENSG00000048740	-0.284303	2.22471	0.0158418	0.03655
FAM120A	protein_coding	ENSG00000048828	-0.126315	7.69632	0.0488152	0.095509
R3HDM1	protein_coding	ENSG00000048991	-0.262618	6.0736	0.000248894	0.00089922
COL9A2	protein_coding	ENSG00000049089	-0.0226315	4.52962	0.756379	0.840317
KITLG	protein_coding	ENSG00000049130	1.44235	5.25265	2.00255e-69	3.03367e-67
ERCC8	protein_coding	ENSG00000049167	-0.0498128	3.76395	0.586688	0.699893
ADAMTS6	protein_coding	ENSG00000049192	0.561023	6.13186	2.30298e-14	3.01641e-13
H6PD	protein_coding	ENSG00000049239	1.29952	4.91852	7.45088e-68	1.08114e-65
VAMP3	protein_coding	ENSG00000049245	0.179179	6.00988	0.00571305	0.0149252
PER3	protein_coding	ENSG00000049246	-0.614113	5.40136	2.91226e-18	5.27823e-17
TNFRSF9	protein_coding	ENSG00000049249	1.11299	4.363	4.5672e-46	3.12529e-44
EPN3	protein_coding	ENSG00000049283	-1.56234	-0.427053	2.60641e-15	3.70168e-14
LTBP1	protein_coding	ENSG00000049323	0.244031	7.01609	0.00027749	0.000991383
RCN1	protein_coding	ENSG00000049449	0.0996967	7.28393	0.125473	0.209053
ELN	protein_coding	ENSG00000049540	0.238153	-3.74641	0.693946	0.791096
RFC2	protein_coding	ENSG00000049541	-0.233224	6.07407	0.000614454	0.00202997
ARID1B	protein_coding	ENSG00000049618	-0.378318	6.5366	9.02905e-08	5.83846e-07
CLPTM1L	protein_coding	ENSG00000049656	-0.308685	8.76368	1.00541e-06	5.58004e-06
NEDD4L	protein_coding	ENSG00000049759	0.341243	7.27272	1.5525e-07	9.67028e-07
FOXP3	protein_coding	ENSG00000049768	1.33453	0.787331	7.281e-17	1.18259e-15
PPP1R3F	protein_coding	ENSG00000049769	0.818456	1.53294	1.34283e-10	1.21688e-09
HEXB	protein_coding	ENSG00000049860	-0.0597879	5.2957	0.366509	0.491269
PTCD2	protein_coding	ENSG00000049883	0.102811	4.26038	0.180023	0.281037
NEXMIF	protein_coding	ENSG00000050030	-1.74132	0.0698142	4.56953e-20	9.43155e-19
JKAMP	protein_coding	ENSG00000050130	-0.0952371	6.14716	0.152917	0.245947
DKK3	protein_coding	ENSG00000050165	-0.0693891	7.65893	0.268117	0.384963
ARHGEF5	protein_coding	ENSG00000050327	-0.200304	-0.519859	0.310497	0.431561
MCUR1	protein_coding	ENSG00000050393	0.0535553	5.15421	0.425309	0.550598
LIMA1	protein_coding	ENSG00000050405	0.347428	7.91592	1.85601e-07	1.14542e-06
LETMD1	protein_coding	ENSG00000050426	-0.631071	4.85094	2.65384e-18	4.82802e-17
SLC4A8	protein_coding	ENSG00000050438	0.219874	4.20094	0.00903549	0.0224323
LAMC3	protein_coding	ENSG00000050555	0.126922	5.81076	0.071899	0.131608
PTGER3	protein_coding	ENSG00000050628	-0.58507	-1.53768	0.026369	0.056624
TNIP3	protein_coding	ENSG00000050730	0.937843	-0.363172	2.06881e-05	9.17537e-05
MAPK9	protein_coding	ENSG00000050748	0.0240003	6.0312	0.715359	0.809112
BCAR1	protein_coding	ENSG00000050820	-0.0394231	6.70395	0.536575	0.654608
FAM160A2	protein_coding	ENSG00000051009	-0.429876	4.54142	3.55809e-09	2.76375e-08
HERPUD1	protein_coding	ENSG00000051108	1.10872	6.70387	2.1483e-65	2.8589e-63
HOMER3	protein_coding	ENSG00000051128	0.0263019	4.31174	0.734043	0.823778
RAD51	protein_coding	ENSG00000051180	0.551523	-3.58675	0.460505	0.584138
POLQ	protein_coding	ENSG00000051341	-0.265347	6.25189	3.87131e-05	0.000163651
PIK3CB	protein_coding	ENSG00000051382	-0.516898	4.6447	1.21841e-11	1.23414e-10
CYBA	protein_coding	ENSG00000051523	-1.82091	-1.74717	3.52192e-09	2.73653e-08
THOC3	protein_coding	ENSG00000051596	-0.0690387	5.40065	0.344193	0.467575
HEBP2	protein_coding	ENSG00000051620	-0.0851121	5.87096	0.18571	0.288148
MPHOSPH9	protein_coding	ENSG00000051825	-0.214167	5.91568	0.00152575	0.00461927
PLEKHA5	protein_coding	ENSG00000052126	-0.272178	5.74636	5.51689e-05	0.000226805
PRSS8	protein_coding	ENSG00000052344	-0.417362	-0.924403	0.0763331	0.138246
SIKE1	protein_coding	ENSG00000052723	-0.0997563	6.16288	0.120728	0.202618
RRP12	protein_coding	ENSG00000052749	0.767535	6.7664	2.31531e-31	8.89457e-30
FNIP2	protein_coding	ENSG00000052795	-0.7184	4.15846	8.17041e-20	1.65657e-18
MSMO1	protein_coding	ENSG00000052802	-0.0974083	6.47579	0.163322	0.259659
TTC17	protein_coding	ENSG00000052841	-0.153817	5.94625	0.0195893	0.0439049
ALX4	protein_coding	ENSG00000052850	-1.17231	-0.839029	1.49345e-07	9.3266e-07
FSTL4	protein_coding	ENSG00000053108	-0.799217	-0.81303	0.000452663	0.00154132
FOXN3	protein_coding	ENSG00000053254	-0.69441	6.16168	5.13136e-23	1.28615e-21
AKR7A2	protein_coding	ENSG00000053371	-0.144134	5.02047	0.0346033	0.0714399
MRTO4	protein_coding	ENSG00000053372	0.464493	6.76038	1.04962e-11	1.06857e-10
USE1	protein_coding	ENSG00000053501	0.318046	2.78842	0.00175597	0.00523986
MCF2L2	protein_coding	ENSG00000053524	-0.524634	1.11775	8.81997e-05	0.000349304
LAMA3	protein_coding	ENSG00000053747	1.94438	4.1634	3.47221e-120	1.41754e-117
AP5M1	protein_coding	ENSG00000053770	-0.10588	5.7214	0.128054	0.212545
ANAPC4	protein_coding	ENSG00000053900	-0.173665	4.18781	0.02204	0.0485175
KCNQ1	protein_coding	ENSG00000053918	-0.607485	-2.85541	0.14368	0.233839
TRAPPC3	protein_coding	ENSG00000054116	-0.0665096	5.9164	0.335853	0.458547
THRAP3	protein_coding	ENSG00000054118	0.323979	8.38184	1.22766e-06	6.71146e-06
PHPT1	protein_coding	ENSG00000054148	-0.325294	5.22515	4.61808e-06	2.30349e-05
ARID4B	protein_coding	ENSG00000054267	0.0760446	5.8281	0.27961	0.397436
OPN3	protein_coding	ENSG00000054277	0.630983	-0.136459	0.0147432	0.0343243
SDCCAG8	protein_coding	ENSG00000054282	0.187003	3.19009	0.0321897	0.0671708
PTPRN	protein_coding	ENSG00000054356	0.471148	8.12195	1.20147e-12	1.33179e-11
HHAT	protein_coding	ENSG00000054392	0.423088	5.15867	2.04946e-09	1.63408e-08
KIF1B	protein_coding	ENSG00000054523	0.134256	6.6228	0.0582796	0.110578
FOXC1	protein_coding	ENSG00000054598	0.569379	4.14017	1.11951e-12	1.24495e-11
TBC1D22A	protein_coding	ENSG00000054611	-0.130629	4.92321	0.0666162	0.12362
SYNE2	protein_coding	ENSG00000054654	-0.24839	6.85267	0.057125	0.108721
PLEKHH1	protein_coding	ENSG00000054690	-0.0819425	4.40009	0.256283	0.371604
ATP9A	protein_coding	ENSG00000054793	0.20431	5.47647	0.00176379	0.00525994
CBLN4	protein_coding	ENSG00000054803	0.220344	-0.527953	0.305243	0.426019
FAM168A	protein_coding	ENSG00000054965	-0.369018	6.10849	2.645e-08	1.8318e-07
RELT	protein_coding	ENSG00000054967	0.055586	4.65608	0.472548	0.595723
GALC	protein_coding	ENSG00000054983	0.144821	5.39787	0.030662	0.0643957
NOP58	protein_coding	ENSG00000055044	0.559229	7.79746	2.78348e-16	4.2923e-15
SZRD1	protein_coding	ENSG00000055070	0.142332	7.75458	0.0295796	0.0625401
KCNH2	protein_coding	ENSG00000055118	-0.483113	2.22447	3.65429e-06	1.85035e-05
CUL1	protein_coding	ENSG00000055130	-0.115744	5.32714	0.105809	0.181591
FAM114A2	protein_coding	ENSG00000055147	-0.337887	4.32869	8.93102e-06	4.23968e-05
CYFIP2	protein_coding	ENSG00000055163	-0.489466	5.86222	1.88962e-13	2.26219e-12
TAB2	protein_coding	ENSG00000055208	-0.0811061	7.25717	0.218803	0.32798
GINM1	protein_coding	ENSG00000055211	0.0203774	5.78525	0.752836	0.837425
EIF2AK2	protein_coding	ENSG00000055332	-0.297792	6.84152	4.31153e-06	2.16223e-05
USP36	protein_coding	ENSG00000055483	0.844786	7.25979	6.40204e-38	3.28797e-36
KMT2C	protein_coding	ENSG00000055609	-0.253612	4.94519	0.00145956	0.00444174
CCDC85A	protein_coding	ENSG00000055813	-0.433027	2.03679	5.08932e-05	0.000210666
PUM2	protein_coding	ENSG00000055917	-0.00998995	7.23536	0.882672	0.935163
MRPL43	protein_coding	ENSG00000055950	-0.0616193	5.34669	0.377294	0.502676
ITIH4	protein_coding	ENSG00000055955	1.78629	-3.74509	0.0444922	0.088464
HPF1	protein_coding	ENSG00000056050	-0.402029	4.35757	7.97017e-07	4.50018e-06
ZFR	protein_coding	ENSG00000056097	0.265298	8.02768	0.000253926	0.00091548
ZNF280C	protein_coding	ENSG00000056277	0.603491	3.19479	2.23089e-11	2.19418e-10
NPFFR2	protein_coding	ENSG00000056291	-0.417708	4.38713	1.45672e-08	1.04553e-07
PHF21B	protein_coding	ENSG00000056487	-0.332006	3.40188	0.000112452	0.000435892
TRAF1	protein_coding	ENSG00000056558	3.65496	3.75293	2.46168e-91	5.98935e-89
RC3H2	protein_coding	ENSG00000056586	0.0601058	5.90639	0.376886	0.5023
IL17RB	protein_coding	ENSG00000056736	-0.614986	1.73245	7.15265e-08	4.68168e-07
TRAF3IP2	protein_coding	ENSG00000056972	-0.483272	2.7509	2.93762e-07	1.76016e-06
GYG2	protein_coding	ENSG00000056998	-0.549854	2.9062	3.45111e-09	2.68324e-08
DCBLD2	protein_coding	ENSG00000057019	0.744402	9.45978	7.80212e-29	2.66189e-27
SOAT1	protein_coding	ENSG00000057252	-0.144038	6.54048	0.024674	0.0534604
PKP2	protein_coding	ENSG00000057294	-0.887208	5.22192	1.70891e-38	9.06661e-37
MSH4	protein_coding	ENSG00000057468	0.561001	-1.17882	0.0759735	0.137747
GDI2	protein_coding	ENSG00000057608	-0.00571585	8.38075	0.933525	0.970849
PRDM1	protein_coding	ENSG00000057657	1.64856	3.00888	1.88988e-46	1.31186e-44
ATG5	protein_coding	ENSG00000057663	-0.294589	4.83858	8.42877e-05	0.000335466
TMCC3	protein_coding	ENSG00000057704	0.606714	0.184032	0.00173404	0.00518274
PITHD1	protein_coding	ENSG00000057757	0.415867	5.91714	4.70935e-10	4.02534e-09
MTA3	protein_coding	ENSG00000057935	-0.317563	5.38703	1.85232e-06	9.86444e-06
USP13	protein_coding	ENSG00000058056	-0.438603	5.83888	1.03798e-10	9.53905e-10
ATP11B	protein_coding	ENSG00000058063	0.031967	7.11374	0.622611	0.731197
LAMC2	protein_coding	ENSG00000058085	1.02774	7.93139	7.22333e-60	7.90856e-58
CDK14	protein_coding	ENSG00000058091	-0.132793	6.25891	0.0496346	0.0967977
SEC61A1	protein_coding	ENSG00000058262	0.0614624	8.76824	0.344474	0.467878
PPP1R12A	protein_coding	ENSG00000058272	-0.118186	6.61984	0.0944575	0.165001
RASGRF1	protein_coding	ENSG00000058335	0.805895	6.87306	1.59496e-33	6.7637e-32
CAMK2B	protein_coding	ENSG00000058404	0.969934	0.798727	4.03988e-10	3.4753e-09
CROCC	protein_coding	ENSG00000058453	-0.140502	4.80388	0.0727815	0.132981
POLR3E	protein_coding	ENSG00000058600	-0.0867538	5.94085	0.179474	0.280413
ATP2B4	protein_coding	ENSG00000058668	-0.266769	5.97418	0.000122914	0.000473246
ZC3H11A	protein_coding	ENSG00000058673	-0.104718	-2.26822	0.908376	0.952496
RIOK2	protein_coding	ENSG00000058729	0.106712	5.36235	0.139977	0.228771
YIPF1	protein_coding	ENSG00000058799	-0.112509	4.27276	0.141963	0.231562
NDC1	protein_coding	ENSG00000058804	-0.0122806	6.44946	0.848052	0.911027
DGKG	protein_coding	ENSG00000058866	-0.405453	2.34974	0.000179559	0.000668271
FLYWCH1	protein_coding	ENSG00000059122	-0.875981	5.22279	2.71994e-35	1.25991e-33
UNKL	protein_coding	ENSG00000059145	-0.306783	5.42866	7.92254e-06	3.79989e-05
TBXAS1	protein_coding	ENSG00000059377	-0.469859	0.459778	0.00510502	0.0135096
PARP12	protein_coding	ENSG00000059378	0.206938	4.34019	0.00509142	0.0134825
ALDH18A1	protein_coding	ENSG00000059573	0.311903	7.29626	8.62642e-07	4.82995e-06
TARBP1	protein_coding	ENSG00000059588	0.00334335	2.42448	0.996347	1
GATB	protein_coding	ENSG00000059691	0.055177	3.99713	0.486253	0.608688
MXD1	protein_coding	ENSG00000059728	0.449865	2.75407	4.34069e-06	2.1764e-05
CDK17	protein_coding	ENSG00000059758	0.525247	4.78024	8.54243e-12	8.767e-11
DNAJC25	protein_coding	ENSG00000059769	0.503811	3.54095	3.59504e-08	2.44753e-07
SLC2A3	protein_coding	ENSG00000059804	0.209966	5.67057	0.00153202	0.00463474
PSD	protein_coding	ENSG00000059915	-0.0587136	2.15391	0.565093	0.681354
CTDP1	protein_coding	ENSG00000060069	0.114117	5.7029	0.0824207	0.147494
YBX3	protein_coding	ENSG00000060138	-0.0832461	8.88793	0.195753	0.300325
STYK1	protein_coding	ENSG00000060140	-0.60861	2.3092	4.34154e-09	3.34105e-08
WNK1	protein_coding	ENSG00000060237	-0.101479	8.40569	0.133102	0.219501
CCAR1	protein_coding	ENSG00000060339	-0.294639	7.56722	8.71734e-06	4.14887e-05
OGFR	protein_coding	ENSG00000060491	0.0191448	7.09745	0.769326	0.850338
GNA15	protein_coding	ENSG00000060558	1.05471	-1.17654	0.000124642	0.000479748
CREB3L3	protein_coding	ENSG00000060566	0.119591	-3.61846	1	1
PIGV	protein_coding	ENSG00000060642	-0.179461	3.49593	0.031782	0.0664526
PTPRU	protein_coding	ENSG00000060656	-0.202327	5.7191	0.0017713	0.00527971
SNRNP40	protein_coding	ENSG00000060688	-0.278268	5.93217	4.67561e-05	0.000194679
RIMBP2	protein_coding	ENSG00000060709	-0.56405	1.13007	1.68784e-05	7.61045e-05
COL11A1	protein_coding	ENSG00000060718	0.192939	7.31421	0.0031991	0.00894034
QSER1	protein_coding	ENSG00000060749	0.0234473	7.60974	0.739436	0.827178
MPC1	protein_coding	ENSG00000060762	-0.0380599	4.16778	0.610434	0.720373
ACAA1	protein_coding	ENSG00000060971	-0.000240912	4.86829	0.999955	1
BCAT1	protein_coding	ENSG00000060982	-0.292787	7.53383	5.58112e-06	2.74464e-05
HDAC7	protein_coding	ENSG00000061273	-0.389735	6.93571	4.36162e-09	3.35435e-08
LZTS1	protein_coding	ENSG00000061337	-1.53758	2.94456	1.35563e-63	1.66597e-61
PRDM6	protein_coding	ENSG00000061455	-1.62426	-2.00484	1.10191e-06	6.07499e-06
SPAG4	protein_coding	ENSG00000061656	-0.200848	1.64147	0.0946624	0.165323
NCKAP1	protein_coding	ENSG00000061676	-0.134244	7.94037	0.0371745	0.0758326
MRPS35	protein_coding	ENSG00000061794	0.0782412	5.6337	0.303408	0.424179
GUCY1B1	protein_coding	ENSG00000061918	-0.612381	1.28558	8.23848e-06	3.93968e-05
SFSWAP	protein_coding	ENSG00000061936	0.186597	6.20974	0.00476283	0.0127102
TNK2	protein_coding	ENSG00000061938	0.258822	5.62306	0.000510096	0.00171746
MON2	protein_coding	ENSG00000061987	-0.335141	5.61493	6.64461e-07	3.78814e-06
CDH3	protein_coding	ENSG00000062038	1.16458	-1.10112	0.000240066	0.000870986
GPBP1	protein_coding	ENSG00000062194	0.0321653	6.65609	0.6287	0.735944
DGAT2	protein_coding	ENSG00000062282	-0.322419	3.27489	0.000197888	0.00073028
ZNF112	protein_coding	ENSG00000062370	-0.476057	2.57618	1.41183e-05	6.46393e-05
CS	protein_coding	ENSG00000062485	-0.0495019	7.92977	0.448652	0.573207
LTK	protein_coding	ENSG00000062524	-0.0595756	-0.439701	0.784048	0.861795
MRPS24	protein_coding	ENSG00000062582	-0.332396	0.660204	0.0275376	0.0587925
ELMO2	protein_coding	ENSG00000062598	0.0286631	6.19166	0.656686	0.75995
WAPL	protein_coding	ENSG00000062650	0.168963	7.35403	0.0128852	0.0305298
VMP1	protein_coding	ENSG00000062716	-0.0407467	8.00703	0.545736	0.662958
APPBP2	protein_coding	ENSG00000062725	-0.0836324	6.22493	0.197513	0.302371
POLD1	protein_coding	ENSG00000062822	-0.188256	6.54204	0.00327876	0.00913543
EIF4B	protein_coding	ENSG00000063046	-0.15276	9.34244	0.020016	0.0447033
SLC6A16	protein_coding	ENSG00000063127	-0.742933	2.57726	0.000145601	0.000552296
BICRA	protein_coding	ENSG00000063169	-0.216857	4.60055	0.00997156	0.0244637
SPHK2	protein_coding	ENSG00000063176	-0.0528286	3.91118	0.535657	0.653815
RPL18	protein_coding	ENSG00000063177	-0.058901	8.01604	0.397053	0.522842
CA11	protein_coding	ENSG00000063180	0.156748	4.27858	0.0333031	0.0691229
ISOC2	protein_coding	ENSG00000063241	0.0120976	5.12282	0.863316	0.922241
U2AF2	protein_coding	ENSG00000063244	0.0585095	8.41383	0.361868	0.486265
EPN1	protein_coding	ENSG00000063245	-0.166719	6.95077	0.00949643	0.0234293
MED29	protein_coding	ENSG00000063322	-0.0465888	5.30218	0.49128	0.61326
AHRR	protein_coding	ENSG00000063438	0.129677	3.12277	0.176396	0.276474
GSC2	protein_coding	ENSG00000063515	0.547147	-3.78524	0.60157	0.712356
ZNF275	protein_coding	ENSG00000063587	-0.22033	5.44062	0.00131431	0.00404209
MTMR1	protein_coding	ENSG00000063601	0.0780214	5.0752	0.250981	0.365523
GPC1	protein_coding	ENSG00000063660	-0.102158	8.79667	0.135529	0.222801
ADCK1	protein_coding	ENSG00000063761	-0.0324486	2.07144	0.777961	0.856433
HAGH	protein_coding	ENSG00000063854	-0.214361	4.26057	0.00463155	0.0123956
RNF4	protein_coding	ENSG00000063978	0.414392	6.17092	2.75155e-10	2.41093e-09
CASP8	protein_coding	ENSG00000064012	0.00817537	5.72762	0.893876	0.942803
LIMCH1	protein_coding	ENSG00000064042	0.917608	7.49855	3.74107e-36	1.80946e-34
INTS13	protein_coding	ENSG00000064102	-0.320367	6.09524	2.02802e-05	9.01605e-05
TM7SF3	protein_coding	ENSG00000064115	-0.285901	6.74985	9.30478e-06	4.40236e-05
DLX3	protein_coding	ENSG00000064195	0.3847	-0.31793	0.0731405	0.133526
SPA17	protein_coding	ENSG00000064199	-0.12663	3.71588	0.166368	0.263531
TSPAN32	protein_coding	ENSG00000064201	-0.374316	-4.11275	0.653754	0.757393
WISP2	protein_coding	ENSG00000064205	-0.722432	-2.48372	0.0444571	0.0884114
DMRT3	protein_coding	ENSG00000064218	-0.902491	-1.50758	0.000862071	0.0027642
ST3GAL6	protein_coding	ENSG00000064225	-0.0580477	2.46643	0.566255	0.682139
ATP2C2	protein_coding	ENSG00000064270	1.7661	-1.61337	3.25036e-05	0.000139532
NGFR	protein_coding	ENSG00000064300	1.02198	2.4848	1.58738e-16	2.50394e-15
CDON	protein_coding	ENSG00000064309	-0.584797	3.3786	1.08632e-10	9.95666e-10
TAF2	protein_coding	ENSG00000064313	-0.0220467	7.08618	0.742371	0.829152
HIPK2	protein_coding	ENSG00000064393	0.412589	6.4452	3.53312e-08	2.4081e-07
TNPO3	protein_coding	ENSG00000064419	-0.22857	6.27924	0.000803327	0.00258859
RFXANK	protein_coding	ENSG00000064490	-0.164036	4.07335	0.0286753	0.0608708
TMEM161A	protein_coding	ENSG00000064545	-0.338438	2.8361	0.00100397	0.00317525
LPAR2	protein_coding	ENSG00000064547	-0.69535	1.77421	2.44476e-07	1.47989e-06
CTSA	protein_coding	ENSG00000064601	-0.057726	6.63756	0.372597	0.497926
SUGP2	protein_coding	ENSG00000064607	-0.423157	6.75329	4.0536e-11	3.86996e-10
SLC12A2	protein_coding	ENSG00000064651	0.281381	6.34537	2.05744e-05	9.13166e-05
SNX24	protein_coding	ENSG00000064652	-0.64215	4.77643	4.44799e-18	7.97756e-17
EYA2	protein_coding	ENSG00000064655	-0.412782	2.24425	2.78612e-05	0.000121005
CNN2	protein_coding	ENSG00000064666	0.149822	7.13876	0.0203986	0.0454146
ABCA7	protein_coding	ENSG00000064687	-0.226884	2.60537	0.035441	0.0728385
SNCAIP	protein_coding	ENSG00000064692	1.78296	-0.148473	8.37885e-16	1.24484e-14
DDX20	protein_coding	ENSG00000064703	-0.179073	6.04123	0.00601718	0.015608
BTBD1	protein_coding	ENSG00000064726	0.0515345	6.56081	0.42908	0.554199
FAR2	protein_coding	ENSG00000064763	0.00441723	1.96592	0.995843	1
BCAS1	protein_coding	ENSG00000064787	2.58614	-1.55704	2.08547e-13	2.49047e-12
CHI3L2	protein_coding	ENSG00000064886	-0.278315	-0.296026	0.171029	0.269464
SBNO2	protein_coding	ENSG00000064932	0.604367	5.33494	6.48826e-17	1.06098e-15
PMS1	protein_coding	ENSG00000064933	-0.3596	4.39927	1.43924e-06	7.79207e-06
HMG20B	protein_coding	ENSG00000064961	-0.0218642	6.75406	0.742815	0.829302
CALCRL	protein_coding	ENSG00000064989	-0.943184	-1.67416	0.00149063	0.00452486
TAF11	protein_coding	ENSG00000064995	0.0695288	5.82536	0.308542	0.429603
ANKS1A	protein_coding	ENSG00000064999	0.435545	5.50795	8.48692e-11	7.87459e-10
AP3D1	protein_coding	ENSG00000065000	0.195109	7.06266	0.00226946	0.00657421
ZNF76	protein_coding	ENSG00000065029	0.14046	4.13314	0.0669596	0.124133
SLC9A3R2	protein_coding	ENSG00000065054	-0.193389	4.58715	0.00829219	0.0208121
NTHL1	protein_coding	ENSG00000065057	-0.552319	3.39968	3.90487e-09	3.01851e-08
UHRF1BP1	protein_coding	ENSG00000065060	-0.890416	6.3344	5.91538e-39	3.17336e-37
GNAI3	protein_coding	ENSG00000065135	0.113713	7.56447	0.0804925	0.144559
IPO5	protein_coding	ENSG00000065150	-0.0674734	7.6355	0.301859	0.422628
OAT	protein_coding	ENSG00000065154	-0.14897	7.23202	0.0212814	0.0470581
WDR3	protein_coding	ENSG00000065183	0.490701	7.28943	6.74717e-11	6.31879e-10
PKN2	protein_coding	ENSG00000065243	-0.194341	6.59637	0.00324626	0.00905426
WDR18	protein_coding	ENSG00000065268	-0.0923016	5.20624	0.187575	0.290349
TRAM2	protein_coding	ENSG00000065308	-0.36561	7.059	3.30792e-08	2.26357e-07
NTN1	protein_coding	ENSG00000065320	-0.248836	5.88424	0.00030507	0.00108014
GLP2R	protein_coding	ENSG00000065325	0.540663	4.89999	4.22686e-14	5.38975e-13
MCM10	protein_coding	ENSG00000065328	-0.103121	6.48912	0.123898	0.206958
DGKA	protein_coding	ENSG00000065357	-0.756062	4.35617	1.42313e-22	3.48363e-21
ERBB3	protein_coding	ENSG00000065361	-1.6806	1.48606	1.11977e-36	5.51571e-35
ANKRD44	protein_coding	ENSG00000065413	-0.638609	3.19453	2.49152e-13	2.95051e-12
KARS	protein_coding	ENSG00000065427	-0.0330933	7.82523	0.606938	0.717055
ADAT1	protein_coding	ENSG00000065457	-0.0178298	4.99986	0.817962	0.888034
PDIA5	protein_coding	ENSG00000065485	0.0277336	5.16234	0.686832	0.785329
TBC1D22B	protein_coding	ENSG00000065491	0.130585	5.33814	0.0538024	0.103592
NDUFB4	protein_coding	ENSG00000065518	-0.219654	6.29479	0.00234146	0.00676325
SPEN	protein_coding	ENSG00000065526	0.294282	6.97361	3.6687e-05	0.000155769
MYLK	protein_coding	ENSG00000065534	-0.248488	5.90588	0.000225309	0.000822276
ZC3H15	protein_coding	ENSG00000065548	0.197983	7.29482	0.0066467	0.0170647
MAP2K4	protein_coding	ENSG00000065559	0.0451211	5.43806	0.51535	0.635275
TMEM206	protein_coding	ENSG00000065600	-0.201008	3.6057	0.0164969	0.0378454
SNAP91	protein_coding	ENSG00000065609	-0.649705	-0.109633	0.000271775	0.000973563
SLK	protein_coding	ENSG00000065613	0.336113	6.83978	6.89109e-06	3.33975e-05
CYB5R4	protein_coding	ENSG00000065615	0.0217627	4.73142	0.752103	0.837128
COL17A1	protein_coding	ENSG00000065618	0.548549	4.55614	4.35477e-14	5.53819e-13
GSTO2	protein_coding	ENSG00000065621	0.158295	3.84644	0.0451121	0.089448
SEC61A2	protein_coding	ENSG00000065665	-0.272058	4.45395	0.000445485	0.00151946
PRKCQ	protein_coding	ENSG00000065675	-0.695764	3.39017	1.26954e-16	2.02379e-15
TLE2	protein_coding	ENSG00000065717	-0.262905	3.59018	0.00254665	0.00730079
ASB1	protein_coding	ENSG00000065802	0.516571	6.21779	8.79127e-15	1.19501e-13
FAM107B	protein_coding	ENSG00000065809	0.0393385	6.03693	0.559312	0.676
ME1	protein_coding	ENSG00000065833	-0.210337	4.63377	0.00360496	0.00993054
TBC1D1	protein_coding	ENSG00000065882	-0.285937	7.02395	1.35755e-05	6.23911e-05
CDK13	protein_coding	ENSG00000065883	0.198024	6.83513	0.00216897	0.00630813
MTHFD2	protein_coding	ENSG00000065911	-0.149898	8.1338	0.0324135	0.0675501
SLC9A7	protein_coding	ENSG00000065923	-0.00529784	5.46305	0.925045	0.964782
FOXJ2	protein_coding	ENSG00000065970	-0.663461	5.97671	2.1459e-24	5.86035e-23
YBX1	protein_coding	ENSG00000065978	0.0126853	11.0175	0.853669	0.915387
PDE4A	protein_coding	ENSG00000065989	-0.0533336	4.77464	0.453754	0.578009
PPP2R5A	protein_coding	ENSG00000066027	-0.395707	4.939	4.89807e-08	3.2754e-07
CTNNA2	protein_coding	ENSG00000066032	-0.168655	-0.30312	0.439675	0.564302
ELAVL1	protein_coding	ENSG00000066044	-0.0177999	6.52719	0.785876	0.863252
TIE1	protein_coding	ENSG00000066056	2.81268	1.89077	3.51543e-102	1.05845e-99
DIP2B	protein_coding	ENSG00000066084	-0.0816418	6.13165	0.258599	0.374377
SMARCD1	protein_coding	ENSG00000066117	-0.0156276	6.50205	0.807426	0.880022
KDM4A	protein_coding	ENSG00000066135	-0.585074	5.25228	1.8736e-17	3.21313e-16
NFYC	protein_coding	ENSG00000066136	-0.0841481	6.14203	0.205934	0.312187
ZMYND12	protein_coding	ENSG00000066185	0.0675153	-3.35179	1	1
SLC9A3	protein_coding	ENSG00000066230	0.999855	-1.95216	0.00319395	0.00892802
NGEF	protein_coding	ENSG00000066248	-0.0471633	1.66103	0.754069	0.838369
ASPM	protein_coding	ENSG00000066279	0.265985	7.35943	0.000268006	0.000961205
ELOVL1	protein_coding	ENSG00000066322	0.156151	7.01871	0.0153361	0.0354954
SPI1	protein_coding	ENSG00000066336	-0.558072	-3.16117	0.289291	0.408449
ZNRD1	protein_coding	ENSG00000066379	-0.0654846	3.0329	0.557148	0.674204
MPPED2	protein_coding	ENSG00000066382	0.119238	0.638517	0.401504	0.527433
ZBTB11	protein_coding	ENSG00000066422	-0.293159	6.04091	1.04777e-05	4.90716e-05
ATXN3	protein_coding	ENSG00000066427	0.0220937	4.12405	0.794189	0.869529
GOLGA5	protein_coding	ENSG00000066455	0.297777	5.18898	4.38658e-05	0.000183405
FGFR2	protein_coding	ENSG00000066468	-0.338484	4.56586	2.47115e-06	1.28781e-05
LRRC40	protein_coding	ENSG00000066557	-0.0789921	5.16004	0.268007	0.384829
ISOC1	protein_coding	ENSG00000066583	0.0265969	5.36042	0.688962	0.787091
EML1	protein_coding	ENSG00000066629	-0.535573	3.00091	3.70261e-08	2.51508e-07
TRMT11	protein_coding	ENSG00000066651	0.105719	4.0278	0.180492	0.281665
THUMPD1	protein_coding	ENSG00000066654	0.150041	5.85261	0.0277244	0.0591495
MSANTD3	protein_coding	ENSG00000066697	0.111736	6.31894	0.104782	0.180162
KIF26A	protein_coding	ENSG00000066735	-0.717514	3.85456	1.2922e-15	1.88867e-14
ATG2B	protein_coding	ENSG00000066739	0.0699141	3.93624	0.387006	0.51292
ARFGEF1	protein_coding	ENSG00000066777	-0.092961	6.46984	0.183107	0.285044
ZFAT	protein_coding	ENSG00000066827	0.201979	3.77558	0.0226	0.0495194
MTFR1	protein_coding	ENSG00000066855	-0.549042	5.03139	9.21977e-15	1.25127e-13
STAG3	protein_coding	ENSG00000066923	1.23224	-1.07612	0.000120939	0.000466613
FECH	protein_coding	ENSG00000066926	-0.0908732	4.41678	0.216623	0.325239
MYO9A	protein_coding	ENSG00000066933	-0.0695354	5.36158	0.327865	0.450064
PFKP	protein_coding	ENSG00000067057	0.29188	6.99762	9.36145e-06	4.42483e-05
IDI1	protein_coding	ENSG00000067064	-0.14388	5.52613	0.0426724	0.0854193
SP100	protein_coding	ENSG00000067066	-0.130729	5.26538	0.071454	0.130953
KLF6	protein_coding	ENSG00000067082	0.632346	6.50212	1.09238e-13	1.3404e-12
PLPP1	protein_coding	ENSG00000067113	-0.267646	3.54644	0.00113918	0.00355619
NEO1	protein_coding	ENSG00000067141	-0.136448	6.08501	0.0348267	0.0718028
TRAM1	protein_coding	ENSG00000067167	0.175373	7.88786	0.00959251	0.0236349
PHKA1	protein_coding	ENSG00000067177	-0.335785	4.59855	1.09392e-05	5.11241e-05
TNFRSF1A	protein_coding	ENSG00000067182	0.56541	6.74331	1.98868e-18	3.66218e-17
CACNB1	protein_coding	ENSG00000067191	0.188474	4.43506	0.0176033	0.0400048
EVI5	protein_coding	ENSG00000067208	-0.0297638	4.43617	0.716691	0.810237
STOML1	protein_coding	ENSG00000067221	-0.280822	2.52894	0.0112695	0.0271959
PKM	protein_coding	ENSG00000067225	0.0402491	11.4311	0.536491	0.654567
DHX29	protein_coding	ENSG00000067248	-0.160768	6.15665	0.0211425	0.046807
DNTTIP2	protein_coding	ENSG00000067334	0.54869	6.93896	2.11306e-15	3.0278e-14
METTL22	protein_coding	ENSG00000067365	-0.217305	4.59685	0.0025678	0.00735527
TP53BP1	protein_coding	ENSG00000067369	-0.110705	6.44232	0.0920855	0.16169
TRO	protein_coding	ENSG00000067445	-0.0714276	6.1199	0.267521	0.384336
RRP15	protein_coding	ENSG00000067533	0.838434	5.34519	3.03726e-29	1.06181e-27
RHOA	protein_coding	ENSG00000067560	0.0134285	8.68296	0.833032	0.899827
DHX8	protein_coding	ENSG00000067596	0.253143	6.12699	0.000264501	0.000949766
PMS2P4	transcribed_unprocessed_pseudogene	ENSG00000067601	-0.278917	1.43774	0.0267212	0.0572424
PRKCZ	protein_coding	ENSG00000067606	-0.157075	4.11945	0.0446478	0.0887027
IARS2	protein_coding	ENSG00000067704	-0.100891	7.15829	0.12727	0.211475
SYT1	protein_coding	ENSG00000067715	-0.000652073	2.27116	0.96519	0.995058
NAV3	protein_coding	ENSG00000067798	1.1453	5.75667	1.437e-60	1.62503e-58
IDH3G	protein_coding	ENSG00000067829	0.0131097	4.82984	0.845897	0.909682
ROGDI	protein_coding	ENSG00000067836	-0.569071	1.77459	6.22835e-05	0.000253545
PDZD4	protein_coding	ENSG00000067840	0.150432	4.5216	0.0380815	0.077446
ATP2B3	protein_coding	ENSG00000067842	-0.911349	0.207001	8.03267e-07	4.53228e-06
ROCK1	protein_coding	ENSG00000067900	-0.0457731	7.03028	0.503031	0.624125
CBFB	protein_coding	ENSG00000067955	0.974919	6.75596	6.02715e-48	4.41264e-46
PDK3	protein_coding	ENSG00000067992	-0.525005	2.3012	4.95147e-07	2.87271e-06
HYAL2	protein_coding	ENSG00000068001	0.104204	5.08347	0.124931	0.208322
HDAC4	protein_coding	ENSG00000068024	0.225986	0.714639	0.205452	0.31171
RASSF1	protein_coding	ENSG00000068028	-0.18516	4.36483	0.0157554	0.0363618
FGFR3	protein_coding	ENSG00000068078	-0.47733	2.52558	1.45927e-06	7.88987e-06
IFI35	protein_coding	ENSG00000068079	0.361271	-3.38747	0.725641	0.816639
HEATR6	protein_coding	ENSG00000068097	0.00224196	5.98072	0.977147	1
COASY	protein_coding	ENSG00000068120	-0.0489109	6.34354	0.44156	0.566158
PLEKHH3	protein_coding	ENSG00000068137	-1.1121	3.93321	4.60819e-46	3.14441e-44
MEF2A	protein_coding	ENSG00000068305	0.131781	5.82841	0.0506932	0.0985828
OTUD5	protein_coding	ENSG00000068308	0.265191	6.13362	5.90427e-05	0.00024129
TFE3	protein_coding	ENSG00000068323	-0.0860662	7.1975	0.179253	0.280174
TBC1D25	protein_coding	ENSG00000068354	-0.23792	4.42444	0.00116529	0.0036311
ACSL4	protein_coding	ENSG00000068366	0.61795	6.33185	4.09903e-19	7.95596e-18
INPP5A	protein_coding	ENSG00000068383	-0.164646	4.52318	0.0266481	0.0571264
GPKOW	protein_coding	ENSG00000068394	-0.172801	5.22449	0.0160461	0.036967
GRIPAP1	protein_coding	ENSG00000068400	0.0645395	6.02152	0.336972	0.459789
FTSJ1	protein_coding	ENSG00000068438	0.290169	6.93421	4.74644e-06	2.36311e-05
PRR11	protein_coding	ENSG00000068489	-0.278346	8.34227	4.3126e-05	0.000180406
REEP1	protein_coding	ENSG00000068615	-0.653158	2.41964	1.35782e-11	1.36787e-10
ATP11A	protein_coding	ENSG00000068650	0.101562	7.20575	0.11759	0.198055
POLR1A	protein_coding	ENSG00000068654	0.212234	7.35845	0.0021834	0.00634703
LAPTM4A	protein_coding	ENSG00000068697	-0.0605879	7.43607	0.344896	0.468293
TTC7A	protein_coding	ENSG00000068724	0.162959	4.50166	0.0344681	0.071167
IP6K2	protein_coding	ENSG00000068745	-0.458894	5.74931	4.17369e-12	4.42481e-11
SRBD1	protein_coding	ENSG00000068784	0.0129858	5.06206	0.841076	0.9062
KIF2A	protein_coding	ENSG00000068796	0.0972817	6.59137	0.137933	0.226136
RASGRP2	protein_coding	ENSG00000068831	0.547555	0.345001	0.00143532	0.00437517
PSME4	protein_coding	ENSG00000068878	0.0692784	7.59175	0.28271	0.400897
IFT80	protein_coding	ENSG00000068885	-0.104612	3.29771	0.233358	0.345073
SIRT2	protein_coding	ENSG00000068903	-0.310391	3.94117	4.64003e-05	0.000193364
ERLEC1	protein_coding	ENSG00000068912	0.164724	6.40409	0.0108968	0.0264029
PPP2R5B	protein_coding	ENSG00000068971	-1.09314	3.05868	3.48437e-34	1.51769e-32
PYGM	protein_coding	ENSG00000068976	0.191029	0.470478	0.373363	0.498707
PAGE1	protein_coding	ENSG00000068985	0.284965	-1.2778	0.345488	0.46899
PITX1	protein_coding	ENSG00000069011	-0.654421	4.39459	4.91645e-18	8.79811e-17
TRPC7	protein_coding	ENSG00000069018	3.93726	-3.5875	4.80346e-05	0.000199622
MAST4	protein_coding	ENSG00000069020	0.394947	5.1699	8.66941e-09	6.41536e-08
ADGRF5	protein_coding	ENSG00000069122	0.948647	2.35786	1.41338e-16	2.24565e-15
SDK2	protein_coding	ENSG00000069188	0.138434	4.96964	0.0719519	0.131665
NUP133	protein_coding	ENSG00000069248	-0.274456	5.93682	4.72697e-05	0.000196681
NUCKS1	protein_coding	ENSG00000069275	0.246693	8.83046	0.000326205	0.00114839
VPS35	protein_coding	ENSG00000069329	0.0221921	6.80734	0.737921	0.826278
DNAJA2	protein_coding	ENSG00000069345	0.429908	6.7913	1.6159e-10	1.45178e-09
BCL3	protein_coding	ENSG00000069399	1.59644	3.74845	1.05378e-69	1.62707e-67
KCNAB2	protein_coding	ENSG00000069424	0.20189	4.75048	0.00502345	0.0133289
ABCC9	protein_coding	ENSG00000069431	0.256989	2.35033	0.0107622	0.0261135
GAL	protein_coding	ENSG00000069482	0.570667	-2.81931	0.251593	0.366149
CLEC2D	protein_coding	ENSG00000069493	0.0145046	1.92985	0.96159	0.992182
FUNDC1	protein_coding	ENSG00000069509	-0.131089	4.37096	0.0950407	0.165911
MAOB	protein_coding	ENSG00000069535	1.19581	3.44352	2.61307e-28	8.70554e-27
RORA	protein_coding	ENSG00000069667	-0.256916	3.70418	0.00146676	0.00446084
DRD4	protein_coding	ENSG00000069696	0.722673	-0.763836	0.0111348	0.0269145
TGFBR3	protein_coding	ENSG00000069702	-1.68036	2.4068	1.83803e-59	1.99427e-57
ATP1B3	protein_coding	ENSG00000069849	-0.0439389	6.64053	0.502319	0.623517
NEDD4	protein_coding	ENSG00000069869	0.185791	6.33408	0.00470559	0.0125742
PIGB	protein_coding	ENSG00000069943	-0.271621	3.03046	0.00465314	0.0124492
MAPK6	protein_coding	ENSG00000069956	0.119957	7.11553	0.0750487	0.136389
GNB5	protein_coding	ENSG00000069966	-0.338728	4.95146	6.8512e-07	3.89761e-06
RAB27A	protein_coding	ENSG00000069974	0.184372	4.27425	0.0148366	0.0345183
HDHD5	protein_coding	ENSG00000069998	-0.127631	5.19278	0.072373	0.132325
UFD1	protein_coding	ENSG00000070010	-0.319638	7.44736	5.45619e-07	3.15013e-06
LRP6	protein_coding	ENSG00000070018	-0.628093	7.38905	7.43289e-20	1.51213e-18
PHRF1	protein_coding	ENSG00000070047	0.376018	6.25652	7.09915e-09	5.31707e-08
ELP1	protein_coding	ENSG00000070061	-0.13281	5.72174	0.0447836	0.0888993
NUCB2	protein_coding	ENSG00000070081	0.174339	7.04863	0.0120311	0.0287579
PFN2	protein_coding	ENSG00000070087	-0.219575	7.00872	0.000662533	0.00217476
PTPN3	protein_coding	ENSG00000070159	-0.180908	4.87913	0.0101414	0.0248071
SPTB	protein_coding	ENSG00000070182	0.221404	5.78729	0.000811585	0.00261415
DAPP1	protein_coding	ENSG00000070190	0.0210788	-1.09	1	1
SLC44A1	protein_coding	ENSG00000070214	-0.303372	5.63438	7.44033e-06	3.58216e-05
TMEM260	protein_coding	ENSG00000070269	-0.00122001	4.22919	0.98269	1
SMG6	protein_coding	ENSG00000070366	0.065439	5.68464	0.32266	0.444495
EXOC5	protein_coding	ENSG00000070367	-0.107368	7.44809	0.111861	0.190086
CLTCL1	protein_coding	ENSG00000070371	-0.596623	5.09175	3.03675e-19	5.96048e-18
FSTL3	protein_coding	ENSG00000070404	0.352473	7.26524	4.39519e-08	2.95635e-07
DGCR2	protein_coding	ENSG00000070413	-0.433304	5.7944	1.88208e-09	1.50911e-08
RNF126	protein_coding	ENSG00000070423	0.0980114	4.94381	0.16521	0.262063
MNT	protein_coding	ENSG00000070444	0.16995	4.53952	0.025447	0.0549379
ZXDC	protein_coding	ENSG00000070476	-0.523905	4.82733	7.62325e-14	9.49929e-13
JMJD6	protein_coding	ENSG00000070495	-0.00697998	5.74941	0.924	0.96399
POLB	protein_coding	ENSG00000070501	-0.123181	4.18009	0.131355	0.21711
WIPI1	protein_coding	ENSG00000070540	-0.340099	4.00913	1.01184e-05	4.75927e-05
FRMPD1	protein_coding	ENSG00000070601	-0.569798	-1.07561	0.0390151	0.0790707
GBA2	protein_coding	ENSG00000070610	-0.0634118	6.20459	0.332265	0.454861
NDST1	protein_coding	ENSG00000070614	-0.149219	8.42045	0.0236389	0.0515146
ASNS	protein_coding	ENSG00000070669	-1.31688	1.79387	4.74844e-31	1.80119e-29
AP3M2	protein_coding	ENSG00000070718	-0.398164	5.2696	4.25776e-09	3.27762e-08
CNGB1	protein_coding	ENSG00000070729	1.25093	-1.59764	9.67717e-05	0.000380189
CHAT	protein_coding	ENSG00000070748	0.675845	-0.281414	0.000524036	0.00175972
PABPC1	protein_coding	ENSG00000070756	-0.0512792	10.7651	0.449766	0.574143
TESK2	protein_coding	ENSG00000070759	-0.466059	2.40284	5.50545e-05	0.000226412
CFAP20	protein_coding	ENSG00000070761	0.280683	5.91088	6.53133e-05	0.000265072
CSNK2A2	protein_coding	ENSG00000070770	0.443672	7.05527	9.63357e-12	9.85324e-11
PTPN21	protein_coding	ENSG00000070778	-0.109054	6.08665	0.0974018	0.16948
EIF2B3	protein_coding	ENSG00000070785	0.0150916	5.22117	0.822018	0.891195
CAMK2A	protein_coding	ENSG00000070808	2.42102	-0.182049	1.82723e-29	6.45345e-28
TCOF1	protein_coding	ENSG00000070814	0.302064	8.23385	3.13519e-06	1.60846e-05
CDC42	protein_coding	ENSG00000070831	0.510853	-0.214006	0.025521	0.0550877
OSBPL3	protein_coding	ENSG00000070882	-0.130032	6.33352	0.0442324	0.0880372
EPHA8	protein_coding	ENSG00000070886	-0.353754	-0.137272	0.0841711	0.150124
SLC12A3	protein_coding	ENSG00000070915	1.90005	-2.42968	1.76962e-05	7.95535e-05
RAD18	protein_coding	ENSG00000070950	0.28926	5.27016	2.29157e-05	0.000100872
ATP2B1	protein_coding	ENSG00000070961	0.733892	7.05459	2.34698e-29	8.22877e-28
NCK2	protein_coding	ENSG00000071051	-0.247706	6.48898	9.38638e-05	0.000369669
MAP4K4	protein_coding	ENSG00000071054	0.144702	8.81746	0.0348891	0.0718882
MGAT4A	protein_coding	ENSG00000071073	-1.02601	2.62663	3.30233e-26	9.89343e-25
RPL31	protein_coding	ENSG00000071082	-0.134611	7.66176	0.0776035	0.14007
WDR1	protein_coding	ENSG00000071127	0.432169	8.2601	3.1061e-10	2.70977e-09
SNX13	protein_coding	ENSG00000071189	-0.228115	5.94514	0.00075928	0.00246115
MS4A12	protein_coding	ENSG00000071203	-0.849761	-3.82525	0.12227	0.204764
ARHGAP10	protein_coding	ENSG00000071205	-0.690782	4.1905	6.4618e-19	1.2343e-17
RPS6KA2	protein_coding	ENSG00000071242	-0.306827	3.1102	0.000374837	0.00130134
ING3	protein_coding	ENSG00000071243	0.292965	3.47417	0.00101261	0.00320004
VASH1	protein_coding	ENSG00000071246	-0.265581	4.34573	0.000443061	0.00151269
LMCD1	protein_coding	ENSG00000071282	0.109996	4.96962	0.13044	0.215865
BUD23	protein_coding	ENSG00000071462	0.0253915	6.84801	0.68976	0.787666
SEL1L	protein_coding	ENSG00000071537	0.161828	8.06953	0.0141784	0.0331536
TRIP13	protein_coding	ENSG00000071539	-0.00613509	6.5238	0.932769	0.970649
ATP6AP1	protein_coding	ENSG00000071553	-0.113393	6.75375	0.0795549	0.143088
TCF3	protein_coding	ENSG00000071564	-0.12098	7.32967	0.0589882	0.111725
TRIB2	protein_coding	ENSG00000071575	0.230916	6.09436	0.00130663	0.00402208
DAZAP1	protein_coding	ENSG00000071626	0.0744979	7.62118	0.249233	0.363681
MBD3	protein_coding	ENSG00000071655	0.0210888	5.59111	0.773712	0.853308
HLTF	protein_coding	ENSG00000071794	-0.44488	5.95875	7.08184e-11	6.62191e-10
FAM50A	protein_coding	ENSG00000071859	-0.12061	6.26956	0.0613071	0.115357
FAM3A	protein_coding	ENSG00000071889	-0.238375	4.27503	0.00130411	0.00401534
CPSF1	protein_coding	ENSG00000071894	-0.0284402	7.68982	0.657056	0.760268
MYO3B	protein_coding	ENSG00000071909	0.0469726	-2.39124	1	1
CYBRD1	protein_coding	ENSG00000071967	-0.281154	5.77344	2.0369e-05	9.04885e-05
CDH19	protein_coding	ENSG00000071991	6.85011	-2.77018	1.83456e-06	9.77848e-06
PDCD2	protein_coding	ENSG00000071994	-0.237959	6.42684	0.000209414	0.000769045
SLC6A15	protein_coding	ENSG00000072041	0.318305	4.23959	3.21619e-05	0.000138164
RDH11	protein_coding	ENSG00000072042	-0.352646	7.24582	1.5821e-07	9.84706e-07
PRKACA	protein_coding	ENSG00000072062	-0.167896	5.96674	0.0112784	0.0272098
ADGRL1	protein_coding	ENSG00000072071	-0.192829	5.69764	0.007055	0.0180095
ACTN1	protein_coding	ENSG00000072110	0.486013	9.84087	6.03908e-14	7.58411e-13
ZFYVE26	protein_coding	ENSG00000072121	-0.195024	5.83853	0.00440782	0.0118521
RPS6KA6	protein_coding	ENSG00000072133	0.467703	4.01392	4.70403e-09	3.60263e-08
EPN2	protein_coding	ENSG00000072134	0.657574	5.83358	3.82201e-21	8.53205e-20
PTPN18	protein_coding	ENSG00000072135	-0.654422	5.81495	3.58621e-23	9.12156e-22
LIMS2	protein_coding	ENSG00000072163	-0.347522	3.21231	0.000128798	0.00049369
ASIC4	protein_coding	ENSG00000072182	0.415515	-1.65359	0.258203	0.373893
SPEG	protein_coding	ENSG00000072195	-0.30792	6.62307	8.77469e-06	4.17467e-05
LNX1	protein_coding	ENSG00000072201	-1.05303	2.16078	1.87315e-23	4.84625e-22
ALDH3A2	protein_coding	ENSG00000072210	-0.0839095	5.33123	0.217727	0.32661
TFRC	protein_coding	ENSG00000072274	0.172836	9.56345	0.0107183	0.0260306
SREBF1	protein_coding	ENSG00000072310	-0.404004	6.56329	2.34028e-08	1.6363e-07
AFF4	protein_coding	ENSG00000072364	0.255445	8.29025	0.000144407	0.000548458
UBE2D1	protein_coding	ENSG00000072401	0.0270768	5.35088	0.68691	0.78538
MPP5	protein_coding	ENSG00000072415	-0.745054	7.39065	1.50176e-29	5.33523e-28
RHOBTB1	protein_coding	ENSG00000072422	-0.253988	5.15531	0.000389721	0.001347
SMC1A	protein_coding	ENSG00000072501	0.0688049	8.21605	0.312959	0.434205
HSD17B10	protein_coding	ENSG00000072506	-0.111492	6.00841	0.0950687	0.165948
MARK2	protein_coding	ENSG00000072518	0.250258	5.51388	0.000346201	0.0012117
HMMR	protein_coding	ENSG00000072571	0.170283	6.75749	0.0176583	0.0401184
CHFR	protein_coding	ENSG00000072609	0.198948	3.4529	0.0201889	0.0450184
TRHDE	protein_coding	ENSG00000072657	0.0894218	3.47587	0.329803	0.452183
P4HA2	protein_coding	ENSG00000072682	0.145041	6.55192	0.023659	0.0515536
NFATC3	protein_coding	ENSG00000072736	-0.234306	5.26694	0.00101695	0.0032125
TRNT1	protein_coding	ENSG00000072756	0.124455	5.4049	0.0763948	0.138334
ACADVL	protein_coding	ENSG00000072778	0.116751	7.671	0.0760058	0.137787
STK10	protein_coding	ENSG00000072786	0.555197	6.33677	2.98476e-17	5.0346e-16
FBXW11	protein_coding	ENSG00000072803	-0.0955664	6.24856	0.151979	0.24487
ACAP1	protein_coding	ENSG00000072818	0.127208	1.16483	0.409285	0.534768
CRMP1	protein_coding	ENSG00000072832	0.0431757	6.04612	0.514564	0.634434
EVC	protein_coding	ENSG00000072840	0.0810266	4.26251	0.370503	0.495795
DERL2	protein_coding	ENSG00000072849	0.230868	5.1638	0.000773159	0.00250142
SIDT1	protein_coding	ENSG00000072858	0.252697	-2.6534	0.582023	0.695845
NDE1	protein_coding	ENSG00000072864	0.0569015	5.9372	0.400845	0.52674
MRVI1	protein_coding	ENSG00000072952	0.865751	-3.74693	0.301846	0.422628
TMEM38A	protein_coding	ENSG00000072954	-0.29067	3.17462	0.000694602	0.00226798
AP1M1	protein_coding	ENSG00000072958	-0.120879	5.51213	0.0771985	0.139506
PVR	protein_coding	ENSG00000073008	0.344873	7.24814	7.71378e-08	5.02711e-07
XRCC1	protein_coding	ENSG00000073050	-0.0363743	5.24428	0.592396	0.705092
SCARB1	protein_coding	ENSG00000073060	0.0927968	6.92857	0.153232	0.246328
MCM2	protein_coding	ENSG00000073111	-0.251501	7.17538	8.64511e-05	0.000343338
MOV10L1	protein_coding	ENSG00000073146	-1.15049	1.55579	3.26617e-20	6.81735e-19
PANX2	protein_coding	ENSG00000073150	0.0953148	3.16378	0.292514	0.411866
SELENOO	protein_coding	ENSG00000073169	-0.203538	4.62914	0.0161356	0.0371531
TP63	protein_coding	ENSG00000073282	1.58558	-1.43787	5.36055e-07	3.09714e-06
ALPK1	protein_coding	ENSG00000073331	-0.645562	3.69469	1.12462e-13	1.37576e-12
LLGL2	protein_coding	ENSG00000073350	-1.15408	0.171774	1.72569e-11	1.71905e-10
PDE8A	protein_coding	ENSG00000073417	0.14419	5.73952	0.0365061	0.0747024
CLCN4	protein_coding	ENSG00000073464	-0.30311	4.2124	0.000110237	0.000428133
NLE1	protein_coding	ENSG00000073536	-0.0113784	5.22198	0.870848	0.927203
SDHA	protein_coding	ENSG00000073578	-0.30867	6.74504	1.27214e-06	6.94514e-06
SMARCE1	protein_coding	ENSG00000073584	-0.0253475	2.65585	0.840673	0.90592
GSDMB	protein_coding	ENSG00000073605	-0.121523	4.20068	0.171944	0.270747
KDM5A	protein_coding	ENSG00000073614	-0.0901103	6.23366	0.198215	0.303272
ADAM11	protein_coding	ENSG00000073670	-0.193587	2.53186	0.0942073	0.1646
PPP2R3A	protein_coding	ENSG00000073711	0.603801	5.6064	6.07425e-18	1.08058e-16
FERMT2	protein_coding	ENSG00000073712	0.356376	7.42818	1.90649e-07	1.17387e-06
ABCB11	protein_coding	ENSG00000073734	1.17962	-3.61665	0.175139	0.274831
DHRS9	protein_coding	ENSG00000073737	0.0758302	-2.678	1	1
CD5L	protein_coding	ENSG00000073754	0.574363	-3.97165	0.674822	0.774758
PTGS2	protein_coding	ENSG00000073756	0.291322	2.00636	0.0181372	0.0410786
IGF2BP2	protein_coding	ENSG00000073792	0.00952159	7.28296	0.88237	0.934966
MAP3K13	protein_coding	ENSG00000073803	-0.289525	4.67388	0.000106565	0.000415478
ST6GAL1	protein_coding	ENSG00000073849	-0.175097	2.6642	0.0774157	0.139826
TBX21	protein_coding	ENSG00000073861	1.08584	-3.19522	0.0933239	0.163353
VDAC1P1	processed_pseudogene	ENSG00000073905	0.442861	-1.37942	0.26603	0.382528
FRY	protein_coding	ENSG00000073910	0.169742	1.56187	0.203394	0.309271
PICALM	protein_coding	ENSG00000073921	0.526607	7.6021	1.49908e-14	2.00047e-13
NSF	protein_coding	ENSG00000073969	-0.110298	5.28465	0.106531	0.182517
GLI2	protein_coding	ENSG00000074047	0.127787	6.16701	0.0811044	0.145517
CLASP1	protein_coding	ENSG00000074054	5.13388e-05	6.7912	0.998675	1
MRPS34	protein_coding	ENSG00000074071	0.0360752	7.07526	0.615751	0.725049
NOTCH3	protein_coding	ENSG00000074181	-0.0362228	6.00051	0.618493	0.727495
CLNS1A	protein_coding	ENSG00000074201	0.0259553	7.08977	0.696331	0.793206
PPP2R2C	protein_coding	ENSG00000074211	0.0379308	6.21868	0.55845	0.675304
TEAD2	protein_coding	ENSG00000074219	-0.42499	4.80042	2.58942e-09	2.04362e-08
EED	protein_coding	ENSG00000074266	-9.01347e-05	4.75671	1	1
CDHR2	protein_coding	ENSG00000074276	0.460128	-3.80686	0.556142	0.673358
SNCB	protein_coding	ENSG00000074317	-0.530994	1.15762	0.000472545	0.00160132
TSG101	protein_coding	ENSG00000074319	-0.0566125	5.26194	0.411133	0.536484
NCBP3	protein_coding	ENSG00000074356	0.172777	5.85339	0.00920518	0.0228018
ATP2A3	protein_coding	ENSG00000074370	-0.282001	1.64549	0.019148	0.0430562
CA12	protein_coding	ENSG00000074410	0.259319	4.85019	0.000233765	0.000850429
MGLL	protein_coding	ENSG00000074416	0.293475	5.78582	2.40015e-05	0.000105324
NTN4	protein_coding	ENSG00000074527	0.236733	4.41292	0.000931375	0.00296433
BCS1L	protein_coding	ENSG00000074582	0.0454909	4.701	0.535242	0.653407
NUAK1	protein_coding	ENSG00000074590	-0.563303	6.16063	2.03063e-17	3.47384e-16
DPP8	protein_coding	ENSG00000074603	0.299236	5.71291	5.15944e-06	2.55185e-05
SLC24A1	protein_coding	ENSG00000074621	0.391624	4.32729	8.16518e-07	4.59628e-06
ZNF532	protein_coding	ENSG00000074657	0.281055	6.98409	2.34315e-05	0.000103029
SCARF1	protein_coding	ENSG00000074660	2.15051	0.49931	1.73476e-29	6.13585e-28
LMAN1	protein_coding	ENSG00000074695	0.0954267	8.15516	0.136459	0.224041
HACD3	protein_coding	ENSG00000074696	-0.137498	7.95513	0.0332053	0.0689496
IPCEF1	protein_coding	ENSG00000074706	-0.394598	-3.05016	0.461421	0.585022
ZZEF1	protein_coding	ENSG00000074755	-0.00252688	5.23897	0.963297	0.993471
ENO1	protein_coding	ENSG00000074800	-0.0224428	11.3344	0.733498	0.823368
MYDGF	protein_coding	ENSG00000074842	0.0622492	6.58825	0.347144	0.470841
ANO8	protein_coding	ENSG00000074855	-0.859532	3.12921	6.34629e-20	1.29765e-18
TUBE1	protein_coding	ENSG00000074935	-0.313009	4.41504	0.000161824	0.000608642
ARHGEF10L	protein_coding	ENSG00000074964	-0.484928	3.60685	5.97965e-09	4.5151e-08
TXK	protein_coding	ENSG00000074966	-0.911174	-1.98564	0.00866549	0.0216117
WSCD2	protein_coding	ENSG00000075035	1.47623	-3.07242	0.0050268	0.0133325
KCNQ2	protein_coding	ENSG00000075043	0.790651	-1.30589	0.00324475	0.00905215
TACR2	protein_coding	ENSG00000075073	0.41054	-3.19683	0.42831	0.553396
ACTR6	protein_coding	ENSG00000075089	-0.0836691	3.69484	0.358526	0.482959
TIPIN	protein_coding	ENSG00000075131	0.179354	4.74749	0.0187283	0.0422347
SRI	protein_coding	ENSG00000075142	-0.162598	5.78106	0.0223399	0.0490655
EIF4G3	protein_coding	ENSG00000075151	0.0136619	5.88456	0.838208	0.903918
NUP37	protein_coding	ENSG00000075188	-0.0130741	4.68059	0.881808	0.934535
SEMA3A	protein_coding	ENSG00000075213	1.66439	3.53158	5.67237e-78	1.051e-75
GTSE1	protein_coding	ENSG00000075218	-0.137591	7.54686	0.0336524	0.0697277
SEMA3C	protein_coding	ENSG00000075223	0.65083	6.63328	3.35974e-22	7.99666e-21
TTC38	protein_coding	ENSG00000075234	-0.375417	4.17997	1.12674e-06	6.20194e-06
ACAT1	protein_coding	ENSG00000075239	-0.166873	5.67552	0.0242081	0.0525695
GRAMD4	protein_coding	ENSG00000075240	0.150537	3.82785	0.0818481	0.146676
CELSR1	protein_coding	ENSG00000075275	-0.516752	-0.741246	0.0206555	0.0458891
ZNF638	protein_coding	ENSG00000075292	-0.32783	7.49714	1.15663e-06	6.3491e-06
SLC25A40	protein_coding	ENSG00000075303	-0.660366	4.20759	4.52399e-16	6.87464e-15
TIMM21	protein_coding	ENSG00000075336	-0.0696937	5.817	0.317287	0.438896
ADD2	protein_coding	ENSG00000075340	0.0987159	3.58706	0.311005	0.432164
FGF4	protein_coding	ENSG00000075388	0.911963	-2.31672	0.0191704	0.0430944
RASAL2	protein_coding	ENSG00000075391	0.157771	6.19099	0.0195983	0.0439211
VPS9D1	protein_coding	ENSG00000075399	0.0170158	4.25575	0.891551	0.941052
ZNF37A	protein_coding	ENSG00000075407	-0.151134	5.78593	0.0288543	0.0612185
MARK3	protein_coding	ENSG00000075413	-0.0306847	5.91745	0.645663	0.750729
SLC25A3	protein_coding	ENSG00000075415	-0.0472985	7.86206	0.462452	0.586051
FNDC3B	protein_coding	ENSG00000075420	0.160752	6.97488	0.021444	0.0473829
FOSL2	protein_coding	ENSG00000075426	0.464817	8.21848	1.73855e-12	1.89658e-11
CACNG5	protein_coding	ENSG00000075429	0.802038	-2.96591	0.217973	0.326878
FRYL	protein_coding	ENSG00000075539	-0.30379	6.80465	1.67673e-05	7.56742e-05
TMEM131	protein_coding	ENSG00000075568	-0.272411	6.90137	7.14509e-05	0.000288233
FSCN1	protein_coding	ENSG00000075618	0.447134	9.30435	1.4151e-11	1.42261e-10
ACTB	protein_coding	ENSG00000075624	0.227735	12.122	0.000544788	0.00182178
MOCOS	protein_coding	ENSG00000075643	-0.468554	4.26916	1.47485e-09	1.1937e-08
PLD1	protein_coding	ENSG00000075651	-0.961214	4.10924	6.71833e-36	3.2108e-34
ATP12A	protein_coding	ENSG00000075673	-0.592827	-3.5333	0.262865	0.379034
WDR62	protein_coding	ENSG00000075702	-0.384905	6.1442	1.0005e-08	7.32936e-08
DLG1	protein_coding	ENSG00000075711	-0.157438	6.8871	0.0223117	0.0490138
RAB7A	protein_coding	ENSG00000075785	0.151092	7.45247	0.0211447	0.0468074
BCAP29	protein_coding	ENSG00000075790	-0.0599585	5.86224	0.369197	0.494349
SEC31B	protein_coding	ENSG00000075826	-0.761199	2.61716	3.04998e-05	0.000131728
SART3	protein_coding	ENSG00000075856	-0.0293872	6.09122	0.671471	0.771868
ARHGAP15	protein_coding	ENSG00000075884	-0.257519	-2.64073	0.710953	0.805377
TUBA3D	protein_coding	ENSG00000075886	0.381135	-0.61937	0.291929	0.411234
PAX2	protein_coding	ENSG00000075891	-0.821651	0.666967	1.36038e-07	8.56892e-07
EXOSC7	protein_coding	ENSG00000075914	0.0947371	4.28886	0.226018	0.336596
KIFAP3	protein_coding	ENSG00000075945	0.0990683	3.69339	0.216239	0.324763
MKRN2	protein_coding	ENSG00000075975	-0.44456	4.94344	7.3697e-10	6.18516e-09
MCM6	protein_coding	ENSG00000076003	-0.240488	6.15647	0.000267292	0.000958789
REXO2	protein_coding	ENSG00000076043	-0.184058	6.55242	0.0114965	0.0276667
RBM7	protein_coding	ENSG00000076053	0.295579	5.04652	0.000171873	0.000642644
RBMS2	protein_coding	ENSG00000076067	-0.300344	6.50493	2.7304e-06	1.41618e-05
BAZ2A	protein_coding	ENSG00000076108	0.0491697	7.57685	0.449303	0.573796
PTPN23	protein_coding	ENSG00000076201	0.00379173	5.98684	0.968226	0.997334
MLH1	protein_coding	ENSG00000076242	0.0778146	6.07212	0.248609	0.363158
UNG	protein_coding	ENSG00000076248	-0.306261	5.71031	3.20612e-06	1.64031e-05
FMO4	protein_coding	ENSG00000076258	0.13889	0.208211	0.392765	0.518726
KLHL20	protein_coding	ENSG00000076321	-0.203567	4.39796	0.0111859	0.0270247
SLC46A1	protein_coding	ENSG00000076351	-0.269371	4.97653	0.000153427	0.000579065
PLXNA2	protein_coding	ENSG00000076356	1.30311	5.47667	1.29726e-57	1.32403e-55
SPAG5	protein_coding	ENSG00000076382	-0.0966036	7.46789	0.145539	0.236258
ANKRD13A	protein_coding	ENSG00000076513	1.35653	5.71406	7.95284e-80	1.57017e-77
TPD52	protein_coding	ENSG00000076554	-0.0171095	5.2495	0.824594	0.89313
ACACB	protein_coding	ENSG00000076555	-0.929873	2.11532	1.07796e-17	1.88425e-16
TRAF4	protein_coding	ENSG00000076604	0.10962	6.18469	0.099369	0.172306
PAG1	protein_coding	ENSG00000076641	-0.129791	2.68902	0.16243	0.258537
GPATCH1	protein_coding	ENSG00000076650	-0.333564	4.01461	1.85375e-05	8.30103e-05
ICAM3	protein_coding	ENSG00000076662	0.00336439	1.4507	0.942592	0.977576
NT5C2	protein_coding	ENSG00000076685	-0.22969	5.85756	0.000470115	0.00159398
MCAM	protein_coding	ENSG00000076706	0.155865	8.34008	0.0137668	0.0323513
GPC4	protein_coding	ENSG00000076716	-0.224952	5.04548	0.00160462	0.00482951
MBNL3	protein_coding	ENSG00000076770	-0.140216	1.69234	0.24605	0.360162
CAMSAP3	protein_coding	ENSG00000076826	-0.607763	1.72512	1.46548e-06	7.9193e-06
RAP1GAP	protein_coding	ENSG00000076864	0.264591	2.39784	0.0105909	0.0257627
XAB2	protein_coding	ENSG00000076924	0.0550751	5.57671	0.399515	0.525337
ARHGEF1	protein_coding	ENSG00000076928	0.112608	6.18815	0.0947247	0.165408
STXBP2	protein_coding	ENSG00000076944	-0.210845	2.45577	0.0647742	0.12076
MAP2K7	protein_coding	ENSG00000076984	0.166313	5.48408	0.0150113	0.0348541
DGKD	protein_coding	ENSG00000077044	0.584773	7.3815	1.68755e-17	2.90966e-16
CTTNBP2	protein_coding	ENSG00000077063	0.128832	1.91712	0.27276	0.389862
RARB	protein_coding	ENSG00000077092	-0.594278	-0.185239	0.0014987	0.00454648
TOP2B	protein_coding	ENSG00000077097	-0.110039	7.41873	0.106306	0.182197
TM9SF3	protein_coding	ENSG00000077147	0.295346	8.37132	4.37592e-06	2.19269e-05
NFKB2	protein_coding	ENSG00000077150	1.04712	6.63627	2.90388e-50	2.31608e-48
UBE2T	protein_coding	ENSG00000077152	-0.119821	5.22358	0.0879703	0.155762
PPP1R12B	protein_coding	ENSG00000077157	-0.441313	4.09423	2.49098e-08	1.73411e-07
DNAJC10	protein_coding	ENSG00000077232	0.177746	8.12535	0.00616754	0.015967
GTF3C1	protein_coding	ENSG00000077235	-0.0736584	7.21269	0.265067	0.381561
IL4R	protein_coding	ENSG00000077238	1.1887	5.36336	2.04663e-65	2.73874e-63
USP33	protein_coding	ENSG00000077254	-0.347071	5.99777	2.35067e-07	1.42621e-06
PAK3	protein_coding	ENSG00000077264	0.0768373	3.38467	0.354256	0.478573
CAPN6	protein_coding	ENSG00000077274	-0.411239	0.803503	0.00401024	0.010911
DCX	protein_coding	ENSG00000077279	-0.415869	-3.4228	0.505559	0.626184
SNRPA	protein_coding	ENSG00000077312	-0.191989	6.52105	0.00285449	0.00808229
EXOSC5	protein_coding	ENSG00000077348	-0.100529	3.97757	0.219264	0.328599
DYNC1I2	protein_coding	ENSG00000077380	-0.000464389	7.20242	0.998654	1
LRCH4	protein_coding	ENSG00000077454	-0.0933719	3.64413	0.281366	0.399321
FAM76B	protein_coding	ENSG00000077458	0.0173232	4.39523	0.802129	0.876231
SIRT6	protein_coding	ENSG00000077463	0.0641345	3.92597	0.431221	0.556189
POLD3	protein_coding	ENSG00000077514	-0.510047	5.0603	6.33602e-14	7.94874e-13
ACTN2	protein_coding	ENSG00000077522	0.522622	0.285806	0.00461819	0.0123626
CAPZB	protein_coding	ENSG00000077549	-0.0752708	6.82058	0.235993	0.34807
GPR137B	protein_coding	ENSG00000077585	0.253446	4.44569	0.0011608	0.00361849
NAALAD2	protein_coding	ENSG00000077616	-0.561339	2.45854	6.48789e-08	4.26744e-07
JADE1	protein_coding	ENSG00000077684	0.208261	6.10478	0.0016124	0.00484987
SLC25A43	protein_coding	ENSG00000077713	0.0424352	3.65551	0.611229	0.720958
UBE2A	protein_coding	ENSG00000077721	-0.000246643	5.35756	0.996379	1
FGFR1	protein_coding	ENSG00000077782	0.187728	6.70143	0.00317827	0.00889036
FBLN1	protein_coding	ENSG00000077942	-0.0416647	6.98954	0.524696	0.643721
ITGA8	protein_coding	ENSG00000077943	1.33815	-2.05731	0.00471814	0.0126021
CST7	protein_coding	ENSG00000077984	0.233582	1.04711	0.10566	0.181399
MAP2	protein_coding	ENSG00000078018	0.415422	3.82396	6.53759e-07	3.73331e-06
PIAS2	protein_coding	ENSG00000078043	-0.211493	4.71641	0.00414305	0.0112279
AMPH	protein_coding	ENSG00000078053	-0.947133	4.8006	1.99824e-41	1.13786e-39
ARAF	protein_coding	ENSG00000078061	-0.0839497	6.0093	0.196867	0.301649
MCCC1	protein_coding	ENSG00000078070	-0.297323	4.28135	8.28474e-05	0.000330329
LAMP3	protein_coding	ENSG00000078081	-0.0242069	2.15656	0.812138	0.883957
FAP	protein_coding	ENSG00000078098	0.188916	3.36687	0.0448887	0.0890712
NEBL	protein_coding	ENSG00000078114	0.107347	2.0474	0.361032	0.485472
ACER3	protein_coding	ENSG00000078124	-0.14528	4.95133	0.0359659	0.07376
UBE2K	protein_coding	ENSG00000078140	0.0832016	6.86662	0.212375	0.319897
PIK3C3	protein_coding	ENSG00000078142	0.16124	4.67383	0.029515	0.0624332
N4BP2	protein_coding	ENSG00000078177	0.136036	5.97754	0.0418617	0.0840618
TIGAR	protein_coding	ENSG00000078237	-0.263855	2.10401	0.0215057	0.0475063
TULP3	protein_coding	ENSG00000078246	-0.878891	5.75594	6.6698e-39	3.57012e-37
SYNJ2	protein_coding	ENSG00000078269	0.799597	6.6569	4.74647e-33	1.98832e-31
ADCY2	protein_coding	ENSG00000078295	0.71146	1.77504	5.23594e-09	3.98352e-08
PPP2R5C	protein_coding	ENSG00000078304	-0.121893	6.49915	0.067623	0.125151
PMS2P1	unprocessed_pseudogene	ENSG00000078319	-0.297386	3.69517	0.000462355	0.00156988
RBFOX1	protein_coding	ENSG00000078328	-0.325428	1.03874	0.0188996	0.0425771
GNB1	protein_coding	ENSG00000078369	0.116184	8.24884	0.0726959	0.132855
HOXA9	protein_coding	ENSG00000078399	-0.673633	3.22087	7.22716e-13	8.18048e-12
EDN1	protein_coding	ENSG00000078401	0.448245	4.33063	8.48761e-08	5.50097e-07
MLLT10	protein_coding	ENSG00000078403	-0.00982046	5.78202	0.894329	0.942943
ZCWPW1	protein_coding	ENSG00000078487	-0.0123381	2.03048	0.893049	0.942139
ADCYAP1R1	protein_coding	ENSG00000078549	0.0715714	1.62398	0.574946	0.689608
FGF20	protein_coding	ENSG00000078579	0.254733	-3.30155	0.760306	0.843047
NRDC	protein_coding	ENSG00000078618	-0.119272	7.71111	0.0663931	0.123274
VDAC3	protein_coding	ENSG00000078668	-0.263544	6.72236	4.09123e-05	0.000171892
PCM1	protein_coding	ENSG00000078674	-0.197162	6.94455	0.00624547	0.016148
TNRC6C	protein_coding	ENSG00000078687	-0.2482	3.77067	0.00221374	0.00642437
CBFA2T2	protein_coding	ENSG00000078699	-0.523092	4.66359	6.28965e-13	7.16645e-12
BRINP1	protein_coding	ENSG00000078725	-0.300583	2.6028	0.00163685	0.0049185
ITCH	protein_coding	ENSG00000078747	0.0508576	6.40268	0.443109	0.567662
PKD2L2	protein_coding	ENSG00000078795	-1.06104	-2.35827	0.0133102	0.0314193
TP53INP2	protein_coding	ENSG00000078804	-0.189395	4.93449	0.0120067	0.028708
SDF4	protein_coding	ENSG00000078808	0.130476	7.40461	0.0372151	0.0758977
MYH7B	protein_coding	ENSG00000078814	0.265618	-1.1216	0.430615	0.555526
TP73	protein_coding	ENSG00000078900	-0.61401	3.27821	1.60101e-13	1.93398e-12
TOLLIP	protein_coding	ENSG00000078902	-0.00189083	4.58462	0.965078	0.994985
UBE2D4	protein_coding	ENSG00000078967	-0.455411	4.42004	1.00417e-09	8.27769e-09
CLUL1	protein_coding	ENSG00000079101	-0.322307	-3.28075	0.572842	0.687839
RUNX1T1	protein_coding	ENSG00000079102	-1.13405	-1.9548	0.000292482	0.00103909
THOC1	protein_coding	ENSG00000079134	-0.00746759	5.59899	0.920403	0.961211
FKBP7	protein_coding	ENSG00000079150	0.161461	3.06943	0.100141	0.173469
OSBPL6	protein_coding	ENSG00000079156	-0.322343	4.32674	1.12114e-05	5.23147e-05
SLC1A3	protein_coding	ENSG00000079215	-0.256883	5.12931	0.00244706	0.0070421
XRCC5	protein_coding	ENSG00000079246	0.0396718	8.98861	0.554553	0.671873
SP140	protein_coding	ENSG00000079263	0.752235	3.27075	2.7103e-16	4.1848e-15
MKNK1	protein_coding	ENSG00000079277	1.50512	1.06946	1.40609e-21	3.22249e-20
TNS1	protein_coding	ENSG00000079308	0.479398	7.2135	4.22546e-12	4.47575e-11
REXO1	protein_coding	ENSG00000079313	0.0928102	5.32595	0.196844	0.301649
SAR1A	protein_coding	ENSG00000079332	0.324044	7.44538	2.90533e-06	1.49948e-05
CDC14A	protein_coding	ENSG00000079335	-0.167155	3.9562	0.0443485	0.0882463
RAPGEF3	protein_coding	ENSG00000079337	-0.28082	2.09905	0.0150499	0.0349202
CEACAM1	protein_coding	ENSG00000079385	-0.372528	0.167095	0.0244104	0.0529611
SENP1	protein_coding	ENSG00000079387	-0.143786	5.55505	0.0366123	0.0748816
CIC	protein_coding	ENSG00000079432	-0.318234	6.82774	1.93964e-06	1.02908e-05
LIPE	protein_coding	ENSG00000079435	0.250332	3.15368	0.013814	0.03244
FDFT1	protein_coding	ENSG00000079459	-0.157754	7.56984	0.0151912	0.0352028
PAFAH1B3	protein_coding	ENSG00000079462	-0.179062	5.10359	0.0100972	0.024714
OPHN1	protein_coding	ENSG00000079482	-0.534659	3.86804	6.36734e-11	5.98401e-10
KIF22	protein_coding	ENSG00000079616	0.16359	6.80189	0.0120163	0.0287253
CARMIL1	protein_coding	ENSG00000079691	0.392199	4.12463	3.62832e-07	2.14783e-06
PGM1	protein_coding	ENSG00000079739	-0.187546	5.59375	0.00362842	0.00998603
DDX1	protein_coding	ENSG00000079785	0.0758877	7.73228	0.247392	0.361762
DNM2	protein_coding	ENSG00000079805	-0.0199513	6.63561	0.75955	0.842643
EPB41L2	protein_coding	ENSG00000079819	0.0565154	8.66551	0.409184	0.534709
RIMS1	protein_coding	ENSG00000079841	0.5257	0.147933	0.00306812	0.00862836
MOXD1	protein_coding	ENSG00000079931	-0.0226638	5.16931	0.738654	0.826754
STX7	protein_coding	ENSG00000079950	-0.309696	5.20605	1.45644e-05	6.65301e-05
RABL2B	protein_coding	ENSG00000079974	-0.0273011	5.01842	0.696223	0.793167
KEAP1	protein_coding	ENSG00000079999	-0.0688371	5.77737	0.29997	0.420448
DDX43	protein_coding	ENSG00000080007	0.488148	4.29237	3.57911e-10	3.09107e-09
PTPRH	protein_coding	ENSG00000080031	-0.610917	2.31539	1.44374e-07	9.05114e-07
DCT	protein_coding	ENSG00000080166	2.3078	-1.45067	4.0154e-09	3.09897e-08
SLC35C2	protein_coding	ENSG00000080189	0.048671	6.05868	0.447274	0.57172
CRYBG3	protein_coding	ENSG00000080200	-0.0875324	6.11874	0.210974	0.318344
EPHA6	protein_coding	ENSG00000080224	-0.0620341	1.81088	0.636829	0.743075
RFX3	protein_coding	ENSG00000080298	-0.0472819	3.51003	0.571975	0.687037
RIF1	protein_coding	ENSG00000080345	0.385379	7.18106	4.7396e-08	3.1756e-07
RAB21	protein_coding	ENSG00000080371	0.35815	5.48661	1.32353e-07	8.35863e-07
SLC4A4	protein_coding	ENSG00000080493	-0.0900526	2.36163	0.362811	0.487397
SMARCA2	protein_coding	ENSG00000080503	-0.312875	5.72534	3.41932e-06	1.74346e-05
RDH8	protein_coding	ENSG00000080511	4.60259	-1.75879	1.40489e-20	3.01332e-19
SESN1	protein_coding	ENSG00000080546	-1.10278	3.8647	1.75619e-44	1.13105e-42
MID2	protein_coding	ENSG00000080561	-0.317178	1.81148	0.0130396	0.0308555
COL5A3	protein_coding	ENSG00000080573	0.616418	5.11264	1.86273e-14	2.4666e-13
SRCAP	protein_coding	ENSG00000080603	0.793961	3.09929	1.58947e-11	1.58993e-10
PUM3	protein_coding	ENSG00000080608	0.319203	6.11121	1.16002e-05	5.40139e-05
CHRNA3	protein_coding	ENSG00000080644	-0.303057	1.83952	0.00728941	0.0185426
KCNN2	protein_coding	ENSG00000080709	-0.603901	-0.0666943	0.00195391	0.00576128
CNOT4	protein_coding	ENSG00000080802	-0.2428	4.714	0.00273836	0.00778484
PSEN1	protein_coding	ENSG00000080815	0.176791	6.61884	0.0062298	0.0161126
CPOX	protein_coding	ENSG00000080819	-0.303878	5.97788	3.45105e-06	1.75815e-05
CLDND1	protein_coding	ENSG00000080822	0.327492	6.47966	8.39512e-07	4.71616e-06
MOK	protein_coding	ENSG00000080823	0.457497	4.5038	1.0446e-09	8.59334e-09
HSP90AA1	protein_coding	ENSG00000080824	0.268241	11.1396	0.000153318	0.000578743
RBL1	protein_coding	ENSG00000080839	0.119176	4.9673	0.0981916	0.170608
DLGAP4	protein_coding	ENSG00000080845	0.421397	6.99157	1.35005e-10	1.22297e-09
IGSF9B	protein_coding	ENSG00000080854	0.256536	2.88103	0.0184926	0.0417617
CROCCP3	transcribed_unprocessed_pseudogene	ENSG00000080947	-0.612673	2.00958	3.58642e-06	1.81942e-05
NDC80	protein_coding	ENSG00000080986	-0.408919	7.31605	1.90323e-08	1.34635e-07
AP4E1	protein_coding	ENSG00000081014	-0.0269992	4.49678	0.72332	0.815116
RSBN1	protein_coding	ENSG00000081019	0.0531953	4.67315	0.506604	0.627316
MAGI3	protein_coding	ENSG00000081026	-0.702074	5.00968	1.09045e-22	2.69392e-21
AFP	protein_coding	ENSG00000081051	-0.00147903	2.02304	0.97174	1
COL4A4	protein_coding	ENSG00000081052	-0.457807	4.20976	1.13235e-09	9.27088e-09
TCF7	protein_coding	ENSG00000081059	1.81767	-1.38578	2.89916e-09	2.27466e-08
OSTM1	protein_coding	ENSG00000081087	0.0834122	4.64163	0.246779	0.361002
CDH7	protein_coding	ENSG00000081138	0.330073	-1.73082	0.335782	0.458503
IMPG2	protein_coding	ENSG00000081148	-0.558772	-1.02942	0.0264632	0.056806
PCNP	protein_coding	ENSG00000081154	-0.0390452	7.39003	0.550097	0.667334
EXD2	protein_coding	ENSG00000081177	-0.554858	4.54969	3.47159e-13	4.05923e-12
ARG2	protein_coding	ENSG00000081181	-0.476058	4.67075	3.57402e-11	3.43937e-10
MEF2C	protein_coding	ENSG00000081189	0.341195	0.931514	0.0324195	0.0675568
PTPRC	protein_coding	ENSG00000081237	0.644267	-0.794647	0.0273341	0.0584254
UBA5	protein_coding	ENSG00000081307	0.0297177	5.71003	0.650416	0.754672
STK17B	protein_coding	ENSG00000081320	0.321151	4.94868	9.80324e-06	4.62005e-05
CDC14B	protein_coding	ENSG00000081377	0.152	4.61483	0.0351009	0.0722444
ZNF510	protein_coding	ENSG00000081386	-0.136274	4.39291	0.0715555	0.131099
LRP2	protein_coding	ENSG00000081479	-0.700739	-2.70165	0.152411	0.245412
JMJD4	protein_coding	ENSG00000081692	0.109685	3.78009	0.204369	0.3104
DUSP12	protein_coding	ENSG00000081721	0.143852	4.90089	0.0464579	0.0917088
AACS	protein_coding	ENSG00000081760	0.251006	5.7463	0.000128038	0.000491325
DELE1	protein_coding	ENSG00000081791	-0.0070537	5.64165	0.916171	0.957967
CADPS2	protein_coding	ENSG00000081803	-0.464369	2.37036	3.53259e-06	1.79438e-05
PCDHB4	protein_coding	ENSG00000081818	-0.567544	-0.72239	0.00753569	0.0191005
PCDHA6	protein_coding	ENSG00000081842	-0.185806	3.19823	0.0403685	0.0814505
PCDHGA2	protein_coding	ENSG00000081853	-0.358409	-0.160441	0.103954	0.178954
HSPB11	protein_coding	ENSG00000081870	-0.22922	5.30448	0.00105863	0.00332975
PHLPP1	protein_coding	ENSG00000081913	-0.806022	3.80728	4.07841e-22	9.67849e-21
ATP8B1	protein_coding	ENSG00000081923	-1.35419	3.23265	1.48967e-44	9.61973e-43
SMARCD3	protein_coding	ENSG00000082014	-0.0645798	3.2403	0.463538	0.587181
WDR70	protein_coding	ENSG00000082068	-0.10041	5.21907	0.167389	0.26484
FYB1	protein_coding	ENSG00000082074	1.76915	-3.9091	0.0258453	0.055684
MPP4	protein_coding	ENSG00000082126	0.378751	2.5517	0.000200955	0.000740462
STRADB	protein_coding	ENSG00000082146	-0.36033	4.3778	5.78566e-07	3.32441e-06
BZW1	protein_coding	ENSG00000082153	0.482838	8.43655	1.16946e-12	1.2975e-11
C1QTNF3	protein_coding	ENSG00000082196	-0.450959	-0.754618	0.0447457	0.0888386
ME2	protein_coding	ENSG00000082212	-0.172189	6.48167	0.0113968	0.0274598
C5orf22	protein_coding	ENSG00000082213	-0.713791	5.26565	1.39046e-23	3.61684e-22
CCNT2	protein_coding	ENSG00000082258	0.313275	6.12116	1.32698e-06	7.22653e-06
FAM135A	protein_coding	ENSG00000082269	-0.241741	4.54098	0.00078807	0.00254385
COL19A1	protein_coding	ENSG00000082293	1.70838	0.356173	2.38466e-18	4.35476e-17
EPB41L3	protein_coding	ENSG00000082397	-0.223432	7.69897	0.00122589	0.00380124
COBLL1	protein_coding	ENSG00000082438	-0.6143	4.62846	1.42102e-16	2.2563e-15
DLG3	protein_coding	ENSG00000082458	0.65968	4.0096	1.42308e-16	2.25808e-15
KCNK2	protein_coding	ENSG00000082482	0.160653	-0.836585	0.479793	0.602229
SERTAD4	protein_coding	ENSG00000082497	-0.67274	5.93593	7.8602e-24	2.08053e-22
TRAF5	protein_coding	ENSG00000082512	-0.287199	4.6501	4.18434e-05	0.000175528
MRPL22	protein_coding	ENSG00000082515	-0.125388	5.10357	0.0853294	0.151864
GEMIN5	protein_coding	ENSG00000082516	0.508019	6.68676	1.96511e-13	2.35023e-12
OPRK1	protein_coding	ENSG00000082556	-1.58472	-1.27479	1.20072e-08	8.69829e-08
NFE2L1	protein_coding	ENSG00000082641	0.180739	8.93792	0.00513062	0.0135744
SEMA5B	protein_coding	ENSG00000082684	0.628142	-2.87697	0.318731	0.440387
GSK3B	protein_coding	ENSG00000082701	-0.313006	6.88114	2.19675e-06	1.1522e-05
ITGB5	protein_coding	ENSG00000082781	0.32669	8.53885	2.5308e-07	1.5278e-06
ERC1	protein_coding	ENSG00000082805	-0.155767	6.98596	0.0232338	0.0507005
XPO1	protein_coding	ENSG00000082898	0.00167479	8.88778	0.981266	1
RNF13	protein_coding	ENSG00000082996	-0.344344	4.51063	3.24397e-06	1.65897e-05
TRPM3	protein_coding	ENSG00000083067	0.866647	-1.75439	0.0119221	0.0285369
PALB2	protein_coding	ENSG00000083093	0.312654	4.86215	1.43342e-05	6.55905e-05
DOP1A	protein_coding	ENSG00000083097	-0.0952375	2.86957	0.314413	0.435882
LYRM2	protein_coding	ENSG00000083099	-0.150191	4.9273	0.037991	0.0773009
BCKDHB	protein_coding	ENSG00000083123	-0.32457	2.86908	0.000438957	0.00149931
KAT6A	protein_coding	ENSG00000083168	0.230012	6.44516	0.0016072	0.00483665
TUT7	protein_coding	ENSG00000083223	0.0235867	5.62425	0.740007	0.827663
ULK2	protein_coding	ENSG00000083290	-0.635757	2.05307	2.57231e-09	2.03212e-08
TNPO1	protein_coding	ENSG00000083312	-0.108813	8.28466	0.105847	0.181618
PLOD1	protein_coding	ENSG00000083444	0.0334704	8.25082	0.598916	0.70998
P2RX5	protein_coding	ENSG00000083454	0.49973	0.865172	0.00254658	0.00730079
ITGAE	protein_coding	ENSG00000083457	-0.0426168	3.46865	0.659403	0.762069
DIS3	protein_coding	ENSG00000083520	0.308148	6.0601	9.04899e-06	4.28723e-05
PIBF1	protein_coding	ENSG00000083535	-0.0102383	3.84804	0.937097	0.973302
TDRD3	protein_coding	ENSG00000083544	-0.135854	3.28496	0.162093	0.258155
NUFIP1	protein_coding	ENSG00000083635	0.230902	3.8973	0.00713028	0.0181743
PDS5B	protein_coding	ENSG00000083642	-0.245183	6.13764	0.000569109	0.00189496
OXCT1	protein_coding	ENSG00000083720	-0.0708478	6.623	0.292438	0.411807
RRAGB	protein_coding	ENSG00000083750	-0.355579	3.17244	0.000272007	0.000974249
CYLD	protein_coding	ENSG00000083799	0.377439	5.35703	1.27213e-07	8.0573e-07
SLC27A5	protein_coding	ENSG00000083807	-0.414341	1.44527	0.00405678	0.0110239
ZNF324	protein_coding	ENSG00000083812	0.444788	2.73767	5.09538e-06	2.5238e-05
ZNF671	protein_coding	ENSG00000083814	-0.607765	2.17199	1.59183e-07	9.89993e-07
ZNF416	protein_coding	ENSG00000083817	0.123672	1.94346	0.324915	0.446881
ZNF586	protein_coding	ENSG00000083828	-0.714337	2.41847	4.41672e-11	4.19336e-10
ZNF446	protein_coding	ENSG00000083838	-0.172393	2.03812	0.113858	0.19298
ZNF264	protein_coding	ENSG00000083844	-0.207952	4.25818	0.00584572	0.0152272
RPS5	protein_coding	ENSG00000083845	-0.140668	8.04826	0.0359914	0.0738059
FAT1	protein_coding	ENSG00000083857	-0.0819726	8.36724	0.272121	0.389272
YTHDC1	protein_coding	ENSG00000083896	-0.0555437	7.07758	0.395479	0.521116
CHMP2B	protein_coding	ENSG00000083937	0.128797	5.74214	0.0610639	0.115
SMAP2	protein_coding	ENSG00000084070	0.0915389	5.34726	0.1677	0.265225
PPIE	protein_coding	ENSG00000084072	-0.0336094	5.33501	0.624007	0.732371
ZMPSTE24	protein_coding	ENSG00000084073	0.401825	7.08521	1.08125e-09	8.87968e-09
STARD7	protein_coding	ENSG00000084090	-0.15347	7.35282	0.0166944	0.0382313
NOA1	protein_coding	ENSG00000084092	-0.316209	5.59293	1.30684e-06	7.12329e-06
REST	protein_coding	ENSG00000084093	0.429657	6.86264	3.62291e-10	3.12554e-09
HAL	protein_coding	ENSG00000084110	-0.450614	-2.0471	0.164714	0.261447
SSH1	protein_coding	ENSG00000084112	0.112644	6.25475	0.0955677	0.166662
GSTP1	protein_coding	ENSG00000084207	-0.0212473	8.1691	0.752104	0.837128
APLP2	protein_coding	ENSG00000084234	0.162539	8.82422	0.0118329	0.0283534
FAM234B	protein_coding	ENSG00000084444	-0.0101246	3.53746	0.882733	0.935164
SLCO1A2	protein_coding	ENSG00000084453	-0.951946	0.0931862	1.54992e-07	9.65922e-07
WBP11	protein_coding	ENSG00000084463	-0.0527212	7.80994	0.422244	0.547482
EIF3I	protein_coding	ENSG00000084623	0.0333851	7.82808	0.605078	0.715706
NKAIN1	protein_coding	ENSG00000084628	0.383624	-1.91658	0.279793	0.397631
COL16A1	protein_coding	ENSG00000084636	0.101861	7.07988	0.123306	0.206213
TXLNA	protein_coding	ENSG00000084652	0.130363	7.48998	0.0385842	0.0783095
APOB	protein_coding	ENSG00000084674	0.564131	-3.20556	0.313166	0.434468
NCOA1	protein_coding	ENSG00000084676	-0.491021	5.6847	1.48967e-12	1.63545e-11
AGBL5	protein_coding	ENSG00000084693	-0.280577	6.03969	3.09545e-05	0.0001335
EFR3B	protein_coding	ENSG00000084710	-0.223257	5.22858	0.00165285	0.00496165
KIF3C	protein_coding	ENSG00000084731	-0.333379	6.04354	9.25135e-07	5.15947e-06
RAB10	protein_coding	ENSG00000084733	0.0989346	6.98623	0.131093	0.216736
GCKR	protein_coding	ENSG00000084734	2.95307	-3.95469	0.000558846	0.00186439
HADHA	protein_coding	ENSG00000084754	-0.0368508	8.03681	0.567582	0.683124
MAPRE3	protein_coding	ENSG00000084764	-0.0256572	4.19145	0.736797	0.825414
CAD	protein_coding	ENSG00000084774	-0.149013	7.45266	0.03182	0.0665089
CD59	protein_coding	ENSG00000085063	0.711402	7.08858	9.36949e-27	2.89337e-25
CD82	protein_coding	ENSG00000085117	0.926941	5.12375	4.26381e-36	2.05816e-34
BCORL1	protein_coding	ENSG00000085185	-0.386892	4.32052	2.3529e-07	1.42721e-06
ATRX	protein_coding	ENSG00000085224	-0.254686	7.54128	0.000201468	0.000742124
AK6	protein_coding	ENSG00000085231	0.0668469	3.50984	0.516608	0.636401
MYNN	protein_coding	ENSG00000085274	0.34413	4.59692	4.76304e-06	2.37089e-05
MECOM	protein_coding	ENSG00000085276	0.132963	4.57788	0.0850402	0.151417
SCAMP1	protein_coding	ENSG00000085365	-0.0311395	5.60367	0.644195	0.74942
PREP	protein_coding	ENSG00000085377	0.0893579	5.60822	0.183531	0.285649
HACE1	protein_coding	ENSG00000085382	-0.306533	3.22832	0.000607938	0.00201063
SEH1L	protein_coding	ENSG00000085415	0.511597	7.3531	5.83615e-15	8.04207e-14
WDR47	protein_coding	ENSG00000085433	0.185845	4.35255	0.0133583	0.0315046
WDFY1	protein_coding	ENSG00000085449	0.0788843	6.73502	0.224715	0.334986
OVGP1	protein_coding	ENSG00000085465	0.904638	0.0817644	8.64865e-05	0.000343422
SLC25A24	protein_coding	ENSG00000085491	0.0851877	6.11377	0.219402	0.328725
MAP3K4	protein_coding	ENSG00000085511	0.22619	6.22198	0.000912138	0.00290887
PILRA	protein_coding	ENSG00000085514	-0.282374	0.359962	0.115127	0.194711
IGSF9	protein_coding	ENSG00000085552	-0.872497	3.58117	7.47018e-22	1.73514e-20
ABCB1	protein_coding	ENSG00000085563	0.458814	5.22917	2.10828e-11	2.0838e-10
ZNF213	protein_coding	ENSG00000085644	0.457808	4.02276	2.95943e-08	2.03785e-07
AKR1B1	protein_coding	ENSG00000085662	-0.115127	6.37342	0.0751052	0.13643
CPNE3	protein_coding	ENSG00000085719	-0.100368	6.79419	0.12001	0.201582
RRN3	protein_coding	ENSG00000085721	0.152604	5.84901	0.0245618	0.0532455
CTTN	protein_coding	ENSG00000085733	0.262006	8.1102	5.75246e-05	0.000235485
WNT11	protein_coding	ENSG00000085741	-1.03725	0.36228	2.24541e-08	1.57545e-07
MTIF2	protein_coding	ENSG00000085760	-0.141329	6.33702	0.0455185	0.0901352
DDHD2	protein_coding	ENSG00000085788	-0.0739232	5.39679	0.286595	0.405356
TTC39A	protein_coding	ENSG00000085831	-0.388517	1.70729	0.000605126	0.00200215
EPS15	protein_coding	ENSG00000085832	0.0170662	5.80916	0.800052	0.874477
ORC1	protein_coding	ENSG00000085840	-0.456449	5.25556	2.31142e-11	2.26783e-10
MGST2	protein_coding	ENSG00000085871	-0.167424	3.69621	0.0382774	0.0777982
CHERP	protein_coding	ENSG00000085872	0.128171	6.05435	0.0546605	0.104885
ATG16L1	protein_coding	ENSG00000085978	-0.0117295	5.11089	0.874595	0.929549
USP40	protein_coding	ENSG00000085982	0.0781323	5.5954	0.248655	0.363186
POMGNT1	protein_coding	ENSG00000085998	0.109841	6.73073	0.0813018	0.145806
RAD54L	protein_coding	ENSG00000085999	-0.166627	5.13648	0.0130187	0.0308127
MAST2	protein_coding	ENSG00000086015	-0.434531	7.09935	1.10378e-11	1.12228e-10
DNAJA1	protein_coding	ENSG00000086061	0.334411	9.42848	8.96761e-07	5.00702e-06
B4GALT1	protein_coding	ENSG00000086062	0.501877	7.28266	2.4385e-15	3.4714e-14
CHMP5	protein_coding	ENSG00000086065	0.126236	6.50949	0.0685698	0.126601
NFX1	protein_coding	ENSG00000086102	0.195408	6.29478	0.00215212	0.00626593
AQP6	protein_coding	ENSG00000086159	2.29464	-3.34774	0.000171714	0.000642148
DIMT1	protein_coding	ENSG00000086189	0.31252	5.6493	2.68531e-05	0.000116858
IPO11	protein_coding	ENSG00000086200	0.127878	5.44654	0.0601628	0.113569
FOLH1	protein_coding	ENSG00000086205	-0.353922	0.772133	0.0195371	0.0438166
EIF2AK1	protein_coding	ENSG00000086232	-0.0902414	8.25122	0.164023	0.260583
EPDR1	protein_coding	ENSG00000086289	-0.420618	5.6632	8.59995e-11	7.97639e-10
SNX10	protein_coding	ENSG00000086300	-0.129874	4.04762	0.0917855	0.161234
SEPHS1	protein_coding	ENSG00000086475	-0.19246	6.78168	0.00363675	0.0100055
MRPL28	protein_coding	ENSG00000086504	0.0129633	6.22171	0.842495	0.907161
ITPKC	protein_coding	ENSG00000086544	0.60199	4.6424	7.52592e-17	1.21826e-15
FAT2	protein_coding	ENSG00000086570	0.666522	-1.07042	0.00751749	0.0190584
RBM22	protein_coding	ENSG00000086589	-0.235797	6.31066	0.000265532	0.000953184
TMED2	protein_coding	ENSG00000086598	0.0907287	8.09156	0.161757	0.257739
ERO1B	protein_coding	ENSG00000086619	0.206557	3.24418	0.0210151	0.0465633
ZFAND6	protein_coding	ENSG00000086666	-0.0765772	5.6054	0.279826	0.39765
HSD17B2	protein_coding	ENSG00000086696	2.6016	-1.60551	1.33376e-10	1.20912e-09
TXLNG	protein_coding	ENSG00000086712	0.29334	5.37782	7.24976e-05	0.000292211
PPEF1	protein_coding	ENSG00000086717	1.23725	-3.58518	0.0682877	0.126148
LAT2	protein_coding	ENSG00000086730	-0.0799359	5.24748	0.248902	0.36344
HUWE1	protein_coding	ENSG00000086758	0.0476691	8.93957	0.556822	0.674057
ZW10	protein_coding	ENSG00000086827	-0.162695	6.07268	0.0131252	0.0310312
ALG9	protein_coding	ENSG00000086848	0.0484585	3.89959	0.538901	0.656975
MYBPC2	protein_coding	ENSG00000086967	1.47104	-2.00944	7.43715e-05	0.000299113
NOX4	protein_coding	ENSG00000086991	-0.312929	2.36867	0.00262047	0.00748865
ACOX3	protein_coding	ENSG00000087008	-0.0215827	2.71077	0.863083	0.922033
MTMR2	protein_coding	ENSG00000087053	0.161783	6.61547	0.0144851	0.0337757
PPP1R15A	protein_coding	ENSG00000087074	0.137492	5.96696	0.173435	0.27267
HSD17B14	protein_coding	ENSG00000087076	-0.197963	2.5768	0.0458252	0.0906381
TRIP6	protein_coding	ENSG00000087077	-0.409743	6.38469	1.91093e-09	1.52868e-08
ACHE	protein_coding	ENSG00000087085	0.372676	3.0302	8.30522e-05	0.000330931
FTL	protein_coding	ENSG00000087086	-0.122241	9.63298	0.0643822	0.120159
SRRT	protein_coding	ENSG00000087087	-0.08542	8.03469	0.1807	0.281954
BAX	protein_coding	ENSG00000087088	-0.380721	6.79706	7.63858e-09	5.70336e-08
NLK	protein_coding	ENSG00000087095	0.067281	5.80614	0.300053	0.420514
PIGS	protein_coding	ENSG00000087111	-0.204208	5.89993	0.00166299	0.00499021
ADAMTS2	protein_coding	ENSG00000087116	0.00454333	3.41556	0.968432	0.997504
ATXN7L3	protein_coding	ENSG00000087152	0.254883	6.794	0.000104522	0.000408441
PGS1	protein_coding	ENSG00000087157	-0.513056	4.9386	2.67e-13	3.14947e-12
PSMC5	protein_coding	ENSG00000087191	-0.0128051	8.15202	0.848159	0.911084
UIMC1	protein_coding	ENSG00000087206	-0.126686	5.23615	0.0769839	0.139221
MMP2	protein_coding	ENSG00000087245	-0.0989597	8.21869	0.116986	0.197299
LPCAT2	protein_coding	ENSG00000087253	-0.244468	-0.761103	0.285442	0.404104
GNAO1	protein_coding	ENSG00000087258	-0.830289	3.83507	3.41238e-24	9.23528e-23
OGFOD1	protein_coding	ENSG00000087263	0.241113	6.23848	0.000226183	0.000824967
SH3BP2	protein_coding	ENSG00000087266	-0.0943195	4.58609	0.209333	0.316265
NOP14	protein_coding	ENSG00000087269	0.316127	6.14085	2.44517e-06	1.27537e-05
ADD1	protein_coding	ENSG00000087274	-0.0678734	7.02758	0.289422	0.40861
L2HGDH	protein_coding	ENSG00000087299	-0.28849	5.39483	2.28204e-05	0.000100507
TXNDC16	protein_coding	ENSG00000087301	-0.0882249	3.37995	0.309132	0.430185
RTRAF	protein_coding	ENSG00000087302	-0.015475	7.39267	0.835802	0.902172
NID2	protein_coding	ENSG00000087303	0.95665	1.15747	3.52671e-10	3.0491e-09
GMCL1	protein_coding	ENSG00000087338	-0.321152	5.80685	1.60608e-06	8.62173e-06
SF3B2	protein_coding	ENSG00000087365	0.0212632	8.33695	0.740827	0.828165
KLHL42	protein_coding	ENSG00000087448	0.336493	6.04752	4.61572e-07	2.69459e-06
GNAS	protein_coding	ENSG00000087460	-0.0753735	9.64321	0.252657	0.367452
DNM1L	protein_coding	ENSG00000087470	-0.0876976	7.25951	0.180765	0.282026
PTHLH	protein_coding	ENSG00000087494	1.28749	4.02406	5.87826e-38	3.02542e-36
PHACTR3	protein_coding	ENSG00000087495	-0.489809	0.907626	0.000884689	0.00282807
ERGIC2	protein_coding	ENSG00000087502	0.0973211	6.73018	0.146493	0.23755
TFAP2C	protein_coding	ENSG00000087510	2.22485	-3.41873	0.0197702	0.0442529
AURKA	protein_coding	ENSG00000087586	0.0197633	7.66115	0.761421	0.843894
CASS4	protein_coding	ENSG00000087589	1.76458	1.39486	5.83078e-27	1.81925e-25
PIR	protein_coding	ENSG00000087842	-0.387016	2.87041	6.09606e-05	0.000248579
AAMDC	protein_coding	ENSG00000087884	-0.149503	2.56736	0.151966	0.24487
RFX2	protein_coding	ENSG00000087903	-0.536681	3.46056	4.84359e-10	4.13568e-09
METTL2A	protein_coding	ENSG00000087995	-0.0196268	5.5226	0.779248	0.857575
SULT2B1	protein_coding	ENSG00000088002	0.34785	-3.1537	0.5262	0.645049
ALG6	protein_coding	ENSG00000088035	-0.221837	3.66385	0.0086093	0.0214938
CNOT3	protein_coding	ENSG00000088038	-0.0398581	6.41299	0.544856	0.662557
GP6	protein_coding	ENSG00000088053	-0.920502	2.36026	3.39197e-19	6.63168e-18
PTPN4	protein_coding	ENSG00000088179	-0.355438	4.74101	8.92544e-07	4.98578e-06
DDX18	protein_coding	ENSG00000088205	0.31207	7.79828	1.26903e-05	5.87489e-05
KHSRP	protein_coding	ENSG00000088247	0.00552715	8.0613	0.929877	0.968652
GNA11	protein_coding	ENSG00000088256	-0.195987	6.51413	0.00233688	0.00675244
ASAP3	protein_coding	ENSG00000088280	-0.513421	4.21089	1.39972e-11	1.40773e-10
EDEM2	protein_coding	ENSG00000088298	-0.0352333	5.25973	0.610419	0.720373
DNMT3B	protein_coding	ENSG00000088305	-0.844258	4.99977	5.42347e-34	2.33277e-32
REM1	protein_coding	ENSG00000088320	1.83821	-3.55746	0.0172359	0.0392995
TPX2	protein_coding	ENSG00000088325	-0.0819564	9.01512	0.232882	0.344497
FER1L4	transcribed_unitary_pseudogene	ENSG00000088340	0.850424	1.98739	1.11407e-10	1.01955e-09
PDRG1	protein_coding	ENSG00000088356	-0.125932	4.9983	0.0837373	0.149528
EPB41L1	protein_coding	ENSG00000088367	-0.112659	6.42442	0.0795386	0.143088
DOCK9	protein_coding	ENSG00000088387	0.0848958	4.40303	0.245209	0.359141
ANKRD10	protein_coding	ENSG00000088448	-0.228916	5.75062	0.000885448	0.00283012
TGDS	protein_coding	ENSG00000088451	0.251892	4.41677	0.00162851	0.00489589
DOCK3	protein_coding	ENSG00000088538	-0.906549	2.90467	2.93061e-22	7.01685e-21
C3orf18	protein_coding	ENSG00000088543	-0.538463	3.81021	1.2173e-10	1.10687e-09
COQ9	protein_coding	ENSG00000088682	-0.109681	5.13414	0.110972	0.188807
TMEM40	protein_coding	ENSG00000088726	-0.211326	1.29919	0.0895751	0.158031
KIF9	protein_coding	ENSG00000088727	0.292244	2.72629	0.00431246	0.0116242
ARHGAP28	protein_coding	ENSG00000088756	-0.921938	3.41617	9.05598e-29	3.08531e-27
CRLS1	protein_coding	ENSG00000088766	-0.0803988	4.67485	0.272065	0.389262
PPP1R13B	protein_coding	ENSG00000088808	-0.183009	4.32399	0.0170309	0.0388875
ATRN	protein_coding	ENSG00000088812	-0.00478049	6.56626	0.938178	0.974257
SMOX	protein_coding	ENSG00000088826	0.621582	4.68078	8.91815e-16	1.31867e-14
SIGLEC1	protein_coding	ENSG00000088827	0.5376	-2.86455	0.368882	0.49401
FKBP1A	protein_coding	ENSG00000088832	0.110316	6.85708	0.0967617	0.168488
NSFL1C	protein_coding	ENSG00000088833	0.0185543	6.9938	0.769487	0.850446
SLC4A11	protein_coding	ENSG00000088836	-0.21443	4.33895	0.00416922	0.0112867
C20orf194	protein_coding	ENSG00000088854	0.0886932	4.24228	0.237445	0.349913
ZNF343	protein_coding	ENSG00000088876	-0.179495	3.94359	0.0367825	0.0751468
EBF4	protein_coding	ENSG00000088881	-0.254362	1.16481	0.0626348	0.117426
MAVS	protein_coding	ENSG00000088888	-0.489262	6.44455	3.30933e-14	4.26038e-13
LZTS3	protein_coding	ENSG00000088899	-0.93683	5.35811	2.96051e-45	1.95906e-43
XRN2	protein_coding	ENSG00000088930	0.0129762	7.60399	0.840615	0.905905
KIZ	protein_coding	ENSG00000088970	-0.597233	3.27335	1.67519e-11	1.6722e-10
DYNLL1	protein_coding	ENSG00000088986	0.149989	7.69607	0.0256212	0.0552743
TESC	protein_coding	ENSG00000088992	0.266845	-0.546689	0.285083	0.40362
SNX5	protein_coding	ENSG00000089006	0.0249714	6.58958	0.692453	0.789843
RPL6	protein_coding	ENSG00000089009	0.0280865	9.48705	0.67634	0.776095
MAPKAPK5	protein_coding	ENSG00000089022	0.297805	5.34099	1.32791e-05	6.12042e-05
P2RX7	protein_coding	ENSG00000089041	-0.69684	0.274393	0.000121093	0.000467057
ESF1	protein_coding	ENSG00000089048	0.470852	5.95176	3.35778e-09	2.61575e-08
RBBP9	protein_coding	ENSG00000089050	-0.40052	4.7151	1.95798e-08	1.38264e-07
ANAPC5	protein_coding	ENSG00000089053	-0.0304116	6.23965	0.642066	0.747701
SLC23A2	protein_coding	ENSG00000089057	-0.0579357	5.42826	0.382668	0.508353
SLC8B1	protein_coding	ENSG00000089060	-0.0569829	4.67754	0.428084	0.553149
TMEM230	protein_coding	ENSG00000089063	-0.174766	6.16539	0.00870897	0.0217044
DZANK1	protein_coding	ENSG00000089091	0.189201	1.71196	0.163525	0.25992
KDM2B	protein_coding	ENSG00000089094	-0.252791	5.34473	0.000186306	0.00069167
CFAP61	protein_coding	ENSG00000089101	-0.0285076	-3.07081	1	1
LHX5	protein_coding	ENSG00000089116	0.714141	1.23092	3.68825e-07	2.18117e-06
TASP1	protein_coding	ENSG00000089123	-0.230619	2.33317	0.0445784	0.0886015
OAS1	protein_coding	ENSG00000089127	-0.00461621	0.291937	1	1
GCN1	protein_coding	ENSG00000089154	0.103019	7.81674	0.134017	0.220783
RPLP0	protein_coding	ENSG00000089157	0.013223	10.6742	0.846897	0.910313
PXN	protein_coding	ENSG00000089159	0.484495	8.07912	3.87667e-14	4.95897e-13
SIRT4	protein_coding	ENSG00000089163	-0.694692	-0.654725	0.00202515	0.00594947
RPH3A	protein_coding	ENSG00000089169	0.391849	-2.70024	0.738057	0.826364
KIF16B	protein_coding	ENSG00000089177	0.118781	4.36606	0.116459	0.196591
TRMT6	protein_coding	ENSG00000089195	0.295991	5.97157	0.00071936	0.0023431
CHGB	protein_coding	ENSG00000089199	0.567063	2.58493	3.08134e-08	2.11574e-07
PEBP1	protein_coding	ENSG00000089220	0.0127648	7.34885	0.844744	0.908892
TBX5	protein_coding	ENSG00000089225	-1.20589	-1.81445	2.97626e-05	0.000128752
BRAP	protein_coding	ENSG00000089234	0.087163	5.00937	0.219647	0.329041
ERP29	protein_coding	ENSG00000089248	0.000149777	7.9667	0.997691	1
NOS1	protein_coding	ENSG00000089250	0.418126	2.85884	8.55151e-06	4.07478e-05
FUS	protein_coding	ENSG00000089280	0.0425617	9.24205	0.524686	0.643721
IGBP1	protein_coding	ENSG00000089289	-0.0407358	5.34801	0.559779	0.6763
FXYD5	protein_coding	ENSG00000089327	0.083064	7.01614	0.197011	0.301832
ZNF302	protein_coding	ENSG00000089335	-0.221595	5.23149	0.00175532	0.00523919
GRAMD1A	protein_coding	ENSG00000089351	0.157956	5.63945	0.0253628	0.0547757
HEPH	protein_coding	ENSG00000089472	0.209051	0.732807	0.212603	0.32018
CDIP1	protein_coding	ENSG00000089486	-0.295155	5.17926	2.79172e-05	0.000121226
CMTM1	protein_coding	ENSG00000089505	0.113899	3.09256	0.219078	0.328351
KCNH4	protein_coding	ENSG00000089558	2.03736	-1.58657	3.2217e-10	2.80554e-09
GANAB	protein_coding	ENSG00000089597	0.0760117	9.18958	0.236317	0.348464
GMIP	protein_coding	ENSG00000089639	-0.338264	2.55924	0.000889638	0.00284238
RBM41	protein_coding	ENSG00000089682	-0.197628	3.84574	0.0176662	0.0401326
BIRC5	protein_coding	ENSG00000089685	-0.0511104	8.03712	0.423603	0.54892
LAG3	protein_coding	ENSG00000089692	0.545801	1.62796	0.00132179	0.0040625
MLF2	protein_coding	ENSG00000089693	0.0963648	8.3077	0.133289	0.219779
OTUB2	protein_coding	ENSG00000089723	0.494269	3.34684	3.33755e-07	1.98596e-06
DDX24	protein_coding	ENSG00000089737	0.309375	7.28218	1.03129e-05	4.83991e-05
ZBTB25	protein_coding	ENSG00000089775	-0.313768	4.33622	2.00607e-05	8.93162e-05
NECAP1	protein_coding	ENSG00000089818	-0.149467	5.18101	0.0494638	0.0965193
ARHGAP4	protein_coding	ENSG00000089820	0.247773	-0.612693	0.32767	0.449899
ANKRD24	protein_coding	ENSG00000089847	-0.379321	1.14942	0.00587494	0.0152901
DHX32	protein_coding	ENSG00000089876	-0.162082	4.1026	0.036713	0.0750517
RCOR1	protein_coding	ENSG00000089902	0.709315	5.98186	4.04904e-26	1.20258e-24
GPATCH2L	protein_coding	ENSG00000089916	0.0761655	5.70046	0.259452	0.375318
LTBP4	protein_coding	ENSG00000090006	-0.175315	7.51435	0.0104607	0.0254796
BLVRB	protein_coding	ENSG00000090013	-0.257495	5.60288	0.000120677	0.000465749
SLC9A1	protein_coding	ENSG00000090020	-0.213627	5.56348	0.00182602	0.00541933
SPTLC1	protein_coding	ENSG00000090054	0.247781	6.78155	0.000196158	0.000724449
PAPOLA	protein_coding	ENSG00000090060	0.00573602	7.53182	0.92815	0.967269
CCNK	protein_coding	ENSG00000090061	-0.168038	5.75894	0.0165746	0.0379931
PCBP4	protein_coding	ENSG00000090097	-0.220292	6.41809	0.000566948	0.00188881
YPEL3	protein_coding	ENSG00000090238	-0.444537	2.79192	4.35201e-06	2.18162e-05
MRPS33	protein_coding	ENSG00000090263	-0.115989	3.58415	0.171781	0.270507
NDUFB2	protein_coding	ENSG00000090266	-0.190461	4.28451	0.00877283	0.0218568
NUDC	protein_coding	ENSG00000090273	0.171993	8.28368	0.00840069	0.0210406
MAEA	protein_coding	ENSG00000090316	0.0853773	5.90446	0.187053	0.289661
ICAM1	protein_coding	ENSG00000090339	0.951937	-0.845322	0.000407399	0.0014026
STRN4	protein_coding	ENSG00000090372	-0.0833157	6.79906	0.214883	0.323009
IRAK3	protein_coding	ENSG00000090376	0.864432	-3.74352	0.397368	0.523108
MUL1	protein_coding	ENSG00000090432	0.474274	4.8475	9.41613e-11	8.71326e-10
TFAP4	protein_coding	ENSG00000090447	0.590544	4.10265	3.96674e-14	5.07149e-13
PDCD7	protein_coding	ENSG00000090470	-0.0323291	5.83089	0.624172	0.732387
SPG21	protein_coding	ENSG00000090487	-0.108222	6.22703	0.0915521	0.160859
FETUB	protein_coding	ENSG00000090512	-2.07065	-3.0943	4.55894e-06	2.27777e-05
DNAJB11	protein_coding	ENSG00000090520	0.240781	6.60107	0.000192578	0.000712539
P3H2	protein_coding	ENSG00000090530	0.385117	5.09225	2.49727e-08	1.73748e-07
THPO	protein_coding	ENSG00000090534	0.290787	-0.255658	0.10701	0.183208
CHRD	protein_coding	ENSG00000090539	-0.192348	2.98638	0.0336679	0.0697478
FLT3LG	protein_coding	ENSG00000090554	0.578064	-1.73694	0.439702	0.564302
RAB11FIP3	protein_coding	ENSG00000090565	-0.169036	5.48215	0.011247	0.0271449
GNPTG	protein_coding	ENSG00000090581	-0.0487573	4.84856	0.512828	0.632877
ZNF268	protein_coding	ENSG00000090612	0.285894	4.25946	0.000671264	0.00220013
GOLGA3	protein_coding	ENSG00000090615	-0.056945	6.5971	0.365641	0.490297
PABPC4	protein_coding	ENSG00000090621	0.174726	8.20001	0.00568009	0.014847
CD209	protein_coding	ENSG00000090659	1.57009	-3.69191	0.0350442	0.0721585
CERS4	protein_coding	ENSG00000090661	-0.133198	2.99665	0.151278	0.24398
MCOLN1	protein_coding	ENSG00000090674	-0.215089	3.66231	0.0101201	0.0247594
USP48	protein_coding	ENSG00000090686	-0.268594	5.8772	6.20851e-05	0.000252865
EFNB1	protein_coding	ENSG00000090776	-0.190475	5.54623	0.00357607	0.00986224
PDPR	protein_coding	ENSG00000090857	0.289899	7.549	4.94832e-06	2.455e-05
AARS	protein_coding	ENSG00000090861	-0.463935	7.37135	8.8938e-13	1.00012e-11
GLG1	protein_coding	ENSG00000090863	0.0166087	7.96683	0.802667	0.876544
KIF4A	protein_coding	ENSG00000090889	-0.0925485	7.23607	0.176358	0.276433
TNRC6A	protein_coding	ENSG00000090905	0.300303	7.08124	2.96989e-06	1.5305e-05
PLEKHG2	protein_coding	ENSG00000090924	0.140328	5.95794	0.0293181	0.0620767
DLL3	protein_coding	ENSG00000090932	-0.270564	1.26923	0.0553324	0.105853
NAT14	protein_coding	ENSG00000090971	-0.258977	4.03782	0.00121963	0.00378525
PITPNM2	protein_coding	ENSG00000090975	0.628591	3.95361	2.70085e-14	3.50325e-13
EXOC1	protein_coding	ENSG00000090989	-0.0610283	5.88524	0.375497	0.500793
RBM27	protein_coding	ENSG00000091009	0.218372	4.69726	0.00358828	0.00988859
POU4F3	protein_coding	ENSG00000091010	0.658847	-1.54754	0.0396918	0.0802869
OSBPL8	protein_coding	ENSG00000091039	0.318126	6.62858	2.46053e-06	1.28283e-05
DTX2	protein_coding	ENSG00000091073	-0.825559	4.61808	1.09541e-28	3.71621e-27
PUS7	protein_coding	ENSG00000091127	0.185115	5.64262	0.00631198	0.0163042
NRCAM	protein_coding	ENSG00000091129	-0.13117	1.47756	0.281913	0.400002
LAMB1	protein_coding	ENSG00000091136	0.742043	8.16676	1.98009e-30	7.32632e-29
SLC26A4	protein_coding	ENSG00000091137	2.45868	-1.54402	1.32692e-06	7.22653e-06
DLD	protein_coding	ENSG00000091140	0.105572	6.41371	0.11288	0.191541
WDR7	protein_coding	ENSG00000091157	-0.0743235	4.40378	0.341913	0.465029
TXNL1	protein_coding	ENSG00000091164	-0.102092	6.35585	0.119299	0.200554
IL5RA	protein_coding	ENSG00000091181	-0.560985	-4.21296	0.398793	0.524586
ABCC6	protein_coding	ENSG00000091262	-1.04993	0.170181	2.36854e-10	2.09208e-09
CMTM6	protein_coding	ENSG00000091317	0.142546	7.01873	0.0267466	0.0572765
ITGA6	protein_coding	ENSG00000091409	0.628076	8.24841	5.91101e-22	1.38098e-20
RAPGEF4	protein_coding	ENSG00000091428	-0.563786	-0.203742	0.00475528	0.0126914
MAP3K20	protein_coding	ENSG00000091436	-0.0992711	7.54706	0.1506	0.243
SMPX	protein_coding	ENSG00000091482	0.712207	-3.04733	0.273782	0.391091
FH	protein_coding	ENSG00000091483	0.0512533	6.48172	0.451231	0.575509
SEL1L3	protein_coding	ENSG00000091490	0.230614	6.387	0.000335663	0.00117842
CDV3	protein_coding	ENSG00000091527	0.553646	9.10599	1.209e-15	1.77136e-14
MYO15A	protein_coding	ENSG00000091536	0.674685	-2.90403	0.250007	0.364479
ALKBH5	protein_coding	ENSG00000091542	-0.158778	6.48457	0.0136755	0.0321681
NLRP1	protein_coding	ENSG00000091592	-0.271561	4.12315	0.000314644	0.00111045
PITPNM3	protein_coding	ENSG00000091622	0.527125	4.45397	2.13578e-11	2.10839e-10
SPAG7	protein_coding	ENSG00000091640	0.142809	4.78685	0.0461064	0.091127
ORC6	protein_coding	ENSG00000091651	-0.101398	5.47057	0.164973	0.261824
ZFHX4	protein_coding	ENSG00000091656	0.107424	5.21877	0.198568	0.303676
CPA1	protein_coding	ENSG00000091704	-0.285919	-4.08803	0.724975	0.81627
ZC3HC1	protein_coding	ENSG00000091732	-0.0523871	3.65107	0.51813	0.637609
ESR1	protein_coding	ENSG00000091831	2.88122	-0.557623	4.34987e-25	1.22688e-23
RGS17	protein_coding	ENSG00000091844	0.43785	2.44743	2.15462e-05	9.52614e-05
ANGPT2	protein_coding	ENSG00000091879	2.9253	-3.14575	0.000530471	0.0017786
TMEM101	protein_coding	ENSG00000091947	-0.319801	4.68658	1.01902e-05	4.79021e-05
CD200	protein_coding	ENSG00000091972	-0.23892	1.87192	0.0328274	0.0682544
CCDC80	protein_coding	ENSG00000091986	0.110497	7.7721	0.0953797	0.166371
PSME1	protein_coding	ENSG00000092010	-0.0887776	5.39671	0.224363	0.334565
PPP2R3C	protein_coding	ENSG00000092020	0.48051	3.9204	3.80691e-08	2.58229e-07
HAUS4	protein_coding	ENSG00000092036	-0.461799	2.7271	8.60795e-07	4.82185e-06
JPH4	protein_coding	ENSG00000092051	-0.170764	5.6418	0.0106305	0.0258461
SLC7A8	protein_coding	ENSG00000092068	0.0755041	1.62334	0.608688	0.71877
OSGEP	protein_coding	ENSG00000092094	-0.111355	5.43831	0.114242	0.193504
SLC22A17	protein_coding	ENSG00000092096	-0.15781	3.98089	0.0511809	0.0993661
RNF31	protein_coding	ENSG00000092098	0.0886067	4.15657	0.287934	0.40694
SCFD1	protein_coding	ENSG00000092108	-0.202739	5.60858	0.00341701	0.0094833
G2E3	protein_coding	ENSG00000092140	-0.196637	5.22307	0.00693666	0.017739
HECTD1	protein_coding	ENSG00000092148	-0.0863668	7.17843	0.209207	0.316133
HNRNPC	protein_coding	ENSG00000092199	0.151439	9.65087	0.0360626	0.0739267
RPGRIP1	protein_coding	ENSG00000092200	-0.403769	-1.80859	0.184205	0.286384
SUPT16H	protein_coding	ENSG00000092201	0.0337609	8.1728	0.615269	0.724623
TOX4	protein_coding	ENSG00000092203	0.122607	6.23295	0.058155	0.110358
GEMIN2	protein_coding	ENSG00000092208	-0.175907	3.56204	0.0385526	0.078265
TGM1	protein_coding	ENSG00000092295	-0.329114	3.49169	0.000211307	0.000775405
TINF2	protein_coding	ENSG00000092330	-0.0812987	4.60044	0.254955	0.370124
SEMA6A	protein_coding	ENSG00000092421	-1.01168	3.10044	5.55106e-30	2.01128e-28
TRPM7	protein_coding	ENSG00000092439	-0.169036	5.54478	0.0153661	0.0355547
TYRO3	protein_coding	ENSG00000092445	-0.361773	5.2909	5.86685e-08	3.88121e-07
WDR76	protein_coding	ENSG00000092470	-0.796753	4.6965	2.12493e-29	7.4611e-28
SNAP23	protein_coding	ENSG00000092531	-0.0841268	6.04739	0.227762	0.338651
TBX15	protein_coding	ENSG00000092607	0.00707998	3.44597	0.92474	0.964586
PHGDH	protein_coding	ENSG00000092621	-0.223882	7.73465	0.000498877	0.00168415
COL9A3	protein_coding	ENSG00000092758	1.19568	-0.966113	2.50454e-06	1.30465e-05
EZR	protein_coding	ENSG00000092820	0.71289	9.22908	2.25455e-25	6.44191e-24
MYL6	protein_coding	ENSG00000092841	-0.189788	6.50666	0.00848902	0.0212287
AGO1	protein_coding	ENSG00000092847	0.223364	6.98618	0.000681821	0.00223048
TEKT2	protein_coding	ENSG00000092850	-0.298546	-3.25104	0.577863	0.692435
CLSPN	protein_coding	ENSG00000092853	-0.0893438	6.5509	0.214078	0.322021
RFFL	protein_coding	ENSG00000092871	-0.328337	3.79701	4.25487e-05	0.000178146
UNC13D	protein_coding	ENSG00000092929	-0.0228715	6.12366	0.733957	0.823727
MFSD11	protein_coding	ENSG00000092931	0.11425	3.77546	0.174334	0.27386
DPYSL2	protein_coding	ENSG00000092964	-0.208258	6.20779	0.00232506	0.00672313
TGFB2	protein_coding	ENSG00000092969	-0.345605	7.43508	6.52142e-07	3.72496e-06
GPATCH2	protein_coding	ENSG00000092978	0.0939789	4.57814	0.215307	0.323525
NUP50	protein_coding	ENSG00000093000	0.203709	7.72726	0.00235791	0.00680468
CDC45	protein_coding	ENSG00000093009	-0.0987147	6.36688	0.135921	0.223294
COMT	protein_coding	ENSG00000093010	-0.0740261	6.00674	0.260351	0.376302
ADA2	protein_coding	ENSG00000093072	1.02177	-3.30024	0.0608024	0.114552
AC016026.1	processed_transcript	ENSG00000093100	0.485031	-0.881037	0.0857462	0.152527
ECHDC1	protein_coding	ENSG00000093144	-0.0224538	6.03151	0.745114	0.83122
LRRFIP2	protein_coding	ENSG00000093167	-0.111576	6.32145	0.094006	0.164296
SEC22C	protein_coding	ENSG00000093183	-0.446547	5.5947	1.25282e-11	1.26686e-10
XYLB	protein_coding	ENSG00000093217	-0.333437	4.09433	1.45213e-05	6.63582e-05
HDAC6	protein_coding	ENSG00000094631	-0.138209	5.77915	0.0341849	0.0706852
CDC6	protein_coding	ENSG00000094804	-0.134036	7.14311	0.0356251	0.0731545
UPRT	protein_coding	ENSG00000094841	-0.164729	3.30014	0.0899306	0.15853
CDC23	protein_coding	ENSG00000094880	-0.0583556	5.72959	0.392857	0.51882
AAAS	protein_coding	ENSG00000094914	-0.0610944	5.70036	0.35173	0.475936
CBX5	protein_coding	ENSG00000094916	0.190678	7.93217	0.00378093	0.0103537
SUCO	protein_coding	ENSG00000094975	0.0408902	6.32171	0.536158	0.654232
MSH2	protein_coding	ENSG00000095002	-0.0569717	6.89297	0.391207	0.517207
MAP3K1	protein_coding	ENSG00000095015	-0.507365	3.99151	2.43318e-10	2.14367e-09
DHPS	protein_coding	ENSG00000095059	-0.518483	0.96486	0.000947665	0.00301339
HOOK2	protein_coding	ENSG00000095066	0.0995522	4.16365	0.195619	0.300158
ARCN1	protein_coding	ENSG00000095139	0.0948239	7.12605	0.176443	0.276506
EPB41L4B	protein_coding	ENSG00000095203	-0.752747	3.81383	1.55749e-16	2.45841e-15
TMEM38B	protein_coding	ENSG00000095209	-0.136659	4.79789	0.054238	0.104298
PSMD5	protein_coding	ENSG00000095261	0.0213869	5.60479	0.738829	0.8268
PTGS1	protein_coding	ENSG00000095303	2.83948	2.70007	1.95559e-139	1.04676e-136
NUP188	protein_coding	ENSG00000095319	0.0950517	7.12293	0.136066	0.223517
CRAT	protein_coding	ENSG00000095321	-0.228925	2.0345	0.0387913	0.07869
SH2D3C	protein_coding	ENSG00000095370	-1.93502	-0.385038	5.2364e-23	1.30975e-21
NANS	protein_coding	ENSG00000095380	0.16076	6.16835	0.0133594	0.0315046
TBC1D2	protein_coding	ENSG00000095383	0.0608254	4.12312	0.544363	0.662025
WHRN	protein_coding	ENSG00000095397	0.792405	3.26409	2.36468e-17	4.01112e-16
PDE6C	protein_coding	ENSG00000095464	-0.0824808	-2.30723	0.862202	0.921387
CWF19L1	protein_coding	ENSG00000095485	-0.0202591	5.08124	0.779402	0.857694
SEMA4G	protein_coding	ENSG00000095539	-0.378578	2.48457	0.000103289	0.000404016
BTAF1	protein_coding	ENSG00000095564	0.23799	6.62381	0.000342862	0.00120124
IKZF5	protein_coding	ENSG00000095574	0.325027	4.39438	1.25029e-05	5.80043e-05
TLL2	protein_coding	ENSG00000095587	-0.0678541	1.73588	0.590823	0.703607
CYP26A1	protein_coding	ENSG00000095596	-1.17772	-3.99331	0.0449595	0.0891676
SORBS1	protein_coding	ENSG00000095637	0.264411	3.3825	0.004812	0.012823
CRTAC1	protein_coding	ENSG00000095713	0.187732	0.497525	0.253587	0.368538
BAMBI	protein_coding	ENSG00000095739	0.221703	3.01169	0.0175864	0.0399702
IL11	protein_coding	ENSG00000095752	3.38702	6.87358	2.30625e-62	2.75003e-60
MYO3A	protein_coding	ENSG00000095777	-0.229423	3.17428	0.00870126	0.0216874
WAC	protein_coding	ENSG00000095787	-0.0921653	7.5688	0.19294	0.296766
CREM	protein_coding	ENSG00000095794	0.797159	4.52822	4.0624e-17	6.8094e-16
NUBP2	protein_coding	ENSG00000095906	-0.240927	5.4556	0.00100549	0.00317923
SMIM24	protein_coding	ENSG00000095932	2.62598	-2.73926	4.73174e-07	2.75564e-06
HIVEP1	protein_coding	ENSG00000095951	1.03521	5.08341	1.2806e-43	7.94998e-42
TREM2	protein_coding	ENSG00000095970	-0.0555976	-3.01247	0.929885	0.968652
FKBP5	protein_coding	ENSG00000096060	0.296576	5.98214	2.6327e-05	0.000114755
SRPK1	protein_coding	ENSG00000096063	0.0546944	7.15208	0.402749	0.528436
BRPF3	protein_coding	ENSG00000096070	-0.389015	6.4874	3.01993e-09	2.36402e-08
MRPS18A	protein_coding	ENSG00000096080	-0.148093	5.56861	0.0247815	0.0536647
TMEM14A	protein_coding	ENSG00000096092	-0.445364	4.6957	8.26223e-10	6.89579e-09
EFHC1	protein_coding	ENSG00000096093	-0.492283	5.39159	5.46989e-14	6.89162e-13
HSP90AB1	protein_coding	ENSG00000096384	0.319671	11.7467	2.08807e-06	1.10176e-05
CDC5L	protein_coding	ENSG00000096401	-0.0247769	7.15	0.720645	0.813106
ITPR3	protein_coding	ENSG00000096433	0.244482	6.70652	0.000450956	0.00153638
ZNF184	protein_coding	ENSG00000096654	-0.660726	3.86583	1.43697e-13	1.74194e-12
DSP	protein_coding	ENSG00000096696	1.25821	3.23725	1.33618e-37	6.81874e-36
SIRT1	protein_coding	ENSG00000096717	-0.0535993	5.50071	0.436569	0.561343
HNRNPH3	protein_coding	ENSG00000096746	0.357375	8.97092	4.58211e-07	2.67692e-06
IFT74	protein_coding	ENSG00000096872	-0.50143	4.73373	3.45847e-10	2.99763e-09
JAK2	protein_coding	ENSG00000096968	-0.085926	3.50828	0.333499	0.456083
IL12RB1	protein_coding	ENSG00000096996	1.62675	-3.5064	0.00719349	0.0183199
ABL1	protein_coding	ENSG00000097007	0.252829	7.20852	9.17371e-05	0.000361857
ACOT7	protein_coding	ENSG00000097021	-0.00352205	5.87618	0.956918	0.988646
SH3GLB1	protein_coding	ENSG00000097033	0.0298101	6.41613	0.652059	0.755903
CDC7	protein_coding	ENSG00000097046	-0.376638	5.33494	6.0844e-08	4.01631e-07
SYDE2	protein_coding	ENSG00000097096	-0.514064	4.12537	8.40902e-12	8.63376e-11
PCSK5	protein_coding	ENSG00000099139	0.353847	4.70305	1.46806e-06	7.93026e-06
SCD	protein_coding	ENSG00000099194	-0.251499	9.65144	0.000375102	0.00130207
TMED1	protein_coding	ENSG00000099203	0.0544581	4.77844	0.455065	0.579251
ABLIM1	protein_coding	ENSG00000099204	-0.520114	7.40788	1.47958e-13	1.79179e-12
ERMP1	protein_coding	ENSG00000099219	-0.157527	4.27369	0.0367767	0.0751414
RAB18	protein_coding	ENSG00000099246	0.162222	6.28334	0.0170023	0.0388369
NRP1	protein_coding	ENSG00000099250	1.30966	7.1607	2.70811e-90	6.52301e-88
HSD17B7P2	transcribed_unprocessed_pseudogene	ENSG00000099251	-1.17572	1.39047	3.47716e-15	4.88649e-14
PRTFDC1	protein_coding	ENSG00000099256	-0.177538	3.47515	0.0454048	0.0899691
PALMD	protein_coding	ENSG00000099260	-2.53643	-3.90226	8.45509e-05	0.000336402
TSPAN15	protein_coding	ENSG00000099282	0.650729	-1.90035	0.0395389	0.0800246
H2AFY2	protein_coding	ENSG00000099284	-0.365785	5.078	1.61099e-07	1.00139e-06
WASHC2A	protein_coding	ENSG00000099290	-0.240615	6.17889	0.000218585	0.000799919
MAST3	protein_coding	ENSG00000099308	-0.00115933	3.54389	0.96227	0.99277
MZF1	protein_coding	ENSG00000099326	0.177127	3.33053	0.0926763	0.162562
OCEL1	protein_coding	ENSG00000099330	-0.340242	1.92709	0.00212532	0.00620684
MYO9B	protein_coding	ENSG00000099331	0.131122	6.68538	0.0545019	0.10468
KCNK6	protein_coding	ENSG00000099337	0.68587	4.47474	1.46198e-18	2.71719e-17
CATSPERG	protein_coding	ENSG00000099338	0.11012	0.951719	0.510655	0.6311
PSMD8	protein_coding	ENSG00000099341	0.0840521	7.76972	0.209779	0.316819
FBXL19	protein_coding	ENSG00000099364	0.0537076	6.19967	0.414233	0.539838
STX1B	protein_coding	ENSG00000099365	0.240315	2.18162	0.0410846	0.0826944
HSD3B7	protein_coding	ENSG00000099377	-0.0414968	1.50338	0.764748	0.846891
SETD1A	protein_coding	ENSG00000099381	0.0338091	6.15238	0.632512	0.739131
BCL7C	protein_coding	ENSG00000099385	-0.131707	6.02016	0.0598548	0.113103
MAGEB2	protein_coding	ENSG00000099399	0.0508341	6.31037	0.430507	0.555445
EFNA2	protein_coding	ENSG00000099617	0.56289	1.75573	6.01858e-06	2.94414e-05
CIRBP	protein_coding	ENSG00000099622	0.512176	5.94789	2.74252e-13	3.2287e-12
ATP5F1D	protein_coding	ENSG00000099624	-0.162896	4.77589	0.0418714	0.0840743
CBARP	protein_coding	ENSG00000099625	0.660161	4.09531	5.47049e-14	6.89162e-13
HNRNPM	protein_coding	ENSG00000099783	0.0950374	8.88422	0.15895	0.254121
2019-03-02	protein_coding	ENSG00000099785	-0.421038	2.27009	6.78112e-05	0.000274469
NDUFB7	protein_coding	ENSG00000099795	-0.141566	4.79188	0.0480679	0.0942613
TECR	protein_coding	ENSG00000099797	-0.152014	5.39234	0.0363951	0.074507
TIMM13	protein_coding	ENSG00000099800	-0.117121	5.19232	0.102487	0.176859
CDC34	protein_coding	ENSG00000099804	-0.0520895	5.46715	0.460142	0.583892
MTAP	protein_coding	ENSG00000099810	1.06149	5.96889	6.69195e-52	5.59684e-50
MISP	protein_coding	ENSG00000099812	-0.313985	4.92859	1.5e-05	6.83704e-05
CEP170B	protein_coding	ENSG00000099814	0.407994	6.8047	6.34017e-10	5.34531e-09
POLR2E	protein_coding	ENSG00000099817	-0.158047	6.60548	0.0151922	0.0352028
POLRMT	protein_coding	ENSG00000099821	0.212542	6.01669	0.00142305	0.00434327
HCN2	protein_coding	ENSG00000099822	0.235583	3.2094	0.0106703	0.0259292
CDHR5	protein_coding	ENSG00000099834	0.336117	-3.86688	0.864708	0.923278
IZUMO4	protein_coding	ENSG00000099840	-0.0520245	-1.56777	0.876087	0.930611
RASSF7	protein_coding	ENSG00000099849	-0.722788	3.82366	2.04265e-18	3.7501e-17
GADD45B	protein_coding	ENSG00000099860	-0.506425	5.07778	3.2067e-13	3.76045e-12
PALM	protein_coding	ENSG00000099864	-0.291657	4.75129	6.24526e-05	0.000253975
MADCAM1	protein_coding	ENSG00000099866	-0.862087	-0.980535	0.00016381	0.000615263
IGF2-AS	antisense	ENSG00000099869	0.322583	-2.60727	0.49293	0.614551
MKNK2	protein_coding	ENSG00000099875	0.187037	6.0924	0.00374157	0.0102634
ARVCF	protein_coding	ENSG00000099889	-1.21151	5.54328	1.04403e-69	1.62243e-67
TRMT2A	protein_coding	ENSG00000099899	-0.479438	5.08017	2.05484e-11	2.03515e-10
RANBP1	protein_coding	ENSG00000099901	0.0318951	8.72501	0.632529	0.739131
ZDHHC8	protein_coding	ENSG00000099904	-0.351932	6.57163	6.87239e-06	3.33136e-05
KLHL22	protein_coding	ENSG00000099910	-0.391708	3.58082	2.2944e-06	1.20063e-05
MED15	protein_coding	ENSG00000099917	-0.179238	7.17107	0.0112121	0.0270742
SERPIND1	protein_coding	ENSG00000099937	4.90294	-1.43286	3.44469e-20	7.17133e-19
SNAP29	protein_coding	ENSG00000099940	-0.169963	6.57343	0.00866859	0.0216172
CRKL	protein_coding	ENSG00000099942	-0.399671	7.78724	2.7814e-10	2.43443e-09
LZTR1	protein_coding	ENSG00000099949	-0.299892	4.09301	0.000692013	0.00226044
MMP11	protein_coding	ENSG00000099953	-2.6601	-3.63231	2.81485e-06	1.4559e-05
CECR2	protein_coding	ENSG00000099954	0.00412265	4.63465	0.966199	0.995916
SMARCB1	protein_coding	ENSG00000099956	-0.0399559	7.23116	0.534014	0.652404
P2RX6	protein_coding	ENSG00000099957	-0.67822	1.36253	2.17096e-06	1.14025e-05
BCL2L13	protein_coding	ENSG00000099968	0.0444802	5.71124	0.501047	0.622259
DDTL	protein_coding	ENSG00000099974	-0.578442	0.140227	0.000999129	0.003162
DDT	protein_coding	ENSG00000099977	-0.804977	-3.38703	0.363025	0.487521
GSTT2	polymorphic_pseudogene	ENSG00000099984	-0.289722	-0.358407	0.154335	0.247832
OSM	protein_coding	ENSG00000099985	2.1119	-4.09023	0.0102979	0.0251364
CABIN1	protein_coding	ENSG00000099991	0.158758	7.2061	0.0144024	0.0336087
TBC1D10A	protein_coding	ENSG00000099992	-0.0798673	3.60453	0.364292	0.48895
SUSD2	protein_coding	ENSG00000099994	-0.281694	1.36949	0.0471666	0.0928112
SF3A1	protein_coding	ENSG00000099995	-0.232734	7.45721	0.000260268	0.000935684
GGT5	protein_coding	ENSG00000099998	0.564166	-2.31419	0.108028	0.184753
RNF215	protein_coding	ENSG00000099999	-0.00609803	4.51113	0.933141	0.970849
SEC14L2	protein_coding	ENSG00000100003	0.000824964	3.49834	0.988411	1
SEC14L3	protein_coding	ENSG00000100012	-0.532304	-2.66383	0.209837	0.316867
SPECC1L	protein_coding	ENSG00000100014	-0.348338	5.59125	1.46257e-07	9.15273e-07
PPIL2	protein_coding	ENSG00000100023	-0.104198	6.39839	0.107062	0.183284
UPB1	protein_coding	ENSG00000100024	-0.748346	-2.57717	0.143606	0.233766
YPEL1	protein_coding	ENSG00000100027	-0.723688	1.4186	6.15244e-09	4.63395e-08
SNRPD3	protein_coding	ENSG00000100028	0.12377	8.05506	0.147227	0.238613
PES1	protein_coding	ENSG00000100029	0.383396	7.78226	1.28337e-08	9.27192e-08
MAPK1	protein_coding	ENSG00000100030	-0.105839	7.75603	0.0975085	0.169605
GGT1	protein_coding	ENSG00000100031	0.0508526	3.96155	0.64855	0.753322
PPM1F	protein_coding	ENSG00000100034	-0.172012	6.74609	0.00896973	0.0222828
SLC35E4	protein_coding	ENSG00000100036	0.913058	5.06013	1.92348e-39	1.04584e-37
TOP3B	protein_coding	ENSG00000100038	-0.323747	5.47239	8.70701e-07	4.86942e-06
CRYBB3	protein_coding	ENSG00000100053	-0.388175	0.119655	0.0384944	0.0781734
CYTH4	protein_coding	ENSG00000100055	2.99879	1.04156	1.66042e-67	2.39489e-65
ESS2	protein_coding	ENSG00000100056	0.0733299	4.86086	0.307793	0.428891
CRYBB2P1	transcribed_unprocessed_pseudogene	ENSG00000100058	0.0346957	5.60521	0.597755	0.709198
MFNG	protein_coding	ENSG00000100060	0.642041	2.71289	8.20237e-09	6.09598e-08
CARD10	protein_coding	ENSG00000100065	0.703842	6.57936	9.38893e-26	2.74789e-24
LRP5L	protein_coding	ENSG00000100068	0.152239	3.84004	0.146014	0.236902
SLC25A1	protein_coding	ENSG00000100075	-0.280544	5.93395	2.43591e-05	0.000106796
GRK3	protein_coding	ENSG00000100077	0.0715803	6.4161	0.262074	0.378157
PLA2G3	protein_coding	ENSG00000100078	0.439889	-3.55254	0.49543	0.617192
GGA1	protein_coding	ENSG00000100083	-0.0393237	5.80789	0.557089	0.674166
HIRA	protein_coding	ENSG00000100084	0.196857	4.09589	0.0152316	0.035284
SH3BP1	protein_coding	ENSG00000100092	0.38015	2.52357	0.000261949	0.000941447
SEZ6L	protein_coding	ENSG00000100095	0.23714	-1.69263	0.52752	0.646142
LGALS1	protein_coding	ENSG00000100097	-0.0215012	9.07689	0.761519	0.843925
HPS4	protein_coding	ENSG00000100099	-0.293996	7.84548	2.82738e-06	1.46144e-05
[truncated: 22,088 more rows]

## Sheet: S_vs_G2
gene_names	bio_type	ensemble_id	logFC	logCPM	PValue	FDR
TSPAN6	protein_coding	ENSG00000000003	-0.117998	5.2183	0.0840869	0.156789
DPM1	protein_coding	ENSG00000000419	0.0582659	6.761	0.527167	0.657263
SCYL3	protein_coding	ENSG00000000457	0.102912	2.54455	0.336217	0.469884
C1orf112	protein_coding	ENSG00000000460	0.190588	4.61937	0.0109467	0.0281084
CFH	protein_coding	ENSG00000000971	-0.0534925	0.477974	0.768917	0.856079
FUCA2	protein_coding	ENSG00000001036	-0.136174	6.77687	0.0307925	0.0677659
GCLC	protein_coding	ENSG00000001084	-0.103141	5.70717	0.12402	0.214622
NFYA	protein_coding	ENSG00000001167	0.50184	6.75872	6.51395e-14	1.05374e-12
STPG1	protein_coding	ENSG00000001460	0.13075	3.31765	0.163384	0.268689
NIPAL3	protein_coding	ENSG00000001461	0.206574	4.65734	0.00318039	0.00961422
LAS1L	protein_coding	ENSG00000001497	-0.0139654	6.81317	0.834371	0.904274
ENPP4	protein_coding	ENSG00000001561	-0.633302	4.3141	3.42722e-17	7.77321e-16
SEMA3F	protein_coding	ENSG00000001617	-0.342216	5.55522	4.75706e-07	3.13069e-06
ANKIB1	protein_coding	ENSG00000001629	0.357154	6.66289	1.03563e-07	7.62854e-07
CYP51A1	protein_coding	ENSG00000001630	-0.325266	2.93936	0.0091454	0.0241067
KRIT1	protein_coding	ENSG00000001631	0.548633	2.6312	1.42503e-07	1.02738e-06
RAD52	protein_coding	ENSG00000002016	0.624539	3.7071	2.06292e-11	2.5172e-10
MYH16	transcribed_unitary_pseudogene	ENSG00000002079	0.650453	3.17598	4.56113e-12	6.07319e-11
BAD	protein_coding	ENSG00000002330	-0.519636	4.97248	6.20868e-12	8.12764e-11
LAP3	protein_coding	ENSG00000002549	0.0512159	6.18588	0.466792	0.601456
CD99	protein_coding	ENSG00000002586	-0.064919	5.87907	0.321519	0.454165
AOC1	protein_coding	ENSG00000002726	-0.899182	-4.06735	0.377985	0.51406
HECW1	protein_coding	ENSG00000002746	0.271251	1.58204	0.0340563	0.0736964
MAD1L1	protein_coding	ENSG00000002822	0.437926	6.56147	6.11258e-12	8.0149e-11
LASP1	protein_coding	ENSG00000002834	0.0602596	9.40078	0.358293	0.493522
SNX11	protein_coding	ENSG00000002919	0.183549	3.98236	0.0208982	0.0489045
TMEM176A	protein_coding	ENSG00000002933	-0.107038	-0.433026	0.707486	0.80856
M6PR	protein_coding	ENSG00000003056	0.0874148	8.0521	0.186906	0.298679
KLHL13	protein_coding	ENSG00000003096	-0.390977	2.30993	0.000340688	0.00130859
CYP26B1	protein_coding	ENSG00000003137	-0.354021	5.0286	2.30785e-07	1.60338e-06
ICA1	protein_coding	ENSG00000003147	-0.637103	0.247671	0.00087089	0.00304325
DBNDD1	protein_coding	ENSG00000003249	-0.237176	3.42513	0.0109936	0.0282066
ALS2	protein_coding	ENSG00000003393	0.276855	5.95281	3.24777e-05	0.000154634
CASP10	protein_coding	ENSG00000003400	0.442367	0.358882	0.00882893	0.0233567
CFLAR	protein_coding	ENSG00000003402	0.170869	5.1603	0.0125225	0.0315611
TFPI	protein_coding	ENSG00000003436	-0.309079	5.40839	6.07751e-06	3.29779e-05
NDUFAF7	protein_coding	ENSG00000003509	0.426062	5.10878	2.83147e-09	2.62415e-08
RBM5	protein_coding	ENSG00000003756	0.577695	6.15735	2.65585e-19	7.36151e-18
MTMR7	protein_coding	ENSG00000003987	-0.0910545	-1.79255	0.766651	0.854566
SLC7A2	protein_coding	ENSG00000003989	0.532204	5.86518	2.61753e-16	5.4777e-15
ARF5	protein_coding	ENSG00000004059	-0.187449	5.31567	0.0060131	0.0167811
SARM1	protein_coding	ENSG00000004139	-0.434478	1.28884	0.00354876	0.0105896
POLDIP2	protein_coding	ENSG00000004142	-0.189229	7.00228	0.0031943	0.00964898
PLXND1	protein_coding	ENSG00000004399	-0.241808	6.87516	0.000667284	0.00239429
AK2	protein_coding	ENSG00000004455	0.0535907	7.68593	0.409559	0.546334
FKBP4	protein_coding	ENSG00000004478	0.263982	8.87506	3.58945e-05	0.000169494
KDM1A	protein_coding	ENSG00000004487	0.262428	7.32299	4.35535e-05	0.000202056
RBM6	protein_coding	ENSG00000004534	0.655405	7.0764	3.26813e-24	1.299e-22
CAMKK1	protein_coding	ENSG00000004660	-0.555293	4.50503	2.03603e-14	3.4683e-13
RECQL	protein_coding	ENSG00000004700	-0.144695	7.18237	0.0341201	0.0738213
VPS50	protein_coding	ENSG00000004766	0.394549	3.93915	1.72716e-06	1.03411e-05
HSPB6	protein_coding	ENSG00000004776	0.248495	-1.09869	0.396742	0.533278
ARHGAP33	protein_coding	ENSG00000004777	0.584679	3.60313	1.10714e-09	1.08313e-08
NDUFAB1	protein_coding	ENSG00000004779	-0.219811	5.31689	0.0025038	0.00779386
PDK4	protein_coding	ENSG00000004799	-1.07343	-0.338028	3.70983e-06	2.08782e-05
SLC22A16	protein_coding	ENSG00000004809	1.02119	-3.76027	0.174288	0.282984
ZMYND10	protein_coding	ENSG00000004838	0.329384	0.476613	0.0576728	0.114793
ABCB5	protein_coding	ENSG00000004846	-0.797308	-1.98398	0.037296	0.0796903
ARX	protein_coding	ENSG00000004848	-1.38293	-3.62166	0.0560642	0.112142
SLC25A13	protein_coding	ENSG00000004864	0.0253699	5.77292	0.715626	0.814578
ST7	protein_coding	ENSG00000004866	0.228211	4.25641	0.00376614	0.0111375
CDC27	protein_coding	ENSG00000004897	0.472707	7.44439	5.41846e-12	7.16325e-11
CALCR	protein_coding	ENSG00000004948	-0.309267	-2.20808	0.472758	0.606968
HCCS	protein_coding	ENSG00000004961	0.0868266	4.52653	0.242864	0.366189
DVL2	protein_coding	ENSG00000004975	0.127665	4.72456	0.0719556	0.137949
PRSS22	protein_coding	ENSG00000005001	-0.758476	-3.42912	0.141903	0.239423
UPF1	protein_coding	ENSG00000005007	0.0813284	6.82704	0.2055	0.321973
SKAP2	protein_coding	ENSG00000005020	-0.750315	-2.89732	0.12103	0.21038
SLC25A5	protein_coding	ENSG00000005022	-0.191637	8.01535	0.00249213	0.00776156
MCUB	protein_coding	ENSG00000005059	-0.331938	3.78253	5.54936e-05	0.000253014
HOXA11	protein_coding	ENSG00000005073	-0.210147	3.85176	0.00958488	0.0250892
POLR2J	protein_coding	ENSG00000005075	-0.13843	5.75969	0.0417899	0.0876365
DHX33	protein_coding	ENSG00000005100	0.0744455	6.30048	0.262906	0.389364
MEOX1	protein_coding	ENSG00000005102	-0.12537	-0.870242	0.664053	0.774391
THSD7A	protein_coding	ENSG00000005108	0.544936	-2.42918	0.172099	0.280101
LIG3	protein_coding	ENSG00000005156	0.491126	5.69144	7.58285e-13	1.0937e-11
RPAP3	protein_coding	ENSG00000005175	0.244596	6.43705	0.000485717	0.00179909
ACSM3	protein_coding	ENSG00000005187	0.686681	0.490349	0.000110142	0.00047139
REXO5	protein_coding	ENSG00000005189	-0.359078	3.13622	6.35953e-05	0.000286056
CIAPIN1	protein_coding	ENSG00000005194	0.0319908	5.18094	0.66006	0.771164
SPPL2B	protein_coding	ENSG00000005206	0.424858	3.9836	0.0230983	0.0531545
FAM214B	protein_coding	ENSG00000005238	0.0349985	5.3741	0.606423	0.726856
COPZ2	protein_coding	ENSG00000005243	-0.246238	2.92543	0.00919481	0.0242261
PRKAR2B	protein_coding	ENSG00000005249	-0.34766	4.99366	1.18793e-06	7.32369e-06
MSL3	protein_coding	ENSG00000005302	0.346491	5.25838	6.21173e-07	4.00594e-06
CREBBP	protein_coding	ENSG00000005339	0.777479	7.54064	8.7364e-29	4.62491e-27
TSPOAP1	protein_coding	ENSG00000005379	-0.364	0.25538	0.0427347	0.0893456
MPO	protein_coding	ENSG00000005381	-0.657055	-1.43448	0.0116958	0.0297672
GCFC2	protein_coding	ENSG00000005436	-0.416563	4.42677	3.48687e-07	2.35393e-06
WDR54	protein_coding	ENSG00000005448	-0.150426	4.71108	0.0436555	0.0909431
CROT	protein_coding	ENSG00000005469	-0.175486	2.59327	0.0915948	0.168326
ABCB4	protein_coding	ENSG00000005471	-1.1358	2.25998	6.5327e-23	2.36977e-21
KMT2E	protein_coding	ENSG00000005483	1.01133	5.87571	1.98937e-47	2.99487e-45
RHBDD2	protein_coding	ENSG00000005486	0.128854	5.7744	0.0700736	0.135143
SOX8	protein_coding	ENSG00000005513	-1.74313	2.09253	4.55566e-53	8.50637e-51
IBTK	protein_coding	ENSG00000005700	0.264072	5.63251	0.000119178	0.000504507
ZNF195	protein_coding	ENSG00000005801	0.0449682	5.08469	0.504635	0.636461
MYCBP2	protein_coding	ENSG00000005810	0.530253	6.18051	4.33001e-11	5.07774e-10
FBXL3	protein_coding	ENSG00000005812	0.121597	5.19622	0.0832656	0.155515
PDK2	protein_coding	ENSG00000005882	-0.0648119	4.677	0.383991	0.520202
ITGA3	protein_coding	ENSG00000005884	-0.0806406	9.70144	0.212376	0.330274
ZFX	protein_coding	ENSG00000005889	0.173328	4.53295	0.0189187	0.0449211
LAMP2	protein_coding	ENSG00000005893	-0.00856121	7.39214	0.891547	0.944991
ITGA2B	protein_coding	ENSG00000005961	0.394738	-1.10513	0.120807	0.210056
ASB4	protein_coding	ENSG00000005981	-0.0541481	-2.62949	1	1
GDE1	protein_coding	ENSG00000006007	-0.000401624	6.15075	0.990911	1
REX1BD	protein_coding	ENSG00000006015	-0.188474	4.14546	0.0191597	0.0454222
CRLF1	protein_coding	ENSG00000006016	-0.139361	2.58653	0.253968	0.379131
OSBPL7	protein_coding	ENSG00000006025	0.356165	3.68297	0.000207839	0.000838562
TMEM98	protein_coding	ENSG00000006042	-0.590708	6.03336	3.18784e-19	8.74549e-18
YBX2	protein_coding	ENSG00000006047	0.220635	2.91733	0.0268825	0.0603803
KRT33A	protein_coding	ENSG00000006059	-1.58814	-2.6558	0.000209927	0.000846138
MAP3K14	protein_coding	ENSG00000006062	-0.628657	5.06633	5.03593e-16	1.02536e-14
ABCC8	protein_coding	ENSG00000006071	-0.557588	0.837843	0.000205054	0.000828994
TMEM132A	protein_coding	ENSG00000006118	-0.175147	6.40153	0.0133141	0.0332363
AP2B1	protein_coding	ENSG00000006125	0.0359905	8.18075	0.587963	0.71134
TAC1	protein_coding	ENSG00000006128	-0.877449	-3.48987	0.336664	0.470318
ZNF263	protein_coding	ENSG00000006194	0.254706	5.78633	0.0001334	0.000559731
CX3CL1	protein_coding	ENSG00000006210	-1.08766	3.53064	8.9965e-32	5.62854e-30
SPATA20	protein_coding	ENSG00000006282	0.145331	6.25095	0.0235144	0.0539882
CACNA1G	protein_coding	ENSG00000006283	0.266061	3.21936	0.128835	0.221219
TNFRSF12A	protein_coding	ENSG00000006327	-0.643533	7.59992	1.5506e-20	4.83798e-19
MAP3K9	protein_coding	ENSG00000006432	0.42251	6.03949	2.88145e-10	3.03478e-09
RALA	protein_coding	ENSG00000006451	0.0469932	6.43652	0.507837	0.639228
BAIAP2L1	protein_coding	ENSG00000006453	0.0978192	5.55052	0.1599	0.264001
KDM7A	protein_coding	ENSG00000006459	-0.741979	4.08819	3.10454e-12	4.21527e-11
ETV1	protein_coding	ENSG00000006468	0.570765	1.65894	5.6726e-06	3.08991e-05
AGK	protein_coding	ENSG00000006530	0.0930405	4.83895	0.205753	0.322234
ALDH3B1	protein_coding	ENSG00000006534	-0.338237	4.72913	4.98199e-06	2.74139e-05
PHTF2	protein_coding	ENSG00000006576	-0.319741	6.73262	1.47456e-06	8.93077e-06
CCL26	protein_coding	ENSG00000006606	-0.454771	2.10463	8.81524e-05	0.000385989
FARP2	protein_coding	ENSG00000006607	-0.126239	5.90204	0.0598941	0.118446
USH1C	protein_coding	ENSG00000006611	-0.184541	-0.215744	0.409259	0.54614
GGCT	protein_coding	ENSG00000006625	-0.380533	4.03598	0.000271661	0.0010673
DBF4	protein_coding	ENSG00000006634	1.04209	6.4827	1.60738e-40	1.69069e-38
TBXA2R	protein_coding	ENSG00000006638	-0.116355	0.245965	0.626205	0.743538
IFRD1	protein_coding	ENSG00000006652	-0.332621	5.47057	2.28756e-06	1.33967e-05
COX10	protein_coding	ENSG00000006695	0.17983	3.91915	0.0312528	0.0686286
GTF2IRD1	protein_coding	ENSG00000006704	0.0192391	5.26476	0.785877	0.868681
PAF1	protein_coding	ENSG00000006712	0.302217	7.06347	8.61992e-06	4.55924e-05
VPS41	protein_coding	ENSG00000006715	-0.0320223	6.01133	0.629874	0.746351
ARHGAP44	protein_coding	ENSG00000006740	-0.222769	2.67151	0.0308202	0.0678145
ELAC2	protein_coding	ENSG00000006744	0.273891	6.31711	2.62941e-05	0.000127357
SCIN	protein_coding	ENSG00000006747	0.21977	-0.260651	0.264286	0.391071
ARSD	protein_coding	ENSG00000006756	-0.0504001	-3.08388	0.890679	0.944525
PNPLA4	protein_coding	ENSG00000006757	-0.332389	2.58947	0.0021775	0.00688223
ADIPOR2	protein_coding	ENSG00000006831	0.146172	7.75287	0.0291056	0.0646144
CDKL3	protein_coding	ENSG00000006837	-0.103875	0.518837	0.545334	0.673419
UPP2	protein_coding	ENSG00000007001	-0.567329	-2.98036	0.355462	0.490524
MARK4	protein_coding	ENSG00000007047	-0.20372	5.07643	0.00307808	0.00934244
PROM1	protein_coding	ENSG00000007062	0.354213	-3.58857	0.520212	0.650758
CCDC124	protein_coding	ENSG00000007080	-0.0748765	6.30495	0.280291	0.409422
CEACAM21	protein_coding	ENSG00000007129	-0.636309	-3.38272	0.294068	0.425239
PAFAH1B1	protein_coding	ENSG00000007168	0.35814	6.08714	3.06366e-08	2.44595e-07
NOS2	protein_coding	ENSG00000007171	-0.861304	1.41939	2.93021e-09	2.70525e-08
DNAH9	protein_coding	ENSG00000007174	-0.0845358	-3.58376	1	1
KIAA0100	protein_coding	ENSG00000007202	0.0048027	8.64592	0.942007	0.980121
SLC13A2	protein_coding	ENSG00000007216	-0.45049	-2.53722	0.210211	0.327678
GAS7	protein_coding	ENSG00000007237	-0.215028	2.8222	0.0332372	0.0722158
TRAPPC6A	protein_coding	ENSG00000007255	-0.412062	1.45561	0.00160542	0.00525475
MATK	protein_coding	ENSG00000007264	-0.00510034	-0.00383931	0.956777	0.991349
SCN4A	protein_coding	ENSG00000007314	0.973266	0.52873	9.63349e-09	8.26949e-08
ST7L	protein_coding	ENSG00000007341	0.209655	4.59966	0.00711604	0.0194089
TKTL1	protein_coding	ENSG00000007350	-0.30586	-3.61861	0.655086	0.767011
RPUSD1	protein_coding	ENSG00000007376	-0.162854	5.19031	0.0321214	0.0702413
RHBDF1	protein_coding	ENSG00000007384	0.128692	5.02066	0.0698635	0.134808
LUC7L	protein_coding	ENSG00000007392	0.748209	5.65094	3.29345e-28	1.67715e-26
CACNA2D2	protein_coding	ENSG00000007402	-0.242484	1.58936	0.0607984	0.119801
BAIAP3	protein_coding	ENSG00000007516	0.00808231	2.13494	0.922691	0.965746
TSR3	protein_coding	ENSG00000007520	0.0356042	5.94947	0.602749	0.723929
PIGQ	protein_coding	ENSG00000007541	-0.122617	4.02233	0.168954	0.275904
CRAMP1	protein_coding	ENSG00000007545	-0.178953	4.61885	0.0176038	0.042246
TEAD3	protein_coding	ENSG00000007866	-0.372156	5.58917	1.61549e-08	1.34598e-07
DNAJC11	protein_coding	ENSG00000007923	0.257402	5.88686	7.23562e-05	0.000322047
MYLIP	protein_coding	ENSG00000007944	0.388381	3.52973	1.07022e-05	5.5653e-05
E2F2	protein_coding	ENSG00000007968	-0.0439344	3.79886	0.670833	0.77981
PSMB1	protein_coding	ENSG00000008018	-0.0409033	7.23636	0.544491	0.672675
SYN1	protein_coding	ENSG00000008056	-0.383264	2.22943	0.000289715	0.0011312
JARID2	protein_coding	ENSG00000008083	0.0257507	5.74578	0.719603	0.817367
CDKL5	protein_coding	ENSG00000008086	-0.317088	3.4944	0.000382442	0.00145367
CAMK1G	protein_coding	ENSG00000008118	0.0261484	-3.00617	1	1
CDK11A	protein_coding	ENSG00000008128	0.0627693	-1.23689	0.818183	0.892795
NADK	protein_coding	ENSG00000008130	-0.255142	4.87398	0.00052231	0.00192016
DLEC1	protein_coding	ENSG00000008226	-0.272705	-3.42773	0.631269	0.747304
CYTH3	protein_coding	ENSG00000008256	0.417282	7.81501	8.90511e-11	1.00279e-09
ADAM22	protein_coding	ENSG00000008277	0.07411	2.90196	0.432819	0.569191
SYPL1	protein_coding	ENSG00000008282	0.258299	6.72751	8.52899e-05	0.000374272
CYB561	protein_coding	ENSG00000008283	0.145615	5.82257	0.0257404	0.0582237
SPAG9	protein_coding	ENSG00000008294	-0.0438648	7.30539	0.501793	0.633829
CELSR3	protein_coding	ENSG00000008300	0.0421248	5.49078	0.545841	0.673859
AASS	protein_coding	ENSG00000008311	0.135164	4.04107	0.0779109	0.14716
SS18L2	protein_coding	ENSG00000008324	-0.421265	3.70079	2.23964e-06	1.31448e-05
MPND	protein_coding	ENSG00000008382	0.040736	2.21171	0.665258	0.775347
MGST1	protein_coding	ENSG00000008394	-0.275151	4.0271	0.00071604	0.0025476
CRY1	protein_coding	ENSG00000008405	0.122679	5.76516	0.0680753	0.131928
NFIX	protein_coding	ENSG00000008441	0.100671	5.92758	0.123232	0.213484
ST3GAL1	protein_coding	ENSG00000008513	-0.3864	7.54044	1.36748e-08	1.15303e-07
MMP25	protein_coding	ENSG00000008516	-0.645267	0.325827	0.000695602	0.00248369
IL32	protein_coding	ENSG00000008517	-0.323752	3.96747	5.60295e-05	0.000255264
PKD1	protein_coding	ENSG00000008710	0.0578117	6.34893	0.407607	0.544394
MAPK8IP2	protein_coding	ENSG00000008735	-0.220719	-1.06613	0.438664	0.574869
MED24	protein_coding	ENSG00000008838	0.263727	5.60908	7.64294e-05	0.000338473
RHOBTB2	protein_coding	ENSG00000008853	-0.106147	5.39111	0.127495	0.219293
HEATR5B	protein_coding	ENSG00000008869	0.0987534	5.11706	0.145773	0.244787
SEC62	protein_coding	ENSG00000008952	0.354684	7.19744	3.3729e-08	2.67511e-07
RPS20	protein_coding	ENSG00000008988	-0.156488	9.09923	0.0282457	0.0629898
CSDE1	protein_coding	ENSG00000009307	0.0607709	10.0499	0.37096	0.50648
UBE3C	protein_coding	ENSG00000009335	0.210913	5.76686	0.0021917	0.00692256
REV3L	protein_coding	ENSG00000009413	0.406029	5.25113	1.92487e-07	1.35727e-06
TENM1	protein_coding	ENSG00000009694	0.184293	-0.531615	0.400918	0.53751
PAX7	protein_coding	ENSG00000009709	-0.0719399	2.81771	0.484492	0.61821
MASP2	protein_coding	ENSG00000009724	0.617879	-2.89608	0.496145	0.628948
IYD	protein_coding	ENSG00000009765	-0.585123	-3.34163	0.260433	0.386462
FAM76A	protein_coding	ENSG00000009780	-0.0318602	2.23102	0.759798	0.849285
TRAF3IP3	protein_coding	ENSG00000009790	0.490775	-3.76599	0.360489	0.495751
POMT2	protein_coding	ENSG00000009830	0.278535	6.05849	2.36712e-05	0.000115583
VTA1	protein_coding	ENSG00000009844	0.24197	6.66543	0.000576938	0.00209635
MLXIPL	protein_coding	ENSG00000009950	0.124395	-2.04446	0.719437	0.817256
BAZ1B	protein_coding	ENSG00000009954	0.279798	7.97967	2.29938e-05	0.000112617
RANBP9	protein_coding	ENSG00000010017	-0.0849323	5.46498	0.208653	0.325845
ETV7	protein_coding	ENSG00000010030	-0.589991	0.713713	3.82407e-05	0.000179447
SPRTN	protein_coding	ENSG00000010072	0.458075	4.87826	1.08415e-10	1.2101e-09
METTL13	protein_coding	ENSG00000010165	0.084045	6.02527	0.201974	0.317535
DYRK4	protein_coding	ENSG00000010219	0.170553	3.96655	0.0350135	0.0754913
ZNF207	protein_coding	ENSG00000010244	0.637858	7.37053	7.64203e-24	2.93111e-22
UQCRC1	protein_coding	ENSG00000010256	-0.267738	7.15398	2.85206e-05	0.000137231
STARD3NL	protein_coding	ENSG00000010270	-0.168331	6.0821	0.0112708	0.0288441
CD9	protein_coding	ENSG00000010278	0.118275	7.38984	0.0820463	0.153602
NCAPD2	protein_coding	ENSG00000010292	0.473408	8.66313	3.7784e-12	5.0787e-11
IFFO1	protein_coding	ENSG00000010295	-0.0199026	2.1225	0.826493	0.899053
GIPR	protein_coding	ENSG00000010310	-0.662901	0.225825	0.00063016	0.0022726
PHF7	protein_coding	ENSG00000010318	-0.2399	3.15796	0.0103947	0.0268905
SEMA3G	protein_coding	ENSG00000010319	-0.384203	3.34781	2.83931e-05	0.000136699
NISCH	protein_coding	ENSG00000010322	0.22441	6.26182	0.000682569	0.00244186
FUZ	protein_coding	ENSG00000010361	-0.330825	2.73921	0.00143574	0.00476607
SLC6A13	protein_coding	ENSG00000010379	-0.370213	-0.797951	0.137798	0.233672
IDS	protein_coding	ENSG00000010404	0.203362	6.86268	0.00161873	0.0052904
ZNF200	protein_coding	ENSG00000010539	0.01715	4.64488	0.829432	0.901044
CD4	protein_coding	ENSG00000010610	0.511399	-3.13694	0.337925	0.471752
LRRC23	protein_coding	ENSG00000010626	-0.0416488	3.72583	0.627696	0.744646
BTK	protein_coding	ENSG00000010671	0.424722	-2.64271	0.576917	0.701367
SCMH1	protein_coding	ENSG00000010803	0.167097	5.18525	0.0184991	0.0440784
FYN	protein_coding	ENSG00000010810	-0.00758496	4.82668	0.909255	0.957093
HIVEP2	protein_coding	ENSG00000010818	-0.189029	5.87888	0.0084633	0.0225155
ELOA	protein_coding	ENSG00000011007	0.0570791	7.29971	0.383638	0.51984
LYPLA2	protein_coding	ENSG00000011009	-0.0644701	5.5781	0.35725	0.492366
CLCN6	protein_coding	ENSG00000011021	0.722972	5.34485	2.38842e-25	1.02185e-23
MRC2	protein_coding	ENSG00000011028	-0.0848735	8.97056	0.199678	0.314747
TSPAN9	protein_coding	ENSG00000011105	-0.153691	5.60752	0.0260012	0.0586854
BTBD7	protein_coding	ENSG00000011114	0.437707	5.50461	2.02584e-10	2.18524e-09
APBA3	protein_coding	ENSG00000011132	0.0364443	3.54699	0.661434	0.772294
MKS1	protein_coding	ENSG00000011143	0.07335	4.38702	0.351702	0.486641
ABHD5	protein_coding	ENSG00000011198	-0.452923	4.67815	3.18291e-09	2.91508e-08
ANOS1	protein_coding	ENSG00000011201	-0.00380283	6.33957	0.958409	0.992743
AKAP8L	protein_coding	ENSG00000011243	0.812065	5.70055	7.93829e-35	6.2081e-33
MBTD1	protein_coding	ENSG00000011258	0.142949	4.28751	0.0700926	0.135143
UTP18	protein_coding	ENSG00000011260	0.322602	6.06744	1.80579e-06	1.07797e-05
RNF216	protein_coding	ENSG00000011275	0.149786	7.48774	0.0187645	0.0445959
TTC19	protein_coding	ENSG00000011295	0.0246546	4.32135	0.757678	0.847802
PTBP1	protein_coding	ENSG00000011304	-0.128962	8.77902	0.0420636	0.0881108
DPF1	protein_coding	ENSG00000011332	-0.392811	2.86281	0.000166627	0.000685372
SYT7	protein_coding	ENSG00000011347	0.0294322	2.56206	0.760161	0.849521
LARS2	protein_coding	ENSG00000011376	0.705135	5.38989	5.47535e-24	2.13751e-22
PIK3C2A	protein_coding	ENSG00000011405	0.243525	7.05044	0.000176735	0.000723367
PLAUR	protein_coding	ENSG00000011422	-0.549556	7.14705	3.49266e-15	6.41218e-14
ANLN	protein_coding	ENSG00000011426	0.740036	9.29964	1.60525e-26	7.4072e-25
WIZ	protein_coding	ENSG00000011451	0.288929	5.70672	1.98612e-05	9.84152e-05
RABGAP1	protein_coding	ENSG00000011454	0.60584	5.2677	2.60848e-17	5.99527e-16
DCN	protein_coding	ENSG00000011465	-0.206241	-4.1319	0.820422	0.894469
QPCTL	protein_coding	ENSG00000011478	0.118405	4.52429	0.118298	0.206778
PPP5C	protein_coding	ENSG00000011485	0.121941	6.82916	0.0568819	0.113514
CEP68	protein_coding	ENSG00000011523	-0.519396	4.3686	2.60016e-12	3.5565e-11
MAP4K3	protein_coding	ENSG00000011566	0.426179	5.64715	4.40771e-10	4.52937e-09
TMEM159	protein_coding	ENSG00000011638	0.248867	2.9614	0.0101913	0.0264267
GABRA3	protein_coding	ENSG00000011677	0.0591234	4.27767	0.454674	0.5902
BRCA1	protein_coding	ENSG00000012048	-0.0159837	6.47424	0.804802	0.882914
ERCC1	protein_coding	ENSG00000012061	-0.285409	6.70209	1.0694e-05	5.56221e-05
CD22	protein_coding	ENSG00000012124	0.327628	0.331635	0.060767	0.119749
SEMA3B	protein_coding	ENSG00000012171	-0.212519	4.63985	0.00370777	0.0109919
MBTPS2	protein_coding	ENSG00000012174	-0.0886581	4.27418	0.229598	0.350975
PRICKLE3	protein_coding	ENSG00000012211	0.0548778	4.16759	0.488183	0.62184
LTF	protein_coding	ENSG00000012223	-0.185157	0.0117808	0.320441	0.453094
EXTL3	protein_coding	ENSG00000012232	0.0931828	7.14473	0.145715	0.244725
NR1H4	protein_coding	ENSG00000012504	-0.0903492	-3.55577	0.914955	0.960787
ELOVL5	protein_coding	ENSG00000012660	0.282079	8.35549	4.6724e-05	0.00021585
ALOX5	protein_coding	ENSG00000012779	-0.735647	4.42731	1.06826e-21	3.62411e-20
CALCOCO1	protein_coding	ENSG00000012822	0.115354	5.11357	0.0869105	0.161119
UBR7	protein_coding	ENSG00000012963	-0.656316	5.31764	3.13369e-19	8.60675e-18
MAP4K5	protein_coding	ENSG00000012983	0.214628	6.73391	0.00140278	0.00466504
EHD3	protein_coding	ENSG00000013016	0.0419955	4.65703	0.568647	0.693905
PSMC4	protein_coding	ENSG00000013275	-0.0719833	6.64313	0.258702	0.38439
MAN2B2	protein_coding	ENSG00000013288	-0.00362959	5.48089	0.963255	0.996775
CLDN11	protein_coding	ENSG00000013297	0.643065	-1.82931	0.0665691	0.129373
SLC25A39	protein_coding	ENSG00000013306	-0.104774	7.62909	0.111835	0.197802
MVP	protein_coding	ENSG00000013364	0.0199083	6.48634	0.763252	0.85192
NUB1	protein_coding	ENSG00000013374	0.214617	4.75147	0.00392805	0.0115592
PGM3	protein_coding	ENSG00000013375	-0.382509	5.20427	1.0283e-07	7.57918e-07
RWDD2A	protein_coding	ENSG00000013392	-0.619547	1.55312	2.52573e-06	1.46243e-05
CLK1	protein_coding	ENSG00000013441	0.495898	5.73226	9.29594e-13	1.33043e-11
POLR3B	protein_coding	ENSG00000013503	0.704562	4.51394	5.15959e-20	1.54001e-18
ANGEL1	protein_coding	ENSG00000013523	-0.0236496	4.23739	0.762758	0.851488
RNF14	protein_coding	ENSG00000013561	0.188144	4.71201	0.00956221	0.0250387
DNASE1L1	protein_coding	ENSG00000013563	-0.100671	5.01925	0.151267	0.252341
DDX11	protein_coding	ENSG00000013573	0.241352	6.19965	0.0002573	0.001017
HEBP1	protein_coding	ENSG00000013583	-0.253686	4.46701	0.00130755	0.00437916
GPRC5A	protein_coding	ENSG00000013588	-0.289281	7.36126	5.28102e-06	2.89532e-05
MAMLD1	protein_coding	ENSG00000013619	-0.453345	4.55973	3.18116e-08	2.53305e-07
TACC3	protein_coding	ENSG00000013810	0.800718	7.31776	1.23981e-34	9.42058e-33
UFL1	protein_coding	ENSG00000014123	-0.306453	5.14745	9.21602e-06	4.84475e-05
POLA2	protein_coding	ENSG00000014138	-0.368233	2.05988	0.000975634	0.00336629
ZC3H3	protein_coding	ENSG00000014164	0.43637	5.53891	4.20573e-09	3.78704e-08
CAPN1	protein_coding	ENSG00000014216	-0.06072	6.24286	0.359188	0.494294
MDH1	protein_coding	ENSG00000014641	-0.229447	6.65549	0.000364211	0.00139073
SLC30A9	protein_coding	ENSG00000014824	-0.218765	6.2765	0.00119493	0.00404074
MTMR11	protein_coding	ENSG00000014914	-0.0776661	3.9699	0.334866	0.468493
COX15	protein_coding	ENSG00000014919	0.211734	3.92059	0.00686778	0.0188324
CCDC88C	protein_coding	ENSG00000015133	-0.273197	-0.433151	0.15382	0.255945
YAF2	protein_coding	ENSG00000015153	-0.0726362	4.14287	0.33885	0.472604
ZMYND11	protein_coding	ENSG00000015171	0.179196	5.28371	0.015525	0.0379029
WAS	protein_coding	ENSG00000015285	0.645749	-2.55206	0.0950901	0.173663
BID	protein_coding	ENSG00000015475	-0.395314	4.9314	1.39757e-08	1.17376e-07
MATR3	protein_coding	ENSG00000015479	0.460862	1.01327	0.0011012	0.00375193
NPC1L1	protein_coding	ENSG00000015520	0.568554	-2.82899	0.205337	0.321793
XYLT2	protein_coding	ENSG00000015532	0.383232	5.64318	6.21352e-09	5.48424e-08
RGPD5	protein_coding	ENSG00000015568	0.186635	2.18653	0.0880734	0.162911
STMN4	protein_coding	ENSG00000015592	0.707438	-3.07984	0.0934955	0.171283
NUDCD3	protein_coding	ENSG00000015676	0.178627	6.5618	0.00518823	0.0147526
ISL1	protein_coding	ENSG00000016082	-1.17304	-3.65301	0.272664	0.400858
CHDH	protein_coding	ENSG00000016391	-0.611954	1.22358	1.49805e-05	7.59494e-05
IL20RA	protein_coding	ENSG00000016402	-0.875557	-1.70497	0.0095354	0.0249814
GLT8D1	protein_coding	ENSG00000016864	0.0204992	4.88404	0.770974	0.857599
ATP2C1	protein_coding	ENSG00000017260	0.0821017	6.66266	0.214095	0.332361
IGF1	protein_coding	ENSG00000017427	-0.446652	-2.5817	0.275221	0.40368
SLC38A5	protein_coding	ENSG00000017483	0.248126	0.115614	0.164481	0.270152
RALBP1	protein_coding	ENSG00000017797	0.125671	7.56297	0.062685	0.122901
RUFY3	protein_coding	ENSG00000018189	0.270136	5.64961	4.08969e-05	0.000190686
CNTN1	protein_coding	ENSG00000018236	0.535907	4.03481	1.78451e-10	1.93706e-09
SLC11A1	protein_coding	ENSG00000018280	0.048208	-2.62813	1	1
WWTR1	protein_coding	ENSG00000018408	-0.547925	6.01185	9.19173e-16	1.80588e-14
AGPS	protein_coding	ENSG00000018510	0.116466	7.43885	0.0749909	0.142599
CXorf56	protein_coding	ENSG00000018610	0.00269944	3.87713	0.990549	1
ATP1A2	protein_coding	ENSG00000018625	-1.08857	1.33371	1.31001e-13	2.06507e-12
TTC27	protein_coding	ENSG00000018699	0.167976	5.11253	0.0217936	0.0506067
ZNF582	protein_coding	ENSG00000018869	0.278974	1.88499	0.0260322	0.0587445
PHLDB1	protein_coding	ENSG00000019144	-0.0835584	6.98021	0.185487	0.297161
MARCO	protein_coding	ENSG00000019169	0.62725	4.08164	4.37645e-13	6.49511e-12
CYP24A1	protein_coding	ENSG00000019186	-0.608376	5.9735	2.41138e-19	6.72256e-18
PRDM11	protein_coding	ENSG00000019485	-0.0356932	4.26309	0.655114	0.767011
SYT13	protein_coding	ENSG00000019505	0.364067	0.28468	0.0239248	0.0547999
SNAI2	protein_coding	ENSG00000019549	-0.136444	4.79819	0.0588492	0.116686
CD74	protein_coding	ENSG00000019582	0.953607	-2.73229	0.0120743	0.0305948
HGF	protein_coding	ENSG00000019991	-1.24349	-3.3084	0.0579465	0.115199
ZRANB1	protein_coding	ENSG00000019995	0.602366	5.7094	1.81693e-18	4.64098e-17
NCDN	protein_coding	ENSG00000020129	-0.137011	5.37426	0.0517081	0.104875
ADGRA2	protein_coding	ENSG00000020181	-0.567322	4.42102	1.12844e-12	1.60075e-11
ZFP64	protein_coding	ENSG00000020256	0.259821	5.45195	0.000117284	0.000497978
MNAT1	protein_coding	ENSG00000020426	0.210501	5.33564	0.00645084	0.0178415
SAMD4A	protein_coding	ENSG00000020577	0.295362	7.11042	7.55456e-06	4.03295e-05
RUNX3	protein_coding	ENSG00000020633	-0.816951	3.97168	1.08853e-24	4.47432e-23
MRE11	protein_coding	ENSG00000020922	-0.0478014	5.60741	0.476049	0.610152
PLEKHB1	protein_coding	ENSG00000021300	-0.143335	0.926835	0.379281	0.515387
SERPINB1	protein_coding	ENSG00000021355	-0.218458	3.95796	0.00603146	0.0168206
SLC7A9	protein_coding	ENSG00000021488	0.193916	-2.19627	0.581452	0.70567
SPAST	protein_coding	ENSG00000021574	0.279299	5.20672	5.87172e-05	0.000266451
NRXN3	protein_coding	ENSG00000021645	0.367958	4.62206	1.54365e-07	1.10693e-06
OSBPL5	protein_coding	ENSG00000021762	0.0801249	4.52371	0.278925	0.407896
AQR	protein_coding	ENSG00000021776	0.451331	5.91656	1.81323e-11	2.23632e-10
CPS1	protein_coding	ENSG00000021826	0.314489	4.72836	2.71749e-05	0.000131332
FHL1	protein_coding	ENSG00000022267	-0.193147	6.3836	0.00310034	0.00939818
RTF2	protein_coding	ENSG00000022277	0.163677	6.39692	0.026258	0.0591597
GABRA1	protein_coding	ENSG00000022355	0.353646	1.00246	0.0362132	0.0777283
NLRP2	protein_coding	ENSG00000022556	0.167082	3.16058	0.0658217	0.128148
SLC45A4	protein_coding	ENSG00000022567	0.051107	3.48598	0.538819	0.667585
RNF10	protein_coding	ENSG00000022840	0.0786358	6.90845	0.215912	0.334707
ZNF839	protein_coding	ENSG00000022976	-0.413184	2.52576	3.67309e-05	0.000172969
ZDHHC6	protein_coding	ENSG00000023041	0.0837145	5.9635	0.205192	0.321608
GRAMD1B	protein_coding	ENSG00000023171	-0.294909	5.09361	2.01099e-05	9.9545e-05
RNH1	protein_coding	ENSG00000023191	-0.117692	6.2934	0.0731547	0.139847
NDUFS1	protein_coding	ENSG00000023228	-0.0497676	6.63569	0.448557	0.58422
RB1CC1	protein_coding	ENSG00000023287	0.388661	6.6893	4.42107e-08	3.43961e-07
ERP44	protein_coding	ENSG00000023318	-0.0256901	6.33207	0.707632	0.808689
ALAS1	protein_coding	ENSG00000023330	0.0491397	5.85489	0.474359	0.608472
BIRC3	protein_coding	ENSG00000023445	-3.78955	5.58688	3.99226e-47	5.86351e-45
AKAP11	protein_coding	ENSG00000023516	-0.069618	6.14467	0.296261	0.427615
GLRX2	protein_coding	ENSG00000023572	-0.543357	2.20331	1.68728e-06	1.01098e-05
SNAPC1	protein_coding	ENSG00000023608	0.143393	7.0084	0.0831547	0.155375
DERA	protein_coding	ENSG00000023697	-0.572647	4.65567	3.67763e-15	6.72612e-14
STRAP	protein_coding	ENSG00000023734	0.232884	7.8815	0.000948482	0.0032839
ABCC2	protein_coding	ENSG00000023839	0.20402	1.09481	0.183466	0.294571
DEF6	protein_coding	ENSG00000023892	0.49281	1.1936	0.00066962	0.00240095
PLEKHO1	protein_coding	ENSG00000023902	-0.360866	5.16463	1.07383e-07	7.89301e-07
GCLM	protein_coding	ENSG00000023909	-0.293238	5.3837	1.82207e-05	9.09979e-05
UBR2	protein_coding	ENSG00000024048	0.336743	5.53278	2.72665e-06	1.57046e-05
EHD2	protein_coding	ENSG00000024422	0.0285623	4.87149	0.694486	0.799356
DEPDC1	protein_coding	ENSG00000024526	1.59206	6.44127	8.40336e-122	1.06533e-118
CCDC28A	protein_coding	ENSG00000024862	-0.155925	3.15458	0.103573	0.186009
RRAGD	protein_coding	ENSG00000025039	-1.09181	3.87874	4.35133e-40	4.42239e-38
HSF2	protein_coding	ENSG00000025156	0.280993	3.9397	0.000801998	0.00282919
PHF20	protein_coding	ENSG00000025293	0.151655	5.03357	0.0347621	0.0750619
HSD17B6	protein_coding	ENSG00000025423	0.0434435	0.666101	0.761867	0.850966
NR1H3	protein_coding	ENSG00000025434	-0.0175479	2.78317	0.845978	0.912584
TYMP	protein_coding	ENSG00000025708	-0.219977	-0.996414	0.437136	0.573334
NCAPH2	protein_coding	ENSG00000025770	-0.404041	6.19792	7.40921e-09	6.44979e-08
TOMM34	protein_coding	ENSG00000025772	0.187629	7.23741	0.00401705	0.0117701
SEC63	protein_coding	ENSG00000025796	0.349236	6.97123	1.58616e-07	1.13528e-06
KPNA6	protein_coding	ENSG00000025800	0.238878	6.43553	0.000232549	0.00092985
VIM	protein_coding	ENSG00000026025	0.255254	11.2616	8.99021e-05	0.000392865
RTEL1-TNFRSF6B	protein_coding	ENSG00000026036	0.753042	0.252899	2.84675e-05	0.000137003
FAS	protein_coding	ENSG00000026103	0.222529	5.16556	0.00111575	0.003797
RNASET2	protein_coding	ENSG00000026297	-0.0881607	2.92161	0.448307	0.58417
CD44	protein_coding	ENSG00000026508	0.324592	8.60747	2.69944e-07	1.8551e-06
KCNG1	protein_coding	ENSG00000026559	-0.544644	5.90266	2.00682e-16	4.24019e-15
AGPAT4	protein_coding	ENSG00000026652	0.180661	4.26756	0.0197644	0.0466319
SLAMF7	protein_coding	ENSG00000026751	-0.0173726	3.84225	0.828828	0.900617
BTN3A1	protein_coding	ENSG00000026950	0.120336	1.99396	0.272526	0.400715
MIPEP	protein_coding	ENSG00000027001	-0.201396	3.46073	0.0200646	0.0472292
PRKCH	protein_coding	ENSG00000027075	-0.346579	5.11484	1.54728e-05	7.82616e-05
INSRR	protein_coding	ENSG00000027644	-0.479458	-0.893045	0.0595824	0.117965
IFNGR1	protein_coding	ENSG00000027697	-0.0592295	4.86052	0.413034	0.549563
B4GALT7	protein_coding	ENSG00000027847	-0.000879855	4.1125	1	1
SH2D2A	protein_coding	ENSG00000027869	-0.749329	3.09175	1.94078e-16	4.10674e-15
VRK2	protein_coding	ENSG00000028116	0.0777285	6.07999	0.252667	0.377543
TNFRSF1B	protein_coding	ENSG00000028137	-1.71326	-1.2793	1.71217e-09	1.62558e-08
VEZT	protein_coding	ENSG00000028203	0.215073	5.09698	0.00240082	0.00749949
POU2F2	protein_coding	ENSG00000028277	-1.94045	4.35295	1.12184e-126	1.80146e-123
BRD9	protein_coding	ENSG00000028310	0.386609	5.86177	2.28088e-09	2.14022e-08
SNX1	protein_coding	ENSG00000028528	0.0436252	7.34137	0.490542	0.623914
TBPL1	protein_coding	ENSG00000028839	0.345379	4.67694	2.13093e-06	1.25556e-05
ARNTL2	protein_coding	ENSG00000029153	-0.593429	5.86568	3.62885e-19	9.93275e-18
BCLAF1	protein_coding	ENSG00000029363	0.544894	8.2726	1.07965e-15	2.10572e-14
SLC39A9	protein_coding	ENSG00000029364	0.122414	7.00193	0.0532234	0.107414
ANK1	protein_coding	ENSG00000029534	-0.569943	1.93025	3.15974e-06	1.79714e-05
TFB1M	protein_coding	ENSG00000029639	0.1334	3.28608	0.131481	0.224928
RABEP1	protein_coding	ENSG00000029725	0.0572618	5.86812	0.425294	0.561719
HMGB3	protein_coding	ENSG00000029993	0.418878	6.18817	2.35499e-09	2.20804e-08
NUP160	protein_coding	ENSG00000030066	-0.020382	6.81762	0.753079	0.843989
BAK1	protein_coding	ENSG00000030110	-0.101769	5.62089	0.15109	0.252135
IKZF2	protein_coding	ENSG00000030419	-0.527222	2.9963	1.0024e-07	7.40412e-07
GRN	protein_coding	ENSG00000030582	-0.153283	7.214	0.0246687	0.0562311
FAM13B	protein_coding	ENSG00000031003	0.379688	5.59786	4.45215e-08	3.46267e-07
ARHGAP31	protein_coding	ENSG00000031081	0.0209235	6.08794	0.769202	0.856301
CENPQ	protein_coding	ENSG00000031691	-0.456718	3.76169	5.44663e-07	3.54767e-06
SARS	protein_coding	ENSG00000031698	-0.186336	8.0228	0.00524935	0.014907
RANBP3	protein_coding	ENSG00000031823	0.215443	5.63843	0.00102846	0.00353237
ARID4A	protein_coding	ENSG00000032219	0.271986	5.12854	0.000542503	0.0019838
EIPR1	protein_coding	ENSG00000032389	-0.120564	3.4491	0.196452	0.310678
PNPLA6	protein_coding	ENSG00000032444	-0.283886	5.46939	0.000118049	0.000500517
IFT88	protein_coding	ENSG00000032742	-0.0454092	2.84958	0.6538	0.766032
ALG1	protein_coding	ENSG00000033011	0.162509	4.6033	0.0226788	0.0523191
ZCCHC8	protein_coding	ENSG00000033030	0.706857	5.35276	8.58843e-26	3.80975e-24
ABCF2	protein_coding	ENSG00000033050	0.220884	3.07729	0.0249617	0.0568238
CHPF2	protein_coding	ENSG00000033100	-0.128755	4.01807	0.104825	0.187727
LRRC7	protein_coding	ENSG00000033122	-0.937033	-0.186323	5.37224e-05	0.000245496
FUT8	protein_coding	ENSG00000033170	0.0289886	6.26716	0.655643	0.767407
UBA6	protein_coding	ENSG00000033178	0.392787	6.82798	1.54888e-09	1.48341e-08
GAB2	protein_coding	ENSG00000033327	-0.0410244	4.5145	0.612996	0.732572
ATP6V0A1	protein_coding	ENSG00000033627	-0.403488	-0.140471	0.0629387	0.123292
PIAS1	protein_coding	ENSG00000033800	0.736627	5.62597	3.87634e-28	1.95743e-26
SLC4A7	protein_coding	ENSG00000033867	0.175884	5.88013	0.0083431	0.0222424
APBA2	protein_coding	ENSG00000034053	-0.211232	4.63779	0.00387061	0.011417
MAP2K3	protein_coding	ENSG00000034152	-1.20359	6.92867	1.8274e-62	4.68261e-60
EFCAB1	protein_coding	ENSG00000034239	-0.446593	-1.90237	0.197069	0.311409
TMSB10	protein_coding	ENSG00000034510	-0.154862	9.31011	0.0269764	0.060563
ASTE1	protein_coding	ENSG00000034533	-0.0869207	2.79705	0.368246	0.503774
RNF19A	protein_coding	ENSG00000034677	0.088057	6.13183	0.182018	0.292773
PEX3	protein_coding	ENSG00000034693	-0.078572	4.30472	0.324895	0.458048
GABARAPL2	protein_coding	ENSG00000034713	-0.14586	5.4979	0.0383406	0.0815339
SH3YL1	protein_coding	ENSG00000035115	0.276552	2.21966	0.0136462	0.0339633
FAM136A	protein_coding	ENSG00000035141	0.0360464	7.04033	0.604315	0.725159
VCL	protein_coding	ENSG00000035403	-0.212133	8.25651	0.000945518	0.00327599
DEPDC1B	protein_coding	ENSG00000035499	0.502154	5.57948	5.12817e-13	7.52268e-12
DAPK2	protein_coding	ENSG00000035664	-0.181237	1.61345	0.186388	0.298148
NSMAF	protein_coding	ENSG00000035681	-0.195028	6.00168	0.00403187	0.0118088
ADSS	protein_coding	ENSG00000035687	0.112346	5.44453	0.11406	0.200757
TIMP2	protein_coding	ENSG00000035862	0.016727	7.92251	0.799512	0.878672
RFC1	protein_coding	ENSG00000035928	0.28716	7.5343	3.73544e-05	0.000175631
TBC1D23	protein_coding	ENSG00000036054	0.092559	5.88452	0.180001	0.29042
CUL3	protein_coding	ENSG00000036257	0.651539	7.06685	8.96727e-23	3.22862e-21
MYOM2	protein_coding	ENSG00000036448	-0.481033	1.77778	4.38665e-05	0.000203429
CYP46A1	protein_coding	ENSG00000036530	-0.130352	-1.71369	0.894776	0.947199
AC118549.1	protein_coding	ENSG00000036549	0.541671	6.19526	5.39656e-15	9.70776e-14
USP2	protein_coding	ENSG00000036672	-1.76377	-0.841947	2.07876e-09	1.95973e-08
TUBG2	protein_coding	ENSG00000037042	-0.0613997	2.03306	0.589812	0.712979
RPL26L1	protein_coding	ENSG00000037241	-0.426944	4.93075	6.92005e-07	4.41545e-06
FLT4	protein_coding	ENSG00000037280	-0.685233	4.3258	5.21061e-19	1.40232e-17
NSUN2	protein_coding	ENSG00000037474	0.409512	7.93566	2.96681e-10	3.1165e-09
FBXO42	protein_coding	ENSG00000037637	-0.0610159	3.93608	0.451953	0.587747
MFAP3	protein_coding	ENSG00000037749	0.239727	5.88467	0.000281493	0.00110177
MRI1	protein_coding	ENSG00000037757	-0.142858	4.03435	0.0695761	0.134367
METTL1	protein_coding	ENSG00000037897	0.316125	3.91137	0.000121005	0.00051161
HOXC8	protein_coding	ENSG00000037965	0.0269727	3.90411	0.767509	0.855246
AGA	protein_coding	ENSG00000038002	-0.0976406	3.5911	0.240274	0.363239
PI4K2B	protein_coding	ENSG00000038210	-0.583034	2.3658	1.44555e-07	1.04123e-06
BOD1L1	protein_coding	ENSG00000038219	0.480268	6.6629	9.51104e-09	8.17312e-08
MAT2B	protein_coding	ENSG00000038274	-0.0491819	5.45614	0.457961	0.593218
TLL1	protein_coding	ENSG00000038295	0.0439288	-0.0342589	0.828005	0.900097
EDC4	protein_coding	ENSG00000038358	0.190767	6.15973	0.00359639	0.0107078
TRIO	protein_coding	ENSG00000038382	0.361343	8.49665	4.742e-08	3.66444e-07
VCAN	protein_coding	ENSG00000038427	0.783932	-0.959072	0.000470272	0.0017486
CLEC16A	protein_coding	ENSG00000038532	0.144962	6.1454	0.0295275	0.0654064
MSR1	protein_coding	ENSG00000038945	0.0879601	-2.64257	0.799698	0.87877
CDH1	protein_coding	ENSG00000039068	-0.803538	2.5409	1.64262e-15	3.14014e-14
MTREX	protein_coding	ENSG00000039123	0.405263	6.9263	4.46444e-09	4.00354e-08
DNAH5	protein_coding	ENSG00000039139	0.052292	1.59474	0.764472	0.852729
ZFYVE16	protein_coding	ENSG00000039319	0.250977	5.76633	0.000259185	0.00102361
RIPOR1	protein_coding	ENSG00000039523	0.158698	6.56551	0.0153823	0.0376118
RAI14	protein_coding	ENSG00000039560	0.0573963	7.61271	0.39915	0.535646
SOX30	protein_coding	ENSG00000039600	-0.210085	-3.80123	0.859023	0.921968
PNKP	protein_coding	ENSG00000039650	0.216028	5.08538	0.00320634	0.00967444
BEST2	protein_coding	ENSG00000039987	-0.427969	-1.97014	0.313953	0.446307
PHLPP2	protein_coding	ENSG00000040199	0.0937482	6.18644	0.15468	0.257039
SPDL1	protein_coding	ENSG00000040275	0.808012	6.21676	1.3294e-33	9.47373e-32
STAU2	protein_coding	ENSG00000040341	-0.0921507	5.72133	0.225557	0.346338
PQLC2	protein_coding	ENSG00000040487	-0.298689	3.94647	0.000290785	0.00113501
CTNS	protein_coding	ENSG00000040531	0.477028	3.40718	6.12318e-08	4.67329e-07
RTN4R	protein_coding	ENSG00000040608	-0.6381	3.87565	5.10081e-12	6.75073e-11
PHF23	protein_coding	ENSG00000040633	0.226207	5.66507	0.000639809	0.00230429
CDH10	protein_coding	ENSG00000040731	0.819646	0.187035	0.0602911	0.119045
INPP4A	protein_coding	ENSG00000040933	-0.0480509	5.71068	0.467064	0.601742
RAB27B	protein_coding	ENSG00000041353	0.00585417	1.10145	1	1
PSMA4	protein_coding	ENSG00000041357	0.133185	7.58389	0.0477034	0.0981093
MYO16	protein_coding	ENSG00000041515	0.548116	1.86192	1.31112e-05	6.72509e-05
LSG1	protein_coding	ENSG00000041802	0.316272	6.79371	6.20759e-07	4.00482e-06
PARP3	protein_coding	ENSG00000041880	0.053452	4.34459	0.489404	0.623092
TNC	protein_coding	ENSG00000041982	0.0904888	8.97666	0.173187	0.281443
THAP3	protein_coding	ENSG00000041988	0.810427	2.90304	3.98418e-16	8.22338e-15
RIPOR3	protein_coding	ENSG00000042062	0.323037	-3.57015	0.529206	0.659202
TDP1	protein_coding	ENSG00000042088	0.23254	4.35641	0.00305345	0.00927353
AIFM2	protein_coding	ENSG00000042286	-0.000758879	5.73212	0.980924	1
SPATA7	protein_coding	ENSG00000042317	0.20903	2.45606	0.0599308	0.118502
MED17	protein_coding	ENSG00000042429	0.19204	2.30763	0.0911253	0.167586
RETSAT	protein_coding	ENSG00000042445	0.210909	5.02715	0.00233468	0.00732231
CAPG	protein_coding	ENSG00000042493	-0.226235	4.71049	0.0020459	0.00650331
AP2S1	protein_coding	ENSG00000042753	-0.285652	6.32542	1.14315e-05	5.91261e-05
USH2A	protein_coding	ENSG00000042781	-0.240813	-3.01009	0.693426	0.798516
TG	protein_coding	ENSG00000042832	1.25963	-1.37464	7.51261e-07	4.76828e-06
ADAM28	protein_coding	ENSG00000042980	0.551507	-0.0735512	0.00275517	0.00848315
BARX2	protein_coding	ENSG00000043039	-0.588225	-1.03812	0.0660933	0.128614
DCUN1D1	protein_coding	ENSG00000043093	0.037038	5.4339	0.596053	0.718682
JADE2	protein_coding	ENSG00000043143	0.448502	6.00198	8.50628e-12	1.09802e-10
LCP2	protein_coding	ENSG00000043462	0.800118	-3.50428	0.133519	0.227767
TRIT1	protein_coding	ENSG00000043514	0.189957	4.82673	0.0126367	0.0318222
ADRB1	protein_coding	ENSG00000043591	-3.10554	-3.78851	0.000297	0.00115608
CUL7	protein_coding	ENSG00000044090	0.395642	5.35038	3.63028e-09	3.29227e-08
CTNNA1	protein_coding	ENSG00000044115	0.0850248	8.42564	0.193739	0.307114
PHKA2	protein_coding	ENSG00000044446	0.08432	4.45347	0.241192	0.364352
CNTLN	protein_coding	ENSG00000044459	-0.203119	3.14633	0.0280342	0.062582
EPHA3	protein_coding	ENSG00000044524	0.262106	-2.35966	0.511599	0.642667
HSPA5	protein_coding	ENSG00000044574	0.1287	9.9181	0.0541969	0.109032
DSG2	protein_coding	ENSG00000046604	-0.452096	6.77452	3.25269e-12	4.39661e-11
GEMIN8	protein_coding	ENSG00000046647	0.769038	1.00551	5.26139e-07	3.43606e-06
OFD1	protein_coding	ENSG00000046651	0.134482	4.08966	0.0982523	0.178236
GPM6B	protein_coding	ENSG00000046653	-0.379168	0.410627	0.0353353	0.0760807
MAGEC2	protein_coding	ENSG00000046774	0.212249	-2.85621	0.6148	0.73409
PREX2	protein_coding	ENSG00000046889	-0.174241	0.313221	0.298651	0.430188
WDR37	protein_coding	ENSG00000047056	0.170698	3.00367	0.0639252	0.124981
YTHDC2	protein_coding	ENSG00000047188	0.00825295	5.39525	0.920298	0.964319
CTPS2	protein_coding	ENSG00000047230	-0.431702	2.33257	7.43379e-05	0.000330121
ATP6V1H	protein_coding	ENSG00000047249	0.276778	4.65886	0.000124535	0.000525413
POLR2B	protein_coding	ENSG00000047315	0.386247	7.94921	3.38854e-09	3.09049e-08
FAM214A	protein_coding	ENSG00000047346	0.142514	2.29458	0.247554	0.371817
ARAP2	protein_coding	ENSG00000047365	-0.177942	6.19288	0.0186862	0.0444362
TPR	protein_coding	ENSG00000047410	0.55215	8.03372	3.55369e-16	7.37276e-15
CP	protein_coding	ENSG00000047457	-0.0575077	-2.56499	0.81591	0.890921
KIAA0556	protein_coding	ENSG00000047578	0.23178	5.08943	0.000594841	0.0021575
DTNBP1	protein_coding	ENSG00000047579	-0.226565	3.05306	0.0192835	0.0456746
XK	protein_coding	ENSG00000047597	-0.716489	1.43212	4.81671e-07	3.16562e-06
ANO2	protein_coding	ENSG00000047617	-0.41384	5.59896	4.05887e-10	4.19777e-09
C12orf4	protein_coding	ENSG00000047621	-0.0538974	4.99948	0.447014	0.582831
SCML1	protein_coding	ENSG00000047634	-0.350021	4.75221	3.57742e-06	2.02086e-05
WWC3	protein_coding	ENSG00000047644	-0.51016	2.64141	6.16012e-07	3.97798e-06
ARHGAP6	protein_coding	ENSG00000047648	-0.0381571	0.796204	0.851141	0.916608
FAM184B	protein_coding	ENSG00000047662	2.13857	-2.70381	3.66039e-05	0.000172438
MAP4	protein_coding	ENSG00000047849	0.277941	8.75793	2.9675e-05	0.00014233
GOPC	protein_coding	ENSG00000047932	0.291483	5.65619	4.2253e-05	0.000196439
ROS1	protein_coding	ENSG00000047936	0.95711	3.86956	2.61558e-33	1.82613e-31
USP28	protein_coding	ENSG00000048028	0.215484	5.90125	0.00204333	0.00649651
HDAC9	protein_coding	ENSG00000048052	-1.1147	5.3146	8.77612e-48	1.33791e-45
TSPAN17	protein_coding	ENSG00000048140	-0.168408	6.92365	0.00859141	0.022811
NOP16	protein_coding	ENSG00000048162	0.191024	5.89425	0.00489169	0.0140023
CC2D2A	protein_coding	ENSG00000048342	0.676683	4.2704	5.20403e-18	1.27388e-16
RRM2B	protein_coding	ENSG00000048392	0.115933	7.50715	0.0775834	0.146684
ZNF800	protein_coding	ENSG00000048405	0.154621	4.53067	0.0337877	0.0732007
SNX29	protein_coding	ENSG00000048471	0.19169	3.57808	0.0265851	0.0597858
LMO3	protein_coding	ENSG00000048540	-0.311955	-3.12733	0.714686	0.814008
MRPS10	protein_coding	ENSG00000048544	-0.0336724	5.83843	0.613372	0.732815
RSF1	protein_coding	ENSG00000048649	0.678614	6.58254	2.79445e-22	9.82627e-21
VPS13D	protein_coding	ENSG00000048707	0.461329	5.89566	1.4046e-09	1.35168e-08
CELF2	protein_coding	ENSG00000048740	-0.368216	2.22471	0.00192791	0.00616293
FAM120A	protein_coding	ENSG00000048828	0.1033	7.69632	0.107463	0.191483
R3HDM1	protein_coding	ENSG00000048991	0.281507	6.0736	8.86282e-05	0.000387861
COL9A2	protein_coding	ENSG00000049089	-0.140003	4.52962	0.0644064	0.125783
KITLG	protein_coding	ENSG00000049130	-1.71086	5.25265	1.70475e-94	1.05288e-91
ERCC8	protein_coding	ENSG00000049167	0.101784	3.76395	0.251583	0.376367
ADAMTS6	protein_coding	ENSG00000049192	-0.305369	6.13186	3.02348e-05	0.000144871
H6PD	protein_coding	ENSG00000049239	-0.478711	4.91852	5.82497e-11	6.71321e-10
VAMP3	protein_coding	ENSG00000049245	0.0820733	6.00988	0.210473	0.327985
PER3	protein_coding	ENSG00000049246	0.174548	5.40136	0.0145165	0.0358257
TNFRSF9	protein_coding	ENSG00000049249	-1.46655	4.363	9.43296e-76	3.66471e-73
EPN3	protein_coding	ENSG00000049283	-0.317174	-0.427053	0.202288	0.317816
LTBP1	protein_coding	ENSG00000049323	-0.0907072	7.01609	0.177277	0.286687
RCN1	protein_coding	ENSG00000049449	-0.0650394	7.28393	0.317812	0.450316
ELN	protein_coding	ENSG00000049540	-1.19156	-3.74641	0.11281	0.199074
RFC2	protein_coding	ENSG00000049541	-0.464547	6.07407	1.28043e-11	1.6055e-10
ARID1B	protein_coding	ENSG00000049618	0.462424	6.5366	6.73613e-11	7.70067e-10
CLPTM1L	protein_coding	ENSG00000049656	-0.191728	8.76368	0.00242521	0.00757077
NEDD4L	protein_coding	ENSG00000049759	0.842343	7.27272	1.30627e-38	1.25355e-36
FOXP3	protein_coding	ENSG00000049768	-0.0902111	0.787331	0.547231	0.675092
PPP1R3F	protein_coding	ENSG00000049769	-0.759703	1.53294	3.15071e-09	2.88779e-08
HEXB	protein_coding	ENSG00000049860	-0.185798	5.2957	0.00571721	0.016067
PTCD2	protein_coding	ENSG00000049883	0.15026	4.26038	0.0469291	0.0967864
NEXMIF	protein_coding	ENSG00000050030	-0.704307	0.0698142	0.00283263	0.00869167
JKAMP	protein_coding	ENSG00000050130	0.246846	6.14716	0.000205318	0.00082978
DKK3	protein_coding	ENSG00000050165	-0.164787	7.65893	0.0087452	0.0231631
ARHGEF5	protein_coding	ENSG00000050327	-0.527011	-0.519859	0.0336805	0.0730078
MCUR1	protein_coding	ENSG00000050393	-0.245344	5.15421	0.000352718	0.00135113
LIMA1	protein_coding	ENSG00000050405	-0.397993	7.91592	2.44412e-09	2.28716e-08
LETMD1	protein_coding	ENSG00000050426	0.503652	4.85094	4.11788e-12	5.51166e-11
SLC4A8	protein_coding	ENSG00000050438	0.965408	4.20094	9.09558e-33	6.17142e-31
LAMC3	protein_coding	ENSG00000050555	0.157369	5.81076	0.0232611	0.0534832
PTGER3	protein_coding	ENSG00000050628	-0.963095	-1.53768	0.00665236	0.0183236
TNIP3	protein_coding	ENSG00000050730	-0.273628	-0.363172	0.18924	0.301414
MAPK9	protein_coding	ENSG00000050748	0.125116	6.0312	0.0554235	0.111055
BCAR1	protein_coding	ENSG00000050820	-0.101101	6.70395	0.114019	0.200715
FAM160A2	protein_coding	ENSG00000051009	0.228166	4.54142	0.00190859	0.00611088
HERPUD1	protein_coding	ENSG00000051108	-1.0315	6.70387	6.4308e-57	1.32392e-54
HOMER3	protein_coding	ENSG00000051128	0.248757	4.31174	0.00159668	0.00522946
RAD51	protein_coding	ENSG00000051180	-0.865564	-3.58675	0.266134	0.393275
POLQ	protein_coding	ENSG00000051341	0.3474	6.25189	7.4145e-08	5.58103e-07
PIK3CB	protein_coding	ENSG00000051382	0.362508	4.6447	2.55816e-06	1.47944e-05
CYBA	protein_coding	ENSG00000051523	1.10308	-1.74717	0.00083888	0.00294292
THOC3	protein_coding	ENSG00000051596	-0.145546	5.40065	0.0398002	0.0841158
HEBP2	protein_coding	ENSG00000051620	-0.0944573	5.87096	0.143257	0.241286
MPHOSPH9	protein_coding	ENSG00000051825	0.453695	5.91568	1.82117e-11	2.24496e-10
PLEKHA5	protein_coding	ENSG00000052126	0.679776	5.74636	5.53945e-24	2.15904e-22
PRSS8	protein_coding	ENSG00000052344	0.698439	-0.924403	0.00199117	0.00634744
SIKE1	protein_coding	ENSG00000052723	0.0869843	6.16288	0.177418	0.286848
RRP12	protein_coding	ENSG00000052749	0.124728	6.7664	0.0556709	0.111457
FNIP2	protein_coding	ENSG00000052795	-0.460228	4.15846	2.26212e-08	1.84497e-07
MSMO1	protein_coding	ENSG00000052802	0.272525	6.47579	0.000100332	0.000433177
TTC17	protein_coding	ENSG00000052841	0.6358	5.94625	3.29385e-22	1.14486e-20
ALX4	protein_coding	ENSG00000052850	-0.473058	-0.839029	0.0904208	0.166524
FSTL4	protein_coding	ENSG00000053108	-0.123592	-0.81303	0.714811	0.814106
FOXN3	protein_coding	ENSG00000053254	0.00790664	6.16168	0.911949	0.95855
AKR7A2	protein_coding	ENSG00000053371	-0.371347	5.02047	6.85845e-08	5.19985e-07
MRTO4	protein_coding	ENSG00000053372	0.25146	6.76038	0.000222063	0.000891174
USE1	protein_coding	ENSG00000053501	0.0110145	2.78842	0.920069	0.964181
MCF2L2	protein_coding	ENSG00000053524	-0.069904	1.11775	0.659336	0.770616
LAMA3	protein_coding	ENSG00000053747	0.422346	4.1634	5.0729e-08	3.90386e-07
AP5M1	protein_coding	ENSG00000053770	0.115311	5.7214	0.09818	0.178157
ANAPC4	protein_coding	ENSG00000053900	0.0929812	4.18781	0.226122	0.347006
KCNQ1	protein_coding	ENSG00000053918	-1.15231	-2.85541	0.0683916	0.132445
TRAPPC3	protein_coding	ENSG00000054116	-0.0638031	5.9164	0.348102	0.482523
THRAP3	protein_coding	ENSG00000054118	0.227782	8.38184	0.000642712	0.00231371
PHPT1	protein_coding	ENSG00000054148	-0.241264	5.22515	0.000851663	0.00298342
ARID4B	protein_coding	ENSG00000054267	0.585703	5.8281	6.16562e-17	1.35999e-15
OPN3	protein_coding	ENSG00000054277	0.261548	-0.136459	0.329904	0.463266
SDCCAG8	protein_coding	ENSG00000054282	-0.0407545	3.19009	0.625891	0.743421
PTPRN	protein_coding	ENSG00000054356	-0.170695	8.12195	0.0099131	0.0258109
HHAT	protein_coding	ENSG00000054392	0.216236	5.15867	0.00195919	0.00625544
KIF1B	protein_coding	ENSG00000054523	-0.0607755	6.6228	0.391615	0.528094
FOXC1	protein_coding	ENSG00000054598	-0.799444	4.14017	9.56746e-23	3.42933e-21
TBC1D22A	protein_coding	ENSG00000054611	0.235557	4.92321	0.00090693	0.00315819
SYNE2	protein_coding	ENSG00000054654	-0.37629	6.85267	0.00404273	0.0118363
PLEKHH1	protein_coding	ENSG00000054690	-0.294969	4.40009	7.82422e-05	0.000345992
ATP9A	protein_coding	ENSG00000054793	-1.19997	5.47647	4.38485e-71	1.44682e-68
CBLN4	protein_coding	ENSG00000054803	-0.687371	-0.527953	0.0024301	0.00758505
FAM168A	protein_coding	ENSG00000054965	0.294119	6.10849	9.81515e-06	5.13393e-05
RELT	protein_coding	ENSG00000054967	0.276205	4.65608	0.000322767	0.00124571
GALC	protein_coding	ENSG00000054983	-0.195183	5.39787	0.00374739	0.0110921
NOP58	protein_coding	ENSG00000055044	0.278739	7.79746	4.19823e-05	0.00019536
SZRD1	protein_coding	ENSG00000055070	-0.276673	7.75458	2.44512e-05	0.000119094
KCNH2	protein_coding	ENSG00000055118	-0.843611	2.22447	3.30644e-13	5.0058e-12
CUL1	protein_coding	ENSG00000055130	0.294186	5.32714	3.52293e-05	0.000166713
FAM114A2	protein_coding	ENSG00000055147	-0.02497	4.32869	0.744975	0.838045
CYFIP2	protein_coding	ENSG00000055163	-0.256371	5.86222	0.000141924	0.000592057
TAB2	protein_coding	ENSG00000055208	0.497083	7.25717	4.40476e-14	7.23721e-13
GINM1	protein_coding	ENSG00000055211	-0.320549	5.78525	1.3167e-06	8.04956e-06
EIF2AK2	protein_coding	ENSG00000055332	0.121445	6.84152	0.0618619	0.121598
USP36	protein_coding	ENSG00000055483	0.0368318	7.25979	0.573501	0.698449
KMT2C	protein_coding	ENSG00000055609	0.58534	4.94519	1.87246e-13	2.91168e-12
CCDC85A	protein_coding	ENSG00000055813	-1.03422	2.03679	5.5635e-18	1.35911e-16
PUM2	protein_coding	ENSG00000055917	0.439034	7.23536	2.76375e-11	3.31692e-10
MRPL43	protein_coding	ENSG00000055950	0.139102	5.34669	0.0437105	0.0910302
ITIH4	protein_coding	ENSG00000055955	0.787768	-3.74509	0.236252	0.358644
HPF1	protein_coding	ENSG00000056050	-0.0762346	4.35757	0.333872	0.467393
ZFR	protein_coding	ENSG00000056097	0.429166	8.02768	3.3171e-09	3.02992e-08
ZNF280C	protein_coding	ENSG00000056277	0.0692162	3.19479	0.436743	0.572975
NPFFR2	protein_coding	ENSG00000056291	-0.128692	4.38713	0.0951257	0.173701
PHF21B	protein_coding	ENSG00000056487	0.0744837	3.40188	0.390441	0.526896
TRAF1	protein_coding	ENSG00000056558	-2.79135	3.75293	1.79227e-60	4.1913e-58
RC3H2	protein_coding	ENSG00000056586	0.0152481	5.90639	0.833245	0.903611
IL17RB	protein_coding	ENSG00000056736	-0.957871	1.73245	1.28686e-13	2.03124e-12
TRAF3IP2	protein_coding	ENSG00000056972	-0.0495077	2.7509	0.610506	0.730224
GYG2	protein_coding	ENSG00000056998	-0.235066	2.9062	0.0169287	0.0408416
DCBLD2	protein_coding	ENSG00000057019	0.0327567	9.45978	0.621469	0.74003
SOAT1	protein_coding	ENSG00000057252	0.0493202	6.54048	0.442602	0.578834
PKP2	protein_coding	ENSG00000057294	-0.551721	5.22192	7.06396e-15	1.2613e-13
MSH4	protein_coding	ENSG00000057468	-0.0663084	-1.17882	0.958707	0.992922
GDI2	protein_coding	ENSG00000057608	0.0652485	8.38075	0.328146	0.461416
PRDM1	protein_coding	ENSG00000057657	0.272727	3.00888	0.00868402	0.0230239
ATG5	protein_coding	ENSG00000057663	0.403383	4.83858	7.28485e-08	5.49891e-07
TMCC3	protein_coding	ENSG00000057704	0.26615	0.184032	0.147799	0.24762
PITHD1	protein_coding	ENSG00000057757	0.0323054	5.91714	0.636226	0.751252
MTA3	protein_coding	ENSG00000057935	0.0864629	5.38703	0.197456	0.311898
USP13	protein_coding	ENSG00000058056	0.208819	5.83888	0.00223102	0.00703384
ATP11B	protein_coding	ENSG00000058063	-0.238365	7.11374	0.000236254	0.00094341
LAMC2	protein_coding	ENSG00000058085	0.261228	7.93139	2.62687e-05	0.00012726
CDK14	protein_coding	ENSG00000058091	0.204092	6.25891	0.00256034	0.00795139
SEC61A1	protein_coding	ENSG00000058262	0.0236518	8.76824	0.714105	0.813423
PPP1R12A	protein_coding	ENSG00000058272	0.606966	6.61984	7.72919e-18	1.86733e-16
RASGRF1	protein_coding	ENSG00000058335	0.124303	6.87306	0.0602966	0.119046
CAMK2B	protein_coding	ENSG00000058404	-1.04322	0.798727	3.59792e-11	4.26701e-10
CROCC	protein_coding	ENSG00000058453	0.951052	4.80388	3.45461e-34	2.56825e-32
POLR3E	protein_coding	ENSG00000058600	0.377215	5.94085	4.82897e-09	4.31917e-08
ATP2B4	protein_coding	ENSG00000058668	0.153013	5.97418	0.027833	0.0621789
ZC3H11A	protein_coding	ENSG00000058673	1.20427	-2.26822	0.00683206	0.018743
RIOK2	protein_coding	ENSG00000058729	0.432319	5.36235	3.72519e-09	3.3758e-08
YIPF1	protein_coding	ENSG00000058799	0.067666	4.27276	0.376731	0.51279
NDC1	protein_coding	ENSG00000058804	0.422057	6.44946	1.20368e-10	1.33609e-09
DGKG	protein_coding	ENSG00000058866	0.305635	2.34974	0.00579603	0.0162525
FLYWCH1	protein_coding	ENSG00000059122	0.33705	5.22279	2.13138e-06	1.25556e-05
UNKL	protein_coding	ENSG00000059145	0.368005	5.42866	8.69031e-08	6.4786e-07
TBXAS1	protein_coding	ENSG00000059377	-0.30935	0.459778	0.0735988	0.140496
PARP12	protein_coding	ENSG00000059378	0.0515617	4.34019	0.490192	0.6237
ALDH18A1	protein_coding	ENSG00000059573	-0.138616	7.29626	0.0286493	0.0637541
TARBP1	protein_coding	ENSG00000059588	-0.26828	2.42448	0.0129459	0.0324585
GATB	protein_coding	ENSG00000059691	0.242994	3.99713	0.00385208	0.0113689
MXD1	protein_coding	ENSG00000059728	0.132505	2.75407	0.161421	0.266129
CDK17	protein_coding	ENSG00000059758	0.177607	4.78024	0.020774	0.0486517
DNAJC25	protein_coding	ENSG00000059769	0.228771	3.54095	0.0108105	0.0277961
SLC2A3	protein_coding	ENSG00000059804	-0.0123788	5.67057	0.84876	0.914826
PSD	protein_coding	ENSG00000059915	-0.12908	2.15391	0.310417	0.44248
CTDP1	protein_coding	ENSG00000060069	0.322634	5.7029	6.90381e-07	4.40859e-06
YBX3	protein_coding	ENSG00000060138	0.00924866	8.88793	0.88678	0.941835
STYK1	protein_coding	ENSG00000060140	-0.112937	2.3092	0.278654	0.407558
WNK1	protein_coding	ENSG00000060237	0.380013	8.40569	1.92272e-08	1.58768e-07
CCAR1	protein_coding	ENSG00000060339	0.808513	7.56722	3.8952e-34	2.86048e-32
OGFR	protein_coding	ENSG00000060491	0.217775	7.09745	0.000946526	0.00327807
GNA15	protein_coding	ENSG00000060558	-0.469289	-1.17654	0.0702257	0.135376
CREB3L3	protein_coding	ENSG00000060566	1.00965	-3.61846	0.051376	0.104315
PIGV	protein_coding	ENSG00000060642	-0.626379	3.49593	7.2062e-13	1.04381e-11
PTPRU	protein_coding	ENSG00000060656	-0.0776621	5.7191	0.238211	0.360936
SNRNP40	protein_coding	ENSG00000060688	0.195058	5.93217	0.0044964	0.0129955
RIMBP2	protein_coding	ENSG00000060709	0.0855608	1.13007	0.518092	0.648847
COL11A1	protein_coding	ENSG00000060718	0.165888	7.31421	0.0112176	0.028717
QSER1	protein_coding	ENSG00000060749	0.687763	7.60974	9.88166e-23	3.53669e-21
MPC1	protein_coding	ENSG00000060762	-0.355116	4.16778	2.37392e-06	1.3833e-05
ACAA1	protein_coding	ENSG00000060971	0.114635	4.86829	0.0959284	0.174889
BCAT1	protein_coding	ENSG00000060982	-0.127807	7.53383	0.0478072	0.09827
HDAC7	protein_coding	ENSG00000061273	0.448874	6.93571	1.4509e-11	1.80702e-10
LZTS1	protein_coding	ENSG00000061337	-0.561803	2.94456	4.33219e-08	3.37591e-07
PRDM6	protein_coding	ENSG00000061455	1.15961	-2.00484	0.00152721	0.0050309
SPAG4	protein_coding	ENSG00000061656	-0.0432168	1.64147	0.746885	0.83944
NCKAP1	protein_coding	ENSG00000061676	0.0362784	7.94037	0.574497	0.699378
MRPS35	protein_coding	ENSG00000061794	0.262797	5.6337	0.000781884	0.00276512
GUCY1B1	protein_coding	ENSG00000061918	-0.963222	1.28558	6.29867e-10	6.34795e-09
SFSWAP	protein_coding	ENSG00000061936	0.549475	6.20974	6.82724e-17	1.50044e-15
TNK2	protein_coding	ENSG00000061938	0.256843	5.62306	0.000473078	0.00175795
MON2	protein_coding	ENSG00000061987	0.573552	5.61493	1.6581e-17	3.87755e-16
CDH3	protein_coding	ENSG00000062038	0.305299	-1.10112	0.332955	0.466541
GPBP1	protein_coding	ENSG00000062194	0.485323	6.65609	3.51573e-13	5.29934e-12
DGAT2	protein_coding	ENSG00000062282	-0.359712	3.27489	7.19849e-05	0.000320677
ZNF112	protein_coding	ENSG00000062370	0.646961	2.57618	2.96944e-09	2.73832e-08
CS	protein_coding	ENSG00000062485	0.0604822	7.92977	0.354788	0.489954
LTK	protein_coding	ENSG00000062524	0.371622	-0.439701	0.0843635	0.157195
MRPS24	protein_coding	ENSG00000062582	0.0920141	0.660204	0.560562	0.686858
ELMO2	protein_coding	ENSG00000062598	0.135538	6.19166	0.0364946	0.0782138
WAPL	protein_coding	ENSG00000062650	0.466481	7.35403	6.23832e-12	8.15761e-11
VMP1	protein_coding	ENSG00000062716	0.173501	8.00703	0.0100953	0.0262172
APPBP2	protein_coding	ENSG00000062725	0.351707	6.22493	6.24468e-08	4.75698e-07
POLD1	protein_coding	ENSG00000062822	-0.089767	6.54204	0.163453	0.268763
EIF4B	protein_coding	ENSG00000063046	0.234101	9.34244	0.000365756	0.00139575
SLC6A16	protein_coding	ENSG00000063127	0.482517	2.57726	0.0137528	0.0341846
BICRA	protein_coding	ENSG00000063169	0.711351	4.60055	4.43233e-17	9.94983e-16
SPHK2	protein_coding	ENSG00000063176	0.455322	3.91118	3.13464e-07	2.13168e-06
RPL18	protein_coding	ENSG00000063177	-0.27979	8.01604	6.11326e-05	0.000275956
CA11	protein_coding	ENSG00000063180	-0.0413637	4.27858	0.578639	0.703067
ISOC2	protein_coding	ENSG00000063241	-0.070782	5.12282	0.314681	0.44709
U2AF2	protein_coding	ENSG00000063244	0.302015	8.41383	2.65267e-06	1.5311e-05
EPN1	protein_coding	ENSG00000063245	-0.0040227	6.95077	0.952978	0.988305
MED29	protein_coding	ENSG00000063322	-0.00233961	5.30218	0.965883	0.998923
AHRR	protein_coding	ENSG00000063438	-0.192911	3.12277	0.0455171	0.0941496
GSC2	protein_coding	ENSG00000063515	-0.598908	-3.78524	0.583838	0.70771
ZNF275	protein_coding	ENSG00000063587	0.107021	5.44062	0.12276	0.212821
MTMR1	protein_coding	ENSG00000063601	0.17976	5.0752	0.00852733	0.0226608
GPC1	protein_coding	ENSG00000063660	-0.332499	8.79667	1.30166e-06	7.96773e-06
ADCK1	protein_coding	ENSG00000063761	-0.147447	2.07144	0.200759	0.316127
HAGH	protein_coding	ENSG00000063854	-0.210606	4.26057	0.00558005	0.0157219
RNF4	protein_coding	ENSG00000063978	0.445218	6.17092	7.68114e-12	9.97926e-11
CASP8	protein_coding	ENSG00000064012	0.417931	5.72762	1.09967e-09	1.0763e-08
LIMCH1	protein_coding	ENSG00000064042	-0.310618	7.49855	1.8046e-05	9.01627e-05
INTS13	protein_coding	ENSG00000064102	0.439777	6.09524	4.90206e-09	4.37804e-08
TM7SF3	protein_coding	ENSG00000064115	-0.33593	6.74985	2.39843e-07	1.65865e-06
DLX3	protein_coding	ENSG00000064195	0.105679	-0.31793	0.596124	0.718696
SPA17	protein_coding	ENSG00000064199	-0.0341235	3.71588	0.71822	0.816335
TSPAN32	protein_coding	ENSG00000064201	-1.74916	-4.11275	0.0601026	0.118755
WISP2	protein_coding	ENSG00000064205	0.164528	-2.48372	0.657616	0.769081
DMRT3	protein_coding	ENSG00000064218	-0.992835	-1.50758	0.00540128	0.0152646
ST3GAL6	protein_coding	ENSG00000064225	-0.238873	2.46643	0.0188606	0.0448023
ATP2C2	protein_coding	ENSG00000064270	0.46791	-1.61337	0.176354	0.285524
NGFR	protein_coding	ENSG00000064300	0.406796	2.4848	0.000306179	0.00118855
CDON	protein_coding	ENSG00000064309	0.567038	3.3786	4.85569e-10	4.9622e-09
TAF2	protein_coding	ENSG00000064313	0.281163	7.08618	2.01648e-05	9.97759e-05
HIPK2	protein_coding	ENSG00000064393	-0.0620958	6.4452	0.405619	0.542213
TNPO3	protein_coding	ENSG00000064419	0.401835	6.27924	3.75336e-09	3.39877e-08
RFXANK	protein_coding	ENSG00000064490	-0.323505	4.07335	2.59827e-05	0.000125975
TMEM161A	protein_coding	ENSG00000064545	0.0225872	2.8361	0.792841	0.873253
LPAR2	protein_coding	ENSG00000064547	0.0755613	1.77421	0.555016	0.682214
CTSA	protein_coding	ENSG00000064601	0.0319647	6.63756	0.620869	0.739563
SUGP2	protein_coding	ENSG00000064607	0.733406	6.75329	3.19376e-30	1.85369e-28
SLC12A2	protein_coding	ENSG00000064651	-0.195605	6.34537	0.00310628	0.00941382
SNX24	protein_coding	ENSG00000064652	0.0936573	4.77643	0.227772	0.348693
EYA2	protein_coding	ENSG00000064655	-0.925549	2.24425	2.25428e-17	5.21602e-16
CNN2	protein_coding	ENSG00000064666	-0.361123	7.13876	2.54043e-08	2.05478e-07
ABCA7	protein_coding	ENSG00000064687	0.174346	2.60537	0.106809	0.190528
SNCAIP	protein_coding	ENSG00000064692	-0.852953	-0.148473	2.40461e-05	0.000117223
DDX20	protein_coding	ENSG00000064703	0.360164	6.04123	3.10383e-08	2.47556e-07
BTBD1	protein_coding	ENSG00000064726	-0.0739361	6.56081	0.258925	0.384603
FAR2	protein_coding	ENSG00000064763	-0.468158	1.96592	7.04828e-05	0.000314567
BCAS1	protein_coding	ENSG00000064787	-0.028458	-1.55704	0.899938	0.95082
CHI3L2	protein_coding	ENSG00000064886	-0.450073	-0.296026	0.0495043	0.101189
SBNO2	protein_coding	ENSG00000064932	-0.482345	5.33494	2.52524e-11	3.0489e-10
PMS1	protein_coding	ENSG00000064933	0.0872234	4.39927	0.244516	0.368104
HMG20B	protein_coding	ENSG00000064961	0.38538	6.75406	2.45454e-09	2.29602e-08
CALCRL	protein_coding	ENSG00000064989	-0.0681777	-1.67416	0.83948	0.9081
TAF11	protein_coding	ENSG00000064995	0.157801	5.82536	0.0224208	0.0518261
ANKS1A	protein_coding	ENSG00000064999	0.0991314	5.50795	0.135622	0.230603
AP3D1	protein_coding	ENSG00000065000	0.192163	7.06266	0.00262255	0.00811738
ZNF76	protein_coding	ENSG00000065029	0.00510725	4.13314	0.944767	0.981932
SLC9A3R2	protein_coding	ENSG00000065054	0.232535	4.58715	0.00157279	0.00516059
NTHL1	protein_coding	ENSG00000065057	0.26718	3.39968	0.00538026	0.0152178
UHRF1BP1	protein_coding	ENSG00000065060	-0.711136	6.3344	1.06511e-24	4.38552e-23
GNAI3	protein_coding	ENSG00000065135	0.0883709	7.56447	0.176362	0.285524
IPO5	protein_coding	ENSG00000065150	0.0521587	7.6355	0.425341	0.561719
OAT	protein_coding	ENSG00000065154	-0.290507	7.23202	7.57955e-06	4.0436e-05
WDR3	protein_coding	ENSG00000065183	0.220291	7.28943	0.00333028	0.010007
PKN2	protein_coding	ENSG00000065243	0.395322	6.59637	2.16125e-09	2.0359e-08
WDR18	protein_coding	ENSG00000065268	-0.137014	5.20624	0.052098	0.105541
TRAM2	protein_coding	ENSG00000065308	0.737659	7.059	1.04228e-28	5.48154e-27
NTN1	protein_coding	ENSG00000065320	-0.371811	5.88424	1.08904e-07	7.99991e-07
GLP2R	protein_coding	ENSG00000065325	-0.3956	4.89999	3.18014e-08	2.53305e-07
MCM10	protein_coding	ENSG00000065328	-0.271266	6.48912	5.09526e-05	0.000233904
DGKA	protein_coding	ENSG00000065357	-0.140512	4.35617	0.0739817	0.141105
ERBB3	protein_coding	ENSG00000065361	0.49319	1.48606	0.000898729	0.00313145
ANKRD44	protein_coding	ENSG00000065413	-0.426985	3.19453	3.13015e-06	1.78241e-05
KARS	protein_coding	ENSG00000065427	0.0417581	7.82523	0.516379	0.647072
ADAT1	protein_coding	ENSG00000065457	-0.287873	4.99986	0.000110361	0.000472159
PDIA5	protein_coding	ENSG00000065485	0.239409	5.16234	0.000390876	0.00148268
TBC1D22B	protein_coding	ENSG00000065491	-0.34309	5.33814	5.66568e-07	3.67941e-06
NDUFB4	protein_coding	ENSG00000065518	-0.2778	6.29479	0.0001273	0.00053597
SPEN	protein_coding	ENSG00000065526	0.446379	6.97361	3.08976e-10	3.2386e-09
MYLK	protein_coding	ENSG00000065534	-0.366512	5.90588	7.8221e-08	5.87683e-07
ZC3H15	protein_coding	ENSG00000065548	0.397863	7.29482	5.18665e-08	3.98503e-07
MAP2K4	protein_coding	ENSG00000065559	0.096113	5.43806	0.172963	0.281212
TMEM206	protein_coding	ENSG00000065600	0.513043	3.6057	5.57751e-10	5.65903e-09
SNAP91	protein_coding	ENSG00000065609	-1.84511	-0.109633	1.58214e-15	3.02934e-14
SLK	protein_coding	ENSG00000065613	-0.19853	6.83978	0.00781539	0.0210334
CYB5R4	protein_coding	ENSG00000065615	0.0131118	4.73142	0.891006	0.944741
COL17A1	protein_coding	ENSG00000065618	0.524773	4.55614	1.82677e-13	2.84246e-12
GSTO2	protein_coding	ENSG00000065621	-0.166528	3.84644	0.0361664	0.0776347
SEC61A2	protein_coding	ENSG00000065665	0.0914962	4.45395	0.235718	0.358059
PRKCQ	protein_coding	ENSG00000065675	-0.0188645	3.39017	0.851155	0.916608
TLE2	protein_coding	ENSG00000065717	-0.235112	3.59018	0.0103026	0.026678
ASB1	protein_coding	ENSG00000065802	-0.102483	6.21779	0.120112	0.209208
FAM107B	protein_coding	ENSG00000065809	-0.359281	6.03693	2.23092e-07	1.55486e-06
ME1	protein_coding	ENSG00000065833	-0.697238	4.63377	9.91469e-21	3.12995e-19
TBC1D1	protein_coding	ENSG00000065882	-0.119755	7.02395	0.0697079	0.134583
CDK13	protein_coding	ENSG00000065883	0.376021	6.83513	4.89708e-09	4.37522e-08
MTHFD2	protein_coding	ENSG00000065911	-0.684732	8.1338	2.44629e-22	8.62719e-21
SLC9A7	protein_coding	ENSG00000065923	0.283457	5.46305	3.17598e-05	0.000151524
FOXJ2	protein_coding	ENSG00000065970	0.319254	5.97671	1.06207e-06	6.59843e-06
YBX1	protein_coding	ENSG00000065978	0.0730813	11.0175	0.289308	0.419742
PDE4A	protein_coding	ENSG00000065989	-0.367666	4.77464	6.89937e-07	4.40693e-06
PPP2R5A	protein_coding	ENSG00000066027	0.0337675	4.939	0.662012	0.772633
CTNNA2	protein_coding	ENSG00000066032	0.330159	-0.30312	0.123463	0.213808
ELAVL1	protein_coding	ENSG00000066044	0.0405358	6.52719	0.530557	0.660372
TIE1	protein_coding	ENSG00000066056	-0.0616703	1.89077	0.553419	0.680808
DIP2B	protein_coding	ENSG00000066084	0.712934	6.13165	1.96611e-23	7.35368e-22
SMARCD1	protein_coding	ENSG00000066117	0.287615	6.50205	6.22637e-06	3.37249e-05
KDM4A	protein_coding	ENSG00000066135	0.779367	5.25228	9.04683e-30	5.09138e-28
NFYC	protein_coding	ENSG00000066136	0.444851	6.14203	1.56205e-11	1.94044e-10
ZMYND12	protein_coding	ENSG00000066185	-1.34677	-3.35179	0.0415347	0.0871848
SLC9A3	protein_coding	ENSG00000066230	-0.207782	-1.95216	0.519783	0.650492
NGEF	protein_coding	ENSG00000066248	-0.397667	1.66103	0.00226911	0.00713898
ASPM	protein_coding	ENSG00000066279	1.74617	7.35943	3.48861e-123	4.94295e-120
ELOVL1	protein_coding	ENSG00000066322	0.296075	7.01871	3.90472e-06	2.18881e-05
SPI1	protein_coding	ENSG00000066336	0.14586	-3.16117	0.80748	0.885005
ZNRD1	protein_coding	ENSG00000066379	0.17406	3.0329	0.11503	0.20211
MPPED2	protein_coding	ENSG00000066382	-0.712611	0.638517	4.87857e-06	2.68902e-05
ZBTB11	protein_coding	ENSG00000066422	0.659295	6.04091	2.97111e-23	1.1027e-21
ATXN3	protein_coding	ENSG00000066427	0.188282	4.12405	0.0287347	0.0639089
GOLGA5	protein_coding	ENSG00000066455	0.0402859	5.18898	0.598343	0.720218
FGFR2	protein_coding	ENSG00000066468	-0.286463	4.56586	0.000102075	0.000439836
LRRC40	protein_coding	ENSG00000066557	-0.189725	5.16004	0.00736771	0.0199894
ISOC1	protein_coding	ENSG00000066583	-0.657581	5.36042	4.30393e-21	1.39715e-19
EML1	protein_coding	ENSG00000066629	-0.00398115	3.00091	0.967773	1
TRMT11	protein_coding	ENSG00000066651	-0.03727	4.0278	0.626072	0.743456
THUMPD1	protein_coding	ENSG00000066654	0.554624	5.85261	3.20494e-16	6.67797e-15
MSANTD3	protein_coding	ENSG00000066697	-0.109933	6.31894	0.111055	0.196791
KIF26A	protein_coding	ENSG00000066735	-1.00786	3.85456	1.55997e-25	6.85675e-24
ATG2B	protein_coding	ENSG00000066739	-0.0771317	3.93624	0.342099	0.476112
ARFGEF1	protein_coding	ENSG00000066777	0.120548	6.46984	0.0845586	0.157461
ZFAT	protein_coding	ENSG00000066827	1.01767	3.77558	8.5558e-34	6.1887e-32
MTFR1	protein_coding	ENSG00000066855	0.11306	5.03139	0.116441	0.204175
STAG3	protein_coding	ENSG00000066923	0.811173	-1.07612	0.00108375	0.00370168
FECH	protein_coding	ENSG00000066926	-0.488854	4.41678	4.5036e-11	5.26338e-10
MYO9A	protein_coding	ENSG00000066933	0.510505	5.36158	4.94964e-13	7.28296e-12
PFKP	protein_coding	ENSG00000067057	-0.0623375	6.99762	0.34144	0.475418
IDI1	protein_coding	ENSG00000067064	-0.0123394	5.52613	0.854048	0.91852
SP100	protein_coding	ENSG00000067066	0.168607	5.26538	0.0200629	0.0472292
KLF6	protein_coding	ENSG00000067082	0.138904	6.50212	0.102942	0.18507
PLPP1	protein_coding	ENSG00000067113	-0.188767	3.54644	0.0261451	0.0589716
NEO1	protein_coding	ENSG00000067141	-0.186075	6.08501	0.0044271	0.0128229
TRAM1	protein_coding	ENSG00000067167	0.136525	7.88786	0.0439917	0.0914972
PHKA1	protein_coding	ENSG00000067177	-0.576248	4.59855	1.95173e-13	3.02908e-12
TNFRSF1A	protein_coding	ENSG00000067182	-0.374092	6.74331	6.45091e-09	5.67921e-08
CACNB1	protein_coding	ENSG00000067191	0.146126	4.43506	0.060469	0.119308
EVI5	protein_coding	ENSG00000067208	0.882254	4.43617	2.44056e-31	1.49202e-29
STOML1	protein_coding	ENSG00000067221	-0.563267	2.52894	1.47292e-06	8.92311e-06
PKM	protein_coding	ENSG00000067225	0.012099	11.4311	0.852811	0.91794
DHX29	protein_coding	ENSG00000067248	0.206364	6.15665	0.00311068	0.00942596
DNTTIP2	protein_coding	ENSG00000067334	0.332729	6.93896	1.30995e-06	8.01035e-06
METTL22	protein_coding	ENSG00000067365	0.179969	4.59685	0.0129521	0.0324705
TP53BP1	protein_coding	ENSG00000067369	0.365377	6.44232	2.53011e-08	2.04988e-07
TRO	protein_coding	ENSG00000067445	0.0405346	6.1199	0.528329	0.658415
RRP15	protein_coding	ENSG00000067533	0.0203882	5.34519	0.796458	0.876155
RHOA	protein_coding	ENSG00000067560	-0.133435	8.68296	0.0371183	0.0793668
DHX8	protein_coding	ENSG00000067596	0.320836	6.12699	3.5696e-06	2.01733e-05
PMS2P4	transcribed_unprocessed_pseudogene	ENSG00000067601	-0.399532	1.43774	0.00287402	0.00880328
PRKCZ	protein_coding	ENSG00000067606	0.337901	4.11945	1.53041e-05	7.7476e-05
IARS2	protein_coding	ENSG00000067704	-0.163637	7.15829	0.0133651	0.0333463
SYT1	protein_coding	ENSG00000067715	0.688071	2.27116	1.82446e-11	2.24787e-10
NAV3	protein_coding	ENSG00000067798	0.258147	5.75667	0.000137245	0.000574727
IDH3G	protein_coding	ENSG00000067829	0.267053	4.82984	0.000207087	0.00083595
ROGDI	protein_coding	ENSG00000067836	0.0495836	1.77459	0.680096	0.787041
PDZD4	protein_coding	ENSG00000067840	-0.631249	4.5216	1.15099e-17	2.73141e-16
ATP2B3	protein_coding	ENSG00000067842	-0.84086	0.207001	0.000167497	0.000688833
ROCK1	protein_coding	ENSG00000067900	0.413307	7.03028	1.26901e-09	1.22917e-08
CBFB	protein_coding	ENSG00000067955	-0.415388	6.75596	3.75598e-10	3.90294e-09
PDK3	protein_coding	ENSG00000067992	-0.140684	2.3012	0.233442	0.355476
HYAL2	protein_coding	ENSG00000068001	-0.0446989	5.08347	0.511991	0.642857
HDAC4	protein_coding	ENSG00000068024	0.717228	0.714639	3.00593e-06	1.71573e-05
RASSF1	protein_coding	ENSG00000068028	0.710823	4.36483	3.47779e-21	1.13972e-19
FGFR3	protein_coding	ENSG00000068078	-0.478113	2.52558	7.18643e-06	3.85356e-05
IFI35	protein_coding	ENSG00000068079	1.21649	-3.38747	0.0543663	0.109345
HEATR6	protein_coding	ENSG00000068097	0.121069	5.98072	0.0621535	0.122062
COASY	protein_coding	ENSG00000068120	0.075582	6.34354	0.235584	0.357923
PLEKHH3	protein_coding	ENSG00000068137	-0.306256	3.93321	0.00023263	0.000930019
MEF2A	protein_coding	ENSG00000068305	-0.237033	5.82841	0.000488125	0.00180662
OTUD5	protein_coding	ENSG00000068308	0.185934	6.13362	0.00473299	0.0135961
TFE3	protein_coding	ENSG00000068323	0.120238	7.1975	0.0609427	0.120066
TBC1D25	protein_coding	ENSG00000068354	0.00650217	4.42444	0.921677	0.965069
ACSL4	protein_coding	ENSG00000068366	0.147191	6.33185	0.0323674	0.070683
INPP5A	protein_coding	ENSG00000068383	0.225908	4.52318	0.00238424	0.00745544
GPKOW	protein_coding	ENSG00000068394	0.310787	5.22449	1.34999e-05	6.89799e-05
GRIPAP1	protein_coding	ENSG00000068400	0.308084	6.02152	6.15856e-06	3.33951e-05
FTSJ1	protein_coding	ENSG00000068438	0.0303136	6.93421	0.635874	0.750946
PRR11	protein_coding	ENSG00000068489	0.357561	8.34227	1.51286e-07	1.0868e-06
REEP1	protein_coding	ENSG00000068615	-1.4215	2.41964	1.29197e-37	1.17433e-35
ATP11A	protein_coding	ENSG00000068650	0.0219547	7.20575	0.734377	0.82961
POLR1A	protein_coding	ENSG00000068654	0.395301	7.35845	1.03423e-08	8.83388e-08
LAPTM4A	protein_coding	ENSG00000068697	-0.0283913	7.43607	0.662321	0.77282
TTC7A	protein_coding	ENSG00000068724	-0.0845964	4.50166	0.276978	0.405674
IP6K2	protein_coding	ENSG00000068745	0.635387	5.74931	8.8862e-22	3.04037e-20
SRBD1	protein_coding	ENSG00000068784	0.323463	5.06206	4.97797e-06	2.74005e-05
KIF2A	protein_coding	ENSG00000068796	0.241925	6.59137	0.000219951	0.000883289
RASGRP2	protein_coding	ENSG00000068831	-0.402288	0.345001	0.0202866	0.0476773
PSME4	protein_coding	ENSG00000068878	0.0687377	7.59175	0.287186	0.41742
IFT80	protein_coding	ENSG00000068885	0.225647	3.29771	0.00968702	0.0253181
SIRT2	protein_coding	ENSG00000068903	-0.145108	3.94117	0.0682311	0.132198
ERLEC1	protein_coding	ENSG00000068912	0.0309014	6.40409	0.635977	0.751031
PPP2R5B	protein_coding	ENSG00000068971	0.415216	3.05868	8.87167e-06	4.68257e-05
PYGM	protein_coding	ENSG00000068976	-0.157428	0.470478	0.468097	0.602621
PAGE1	protein_coding	ENSG00000068985	0.274858	-1.2778	0.31668	0.449052
PITX1	protein_coding	ENSG00000069011	0.00902907	4.39459	0.901116	0.951606
TRPC7	protein_coding	ENSG00000069018	0.929722	-3.5875	0.0457185	0.094522
MAST4	protein_coding	ENSG00000069020	-0.38685	5.1699	1.91646e-08	1.58306e-07
ADGRF5	protein_coding	ENSG00000069122	0.619366	2.35786	9.93945e-09	8.5109e-08
SDK2	protein_coding	ENSG00000069188	-0.132696	4.96964	0.0854707	0.158914
NUP133	protein_coding	ENSG00000069248	0.324429	5.93682	1.56987e-06	9.47233e-06
NUCKS1	protein_coding	ENSG00000069275	0.19635	8.83046	0.00422752	0.01231
VPS35	protein_coding	ENSG00000069329	0.175764	6.80734	0.00865225	0.0229548
DNAJA2	protein_coding	ENSG00000069345	0.240706	6.7913	0.000332932	0.00128218
BCL3	protein_coding	ENSG00000069399	-1.11858	3.74845	2.66279e-36	2.24261e-34
KCNAB2	protein_coding	ENSG00000069424	0.0254708	4.75048	0.728464	0.824671
ABCC9	protein_coding	ENSG00000069431	-0.474187	2.35033	4.86161e-06	2.6809e-05
GAL	protein_coding	ENSG00000069482	0.337986	-2.81931	0.461952	0.596816
CLEC2D	protein_coding	ENSG00000069493	-0.366267	1.92985	0.00705964	0.0192817
FUNDC1	protein_coding	ENSG00000069509	0.182583	4.37096	0.0200714	0.0472364
MAOB	protein_coding	ENSG00000069535	0.234461	3.44352	0.025051	0.0569732
RORA	protein_coding	ENSG00000069667	-0.161014	3.70418	0.0480044	0.0986083
DRD4	protein_coding	ENSG00000069696	0.369337	-0.763836	0.108039	0.19241
TGFBR3	protein_coding	ENSG00000069702	0.501263	2.4068	8.03766e-06	4.27097e-05
ATP1B3	protein_coding	ENSG00000069849	-0.174906	6.64053	0.00780707	0.0210151
NEDD4	protein_coding	ENSG00000069869	-0.0329653	6.33408	0.613626	0.733083
PIGB	protein_coding	ENSG00000069943	-0.0473839	3.03046	0.637341	0.752017
MAPK6	protein_coding	ENSG00000069956	0.169502	7.11553	0.0123461	0.0312079
GNB5	protein_coding	ENSG00000069966	-0.0576009	4.95146	0.401688	0.538273
RAB27A	protein_coding	ENSG00000069974	-0.576746	4.27425	7.65594e-14	1.23268e-12
HDHD5	protein_coding	ENSG00000069998	0.0290983	5.19278	0.680483	0.787338
UFD1	protein_coding	ENSG00000070010	0.114041	7.44736	0.074668	0.142131
LRP6	protein_coding	ENSG00000070018	0.535831	7.38905	7.30982e-15	1.30231e-13
PHRF1	protein_coding	ENSG00000070047	0.244126	6.25652	0.000151098	0.000627225
ELP1	protein_coding	ENSG00000070061	-0.0620074	5.72174	0.346998	0.481321
NUCB2	protein_coding	ENSG00000070081	-0.0575091	7.04863	0.407612	0.544394
PFN2	protein_coding	ENSG00000070087	-0.238834	7.00872	0.000220482	0.000885272
PTPN3	protein_coding	ENSG00000070159	-0.0218261	4.87913	0.746594	0.83916
SPTB	protein_coding	ENSG00000070182	-0.241431	5.78729	0.00026959	0.00106018
DAPP1	protein_coding	ENSG00000070190	-1.02842	-1.09	0.000141723	0.000591389
SLC44A1	protein_coding	ENSG00000070214	-0.282583	5.63438	4.14102e-05	0.00019293
TMEM260	protein_coding	ENSG00000070269	-0.0930773	4.22919	0.227587	0.348477
SMG6	protein_coding	ENSG00000070366	0.274652	5.68464	3.40581e-05	0.000161461
EXOC5	protein_coding	ENSG00000070367	0.0961137	7.44809	0.155156	0.257723
CLTCL1	protein_coding	ENSG00000070371	-0.154527	5.09175	0.0232511	0.0534653
FSTL3	protein_coding	ENSG00000070404	-0.457699	7.26524	1.31977e-12	1.85794e-11
DGCR2	protein_coding	ENSG00000070413	0.150766	5.7944	0.0363111	0.0778967
RNF126	protein_coding	ENSG00000070423	-0.14241	4.94381	0.0448307	0.0929496
MNT	protein_coding	ENSG00000070444	-0.84902	4.53952	9.80782e-28	4.82125e-26
ZXDC	protein_coding	ENSG00000070476	0.0765211	4.82733	0.279921	0.409006
JMJD6	protein_coding	ENSG00000070495	0.637999	5.74941	3.19699e-22	1.11441e-20
POLB	protein_coding	ENSG00000070501	0.00408005	4.18009	0.990214	1
WIPI1	protein_coding	ENSG00000070540	-0.255011	4.00913	0.00115973	0.0039322
FRMPD1	protein_coding	ENSG00000070601	-0.274906	-1.07561	0.341153	0.475184
GBA2	protein_coding	ENSG00000070610	0.38702	6.20459	2.945e-09	2.71786e-08
NDST1	protein_coding	ENSG00000070614	-0.137272	8.42045	0.0380117	0.080961
ASNS	protein_coding	ENSG00000070669	-0.120087	1.79387	0.332983	0.466541
AP3M2	protein_coding	ENSG00000070718	0.104485	5.2696	0.129452	0.22212
CNGB1	protein_coding	ENSG00000070729	0.298864	-1.59764	0.314944	0.44737
CHAT	protein_coding	ENSG00000070748	-1.4632	-0.281414	1.34174e-11	1.67626e-10
PABPC1	protein_coding	ENSG00000070756	0.31694	10.7651	3.03199e-06	1.72979e-05
TESK2	protein_coding	ENSG00000070759	1.07983	2.40284	3.26974e-22	1.13812e-20
CFAP20	protein_coding	ENSG00000070761	-0.20211	5.91088	0.00400818	0.0117494
CSNK2A2	protein_coding	ENSG00000070770	0.167991	7.05527	0.00965998	0.0252556
PTPN21	protein_coding	ENSG00000070778	-0.114077	6.08665	0.0835242	0.155909
EIF2B3	protein_coding	ENSG00000070785	0.0458105	5.22117	0.541691	0.670119
CAMK2A	protein_coding	ENSG00000070808	-1.23382	-0.182049	8.67507e-11	9.78719e-10
TCOF1	protein_coding	ENSG00000070814	0.158504	8.23385	0.0142764	0.0353164
CDC42	protein_coding	ENSG00000070831	0.0214643	-0.214006	0.939455	0.97824
OSBPL3	protein_coding	ENSG00000070882	0.535875	6.33352	1.14357e-16	2.45938e-15
EPHA8	protein_coding	ENSG00000070886	-0.480986	-0.137272	0.0369349	0.0790169
SLC12A3	protein_coding	ENSG00000070915	-1.52917	-2.42968	0.000370959	0.00141404
RAD18	protein_coding	ENSG00000070950	-0.0671784	5.27016	0.32254	0.45518
ATP2B1	protein_coding	ENSG00000070961	-0.274894	7.05459	2.24188e-05	0.000110212
NCK2	protein_coding	ENSG00000071051	0.282376	6.48898	8.73539e-06	4.61829e-05
MAP4K4	protein_coding	ENSG00000071054	0.348124	8.81746	3.96348e-07	2.64822e-06
MGAT4A	protein_coding	ENSG00000071073	-1.10641	2.62663	9.49601e-23	3.4088e-21
RPL31	protein_coding	ENSG00000071082	-0.0664966	7.66176	0.383519	0.519738
WDR1	protein_coding	ENSG00000071127	-0.128163	8.2601	0.061115	0.120346
SNX13	protein_coding	ENSG00000071189	0.17316	5.94514	0.0107993	0.0277701
MS4A12	protein_coding	ENSG00000071203	-0.242037	-3.82525	1	1
ARHGAP10	protein_coding	ENSG00000071205	-0.0654682	4.1905	0.415974	0.552559
RPS6KA2	protein_coding	ENSG00000071242	-0.41603	3.1102	3.90059e-06	2.187e-05
ING3	protein_coding	ENSG00000071243	0.312031	3.47417	0.000431049	0.00161901
VASH1	protein_coding	ENSG00000071246	-0.503412	4.34573	1.41285e-10	1.54899e-09
LMCD1	protein_coding	ENSG00000071282	-1.15944	4.96962	6.5367e-53	1.21115e-50
BUD23	protein_coding	ENSG00000071462	0.0620356	6.84801	0.337116	0.470786
SEL1L	protein_coding	ENSG00000071537	-0.0338244	8.06953	0.608642	0.728582
TRIP13	protein_coding	ENSG00000071539	-0.175828	6.5238	0.00711669	0.0194089
ATP6AP1	protein_coding	ENSG00000071553	-0.0646752	6.75375	0.323385	0.456186
TCF3	protein_coding	ENSG00000071564	0.196356	7.32967	0.00219307	0.00692598
TRIB2	protein_coding	ENSG00000071575	0.135135	6.09436	0.0576162	0.114711
DAZAP1	protein_coding	ENSG00000071626	0.242068	7.62118	0.000190922	0.000775478
MBD3	protein_coding	ENSG00000071655	-0.188401	5.59111	0.00691403	0.0189485
HLTF	protein_coding	ENSG00000071794	0.186519	5.95875	0.00651057	0.0179819
FAM50A	protein_coding	ENSG00000071859	0.0395238	6.26956	0.544372	0.672563
FAM3A	protein_coding	ENSG00000071889	-0.324259	4.27503	2.02535e-05	0.000100071
CPSF1	protein_coding	ENSG00000071894	0.266945	7.68982	3.53012e-05	0.00016702
MYO3B	protein_coding	ENSG00000071909	0.0162592	-2.39124	1	1
CYBRD1	protein_coding	ENSG00000071967	-0.244644	5.77344	0.00025075	0.000996174
CDH19	protein_coding	ENSG00000071991	1.68156	-2.77018	3.88089e-05	0.00018176
PDCD2	protein_coding	ENSG00000071994	-0.011942	6.42684	0.848537	0.914661
SLC6A15	protein_coding	ENSG00000072041	-0.0843348	4.23959	0.269652	0.3974
RDH11	protein_coding	ENSG00000072042	0.47087	7.24582	2.66802e-12	3.64312e-11
PRKACA	protein_coding	ENSG00000072062	-0.0767683	5.96674	0.247347	0.371553
ADGRL1	protein_coding	ENSG00000072071	0.0952118	5.69764	0.181354	0.291919
ACTN1	protein_coding	ENSG00000072110	0.112756	9.84087	0.0808353	0.151736
ZFYVE26	protein_coding	ENSG00000072121	0.357198	5.83853	1.86334e-07	1.31852e-06
RPS6KA6	protein_coding	ENSG00000072133	-0.5285	4.01392	5.15861e-11	5.98822e-10
EPN2	protein_coding	ENSG00000072134	-0.589469	5.83358	2.78437e-17	6.36916e-16
PTPN18	protein_coding	ENSG00000072135	-0.0196147	5.81495	0.764354	0.852676
LIMS2	protein_coding	ENSG00000072163	-0.649883	3.21231	1.74656e-11	2.15851e-10
ASIC4	protein_coding	ENSG00000072182	-0.595094	-1.65359	0.104525	0.187314
SPEG	protein_coding	ENSG00000072195	-0.0523847	6.62307	0.45631	0.591749
LNX1	protein_coding	ENSG00000072201	-0.505106	2.16078	1.90391e-05	9.479e-05
ALDH3A2	protein_coding	ENSG00000072210	-0.0490953	5.33123	0.471253	0.605617
TFRC	protein_coding	ENSG00000072274	-0.0150157	9.56345	0.824652	0.897497
SREBF1	protein_coding	ENSG00000072310	0.252952	6.56329	0.00047445	0.00176169
AFF4	protein_coding	ENSG00000072364	0.129851	8.29025	0.0532849	0.107476
UBE2D1	protein_coding	ENSG00000072401	0.0640112	5.35088	0.367288	0.50292
MPP5	protein_coding	ENSG00000072415	0.520957	7.39065	3.03317e-15	5.61567e-14
RHOBTB1	protein_coding	ENSG00000072422	-0.349029	5.15531	1.38243e-06	8.41723e-06
SMC1A	protein_coding	ENSG00000072501	-0.0530627	8.21605	0.436523	0.572745
HSD17B10	protein_coding	ENSG00000072506	-0.0613355	6.00841	0.354913	0.489992
MARK2	protein_coding	ENSG00000072518	0.0737801	5.51388	0.286333	0.41648
HMMR	protein_coding	ENSG00000072571	0.670329	6.75749	7.72436e-21	2.46107e-19
CHFR	protein_coding	ENSG00000072609	0.172434	3.4529	0.0402275	0.0848847
TRHDE	protein_coding	ENSG00000072657	0.03287	3.47587	0.696461	0.80048
P4HA2	protein_coding	ENSG00000072682	0.070542	6.55192	0.27157	0.399509
NFATC3	protein_coding	ENSG00000072736	0.495427	5.26694	3.00475e-12	4.08669e-11
TRNT1	protein_coding	ENSG00000072756	0.347825	5.4049	7.85891e-07	4.96974e-06
ACADVL	protein_coding	ENSG00000072778	0.226119	7.671	0.000592758	0.00215026
STK10	protein_coding	ENSG00000072786	-0.134166	6.33677	0.0399695	0.0844366
FBXW11	protein_coding	ENSG00000072803	0.0942919	6.24856	0.15845	0.261949
ACAP1	protein_coding	ENSG00000072818	-0.551277	1.16483	0.00036634	0.00139775
CRMP1	protein_coding	ENSG00000072832	-0.393332	6.04612	3.99102e-09	3.60179e-08
EVC	protein_coding	ENSG00000072840	0.117638	4.26251	0.186004	0.29783
DERL2	protein_coding	ENSG00000072849	-0.104691	5.1638	0.129497	0.222181
SIDT1	protein_coding	ENSG00000072858	-0.115322	-2.6534	0.854526	0.918759
NDE1	protein_coding	ENSG00000072864	1.1038	5.9372	7.03867e-62	1.74784e-59
MRVI1	protein_coding	ENSG00000072952	0.444402	-3.74693	0.471659	0.606008
TMEM38A	protein_coding	ENSG00000072954	-0.604669	3.17462	2.09339e-11	2.5518e-10
AP1M1	protein_coding	ENSG00000072958	-0.0054693	5.51213	0.937195	0.976435
PVR	protein_coding	ENSG00000073008	0.188892	7.24814	0.00319484	0.00964941
XRCC1	protein_coding	ENSG00000073050	0.107057	5.24428	0.114622	0.201531
SCARB1	protein_coding	ENSG00000073060	0.18235	6.92857	0.00469457	0.0134986
MCM2	protein_coding	ENSG00000073111	-0.397524	7.17538	6.90374e-10	6.93455e-09
MOV10L1	protein_coding	ENSG00000073146	0.413111	1.55579	0.00155598	0.0051121
PANX2	protein_coding	ENSG00000073150	-0.0284613	3.16378	0.753613	0.84438
SELENOO	protein_coding	ENSG00000073169	0.0637375	4.62914	0.447325	0.583142
TP63	protein_coding	ENSG00000073282	0.319004	-1.43787	0.188467	0.300616
ALPK1	protein_coding	ENSG00000073331	0.365673	3.69469	4.04979e-05	0.000188899
LLGL2	protein_coding	ENSG00000073350	-0.683638	0.171774	0.00101175	0.00347995
PDE8A	protein_coding	ENSG00000073417	0.174195	5.73952	0.012577	0.0316918
CLCN4	protein_coding	ENSG00000073464	0.329447	4.2124	2.88887e-05	0.000138835
NLE1	protein_coding	ENSG00000073536	0.23392	5.22198	0.000607889	0.00220018
SDHA	protein_coding	ENSG00000073578	-0.191075	6.74504	0.00280715	0.00862446
SMARCE1	protein_coding	ENSG00000073584	0.415637	2.65585	9.84436e-05	0.00042591
GSDMB	protein_coding	ENSG00000073605	0.108053	4.20068	0.224708	0.345339
KDM5A	protein_coding	ENSG00000073614	0.560615	6.23366	8.65639e-16	1.70767e-14
ADAM11	protein_coding	ENSG00000073670	0.147896	2.53186	0.209485	0.326805
PPP2R3A	protein_coding	ENSG00000073711	-0.0269508	5.6064	0.700288	0.803269
FERMT2	protein_coding	ENSG00000073712	-0.172266	7.42818	0.0116388	0.0296503
ABCB11	protein_coding	ENSG00000073734	1.55098	-3.61665	0.00504968	0.0144045
DHRS9	protein_coding	ENSG00000073737	0.524356	-2.678	0.207705	0.324701
CD5L	protein_coding	ENSG00000073754	1.11935	-3.97165	0.0659986	0.128451
PTGS2	protein_coding	ENSG00000073756	-1.58009	2.00636	4.07211e-30	2.34093e-28
IGF2BP2	protein_coding	ENSG00000073792	0.621723	7.28296	1.85713e-21	6.17854e-20
MAP3K13	protein_coding	ENSG00000073803	-0.127497	4.67388	0.0857009	0.159293
ST6GAL1	protein_coding	ENSG00000073849	-0.293928	2.6642	0.0045766	0.0132067
TBX21	protein_coding	ENSG00000073861	-0.710971	-3.19522	0.291535	0.422338
VDAC1P1	processed_pseudogene	ENSG00000073905	-0.203728	-1.37942	0.680533	0.787357
FRY	protein_coding	ENSG00000073910	0.168517	1.56187	0.174016	0.2826
PICALM	protein_coding	ENSG00000073921	0.128554	7.6021	0.0602659	0.119005
NSF	protein_coding	ENSG00000073969	0.113271	5.28465	0.0984639	0.178578
GLI2	protein_coding	ENSG00000074047	0.300017	6.16701	3.5683e-05	0.000168628
CLASP1	protein_coding	ENSG00000074054	0.406495	6.7912	5.22036e-10	5.31907e-09
MRPS34	protein_coding	ENSG00000074071	0.0818289	7.07526	0.268447	0.395987
NOTCH3	protein_coding	ENSG00000074181	-0.662917	6.00051	1.06382e-18	2.7762e-17
CLNS1A	protein_coding	ENSG00000074201	0.0909065	7.08977	0.181038	0.291527
PPP2R2C	protein_coding	ENSG00000074211	-0.176409	6.21868	0.00742416	0.0201109
TEAD2	protein_coding	ENSG00000074219	-0.0592147	4.80042	0.432465	0.56885
EED	protein_coding	ENSG00000074266	-0.107321	4.75671	0.126349	0.217679
CDHR2	protein_coding	ENSG00000074276	-0.775094	-3.80686	0.25578	0.38106
SNCB	protein_coding	ENSG00000074317	-0.431929	1.15762	0.0117676	0.0299207
TSG101	protein_coding	ENSG00000074319	-0.223767	5.26194	0.00105346	0.00360846
NCBP3	protein_coding	ENSG00000074356	0.265769	5.85339	6.11952e-05	0.000276187
ATP2A3	protein_coding	ENSG00000074370	-0.627939	1.64549	2.09673e-06	1.23602e-05
CA12	protein_coding	ENSG00000074410	0.349524	4.85019	5.81062e-07	3.7644e-06
MGLL	protein_coding	ENSG00000074416	-0.199187	5.78582	0.00413127	0.0120618
NTN4	protein_coding	ENSG00000074527	-0.502379	4.41292	4.15764e-12	5.56052e-11
BCS1L	protein_coding	ENSG00000074582	-0.0564827	4.701	0.44192	0.578161
NUAK1	protein_coding	ENSG00000074590	0.00815262	6.16063	0.899007	0.950295
DPP8	protein_coding	ENSG00000074603	0.0526603	5.71291	0.424935	0.561367
SLC24A1	protein_coding	ENSG00000074621	0.110673	4.32729	0.152539	0.254182
ZNF532	protein_coding	ENSG00000074657	0.124239	6.98409	0.0611618	0.120419
SCARF1	protein_coding	ENSG00000074660	-0.502442	0.49931	0.0022931	0.00720504
LMAN1	protein_coding	ENSG00000074695	0.0579243	8.15516	0.365657	0.501238
HACD3	protein_coding	ENSG00000074696	0.196484	7.95513	0.00235197	0.00736982
IPCEF1	protein_coding	ENSG00000074706	0.0288992	-3.05016	1	1
ZZEF1	protein_coding	ENSG00000074755	0.180869	5.23897	0.0102351	0.026526
ENO1	protein_coding	ENSG00000074800	-0.128476	11.3344	0.0511819	0.104009
MYDGF	protein_coding	ENSG00000074842	-0.0846647	6.58825	0.201752	0.317268
ANO8	protein_coding	ENSG00000074855	-0.0840122	3.12921	0.400506	0.537048
TUBE1	protein_coding	ENSG00000074935	0.14084	4.41504	0.0973166	0.176951
ARHGEF10L	protein_coding	ENSG00000074964	-0.314693	3.60685	0.00034533	0.00132557
TXK	protein_coding	ENSG00000074966	-0.269959	-1.98564	0.492676	0.625954
WSCD2	protein_coding	ENSG00000075035	-0.165565	-3.07242	0.773616	0.859546
KCNQ2	protein_coding	ENSG00000075043	-0.583921	-1.30589	0.0293276	0.0650413
TACR2	protein_coding	ENSG00000075073	0.910283	-3.19683	0.0866591	0.160702
ACTR6	protein_coding	ENSG00000075089	0.176603	3.69484	0.0492673	0.100807
TIPIN	protein_coding	ENSG00000075131	-0.308377	4.74749	6.80334e-05	0.000304425
SRI	protein_coding	ENSG00000075142	-0.273241	5.78106	0.000134353	0.000563298
EIF4G3	protein_coding	ENSG00000075151	0.629587	5.88456	2.78109e-21	9.20165e-20
NUP37	protein_coding	ENSG00000075188	0.183151	4.68059	0.0155359	0.0379258
SEMA3A	protein_coding	ENSG00000075213	-0.035539	3.53158	0.675984	0.783638
GTSE1	protein_coding	ENSG00000075218	1.15	7.54686	8.12204e-70	2.60847e-67
SEMA3C	protein_coding	ENSG00000075223	0.832815	6.63328	5.34521e-36	4.40925e-34
TTC38	protein_coding	ENSG00000075234	0.375225	4.17997	1.34317e-06	8.19893e-06
ACAT1	protein_coding	ENSG00000075239	-0.165319	5.67552	0.0243518	0.0556193
GRAMD4	protein_coding	ENSG00000075240	-0.270496	3.82785	0.00181655	0.00585041
CELSR1	protein_coding	ENSG00000075275	-0.376546	-0.741246	0.114582	0.201488
ZNF638	protein_coding	ENSG00000075292	0.541972	7.49714	9.91873e-16	1.94238e-14
SLC25A40	protein_coding	ENSG00000075303	-0.080852	4.20759	0.341635	0.475636
TIMM21	protein_coding	ENSG00000075336	0.310674	5.817	5.97196e-06	3.2471e-05
ADD2	protein_coding	ENSG00000075340	0.69638	3.58706	3.49288e-13	5.26819e-12
FGF4	protein_coding	ENSG00000075388	-1.08191	-2.31672	0.00803546	0.0215439
RASAL2	protein_coding	ENSG00000075391	0.00940152	6.19099	0.88773	0.94243
VPS9D1	protein_coding	ENSG00000075399	0.306743	4.25575	0.00789036	0.0212139
ZNF37A	protein_coding	ENSG00000075407	0.275426	5.78593	6.60444e-05	0.00029602
MARK3	protein_coding	ENSG00000075413	0.503531	5.91745	1.40874e-14	2.43397e-13
SLC25A3	protein_coding	ENSG00000075415	-0.0910312	7.86206	0.156479	0.259438
FNDC3B	protein_coding	ENSG00000075420	0.414477	6.97488	3.06763e-09	2.82103e-08
FOSL2	protein_coding	ENSG00000075426	-0.547839	8.21848	1.04546e-16	2.25644e-15
CACNG5	protein_coding	ENSG00000075429	0.190525	-2.96591	0.917611	0.962694
[truncated: 22,882 more rows]

## Sheet: G2_vs_M
gene_names	bio_type	ensemble_id	logFC	logCPM	PValue	FDR
[truncated: 24,087 more rows]

[truncated: 1 more sheets: M_vs_G1]
