# Supplementary material for: The S-phase-induced lncRNA SUNO1 promotes cell proliferation by controlling YAP1/Hippo signaling pathway
Source: eLife. 2020 Oct 27;9:e55102. doi: 10.7554/eLife.55102 (PMC7591261; doi:10.7554/eLife.55102)
Supplement: Supplementary file 3. — File three is a subset of File two and it includes only DEGs information. The gene categories are also provided as individual sheets. Statistics summarizing the categorization of each comparison (between two phases) is listed in Figure 1B. [file elife-55102-supp3.xlsx]

## Sheet: G1_vs_G1S
gene_names	bio_type	ensemble_id	logFC	logCPM	PValue	FDR
DPM1	protein_coding	ENSG00000000419	-1.29449	6.761	1.33004e-44	1.74112e-43
C1orf112	protein_coding	ENSG00000000460	1.29249	4.61937	5.07271e-61	1.089e-59
CFH	protein_coding	ENSG00000000971	0.920815	0.477974	3.41602e-07	8.64847e-07
ENPP4	protein_coding	ENSG00000001561	0.974079	4.3141	1.29718e-37	1.32732e-36
ANKIB1	protein_coding	ENSG00000001629	-0.748616	6.66289	7.75452e-29	5.72252e-28
LAP3	protein_coding	ENSG00000002549	-0.791315	6.18588	5.68822e-30	4.3718e-29
HECW1	protein_coding	ENSG00000002746	0.967412	1.58204	5.90019e-13	2.14033e-12
LASP1	protein_coding	ENSG00000002834	-0.782068	9.40078	2.0018e-32	1.69124e-31
TMEM176A	protein_coding	ENSG00000002933	0.793882	-0.433026	0.00268054	0.00468346
M6PR	protein_coding	ENSG00000003056	-0.640224	8.0521	6.10049e-22	3.40145e-21
KLHL13	protein_coding	ENSG00000003096	0.945153	2.30993	8.35961e-18	3.91214e-17
CYP26B1	protein_coding	ENSG00000003137	0.675003	5.0286	9.42573e-23	5.42762e-22
ICA1	protein_coding	ENSG00000003147	1.56846	0.247671	1.66509e-14	6.59438e-14
CASP10	protein_coding	ENSG00000003400	2.86224	0.358882	3.66344e-41	4.25875e-40
TFPI	protein_coding	ENSG00000003436	-0.613197	5.40839	2.03601e-19	1.02468e-18
SLC7A2	protein_coding	ENSG00000003989	0.659601	5.86518	2.705e-23	1.58993e-22
SARM1	protein_coding	ENSG00000004139	-2.07665	1.28884	1.81666e-42	2.21783e-41
POLDIP2	protein_coding	ENSG00000004142	-0.595357	7.00228	1.77964e-20	9.33292e-20
PLXND1	protein_coding	ENSG00000004399	0.717902	6.87516	2.81246e-23	1.65229e-22
AK2	protein_coding	ENSG00000004455	-0.656134	7.68593	5.33285e-24	3.23884e-23
FKBP4	protein_coding	ENSG00000004478	-1.03203	8.87506	9.26066e-58	1.78735e-56
KDM1A	protein_coding	ENSG00000004487	-0.599779	7.32299	9.48116e-21	5.02581e-20
ARHGAP33	protein_coding	ENSG00000004777	2.44693	3.60313	1.63685e-111	1.24768e-109
NDUFAB1	protein_coding	ENSG00000004779	-0.731866	5.31689	3.18041e-24	1.95027e-23
PDK4	protein_coding	ENSG00000004799	-1.25407	-0.338028	2.54354e-07	6.49901e-07
ABCB5	protein_coding	ENSG00000004846	2.50982	-1.98398	2.47028e-09	7.2625e-09
CALCR	protein_coding	ENSG00000004948	-1.64221	-2.20808	0.000370413	0.000718244
HCCS	protein_coding	ENSG00000004961	-0.719095	4.52653	7.09747e-23	4.10263e-22
HOXA11	protein_coding	ENSG00000005073	-0.759222	3.85176	3.4293e-21	1.85288e-20
DHX33	protein_coding	ENSG00000005100	-0.715212	6.30048	9.41779e-27	6.38644e-26
THSD7A	protein_coding	ENSG00000005108	3.09405	-2.42918	2.54099e-08	6.95668e-08
RPAP3	protein_coding	ENSG00000005175	-0.732571	6.43705	1.6235e-25	1.04756e-24
ACSM3	protein_coding	ENSG00000005187	1.32927	0.490349	2.46249e-12	8.61663e-12
REXO5	protein_coding	ENSG00000005189	0.946457	3.13622	1.40145e-23	8.34532e-23
SPPL2B	protein_coding	ENSG00000005206	1.46503	3.9836	3.45849e-14	1.34211e-13
COPZ2	protein_coding	ENSG00000005243	1.09792	2.92543	5.05607e-28	3.60846e-27
MSL3	protein_coding	ENSG00000005302	-0.665086	5.25838	1.87853e-21	1.02604e-20
CREBBP	protein_coding	ENSG00000005339	-1.1279	7.54064	1.01745e-57	1.95746e-56
TSPOAP1	protein_coding	ENSG00000005379	2.50696	0.25538	4.50965e-21	2.42626e-20
CROT	protein_coding	ENSG00000005469	1.29523	2.59327	6.56152e-34	5.87974e-33
ABCB4	protein_coding	ENSG00000005471	0.832441	2.25998	3.89019e-13	1.42601e-12
KMT2E	protein_coding	ENSG00000005483	-0.852918	5.87571	1.42799e-34	1.31584e-33
ITGA3	protein_coding	ENSG00000005884	-0.924278	9.70144	1.25019e-45	1.70132e-44
ZFX	protein_coding	ENSG00000005889	-0.846678	4.53295	1.85687e-28	1.34718e-27
ITGA2B	protein_coding	ENSG00000005961	2.53355	-1.10513	1.52755e-13	5.72491e-13
REX1BD	protein_coding	ENSG00000006015	0.680301	4.14546	1.24528e-16	5.49962e-16
CRLF1	protein_coding	ENSG00000006016	1.20406	2.58653	5.16618e-19	2.55257e-18
OSBPL7	protein_coding	ENSG00000006025	1.18835	3.68297	1.95458e-31	1.58518e-30
TMEM98	protein_coding	ENSG00000006042	0.808079	6.03336	7.64865e-34	6.82598e-33
ABCC8	protein_coding	ENSG00000006071	2.30461	0.837843	7.23772e-40	8.02278e-39
TMEM132A	protein_coding	ENSG00000006118	0.632699	6.40153	9.11241e-19	4.45576e-18
ZNF263	protein_coding	ENSG00000006194	-1.21306	5.78633	1.10931e-72	3.29875e-71
CX3CL1	protein_coding	ENSG00000006210	-1.02696	3.53064	5.72228e-31	4.54893e-30
SPATA20	protein_coding	ENSG00000006282	0.710536	6.25095	1.7142e-27	1.19994e-26
RALA	protein_coding	ENSG00000006451	-0.742164	6.43652	3.67162e-26	2.43029e-25
ETV1	protein_coding	ENSG00000006468	-0.99935	1.65894	5.64034e-16	2.40799e-15
ALDH3B1	protein_coding	ENSG00000006534	1.07326	4.72913	7.83084e-46	1.07599e-44
CCL26	protein_coding	ENSG00000006606	1.08976	2.10463	1.25335e-18	6.09393e-18
USH1C	protein_coding	ENSG00000006611	0.846254	-0.215744	9.68403e-05	0.000199044
TBXA2R	protein_coding	ENSG00000006638	0.904167	0.245965	5.15782e-06	1.19126e-05
IFRD1	protein_coding	ENSG00000006652	-0.946725	5.47057	1.61173e-41	1.89837e-40
COX10	protein_coding	ENSG00000006695	-0.986314	3.91915	4.19518e-32	3.49651e-31
ARHGAP44	protein_coding	ENSG00000006740	1.43817	2.67151	6.79148e-42	8.09433e-41
CDKL3	protein_coding	ENSG00000006837	-0.757292	0.518837	2.43685e-05	5.30805e-05
CCDC124	protein_coding	ENSG00000007080	-0.628425	6.30495	2.12016e-19	1.06614e-18
CEACAM21	protein_coding	ENSG00000007129	1.59774	-3.38272	0.025778	0.0390242
NOS2	protein_coding	ENSG00000007171	1.57428	1.41939	1.11926e-30	8.8103e-30
SLC13A2	protein_coding	ENSG00000007216	-5.09465	-2.53722	0.00916194	0.0148449
GAS7	protein_coding	ENSG00000007237	0.936239	2.8222	1.55997e-19	7.89059e-19
TRAPPC6A	protein_coding	ENSG00000007255	0.874568	1.45561	5.21195e-10	1.59578e-09
MATK	protein_coding	ENSG00000007264	0.872638	-0.00383931	0.000178944	0.000358439
RHBDF1	protein_coding	ENSG00000007384	2.14964	5.02066	7.07145e-171	1.54845e-168
CACNA2D2	protein_coding	ENSG00000007402	0.81377	1.58936	7.41403e-09	2.10617e-08
BAIAP3	protein_coding	ENSG00000007516	2.55254	2.13494	1.34977e-73	4.0793e-72
TSR3	protein_coding	ENSG00000007520	-0.602688	5.94947	1.9265e-19	9.70991e-19
PIGQ	protein_coding	ENSG00000007541	0.85384	4.02233	8.50405e-22	4.71431e-21
TEAD3	protein_coding	ENSG00000007866	1.02961	5.58917	4.88786e-52	7.90691e-51
MYLIP	protein_coding	ENSG00000007944	-1.21325	3.52973	1.50951e-42	1.84942e-41
E2F2	protein_coding	ENSG00000007968	0.852982	3.79886	6.50475e-24	3.93076e-23
PSMB1	protein_coding	ENSG00000008018	-0.759243	7.23636	1.2589e-28	9.20278e-28
SYN1	protein_coding	ENSG00000008056	-0.972066	2.22943	4.31716e-14	1.66566e-13
JARID2	protein_coding	ENSG00000008083	-1.75625	5.74578	3.77017e-137	4.7298e-135
CAMK1G	protein_coding	ENSG00000008118	2.51713	-3.00617	9.10739e-05	0.000187704
DLEC1	protein_coding	ENSG00000008226	3.20137	-3.42773	0.00521861	0.00877123
ADAM22	protein_coding	ENSG00000008277	1.06731	2.90196	2.24305e-24	1.38393e-23
SYPL1	protein_coding	ENSG00000008282	-0.73506	6.72751	1.09902e-28	8.05599e-28
SPAG9	protein_coding	ENSG00000008294	-1.63256	7.30539	6.33899e-131	7.06886e-129
CELSR3	protein_coding	ENSG00000008300	1.17493	5.49078	1.84556e-57	3.51971e-56
SS18L2	protein_coding	ENSG00000008324	-0.717142	3.70079	2.76273e-16	1.19773e-15
MMP25	protein_coding	ENSG00000008516	-1.09013	0.325827	1.14243e-06	2.78209e-06
PKD1	protein_coding	ENSG00000008710	1.08717	6.34893	1.00302e-51	1.60957e-50
SEC62	protein_coding	ENSG00000008952	-1.07383	7.19744	3.07837e-61	6.6382e-60
CSDE1	protein_coding	ENSG00000009307	-1.09003	10.0499	7.21411e-57	1.34912e-55
TENM1	protein_coding	ENSG00000009694	1.42844	-0.531615	5.40511e-07	1.34622e-06
PAX7	protein_coding	ENSG00000009709	0.598986	2.81771	3.37014e-09	9.8241e-09
MASP2	protein_coding	ENSG00000009724	-1.83679	-2.89608	0.000620511	0.00117336
IYD	protein_coding	ENSG00000009765	3.41823	-3.34163	0.00171544	0.00306959
VTA1	protein_coding	ENSG00000009844	-0.926722	6.66543	1.87256e-39	2.04462e-38
MLXIPL	protein_coding	ENSG00000009950	3.34763	-2.04446	4.29333e-11	1.40393e-10
SPRTN	protein_coding	ENSG00000010072	-0.603104	4.87826	2.71387e-17	1.23828e-16
METTL13	protein_coding	ENSG00000010165	-0.938602	6.02527	1.59923e-44	2.0867e-43
ZNF207	protein_coding	ENSG00000010244	-0.730639	7.37053	9.17212e-31	7.24595e-30
PHF7	protein_coding	ENSG00000010318	1.00817	3.15796	1.95496e-26	1.30803e-25
SEMA3G	protein_coding	ENSG00000010319	2.22494	3.34781	2.76731e-103	1.73133e-101
NISCH	protein_coding	ENSG00000010322	0.84581	6.26182	3.6528e-36	3.56358e-35
SLC6A13	protein_coding	ENSG00000010379	1.08117	-0.797951	0.000273168	0.000537345
ZNF200	protein_coding	ENSG00000010539	-0.714875	4.64488	3.17618e-22	1.79546e-21
CD4	protein_coding	ENSG00000010610	1.70327	-3.13694	0.0101509	0.0163428
BTK	protein_coding	ENSG00000010671	-1.92875	-2.64271	8.86232e-06	2.00495e-05
HIVEP2	protein_coding	ENSG00000010818	-1.14683	5.87888	1.28522e-56	2.36857e-55
ELOA	protein_coding	ENSG00000011007	-1.53211	7.29971	8.82702e-118	7.59345e-116
CLCN6	protein_coding	ENSG00000011021	0.982953	5.34485	9.49383e-43	1.17031e-41
MRC2	protein_coding	ENSG00000011028	0.90864	8.97056	4.77381e-42	5.70938e-41
BTBD7	protein_coding	ENSG00000011114	-0.661302	5.50461	1.09626e-21	6.04801e-21
AKAP8L	protein_coding	ENSG00000011243	-0.754554	5.70055	3.47897e-30	2.69014e-29
MBTD1	protein_coding	ENSG00000011258	-0.680336	4.28751	2.69732e-17	1.23143e-16
UTP18	protein_coding	ENSG00000011260	-1.10267	6.06744	6.75543e-60	1.38838e-58
DPF1	protein_coding	ENSG00000011332	0.636488	2.86281	2.88964e-09	8.45617e-09
PLAUR	protein_coding	ENSG00000011422	-0.805476	7.14705	3.66106e-30	2.82822e-29
ANLN	protein_coding	ENSG00000011426	0.673963	9.29964	3.49474e-22	1.96953e-21
CEP68	protein_coding	ENSG00000011523	1.36494	4.3686	1.18008e-68	3.16885e-67
TMEM159	protein_coding	ENSG00000011638	0.605738	2.9614	1.30397e-10	4.14528e-10
BRCA1	protein_coding	ENSG00000012048	1.21247	6.47424	2.75344e-72	8.11776e-71
ERCC1	protein_coding	ENSG00000012061	-0.587586	6.70209	2.4459e-19	1.2256e-18
SEMA3B	protein_coding	ENSG00000012171	0.935805	4.63985	9.30174e-35	8.61735e-34
LTF	protein_coding	ENSG00000012223	1.28559	0.0117808	1.46032e-08	4.06596e-08
EXTL3	protein_coding	ENSG00000012232	-0.66978	7.14473	3.14219e-25	2.00228e-24
ALOX5	protein_coding	ENSG00000012779	2.09202	4.42731	4.55685e-150	7.3665e-148
CALCOCO1	protein_coding	ENSG00000012822	0.743587	5.11357	3.32702e-26	2.20523e-25
MAP4K5	protein_coding	ENSG00000012983	-0.653399	6.73391	3.24555e-22	1.83296e-21
EHD3	protein_coding	ENSG00000013016	-0.602837	4.65703	2.52735e-16	1.09786e-15
PSMC4	protein_coding	ENSG00000013275	-0.778641	6.64313	2.07505e-34	1.89684e-33
NUB1	protein_coding	ENSG00000013374	-0.597478	4.75147	9.26822e-16	3.91793e-15
RWDD2A	protein_coding	ENSG00000013392	1.1912	1.55312	2.6295e-20	1.36678e-19
POLR3B	protein_coding	ENSG00000013503	-0.697862	4.51394	7.24596e-19	3.55828e-18
ANGEL1	protein_coding	ENSG00000013523	0.780006	4.23739	7.92637e-24	4.77068e-23
DNASE1L1	protein_coding	ENSG00000013563	0.771075	5.01925	1.48392e-27	1.04056e-26
HEBP1	protein_coding	ENSG00000013583	0.796751	4.46701	7.89481e-24	4.75287e-23
MAMLD1	protein_coding	ENSG00000013619	-1.10245	4.55973	1.30774e-37	1.337e-36
TACC3	protein_coding	ENSG00000013810	1.11533	7.31776	1.1638e-62	2.61987e-61
POLA2	protein_coding	ENSG00000014138	1.93904	2.05988	9.45946e-58	1.82426e-56
MTMR11	protein_coding	ENSG00000014914	1.09188	3.9699	6.0036e-40	6.68247e-39
CCDC88C	protein_coding	ENSG00000015133	-2.04495	-0.433151	1.34598e-11	4.53055e-11
YAF2	protein_coding	ENSG00000015153	-0.738475	4.14287	1.57988e-21	8.66453e-21
ZMYND11	protein_coding	ENSG00000015171	-0.608386	5.28371	1.02493e-16	4.54564e-16
NPC1L1	protein_coding	ENSG00000015520	-2.92299	-2.82899	1.0395e-06	2.54145e-06
XYLT2	protein_coding	ENSG00000015532	0.594325	5.64318	2.23864e-18	1.07866e-17
CHDH	protein_coding	ENSG00000016391	1.8736	1.22358	1.2519e-33	1.10944e-32
SLC38A5	protein_coding	ENSG00000017483	1.18816	0.115614	2.12055e-07	5.44481e-07
CNTN1	protein_coding	ENSG00000018236	-0.617083	4.03481	4.90243e-13	1.78754e-12
SLC11A1	protein_coding	ENSG00000018280	2.68905	-2.62813	2.97328e-06	7.00004e-06
WWTR1	protein_coding	ENSG00000018408	-1.04515	6.01185	1.4097e-51	2.24871e-50
CXorf56	protein_coding	ENSG00000018610	-0.906043	3.87713	5.86531e-26	3.85163e-25
ATP1A2	protein_coding	ENSG00000018625	3.81165	1.33371	2.45275e-110	1.79573e-108
TTC27	protein_coding	ENSG00000018699	-1.49511	5.11253	4.83923e-91	2.37883e-89
ZNF582	protein_coding	ENSG00000018869	-1.01565	1.88499	1.15882e-15	4.86876e-15
PHLDB1	protein_coding	ENSG00000019144	0.789774	6.98021	6.89582e-35	6.42304e-34
MARCO	protein_coding	ENSG00000019169	1.11126	4.08164	1.74116e-30	1.363e-29
CYP24A1	protein_coding	ENSG00000019186	1.16327	5.9735	8.90695e-54	1.51406e-52
PRDM11	protein_coding	ENSG00000019485	1.15357	4.26309	1.73498e-50	2.69269e-49
SYT13	protein_coding	ENSG00000019505	0.928519	0.28468	0.000253011	0.000499081
SNAI2	protein_coding	ENSG00000019549	-1.76641	4.79819	5.59374e-125	5.59072e-123
HGF	protein_coding	ENSG00000019991	-1.85762	-3.3084	0.00186857	0.00332631
ADGRA2	protein_coding	ENSG00000020181	1.1609	4.42102	4.50221e-47	6.39415e-46
RUNX3	protein_coding	ENSG00000020633	-1.25329	3.97168	2.64088e-52	4.31554e-51
SLC7A9	protein_coding	ENSG00000021488	2.05215	-2.19627	0.000514484	0.000982274
NRXN3	protein_coding	ENSG00000021645	2.39285	4.62206	2.75493e-194	8.61791e-192
OSBPL5	protein_coding	ENSG00000021762	1.32333	4.52371	2.62735e-64	6.18017e-63
AQR	protein_coding	ENSG00000021776	-0.640937	5.91656	1.83869e-21	1.00473e-20
RTF2	protein_coding	ENSG00000022277	-0.924059	6.39692	3.574e-36	3.49095e-35
GABRA1	protein_coding	ENSG00000022355	-2.13248	1.00246	3.47648e-48	5.06582e-47
RNF10	protein_coding	ENSG00000022840	-0.70556	6.90845	9.23332e-29	6.78886e-28
ZNF839	protein_coding	ENSG00000022976	0.738987	2.52576	5.46417e-10	1.67152e-09
GRAMD1B	protein_coding	ENSG00000023171	-1.75329	5.09361	1.10393e-122	1.05517e-120
RB1CC1	protein_coding	ENSG00000023287	-0.966301	6.6893	5.06607e-42	6.0529e-41
BIRC3	protein_coding	ENSG00000023445	-4.42758	5.58688	2.67521e-60	5.57904e-59
SNAPC1	protein_coding	ENSG00000023608	1.07841	7.0084	1.11053e-37	1.13827e-36
DERA	protein_coding	ENSG00000023697	0.688912	4.65567	4.83694e-21	2.59887e-20
STRAP	protein_coding	ENSG00000023734	-1.30224	7.8815	1.62583e-74	5.04006e-73
EHD2	protein_coding	ENSG00000024422	1.01539	4.87149	5.18989e-40	5.80626e-39
RRAGD	protein_coding	ENSG00000025039	1.08988	3.87874	1.72766e-40	1.96479e-39
TYMP	protein_coding	ENSG00000025708	1.04535	-0.996414	0.000220932	0.000438496
TOMM34	protein_coding	ENSG00000025772	-0.76606	7.23741	2.17514e-31	1.75933e-30
SEC63	protein_coding	ENSG00000025796	-0.742984	6.97123	1.3909e-28	1.01492e-27
VIM	protein_coding	ENSG00000026025	-0.947272	11.2616	3.95955e-47	5.63342e-46
RTEL1-TNFRSF6B	protein_coding	ENSG00000026036	1.94014	0.252899	6.96957e-17	3.11921e-16
RNASET2	protein_coding	ENSG00000026297	0.935841	2.92161	7.51859e-17	3.35931e-16
CD44	protein_coding	ENSG00000026508	-1.13234	8.60747	4.97092e-70	1.36683e-68
SLAMF7	protein_coding	ENSG00000026751	0.71056	3.84225	1.92205e-17	8.84024e-17
BTN3A1	protein_coding	ENSG00000026950	1.47739	1.99396	2.93139e-33	2.5592e-32
TNFRSF1B	protein_coding	ENSG00000028137	1.65618	-1.2793	7.0791e-06	1.61533e-05
POU2F2	protein_coding	ENSG00000028277	-1.87179	4.35295	3.42198e-114	2.79407e-112
BRD9	protein_coding	ENSG00000028310	-1.04488	5.86177	2.86364e-55	5.08302e-54
ARNTL2	protein_coding	ENSG00000029153	0.676606	5.86568	4.87942e-24	2.9717e-23
BCLAF1	protein_coding	ENSG00000029363	-1.6309	8.2726	2.51641e-122	2.39577e-120
ANK1	protein_coding	ENSG00000029534	0.911723	1.93025	1.26066e-12	4.48864e-12
HMGB3	protein_coding	ENSG00000029993	-1.04594	6.18817	3.58495e-50	5.50354e-49
NUP160	protein_coding	ENSG00000030066	-0.646786	6.81762	4.89913e-23	2.85313e-22
BAK1	protein_coding	ENSG00000030110	-0.681577	5.62089	4.59186e-21	2.46884e-20
IKZF2	protein_coding	ENSG00000030419	0.815949	2.9963	9.2327e-18	4.31068e-17
CENPQ	protein_coding	ENSG00000031691	0.633786	3.76169	1.07388e-11	3.63143e-11
ABCF2	protein_coding	ENSG00000033050	-0.880209	3.07729	4.94806e-19	2.44731e-18
CHPF2	protein_coding	ENSG00000033100	-0.937732	4.01807	1.12668e-31	9.23073e-31
LRRC7	protein_coding	ENSG00000033122	1.61881	-0.186323	2.6246e-14	1.02711e-13
GAB2	protein_coding	ENSG00000033327	0.676113	4.5145	3.31852e-19	1.65253e-18
ATP6V0A1	protein_coding	ENSG00000033627	1.15104	-0.140471	7.0229e-08	1.86918e-07
MAP2K3	protein_coding	ENSG00000034152	-1.97341	6.92867	1.91178e-159	3.71363e-157
SH3YL1	protein_coding	ENSG00000035115	-0.931531	2.21966	4.14334e-16	1.77771e-15
DAPK2	protein_coding	ENSG00000035664	1.84418	1.61345	3.07308e-34	2.7922e-33
TIMP2	protein_coding	ENSG00000035862	0.625138	7.92251	1.1154e-20	5.90088e-20
TBC1D23	protein_coding	ENSG00000036054	-0.673964	5.88452	1.47187e-22	8.40717e-22
CUL3	protein_coding	ENSG00000036257	-1.34712	7.06685	4.6996e-90	2.25048e-88
AC118549.1	protein_coding	ENSG00000036549	-0.637398	6.19526	5.58849e-20	2.87505e-19
USP2	protein_coding	ENSG00000036672	2.08587	-0.841947	1.97652e-14	7.7957e-14
TUBG2	protein_coding	ENSG00000037042	0.864791	2.03306	2.7969e-13	1.03358e-12
RPL26L1	protein_coding	ENSG00000037241	-0.739555	4.93075	1.65108e-17	7.62015e-17
FLT4	protein_coding	ENSG00000037280	1.25494	4.3258	2.79601e-57	5.29461e-56
NSUN2	protein_coding	ENSG00000037474	-1.04734	7.93566	3.67842e-57	6.95463e-56
FBXO42	protein_coding	ENSG00000037637	1.12754	3.93608	5.73493e-41	6.61893e-40
MRI1	protein_coding	ENSG00000037757	0.710431	4.03435	7.97526e-20	4.07164e-19
HOXC8	protein_coding	ENSG00000037965	-0.966213	3.90411	1.30582e-32	1.11497e-31
PI4K2B	protein_coding	ENSG00000038210	1.01701	2.3658	5.07757e-18	2.40518e-17
BOD1L1	protein_coding	ENSG00000038219	-1.06182	6.6629	4.67415e-36	4.54344e-35
MAT2B	protein_coding	ENSG00000038274	-0.594446	5.45614	4.87612e-19	2.41321e-18
TLL1	protein_coding	ENSG00000038295	1.18253	-0.0342589	2.19267e-07	5.62278e-07
TRIO	protein_coding	ENSG00000038382	-0.708364	8.49665	2.50096e-26	1.66503e-25
VCAN	protein_coding	ENSG00000038427	-1.18963	-0.959072	0.000150001	0.000302298
MSR1	protein_coding	ENSG00000038945	2.37676	-2.64257	0.000298679	0.000584902
CDH1	protein_coding	ENSG00000039068	2.98469	2.5409	2.85398e-112	2.21041e-110
MTREX	protein_coding	ENSG00000039123	-0.833778	6.9263	2.37624e-33	2.08436e-32
DNAH5	protein_coding	ENSG00000039139	1.06946	1.59474	7.59431e-12	2.58989e-11
ZFYVE16	protein_coding	ENSG00000039319	0.599403	5.76633	1.15314e-17	5.35902e-17
BEST2	protein_coding	ENSG00000039987	-1.15973	-1.97014	0.00744898	0.0122356
PQLC2	protein_coding	ENSG00000040487	0.974493	3.94647	1.72035e-29	1.29941e-28
RTN4R	protein_coding	ENSG00000040608	1.74372	3.87565	5.62341e-77	1.84287e-75
PHF23	protein_coding	ENSG00000040633	-0.683173	5.66507	6.02911e-24	3.6525e-23
CDH10	protein_coding	ENSG00000040731	1.07013	0.187035	0.014218	0.0224129
INPP4A	protein_coding	ENSG00000040933	0.667256	5.71068	3.55037e-23	2.07668e-22
PSMA4	protein_coding	ENSG00000041357	-0.703142	7.58389	1.50533e-25	9.72086e-25
MYO16	protein_coding	ENSG00000041515	1.28413	1.86192	3.41442e-24	2.09163e-23
LSG1	protein_coding	ENSG00000041802	-0.912991	6.79371	5.5119e-46	7.61268e-45
PARP3	protein_coding	ENSG00000041880	1.01464	4.34459	1.30832e-36	1.29472e-35
TNC	protein_coding	ENSG00000041982	-1.10665	8.97666	8.03248e-61	1.71068e-59
SPATA7	protein_coding	ENSG00000042317	0.666482	2.45606	2.68723e-09	7.88396e-09
RETSAT	protein_coding	ENSG00000042445	0.844909	5.02715	1.96073e-32	1.65887e-31
CAPG	protein_coding	ENSG00000042493	0.896817	4.71049	3.47855e-32	2.90729e-31
TG	protein_coding	ENSG00000042832	1.24657	-1.37464	0.00140998	0.00254474
ADAM28	protein_coding	ENSG00000042980	3.81137	-0.0735512	2.08545e-37	2.11682e-36
BARX2	protein_coding	ENSG00000043039	-1.72699	-1.03812	2.0597e-09	6.08887e-09
TRIT1	protein_coding	ENSG00000043514	-0.728419	4.82673	8.48875e-22	4.70692e-21
CTNNA1	protein_coding	ENSG00000044115	-1.07579	8.42564	9.96154e-60	2.04034e-58
CNTLN	protein_coding	ENSG00000044459	1.19623	3.14633	3.5806e-34	3.23989e-33
EPHA3	protein_coding	ENSG00000044524	2.29607	-2.35966	3.33079e-06	7.80815e-06
HSPA5	protein_coding	ENSG00000044574	-0.72186	9.9181	6.67925e-27	4.55759e-26
GEMIN8	protein_coding	ENSG00000046647	-0.656903	1.00551	1.3781e-05	3.0673e-05
PREX2	protein_coding	ENSG00000046889	1.40958	0.313221	2.2718e-11	7.555e-11
CTPS2	protein_coding	ENSG00000047230	1.11438	2.33257	9.42223e-24	5.65263e-23
XK	protein_coding	ENSG00000047597	1.09327	1.43212	3.41428e-13	1.25568e-12
ANO2	protein_coding	ENSG00000047617	1.03755	5.59896	6.10255e-52	9.84543e-51
ARHGAP6	protein_coding	ENSG00000047648	1.63404	0.796204	1.77073e-19	8.93975e-19
GOPC	protein_coding	ENSG00000047932	1.09893	5.65619	9.54212e-52	1.53227e-50
ROS1	protein_coding	ENSG00000047936	1.83547	3.86956	1.45278e-73	4.37961e-72
HDAC9	protein_coding	ENSG00000048052	-1.44383	5.3146	8.50972e-85	3.53403e-83
NOP16	protein_coding	ENSG00000048162	-1.0224	5.89425	3.47105e-50	5.34183e-49
CC2D2A	protein_coding	ENSG00000048342	-0.646133	4.2704	1.15867e-16	5.12467e-16
SNX29	protein_coding	ENSG00000048471	1.42218	3.57808	1.83428e-51	2.91633e-50
FAM120A	protein_coding	ENSG00000048828	-0.613018	7.69632	1.55468e-21	8.53018e-21
COL9A2	protein_coding	ENSG00000049089	1.01351	4.52962	2.43509e-38	2.56131e-37
KITLG	protein_coding	ENSG00000049130	-1.38478	5.25265	1.44925e-63	3.3501e-62
ADAMTS6	protein_coding	ENSG00000049192	-0.63503	6.13186	9.3076e-18	4.34481e-17
H6PD	protein_coding	ENSG00000049239	1.0078	4.91852	1.60094e-36	1.57976e-35
EPN3	protein_coding	ENSG00000049283	2.50446	-0.427053	5.61583e-26	3.69082e-25
LTBP1	protein_coding	ENSG00000049323	0.7947	7.01609	1.75157e-31	1.42582e-30
NEDD4L	protein_coding	ENSG00000049759	-1.59856	7.27272	1.36323e-129	1.4858e-127
PTCD2	protein_coding	ENSG00000049883	-0.685083	4.26038	2.90599e-19	1.4507e-18
NEXMIF	protein_coding	ENSG00000050030	2.89503	0.0698142	2.23137e-37	2.26208e-36
ARHGEF5	protein_coding	ENSG00000050327	0.868164	-0.519859	0.000480202	0.000919664
LETMD1	protein_coding	ENSG00000050426	1.03545	4.85094	1.47509e-43	1.85926e-42
SLC4A8	protein_coding	ENSG00000050438	-0.768991	4.20094	1.10618e-19	5.62358e-19
PTGER3	protein_coding	ENSG00000050628	0.879061	-1.53768	0.00453357	0.00768203
POLQ	protein_coding	ENSG00000051341	2.01584	6.25189	2.11642e-190	6.21686e-188
CYBA	protein_coding	ENSG00000051523	3.73896	-1.74717	1.5825e-16	6.94309e-16
PRSS8	protein_coding	ENSG00000052344	2.44838	-0.924403	2.4548e-14	9.6395e-14
RRP12	protein_coding	ENSG00000052749	-1.24306	6.7664	3.46203e-78	1.17616e-76
FNIP2	protein_coding	ENSG00000052795	0.740484	4.15846	3.70468e-20	1.91573e-19
MSMO1	protein_coding	ENSG00000052802	1.08742	6.47579	1.20578e-51	1.92981e-50
ALX4	protein_coding	ENSG00000052850	1.87789	-0.839029	1.31511e-12	4.67422e-12
FSTL4	protein_coding	ENSG00000053108	0.718147	-0.81303	0.00429621	0.00730604
FOXN3	protein_coding	ENSG00000053254	0.827965	6.16168	2.40774e-31	1.94484e-30
AKR7A2	protein_coding	ENSG00000053371	0.867831	5.02047	4.76229e-35	4.46166e-34
MRTO4	protein_coding	ENSG00000053372	-1.4095	6.76038	1.80221e-92	9.25581e-91
USE1	protein_coding	ENSG00000053501	-0.629376	2.78842	1.28204e-09	3.8337e-09
MCF2L2	protein_coding	ENSG00000053524	2.03784	1.11775	3.28658e-35	3.08993e-34
LAMA3	protein_coding	ENSG00000053747	1.08568	4.1634	6.84797e-28	4.85853e-27
KCNQ1	protein_coding	ENSG00000053918	1.26895	-2.85541	0.0216826	0.0332274
THRAP3	protein_coding	ENSG00000054118	-0.889713	8.38184	5.72157e-40	6.38626e-39
PHPT1	protein_coding	ENSG00000054148	0.62092	5.22515	1.13278e-17	5.26745e-17
ARID4B	protein_coding	ENSG00000054267	-0.953588	5.8281	1.5869e-41	1.87005e-40
OPN3	protein_coding	ENSG00000054277	-2.2298	-0.136459	1.47061e-20	7.73252e-20
SDCCAG8	protein_coding	ENSG00000054282	0.942892	3.19009	5.12347e-22	2.86531e-21
HHAT	protein_coding	ENSG00000054392	0.935734	5.15867	2.95587e-36	2.8907e-35
FOXC1	protein_coding	ENSG00000054598	-1.27461	4.14017	1.15692e-56	2.14031e-55
SYNE2	protein_coding	ENSG00000054654	2.16302	6.85267	1.82794e-56	3.35848e-55
PLEKHH1	protein_coding	ENSG00000054690	2.28588	4.40009	4.89383e-172	1.12264e-169
ATP9A	protein_coding	ENSG00000054793	0.765056	5.47647	5.45854e-30	4.19795e-29
NOP58	protein_coding	ENSG00000055044	-1.70807	7.79746	1.4499e-132	1.67903e-130
SZRD1	protein_coding	ENSG00000055070	-0.597535	7.75458	9.57639e-20	4.87976e-19
KCNH2	protein_coding	ENSG00000055118	1.02162	2.22447	1.73659e-19	8.77107e-19
CYFIP2	protein_coding	ENSG00000055163	0.916828	5.86222	1.31106e-41	1.55029e-40
TAB2	protein_coding	ENSG00000055208	-0.859229	7.25717	1.35889e-38	1.44511e-37
USP36	protein_coding	ENSG00000055483	-1.46239	7.25979	1.18471e-107	8.22364e-106
CCDC85A	protein_coding	ENSG00000055813	0.868443	2.03679	3.14247e-14	1.22302e-13
MRPL43	protein_coding	ENSG00000055950	-0.729992	5.34669	7.96165e-27	5.41424e-26
ZFR	protein_coding	ENSG00000056097	-1.07304	8.02768	1.33573e-48	1.96661e-47
TRAF1	protein_coding	ENSG00000056558	-3.02901	3.75293	7.01214e-65	1.67727e-63
IL17RB	protein_coding	ENSG00000056736	2.3498	1.73245	1.9372e-64	4.56123e-63
PKP2	protein_coding	ENSG00000057294	1.42958	5.22192	6.43935e-91	3.15253e-89
MSH4	protein_coding	ENSG00000057468	-0.757993	-1.17882	0.0166905	0.0260395
GDI2	protein_coding	ENSG00000057608	-0.682079	8.38075	1.81154e-24	1.12171e-23
PRDM1	protein_coding	ENSG00000057657	-3.18322	3.00888	2.69099e-171	6.05775e-169
ATG5	protein_coding	ENSG00000057663	-0.896123	4.83858	4.61161e-34	4.15718e-33
TMCC3	protein_coding	ENSG00000057704	-1.08951	0.184032	2.62829e-08	7.18914e-08
MTA3	protein_coding	ENSG00000057935	0.711833	5.38703	1.67149e-25	1.07823e-24
SEC61A1	protein_coding	ENSG00000058262	-0.648246	8.76824	2.44904e-23	1.4423e-22
CAMK2B	protein_coding	ENSG00000058404	2.72425	0.798727	4.94948e-31	3.94631e-30
CROCC	protein_coding	ENSG00000058453	0.813222	4.80388	4.84123e-23	2.82009e-22
ZC3H11A	protein_coding	ENSG00000058673	-1.94459	-2.26822	7.86064e-06	1.78706e-05
RIOK2	protein_coding	ENSG00000058729	-1.07868	5.36235	9.91499e-49	1.46607e-47
DGKG	protein_coding	ENSG00000058866	0.686807	2.34974	2.31398e-09	6.82131e-09
FLYWCH1	protein_coding	ENSG00000059122	1.21997	5.22279	3.37361e-63	7.717e-62
UNKL	protein_coding	ENSG00000059145	1.24479	5.42866	9.91501e-68	2.56799e-66
TBXAS1	protein_coding	ENSG00000059377	0.672487	0.459778	0.000138392	0.000280145
PARP12	protein_coding	ENSG00000059378	0.674796	4.34019	4.81439e-18	2.28276e-17
ALDH18A1	protein_coding	ENSG00000059573	-0.81224	7.29626	3.26998e-37	3.29419e-36
GATB	protein_coding	ENSG00000059691	-0.86041	3.99713	3.11856e-25	1.98774e-24
CDK17	protein_coding	ENSG00000059758	-0.965313	4.78024	1.70007e-35	1.6192e-34
DNAJC25	protein_coding	ENSG00000059769	-1.48404	3.54095	1.06799e-60	2.26051e-59
SLC2A3	protein_coding	ENSG00000059804	-0.925739	5.67057	6.50063e-44	8.28907e-43
PSD	protein_coding	ENSG00000059915	0.851384	2.15391	1.61164e-11	5.39835e-11
STYK1	protein_coding	ENSG00000060140	1.55272	2.3092	7.27881e-41	8.36473e-40
GNA15	protein_coding	ENSG00000060558	1.2917	-1.17654	0.000848427	0.0015771
CREB3L3	protein_coding	ENSG00000060566	5.5653	-3.61846	0.000878508	0.00162937
PIGV	protein_coding	ENSG00000060642	1.3386	3.49593	1.23287e-49	1.86534e-48
PTPRU	protein_coding	ENSG00000060656	1.15285	5.7191	3.34416e-66	8.30419e-65
RIMBP2	protein_coding	ENSG00000060709	2.09147	1.13007	4.13246e-37	4.14398e-36
COL11A1	protein_coding	ENSG00000060718	1.42341	7.31421	6.05102e-99	3.50363e-97
MPC1	protein_coding	ENSG00000060762	0.81684	4.16778	6.95312e-26	4.55356e-25
LZTS1	protein_coding	ENSG00000061337	2.45105	2.94456	2.36365e-125	2.39216e-123
PRDM6	protein_coding	ENSG00000061455	2.60092	-2.00484	6.75167e-09	1.92254e-08
SPAG4	protein_coding	ENSG00000061656	1.10402	1.64147	4.20785e-16	1.80474e-15
NCKAP1	protein_coding	ENSG00000061676	-0.753675	7.94037	2.07713e-31	1.68174e-30
MRPS35	protein_coding	ENSG00000061794	-0.924625	5.6337	1.98616e-32	1.67861e-31
GUCY1B1	protein_coding	ENSG00000061918	1.28418	1.28558	1.73587e-17	8.00072e-17
SFSWAP	protein_coding	ENSG00000061936	-0.725105	6.20974	1.20955e-27	8.51387e-27
CDH3	protein_coding	ENSG00000062038	0.972968	-1.10112	0.0219054	0.0335518
GPBP1	protein_coding	ENSG00000062194	-1.31646	6.65609	3.70384e-85	1.55697e-83
LTK	protein_coding	ENSG00000062524	0.982003	-0.439701	0.000239714	0.000473938
WAPL	protein_coding	ENSG00000062650	-0.701478	7.35403	9.09666e-25	5.69712e-24
SLC6A16	protein_coding	ENSG00000063127	1.01545	2.57726	4.65057e-07	1.16479e-06
BICRA	protein_coding	ENSG00000063169	-0.711306	4.60055	1.07853e-16	4.77634e-16
U2AF2	protein_coding	ENSG00000063244	-1.05336	8.41383	2.63807e-59	5.31742e-58
AHRR	protein_coding	ENSG00000063438	1.79958	3.12277	1.95496e-58	3.84088e-57
ADCK1	protein_coding	ENSG00000063761	1.12635	2.07144	6.43377e-19	3.16654e-18
HAGH	protein_coding	ENSG00000063854	0.655823	4.26057	3.8775e-17	1.75857e-16
RNF4	protein_coding	ENSG00000063978	-0.633285	6.17092	1.07318e-21	5.9234e-21
INTS13	protein_coding	ENSG00000064102	-0.932117	6.09524	1.29077e-35	1.23622e-34
TM7SF3	protein_coding	ENSG00000064115	0.980562	6.74985	2.2987e-50	3.55384e-49
SPA17	protein_coding	ENSG00000064199	-1.57072	3.71588	2.03899e-73	6.12383e-72
TSPAN32	protein_coding	ENSG00000064201	5.88176	-4.11275	0.000141289	0.000285553
WISP2	protein_coding	ENSG00000064205	2.11367	-2.48372	4.60537e-05	9.7675e-05
ATP2C2	protein_coding	ENSG00000064270	2.22254	-1.61337	0.00157675	0.00283047
NGFR	protein_coding	ENSG00000064300	-0.970423	2.4848	2.06936e-14	8.15256e-14
CDON	protein_coding	ENSG00000064309	1.47253	3.3786	6.30585e-49	9.37587e-48
TNPO3	protein_coding	ENSG00000064419	-0.606253	6.27924	5.59633e-19	2.76114e-18
LPAR2	protein_coding	ENSG00000064547	2.1715	1.77421	2.18906e-42	2.65899e-41
EYA2	protein_coding	ENSG00000064655	2.80092	2.24425	5.04038e-107	3.44908e-105
ABCA7	protein_coding	ENSG00000064687	2.34863	2.60537	4.61606e-71	1.30808e-69
BTBD1	protein_coding	ENSG00000064726	-0.644698	6.56081	1.66998e-22	9.51392e-22
FAR2	protein_coding	ENSG00000064763	0.989633	1.96592	3.85246e-15	1.57545e-14
PMS1	protein_coding	ENSG00000064933	0.814465	4.39927	1.49901e-25	9.68264e-25
CALCRL	protein_coding	ENSG00000064989	1.79937	-1.67416	9.6262e-08	2.53794e-07
ZNF76	protein_coding	ENSG00000065029	1.0049	4.13314	1.90931e-34	1.74998e-33
UHRF1BP1	protein_coding	ENSG00000065060	1.7287	6.3344	1.97149e-133	2.33927e-131
GNAI3	protein_coding	ENSG00000065135	-0.634324	7.56447	3.20032e-22	1.80868e-21
IPO5	protein_coding	ENSG00000065150	-0.642901	7.6355	1.08529e-22	6.23454e-22
WDR3	protein_coding	ENSG00000065183	-1.35148	7.28943	1.77242e-70	4.92981e-69
NTN1	protein_coding	ENSG00000065320	1.29781	5.88424	9.65395e-74	2.93234e-72
GLP2R	protein_coding	ENSG00000065325	1.77864	4.89999	1.38986e-115	1.1544e-113
DGKA	protein_coding	ENSG00000065357	1.92507	4.35617	4.10998e-121	3.79299e-119
ERBB3	protein_coding	ENSG00000065361	1.43992	1.48606	1.67316e-25	1.07902e-24
ANKRD44	protein_coding	ENSG00000065413	2.17412	3.19453	2.1748e-104	1.41198e-102
KARS	protein_coding	ENSG00000065427	-0.9192	7.82523	4.29404e-46	5.95113e-45
ADAT1	protein_coding	ENSG00000065457	0.630439	4.99986	9.9004e-17	4.39497e-16
SPEN	protein_coding	ENSG00000065526	-1.1391	6.97361	1.26589e-56	2.33652e-55
MYLK	protein_coding	ENSG00000065534	1.27876	5.90588	3.59857e-75	1.13158e-73
ZC3H15	protein_coding	ENSG00000065548	-1.24923	7.29482	3.94271e-64	9.22917e-63
SNAP91	protein_coding	ENSG00000065609	2.79996	-0.109633	3.69056e-32	3.08126e-31
SLK	protein_coding	ENSG00000065613	-0.608726	6.83978	5.46633e-16	2.33453e-15
CYB5R4	protein_coding	ENSG00000065615	-1.01988	4.73142	4.40007e-42	5.26762e-41
COL17A1	protein_coding	ENSG00000065618	0.638407	4.55614	1.34431e-16	5.92721e-16
PRKCQ	protein_coding	ENSG00000065675	1.19862	3.39017	1.03182e-40	1.18013e-39
CDK13	protein_coding	ENSG00000065883	-0.897984	6.83513	1.4227e-43	1.79417e-42
MTHFD2	protein_coding	ENSG00000065911	0.711916	8.1338	5.56916e-24	3.37895e-23
YBX1	protein_coding	ENSG00000065978	-0.797296	11.0175	1.3802e-30	1.0836e-29
PPP2R5A	protein_coding	ENSG00000066027	-0.670391	4.939	9.41817e-21	4.99461e-20
CTNNA2	protein_coding	ENSG00000066032	-0.633828	-0.30312	0.00423739	0.00721569
TIE1	protein_coding	ENSG00000066056	0.719257	1.89077	0.000225763	0.000447421
NFYC	protein_coding	ENSG00000066136	-0.587914	6.14203	6.54562e-19	3.22027e-18
NGEF	protein_coding	ENSG00000066248	0.959858	1.66103	1.17529e-11	3.96875e-11
ASPM	protein_coding	ENSG00000066279	1.17372	7.35943	7.16754e-55	1.25926e-53
ZNRD1	protein_coding	ENSG00000066379	-0.709044	3.0329	7.15313e-11	2.31365e-10
MPPED2	protein_coding	ENSG00000066382	2.24808	0.638517	1.44986e-29	1.09786e-28
ZBTB11	protein_coding	ENSG00000066422	-1.18194	6.04091	5.79993e-71	1.63778e-69
ATXN3	protein_coding	ENSG00000066427	-0.636117	4.12405	1.43885e-13	5.40428e-13
THUMPD1	protein_coding	ENSG00000066654	-0.826759	5.85261	2.07492e-33	1.82537e-32
MSANTD3	protein_coding	ENSG00000066697	-0.82187	6.31894	4.28791e-32	3.5701e-31
KIF26A	protein_coding	ENSG00000066735	0.82531	3.85456	3.78171e-19	1.87853e-18
ATG2B	protein_coding	ENSG00000066739	0.644459	3.93624	1.37187e-14	5.46366e-14
ZFAT	protein_coding	ENSG00000066827	-1.42257	3.77558	5.61769e-61	1.20385e-59
STAG3	protein_coding	ENSG00000066923	-1.37339	-1.07612	5.21956e-05	0.000109994
MYO9A	protein_coding	ENSG00000066933	0.982897	5.36158	2.36445e-40	2.67885e-39
IDI1	protein_coding	ENSG00000067064	0.722253	5.52613	1.54109e-23	9.16097e-23
SP100	protein_coding	ENSG00000067066	-0.602247	5.26538	4.16574e-17	1.88538e-16
KLF6	protein_coding	ENSG00000067082	-1.48285	6.50212	4.16267e-66	1.02943e-64
PLPP1	protein_coding	ENSG00000067113	1.15379	3.54644	3.47572e-39	3.761e-38
NEO1	protein_coding	ENSG00000067141	0.604642	6.08501	4.57759e-20	2.35952e-19
PHKA1	protein_coding	ENSG00000067177	1.21494	4.59855	1.49989e-52	2.46271e-51
EVI5	protein_coding	ENSG00000067208	-0.707769	4.43617	4.72478e-20	2.43487e-19
STOML1	protein_coding	ENSG00000067221	0.871315	2.52894	2.09123e-13	7.78781e-13
PKM	protein_coding	ENSG00000067225	-0.94306	11.4311	9.68546e-47	1.36429e-45
DHX29	protein_coding	ENSG00000067248	-0.639261	6.15665	4.03956e-20	2.08576e-19
DNTTIP2	protein_coding	ENSG00000067334	-1.36931	6.93896	2.32575e-85	9.88012e-84
TRO	protein_coding	ENSG00000067445	0.728684	6.1199	2.99589e-28	2.15473e-27
RRP15	protein_coding	ENSG00000067533	-1.76562	5.34519	2.71719e-122	2.56662e-120
RHOA	protein_coding	ENSG00000067560	-0.642723	8.68296	1.43404e-23	8.53094e-23
DHX8	protein_coding	ENSG00000067596	-0.613588	6.12699	1.61199e-18	7.81246e-18
PMS2P4	transcribed_unprocessed_pseudogene	ENSG00000067601	0.62112	1.43774	4.88507e-06	1.13054e-05
SYT1	protein_coding	ENSG00000067715	1.77867	2.27116	6.55349e-41	7.54199e-40
NAV3	protein_coding	ENSG00000067798	-0.849686	5.75667	2.24717e-33	1.97402e-32
ROGDI	protein_coding	ENSG00000067836	0.840782	1.77459	4.19106e-08	1.13059e-07
PDZD4	protein_coding	ENSG00000067840	0.778489	4.5216	7.79195e-25	4.89527e-24
ATP2B3	protein_coding	ENSG00000067842	2.08806	0.207001	4.69469e-21	2.52356e-20
ROCK1	protein_coding	ENSG00000067900	-0.71528	7.03028	1.2047e-25	7.81095e-25
CBFB	protein_coding	ENSG00000067955	-0.749592	6.75596	7.04387e-29	5.20926e-28
HDAC4	protein_coding	ENSG00000068024	0.901256	0.714639	8.80836e-06	1.99311e-05
RASSF1	protein_coding	ENSG00000068028	0.613116	4.36483	1.02518e-14	4.106e-14
FGFR3	protein_coding	ENSG00000068078	0.725249	2.52558	3.84049e-12	1.33121e-11
PLEKHH3	protein_coding	ENSG00000068137	0.676846	3.93321	8.57844e-18	4.01221e-17
PRR11	protein_coding	ENSG00000068489	-0.690774	8.34227	4.17722e-24	2.54984e-23
REEP1	protein_coding	ENSG00000068615	3.17438	2.41964	7.63248e-145	1.121e-142
POLR1A	protein_coding	ENSG00000068654	-0.712589	7.35845	1.20708e-24	7.53239e-24
RASGRP2	protein_coding	ENSG00000068831	1.14804	0.345001	8.65775e-08	2.29038e-07
PSME4	protein_coding	ENSG00000068878	-1.02189	7.59175	9.78003e-56	1.76063e-54
IFT80	protein_coding	ENSG00000068885	0.612861	3.29771	2.8206e-11	9.33112e-11
PPP2R5B	protein_coding	ENSG00000068971	1.22737	3.05868	9.23413e-39	9.87228e-38
PYGM	protein_coding	ENSG00000068976	-0.79134	0.470478	3.71014e-05	7.94648e-05
PITX1	protein_coding	ENSG00000069011	-0.661153	4.39459	7.09131e-19	3.48518e-18
ADGRF5	protein_coding	ENSG00000069122	0.613159	2.35786	3.5642e-06	8.33666e-06
SDK2	protein_coding	ENSG00000069188	1.64845	4.96964	1.11529e-91	5.60835e-90
DNAJA2	protein_coding	ENSG00000069345	-0.802966	6.7913	1.79e-32	1.51709e-31
BCL3	protein_coding	ENSG00000069399	-1.69194	3.74845	3.33245e-76	1.07025e-74
KCNAB2	protein_coding	ENSG00000069424	0.76302	4.75048	4.81654e-24	2.93488e-23
GAL	protein_coding	ENSG00000069482	2.61245	-2.81931	0.00132453	0.00239825
CLEC2D	protein_coding	ENSG00000069493	0.758748	1.92985	6.55478e-08	1.74748e-07
FUNDC1	protein_coding	ENSG00000069509	-0.669935	4.37096	4.09143e-18	1.94686e-17
RAB27A	protein_coding	ENSG00000069974	0.826279	4.27425	3.95992e-25	2.51404e-24
PHRF1	protein_coding	ENSG00000070047	-1.0344	6.25652	1.65575e-56	3.04675e-55
PTPN3	protein_coding	ENSG00000070159	0.858856	4.87913	3.50342e-32	2.92705e-31
SPTB	protein_coding	ENSG00000070182	1.13572	5.78729	3.01356e-61	6.50427e-60
DAPP1	protein_coding	ENSG00000070190	1.96187	-1.09	8.06635e-10	2.44364e-09
CLTCL1	protein_coding	ENSG00000070371	1.61918	5.09175	7.83429e-118	6.7636e-116
FSTL3	protein_coding	ENSG00000070404	0.603846	7.26524	1.83804e-20	9.63084e-20
DGCR2	protein_coding	ENSG00000070413	1.26936	5.7944	9.51106e-65	2.26825e-63
MNT	protein_coding	ENSG00000070444	-1.11553	4.53952	5.34759e-50	8.16788e-49
ZXDC	protein_coding	ENSG00000070476	0.924881	4.82733	2.1361e-37	2.16641e-36
JMJD6	protein_coding	ENSG00000070495	-0.695846	5.74941	1.07371e-25	6.97663e-25
WIPI1	protein_coding	ENSG00000070540	1.20907	4.00913	4.28509e-50	6.57002e-49
FRMPD1	protein_coding	ENSG00000070601	1.877	-1.07561	1.36712e-08	3.81398e-08
ASNS	protein_coding	ENSG00000070669	1.72203	1.79387	8.30854e-44	1.05441e-42
CNGB1	protein_coding	ENSG00000070729	1.1454	-1.59764	0.0213902	0.0328015
CHAT	protein_coding	ENSG00000070748	1.85071	-0.281414	5.75284e-12	1.97476e-11
PABPC1	protein_coding	ENSG00000070756	-0.956091	10.7651	2.20874e-44	2.86185e-43
CFAP20	protein_coding	ENSG00000070761	-0.630439	5.91088	6.48428e-19	3.19074e-18
CSNK2A2	protein_coding	ENSG00000070770	-0.725094	7.05527	1.71446e-28	1.24574e-27
EIF2B3	protein_coding	ENSG00000070785	-0.640408	5.22117	9.61975e-19	4.70097e-18
CAMK2A	protein_coding	ENSG00000070808	1.84376	-0.182049	1.27618e-06	3.09488e-06
TCOF1	protein_coding	ENSG00000070814	-0.630671	8.23385	3.09901e-22	1.75225e-21
CDC42	protein_coding	ENSG00000070831	-1.13389	-0.214006	5.21176e-07	1.29981e-06
OSBPL3	protein_coding	ENSG00000070882	0.85895	6.33352	1.89136e-38	1.99638e-37
ATP2B1	protein_coding	ENSG00000070961	-0.812199	7.05459	2.65525e-35	2.50321e-34
MAP4K4	protein_coding	ENSG00000071054	-0.620315	8.81746	2.14265e-19	1.07678e-18
MGAT4A	protein_coding	ENSG00000071073	2.1454	2.62663	1.8728e-83	7.45622e-82
WDR1	protein_coding	ENSG00000071127	-0.805625	8.2601	1.81187e-31	1.47242e-30
MS4A12	protein_coding	ENSG00000071203	1.77621	-3.82525	0.0229251	0.0350113
RPS6KA2	protein_coding	ENSG00000071242	1.95585	3.1102	3.95045e-84	1.60734e-82
ING3	protein_coding	ENSG00000071243	-0.802192	3.47417	7.21462e-19	3.54433e-18
VASH1	protein_coding	ENSG00000071246	1.137	4.34573	5.10961e-46	7.06922e-45
LMCD1	protein_coding	ENSG00000071282	1.50961	4.96962	2.27163e-84	9.28977e-83
TCF3	protein_coding	ENSG00000071564	-0.788323	7.32967	1.44821e-34	1.33396e-33
TRIB2	protein_coding	ENSG00000071575	-1.94253	6.09436	1.13392e-157	2.11727e-155
DAZAP1	protein_coding	ENSG00000071626	-0.79065	7.62118	7.11261e-34	6.35701e-33
FAM3A	protein_coding	ENSG00000071889	0.86924	4.27503	3.69862e-29	2.75561e-28
MYO3B	protein_coding	ENSG00000071909	1.26233	-2.39124	0.0110204	0.0176671
CYBRD1	protein_coding	ENSG00000071967	0.910712	5.77344	2.51849e-41	2.93767e-40
CDH19	protein_coding	ENSG00000071991	-6.97251	-2.77018	1.8657e-08	5.15061e-08
ACTN1	protein_coding	ENSG00000072110	-0.749362	9.84087	8.83645e-31	6.98994e-30
PTPN18	protein_coding	ENSG00000072135	0.718122	5.81495	5.11704e-27	3.51152e-26
LIMS2	protein_coding	ENSG00000072163	1.64044	3.21231	2.88914e-58	5.64859e-57
SPEG	protein_coding	ENSG00000072195	1.50584	6.62307	6.06387e-98	3.45297e-96
LNX1	protein_coding	ENSG00000072201	1.26095	2.16078	5.34711e-29	3.96783e-28
TFRC	protein_coding	ENSG00000072274	-1.06081	9.56345	3.22171e-54	5.59088e-53
AFF4	protein_coding	ENSG00000072364	-0.93384	8.29025	2.89413e-43	3.61571e-42
UBE2D1	protein_coding	ENSG00000072401	-0.608795	5.35088	2.41943e-18	1.1646e-17
RHOBTB1	protein_coding	ENSG00000072422	1.01079	5.15531	8.67769e-43	1.0708e-41
MARK2	protein_coding	ENSG00000072518	-0.699275	5.51388	2.24102e-23	1.3214e-22
P4HA2	protein_coding	ENSG00000072682	0.878292	6.55192	5.61497e-41	6.48359e-40
TRNT1	protein_coding	ENSG00000072756	-0.743935	5.4049	9.50643e-26	6.19371e-25
STK10	protein_coding	ENSG00000072786	-0.84371	6.33677	2.88534e-37	2.91279e-36
TMEM38A	protein_coding	ENSG00000072954	0.796674	3.17462	1.17932e-18	5.73748e-18
MOV10L1	protein_coding	ENSG00000073146	3.10266	1.55579	4.7304e-84	1.92143e-82
SELENOO	protein_coding	ENSG00000073169	0.591129	4.62914	1.17853e-11	3.97859e-11
TP63	protein_coding	ENSG00000073282	1.50508	-1.43787	0.00523047	0.00878987
ALPK1	protein_coding	ENSG00000073331	1.12542	3.69469	1.85075e-34	1.69825e-33
LLGL2	protein_coding	ENSG00000073350	2.25046	0.171774	2.06343e-27	1.4373e-26
PDE8A	protein_coding	ENSG00000073417	-0.771348	5.73952	1.88345e-28	1.36606e-27
GSDMB	protein_coding	ENSG00000073605	0.899489	4.20068	8.40419e-22	4.6611e-21
KDM5A	protein_coding	ENSG00000073614	-0.699335	6.23366	1.51293e-23	8.99801e-23
PPP2R3A	protein_coding	ENSG00000073711	-0.626758	5.6064	7.31202e-19	3.58925e-18
DHRS9	protein_coding	ENSG00000073737	-1.09457	-2.678	0.0172631	0.0268875
IGF2BP2	protein_coding	ENSG00000073792	-0.791091	7.28296	1.89097e-33	1.66598e-32
ST6GAL1	protein_coding	ENSG00000073849	0.676572	2.6642	2.19167e-10	6.88544e-10
VDAC1P1	processed_pseudogene	ENSG00000073905	-1.09558	-1.37942	0.00139759	0.00252294
FRY	protein_coding	ENSG00000073910	2.16085	1.56187	3.73432e-39	4.03901e-38
GLI2	protein_coding	ENSG00000074047	0.914614	6.16701	2.39052e-34	2.18107e-33
MRPS34	protein_coding	ENSG00000074071	-0.671797	7.07526	6.2094e-20	3.18632e-19
NOTCH3	protein_coding	ENSG00000074181	1.58707	6.00051	6.5388e-94	3.48451e-92
CLNS1A	protein_coding	ENSG00000074201	-0.642322	7.08977	2.69142e-21	1.45976e-20
CDHR2	protein_coding	ENSG00000074276	2.22536	-3.80686	0.0303377	0.0453484
ATP2A3	protein_coding	ENSG00000074370	2.5127	1.64549	2.51203e-59	5.07185e-58
NTN4	protein_coding	ENSG00000074527	1.20507	4.41292	1.05925e-55	1.90404e-54
ZNF532	protein_coding	ENSG00000074657	-0.834885	6.98409	8.17077e-36	7.87868e-35
SCARF1	protein_coding	ENSG00000074660	-0.816002	0.49931	0.000246039	0.000486045
LMAN1	protein_coding	ENSG00000074695	-0.595152	8.15516	2.0758e-20	1.08483e-19
IPCEF1	protein_coding	ENSG00000074706	2.27619	-3.05016	0.000695995	0.00130778
ENO1	protein_coding	ENSG00000074800	-0.860599	11.3344	1.77092e-38	1.87335e-37
ANO8	protein_coding	ENSG00000074855	1.93993	3.12921	1.36356e-76	4.40859e-75
ARHGEF10L	protein_coding	ENSG00000074964	1.4608	3.60685	2.85075e-59	5.7413e-58
TXK	protein_coding	ENSG00000074966	2.1237	-1.98564	3.57835e-07	9.04331e-07
TIPIN	protein_coding	ENSG00000075131	-1.24823	4.74749	2.93879e-59	5.91368e-58
NUP37	protein_coding	ENSG00000075188	-0.725191	4.68059	3.53923e-22	1.99367e-21
SEMA3A	protein_coding	ENSG00000075213	0.664877	3.53158	1.54543e-10	4.89477e-10
CELSR1	protein_coding	ENSG00000075275	2.27999	-0.741246	4.43161e-15	1.80647e-14
SLC25A40	protein_coding	ENSG00000075303	1.00585	4.20759	7.15926e-33	6.16757e-32
TIMM21	protein_coding	ENSG00000075336	-0.752731	5.817	4.35124e-28	3.11096e-27
RASAL2	protein_coding	ENSG00000075391	0.740018	6.19099	8.51082e-27	5.7828e-26
VPS9D1	protein_coding	ENSG00000075399	1.81279	4.25575	8.34733e-49	1.23654e-47
MARK3	protein_coding	ENSG00000075413	-0.769367	5.91745	1.35072e-31	1.10287e-30
FOSL2	protein_coding	ENSG00000075426	-1.27573	8.21848	1.69194e-81	6.31842e-80
CACNG5	protein_coding	ENSG00000075429	-1.87366	-2.96591	0.00151341	0.00272223
FSCN1	protein_coding	ENSG00000075618	-0.717636	9.30435	3.19398e-27	2.21073e-26
ACTB	protein_coding	ENSG00000075624	-0.63911	12.122	4.08312e-22	2.29361e-21
MOCOS	protein_coding	ENSG00000075643	1.53602	4.26916	1.04819e-78	3.58634e-77
PLD1	protein_coding	ENSG00000075651	1.63605	4.10924	5.68646e-90	2.71766e-88
WDR62	protein_coding	ENSG00000075702	0.847373	6.1442	7.03227e-35	6.54254e-34
RAB7A	protein_coding	ENSG00000075785	-0.880879	7.45247	1.35077e-40	1.53908e-39
SEC31B	protein_coding	ENSG00000075826	1.5647	2.61716	4.28946e-16	1.83876e-15
ARHGAP15	protein_coding	ENSG00000075884	-1.66696	-2.64073	0.00157885	0.00283382
TUBA3D	protein_coding	ENSG00000075886	-0.979684	-0.61937	0.0115188	0.0184125
PAX2	protein_coding	ENSG00000075891	2.20082	0.666967	5.06496e-31	4.03572e-30
EXOSC7	protein_coding	ENSG00000075914	-1.03223	4.28886	9.40413e-40	1.03717e-38
KIFAP3	protein_coding	ENSG00000075945	1.00972	3.69339	7.87688e-32	6.49984e-31
RBMS2	protein_coding	ENSG00000076067	0.600243	6.50493	2.26124e-20	1.17918e-19
BAZ2A	protein_coding	ENSG00000076108	-0.672741	7.57685	4.69031e-25	2.96991e-24
UNG	protein_coding	ENSG00000076248	-0.902785	5.71031	2.42319e-43	3.03365e-42
FMO4	protein_coding	ENSG00000076258	0.981337	0.208211	1.477e-06	3.56335e-06
SLC46A1	protein_coding	ENSG00000076351	1.56061	4.97653	1.71667e-94	9.18874e-93
ANKRD13A	protein_coding	ENSG00000076513	-0.737472	5.71406	2.77232e-24	1.7048e-23
ACACB	protein_coding	ENSG00000076555	1.12969	2.11532	2.49449e-22	1.41442e-21
MCAM	protein_coding	ENSG00000076706	1.54317	8.34008	2.65354e-124	2.63028e-122
GPC4	protein_coding	ENSG00000076716	1.63422	5.04548	8.49028e-103	5.24372e-101
CAMSAP3	protein_coding	ENSG00000076826	0.784818	1.72512	1.24622e-08	3.48598e-08
DGKD	protein_coding	ENSG00000077044	-1.02765	7.3815	6.55634e-50	9.98247e-49
RARB	protein_coding	ENSG00000077092	2.27546	-0.185239	3.72858e-22	2.09837e-21
TM9SF3	protein_coding	ENSG00000077147	-0.787939	8.37132	3.60067e-34	3.25682e-33
UBE2T	protein_coding	ENSG00000077152	1.01542	5.22358	4.32474e-45	5.74573e-44
PAK3	protein_coding	ENSG00000077264	0.953994	3.38467	1.41866e-25	9.17597e-25
CAPN6	protein_coding	ENSG00000077274	1.71943	0.803503	1.62545e-23	9.64579e-23
DCX	protein_coding	ENSG00000077279	2.07966	-3.4228	0.00829723	0.0135367
EXOSC5	protein_coding	ENSG00000077348	-0.725651	3.97757	4.52826e-19	2.2429e-18
DYNC1I2	protein_coding	ENSG00000077380	-0.722707	7.20242	1.23856e-26	8.35663e-26
LRCH4	protein_coding	ENSG00000077454	0.632214	3.64413	8.95538e-12	3.04157e-11
POLD3	protein_coding	ENSG00000077514	0.814467	5.0603	1.00096e-31	8.20914e-31
CAPZB	protein_coding	ENSG00000077549	-0.602258	6.82058	4.00358e-21	2.15688e-20
GPR137B	protein_coding	ENSG00000077585	-0.682951	4.44569	2.87382e-18	1.37919e-17
NAALAD2	protein_coding	ENSG00000077616	1.57363	2.45854	3.75448e-41	4.35828e-40
FBLN1	protein_coding	ENSG00000077942	0.702073	6.98954	5.38469e-26	3.54181e-25
CST7	protein_coding	ENSG00000077984	1.19225	1.04711	5.97036e-13	2.16546e-12
MAP2	protein_coding	ENSG00000078018	2.40022	3.82396	1.66861e-126	1.72497e-124
AMPH	protein_coding	ENSG00000078053	1.34198	4.8006	1.43436e-76	4.63129e-75
LAMP3	protein_coding	ENSG00000078081	1.88106	2.15656	2.98525e-52	4.86837e-51
FAP	protein_coding	ENSG00000078098	1.90424	3.36687	1.33945e-68	3.58481e-67
NEBL	protein_coding	ENSG00000078114	0.597095	2.0474	1.68406e-06	4.04629e-06
UBE2K	protein_coding	ENSG00000078140	-0.866698	6.86662	5.32576e-38	5.52938e-37
PIK3C3	protein_coding	ENSG00000078142	-0.831111	4.67383	1.98101e-29	1.49207e-28
TIGAR	protein_coding	ENSG00000078237	-0.643551	2.10401	1.1153e-08	3.12847e-08
TULP3	protein_coding	ENSG00000078246	1.0874	5.75594	9.80864e-57	1.823e-55
ADCY2	protein_coding	ENSG00000078295	1.00888	1.77504	2.36511e-12	8.28992e-12
RBFOX1	protein_coding	ENSG00000078328	1.64905	1.03874	1.85709e-22	1.05724e-21
GNB1	protein_coding	ENSG00000078369	-1.09826	8.24884	3.71833e-63	8.48943e-62
HOXA9	protein_coding	ENSG00000078399	-0.650549	3.22087	7.33853e-13	2.64734e-12
NRDC	protein_coding	ENSG00000078618	-0.840019	7.71111	5.73209e-38	5.941e-37
TP53INP2	protein_coding	ENSG00000078804	1.21038	4.93449	4.62109e-53	7.66585e-52
TP73	protein_coding	ENSG00000078900	2.5418	3.27821	2.6891e-149	4.28957e-147
RUNX1T1	protein_coding	ENSG00000079102	1.58822	-1.9548	1.453e-05	3.22714e-05
XRCC5	protein_coding	ENSG00000079246	-0.707853	8.98861	1.06614e-25	6.93124e-25
MKNK1	protein_coding	ENSG00000079277	-1.18861	1.06946	1.30973e-12	4.65781e-12
SAR1A	protein_coding	ENSG00000079332	-0.838735	7.44538	2.57016e-33	2.252e-32
RAPGEF3	protein_coding	ENSG00000079337	0.931517	2.09905	1.07964e-13	4.0799e-13
CEACAM1	protein_coding	ENSG00000079385	3.33822	0.167095	9.39203e-40	1.03631e-38
LIPE	protein_coding	ENSG00000079435	-0.737721	3.15368	6.98342e-13	2.52037e-12
OPHN1	protein_coding	ENSG00000079482	1.1219	3.86804	1.58936e-38	1.68647e-37
CARMIL1	protein_coding	ENSG00000079691	0.603042	4.12463	1.46747e-13	5.50833e-13
PGM1	protein_coding	ENSG00000079739	0.934039	5.59375	4.99355e-45	6.62333e-44
DDX1	protein_coding	ENSG00000079785	-0.966627	7.73228	2.98644e-48	4.35966e-47
DNM2	protein_coding	ENSG00000079805	-0.783999	6.63561	4.72844e-34	4.2609e-33
EPB41L2	protein_coding	ENSG00000079819	-0.775539	8.66551	2.81244e-29	2.10776e-28
MOXD1	protein_coding	ENSG00000079931	0.96548	5.16931	1.94218e-43	2.44034e-42
DDX43	protein_coding	ENSG00000080007	-1.01033	4.29237	6.92846e-38	7.16248e-37
PTPRH	protein_coding	ENSG00000080031	1.31186	2.31539	3.75548e-26	2.48512e-25
EPHA6	protein_coding	ENSG00000080224	1.26659	1.81088	2.39673e-21	1.30257e-20
RFX3	protein_coding	ENSG00000080298	0.62008	3.51003	7.25302e-11	2.3447e-10
RIF1	protein_coding	ENSG00000080345	-0.862743	7.18106	5.38052e-34	4.84127e-33
RAB21	protein_coding	ENSG00000080371	-0.723434	5.48661	4.02219e-26	2.65796e-25
SLC4A4	protein_coding	ENSG00000080493	2.40712	2.36163	5.78999e-85	2.41705e-83
SMARCA2	protein_coding	ENSG00000080503	0.828918	5.72534	1.97806e-33	1.74079e-32
RDH8	protein_coding	ENSG00000080511	-3.34572	-1.75879	1.41734e-07	3.68398e-07
SRCAP	protein_coding	ENSG00000080603	-1.24953	3.09929	1.189e-25	7.71537e-25
PUM3	protein_coding	ENSG00000080608	-0.97001	6.11121	6.93681e-40	7.69631e-39
CHRNA3	protein_coding	ENSG00000080644	1.2584	1.83952	1.86786e-22	1.06312e-21
CNOT4	protein_coding	ENSG00000080802	-0.671596	4.714	9.463e-17	4.20623e-16
HSP90AA1	protein_coding	ENSG00000080824	-1.42912	11.1396	3.06315e-87	1.36634e-85
DLGAP4	protein_coding	ENSG00000080845	0.781413	6.99157	1.23374e-31	1.00907e-30
CROCCP3	transcribed_unprocessed_pseudogene	ENSG00000080947	1.01107	2.00958	1.67583e-12	5.91873e-12
NDC80	protein_coding	ENSG00000080986	0.79263	7.31605	4.28712e-27	2.94787e-26
COL4A4	protein_coding	ENSG00000081052	2.30188	4.20976	3.22695e-170	6.93996e-168
CDH7	protein_coding	ENSG00000081138	1.07174	-1.73082	0.00673623	0.0111332
IMPG2	protein_coding	ENSG00000081148	1.31046	-1.02942	1.21934e-05	2.72577e-05
PCNP	protein_coding	ENSG00000081154	-0.797468	7.39003	1.68756e-34	1.55028e-33
MEF2C	protein_coding	ENSG00000081189	-0.924187	0.931514	3.3059e-08	8.98749e-08
UBA5	protein_coding	ENSG00000081307	-0.700651	5.71003	1.83986e-26	1.23239e-25
DUSP12	protein_coding	ENSG00000081721	-0.751831	4.90089	8.07374e-25	5.06834e-24
CADPS2	protein_coding	ENSG00000081803	1.67458	2.37036	1.41083e-47	2.02881e-46
PCDHB4	protein_coding	ENSG00000081818	0.767787	-0.72239	0.00158185	0.00283877
BZW1	protein_coding	ENSG00000082153	-1.11344	8.43655	2.56901e-59	5.18256e-58
C1QTNF3	protein_coding	ENSG00000082196	1.29342	-0.754618	4.78301e-06	1.10767e-05
CCNT2	protein_coding	ENSG00000082258	-0.828831	6.12116	4.40823e-37	4.41869e-36
COL19A1	protein_coding	ENSG00000082293	-0.724538	0.356173	0.00142583	0.00257104
EPB41L3	protein_coding	ENSG00000082397	-0.585821	7.69897	2.3604e-17	1.08069e-16
COBLL1	protein_coding	ENSG00000082438	0.871295	4.62846	1.9989e-30	1.5607e-29
SERTAD4	protein_coding	ENSG00000082497	0.943751	5.93593	1.40304e-43	1.7703e-42
TRAF5	protein_coding	ENSG00000082512	0.719185	4.6501	2.98578e-23	1.7524e-22
MRPL22	protein_coding	ENSG00000082515	-0.782786	5.10357	9.47071e-28	6.69369e-27
GEMIN5	protein_coding	ENSG00000082516	-1.16825	6.68676	4.85154e-63	1.10348e-61
OPRK1	protein_coding	ENSG00000082556	1.8689	-1.27479	3.90386e-09	1.13265e-08
SEMA5B	protein_coding	ENSG00000082684	2.99815	-2.87697	0.00173657	0.00310486
GSK3B	protein_coding	ENSG00000082701	-0.768509	6.88114	3.137e-31	2.51534e-30
XPO1	protein_coding	ENSG00000082898	-1.15065	8.88778	4.69063e-65	1.13096e-63
TRPM3	protein_coding	ENSG00000083067	2.00238	-1.75439	0.000107293	0.000219535
PALB2	protein_coding	ENSG00000083093	-1.08229	4.86215	8.71363e-51	1.36644e-49
DOP1A	protein_coding	ENSG00000083097	1.09806	2.86957	1.69786e-26	1.13917e-25
BCKDHB	protein_coding	ENSG00000083123	0.606973	2.86908	4.37221e-10	1.34551e-09
KAT6A	protein_coding	ENSG00000083168	-0.784935	6.44516	1.0219e-26	6.92389e-26
TUT7	protein_coding	ENSG00000083223	-1.00651	5.62425	3.84705e-43	4.79131e-42
ULK2	protein_coding	ENSG00000083290	1.79802	2.05307	1.17954e-48	1.73877e-47
P2RX5	protein_coding	ENSG00000083454	-0.612025	0.865172	0.000300107	0.000587601
DIS3	protein_coding	ENSG00000083520	-1.31538	6.0601	9.10078e-79	3.13158e-77
PIBF1	protein_coding	ENSG00000083535	-0.961456	3.84804	3.53068e-29	2.63374e-28
NUFIP1	protein_coding	ENSG00000083635	-1.10073	3.8973	1.9799e-37	2.01053e-36
PDS5B	protein_coding	ENSG00000083642	-0.784813	6.13764	2.73079e-28	1.96641e-27
RRAGB	protein_coding	ENSG00000083750	-0.64129	3.17244	1.51739e-11	5.09471e-11
ZNF324	protein_coding	ENSG00000083812	-0.948937	2.73767	5.70553e-22	3.18418e-21
ZNF416	protein_coding	ENSG00000083817	-1.41151	1.94346	3.28328e-34	2.9787e-33
ZNF446	protein_coding	ENSG00000083838	0.764321	2.03812	2.35046e-10	7.36703e-10
YTHDC1	protein_coding	ENSG00000083896	-0.901391	7.07758	1.27501e-43	1.61129e-42
ZMPSTE24	protein_coding	ENSG00000084073	-0.82917	7.08521	6.27606e-36	6.08091e-35
REST	protein_coding	ENSG00000084093	-0.91034	6.86264	8.92696e-40	9.87253e-39
HAL	protein_coding	ENSG00000084110	2.47854	-2.0471	1.59569e-07	4.13238e-07
SSH1	protein_coding	ENSG00000084112	0.984309	6.25475	1.00231e-45	1.3694e-44
SLCO1A2	protein_coding	ENSG00000084453	1.77784	0.0931862	7.72225e-18	3.62161e-17
WBP11	protein_coding	ENSG00000084463	-0.794432	7.80994	1.41642e-33	1.25339e-32
EIF3I	protein_coding	ENSG00000084623	-0.644794	7.82808	3.30925e-23	1.93705e-22
COL16A1	protein_coding	ENSG00000084636	0.946498	7.07988	5.86774e-45	7.76573e-44
EFR3B	protein_coding	ENSG00000084710	1.47696	5.22858	1.40159e-87	6.36983e-86
KIF3C	protein_coding	ENSG00000084731	0.687705	6.04354	1.88588e-23	1.11555e-22
MAPRE3	protein_coding	ENSG00000084764	1.4372	4.19145	2.72086e-71	7.7651e-70
AK6	protein_coding	ENSG00000085231	-0.712253	3.50984	4.32923e-12	1.4961e-11
MYNN	protein_coding	ENSG00000085274	-0.770008	4.59692	5.23339e-24	3.18014e-23
PREP	protein_coding	ENSG00000085377	-0.853317	5.60822	1.79511e-36	1.76918e-35
SEH1L	protein_coding	ENSG00000085415	-1.05624	7.3531	1.37061e-57	2.62641e-56
OVGP1	protein_coding	ENSG00000085465	-2.08986	0.0817644	9.47514e-22	5.243e-21
MAP3K4	protein_coding	ENSG00000085511	-0.902646	6.22198	1.28529e-39	1.4117e-38
IGSF9	protein_coding	ENSG00000085552	1.0294	3.58117	1.18871e-27	8.36962e-27
ZNF213	protein_coding	ENSG00000085644	-0.627368	4.02276	7.48289e-14	2.85055e-13
RRN3	protein_coding	ENSG00000085721	-0.758895	5.84901	1.6652e-28	1.21104e-27
WNT11	protein_coding	ENSG00000085741	3.29043	0.36228	1.48599e-41	1.75284e-40
MTIF2	protein_coding	ENSG00000085760	-0.765032	6.33702	1.21911e-27	8.57614e-27
TTC39A	protein_coding	ENSG00000085831	1.30047	1.70729	4.47997e-24	2.73118e-23
MGST2	protein_coding	ENSG00000085871	0.731615	3.69621	8.82803e-18	4.12574e-17
CHERP	protein_coding	ENSG00000085872	-0.886533	6.05435	4.14841e-40	4.66275e-39
ATG16L1	protein_coding	ENSG00000085978	-0.62715	5.11089	2.05472e-19	1.03389e-18
RAD54L	protein_coding	ENSG00000085999	1.05306	5.13648	1.38008e-50	2.15159e-49
MAST2	protein_coding	ENSG00000086015	0.631792	7.09935	1.2408e-22	7.11431e-22
DNAJA1	protein_coding	ENSG00000086061	-0.906117	9.42848	6.68255e-40	7.42105e-39
CHMP5	protein_coding	ENSG00000086065	-0.59055	6.50949	2.78204e-17	1.26843e-16
DIMT1	protein_coding	ENSG00000086189	-0.886195	5.6493	4.48845e-32	3.73449e-31
IPO11	protein_coding	ENSG00000086200	-0.88686	5.44654	8.57003e-39	9.16636e-38
FOLH1	protein_coding	ENSG00000086205	1.18187	0.772133	3.81623e-12	1.32318e-11
EPDR1	protein_coding	ENSG00000086289	1.07862	5.6632	8.3607e-59	1.66571e-57
SNX10	protein_coding	ENSG00000086300	1.51554	4.04762	3.74943e-76	1.19937e-74
SEPHS1	protein_coding	ENSG00000086475	-0.735203	6.78168	8.36055e-29	6.15843e-28
ITPKC	protein_coding	ENSG00000086544	-0.683596	4.6424	1.1277e-20	5.962e-20
FAT2	protein_coding	ENSG00000086570	2.36364	-1.07042	1.4643e-09	4.36355e-09
TMED2	protein_coding	ENSG00000086598	-0.706415	8.09156	2.18514e-27	1.52032e-26
ERO1B	protein_coding	ENSG00000086619	-0.909572	3.24418	5.85122e-24	3.5474e-23
HSD17B2	protein_coding	ENSG00000086696	-2.8048	-1.60551	2.22439e-11	7.40142e-11
TXLNG	protein_coding	ENSG00000086712	-0.92953	5.37782	9.02617e-36	8.69305e-35
LAT2	protein_coding	ENSG00000086730	1.0827	5.24748	1.28751e-51	2.05789e-50
MYBPC2	protein_coding	ENSG00000086967	2.02448	-2.00944	0.00141145	0.00254701
NOX4	protein_coding	ENSG00000086991	2.49706	2.36867	4.73602e-83	1.83995e-81
MTMR2	protein_coding	ENSG00000087053	-1.1076	6.61547	9.98149e-62	2.16989e-60
PPP1R15A	protein_coding	ENSG00000087074	-1.36684	5.96696	3.10892e-40	3.50419e-39
HSD17B14	protein_coding	ENSG00000087076	0.845632	2.5768	2.43023e-15	1.00614e-14
SRRT	protein_coding	ENSG00000087087	-1.07218	8.03469	1.5932e-62	3.5698e-61
ADAMTS2	protein_coding	ENSG00000087116	2.16817	3.41556	9.4467e-103	5.8195e-101
ATXN7L3	protein_coding	ENSG00000087152	-0.614863	6.794	1.20713e-20	6.36797e-20
PSMC5	protein_coding	ENSG00000087191	-0.846889	8.15202	1.79866e-37	1.8288e-36
GNAO1	protein_coding	ENSG00000087258	0.958367	3.83507	1.32947e-29	1.00828e-28
NOP14	protein_coding	ENSG00000087269	-1.49032	6.14085	7.07191e-108	4.92316e-106
L2HGDH	protein_coding	ENSG00000087299	0.69248	5.39483	1.92893e-23	1.14046e-22
TXNDC16	protein_coding	ENSG00000087301	0.63416	3.37995	2.9397e-12	1.02517e-11
RTRAF	protein_coding	ENSG00000087302	-0.672385	7.39267	2.1019e-20	1.09799e-19
SF3B2	protein_coding	ENSG00000087365	-0.753782	8.33695	4.77793e-31	3.8108e-30
PTHLH	protein_coding	ENSG00000087494	-1.28788	4.02406	2.97097e-37	2.99672e-36
PHACTR3	protein_coding	ENSG00000087495	1.53497	0.907626	2.54171e-20	1.32343e-19
ERGIC2	protein_coding	ENSG00000087502	-0.602251	6.73018	3.70309e-19	1.84062e-18
TFAP2C	protein_coding	ENSG00000087510	-4.36395	-3.41873	7.42667e-09	2.10951e-08
CASS4	protein_coding	ENSG00000087589	-1.87213	1.39486	1.47758e-28	1.07752e-27
METTL2A	protein_coding	ENSG00000087995	-0.72613	5.5226	1.70483e-27	1.19373e-26
GP6	protein_coding	ENSG00000088053	2.98945	2.36026	2.34856e-120	2.12668e-118
DDX18	protein_coding	ENSG00000088205	-1.33447	7.79828	1.09502e-75	3.47965e-74
KHSRP	protein_coding	ENSG00000088247	-0.840385	8.0613	4.39031e-40	4.93234e-39
GNA11	protein_coding	ENSG00000088256	-0.669376	6.51413	3.09633e-25	1.97462e-24
ASAP3	protein_coding	ENSG00000088280	1.47097	4.21089	5.43766e-73	1.62301e-71
DNMT3B	protein_coding	ENSG00000088305	2.26734	4.99977	9.32574e-198	3.07711e-195
FER1L4	transcribed_unitary_pseudogene	ENSG00000088340	1.95347	1.98739	6.8503e-29	5.07078e-28
TGDS	protein_coding	ENSG00000088451	-0.997736	4.41677	3.04384e-35	2.86731e-34
DOCK3	protein_coding	ENSG00000088538	1.92376	2.90467	1.31674e-72	3.90114e-71
TMEM40	protein_coding	ENSG00000088726	3.27243	1.29919	1.42279e-77	4.75981e-76
KIF9	protein_coding	ENSG00000088727	-0.850199	2.72629	4.83009e-16	2.06757e-15
ARHGAP28	protein_coding	ENSG00000088756	2.01682	3.41617	2.97534e-103	1.85666e-101
CRLS1	protein_coding	ENSG00000088766	-0.750793	4.67485	2.1045e-25	1.35068e-24
SMOX	protein_coding	ENSG00000088826	-1.36886	4.68078	1.65922e-69	4.51589e-68
NSFL1C	protein_coding	ENSG00000088833	-0.816063	6.9938	7.7177e-36	7.45075e-35
SLC4A11	protein_coding	ENSG00000088836	1.15985	4.33895	2.78978e-48	4.07752e-47
ZNF343	protein_coding	ENSG00000088876	-0.64534	3.94359	9.94113e-15	3.98224e-14
EBF4	protein_coding	ENSG00000088881	1.96507	1.16481	2.27654e-31	1.84011e-30
MAVS	protein_coding	ENSG00000088888	1.41861	6.44455	1.13667e-100	6.727e-99
LZTS3	protein_coding	ENSG00000088899	1.46631	5.35811	7.77829e-102	4.70743e-100
XRN2	protein_coding	ENSG00000088930	-1.04008	7.60399	7.81185e-57	1.45638e-55
TESC	protein_coding	ENSG00000088992	-1.32215	-0.546689	2.2126e-08	6.07835e-08
RPL6	protein_coding	ENSG00000089009	-0.706543	9.48705	1.99006e-25	1.27928e-24
P2RX7	protein_coding	ENSG00000089041	2.22319	0.274393	1.63021e-23	9.67163e-23
ESF1	protein_coding	ENSG00000089048	-1.5993	5.95176	6.34198e-88	2.90417e-86
LHX5	protein_coding	ENSG00000089116	-1.14323	1.23092	8.43913e-16	3.57184e-15
OAS1	protein_coding	ENSG00000089127	1.72627	0.291937	1.56833e-16	6.88221e-16
TRMT6	protein_coding	ENSG00000089195	-0.727777	5.97157	1.62412e-16	7.12183e-16
TBX5	protein_coding	ENSG00000089225	1.14825	-1.81445	0.000345768	0.00067236
FUS	protein_coding	ENSG00000089280	-0.929136	9.24205	3.82182e-43	4.76235e-42
IGBP1	protein_coding	ENSG00000089289	-0.661319	5.34801	2.53391e-22	1.43644e-21
GRAMD1A	protein_coding	ENSG00000089351	0.592315	5.63945	2.75247e-16	1.1935e-15
GMIP	protein_coding	ENSG00000089639	1.96722	2.55924	6.71477e-59	1.34112e-57
BIRC5	protein_coding	ENSG00000089685	-0.653244	8.03712	1.50674e-24	9.3659e-24
OTUB2	protein_coding	ENSG00000089723	-1.25617	3.34684	5.34216e-39	5.7522e-38
DDX24	protein_coding	ENSG00000089737	-0.987821	7.28218	2.46389e-44	3.19074e-43
ZBTB25	protein_coding	ENSG00000089775	0.879933	4.33622	1.77476e-30	1.38884e-29
ARHGAP4	protein_coding	ENSG00000089820	1.2372	-0.612693	2.7712e-05	6.00108e-05
ANKRD24	protein_coding	ENSG00000089847	1.28338	1.14942	6.84262e-15	2.76494e-14
DHX32	protein_coding	ENSG00000089876	1.96783	4.1026	3.76698e-116	3.17256e-114
RCOR1	protein_coding	ENSG00000089902	-0.954237	5.98186	3.36234e-45	4.48939e-44
LTBP4	protein_coding	ENSG00000090006	1.09474	7.51435	1.92082e-55	3.42971e-54
SPTLC1	protein_coding	ENSG00000090054	-0.88556	6.78155	5.99507e-40	6.67606e-39
PAPOLA	protein_coding	ENSG00000090060	-1.20306	7.53182	1.42657e-73	4.306e-72
CCNK	protein_coding	ENSG00000090061	-0.77992	5.75894	9.23905e-29	6.791e-28
PCBP4	protein_coding	ENSG00000090097	0.608414	6.41809	6.8095e-21	3.62717e-20
YPEL3	protein_coding	ENSG00000090238	1.31476	2.79192	5.47336e-35	5.1159e-34
NUDC	protein_coding	ENSG00000090273	-0.999734	8.28368	4.90528e-52	7.92976e-51
ICAM1	protein_coding	ENSG00000090339	-0.831961	-0.845322	0.00378431	0.00648451
TFAP4	protein_coding	ENSG00000090447	-1.55865	4.10265	1.52274e-90	7.42475e-89
FETUB	protein_coding	ENSG00000090512	1.22509	-3.0943	0.00817418	0.0133495
P3H2	protein_coding	ENSG00000090530	1.52508	5.09225	1.23745e-94	6.65322e-93
THPO	protein_coding	ENSG00000090534	1.62043	-0.255658	1.33794e-11	4.50476e-11
CHRD	protein_coding	ENSG00000090539	1.97213	2.98638	1.76927e-77	5.89438e-76
ZNF268	protein_coding	ENSG00000090612	-0.87783	4.25946	4.89457e-25	3.09518e-24
PABPC4	protein_coding	ENSG00000090621	-1.03749	8.20001	1.48581e-59	3.0176e-58
EFNB1	protein_coding	ENSG00000090776	-0.920226	5.54623	4.08785e-45	5.434e-44
NAT14	protein_coding	ENSG00000090971	0.787995	4.03782	4.56914e-21	2.45773e-20
PITPNM2	protein_coding	ENSG00000090975	1.30303	3.95361	7.00765e-46	9.63983e-45
RBM27	protein_coding	ENSG00000091009	-1.059	4.69726	1.4876e-45	2.0187e-44
POU4F3	protein_coding	ENSG00000091010	-0.959661	-1.54754	0.00519258	0.00872994
OSBPL8	protein_coding	ENSG00000091039	-0.695702	6.62858	1.24728e-24	7.77518e-24
DTX2	protein_coding	ENSG00000091073	1.15612	4.61808	1.56172e-50	2.43005e-49
PUS7	protein_coding	ENSG00000091127	-0.744934	5.64262	1.24234e-27	8.73704e-27
NRCAM	protein_coding	ENSG00000091129	1.88175	1.47756	2.09214e-35	1.98399e-34
SLC26A4	protein_coding	ENSG00000091137	-3.26951	-1.54402	1.69821e-11	5.68201e-11
DLD	protein_coding	ENSG00000091140	-0.648825	6.41371	4.68596e-22	2.62551e-21
TXNL1	protein_coding	ENSG00000091164	-1.26673	6.35585	3.1446e-84	1.28163e-82
ABCC6	protein_coding	ENSG00000091262	3.21916	0.170181	3.63346e-45	4.84066e-44
ITGA6	protein_coding	ENSG00000091409	-1.02678	8.24841	3.70432e-55	6.54149e-54
RAPGEF4	protein_coding	ENSG00000091428	2.22114	-0.203742	7.83562e-18	3.67263e-17
SEL1L3	protein_coding	ENSG00000091490	1.48908	6.387	1.95139e-109	1.40728e-107
CDV3	protein_coding	ENSG00000091527	-0.910306	9.10599	3.83813e-39	4.14942e-38
ALKBH5	protein_coding	ENSG00000091542	-0.638749	6.48457	3.33961e-23	1.95388e-22
NLRP1	protein_coding	ENSG00000091592	1.35131	4.12315	4.35053e-63	9.91402e-62
CPA1	protein_coding	ENSG00000091704	2.2268	-4.08803	0.0324578	0.0482838
ESR1	protein_coding	ENSG00000091831	-0.983454	-0.557623	0.00692819	0.0114301
ANGPT2	protein_coding	ENSG00000091879	-2.94618	-3.14575	0.0025997	0.00454981
CD200	protein_coding	ENSG00000091972	1.16032	1.87192	2.29784e-21	1.24939e-20
CCDC80	protein_coding	ENSG00000091986	-0.733804	7.7721	3.0308e-28	2.17854e-27
PPP2R3C	protein_coding	ENSG00000092020	-0.999005	3.9204	9.05381e-30	6.89687e-29
HAUS4	protein_coding	ENSG00000092036	0.792615	2.7271	2.62318e-15	1.0836e-14
SLC22A17	protein_coding	ENSG00000092096	1.35392	3.98089	6.84585e-54	1.16947e-52
SCFD1	protein_coding	ENSG00000092108	-0.587699	5.60858	2.08109e-17	9.55896e-17
HNRNPC	protein_coding	ENSG00000092199	-1.42792	9.65087	8.4442e-84	3.38993e-82
RPGRIP1	protein_coding	ENSG00000092200	1.66605	-1.80859	1.14713e-05	2.57246e-05
TOX4	protein_coding	ENSG00000092203	-0.730304	6.23295	2.87973e-29	2.15751e-28
TGM1	protein_coding	ENSG00000092295	1.02036	3.49169	7.31531e-28	5.18705e-27
SEMA6A	protein_coding	ENSG00000092421	2.70359	3.10044	1.63976e-148	2.56473e-146
COL9A3	protein_coding	ENSG00000092758	1.64984	-0.966113	1.92991e-05	4.24217e-05
EZR	protein_coding	ENSG00000092820	-1.00058	9.22908	7.25919e-48	1.05206e-46
AGO1	protein_coding	ENSG00000092847	-0.589941	6.98618	3.89703e-19	1.93342e-18
UNC13D	protein_coding	ENSG00000092929	0.654686	6.12366	6.06327e-21	3.23755e-20
DPYSL2	protein_coding	ENSG00000092964	1.15683	6.20779	8.2038e-61	1.74563e-59
TGFB2	protein_coding	ENSG00000092969	1.3092	7.43508	5.83133e-76	1.85793e-74
GPATCH2	protein_coding	ENSG00000092978	-0.898679	4.57814	2.05125e-31	1.66191e-30
NUP50	protein_coding	ENSG00000093000	-0.725148	7.72726	5.19862e-27	3.56242e-26
CDC45	protein_coding	ENSG00000093009	0.908971	6.36688	9.21074e-42	1.09344e-40
ADA2	protein_coding	ENSG00000093072	5.5653	-3.30024	0.000765796	0.00143168
AC016026.1	processed_transcript	ENSG00000093100	1.18013	-0.881037	0.00042299	0.000815673
ECHDC1	protein_coding	ENSG00000093144	-0.683115	6.03151	1.27912e-24	7.96955e-24
CBX5	protein_coding	ENSG00000094916	0.85618	7.93217	8.89665e-38	9.17353e-37
SUCO	protein_coding	ENSG00000094975	-0.735924	6.32171	1.01605e-28	7.4524e-28
MAP3K1	protein_coding	ENSG00000095015	0.792301	3.99151	2.10485e-21	1.14679e-20
HOOK2	protein_coding	ENSG00000095066	1.02077	4.16365	7.34767e-36	7.10491e-35
EPB41L4B	protein_coding	ENSG00000095203	-0.834875	3.81383	2.20387e-21	1.19911e-20
CRAT	protein_coding	ENSG00000095321	1.18551	2.0345	3.93412e-21	2.12184e-20
SH2D3C	protein_coding	ENSG00000095370	3.17622	-0.385038	2.7669e-37	2.79791e-36
TBC1D2	protein_coding	ENSG00000095383	1.72361	4.12312	1.56001e-58	3.07748e-57
WHRN	protein_coding	ENSG00000095397	-0.645601	3.26409	2.21809e-11	7.38147e-11
PDE6C	protein_coding	ENSG00000095464	5.47686	-2.30723	8.63147e-13	3.10493e-12
SEMA4G	protein_coding	ENSG00000095539	1.2056	2.48457	1.5722e-28	1.14444e-27
IKZF5	protein_coding	ENSG00000095574	-0.768609	4.39438	1.28145e-24	7.98197e-24
TLL2	protein_coding	ENSG00000095587	1.20038	1.73588	1.11604e-17	5.19161e-17
CYP26A1	protein_coding	ENSG00000095596	6.05903	-3.99331	4.59486e-05	9.74864e-05
CRTAC1	protein_coding	ENSG00000095713	1.23267	0.497525	1.28273e-10	4.07827e-10
BAMBI	protein_coding	ENSG00000095739	-0.679205	3.01169	2.56467e-13	9.49512e-13
IL11	protein_coding	ENSG00000095752	-0.689101	6.87358	0.000230189	0.00045578
MYO3A	protein_coding	ENSG00000095777	2.25054	3.17428	1.49326e-107	1.0306e-105
HIVEP1	protein_coding	ENSG00000095951	-1.92169	5.08341	1.83805e-144	2.66706e-142
TREM2	protein_coding	ENSG00000095970	7.00563	-3.01247	6.43473e-09	1.83511e-08
FKBP5	protein_coding	ENSG00000096060	0.942612	5.98214	1.72534e-38	1.82674e-37
EFHC1	protein_coding	ENSG00000096093	1.57739	5.39159	3.91694e-117	3.34565e-115
HSP90AB1	protein_coding	ENSG00000096384	-1.49503	11.7467	6.98538e-105	4.60978e-103
ITPR3	protein_coding	ENSG00000096433	0.804696	6.70652	6.40328e-30	4.91353e-29
HNRNPH3	protein_coding	ENSG00000096746	-1.56501	8.97092	7.84584e-104	4.99954e-102
IL12RB1	protein_coding	ENSG00000096996	4.8099	-3.5064	0.0182142	0.0282702
PCSK5	protein_coding	ENSG00000099139	0.852372	4.70305	1.71211e-28	1.2444e-27
ABLIM1	protein_coding	ENSG00000099204	0.987103	7.40788	9.32185e-44	1.18177e-42
RAB18	protein_coding	ENSG00000099246	-0.591098	6.28334	6.21105e-18	2.93229e-17
NRP1	protein_coding	ENSG00000099250	-1.01769	7.1607	2.54062e-55	4.5163e-54
HSD17B7P2	transcribed_unprocessed_pseudogene	ENSG00000099251	2.20491	1.39047	9.57332e-38	9.85018e-37
PRTFDC1	protein_coding	ENSG00000099256	0.820455	3.47515	5.22684e-19	2.58096e-18
PALMD	protein_coding	ENSG00000099260	4.30007	-3.90226	6.20317e-06	1.42247e-05
H2AFY2	protein_coding	ENSG00000099284	0.795243	5.078	7.67106e-29	5.6644e-28
MAST3	protein_coding	ENSG00000099308	0.601747	3.54389	7.63753e-11	2.46272e-10
MZF1	protein_coding	ENSG00000099326	-1.40016	3.33053	4.67731e-43	5.81034e-42
OCEL1	protein_coding	ENSG00000099330	1.05397	1.92709	1.3224e-17	6.12789e-17
CATSPERG	protein_coding	ENSG00000099338	0.807152	0.951719	1.46918e-06	3.54555e-06
PSMD8	protein_coding	ENSG00000099341	-0.724967	7.76972	6.4376e-27	4.39644e-26
FBXL19	protein_coding	ENSG00000099364	-0.670172	6.19967	1.37621e-24	8.56114e-24
STX1B	protein_coding	ENSG00000099365	0.686665	2.18162	5.76317e-08	1.54173e-07
SETD1A	protein_coding	ENSG00000099381	-0.678954	6.15238	4.47113e-23	2.60765e-22
MAGEB2	protein_coding	ENSG00000099399	-1.01848	6.31037	4.52975e-56	8.21597e-55
HNRNPM	protein_coding	ENSG00000099783	-1.15127	8.88422	1.10553e-63	2.56047e-62
2019-03-02	protein_coding	ENSG00000099785	0.714761	2.27009	2.62457e-10	8.19841e-10
TIMM13	protein_coding	ENSG00000099800	-0.873073	5.19232	2.09967e-35	1.99035e-34
MTAP	protein_coding	ENSG00000099810	-1.02068	5.96889	1.56118e-47	2.24235e-46
MISP	protein_coding	ENSG00000099812	1.56109	4.92859	3.61481e-91	1.78133e-89
IZUMO4	protein_coding	ENSG00000099840	1.19104	-1.56777	0.00117477	0.00214028
RASSF7	protein_coding	ENSG00000099849	1.63635	3.82366	6.47979e-77	2.11776e-75
GADD45B	protein_coding	ENSG00000099860	0.63473	5.07778	2.30508e-19	1.15672e-18
PALM	protein_coding	ENSG00000099864	0.652964	4.75129	3.04722e-18	1.46008e-17
MADCAM1	protein_coding	ENSG00000099866	1.11611	-0.980535	1.46206e-05	3.24668e-05
IGF2-AS	antisense	ENSG00000099869	2.17905	-2.60727	0.000168878	0.000339093
ARVCF	protein_coding	ENSG00000099889	2.58013	5.54328	2.99046e-272	2.88125e-269
RANBP1	protein_coding	ENSG00000099901	-0.659693	8.72501	9.91712e-23	5.70104e-22
KLHL22	protein_coding	ENSG00000099910	2.64902	3.58082	1.23792e-154	2.20872e-152
SERPIND1	protein_coding	ENSG00000099937	-3.53913	-1.43286	3.27461e-07	8.3027e-07
LZTR1	protein_coding	ENSG00000099949	0.618382	4.09301	1.74022e-11	5.82015e-11
MMP11	protein_coding	ENSG00000099953	2.11585	-3.63231	0.000405998	0.000784476
CECR2	protein_coding	ENSG00000099954	-0.798023	4.63465	9.11897e-27	6.18554e-26
SMARCB1	protein_coding	ENSG00000099956	-0.615903	7.23116	4.6071e-22	2.58253e-21
P2RX6	protein_coding	ENSG00000099957	2.02345	1.36253	2.91483e-33	2.54742e-32
DDTL	protein_coding	ENSG00000099974	0.708983	0.140227	0.000251906	0.000497106
GSTT2	polymorphic_pseudogene	ENSG00000099984	1.84797	-0.358407	1.61274e-11	5.4013e-11
SUSD2	protein_coding	ENSG00000099994	1.38125	1.36949	4.67001e-17	2.11044e-16
SF3A1	protein_coding	ENSG00000099995	-0.815119	7.45721	3.43943e-37	3.46344e-36
GGT5	protein_coding	ENSG00000099998	1.90855	-2.31419	0.000559412	0.00106275
RNF215	protein_coding	ENSG00000099999	1.39242	4.51113	1.07988e-54	1.89171e-53
SPECC1L	protein_coding	ENSG00000100014	0.830087	5.59125	2.63367e-34	2.39838e-33
UPB1	protein_coding	ENSG00000100024	3.09769	-2.57717	5.69127e-07	1.41574e-06
YPEL1	protein_coding	ENSG00000100027	2.09203	1.4186	1.02594e-44	1.34669e-43
SNRPD3	protein_coding	ENSG00000100028	-0.694124	8.05506	6.64174e-16	2.82799e-15
PES1	protein_coding	ENSG00000100029	-1.35352	7.78226	2.18541e-87	9.83925e-86
GGT1	protein_coding	ENSG00000100031	1.817	3.96155	6.13832e-53	1.01633e-51
SLC35E4	protein_coding	ENSG00000100036	-1.33442	5.06013	4.1621e-81	1.52359e-79
TOP3B	protein_coding	ENSG00000100038	0.675306	5.47239	1.70923e-23	1.01205e-22
CRYBB3	protein_coding	ENSG00000100053	1.54925	0.119655	7.49963e-12	2.55833e-11
CYTH4	protein_coding	ENSG00000100055	-1.66696	1.04156	1.21624e-17	5.64461e-17
MFNG	protein_coding	ENSG00000100060	1.82864	2.71289	4.36768e-42	5.23144e-41
LRP5L	protein_coding	ENSG00000100068	-1.22227	3.84004	2.26005e-33	1.98461e-32
SLC25A1	protein_coding	ENSG00000100075	0.82674	5.93395	4.85067e-34	4.36941e-33
PLA2G3	protein_coding	ENSG00000100078	1.92818	-3.55254	0.0303113	0.0453202
HIRA	protein_coding	ENSG00000100084	-0.936573	4.09589	1.15402e-30	9.08097e-30
HPS4	protein_coding	ENSG00000100099	0.590782	7.84548	9.10781e-21	4.83109e-20
TFIP11	protein_coding	ENSG00000100109	-0.782622	7.14782	3.39211e-34	3.07395e-33
GCAT	protein_coding	ENSG00000100116	1.16492	3.38625	3.72822e-36	3.63276e-35
GGTLC2	protein_coding	ENSG00000100121	2.88852	-1.62253	2.63897e-13	9.76269e-13
SNU13	protein_coding	ENSG00000100138	-0.585946	6.15213	1.30789e-17	6.06296e-17
MICALL1	protein_coding	ENSG00000100139	0.801375	7.22813	2.96805e-32	2.4858e-31
POLR2F	protein_coding	ENSG00000100142	-0.805587	6.08752	1.64883e-32	1.40337e-31
PICK1	protein_coding	ENSG00000100151	0.942925	4.3355	7.24286e-32	5.98281e-31
TTC28	protein_coding	ENSG00000100154	2.37535	3.93643	1.28283e-135	1.57651e-133
2019-09-03	protein_coding	ENSG00000100167	1.30697	3.71024	2.70068e-53	4.52689e-52
TPTEP1	transcribed_unprocessed_pseudogene	ENSG00000100181	0.893836	4.7049	7.36309e-35	6.84768e-34
SLC5A4	protein_coding	ENSG00000100191	3.28537	-1.37562	2.86606e-15	1.18109e-14
KDELR3	protein_coding	ENSG00000100196	1.09252	5.46444	1.36045e-54	2.37975e-53
CYP2D6	protein_coding	ENSG00000100197	2.50445	-0.297006	2.4499e-16	1.06479e-15
DMC1	protein_coding	ENSG00000100206	1.02428	-0.942003	0.000901435	0.00166879
TCF20	protein_coding	ENSG00000100207	-0.857461	7.00696	9.61185e-36	9.24972e-35
CBY1	protein_coding	ENSG00000100211	0.675628	4.1749	5.84912e-17	2.63096e-16
TOMM22	protein_coding	ENSG00000100216	-0.98975	6.85079	2.69852e-45	3.61107e-44
RSPH14	protein_coding	ENSG00000100218	1.95409	-3.19881	0.000826096	0.00153749
RTCB	protein_coding	ENSG00000100220	-0.822169	7.22811	4.6091e-35	4.3215e-34
RAB36	protein_coding	ENSG00000100228	1.0299	3.59629	2.30165e-29	1.73033e-28
SUN2	protein_coding	ENSG00000100242	-1.10813	6.49345	1.28479e-56	2.36857e-55
DNAL4	protein_coding	ENSG00000100246	1.42109	2.15705	4.57996e-31	3.65411e-30
LMF2	protein_coding	ENSG00000100258	1.00779	6.12124	7.3722e-31	5.84318e-30
RASL10A	protein_coding	ENSG00000100276	1.49688	0.725873	1.67606e-07	4.33215e-07
CHKB	protein_coding	ENSG00000100288	1.01676	-1.23619	0.00416424	0.00709966
BIK	protein_coding	ENSG00000100290	-0.911075	-0.053418	4.89451e-05	0.000103443
HMOX1	protein_coding	ENSG00000100292	-1.2746	4.40572	1.38575e-66	3.47694e-65
MCM5	protein_coding	ENSG00000100297	-0.912235	7.06839	2.23997e-47	3.20203e-46
APOBEC3H	protein_coding	ENSG00000100298	2.03335	-1.53389	1.07303e-06	2.61865e-06
ARSA	protein_coding	ENSG00000100299	1.02986	4.79024	1.74654e-35	1.66083e-34
RASD2	protein_coding	ENSG00000100302	0.990499	2.60946	4.83241e-16	2.0682e-15
CBX7	protein_coding	ENSG00000100307	0.765854	4.18403	5.20548e-23	3.02641e-22
PDGFB	protein_coding	ENSG00000100311	-0.653809	2.35616	3.95216e-09	1.14556e-08
ACR	protein_coding	ENSG00000100312	1.46205	-2.31956	0.00595322	0.00992286
CABP7	protein_coding	ENSG00000100314	1.41578	1.53654	4.36757e-23	2.54885e-22
ZMAT5	protein_coding	ENSG00000100319	-0.61169	3.35808	1.60477e-11	5.37683e-11
SYNGR1	protein_coding	ENSG00000100321	0.993323	3.97073	3.47178e-31	2.77823e-30
TAB1	protein_coding	ENSG00000100324	1.01404	5.00976	2.49034e-44	3.22325e-43
MIEF1	protein_coding	ENSG00000100335	-0.841855	6.31381	2.45548e-39	2.6666e-38
APOL4	protein_coding	ENSG00000100336	1.82749	-1.22305	2.16669e-06	5.15905e-06
APOL1	protein_coding	ENSG00000100342	2.41929	4.74202	4.36097e-221	1.87576e-218
PNPLA3	protein_coding	ENSG00000100344	1.93955	4.18859	1.65143e-123	1.59751e-121
MYH9	protein_coding	ENSG00000100345	-0.615114	10.7567	1.22658e-18	5.9662e-18
FOXRED2	protein_coding	ENSG00000100350	0.681581	7.08814	4.235e-25	2.68655e-24
GRAP2	protein_coding	ENSG00000100351	1.02459	0.401819	1.96922e-06	4.70282e-06
EIF3D	protein_coding	ENSG00000100353	-0.881312	8.18211	9.5961e-43	1.18231e-41
PVALB	protein_coding	ENSG00000100362	2.27597	0.0315783	1.41311e-22	8.08687e-22
ST13	protein_coding	ENSG00000100380	-0.796163	8.46408	5.59317e-32	4.63442e-31
EP300	protein_coding	ENSG00000100393	-1.29748	7.30481	2.22273e-87	9.98861e-86
POLR3H	protein_coding	ENSG00000100413	-0.927812	6.63678	5.11586e-45	6.78183e-44
PMM1	protein_coding	ENSG00000100417	0.949936	4.37461	4.57791e-36	4.45168e-35
BRD1	protein_coding	ENSG00000100425	-0.679235	5.71214	1.83489e-24	1.13587e-23
MLC1	protein_coding	ENSG00000100427	1.67328	0.711787	1.86321e-14	7.36086e-14
HDAC10	protein_coding	ENSG00000100429	1.48714	-1.0072	9.83173e-08	2.58986e-07
KCNK10	protein_coding	ENSG00000100433	1.26027	-0.758209	3.08138e-06	7.24534e-06
ABHD4	protein_coding	ENSG00000100439	2.39002	4.93122	7.21083e-212	2.75694e-209
RBM23	protein_coding	ENSG00000100461	0.752402	4.29184	2.88519e-22	1.6325e-21
PRMT5	protein_coding	ENSG00000100462	-1.0646	7.01071	4.89232e-58	9.52638e-57
VCPKMT	protein_coding	ENSG00000100483	-0.609055	3.4832	4.79843e-12	1.65327e-11
TRIM9	protein_coding	ENSG00000100505	-0.879208	2.58685	1.94142e-17	8.92762e-17
PSMC6	protein_coding	ENSG00000100519	-1.04246	7.48645	2.61448e-54	4.55021e-53
GNPNAT1	protein_coding	ENSG00000100522	-1.00154	7.11992	9.97e-50	1.51322e-48
CDKN3	protein_coding	ENSG00000100526	-1.56366	6.60291	1.10072e-109	7.96189e-108
ATP6V1D	protein_coding	ENSG00000100554	-0.742809	6.50768	7.58826e-30	5.80433e-29
CCDC198	protein_coding	ENSG00000100557	1.03763	0.254286	1.79887e-08	4.97009e-08
VTI1B	protein_coding	ENSG00000100568	-0.655158	6.43991	1.66728e-22	9.50078e-22
TMED8	protein_coding	ENSG00000100580	1.81781	4.97134	2.1755e-134	2.63323e-132
AHSA1	protein_coding	ENSG00000100591	-0.898088	7.9138	5.22635e-41	6.04065e-40
ISM2	protein_coding	ENSG00000100593	0.95954	1.00693	8.35675e-09	2.36532e-08
SNW1	protein_coding	ENSG00000100603	-0.721503	7.17822	1.84572e-26	1.23597e-25
CHGA	protein_coding	ENSG00000100604	0.895656	0.175107	7.49262e-05	0.000155582
GALNT16	protein_coding	ENSG00000100626	1.19713	6.10977	2.48464e-70	6.87902e-69
ASB2	protein_coding	ENSG00000100628	-4.1587	-1.6951	4.60943e-11	1.50505e-10
SUSD6	protein_coding	ENSG00000100647	0.68241	4.96844	1.48579e-22	8.48462e-22
EIF5	protein_coding	ENSG00000100664	-0.655896	8.26404	6.06886e-23	3.51818e-22
SLC8A3	protein_coding	ENSG00000100678	1.14705	-0.149115	1.59779e-06	3.84245e-06
ZFYVE21	protein_coding	ENSG00000100711	0.936237	4.55925	1.13092e-34	1.0449e-33
TCL1A	protein_coding	ENSG00000100721	1.73351	-3.13839	0.0123024	0.0195906
TELO2	protein_coding	ENSG00000100726	0.754115	5.70136	6.04592e-21	3.22901e-20
BDKRB1	protein_coding	ENSG00000100739	-0.82307	-2.15916	0.0211597	0.0324778
VRK1	protein_coding	ENSG00000100749	0.818957	4.2602	1.01728e-23	6.09531e-23
PSMC1	protein_coding	ENSG00000100764	-1.3111	7.02865	5.9887e-85	2.49567e-83
PAPLN	protein_coding	ENSG00000100767	1.65544	3.44514	1.28733e-68	3.44915e-67
RPS6KA5	protein_coding	ENSG00000100784	-0.619121	2.38148	2.79608e-08	7.6377e-08
PPP4R3A	protein_coding	ENSG00000100796	-1.39735	6.64228	5.34003e-98	3.04799e-96
C14orf93	protein_coding	ENSG00000100802	1.64971	3.14398	2.35653e-57	4.48e-56
YY1	protein_coding	ENSG00000100811	-1.23617	7.0169	7.16479e-77	2.33846e-75
APEX1	protein_coding	ENSG00000100823	-0.748024	7.92848	1.19983e-30	9.43221e-30
ARHGAP5	protein_coding	ENSG00000100852	-0.846273	6.94727	5.17477e-34	4.65962e-33
DHRS2	protein_coding	ENSG00000100867	-2.36191	10.8172	2.25055e-227	1.12935e-224
SRP54	protein_coding	ENSG00000100883	-0.678053	6.32296	1.08477e-20	5.74259e-20
PCK2	protein_coding	ENSG00000100889	1.46481	5.34935	1.23792e-96	6.85466e-95
DCAF11	protein_coding	ENSG00000100897	-0.689697	5.08596	1.34191e-21	7.37957e-21
PSMA6	protein_coding	ENSG00000100902	-0.621453	2.41867	1.4076e-06	3.40068e-06
NFKBIA	protein_coding	ENSG00000100906	-1.77817	4.74015	1.76492e-58	3.47601e-57
PNN	protein_coding	ENSG00000100941	-0.726195	7.98496	2.78484e-26	1.85095e-25
RABGGTA	protein_coding	ENSG00000100949	0.700432	3.45325	1.45643e-14	5.79087e-14
NFATC4	protein_coding	ENSG00000100968	1.61147	3.77356	9.87152e-60	2.02362e-58
PLTP	protein_coding	ENSG00000100979	1.20976	-0.739558	6.67378e-05	0.000139179
MMP9	protein_coding	ENSG00000100985	-1.70553	6.15919	2.83616e-145	4.24314e-143
GINS1	protein_coding	ENSG00000101003	0.605314	5.28018	3.97548e-18	1.89319e-17
NINL	protein_coding	ENSG00000101004	1.79061	4.69033	1.74707e-116	1.47655e-114
NFATC2	protein_coding	ENSG00000101096	-2.77752	4.22588	6.77629e-241	4.08051e-238
PABPC1L	protein_coding	ENSG00000101104	2.26164	6.26977	8.71562e-55	1.5279e-53
STK4	protein_coding	ENSG00000101109	-0.611936	6.9836	7.99391e-21	4.24866e-20
ADNP	protein_coding	ENSG00000101126	-0.883138	7.3238	2.35727e-39	2.56457e-38
PFDN4	protein_coding	ENSG00000101132	-0.807561	5.69217	3.54745e-24	2.17147e-23
BMP7	protein_coding	ENSG00000101144	1.11746	3.77129	5.03713e-40	5.64323e-39
NELFCD	protein_coding	ENSG00000101158	-0.645321	6.81479	1.13369e-24	7.07807e-24
PRPF6	protein_coding	ENSG00000101161	-1.25789	6.73252	5.35219e-77	1.75638e-75
PRELID3B	protein_coding	ENSG00000101166	-0.873011	6.25379	7.67524e-36	7.41273e-35
PSMA7	protein_coding	ENSG00000101182	-0.662833	8.00479	8.79136e-23	5.06718e-22
MRGBP	protein_coding	ENSG00000101189	-0.619942	5.93283	7.4614e-21	3.97178e-20
BIRC7	protein_coding	ENSG00000101197	4.11298	-1.30487	2.11214e-12	7.42811e-12
NKAIN4	protein_coding	ENSG00000101198	1.39224	-0.787833	2.2137e-05	4.84079e-05
COL20A1	protein_coding	ENSG00000101203	1.32957	-1.19487	0.00089687	0.00166128
PTK6	protein_coding	ENSG00000101213	2.34922	-3.24516	0.0189552	0.029356
C20orf27	protein_coding	ENSG00000101220	-0.708262	5.3722	2.64779e-24	1.63004e-23
CSNK2A1	protein_coding	ENSG00000101266	-0.953636	7.80401	2.3122e-47	3.30136e-46
SLC52A3	protein_coding	ENSG00000101276	2.18904	-2.02758	1.52183e-05	3.37597e-05
ANGPT4	protein_coding	ENSG00000101280	1.58946	-1.55144	4.35909e-05	9.27294e-05
RSPO4	protein_coding	ENSG00000101282	1.18313	4.26676	1.71762e-48	2.51809e-47
CDS2	protein_coding	ENSG00000101290	0.785497	5.27165	7.19971e-31	5.7121e-30
PROKR2	protein_coding	ENSG00000101292	-1.66469	0.0508526	1.64181e-12	5.80368e-12
SNPH	protein_coding	ENSG00000101298	0.672894	4.04298	1.19061e-15	4.99795e-15
SEC23B	protein_coding	ENSG00000101310	0.63935	5.73472	1.68023e-21	9.2023e-21
CCM2L	protein_coding	ENSG00000101331	1.26522	0.482045	9.60077e-12	3.25526e-11
PLCB4	protein_coding	ENSG00000101333	0.716202	1.43398	5.58108e-06	1.28557e-05
HCK	protein_coding	ENSG00000101336	1.35951	-2.01699	0.000741434	0.00138861
SAMHD1	protein_coding	ENSG00000101347	0.810727	5.00263	3.8381e-30	2.96309e-29
PAK5	protein_coding	ENSG00000101349	1.55496	-1.52388	3.40885e-06	7.98259e-06
KIF3B	protein_coding	ENSG00000101350	-0.924491	7.09138	2.11908e-42	2.5766e-41
NOP56	protein_coding	ENSG00000101361	-0.897085	7.57435	2.21691e-41	2.59218e-40
IDH3B	protein_coding	ENSG00000101365	-0.770612	6.10472	5.54126e-31	4.41085e-30
MAPRE1	protein_coding	ENSG00000101367	-0.721907	7.61555	1.18932e-25	7.71537e-25
JAG1	protein_coding	ENSG00000101384	-2.07196	5.7538	1.61302e-197	5.25038e-195
SNTA1	protein_coding	ENSG00000101400	0.92615	4.47203	1.27957e-28	9.34818e-28
E2F1	protein_coding	ENSG00000101412	0.932312	5.39994	2.0624e-42	2.50894e-41
PXMP4	protein_coding	ENSG00000101417	1.76465	2.38524	3.13221e-52	5.10458e-51
CHMP4B	protein_coding	ENSG00000101421	-0.773407	6.87765	8.82346e-33	7.57685e-32
SLC32A1	protein_coding	ENSG00000101438	-2.29563	-2.0439	1.02192e-07	2.68723e-07
PPP1R16B	protein_coding	ENSG00000101445	3.31038	2.57257	3.55731e-152	5.99195e-150
FAM83D	protein_coding	ENSG00000101447	2.25908	6.36616	3.79194e-214	1.54807e-211
DNTTIP1	protein_coding	ENSG00000101457	-0.591456	5.2878	1.8564e-18	8.97531e-18
SYNDIG1	protein_coding	ENSG00000101463	2.86836	-0.0738206	4.90459e-25	3.1007e-24
TNNC2	protein_coding	ENSG00000101470	1.39933	-2.75014	0.029347	0.0439739
CELF4	protein_coding	ENSG00000101489	1.16552	0.756687	1.48563e-13	5.57477e-13
ADNP2	protein_coding	ENSG00000101544	-1.01571	7.1303	4.57477e-53	7.59424e-52
VAPA	protein_coding	ENSG00000101558	-0.769653	7.19361	5.70743e-33	4.92742e-32
LPIN2	protein_coding	ENSG00000101577	1.81194	6.04831	4.57225e-149	7.19815e-147
MYL12A	protein_coding	ENSG00000101608	-1.06719	7.66501	3.57565e-52	5.80368e-51
ST8SIA5	protein_coding	ENSG00000101638	1.21097	-1.68097	0.00120833	0.00219876
CEP192	protein_coding	ENSG00000101639	0.611998	6.79105	1.40823e-20	7.41095e-20
RNMT	protein_coding	ENSG00000101654	-1.04265	6.82956	8.15031e-56	1.4695e-54
ANKRD12	protein_coding	ENSG00000101745	-0.769342	5.74349	9.66741e-26	6.29348e-25
NOL4	protein_coding	ENSG00000101746	0.659439	-1.2527	0.0149989	0.0235652
CSTF2	protein_coding	ENSG00000101811	-1.02026	6.19717	1.00039e-49	1.5174e-48
TBL1X	protein_coding	ENSG00000101849	-1.00998	5.97734	2.42469e-52	3.96494e-51
PGRMC1	protein_coding	ENSG00000101856	-0.731541	7.34913	2.97544e-30	2.30898e-29
NXT2	protein_coding	ENSG00000101888	-0.922902	3.45707	1.33356e-25	8.63249e-25
ATP1B4	protein_coding	ENSG00000101892	-2.03578	-2.35019	0.0110346	0.0176852
ALG13	protein_coding	ENSG00000101901	-0.655828	4.13946	1.51629e-16	6.66232e-16
AMMECR1	protein_coding	ENSG00000101935	0.736539	3.33117	7.25678e-15	2.92984e-14
PAGE4	protein_coding	ENSG00000101951	2.94786	-3.82789	0.0188202	0.0291563
XIAP	protein_coding	ENSG00000101966	-0.703186	5.11087	2.94328e-22	1.66459e-21
MCF2	protein_coding	ENSG00000101977	0.925996	-0.469143	5.69649e-05	0.000119522
ABCD1	protein_coding	ENSG00000101986	1.35906	3.89813	4.96196e-54	8.53096e-53
RENBP	protein_coding	ENSG00000102032	0.870126	-0.72903	0.00137464	0.00248339
MTMR8	protein_coding	ENSG00000102043	0.780939	1.14626	1.73726e-07	4.48504e-07
ZC3H12B	protein_coding	ENSG00000102053	2.22824	1.21953	7.97922e-44	1.01369e-42
KCND1	protein_coding	ENSG00000102057	0.959063	3.01856	1.90988e-16	8.35208e-16
PIM2	protein_coding	ENSG00000102096	-0.814802	0.787292	1.30586e-05	2.91404e-05
SCML2	protein_coding	ENSG00000102098	1.26318	3.3956	1.1609e-42	1.42739e-41
PCSK1N	protein_coding	ENSG00000102109	0.967342	4.21122	9.32196e-25	5.83216e-24
TAZ	protein_coding	ENSG00000102125	1.22037	3.87333	1.64334e-41	1.93466e-40
PGK1	protein_coding	ENSG00000102144	-0.978755	8.91464	3.35328e-48	4.88925e-47
SMS	protein_coding	ENSG00000102172	-1.15815	7.74718	8.31345e-61	1.7674e-59
EEA1	protein_coding	ENSG00000102189	0.92794	5.90441	5.95233e-38	6.16397e-37
USP11	protein_coding	ENSG00000102226	0.670548	6.58628	1.71051e-24	1.06079e-23
PCYT1B	protein_coding	ENSG00000102230	1.46071	0.103958	1.77855e-11	5.94504e-11
HTATSF1	protein_coding	ENSG00000102241	-1.12913	6.68991	2.78783e-53	4.66972e-52
FGD1	protein_coding	ENSG00000102302	1.4468	4.60645	8.42729e-78	2.82713e-76
ITIH6	protein_coding	ENSG00000102313	2.41445	-3.53392	0.00112426	0.00205556
RBM3	protein_coding	ENSG00000102317	-0.98483	7.84911	4.46965e-41	5.18096e-40
KLF8	protein_coding	ENSG00000102349	1.87431	-0.708782	1.94415e-11	6.48957e-11
ZDHHC15	protein_coding	ENSG00000102383	1.23921	1.69611	1.6665e-21	9.13124e-21
CENPI	protein_coding	ENSG00000102384	2.35606	4.68912	7.86161e-183	2.05829e-180
DRP2	protein_coding	ENSG00000102385	1.23115	2.13433	9.71672e-18	4.52964e-17
TAF7L	protein_coding	ENSG00000102387	-2.86197	-3.61378	0.00389944	0.00667039
PBDC1	protein_coding	ENSG00000102390	-1.43159	5.3942	1.20481e-68	3.23166e-67
HTR2A	protein_coding	ENSG00000102468	4.93458	-0.0190463	8.43415e-77	2.74161e-75
FNDC3A	protein_coding	ENSG00000102531	-0.691705	6.47819	7.7644e-26	5.07382e-25
CAB39L	protein_coding	ENSG00000102547	-0.95363	1.96259	8.88597e-15	3.57025e-14
KLF5	protein_coding	ENSG00000102554	-1.58891	6.41082	5.78188e-95	3.1226e-93
STK24	protein_coding	ENSG00000102572	-0.634859	6.4321	2.90155e-22	1.64137e-21
ARHGEF7	protein_coding	ENSG00000102606	-0.595454	5.37194	4.13322e-18	1.96597e-17
FGF9	protein_coding	ENSG00000102678	0.616974	-0.551123	0.0249179	0.0378006
SGCG	protein_coding	ENSG00000102683	1.90818	-2.80314	0.000493421	0.000943481
KPNA3	protein_coding	ENSG00000102753	-0.820771	6.24283	5.12853e-35	4.79732e-34
RGCC	protein_coding	ENSG00000102760	0.760944	0.481412	3.04936e-05	6.57917e-05
DHRS12	protein_coding	ENSG00000102796	1.40008	-1.38539	1.58507e-05	3.50818e-05
MEDAG	protein_coding	ENSG00000102802	4.80907	-2.56478	0.0183259	0.0284326
TSC22D1	protein_coding	ENSG00000102804	-1.22697	5.7778	4.86721e-66	1.20119e-64
MSLN	protein_coding	ENSG00000102854	0.90918	3.84278	1.69099e-23	1.0015e-22
TRADD	protein_coding	ENSG00000102871	0.651868	2.92639	1.69923e-10	5.3713e-10
HSF4	protein_coding	ENSG00000102878	3.10199	1.93631	6.59795e-53	1.09152e-51
CORO1A	protein_coding	ENSG00000102879	0.89872	2.74678	2.54474e-16	1.10481e-15
GDPD3	protein_coding	ENSG00000102886	1.4481	0.58941	6.01626e-12	2.06224e-11
CENPT	protein_coding	ENSG00000102901	0.930575	5.2495	1.04121e-33	9.25787e-33
TSNAXIP1	protein_coding	ENSG00000102904	1.3725	-1.14179	3.45209e-05	7.41026e-05
N4BP1	protein_coding	ENSG00000102921	1.09194	5.09451	6.93962e-50	1.05594e-48
ARL2BP	protein_coding	ENSG00000102931	0.59658	5.47181	1.76433e-18	8.53703e-18
ZNF423	protein_coding	ENSG00000102935	1.24777	0.221044	3.79758e-09	1.10314e-08
DHODH	protein_coding	ENSG00000102967	-0.871887	3.79681	5.22224e-26	3.43777e-25
POLR2C	protein_coding	ENSG00000102978	-0.744301	5.68119	1.39932e-28	1.02076e-27
PARD6A	protein_coding	ENSG00000102981	1.19351	-0.410451	9.99224e-08	2.63013e-07
ZNF821	protein_coding	ENSG00000102984	0.732205	2.59822	2.29974e-11	7.64474e-11
MMP15	protein_coding	ENSG00000102996	1.61969	4.17158	9.91065e-85	4.10168e-83
NME3	protein_coding	ENSG00000103024	1.01112	3.53852	4.24917e-25	2.69483e-24
NDRG4	protein_coding	ENSG00000103034	1.56864	3.40928	2.57419e-65	6.25675e-64
PSMD7	protein_coding	ENSG00000103035	-1.09947	7.25486	8.90289e-58	1.72106e-56
HAS3	protein_coding	ENSG00000103044	2.05144	1.05954	2.33074e-33	2.04519e-32
SMPD3	protein_coding	ENSG00000103056	-2.59394	0.285447	2.28438e-41	2.66847e-40
SLC7A6OS	protein_coding	ENSG00000103061	-0.708674	4.94681	2.07808e-23	1.22653e-22
SLC7A6	protein_coding	ENSG00000103064	-0.60232	6.62311	8.92423e-21	4.7358e-20
MLYCD	protein_coding	ENSG00000103150	1.97069	1.14624	7.84572e-29	5.78628e-28
NECAB2	protein_coding	ENSG00000103154	1.37107	1.73111	2.65025e-23	1.55889e-22
HSDL1	protein_coding	ENSG00000103160	1.03485	5.23356	3.641e-52	5.90578e-51
TAF1C	protein_coding	ENSG00000103168	0.637063	5.63778	1.08318e-14	4.33252e-14
COTL1	protein_coding	ENSG00000103187	-0.828987	8.37837	1.15311e-33	1.02377e-32
ABCC1	protein_coding	ENSG00000103222	-0.629158	6.11472	3.39313e-22	1.91361e-21
LMF1	protein_coding	ENSG00000103227	0.679999	-0.189059	0.00434464	0.00737902
CIAO3	protein_coding	ENSG00000103245	1.13671	3.78257	3.19225e-41	3.71996e-40
CLCN7	protein_coding	ENSG00000103249	0.702441	5.75345	2.58721e-15	1.06929e-14
HAGHL	protein_coding	ENSG00000103253	1.07925	3.15258	6.5635e-28	4.65944e-27
SLC7A5	protein_coding	ENSG00000103257	-1.00485	10.1024	1.31651e-50	2.05381e-49
METRN	protein_coding	ENSG00000103260	0.794276	4.10828	3.81176e-19	1.89229e-18
RHBDL1	protein_coding	ENSG00000103269	2.04676	1.2432	1.19171e-13	4.49423e-13
NUBP1	protein_coding	ENSG00000103274	-0.850254	5.19741	9.78546e-34	8.70714e-33
CAPN15	protein_coding	ENSG00000103326	-1.27989	6.42496	9.65145e-70	2.63876e-68
GSPT1	protein_coding	ENSG00000103342	-1.06097	8.17021	4.6061e-60	9.49889e-59
CLUAP1	protein_coding	ENSG00000103351	-0.775719	4.25284	8.49879e-23	4.90324e-22
UBFD1	protein_coding	ENSG00000103353	-0.778501	6.58662	5.489e-34	4.93334e-33
TOX3	protein_coding	ENSG00000103460	1.17531	0.457591	1.04417e-09	3.14033e-09
QPRT	protein_coding	ENSG00000103485	1.31183	5.6506	2.69174e-85	1.13947e-83
XYLT1	protein_coding	ENSG00000103489	1.29907	4.74638	1.29404e-46	1.81429e-45
MAZ	protein_coding	ENSG00000103495	-0.886908	7.54586	3.77949e-43	4.71204e-42
CDIPT	protein_coding	ENSG00000103502	1.02036	4.56855	2.61967e-42	3.16926e-41
IL21R	protein_coding	ENSG00000103522	2.21695	1.31119	1.00398e-43	1.27144e-42
SYT17	protein_coding	ENSG00000103528	2.11097	3.50155	2.13103e-107	1.46658e-105
TMC5	protein_coding	ENSG00000103534	0.745386	1.24084	7.27288e-07	1.79662e-06
SLC6A2	protein_coding	ENSG00000103546	2.97475	-2.66367	3.62377e-07	9.14849e-07
RNF40	protein_coding	ENSG00000103549	-0.691055	7.02046	3.88542e-26	2.56898e-25
LACTB	protein_coding	ENSG00000103642	1.03323	5.99574	5.44857e-51	8.57216e-50
TRIP4	protein_coding	ENSG00000103671	-0.66491	4.52367	2.50885e-17	1.14742e-16
AP3B2	protein_coding	ENSG00000103723	2.17856	1.5465	1.3646e-47	1.96351e-46
IGDCC4	protein_coding	ENSG00000103742	0.918328	4.48556	7.86558e-31	6.23218e-30
RAB11A	protein_coding	ENSG00000103769	-0.621133	6.94491	9.08877e-20	4.63424e-19
CTSH	protein_coding	ENSG00000103811	0.846686	2.91069	4.30505e-17	1.94697e-16
CD276	protein_coding	ENSG00000103855	-0.926754	7.06281	3.6713e-45	4.88836e-44
EHD4	protein_coding	ENSG00000103966	-0.717888	6.41463	6.5042e-27	4.44066e-26
TMEM87A	protein_coding	ENSG00000103978	-1.03488	5.51429	7.44665e-49	1.10448e-47
CEP152	protein_coding	ENSG00000103995	1.00951	5.10648	3.96665e-47	5.64019e-46
ATP8B4	protein_coding	ENSG00000104043	2.92341	0.670713	1.65343e-28	1.20285e-27
OCA2	protein_coding	ENSG00000104044	1.62659	-1.57557	3.85298e-06	8.98506e-06
TGM5	protein_coding	ENSG00000104055	0.893038	-1.7194	0.00991279	0.0159808
FAM189A1	protein_coding	ENSG00000104059	1.059	-1.14286	0.0120511	0.0192133
BMF	protein_coding	ENSG00000104081	-0.840586	0.495557	7.1914e-07	1.77734e-06
DMXL2	protein_coding	ENSG00000104093	2.25472	4.81024	2.40711e-164	4.87227e-162
SCG3	protein_coding	ENSG00000104112	1.27795	-2.53801	0.0297108	0.0444845
EIF3J	protein_coding	ENSG00000104131	-1.27791	7.59716	2.97817e-68	7.88298e-67
RHOV	protein_coding	ENSG00000104140	-0.679095	0.454708	0.000635677	0.00120081
SLC30A4	protein_coding	ENSG00000104154	1.96364	3.24163	5.187e-93	2.70431e-91
PDGFRL	protein_coding	ENSG00000104213	1.09474	3.13274	3.3787e-32	2.82677e-31
ZFAND1	protein_coding	ENSG00000104231	-0.595582	5.29296	3.50942e-16	1.51138e-15
RP1	protein_coding	ENSG00000104237	1.00419	-0.270326	2.45929e-05	5.35209e-05
FZD3	protein_coding	ENSG00000104290	0.613911	4.32565	2.35209e-14	9.24676e-14
EYA1	protein_coding	ENSG00000104313	0.590963	1.81683	7.6584e-06	1.7424e-05
NBN	protein_coding	ENSG00000104320	-0.665813	6.43958	6.85552e-22	3.81448e-21
TRPA1	protein_coding	ENSG00000104321	0.853293	3.0647	2.42029e-17	1.1079e-16
CALB1	protein_coding	ENSG00000104327	-1.90888	-0.815962	3.52996e-10	1.0926e-09
IMPAD1	protein_coding	ENSG00000104331	-0.845674	7.58108	1.1605e-40	1.32478e-39
RAB2A	protein_coding	ENSG00000104388	-0.650662	6.51764	2.71593e-22	1.53745e-21
EIF3E	protein_coding	ENSG00000104408	-0.799084	8.81239	2.89232e-32	2.42321e-31
EMC2	protein_coding	ENSG00000104412	-0.610864	5.09035	1.17821e-11	3.97808e-11
ESRP1	protein_coding	ENSG00000104413	1.17064	-2.91535	0.0234892	0.0357956
WISP1	protein_coding	ENSG00000104415	3.22103	1.82973	1.0172e-98	5.87559e-97
NDRG1	protein_coding	ENSG00000104419	-0.890934	6.88323	5.46783e-40	6.1087e-39
SPAG1	protein_coding	ENSG00000104450	0.682641	4.84584	1.64926e-20	8.65861e-20
NCALD	protein_coding	ENSG00000104490	2.58058	-1.57962	1.34346e-11	4.52271e-11
UBR5	protein_coding	ENSG00000104517	-0.679476	7.72312	4.36319e-24	2.66201e-23
GSDMD	protein_coding	ENSG00000104518	1.54229	5.59934	7.52568e-105	4.9499e-103
ERI1	protein_coding	ENSG00000104626	-0.64428	5.76271	1.36154e-21	7.48582e-21
MTMR9	protein_coding	ENSG00000104643	-0.612467	4.71145	9.82515e-17	4.36398e-16
DCTN6	protein_coding	ENSG00000104671	-0.636699	3.85641	1.65901e-12	5.86103e-12
UBXN8	protein_coding	ENSG00000104691	-1.62126	3.32925	7.14737e-72	2.06922e-70
PPP2CB	protein_coding	ENSG00000104695	-0.805997	6.5299	7.00591e-34	6.26862e-33
NEFM	protein_coding	ENSG00000104722	-2.63635	-2.40528	1.1583e-05	2.59486e-05
ARHGEF10	protein_coding	ENSG00000104728	0.777869	0.169362	8.2051e-05	0.000169732
KCTD9	protein_coding	ENSG00000104756	-0.703465	6.13859	3.66526e-24	2.24302e-23
BNIP3L	protein_coding	ENSG00000104765	-0.645193	6.59742	2.63742e-21	1.43112e-20
MAP4K1	protein_coding	ENSG00000104814	1.91286	-0.975499	1.01148e-08	2.84787e-08
TUBB4A	protein_coding	ENSG00000104833	0.908233	3.40889	5.1023e-24	3.10273e-23
CLPTM1	protein_coding	ENSG00000104853	-0.595998	7.54328	3.83265e-19	1.90227e-18
RELB	protein_coding	ENSG00000104856	-1.38009	4.67923	8.6219e-58	1.66942e-56
LIN7B	protein_coding	ENSG00000104863	1.61687	1.17638	1.30498e-22	7.47516e-22
FCGRT	protein_coding	ENSG00000104870	0.996238	2.74543	5.62354e-22	3.13987e-21
CKM	protein_coding	ENSG00000104879	4.99446	-4.06313	0.0101417	0.0163301
PPP1R13L	protein_coding	ENSG00000104881	0.764693	6.65043	1.54982e-28	1.12849e-27
PEX11G	protein_coding	ENSG00000104883	2.24744	-1.71421	9.75354e-08	2.57039e-07
DOT1L	protein_coding	ENSG00000104885	-1.03979	6.36782	2.04586e-54	3.5735e-53
PLEKHJ1	protein_coding	ENSG00000104886	0.647316	4.58447	7.99734e-19	3.91847e-18
SLC17A7	protein_coding	ENSG00000104888	0.637505	2.41566	4.79302e-08	1.28879e-07
RNASEH2A	protein_coding	ENSG00000104889	0.886533	-0.477213	0.000174243	0.00034937
DKKL1	protein_coding	ENSG00000104901	0.982931	-1.80926	0.00810302	0.013244
LYL1	protein_coding	ENSG00000104903	-5.66297	-4.15616	0.00107978	0.00197965
OAZ1	protein_coding	ENSG00000104904	-0.612965	7.05786	3.35668e-20	1.73913e-19
TRMT1	protein_coding	ENSG00000104907	-0.789093	5.34852	2.7638e-25	1.76583e-24
FCER2	protein_coding	ENSG00000104921	0.983657	-2.09784	0.0253769	0.0384653
IL4I1	protein_coding	ENSG00000104951	-3.19911	0.519807	2.55588e-44	3.30453e-43
TLE6	protein_coding	ENSG00000104953	0.858821	-0.0403189	5.2488e-05	0.000110569
SGTA	protein_coding	ENSG00000104969	-0.76827	6.72089	8.82957e-34	7.87112e-33
ASF1B	protein_coding	ENSG00000105011	1.88712	4.78084	4.75577e-139	6.29408e-137
PPP6R1	protein_coding	ENSG00000105063	-0.687047	7.17384	1.04406e-25	6.78948e-25
MED26	protein_coding	ENSG00000105085	-1.09002	2.62456	3.13574e-24	1.92386e-23
OLFM2	protein_coding	ENSG00000105088	2.03822	5.37873	7.86687e-173	1.8397e-170
AKAP8	protein_coding	ENSG00000105127	-0.844982	5.45759	7.99246e-36	7.71292e-35
SLC1A6	protein_coding	ENSG00000105143	0.701435	0.332492	0.000194878	0.0003889
CCNE1	protein_coding	ENSG00000105173	1.16567	6.31855	2.81264e-67	7.1843e-66
URI1	protein_coding	ENSG00000105176	-0.82962	7.5379	2.67117e-37	2.70338e-36
ANKRD27	protein_coding	ENSG00000105186	-0.688506	5.67997	2.09286e-23	1.23465e-22
FBL	protein_coding	ENSG00000105202	-0.707377	7.16808	6.37987e-24	3.85916e-23
DYRK1B	protein_coding	ENSG00000105204	-0.767875	2.51852	6.54118e-11	2.1197e-10
EBI3	protein_coding	ENSG00000105246	2.15141	2.86398	2.01773e-83	8.01999e-82
YJU2	protein_coding	ENSG00000105248	-0.933185	4.10746	8.21143e-31	6.49766e-30
OVOL3	protein_coding	ENSG00000105261	1.75954	-2.97436	0.00874332	0.0142134
TJP3	protein_coding	ENSG00000105289	1.52938	-0.880984	1.59675e-07	4.13469e-07
APLP1	protein_coding	ENSG00000105290	1.98246	5.63914	6.37099e-164	1.27882e-161
CACTIN	protein_coding	ENSG00000105298	-0.685212	5.69902	2.76158e-25	1.76487e-24
CCDC9	protein_coding	ENSG00000105321	-0.832033	4.78985	1.08164e-29	8.22393e-29
HNRNPUL1	protein_coding	ENSG00000105323	-0.749486	9.19491	3.98339e-30	3.07132e-29
FZR1	protein_coding	ENSG00000105325	1.04189	5.42638	2.03597e-47	2.91387e-46
DENND3	protein_coding	ENSG00000105339	1.23963	4.8153	8.97613e-63	2.02253e-61
PLIN3	protein_coding	ENSG00000105355	-0.988581	7.22176	2.06184e-51	3.27596e-50
CD79A	protein_coding	ENSG00000105369	-2.12494	-2.27995	3.33042e-07	8.44241e-07
ETFB	protein_coding	ENSG00000105379	0.680497	2.24015	4.03021e-09	1.16762e-08
CD33	protein_coding	ENSG00000105383	0.8081	2.56734	2.19393e-14	8.63626e-14
RABAC1	protein_coding	ENSG00000105404	0.699086	1.10575	9.11721e-06	2.06106e-05
PTPRS	protein_coding	ENSG00000105426	0.774107	6.97973	4.28138e-29	3.18584e-28
CNFN	protein_coding	ENSG00000105427	1.37186	0.0778762	1.21792e-10	3.87787e-10
CYTH2	protein_coding	ENSG00000105443	1.27225	5.67115	8.14471e-69	2.18953e-67
GRWD1	protein_coding	ENSG00000105447	-0.857931	6.64028	4.30294e-39	4.64359e-38
SYNGR4	protein_coding	ENSG00000105467	1.15742	-2.09778	0.0140635	0.0221854
CCDC114	protein_coding	ENSG00000105479	2.84935	-0.372977	2.72002e-26	1.80937e-25
RAB3D	protein_coding	ENSG00000105514	-1.06397	-0.512708	3.95197e-05	8.44193e-05
DBP	protein_coding	ENSG00000105516	-0.61765	1.92358	1.03017e-07	2.70774e-07
CAPS	protein_coding	ENSG00000105519	3.20509	-1.35244	4.8204e-15	1.96097e-14
RASIP1	protein_coding	ENSG00000105538	1.99882	0.383433	7.65647e-17	3.41774e-16
THEG	protein_coding	ENSG00000105549	-3.2613	-3.65582	0.00936724	0.01515
FGF21	protein_coding	ENSG00000105550	4.06727	1.23492	4.07249e-109	2.90219e-107
PLEKHA4	protein_coding	ENSG00000105559	0.686318	3.6955	1.58387e-14	6.28718e-14
DNASE2	protein_coding	ENSG00000105612	0.836859	4.7109	1.5335e-29	1.1601e-28
MAST1	protein_coding	ENSG00000105613	0.827714	2.59659	1.42908e-14	5.684e-14
LENG1	protein_coding	ENSG00000105617	-1.06975	3.12029	2.28605e-26	1.52532e-25
PRPF31	protein_coding	ENSG00000105618	-0.719722	6.80305	4.01746e-28	2.87916e-27
JAK3	protein_coding	ENSG00000105639	1.57758	2.29427	1.19563e-34	1.10426e-33
PDE4C	protein_coding	ENSG00000105650	4.18337	-3.04432	2.3394e-05	5.10502e-05
ISYNA1	protein_coding	ENSG00000105655	1.08716	0.541633	1.31497e-07	3.43141e-07
ELL	protein_coding	ENSG00000105656	-1.14871	4.30286	3.47296e-50	5.34183e-49
CRTC1	protein_coding	ENSG00000105662	1.34803	4.29483	3.5115e-42	4.22485e-41
DDX49	protein_coding	ENSG00000105671	-0.645284	4.84721	4.85477e-19	2.40314e-18
ARMC6	protein_coding	ENSG00000105676	-0.595598	5.03655	1.48571e-16	6.53392e-16
TMEM59L	protein_coding	ENSG00000105696	1.27507	2.67115	1.23412e-22	7.07767e-22
ZNF14	protein_coding	ENSG00000105708	-0.61901	0.0488155	0.00115642	0.00211004
SCN1B	protein_coding	ENSG00000105711	1.16284	2.8599	3.32044e-30	2.57251e-29
PBX4	protein_coding	ENSG00000105717	1.22159	0.0204534	8.32237e-09	2.35642e-08
ERF	protein_coding	ENSG00000105722	-1.20013	7.15064	6.30842e-71	1.77627e-69
ZNF574	protein_coding	ENSG00000105732	-0.807817	4.89174	5.21727e-28	3.7191e-27
GRIK5	protein_coding	ENSG00000105737	1.2256	0.0374904	1.30117e-05	2.90386e-05
SIPA1L3	protein_coding	ENSG00000105738	0.680199	5.16674	1.50233e-19	7.60383e-19
ZNF85	protein_coding	ENSG00000105750	1.28559	1.381	1.1012e-18	5.37043e-18
SMG9	protein_coding	ENSG00000105771	1.35718	6.03171	4.56903e-82	1.7277e-80
RUNDC3B	protein_coding	ENSG00000105784	2.91246	-3.31012	1.13869e-05	2.55496e-05
CFAP69	protein_coding	ENSG00000105792	-0.626023	0.943015	0.00018571	0.000371311
GTPBP10	protein_coding	ENSG00000105793	-0.810035	4.42496	1.07327e-25	6.97568e-25
DNAJC2	protein_coding	ENSG00000105821	-1.45614	6.74576	2.92985e-91	1.4611e-89
TFPI2	protein_coding	ENSG00000105825	-1.43809	-0.372338	0.000360481	0.000699726
NAMPT	protein_coding	ENSG00000105835	-1.44029	7.61118	3.16015e-80	1.13441e-78
TWISTNB	protein_coding	ENSG00000105849	-0.984039	5.88456	3.59227e-40	4.04143e-39
PIK3CG	protein_coding	ENSG00000105851	-1.96831	-1.07871	1.12943e-08	3.16664e-08
PON3	protein_coding	ENSG00000105852	1.12486	-1.0879	0.000443384	0.00085261
HBP1	protein_coding	ENSG00000105856	-1.59763	4.86067	1.085e-92	5.62029e-91
DUS4L	protein_coding	ENSG00000105865	-0.863096	3.37713	2.71072e-22	1.53487e-21
SP4	protein_coding	ENSG00000105866	-0.776219	4.36661	5.61383e-25	3.54351e-24
WDR91	protein_coding	ENSG00000105875	0.788951	2.84255	5.24766e-16	2.24273e-15
DNAH11	protein_coding	ENSG00000105877	1.23172	1.4006	1.24793e-15	5.23399e-15
CBLL1	protein_coding	ENSG00000105879	-0.783772	5.31248	6.57561e-26	4.31219e-25
STEAP1B	protein_coding	ENSG00000105889	1.17612	-1.71004	0.00737351	0.0121166
PTN	protein_coding	ENSG00000105894	0.723832	5.13272	1.40013e-22	8.0164e-22
MPP6	protein_coding	ENSG00000105926	-0.909062	5.92084	3.3825e-39	3.66176e-38
ADAP1	protein_coding	ENSG00000105963	0.814453	0.151811	5.72595e-05	0.00012013
TFEC	protein_coding	ENSG00000105967	3.49209	0.210747	1.52408e-49	2.3016e-48
CAV2	protein_coding	ENSG00000105971	-0.792123	4.93007	1.08853e-26	7.36708e-26
CAV1	protein_coding	ENSG00000105974	-1.65089	8.50338	4.92215e-138	6.37418e-136
MET	protein_coding	ENSG00000105976	-0.810776	7.39979	2.55378e-34	2.32915e-33
HOXA1	protein_coding	ENSG00000105991	0.698666	3.31609	3.88765e-14	1.50501e-13
DNAJB6	protein_coding	ENSG00000105993	-0.859417	7.01909	2.28616e-38	2.40782e-37
HOXA3	protein_coding	ENSG00000105997	1.12884	1.37853	3.83722e-16	1.64901e-15
HOXA6	protein_coding	ENSG00000106006	2.11035	-1.1788	3.1838e-12	1.10805e-11
ANKRD7	protein_coding	ENSG00000106013	1.14824	-1.04973	0.000116669	0.000238012
VIPR2	protein_coding	ENSG00000106018	1.70029	-3.03398	0.00837344	0.0136508
SSBP1	protein_coding	ENSG00000106028	-0.973659	6.06371	1.78619e-44	2.3206e-43
HOXA13	protein_coding	ENSG00000106031	1.87688	1.8264	2.43414e-53	4.08579e-52
TAX1BP1	protein_coding	ENSG00000106052	-0.983058	7.82673	2.39116e-41	2.79185e-40
CPVL	protein_coding	ENSG00000106066	1.32043	-2.31703	0.00362643	0.00622948
GRB10	protein_coding	ENSG00000106070	-0.608217	6.36137	6.59194e-20	3.37902e-19
FKBP14	protein_coding	ENSG00000106080	-0.759811	6.63254	8.50414e-32	7.00305e-31
STX1A	protein_coding	ENSG00000106089	-0.657897	4.50768	4.70639e-15	1.91589e-14
MINDY4	protein_coding	ENSG00000106125	1.32973	-2.31565	0.00299962	0.00520809
NSUN5P2	transcribed_unprocessed_pseudogene	ENSG00000106133	0.724148	3.69361	2.6227e-09	7.6984e-09
CCL24	protein_coding	ENSG00000106178	1.08196	1.00479	3.4282e-09	9.98973e-09
PDAP1	protein_coding	ENSG00000106244	-0.833177	7.71071	5.73772e-32	4.75256e-31
BUD31	protein_coding	ENSG00000106245	-0.728493	6.59703	1.93045e-25	1.24195e-24
EIF3B	protein_coding	ENSG00000106263	-1.32838	9.91707	3.68409e-83	1.44056e-81
FSCN3	protein_coding	ENSG00000106328	-3.05892	-3.57956	0.000260476	0.000513344
PCOLCE	protein_coding	ENSG00000106333	0.982687	6.11142	4.80065e-42	5.73863e-41
FBXO24	protein_coding	ENSG00000106336	0.95641	-1.57054	0.00554052	0.00927154
RBM28	protein_coding	ENSG00000106344	-0.799306	5.7926	2.06392e-32	1.7425e-31
IMPDH1	protein_coding	ENSG00000106348	-0.887611	5.99943	6.49779e-40	7.22253e-39
AGFG2	protein_coding	ENSG00000106351	0.867548	3.60118	7.55951e-24	4.55671e-23
LSM5	protein_coding	ENSG00000106355	-0.736134	5.91443	1.37611e-28	1.00443e-27
GLCCI1	protein_coding	ENSG00000106415	1.98919	2.15382	6.40199e-54	1.0952e-52
MYL10	protein_coding	ENSG00000106436	1.44372	0.545941	8.97422e-08	2.37124e-07
NRF1	protein_coding	ENSG00000106459	-1.08545	3.87545	1.86192e-40	2.11448e-39
TMEM106B	protein_coding	ENSG00000106460	0.650106	5.93707	3.23568e-21	1.75063e-20
SFRP4	protein_coding	ENSG00000106483	2.6085	0.59812	3.73866e-46	5.19038e-45
MEST	protein_coding	ENSG00000106484	6.77176	-3.20965	8.96391e-07	2.20028e-06
POU6F2	protein_coding	ENSG00000106536	2.24784	1.23043	2.63653e-45	3.53008e-44
RARRES2	protein_coding	ENSG00000106538	1.40979	-0.933961	8.6505e-07	2.12617e-06
AHR	protein_coding	ENSG00000106546	3.23667	-1.47301	4.15355e-19	2.05942e-18
CHCHD3	protein_coding	ENSG00000106554	-0.687384	5.52393	1.44489e-20	7.60057e-20
GIMAP2	protein_coding	ENSG00000106560	1.65096	-2.18722	1.51942e-05	3.37093e-05
TMEM176B	protein_coding	ENSG00000106565	0.879084	-0.28928	0.000198944	0.000396685
GLI3	protein_coding	ENSG00000106571	0.985479	5.52452	2.0561e-42	2.5038e-41
URGCP	protein_coding	ENSG00000106608	0.823581	4.35451	7.95223e-28	5.63203e-27
RHEB	protein_coding	ENSG00000106615	-0.865777	5.74918	1.08297e-33	9.62564e-33
YKT6	protein_coding	ENSG00000106636	-0.741783	7.69992	3.55933e-29	2.65429e-28
CLIP2	protein_coding	ENSG00000106665	-1.12502	6.37324	1.91097e-63	4.40896e-62
EIF4H	protein_coding	ENSG00000106682	-0.635901	8.57584	9.31193e-22	5.15387e-21
SPATA6L	protein_coding	ENSG00000106686	0.680038	0.776071	3.63883e-05	7.79653e-05
SLC1A1	protein_coding	ENSG00000106688	1.13903	0.353612	8.28291e-09	2.34553e-08
LHX2	protein_coding	ENSG00000106689	0.799955	-1.82693	0.0283602	0.0426518
FSD1L	protein_coding	ENSG00000106701	-1.05402	3.31199	1.91306e-31	1.55255e-30
CNTNAP3	protein_coding	ENSG00000106714	1.36192	3.36796	7.96421e-53	1.31303e-51
NMRK1	protein_coding	ENSG00000106733	1.32525	1.92165	1.83188e-26	1.22739e-25
PRUNE2	protein_coding	ENSG00000106772	1.53175	3.20684	6.45406e-47	9.13927e-46
CORO2A	protein_coding	ENSG00000106789	1.45235	4.99118	1.15446e-80	4.18156e-79
SEC61B	protein_coding	ENSG00000106803	-0.585309	6.05883	8.51293e-19	4.1677e-18
C5	protein_coding	ENSG00000106804	2.21925	0.159351	1.36326e-20	7.17903e-20
ECM2	protein_coding	ENSG00000106823	2.24159	0.561125	1.11368e-32	9.53954e-32
TLE4	protein_coding	ENSG00000106829	2.87153	-3.01472	3.97066e-05	8.48035e-05
DNM1	protein_coding	ENSG00000106976	0.893871	6.61518	2.39621e-39	2.60575e-38
CDC37L1	protein_coding	ENSG00000106993	-0.62324	3.87796	2.68817e-13	9.94164e-13
RIC1	protein_coding	ENSG00000107036	0.736044	5.73378	2.18705e-26	1.46048e-25
KDM4C	protein_coding	ENSG00000107077	-0.694776	3.57462	1.05177e-15	4.43291e-15
DOCK8	protein_coding	ENSG00000107099	2.92745	1.87571	1.30508e-86	5.7364e-85
ELAVL2	protein_coding	ENSG00000107105	0.736925	3.78226	3.04122e-17	1.38371e-16
KCNT1	protein_coding	ENSG00000107147	2.27921	-0.717057	3.57159e-13	1.31222e-12
CA9	protein_coding	ENSG00000107159	-3.62051	-1.35584	2.75602e-30	2.14419e-29
FUBP3	protein_coding	ENSG00000107164	-1.14147	7.29235	3.35177e-62	7.42042e-61
PIP5K1B	protein_coding	ENSG00000107242	2.33502	0.0961039	2.47704e-28	1.78797e-27
BAG1	protein_coding	ENSG00000107262	-0.857267	5.24791	7.52522e-32	6.21392e-31
NPDC1	protein_coding	ENSG00000107281	1.61612	4.64195	7.93064e-28	5.61839e-27
APBA1	protein_coding	ENSG00000107282	2.01471	2.14207	6.15108e-49	9.15705e-48
SETX	protein_coding	ENSG00000107290	-0.643552	7.07263	5.20343e-20	2.67867e-19
SH3GL2	protein_coding	ENSG00000107295	1.50926	1.74777	3.11022e-28	2.23429e-27
SHB	protein_coding	ENSG00000107338	-1.01653	3.78814	3.41402e-34	3.09265e-33
UBE2R2	protein_coding	ENSG00000107341	-0.649297	6.47686	6.34102e-24	3.83663e-23
ZFAND5	protein_coding	ENSG00000107372	-0.816751	6.78395	1.35223e-36	1.33598e-35
PDLIM1	protein_coding	ENSG00000107438	1.43945	4.58212	3.86728e-83	1.50974e-81
GATA3	protein_coding	ENSG00000107485	-1.11921	2.8758	1.57277e-29	1.18906e-28
ATRNL1	protein_coding	ENSG00000107518	1.07164	3.50289	1.14515e-33	1.01708e-32
PHYH	protein_coding	ENSG00000107537	0.623846	2.90564	1.86349e-10	5.87433e-10
RASSF4	protein_coding	ENSG00000107551	1.7978	2.92264	3.3584e-71	9.55062e-70
DNMBP	protein_coding	ENSG00000107554	-1.16249	7.29293	8.35521e-61	1.77471e-59
CXCL12	protein_coding	ENSG00000107562	3.16384	-0.641086	1.09293e-27	7.70427e-27
EIF3A	protein_coding	ENSG00000107581	-1.19067	9.63003	6.43594e-61	1.37553e-59
SEC23IP	protein_coding	ENSG00000107651	-0.690983	6.3295	2.64872e-24	1.63004e-23
PLEKHA1	protein_coding	ENSG00000107679	1.10263	4.74364	1.56072e-48	2.29365e-47
UNC5B	protein_coding	ENSG00000107731	-0.764481	3.84409	2.70483e-20	1.40533e-19
CDH23	protein_coding	ENSG00000107736	2.4222	1.58528	6.31288e-55	1.11154e-53
VSIR	protein_coding	ENSG00000107738	2.33589	-2.8491	5.55795e-05	0.000116748
SPOCK2	protein_coding	ENSG00000107742	1.32805	0.354208	1.15482e-08	3.23633e-08
BMPR1A	protein_coding	ENSG00000107779	0.588962	5.32147	1.6386e-17	7.56402e-17
ACTA2	protein_coding	ENSG00000107796	1.13392	2.00486	1.55861e-19	7.88535e-19
TLX1	protein_coding	ENSG00000107807	0.909571	0.267706	1.22567e-06	2.97725e-06
TWNK	protein_coding	ENSG00000107815	-1.75981	6.04243	1.85688e-144	2.67825e-142
LZTS2	protein_coding	ENSG00000107816	0.691435	6.03322	1.24435e-23	7.42081e-23
KAZALD1	protein_coding	ENSG00000107821	0.950436	2.75217	1.90149e-19	9.58584e-19
PITX3	protein_coding	ENSG00000107859	-2.71817	-3.63042	4.39913e-05	9.35399e-05
CPEB3	protein_coding	ENSG00000107864	-0.632552	1.49702	1.30059e-06	3.15228e-06
ANKRD26	protein_coding	ENSG00000107890	0.626931	4.63215	7.40101e-16	3.14572e-15
LARP4B	protein_coding	ENSG00000107929	-0.653214	4.68111	1.73132e-18	8.38069e-18
GTPBP4	protein_coding	ENSG00000107937	-1.22722	5.88156	5.91161e-65	1.41684e-63
BCCIP	protein_coding	ENSG00000107949	-1.37812	7.24443	2.63364e-70	7.28317e-69
MTPAP	protein_coding	ENSG00000107951	-1.28919	5.52838	1.05561e-79	3.73369e-78
NEURL1	protein_coding	ENSG00000107954	0.660198	0.107229	0.00440398	0.00747769
SH3PXD2A	protein_coding	ENSG00000107957	1.06125	6.74879	1.39214e-53	2.34986e-52
PITRM1	protein_coding	ENSG00000107959	-0.906254	5.56081	5.84558e-40	6.51562e-39
MAP3K8	protein_coding	ENSG00000107968	0.779701	2.63822	1.19009e-14	4.75465e-14
DKK1	protein_coding	ENSG00000107984	-2.35568	0.807581	2.71295e-10	8.46133e-10
EBF3	protein_coding	ENSG00000108001	-0.904314	3.14706	6.78281e-19	3.3356e-18
GLRX3	protein_coding	ENSG00000108010	-1.04043	5.93274	5.85839e-54	1.00363e-52
SORCS1	protein_coding	ENSG00000108018	0.639295	1.50515	1.56587e-05	3.46919e-05
SMC3	protein_coding	ENSG00000108055	-0.750413	7.76191	1.14057e-25	7.40513e-25
TFAM	protein_coding	ENSG00000108064	-1.0538	7.30863	6.94136e-54	1.18495e-52
CCDC6	protein_coding	ENSG00000108091	-0.590039	6.95384	3.36038e-19	1.67303e-18
UBE2S	protein_coding	ENSG00000108106	-0.912622	8.61385	3.7034e-42	4.45351e-41
ZMIZ1	protein_coding	ENSG00000108175	-1.33551	6.70518	2.46131e-83	9.70305e-82
DNAJC12	protein_coding	ENSG00000108176	1.00806	0.217776	1.82269e-06	4.36846e-06
PPIF	protein_coding	ENSG00000108179	-0.954731	7.5974	1.89001e-45	2.5447e-44
PBLD	protein_coding	ENSG00000108187	1.52342	2.24893	3.54054e-35	3.32739e-34
TBC1D12	protein_coding	ENSG00000108239	0.851847	4.05886	8.31659e-26	5.42877e-25
KRT23	protein_coding	ENSG00000108244	-1.91775	0.809854	9.25144e-08	2.44181e-07
NUFIP2	protein_coding	ENSG00000108256	-0.701696	8.03293	2.08941e-24	1.29145e-23
FBXL20	protein_coding	ENSG00000108306	-1.3536	3.49654	6.79867e-52	1.09538e-50
PSMD3	protein_coding	ENSG00000108344	-0.702779	8.04693	7.67809e-29	5.66786e-28
RGS9	protein_coding	ENSG00000108370	1.61914	2.87601	7.01604e-54	1.196e-52
RNF43	protein_coding	ENSG00000108375	1.05789	-0.864242	0.000199699	0.000398093
WNT3	protein_coding	ENSG00000108379	1.17455	3.29389	2.37682e-35	2.24688e-34
ASPA	protein_coding	ENSG00000108381	2.97521	-2.78059	3.92405e-07	9.88275e-07
2019-09-04	protein_coding	ENSG00000108387	2.15	-0.20494	1.57508e-19	7.96534e-19
MTMR4	protein_coding	ENSG00000108389	0.687661	6.55893	8.90243e-25	5.57838e-24
P2RX1	protein_coding	ENSG00000108405	2.52827	-1.32349	2.1823e-07	5.59797e-07
TRIM16L	protein_coding	ENSG00000108448	0.726496	4.77511	2.36373e-22	1.34123e-21
CDK5RAP3	protein_coding	ENSG00000108465	1.09123	2.47132	7.69732e-19	3.77377e-18
CBX1	protein_coding	ENSG00000108468	-0.779257	8.29461	3.59832e-30	2.78154e-29
RECQL5	protein_coding	ENSG00000108469	0.937183	5.01546	1.74063e-35	1.65652e-34
GALK1	protein_coding	ENSG00000108479	0.728008	4.34908	1.73465e-21	9.49819e-21
CAMTA2	protein_coding	ENSG00000108509	0.718909	4.78532	1.0214e-19	5.20249e-19
MED13	protein_coding	ENSG00000108510	-0.877381	7.73646	5.97943e-37	5.9663e-36
ENO3	protein_coding	ENSG00000108515	0.726171	4.47632	3.7542e-22	2.1123e-21
PFN1	protein_coding	ENSG00000108518	-0.793304	9.34568	1.65129e-34	1.51869e-33
NUP88	protein_coding	ENSG00000108559	-0.79446	5.92913	1.97922e-32	1.67334e-31
C1QBP	protein_coding	ENSG00000108561	-1.14493	7.17621	2.46996e-65	6.00949e-64
SLC6A4	protein_coding	ENSG00000108576	-2.30071	-1.46078	9.22719e-10	2.7862e-09
GOSR1	protein_coding	ENSG00000108587	-0.869653	6.21794	7.41623e-40	8.21309e-39
CCDC47	protein_coding	ENSG00000108588	-1.19161	7.93808	1.55716e-69	4.24291e-68
FTSJ3	protein_coding	ENSG00000108592	-0.96878	7.57492	1.62455e-45	2.19834e-44
ALDH3A1	protein_coding	ENSG00000108602	1.18377	-0.641541	1.18646e-05	2.65474e-05
UTP6	protein_coding	ENSG00000108651	-0.966171	6.4785	1.73611e-46	2.42562e-45
CYTH1	protein_coding	ENSG00000108669	0.667358	5.67691	8.73386e-24	5.25013e-23
LGALS3BP	protein_coding	ENSG00000108679	0.820616	8.07014	2.35379e-34	2.14838e-33
ASIC2	protein_coding	ENSG00000108684	1.48706	0.385378	7.29571e-15	2.94506e-14
CCL2	protein_coding	ENSG00000108691	-1.27777	5.02625	9.25204e-10	2.79336e-09
PEX12	protein_coding	ENSG00000108733	-0.693949	2.81733	1.12854e-12	4.03138e-12
KAT2A	protein_coding	ENSG00000108773	1.02792	6.08129	1.1568e-26	7.82249e-26
RAB5C	protein_coding	ENSG00000108774	-0.587987	4.60966	1.69467e-13	6.33845e-13
CNTNAP1	protein_coding	ENSG00000108797	1.06613	5.59713	1.04859e-56	1.94586e-55
EZH1	protein_coding	ENSG00000108799	0.904939	3.7867	5.12837e-27	3.51828e-26
PPP1R9B	protein_coding	ENSG00000108819	-0.797571	7.2999	9.91938e-36	9.54186e-35
SGCA	protein_coding	ENSG00000108823	2.86223	-2.5545	1.50429e-08	4.18453e-08
LRRC59	protein_coding	ENSG00000108829	-1.01474	8.05531	5.6818e-55	1.00189e-53
ALOX12	protein_coding	ENSG00000108839	3.3134	-4.11214	0.00314192	0.00544221
HDAC5	protein_coding	ENSG00000108840	0.786073	4.98034	1.90598e-27	1.32994e-26
ABCC3	protein_coding	ENSG00000108846	1.92472	5.26579	8.6303e-112	6.5993e-110
SMURF2	protein_coding	ENSG00000108854	-0.605971	7.58813	1.16059e-20	6.13321e-20
EFTUD2	protein_coding	ENSG00000108883	-0.597846	7.44435	1.66726e-20	8.75121e-20
SLC16A6	protein_coding	ENSG00000108932	-2.3445	0.802409	8.74263e-25	5.4811e-24
YWHAE	protein_coding	ENSG00000108953	-0.886151	8.49778	2.67039e-40	3.01697e-39
MMD	protein_coding	ENSG00000108960	0.600127	5.12307	2.6299e-17	1.20179e-16
TMEM97	protein_coding	ENSG00000109084	1.25953	6.60809	6.87453e-78	2.3159e-76
PMP22	protein_coding	ENSG00000109099	-0.846321	5.31588	1.18258e-31	9.67881e-31
UNC119	protein_coding	ENSG00000109103	0.964042	5.59005	2.90933e-47	4.14903e-46
ALDOC	protein_coding	ENSG00000109107	0.951137	3.17045	2.89021e-24	1.77548e-23
TMEM33	protein_coding	ENSG00000109133	-0.783725	7.28529	3.60834e-35	3.38978e-34
KIAA1211	protein_coding	ENSG00000109265	2.87656	3.46358	2.03008e-173	4.79398e-171
NFKB1	protein_coding	ENSG00000109320	-1.31377	6.43126	1.18774e-62	2.67125e-61
AREG	protein_coding	ENSG00000109321	-2.34484	5.79866	1.95388e-43	2.45376e-42
MANBA	protein_coding	ENSG00000109323	0.899482	4.05013	4.91179e-28	3.50653e-27
UBE2D3	protein_coding	ENSG00000109332	-1.09743	8.26013	7.30297e-65	1.74511e-63
MAPK10	protein_coding	ENSG00000109339	1.96561	-1.83155	3.29359e-06	7.7232e-06
NDUFC1	protein_coding	ENSG00000109390	-0.599196	5.05137	1.75708e-13	6.56575e-13
INPP4B	protein_coding	ENSG00000109452	0.777546	5.4914	4.14411e-30	3.19421e-29
GAB1	protein_coding	ENSG00000109458	1.07943	3.08082	1.21824e-27	8.5725e-27
CPE	protein_coding	ENSG00000109472	0.879276	5.35854	4.55458e-36	4.43079e-35
WFS1	protein_coding	ENSG00000109501	1.70973	5.79564	1.10402e-128	1.18716e-126
GRPEL1	protein_coding	ENSG00000109519	-1.012	5.48726	9.45381e-42	1.12119e-40
GAR1	protein_coding	ENSG00000109534	-1.66875	6.0117	2.67826e-114	2.19426e-112
DHX15	protein_coding	ENSG00000109606	-1.41197	7.57977	6.78717e-106	4.54118e-104
SOD3	protein_coding	ENSG00000109610	2.27542	-2.08019	4.30124e-06	9.99653e-06
TRIM2	protein_coding	ENSG00000109654	1.07272	2.95462	1.57137e-24	9.76009e-24
FBXW7	protein_coding	ENSG00000109670	-1.12711	5.44435	1.08516e-64	2.58539e-63
NEIL3	protein_coding	ENSG00000109674	2.43836	3.51629	6.00968e-127	6.26646e-125
TBC1D19	protein_coding	ENSG00000109680	1.3775	1.20222	4.70453e-18	2.23155e-17
GLRB	protein_coding	ENSG00000109738	1.44301	3.65663	1.29193e-66	3.24491e-65
BST1	protein_coding	ENSG00000109743	-1.41455	-0.894277	3.60543e-07	9.10504e-07
HGFAC	protein_coding	ENSG00000109758	4.46911	0.365934	2.60816e-57	4.95057e-56
SNX25	protein_coding	ENSG00000109762	1.06	3.55509	4.02131e-32	3.35392e-31
UFSP2	protein_coding	ENSG00000109775	-0.687517	4.30212	2.10732e-18	1.0166e-17
KLHL5	protein_coding	ENSG00000109790	0.618028	6.7226	6.4449e-20	3.30576e-19
FAM149A	protein_coding	ENSG00000109794	1.02382	0.960925	2.20958e-10	6.93992e-10
NCAPG	protein_coding	ENSG00000109805	1.21917	6.23443	2.0586e-67	5.28631e-66
UGDH	protein_coding	ENSG00000109814	-0.732175	5.98536	5.74977e-27	3.93227e-26
CRYAB	protein_coding	ENSG00000109846	0.594607	6.08368	9.65277e-17	4.28978e-16
DBX1	protein_coding	ENSG00000109851	-3.7985	-3.55277	2.74373e-06	6.47733e-06
ZPR1	protein_coding	ENSG00000109917	-0.742092	5.95991	2.03456e-27	1.41842e-26
VWA5A	protein_coding	ENSG00000110002	1.23842	2.71723	2.1343e-32	1.80066e-31
DNAJC4	protein_coding	ENSG00000110011	0.869138	2.86061	2.22721e-16	9.70457e-16
EHD1	protein_coding	ENSG00000110047	-1.35292	7.0741	2.58037e-86	1.12597e-84
PUS3	protein_coding	ENSG00000110060	-0.915077	3.0686	1.26375e-22	7.24242e-22
KMT5B	protein_coding	ENSG00000110066	-0.740518	5.91291	3.00759e-25	1.91904e-24
NRXN2	protein_coding	ENSG00000110076	1.40924	5.32048	6.55637e-86	2.81503e-84
MS4A4A	protein_coding	ENSG00000110079	2.38954	-3.84624	0.00548695	0.00918636
ST3GAL4	protein_coding	ENSG00000110080	0.626253	4.12949	8.39037e-15	3.3745e-14
CCND1	protein_coding	ENSG00000110092	-0.881543	8.25482	2.76966e-42	3.34232e-41
CCDC86	protein_coding	ENSG00000110104	-1.67929	6.58753	2.46695e-133	2.91282e-131
PRPF19	protein_coding	ENSG00000110107	-0.893673	7.41381	1.54384e-41	1.82019e-40
CCKBR	protein_coding	ENSG00000110148	2.2735	-0.699516	3.56169e-16	1.53279e-15
TRIM3	protein_coding	ENSG00000110171	0.871877	4.36882	9.17543e-30	6.98731e-29
CHORDC1	protein_coding	ENSG00000110172	-0.769925	7.57965	7.20844e-29	5.32607e-28
FOLR1	protein_coding	ENSG00000110195	2.24054	4.55845	2.01088e-174	4.79565e-172
ANAPC15	protein_coding	ENSG00000110200	-0.75063	4.60868	1.6191e-23	9.61046e-23
FOLR3	protein_coding	ENSG00000110203	2.07427	-2.41663	0.000166724	0.000334908
PANX1	protein_coding	ENSG00000110218	-1.2136	6.10914	5.01775e-72	1.46146e-70
ARHGEF17	protein_coding	ENSG00000110237	2.44939	6.28615	2.68946e-235	1.50654e-232
CEP126	protein_coding	ENSG00000110318	1.13311	2.87652	7.14611e-29	5.28325e-28
EIF4G2	protein_coding	ENSG00000110321	-1.2937	10.2542	2.57466e-75	8.11725e-74
BIRC2	protein_coding	ENSG00000110330	-0.846121	6.22865	8.79044e-33	7.55119e-32
DDX6	protein_coding	ENSG00000110367	-0.692626	6.9304	1.70801e-24	1.05951e-23
SLC15A3	protein_coding	ENSG00000110446	2.90344	0.648495	1.46847e-44	1.91921e-43
ACCS	protein_coding	ENSG00000110455	1.76995	2.3692	3.31088e-53	5.53046e-52
MDK	protein_coding	ENSG00000110492	0.922784	7.16502	1.04111e-44	1.36587e-43
AMBRA1	protein_coding	ENSG00000110497	-0.795547	5.35961	5.04016e-31	4.01728e-30
NAA40	protein_coding	ENSG00000110583	1.16701	5.64464	1.45421e-65	3.55249e-64
SLC22A18	protein_coding	ENSG00000110628	2.07192	2.70731	6.01741e-55	1.06029e-53
SLC35F2	protein_coding	ENSG00000110660	-0.774907	6.99481	6.58152e-34	5.89546e-33
ELMOD1	protein_coding	ENSG00000110675	0.651936	1.70212	1.77431e-07	4.57774e-07
SOX6	protein_coding	ENSG00000110693	2.28244	1.81884	7.91032e-57	1.47359e-55
C11orf58	protein_coding	ENSG00000110696	-0.708322	7.38222	1.31189e-26	8.84397e-26
NUP98	protein_coding	ENSG00000110713	-0.597153	7.77797	1.73563e-19	8.76808e-19
TCIRG1	protein_coding	ENSG00000110719	1.95228	5.35517	1.41762e-97	7.95951e-96
CHKA	protein_coding	ENSG00000110721	-0.673435	4.62592	1.08871e-18	5.31168e-18
EXPH5	protein_coding	ENSG00000110723	1.44023	4.40105	3.8521e-61	8.29182e-60
POU2AF1	protein_coding	ENSG00000110777	1.75445	-1.09743	6.54301e-05	0.00013657
PTPN5	protein_coding	ENSG00000110786	3.49924	-1.07918	2.9671e-18	1.42282e-17
VWF	protein_coding	ENSG00000110799	2.87924	1.07888	4.58188e-48	6.66448e-47
PPFIBP1	protein_coding	ENSG00000110841	-1.03613	6.90764	2.13716e-58	4.19543e-57
CD69	protein_coding	ENSG00000110848	-6.87611	-3.96735	2.19097e-07	5.61904e-07
CLEC2B	protein_coding	ENSG00000110852	-1.3785	3.90747	2.72901e-56	4.9836e-55
SELPLG	protein_coding	ENSG00000110876	1.02376	0.552085	1.10056e-07	2.88739e-07
CORO1C	protein_coding	ENSG00000110880	-0.923014	8.10778	4.34333e-43	5.39823e-42
ASIC1	protein_coding	ENSG00000110881	0.996801	4.46179	1.02525e-37	1.0522e-36
TSPAN11	protein_coding	ENSG00000110900	0.93963	1.62436	2.49305e-11	8.26794e-11
MVK	protein_coding	ENSG00000110921	1.37172	4.8013	5.49131e-72	1.59745e-70
IL23A	protein_coding	ENSG00000110944	-1.38781	-0.356254	1.04616e-06	2.55644e-06
PTGES3	protein_coding	ENSG00000110958	-0.943956	8.31282	1.86564e-45	2.51329e-44
SYT10	protein_coding	ENSG00000110975	0.714061	-0.829911	0.00429661	0.00730621
RSRC2	protein_coding	ENSG00000111011	-0.6881	6.80106	7.79512e-24	4.6952e-23
LIN7A	protein_coding	ENSG00000111052	0.627831	2.3924	1.72256e-08	4.76965e-08
KRT18	protein_coding	ENSG00000111057	-0.885973	8.64979	2.41512e-40	2.73498e-39
ACSS3	protein_coding	ENSG00000111058	1.21656	3.28068	4.25078e-38	4.4324e-37
TNS2	protein_coding	ENSG00000111077	1.22951	4.84194	1.47223e-61	3.19187e-60
PPM1H	protein_coding	ENSG00000111110	2.31559	1.74076	2.8523e-58	5.58111e-57
METAP2	protein_coding	ENSG00000111142	-1.18546	7.08086	1.25147e-58	2.47895e-57
ELK3	protein_coding	ENSG00000111145	-1.04837	7.32714	3.93242e-59	7.88022e-58
SLC6A12	protein_coding	ENSG00000111181	3.18766	0.128291	2.28955e-37	2.32008e-36
WNT5B	protein_coding	ENSG00000111186	1.3685	2.45717	1.08101e-30	8.51422e-30
MAGOHB	protein_coding	ENSG00000111196	-0.818513	5.47863	7.57363e-27	5.16056e-26
TRPV4	protein_coding	ENSG00000111199	1.79017	3.68997	1.19282e-92	6.16557e-91
ITFG2	protein_coding	ENSG00000111203	-0.72598	4.04198	7.95602e-19	3.89902e-18
PRR4	protein_coding	ENSG00000111215	1.75647	-1.86145	3.61318e-05	7.74294e-05
PARP11	protein_coding	ENSG00000111224	-0.619897	3.58394	7.89217e-12	2.68805e-11
ARPC3	protein_coding	ENSG00000111229	-0.592012	5.58794	7.99886e-16	3.38907e-15
MYL2	protein_coding	ENSG00000111245	0.702163	3.36761	7.4126e-11	2.395e-10
RAD51AP1	protein_coding	ENSG00000111247	1.12818	5.26489	4.67437e-56	8.4719e-55
CUX2	protein_coding	ENSG00000111249	1.07983	0.318387	1.91588e-06	4.5818e-06
SH2B3	protein_coding	ENSG00000111252	-1.34935	7.10087	3.02688e-88	1.39138e-86
MANSC1	protein_coding	ENSG00000111261	0.891625	2.89087	1.1208e-20	5.92816e-20
KCNA1	protein_coding	ENSG00000111262	-1.80707	3.72041	8.81374e-89	4.10632e-87
DUSP16	protein_coding	ENSG00000111266	0.756781	5.42446	5.91331e-25	3.72766e-24
CREBL2	protein_coding	ENSG00000111269	0.885621	4.99463	3.10638e-35	2.92507e-34
ALDH2	protein_coding	ENSG00000111275	0.699488	4.7421	6.18705e-21	3.30072e-20
CDKN1B	protein_coding	ENSG00000111276	0.959783	4.94213	7.67316e-39	8.22168e-38
NAA25	protein_coding	ENSG00000111300	-0.978263	5.96447	1.64058e-47	2.35219e-46
GSG1	protein_coding	ENSG00000111305	1.20558	3.85045	2.31969e-46	3.23347e-45
SCNN1A	protein_coding	ENSG00000111319	0.803171	-0.320419	0.00114974	0.00209896
OAS3	protein_coding	ENSG00000111331	1.94861	4.70424	2.56778e-121	2.37885e-119
OAS2	protein_coding	ENSG00000111335	2.62431	-2.66324	9.84766e-06	2.21973e-05
RASAL1	protein_coding	ENSG00000111344	2.37673	1.95149	3.32273e-63	7.60784e-62
EIF2B1	protein_coding	ENSG00000111361	-0.641205	6.2951	2.85461e-22	1.61558e-21
SLC38A1	protein_coding	ENSG00000111371	-0.978799	6.99898	1.15506e-47	1.66698e-46
C12orf49	protein_coding	ENSG00000111412	-1.06136	6.80844	1.14429e-59	2.33778e-58
FZD10	protein_coding	ENSG00000111432	-1.98146	-2.81759	0.0024902	0.00436736
ADGRD1	protein_coding	ENSG00000111452	1.61021	3.45236	2.02044e-55	3.60491e-54
TBC1D30	protein_coding	ENSG00000111490	-0.641556	2.23906	7.55862e-08	2.00799e-07
RAB5B	protein_coding	ENSG00000111540	0.8643	6.34776	2.6878e-39	2.91626e-38
MDM1	protein_coding	ENSG00000111554	1.04919	3.28956	5.71436e-28	4.06502e-27
CNOT2	protein_coding	ENSG00000111596	-0.611549	5.43343	1.35914e-16	5.9893e-16
CPSF6	protein_coding	ENSG00000111605	-0.782087	7.05884	2.79011e-33	2.44117e-32
KRR1	protein_coding	ENSG00000111615	-1.00908	5.71596	4.33098e-43	5.38567e-42
MRPL51	protein_coding	ENSG00000111639	-0.739894	7.19693	4.29996e-24	2.6241e-23
GAPDH	protein_coding	ENSG00000111640	-0.640076	12.072	1.41458e-22	8.09334e-22
NOP2	protein_coding	ENSG00000111641	-1.33847	1.50585	1.63407e-16	7.16413e-16
CHD4	protein_coding	ENSG00000111642	-0.694481	4.43162	2.45053e-18	1.17887e-17
ACRBP	protein_coding	ENSG00000111644	0.628219	0.472778	0.00215104	0.00380133
UHRF1BP1L	protein_coding	ENSG00000111647	-0.636254	4.93855	1.533e-16	6.73208e-16
ING4	protein_coding	ENSG00000111653	0.796365	3.68785	8.22816e-22	4.56453e-21
CDCA3	protein_coding	ENSG00000111665	2.39751	6.20605	5.45024e-223	2.47698e-220
TPI1	protein_coding	ENSG00000111669	-0.618982	9.38261	2.62484e-21	1.42462e-20
GNPTAB	protein_coding	ENSG00000111670	0.631333	5.53712	1.55794e-20	8.18809e-20
SPSB2	protein_coding	ENSG00000111671	0.643449	3.24573	1.76394e-11	5.89867e-11
ENO2	protein_coding	ENSG00000111674	0.966063	5.87965	1.67063e-48	2.4507e-47
PTPN6	protein_coding	ENSG00000111679	-1.428	-1.70684	0.00126687	0.00230025
LPCAT3	protein_coding	ENSG00000111684	0.871548	5.82539	6.01501e-36	5.83267e-35
NT5DC3	protein_coding	ENSG00000111696	-0.69713	4.64644	1.46593e-22	8.37917e-22
SRSF9	protein_coding	ENSG00000111786	-0.780278	7.36367	2.99211e-31	2.40317e-30
AC009533.1	unprocessed_pseudogene	ENSG00000111788	0.608003	3.6834	1.09702e-10	3.5031e-10
BTN3A3	protein_coding	ENSG00000111801	2.26101	0.75444	3.62933e-36	3.54213e-35
TDP2	protein_coding	ENSG00000111802	-0.597267	5.07636	8.42073e-17	3.75472e-16
FRK	protein_coding	ENSG00000111816	1.6122	-0.499337	1.49689e-10	4.7454e-10
RWDD1	protein_coding	ENSG00000111832	-0.784164	5.54664	2.93038e-24	1.79923e-23
RSPH4A	protein_coding	ENSG00000111834	-1.06563	-1.21536	0.000845421	0.00157188
MAK	protein_coding	ENSG00000111837	-1.24709	-0.326121	2.61524e-09	7.67742e-09
PAK1IP1	protein_coding	ENSG00000111845	-1.53936	5.05589	1.16851e-94	6.2966e-93
GCNT2	protein_coding	ENSG00000111846	1.24795	1.33187	5.7204e-16	2.44174e-15
NEDD9	protein_coding	ENSG00000111859	0.792424	5.48476	3.69794e-29	2.75561e-28
CEP85L	protein_coding	ENSG00000111860	-0.767736	4.20827	6.02223e-24	3.64924e-23
ADTRP	protein_coding	ENSG00000111863	1.0681	2.23844	3.94586e-16	1.69509e-15
MCM9	protein_coding	ENSG00000111877	-0.825856	3.66884	1.54467e-23	9.18001e-23
FAM184A	protein_coding	ENSG00000111879	1.04692	-0.431175	6.78018e-06	1.55035e-05
RNGTT	protein_coding	ENSG00000111880	-0.694567	4.98201	5.20919e-22	2.91122e-21
GABRR2	protein_coding	ENSG00000111886	2.2009	-1.9312	2.08922e-07	5.36721e-07
TPD52L1	protein_coding	ENSG00000111907	1.03323	2.60282	4.51075e-20	2.32606e-19
NCOA7	protein_coding	ENSG00000111912	0.848145	4.85578	3.32847e-31	2.66532e-30
RIPOR2	protein_coding	ENSG00000111913	1.90782	3.23216	9.23811e-71	2.59043e-69
UST	protein_coding	ENSG00000111962	1.80401	2.76935	1.64678e-52	2.70021e-51
FBXO5	protein_coding	ENSG00000112029	0.641811	5.6289	1.44166e-20	7.58523e-20
MTRF1L	protein_coding	ENSG00000112031	-0.97024	5.75561	4.1058e-44	5.27167e-43
SRSF3	protein_coding	ENSG00000112081	-0.783787	8.22676	1.02557e-33	9.1222e-33
SOD2	protein_coding	ENSG00000112096	-0.675228	5.55786	2.08801e-21	1.13787e-20
ICK	protein_coding	ENSG00000112144	-1.44893	5.20579	4.89787e-94	2.61585e-92
CD83	protein_coding	ENSG00000112149	-1.20656	4.05382	6.56515e-47	9.29111e-46
MDN1	protein_coding	ENSG00000112159	-0.620572	6.95781	1.55331e-12	5.50134e-12
BMP5	protein_coding	ENSG00000112175	-1.30615	5.56378	5.94289e-82	2.24367e-80
BACH2	protein_coding	ENSG00000112182	0.782024	2.76433	1.60886e-14	6.37901e-14
RBM24	protein_coding	ENSG00000112183	-0.608484	4.44591	5.72365e-14	2.19322e-13
FBXL4	protein_coding	ENSG00000112234	0.688759	2.95452	1.26181e-12	4.49205e-12
CCNC	protein_coding	ENSG00000112237	-0.796224	5.88623	1.41371e-31	1.15353e-30
E2F3	protein_coding	ENSG00000112242	-0.733102	5.35617	2.26747e-27	1.57624e-26
PTP4A1	protein_coding	ENSG00000112245	-1.09771	-1.69112	0.00115617	0.00210974
GPLD1	protein_coding	ENSG00000112293	1.03729	0.954655	2.71664e-10	8.47064e-10
ALDH5A1	protein_coding	ENSG00000112294	1.37627	3.72314	7.78489e-59	1.55356e-57
CRYBG1	protein_coding	ENSG00000112297	-1.34733	1.79486	3.64665e-26	2.41443e-25
VNN1	protein_coding	ENSG00000112299	-3.19462	-0.364256	2.27885e-31	1.84135e-30
VNN2	protein_coding	ENSG00000112303	3.3138	-2.40683	3.8788e-08	1.04857e-07
C6orf62	protein_coding	ENSG00000112308	-0.708486	6.92672	2.1413e-27	1.49068e-26
HBS1L	protein_coding	ENSG00000112339	-1.13419	6.46639	2.27014e-59	4.59117e-58
PEX7	protein_coding	ENSG00000112357	-0.881907	0.717933	3.58971e-07	9.06915e-07
ZBTB24	protein_coding	ENSG00000112365	-1.23282	4.43201	1.30703e-58	2.58476e-57
SLC16A10	protein_coding	ENSG00000112394	1.27173	0.188537	3.0158e-10	9.37794e-10
ADGRG6	protein_coding	ENSG00000112414	1.09399	5.14132	1.34413e-47	1.93521e-46
QKI	protein_coding	ENSG00000112531	-0.726284	7.67719	1.21193e-28	8.86747e-28
C6orf118	protein_coding	ENSG00000112539	1.28171	0.0527558	1.8748e-09	5.55454e-09
TFEB	protein_coding	ENSG00000112561	1.12366	2.7208	9.46465e-23	5.44743e-22
SMOC2	protein_coding	ENSG00000112562	3.05024	1.56879	6.4607e-62	1.41343e-60
BYSL	protein_coding	ENSG00000112578	-0.9719	6.09694	1.97003e-39	2.14909e-38
FAM120B	protein_coding	ENSG00000112584	1.71149	5.17215	6.44332e-112	4.94268e-110
GUCA1B	protein_coding	ENSG00000112599	-1.42446	0.651438	7.88275e-16	3.34164e-15
PTK7	protein_coding	ENSG00000112655	1.13121	6.83292	9.58718e-64	2.22687e-62
CUL9	protein_coding	ENSG00000112659	0.813231	5.46541	7.9811e-30	6.10094e-29
DNPH1	protein_coding	ENSG00000112667	0.594688	3.69013	3.34607e-11	1.1015e-10
DUSP22	protein_coding	ENSG00000112679	1.40096	3.73359	1.4398e-61	3.12437e-60
PRPF4B	protein_coding	ENSG00000112739	-0.60483	6.75261	4.34123e-18	2.06288e-17
TTK	protein_coding	ENSG00000112742	1.26411	5.56824	3.84244e-64	9.01197e-63
SLC29A1	protein_coding	ENSG00000112759	1.8156	6.63967	1.28428e-159	2.51499e-157
TENT5A	protein_coding	ENSG00000112773	-1.04449	4.24512	1.76504e-45	2.38044e-44
CLIC5	protein_coding	ENSG00000112782	3.4384	-1.29462	2.63994e-17	1.20615e-16
FBRSL1	protein_coding	ENSG00000112787	-0.768532	5.75304	7.1813e-20	3.67331e-19
PRSS16	protein_coding	ENSG00000112812	1.80371	1.11437	9.37862e-30	7.13753e-29
SEMA5A	protein_coding	ENSG00000112902	0.814021	0.421605	1.35729e-05	3.02266e-05
GHR	protein_coding	ENSG00000112964	1.59698	2.74444	1.91379e-52	3.13376e-51
BRD8	protein_coding	ENSG00000112983	0.848111	6.82163	2.93985e-36	2.87737e-35
KIF20A	protein_coding	ENSG00000112984	-2.0893	7.52609	7.38395e-196	2.37143e-193
NNT	protein_coding	ENSG00000112992	0.748372	6.87338	9.63378e-29	7.0725e-28
MRPS30	protein_coding	ENSG00000112996	-1.0477	5.95872	1.03652e-55	1.86457e-54
HSPA9	protein_coding	ENSG00000113013	-1.11909	9.00258	1.23629e-56	2.28362e-55
SLC4A9	protein_coding	ENSG00000113073	2.81451	-2.12648	1.82884e-07	4.71388e-07
APBB3	protein_coding	ENSG00000113108	0.812977	2.91682	4.29827e-14	1.65864e-13
IK	protein_coding	ENSG00000113141	-1.27098	7.17085	2.34278e-63	5.38459e-62
COL4A3BP	protein_coding	ENSG00000113163	-1.33204	5.08939	1.26852e-80	4.58781e-79
PCDHB15	protein_coding	ENSG00000113248	1.41921	-0.0464829	9.88072e-11	3.16359e-10
ITK	protein_coding	ENSG00000113263	0.824042	1.19219	6.63492e-06	1.51829e-05
THG1L	protein_coding	ENSG00000113272	-0.691553	4.41363	1.24397e-18	6.04956e-18
CLINT1	protein_coding	ENSG00000113282	-1.09846	7.23301	2.492e-62	5.53224e-61
TTC1	protein_coding	ENSG00000113312	-0.634046	5.90272	7.52712e-21	4.00587e-20
RASGRF2	protein_coding	ENSG00000113319	2.25766	-1.36889	2.04856e-07	5.2667e-07
POLR3G	protein_coding	ENSG00000113356	-0.599675	5.06164	1.75692e-14	6.95349e-14
CDH6	protein_coding	ENSG00000113361	2.11184	0.93033	7.16673e-29	5.29687e-28
LMNB1	protein_coding	ENSG00000113368	-1.00504	8.35272	3.23913e-49	4.86112e-48
ARRDC3	protein_coding	ENSG00000113369	-1.51426	4.56489	7.64621e-55	1.34238e-53
SUB1	protein_coding	ENSG00000113387	-0.77331	7.83047	8.67926e-25	5.4442e-24
NPR3	protein_coding	ENSG00000113389	-2.38107	-0.530191	2.8976e-15	1.19368e-14
TARS	protein_coding	ENSG00000113407	-0.899383	9.13019	9.26903e-40	1.02367e-38
IRX4	protein_coding	ENSG00000113430	0.60257	1.68475	1.78308e-06	4.27609e-06
LNPEP	protein_coding	ENSG00000113441	1.0784	5.53854	5.43133e-52	8.77428e-51
PDE4D	protein_coding	ENSG00000113448	-0.757862	1.36971	1.21568e-05	2.71793e-05
BRIX1	protein_coding	ENSG00000113460	-0.871758	6.38388	2.91525e-38	3.05435e-37
SLC12A7	protein_coding	ENSG00000113504	1.23258	6.26749	1.52867e-33	1.35073e-32
IL4	protein_coding	ENSG00000113520	1.59653	-3.16968	0.0240196	0.0365506
SKP1	protein_coding	ENSG00000113558	-0.705064	5.65808	5.23287e-21	2.80722e-20
PPP2CA	protein_coding	ENSG00000113575	-1.11018	6.43624	1.27462e-59	2.59964e-58
NR3C1	protein_coding	ENSG00000113580	-2.46525	7.13845	3.50579e-275	3.5185e-272
SEC24A	protein_coding	ENSG00000113615	-0.972286	5.28983	6.67841e-43	8.26634e-42
RARS	protein_coding	ENSG00000113643	-0.956076	6.87587	6.65174e-47	9.40813e-46
WWC1	protein_coding	ENSG00000113645	-0.85218	6.70556	1.38517e-35	1.32346e-34
TCERG1	protein_coding	ENSG00000113649	-1.06651	7.61129	1.08301e-56	2.0082e-55
CSNK1A1	protein_coding	ENSG00000113712	-0.819161	7.0204	2.59876e-36	2.55079e-35
HMGXB3	protein_coding	ENSG00000113716	-0.797906	6.8807	1.53367e-35	1.46245e-34
CPEB4	protein_coding	ENSG00000113742	-1.52285	5.45364	4.63325e-90	2.22313e-88
HRH2	protein_coding	ENSG00000113749	1.4946	0.320602	2.35979e-13	8.75812e-13
EHHADH	protein_coding	ENSG00000113790	0.93554	2.79423	2.65182e-20	1.37809e-19
CNTN3	protein_coding	ENSG00000113805	1.92456	0.882327	4.09492e-16	1.75756e-15
CRBN	protein_coding	ENSG00000113851	-0.712184	3.98344	6.23867e-20	3.20066e-19
BCL6	protein_coding	ENSG00000113916	-0.955159	4.05335	8.10189e-33	6.96965e-32
HGD	protein_coding	ENSG00000113924	-2.23656	-2.77616	0.000591698	0.00112152
CLDN16	protein_coding	ENSG00000113946	1.55277	-2.30963	0.00713086	0.0117411
KPNA1	protein_coding	ENSG00000114030	-0.874569	6.78927	9.33102e-40	1.03005e-38
UBE3A	protein_coding	ENSG00000114062	-0.730202	7.44456	1.19166e-28	8.72448e-28
ARMC8	protein_coding	ENSG00000114098	-0.713986	4.92448	4.96845e-24	3.02439e-23
CEP70	protein_coding	ENSG00000114107	-0.952403	4.95653	8.7206e-29	6.41776e-28
RNF7	protein_coding	ENSG00000114125	-0.799393	4.2848	6.19575e-23	3.58915e-22
KAT2B	protein_coding	ENSG00000114166	0.943842	4.16218	2.27388e-32	1.91574e-31
BCHE	protein_coding	ENSG00000114200	0.941757	-0.0727927	6.92062e-06	1.58052e-05
PDCD10	protein_coding	ENSG00000114209	-1.10621	5.5075	3.42868e-53	5.71839e-52
WNT5A	protein_coding	ENSG00000114251	1.02428	5.03075	6.37014e-47	9.02573e-46
COL7A1	protein_coding	ENSG00000114270	1.13878	5.61529	9.3525e-06	2.11247e-05
FGF12	protein_coding	ENSG00000114279	1.38016	2.64467	2.6638e-38	2.79333e-37
PRKAR2A	protein_coding	ENSG00000114302	-0.627447	6.49258	3.86776e-21	2.08651e-20
TFG	protein_coding	ENSG00000114354	-0.729921	7.3633	2.16413e-27	1.50614e-26
RPL24	protein_coding	ENSG00000114391	-0.691194	8.96014	2.64045e-22	1.49543e-21
FXR1	protein_coding	ENSG00000114416	-0.663875	7.92018	6.12292e-23	3.54782e-22
CBLB	protein_coding	ENSG00000114423	-0.888402	3.58358	3.67739e-25	2.33713e-24
IFT57	protein_coding	ENSG00000114446	-0.678745	5.57691	5.12434e-23	2.9814e-22
IQCG	protein_coding	ENSG00000114473	-0.705012	3.41796	3.58397e-12	1.24534e-11
NCBP2	protein_coding	ENSG00000114503	-0.71822	7.08711	2.19853e-27	1.5292e-26
ROPN1B	protein_coding	ENSG00000114547	1.86905	-0.690704	2.22717e-11	7.40965e-11
ABTB1	protein_coding	ENSG00000114626	0.846055	2.94693	4.15459e-16	1.78222e-15
CSPG5	protein_coding	ENSG00000114646	2.54966	3.78245	1.83845e-164	3.75278e-162
EFCC1	protein_coding	ENSG00000114654	1.58481	-0.900347	2.42088e-06	5.74162e-06
KIAA1257	protein_coding	ENSG00000114656	1.88077	-1.36086	3.92934e-06	9.16047e-06
MRPL3	protein_coding	ENSG00000114686	-1.16854	7.28081	3.91871e-68	1.03384e-66
PLSCR4	protein_coding	ENSG00000114698	3.31966	1.71399	1.00073e-110	7.46271e-109
MAPKAPK3	protein_coding	ENSG00000114738	-0.670701	6.75497	1.11348e-23	6.65025e-23
ACVR2B	protein_coding	ENSG00000114739	-0.829226	4.11729	3.35101e-22	1.89074e-21
RRP9	protein_coding	ENSG00000114767	-1.52597	6.04266	1.07436e-96	5.9627e-95
ABCC5	protein_coding	ENSG00000114770	0.858511	5.87442	2.4292e-35	2.2946e-34
AADAC	protein_coding	ENSG00000114771	-0.875531	0.612242	0.000554042	0.00105346
ABHD14B	protein_coding	ENSG00000114779	0.754885	5.78462	1.56232e-26	1.04999e-25
KLHL24	protein_coding	ENSG00000114796	-1.13926	3.07575	3.59962e-26	2.38394e-25
VIPR1	protein_coding	ENSG00000114812	2.87474	0.318245	2.97073e-30	2.30677e-29
SSR3	protein_coding	ENSG00000114850	-0.876149	8.35459	2.24613e-41	2.62507e-40
TNNC1	protein_coding	ENSG00000114854	1.66345	5.50107	1.27393e-101	7.69051e-100
EIF4G1	protein_coding	ENSG00000114867	-1.35143	10.0285	2.9066e-89	1.36474e-87
ADAM23	protein_coding	ENSG00000114948	1.01453	4.79549	1.6992e-42	2.0797e-41
IL1A	protein_coding	ENSG00000115008	-1.16576	0.404565	2.13021e-08	5.85735e-08
CCL20	protein_coding	ENSG00000115009	-3.47905	4.56413	5.09516e-33	4.40672e-32
PIKFYVE	protein_coding	ENSG00000115020	-0.596868	6.22236	3.42077e-19	1.70204e-18
KCNIP3	protein_coding	ENSG00000115041	0.711774	3.20128	3.21994e-14	1.25236e-13
NCL	protein_coding	ENSG00000115053	-1.62046	10.8306	6.71994e-113	5.30699e-111
ZAP70	protein_coding	ENSG00000115085	2.61087	-2.31427	0.00100911	0.00185673
ACTR3	protein_coding	ENSG00000115091	-0.706367	8.29493	1.77335e-27	1.24062e-26
SF3B6	protein_coding	ENSG00000115128	-0.830978	6.60247	3.57788e-27	2.47006e-26
TP53I3	protein_coding	ENSG00000115129	1.15609	5.67436	1.6777e-64	3.96573e-63
OTOF	protein_coding	ENSG00000115155	5.56758	-1.89766	2.53173e-14	9.9222e-14
CENPA	protein_coding	ENSG00000115163	0.99122	6.2686	2.9413e-46	4.08811e-45
SLC30A3	protein_coding	ENSG00000115194	1.16973	3.30904	5.45923e-20	2.80975e-19
FNDC4	protein_coding	ENSG00000115226	0.804604	1.75861	1.61285e-08	4.47782e-08
PSMD14	protein_coding	ENSG00000115233	-1.08711	7.11957	9.73923e-58	1.87671e-56
REEP6	protein_coding	ENSG00000115255	0.746236	2.60836	1.28821e-11	4.34096e-11
PCSK4	protein_coding	ENSG00000115257	2.35595	0.732453	9.10877e-31	7.19826e-30
IFIH1	protein_coding	ENSG00000115267	1.77384	1.42377	5.07644e-37	5.08425e-36
TTC31	protein_coding	ENSG00000115282	0.855787	5.04587	1.03972e-32	8.91237e-32
PCGF1	protein_coding	ENSG00000115289	-0.703634	3.83587	2.87679e-17	1.31014e-16
GRB14	protein_coding	ENSG00000115290	1.00294	2.32069	3.24552e-19	1.61652e-18
CLIP4	protein_coding	ENSG00000115295	0.603971	6.33925	5.61385e-21	3.00424e-20
RTN4	protein_coding	ENSG00000115310	-1.14851	9.06761	9.57097e-72	2.75431e-70
GALNT3	protein_coding	ENSG00000115339	1.60825	-0.277764	2.36249e-09	6.9558e-09
TACR1	protein_coding	ENSG00000115353	-2.58719	-3.68629	0.0022714	0.0040014
CCDC88A	protein_coding	ENSG00000115355	-0.642095	7.28608	5.4843e-21	2.93687e-20
ACADL	protein_coding	ENSG00000115361	2.15292	1.95538	4.66512e-62	1.02526e-60
MRPL19	protein_coding	ENSG00000115364	-0.756314	6.23751	2.13291e-29	1.60548e-28
WDR75	protein_coding	ENSG00000115368	-0.691464	6.55578	1.08198e-24	6.757e-24
FANCL	protein_coding	ENSG00000115392	0.952736	4.48622	6.83347e-37	6.81001e-36
STAT1	protein_coding	ENSG00000115415	0.694922	7.0593	3.23454e-25	2.06003e-24
DNAH6	protein_coding	ENSG00000115423	1.04193	0.195656	7.92504e-07	1.95264e-06
ELMOD3	protein_coding	ENSG00000115459	0.898173	4.11478	6.75851e-29	5.00745e-28
IGFBP5	protein_coding	ENSG00000115461	-0.718589	6.17595	2.89571e-14	1.13045e-13
EFHD1	protein_coding	ENSG00000115468	1.41364	-0.128493	1.06814e-09	3.21043e-09
CCT4	protein_coding	ENSG00000115484	-1.15284	8.77959	5.13209e-67	1.3026e-65
COQ10B	protein_coding	ENSG00000115520	-0.894947	4.30335	4.26813e-25	2.70615e-24
SF3B1	protein_coding	ENSG00000115524	-0.892308	8.09301	1.1676e-42	1.43489e-41
PDCL3	protein_coding	ENSG00000115539	-1.188	5.4593	1.79629e-60	3.77881e-59
MOB4	protein_coding	ENSG00000115540	-0.986828	3.70186	2.09227e-29	1.57539e-28
HSPE1	protein_coding	ENSG00000115541	-1.26433	3.0829	3.93581e-33	3.41875e-32
IL1R1	protein_coding	ENSG00000115594	0.769032	3.97358	5.52438e-19	2.7262e-18
IL1RL1	protein_coding	ENSG00000115602	-1.61849	-0.794422	0.000251038	0.000495473
SLC9A2	protein_coding	ENSG00000115616	1.36381	2.20898	4.97411e-21	2.67079e-20
FHL2	protein_coding	ENSG00000115641	0.719812	6.9501	2.14857e-28	1.5546e-27
MLPH	protein_coding	ENSG00000115648	0.676353	1.8652	4.44263e-06	1.03172e-05
PASK	protein_coding	ENSG00000115687	1.90885	4.57398	6.55812e-141	8.9753e-139
TPO	protein_coding	ENSG00000115705	1.4638	-0.870186	0.0040882	0.00697841
ID2	protein_coding	ENSG00000115738	-1.91366	3.22793	1.14498e-88	5.31392e-87
TAF1B	protein_coding	ENSG00000115750	-0.677424	5.24504	2.37375e-22	1.3466e-21
HPCAL1	protein_coding	ENSG00000115756	-0.66262	5.56303	1.77545e-21	9.71719e-21
ODC1	protein_coding	ENSG00000115758	-1.90781	9.36637	2.15899e-138	2.811e-136
NOL10	protein_coding	ENSG00000115761	-1.24833	6.46609	1.63783e-74	5.07074e-73
PLEKHB2	protein_coding	ENSG00000115762	-1.01883	6.99592	3.3147e-53	5.53299e-52
CEBPZ	protein_coding	ENSG00000115816	-1.40215	7.27794	1.75136e-84	7.1988e-83
DARS	protein_coding	ENSG00000115866	-1.15004	6.72187	4.0374e-65	9.75416e-64
SRSF7	protein_coding	ENSG00000115875	-1.15898	8.06465	9.13889e-60	1.87503e-58
SDC1	protein_coding	ENSG00000115884	1.22636	7.7663	1.44514e-77	4.82121e-76
SLC1A4	protein_coding	ENSG00000115902	2.11756	6.11081	7.04756e-219	2.97815e-216
KYNU	protein_coding	ENSG00000115919	0.677581	-0.517988	0.00869338	0.0141389
WIPF1	protein_coding	ENSG00000115935	0.644398	4.87085	2.24866e-19	1.12887e-18
PNO1	protein_coding	ENSG00000115946	-1.67985	6.7368	3.76049e-104	2.4219e-102
RND3	protein_coding	ENSG00000115963	-1.48517	7.2936	1.63838e-39	1.79136e-38
AAK1	protein_coding	ENSG00000115977	-0.721792	6.60305	2.48806e-28	1.79538e-27
C2orf42	protein_coding	ENSG00000115998	-1.09843	3.44085	1.33422e-35	1.2758e-34
PCYOX1	protein_coding	ENSG00000116005	0.643589	6.85444	4.74536e-23	2.76625e-22
SUMO1	protein_coding	ENSG00000116030	-0.912472	7.01683	3.27164e-35	3.07708e-34
CD207	protein_coding	ENSG00000116031	2.84139	-1.21017	1.04404e-17	4.86042e-17
VAX2	protein_coding	ENSG00000116035	0.952136	-1.14525	0.00111924	0.00204671
MSH6	protein_coding	ENSG00000116062	-1.10695	7.74012	3.65908e-60	7.57835e-59
EPHA4	protein_coding	ENSG00000116106	0.746414	5.60591	4.76608e-23	2.77766e-22
PARD3B	protein_coding	ENSG00000116117	2.10117	3.17603	1.35405e-86	5.9408e-85
FARSB	protein_coding	ENSG00000116120	-0.820589	6.32152	1.92491e-33	1.69464e-32
ALMS1	protein_coding	ENSG00000116127	-0.931851	6.51602	5.5409e-35	5.17702e-34
PRRX1	protein_coding	ENSG00000116132	1.38408	2.72947	1.25098e-36	1.23899e-35
MORN1	protein_coding	ENSG00000116151	0.659658	2.97956	2.14865e-11	7.15435e-11
CACYBP	protein_coding	ENSG00000116161	-1.03998	7.19953	2.62946e-54	4.57298e-53
PAPPA2	protein_coding	ENSG00000116183	1.4921	4.11491	1.06662e-66	2.68461e-65
FAM20B	protein_coding	ENSG00000116199	-0.673495	6.88361	2.61647e-24	1.61184e-23
TCEANC2	protein_coding	ENSG00000116205	0.945146	3.44208	1.47447e-26	9.92054e-26
WRAP73	protein_coding	ENSG00000116213	1.04003	3.9192	5.75081e-35	5.3669e-34
CHD5	protein_coding	ENSG00000116254	1.77191	5.49836	3.86367e-132	4.43163e-130
ERRFI1	protein_coding	ENSG00000116285	-2.10653	7.07569	1.19013e-26	8.03666e-26
KIAA1324	protein_coding	ENSG00000116299	0.91931	4.69764	2.31534e-28	1.67275e-27
OPRD1	protein_coding	ENSG00000116329	-1.03091	1.79509	1.27299e-13	4.79628e-13
SRSF4	protein_coding	ENSG00000116350	-0.903369	6.66091	9.37533e-42	1.11243e-40
WDR77	protein_coding	ENSG00000116455	-0.845053	5.70517	6.95864e-35	6.47653e-34
ATP5PB	protein_coding	ENSG00000116459	-0.766696	7.63495	1.52917e-29	1.15718e-28
S100PBP	protein_coding	ENSG00000116497	0.671103	5.06335	6.24054e-22	3.47712e-21
TRIM62	protein_coding	ENSG00000116525	0.6795	3.42225	7.87392e-14	2.99667e-13
ASH1L	protein_coding	ENSG00000116539	-0.597628	7.09473	6.8856e-18	3.24123e-17
SFPQ	protein_coding	ENSG00000116560	-1.35994	9.75156	2.04621e-93	1.07614e-91
RHOU	protein_coding	ENSG00000116574	0.928792	2.12678	1.34058e-16	5.91184e-16
GON4L	protein_coding	ENSG00000116580	-0.772993	6.02859	1.6502e-28	1.20086e-27
MEF2D	protein_coding	ENSG00000116604	-1.62921	6.73613	2.97171e-136	3.68967e-134
DLEU2L	sense_intronic	ENSG00000116652	0.707199	-1.53708	0.0263764	0.039865
FBXO2	protein_coding	ENSG00000116661	1.74363	0.965008	1.70335e-25	1.09819e-24
FBXO6	protein_coding	ENSG00000116663	1.51064	-1.69186	0.000101075	0.000207411
C1orf21	protein_coding	ENSG00000116667	0.910273	4.21845	3.63153e-33	3.16014e-32
DNAJC6	protein_coding	ENSG00000116675	1.80138	3.61313	2.07929e-87	9.37902e-86
LEPR	protein_coding	ENSG00000116678	-0.859135	4.56733	7.80367e-30	5.9672e-29
MIIP	protein_coding	ENSG00000116691	0.680853	4.3	7.67209e-15	3.0944e-14
SMG7	protein_coding	ENSG00000116698	-0.619265	7.22763	2.02979e-21	1.10665e-20
NCF2	protein_coding	ENSG00000116701	0.902137	6.19679	6.10966e-36	5.92207e-35
GADD45A	protein_coding	ENSG00000116717	-1.03107	6.37175	2.59217e-31	2.09031e-30
RGS2	protein_coding	ENSG00000116741	-2.17188	4.05444	1.92037e-20	1.00513e-19
UCHL5	protein_coding	ENSG00000116750	-0.635306	4.23257	2.14039e-15	8.88736e-15
CTH	protein_coding	ENSG00000116761	0.897274	3.88671	2.16821e-25	1.39009e-24
CFHR3	protein_coding	ENSG00000116785	3.26963	-1.42201	2.59937e-19	1.30033e-18
CRYZ	protein_coding	ENSG00000116791	-0.6513	4.83441	1.06415e-19	5.41449e-19
PHTF1	protein_coding	ENSG00000116793	0.664991	5.91537	1.58441e-23	9.41152e-23
TFAP2E	protein_coding	ENSG00000116819	-1.08386	0.802107	1.2765e-11	4.3021e-11
TTF2	protein_coding	ENSG00000116830	0.819024	6.56379	1.80773e-34	1.6594e-33
OSCP1	protein_coding	ENSG00000116885	0.711579	0.0887554	0.000935162	0.00172687
TSNAX	protein_coding	ENSG00000116918	-0.649546	4.52401	2.29734e-17	1.05241e-16
NT5C1A	protein_coding	ENSG00000116981	0.982319	-2.05258	0.025756	0.0389959
RLF	protein_coding	ENSG00000117000	-1.1469	5.88769	1.15815e-56	2.14092e-55
ZNF684	protein_coding	ENSG00000117010	0.726613	2.36272	4.76511e-11	1.55504e-10
RIMS3	protein_coding	ENSG00000117016	1.26142	3.40861	1.94575e-42	2.37303e-41
ETV3	protein_coding	ENSG00000117036	-0.769511	5.48666	1.10875e-26	7.50181e-26
SDHB	protein_coding	ENSG00000117118	-0.818862	6.20928	1.08126e-34	9.99397e-34
RPF1	protein_coding	ENSG00000117133	-1.28247	6.183	5.40538e-65	1.2981e-63
KDM5B	protein_coding	ENSG00000117139	-0.735528	6.28137	6.25228e-28	4.44244e-27
UAP1	protein_coding	ENSG00000117143	-0.848523	7.32304	2.69312e-28	1.93987e-27
RGS4	protein_coding	ENSG00000117152	-3.1052	5.76931	3.13635e-40	3.53345e-39
ZNHIT6	protein_coding	ENSG00000117174	-1.07621	6.0874	1.39684e-52	2.29506e-51
GBP1	protein_coding	ENSG00000117228	3.28257	2.34219	1.7774e-100	1.04675e-98
CDK18	protein_coding	ENSG00000117266	0.732596	4.3281	1.84263e-19	9.29301e-19
ID3	protein_coding	ENSG00000117318	-1.62187	5.46073	4.95023e-81	1.80935e-79
PRPF3	protein_coding	ENSG00000117360	-0.936951	6.30689	8.37216e-46	1.14775e-44
EBNA1BP2	protein_coding	ENSG00000117395	-1.67886	8.16307	5.28061e-126	5.38958e-124
CDC20	protein_coding	ENSG00000117399	-2.13079	8.52592	1.59668e-223	7.396e-221
ARTN	protein_coding	ENSG00000117407	2.45001	-1.86132	2.77297e-06	6.54188e-06
PTCH2	protein_coding	ENSG00000117425	1.071	0.223415	3.52839e-07	8.92171e-07
PRDX1	protein_coding	ENSG00000117450	-0.710419	8.88409	1.70836e-25	1.10113e-24
TSPAN1	protein_coding	ENSG00000117472	1.93686	0.60909	3.1514e-23	1.84646e-22
BLZF1	protein_coding	ENSG00000117475	-0.792251	5.45734	7.22897e-28	5.12733e-27
FAAH	protein_coding	ENSG00000117480	-0.937781	0.0922502	9.30289e-06	2.10186e-05
DR1	protein_coding	ENSG00000117505	-0.938695	6.98705	2.75746e-42	3.33094e-41
PRRC2C	protein_coding	ENSG00000117523	-1.14895	8.86769	1.08858e-56	2.01696e-55
F3	protein_coding	ENSG00000117525	-2.37166	4.9238	1.1867e-82	4.54437e-81
FASLG	protein_coding	ENSG00000117560	-4.58618	-2.82286	1.30713e-06	3.16621e-06
PTBP2	protein_coding	ENSG00000117569	-0.62457	4.6899	2.87346e-16	1.24484e-15
TNFSF4	protein_coding	ENSG00000117586	-1.81006	-0.654822	1.09752e-12	3.92342e-12
DARS2	protein_coding	ENSG00000117593	-0.663857	5.79644	2.74378e-23	1.61233e-22
IRF6	protein_coding	ENSG00000117595	0.870654	-1.18259	0.0155077	0.0242981
UTP25	protein_coding	ENSG00000117597	-1.99107	6.49319	3.9155e-158	7.4262e-156
PLPPR4	protein_coding	ENSG00000117600	2.07405	0.0963111	8.92761e-24	5.36525e-23
RCAN3	protein_coding	ENSG00000117602	0.653657	4.17167	1.97169e-15	8.20387e-15
SYF2	protein_coding	ENSG00000117614	-0.924973	5.44116	7.59546e-32	6.26977e-31
RSRP1	protein_coding	ENSG00000117616	0.805763	5.98643	2.10015e-30	1.63816e-29
MAN1C1	protein_coding	ENSG00000117643	2.84153	2.35925	1.62786e-118	1.43103e-116
PROX1	protein_coding	ENSG00000117707	-1.40907	2.29702	1.5064e-37	1.53748e-36
PPP1R8	protein_coding	ENSG00000117751	-0.700645	5.89349	5.23356e-24	3.18014e-23
STX12	protein_coding	ENSG00000117758	0.599267	4.6471	3.44087e-16	1.48345e-15
2019-03-02	protein_coding	ENSG00000117791	1.38945	2.77843	1.30033e-37	1.32998e-36
ESYT2	protein_coding	ENSG00000117868	-0.686274	5.95821	1.46005e-25	9.43605e-25
CD3EAP	protein_coding	ENSG00000117877	-1.57943	6.93173	6.25171e-116	5.21055e-114
STAG1	protein_coding	ENSG00000118007	-0.930768	6.61863	2.51431e-44	3.25254e-43
STK11	protein_coding	ENSG00000118046	-0.677171	5.99574	2.86431e-24	1.76002e-23
IFT46	protein_coding	ENSG00000118096	-0.621963	4.68647	2.26719e-17	1.0388e-16
APOA1	protein_coding	ENSG00000118137	1.03564	-1.88302	0.0070321	0.0115912
ZNF541	protein_coding	ENSG00000118156	2.75499	-3.28424	0.00255705	0.00448004
KIF14	protein_coding	ENSG00000118193	0.900725	6.51159	1.10937e-35	1.06502e-34
TNNT2	protein_coding	ENSG00000118194	0.902095	4.73648	1.02708e-16	4.55351e-16
CAMSAP2	protein_coding	ENSG00000118200	-0.808729	6.82142	1.44792e-33	1.28033e-32
FASTKD2	protein_coding	ENSG00000118246	-0.925126	5.70414	7.18733e-44	9.15017e-43
KLF7	protein_coding	ENSG00000118263	-0.748566	5.49058	5.65856e-24	3.43147e-23
C1orf54	protein_coding	ENSG00000118292	1.99688	0.209644	1.98383e-18	9.57606e-18
LRMP	protein_coding	ENSG00000118308	1.32635	-3.13673	0.0150478	0.0236405
ATP10B	protein_coding	ENSG00000118322	2.08593	-3.38953	0.0151577	0.023793
USP35	protein_coding	ENSG00000118369	0.688488	3.89145	5.58147e-15	2.26408e-14
FILIP1	protein_coding	ENSG00000118407	2.97635	-1.65182	2.34949e-16	1.02226e-15
PLAGL1	protein_coding	ENSG00000118495	2.09282	6.20982	7.77481e-210	2.92612e-207
FBXO30	protein_coding	ENSG00000118496	-0.967188	5.32072	1.57051e-42	1.92318e-41
TNFAIP3	protein_coding	ENSG00000118503	-4.20936	5.23632	2.68766e-85	1.13947e-83
AKAP7	protein_coding	ENSG00000118507	1.18325	1.82206	2.01686e-19	1.01526e-18
MYB	protein_coding	ENSG00000118513	1.45336	0.835874	2.44785e-20	1.27539e-19
ALDH8A1	protein_coding	ENSG00000118514	-0.988514	0.150077	2.24191e-06	5.3313e-06
SGK1	protein_coding	ENSG00000118515	-1.82616	4.915	1.7915e-110	1.32368e-108
RNF146	protein_coding	ENSG00000118518	0.916916	3.33669	2.1687e-24	1.33908e-23
TCF21	protein_coding	ENSG00000118526	1.83698	-1.43936	3.24084e-07	8.22052e-07
PMFBP1	protein_coding	ENSG00000118557	1.72025	1.24202	1.29976e-19	6.59102e-19
MED28	protein_coding	ENSG00000118579	-0.776053	5.31511	2.85106e-30	2.21742e-29
SLC16A7	protein_coding	ENSG00000118596	1.03733	3.79506	6.33149e-36	6.13215e-35
VAMP8	protein_coding	ENSG00000118640	1.54116	0.928718	4.87689e-16	2.08686e-15
FOXO3	protein_coding	ENSG00000118689	-0.683928	5.4659	3.09451e-23	1.81445e-22
ARMC2	protein_coding	ENSG00000118690	0.606418	0.608087	0.000605317	0.00114598
PKD2	protein_coding	ENSG00000118762	2.16099	5.2577	5.23811e-187	1.4671e-184
PPL	protein_coding	ENSG00000118898	2.8431	-0.0431412	3.11589e-27	2.15792e-26
UBN1	protein_coding	ENSG00000118900	-0.601285	6.96631	2.04294e-20	1.06835e-19
PCDH17	protein_coding	ENSG00000118946	1.50624	2.34967	2.20217e-40	2.49617e-39
WDR35	protein_coding	ENSG00000118965	-1.62862	5.15677	9.9019e-111	7.40706e-109
ELL2	protein_coding	ENSG00000118985	-1.66058	7.12191	1.69602e-82	6.4537e-81
DNAH7	protein_coding	ENSG00000118997	-1.77669	-1.73143	1.61905e-07	4.18973e-07
SATB2	protein_coding	ENSG00000119042	-0.801509	4.18098	4.65642e-26	3.06949e-25
KLF9	protein_coding	ENSG00000119138	-0.877673	4.45204	5.68145e-29	4.21463e-28
PIGZ	protein_coding	ENSG00000119227	2.79302	-0.933508	1.22581e-17	5.68795e-17
SENP5	protein_coding	ENSG00000119231	-0.785468	6.02996	2.74282e-30	2.1353e-29
C1orf198	protein_coding	ENSG00000119280	1.34339	5.41659	2.87761e-85	1.21389e-83
HEATR1	protein_coding	ENSG00000119285	-1.11059	7.15818	1.15e-56	2.12914e-55
[truncated: 8,985 more rows]

## Sheet: G1_vs_G1S_category
3prime_overlapping_ncRNA	1
antisense	966
bidirectional_promoter_lncRNA	21
IG_C_gene	1
IG_C_pseudogene	1
IG_V_gene	4
IG_V_pseudogene	4
lincRNA	1126
macro_lncRNA	1
miRNA	44
misc_RNA	37
Mt_rRNA	1
Mt_tRNA	9
polymorphic_pseudogene	5
processed_pseudogene	390
processed_transcript	157
protein_coding	7292
pseudogene	1
rRNA	2
rRNA_pseudogene	4
scaRNA	3
scRNA	1
sense_intronic	166
sense_overlapping	53
snoRNA	36
snRNA	19
TEC	146
TR_C_gene	1
TR_V_gene	5
TR_V_pseudogene	2
transcribed_processed_pseudogene	85
transcribed_unitary_pseudogene	31
transcribed_unprocessed_pseudogene	224
unitary_pseudogene	5
unprocessed_pseudogene	140

## Sheet: G1S_vs_S
gene_names	bio_type	ensemble_id	logFC	logCPM	PValue	FDR
STPG1	protein_coding	ENSG00000001460	-0.607495	3.31765	2.12948e-11	2.10302e-10
RAD52	protein_coding	ENSG00000002016	-0.897361	3.7071	2.29289e-22	5.54507e-21
CASP10	protein_coding	ENSG00000003400	-0.839721	0.358882	1.37949e-07	8.68247e-07
MTMR7	protein_coding	ENSG00000003987	1.93981	-1.79255	2.58896e-07	1.56135e-06
SARM1	protein_coding	ENSG00000004139	1.01673	1.28884	5.55538e-11	5.25167e-10
PLXND1	protein_coding	ENSG00000004399	0.618371	6.87516	4.14687e-18	7.45416e-17
CAMKK1	protein_coding	ENSG00000004660	0.929343	4.50503	6.52107e-37	3.26555e-35
ARHGAP33	protein_coding	ENSG00000004777	-0.77432	3.60313	4.25402e-16	6.48522e-15
PDK4	protein_coding	ENSG00000004799	1.17702	-0.338028	3.41429e-07	2.02811e-06
ABCB5	protein_coding	ENSG00000004846	-1.00976	-1.98398	0.00309334	0.0086861
CALCR	protein_coding	ENSG00000004948	1.48436	-2.20808	0.000709717	0.00231326
DVL2	protein_coding	ENSG00000004975	-0.635075	4.72456	7.12277e-20	1.45149e-18
PRSS22	protein_coding	ENSG00000005001	2.75874	-3.42912	3.79592e-05	0.000160746
MEOX1	protein_coding	ENSG00000005102	1.65902	-0.870242	3.1465e-08	2.15679e-07
THSD7A	protein_coding	ENSG00000005108	-1.14791	-2.42918	0.00131241	0.0040378
ACSM3	protein_coding	ENSG00000005187	-1.12562	0.490349	5.44832e-11	5.15248e-10
TSPOAP1	protein_coding	ENSG00000005379	0.747959	0.25538	3.14845e-05	0.000135519
MPO	protein_coding	ENSG00000005381	5.55885	-1.43448	4.1493e-30	1.5166e-28
CROT	protein_coding	ENSG00000005469	-0.707633	2.59327	4.97105e-13	5.72086e-12
SOX8	protein_coding	ENSG00000005513	2.17941	2.09253	1.02163e-77	1.87847e-75
ITGA2B	protein_coding	ENSG00000005961	-0.806742	-1.10513	0.00115363	0.00359848
ASB4	protein_coding	ENSG00000005981	1.2659	-2.62949	0.00912384	0.022626
KRT33A	protein_coding	ENSG00000006059	3.61422	-2.6558	7.82266e-11	7.29197e-10
MAP3K14	protein_coding	ENSG00000006062	0.590227	5.06633	2.03049e-14	2.67551e-13
TNFRSF12A	protein_coding	ENSG00000006327	0.981151	7.59992	4.87386e-45	3.19013e-43
KDM7A	protein_coding	ENSG00000006459	0.844146	4.08819	2.16738e-15	3.09642e-14
ARHGAP44	protein_coding	ENSG00000006740	-0.653343	2.67151	7.9818e-12	8.21263e-11
NOS2	protein_coding	ENSG00000007171	-1.04207	1.41939	5.8481e-17	9.59982e-16
SLC13A2	protein_coding	ENSG00000007216	8.42304	-2.53722	1.94556e-16	3.04106e-15
SCN4A	protein_coding	ENSG00000007314	0.876939	0.52873	7.06138e-06	3.41541e-05
E2F2	protein_coding	ENSG00000007968	-1.29453	3.79886	1.89293e-54	1.75366e-52
SYN1	protein_coding	ENSG00000008056	2.00315	2.22943	4.88263e-64	6.15749e-62
MMP25	protein_coding	ENSG00000008516	1.67353	0.325827	3.68295e-16	5.63603e-15
IL32	protein_coding	ENSG00000008517	0.812872	3.96747	3.05241e-23	7.79677e-22
MAPK8IP2	protein_coding	ENSG00000008735	0.966286	-1.06613	0.000581572	0.00193165
REV3L	protein_coding	ENSG00000009413	-0.752512	5.25113	2.71512e-22	6.51386e-21
ETV7	protein_coding	ENSG00000010030	3.84846	0.713713	5.3043e-82	1.10142e-79
GIPR	protein_coding	ENSG00000010310	1.04796	0.225825	1.10105e-07	7.04034e-07
PLAUR	protein_coding	ENSG00000011422	1.2116	7.14705	9.44903e-66	1.27865e-63
TMEM159	protein_coding	ENSG00000011638	-0.980348	2.9614	1.86837e-26	5.64661e-25
CD22	protein_coding	ENSG00000012124	0.63233	0.331635	0.000712103	0.00232072
NR1H4	protein_coding	ENSG00000012504	2.89401	-3.55577	0.000101091	0.000395868
RWDD2A	protein_coding	ENSG00000013392	-0.68823	1.55312	5.60645e-09	4.25159e-08
MAMLD1	protein_coding	ENSG00000013619	1.50582	4.55973	1.48429e-70	2.35212e-68
POLA2	protein_coding	ENSG00000014138	-0.624455	2.05988	1.25805e-09	1.02477e-08
CCDC88C	protein_coding	ENSG00000015133	2.91626	-0.433151	1.82102e-28	6.10053e-27
IGF1	protein_coding	ENSG00000017427	3.42973	-2.5817	1.09917e-09	9.01456e-09
WWTR1	protein_coding	ENSG00000018408	0.947659	6.01185	3.02292e-43	1.83408e-41
ATP1A2	protein_coding	ENSG00000018625	-1.14791	1.33371	2.74215e-20	5.76857e-19
TTC27	protein_coding	ENSG00000018699	0.593448	5.11253	8.25552e-16	1.22823e-14
MARCO	protein_coding	ENSG00000019169	0.782617	4.08164	9.81447e-19	1.84833e-17
CYP24A1	protein_coding	ENSG00000019186	2.39595	5.9735	6.28369e-246	1.68172e-242
PRDM11	protein_coding	ENSG00000019485	-0.741705	4.26309	1.04468e-23	2.74109e-22
SYT13	protein_coding	ENSG00000019505	1.39017	0.28468	8.28303e-14	1.02736e-12
SNAI2	protein_coding	ENSG00000019549	0.818539	4.79819	2.30924e-28	7.72539e-27
CD74	protein_coding	ENSG00000019582	1.74898	-2.73229	0.00204913	0.00601551
RUNX3	protein_coding	ENSG00000020633	1.32285	3.97168	6.19237e-60	6.81076e-58
ZNF839	protein_coding	ENSG00000022976	0.913135	2.52576	4.08769e-19	7.94034e-18
GRAMD1B	protein_coding	ENSG00000023171	2.16429	5.09361	8.11853e-189	1.1503e-185
BIRC3	protein_coding	ENSG00000023445	3.92502	5.58688	7.47605e-50	5.80889e-48
CD44	protein_coding	ENSG00000026508	0.800055	8.60747	2.79645e-36	1.36077e-34
INSRR	protein_coding	ENSG00000027644	3.02374	-0.893045	3.19164e-21	7.17805e-20
SH2D2A	protein_coding	ENSG00000027869	3.75275	3.09175	3.17763e-241	7.65396e-238
TNFRSF1B	protein_coding	ENSG00000028137	0.948023	-1.2793	0.000171041	0.000639928
POU2F2	protein_coding	ENSG00000028277	2.20706	4.35295	5.98759e-161	5.76892e-158
BRD9	protein_coding	ENSG00000028310	0.829159	5.86177	5.33959e-36	2.55695e-34
BAK1	protein_coding	ENSG00000030110	0.608195	5.62089	2.28081e-17	3.87432e-16
IKZF2	protein_coding	ENSG00000030419	-0.785791	2.9963	1.57378e-17	2.72129e-16
CHPF2	protein_coding	ENSG00000033100	0.601922	4.01807	3.69965e-14	4.74513e-13
LRRC7	protein_coding	ENSG00000033122	-1.11102	-0.186323	8.94341e-09	6.6019e-08
GAB2	protein_coding	ENSG00000033327	-0.701602	4.5145	1.65038e-21	3.76447e-20
ATP6V0A1	protein_coding	ENSG00000033627	-0.677497	-0.140471	0.000380567	0.00131914
MAP2K3	protein_coding	ENSG00000034152	1.24212	6.92867	1.85114e-66	2.59235e-64
EFCAB1	protein_coding	ENSG00000034239	1.58193	-1.90237	3.58288e-05	0.00015261
MYOM2	protein_coding	ENSG00000036448	0.617648	1.77778	1.4939e-07	9.32701e-07
USP2	protein_coding	ENSG00000036672	-0.709107	-0.841947	0.00167523	0.00502319
TRIO	protein_coding	ENSG00000038382	0.710411	8.49665	1.46392e-26	4.45784e-25
VCAN	protein_coding	ENSG00000038427	1.34144	-0.959072	5.26125e-06	2.59688e-05
BEST2	protein_coding	ENSG00000039987	1.27197	-1.97014	0.00203313	0.00597147
RTN4R	protein_coding	ENSG00000040608	-0.643638	3.87565	2.67383e-13	3.15246e-12
CDH10	protein_coding	ENSG00000040731	-1.36101	0.187035	0.00174188	0.00520425
MYO16	protein_coding	ENSG00000041515	-1.17314	1.86192	3.3476e-23	8.53265e-22
TNC	protein_coding	ENSG00000041982	0.651735	8.97666	1.61944e-22	3.94412e-21
THAP3	protein_coding	ENSG00000041988	-0.586445	2.90304	4.713e-09	3.60731e-08
LCP2	protein_coding	ENSG00000043462	2.86668	-3.50428	0.00147995	0.00449584
FAM214A	protein_coding	ENSG00000047346	-1.27598	2.29458	2.38252e-28	7.95948e-27
ARHGAP6	protein_coding	ENSG00000047648	-0.749074	0.796204	1.99137e-06	1.0542e-05
ROS1	protein_coding	ENSG00000047936	0.718678	3.86956	9.21662e-18	1.61926e-16
USP28	protein_coding	ENSG00000048028	-0.68935	5.90125	3.73892e-23	9.47994e-22
KITLG	protein_coding	ENSG00000049130	1.44235	5.25265	2.00255e-69	3.03367e-67
H6PD	protein_coding	ENSG00000049239	1.29952	4.91852	7.45088e-68	1.08114e-65
PER3	protein_coding	ENSG00000049246	-0.614113	5.40136	2.91226e-18	5.27823e-17
TNFRSF9	protein_coding	ENSG00000049249	1.11299	4.363	4.5672e-46	3.12529e-44
EPN3	protein_coding	ENSG00000049283	-1.56234	-0.427053	2.60641e-15	3.70168e-14
FOXP3	protein_coding	ENSG00000049768	1.33453	0.787331	7.281e-17	1.18259e-15
PPP1R3F	protein_coding	ENSG00000049769	0.818456	1.53294	1.34283e-10	1.21688e-09
NEXMIF	protein_coding	ENSG00000050030	-1.74132	0.0698142	4.56953e-20	9.43155e-19
LETMD1	protein_coding	ENSG00000050426	-0.631071	4.85094	2.65384e-18	4.82802e-17
TNIP3	protein_coding	ENSG00000050730	0.937843	-0.363172	2.06881e-05	9.17537e-05
HERPUD1	protein_coding	ENSG00000051108	1.10872	6.70387	2.1483e-65	2.8589e-63
CYBA	protein_coding	ENSG00000051523	-1.82091	-1.74717	3.52192e-09	2.73653e-08
RRP12	protein_coding	ENSG00000052749	0.767535	6.7664	2.31531e-31	8.89457e-30
FNIP2	protein_coding	ENSG00000052795	-0.7184	4.15846	8.17041e-20	1.65657e-18
ALX4	protein_coding	ENSG00000052850	-1.17231	-0.839029	1.49345e-07	9.3266e-07
FSTL4	protein_coding	ENSG00000053108	-0.799217	-0.81303	0.000452663	0.00154132
FOXN3	protein_coding	ENSG00000053254	-0.69441	6.16168	5.13136e-23	1.28615e-21
LAMA3	protein_coding	ENSG00000053747	1.94438	4.1634	3.47221e-120	1.41754e-117
OPN3	protein_coding	ENSG00000054277	0.630983	-0.136459	0.0147432	0.0343243
USP36	protein_coding	ENSG00000055483	0.844786	7.25979	6.40204e-38	3.28797e-36
ZNF280C	protein_coding	ENSG00000056277	0.603491	3.19479	2.23089e-11	2.19418e-10
TRAF1	protein_coding	ENSG00000056558	3.65496	3.75293	2.46168e-91	5.98935e-89
IL17RB	protein_coding	ENSG00000056736	-0.614986	1.73245	7.15265e-08	4.68168e-07
DCBLD2	protein_coding	ENSG00000057019	0.744402	9.45978	7.80212e-29	2.66189e-27
PKP2	protein_coding	ENSG00000057294	-0.887208	5.22192	1.70891e-38	9.06661e-37
PRDM1	protein_coding	ENSG00000057657	1.64856	3.00888	1.88988e-46	1.31186e-44
TMCC3	protein_coding	ENSG00000057704	0.606714	0.184032	0.00173404	0.00518274
LAMC2	protein_coding	ENSG00000058085	1.02774	7.93139	7.22333e-60	7.90856e-58
RASGRF1	protein_coding	ENSG00000058335	0.805895	6.87306	1.59496e-33	6.7637e-32
CAMK2B	protein_coding	ENSG00000058404	0.969934	0.798727	4.03988e-10	3.4753e-09
FLYWCH1	protein_coding	ENSG00000059122	-0.875981	5.22279	2.71994e-35	1.25991e-33
STYK1	protein_coding	ENSG00000060140	-0.60861	2.3092	4.34154e-09	3.34105e-08
GNA15	protein_coding	ENSG00000060558	1.05471	-1.17654	0.000124642	0.000479748
LZTS1	protein_coding	ENSG00000061337	-1.53758	2.94456	1.35563e-63	1.66597e-61
PRDM6	protein_coding	ENSG00000061455	-1.62426	-2.00484	1.10191e-06	6.07499e-06
GUCY1B1	protein_coding	ENSG00000061918	-0.612381	1.28558	8.23848e-06	3.93968e-05
CDH3	protein_coding	ENSG00000062038	1.16458	-1.10112	0.000240066	0.000870986
SLC6A16	protein_coding	ENSG00000063127	-0.742933	2.57726	0.000145601	0.000552296
LIMCH1	protein_coding	ENSG00000064042	0.917608	7.49855	3.74107e-36	1.80946e-34
DMRT3	protein_coding	ENSG00000064218	-0.902491	-1.50758	0.000862071	0.0027642
ATP2C2	protein_coding	ENSG00000064270	1.7661	-1.61337	3.25036e-05	0.000139532
NGFR	protein_coding	ENSG00000064300	1.02198	2.4848	1.58738e-16	2.50394e-15
LPAR2	protein_coding	ENSG00000064547	-0.69535	1.77421	2.44476e-07	1.47989e-06
SNX24	protein_coding	ENSG00000064652	-0.64215	4.77643	4.44799e-18	7.97756e-17
SNCAIP	protein_coding	ENSG00000064692	1.78296	-0.148473	8.37885e-16	1.24484e-14
BCAS1	protein_coding	ENSG00000064787	2.58614	-1.55704	2.08547e-13	2.49047e-12
SBNO2	protein_coding	ENSG00000064932	0.604367	5.33494	6.48826e-17	1.06098e-15
CALCRL	protein_coding	ENSG00000064989	-0.943184	-1.67416	0.00149063	0.00452486
UHRF1BP1	protein_coding	ENSG00000065060	-0.890416	6.3344	5.91538e-39	3.17336e-37
DGKA	protein_coding	ENSG00000065357	-0.756062	4.35617	1.42313e-22	3.48363e-21
ERBB3	protein_coding	ENSG00000065361	-1.6806	1.48606	1.11977e-36	5.51571e-35
ANKRD44	protein_coding	ENSG00000065413	-0.638609	3.19453	2.49152e-13	2.95051e-12
SNAP91	protein_coding	ENSG00000065609	-0.649705	-0.109633	0.000271775	0.000973563
PRKCQ	protein_coding	ENSG00000065675	-0.695764	3.39017	1.26954e-16	2.02379e-15
FOXJ2	protein_coding	ENSG00000065970	-0.663461	5.97671	2.1459e-24	5.86035e-23
TIE1	protein_coding	ENSG00000066056	2.81268	1.89077	3.51543e-102	1.05845e-99
KDM4A	protein_coding	ENSG00000066135	-0.585074	5.25228	1.8736e-17	3.21313e-16
SLC9A3	protein_coding	ENSG00000066230	0.999855	-1.95216	0.00319395	0.00892802
KIF26A	protein_coding	ENSG00000066735	-0.717514	3.85456	1.2922e-15	1.88867e-14
STAG3	protein_coding	ENSG00000066923	1.23224	-1.07612	0.000120939	0.000466613
KLF6	protein_coding	ENSG00000067082	0.632346	6.50212	1.09238e-13	1.3404e-12
RRP15	protein_coding	ENSG00000067533	0.838434	5.34519	3.03726e-29	1.06181e-27
NAV3	protein_coding	ENSG00000067798	1.1453	5.75667	1.437e-60	1.62503e-58
ATP2B3	protein_coding	ENSG00000067842	-0.911349	0.207001	8.03267e-07	4.53228e-06
CBFB	protein_coding	ENSG00000067955	0.974919	6.75596	6.02715e-48	4.41264e-46
PLEKHH3	protein_coding	ENSG00000068137	-1.1121	3.93321	4.60819e-46	3.14441e-44
ACSL4	protein_coding	ENSG00000068366	0.61795	6.33185	4.09903e-19	7.95596e-18
REEP1	protein_coding	ENSG00000068615	-0.653158	2.41964	1.35782e-11	1.36787e-10
PPP2R5B	protein_coding	ENSG00000068971	-1.09314	3.05868	3.48437e-34	1.51769e-32
PITX1	protein_coding	ENSG00000069011	-0.654421	4.39459	4.91645e-18	8.79811e-17
TRPC7	protein_coding	ENSG00000069018	3.93726	-3.5875	4.80346e-05	0.000199622
ADGRF5	protein_coding	ENSG00000069122	0.948647	2.35786	1.41338e-16	2.24565e-15
BCL3	protein_coding	ENSG00000069399	1.59644	3.74845	1.05378e-69	1.62707e-67
MAOB	protein_coding	ENSG00000069535	1.19581	3.44352	2.61307e-28	8.70554e-27
DRD4	protein_coding	ENSG00000069696	0.722673	-0.763836	0.0111348	0.0269145
TGFBR3	protein_coding	ENSG00000069702	-1.68036	2.4068	1.83803e-59	1.99427e-57
LRP6	protein_coding	ENSG00000070018	-0.628093	7.38905	7.43289e-20	1.51213e-18
CLTCL1	protein_coding	ENSG00000070371	-0.596623	5.09175	3.03675e-19	5.96048e-18
ASNS	protein_coding	ENSG00000070669	-1.31688	1.79387	4.74844e-31	1.80119e-29
CNGB1	protein_coding	ENSG00000070729	1.25093	-1.59764	9.67717e-05	0.000380189
CHAT	protein_coding	ENSG00000070748	0.675845	-0.281414	0.000524036	0.00175972
CAMK2A	protein_coding	ENSG00000070808	2.42102	-0.182049	1.82723e-29	6.45345e-28
SLC12A3	protein_coding	ENSG00000070915	1.90005	-2.42968	1.76962e-05	7.95535e-05
ATP2B1	protein_coding	ENSG00000070961	0.733892	7.05459	2.34698e-29	8.22877e-28
MGAT4A	protein_coding	ENSG00000071073	-1.02601	2.62663	3.30233e-26	9.89343e-25
ARHGAP10	protein_coding	ENSG00000071205	-0.690782	4.1905	6.4618e-19	1.2343e-17
CDH19	protein_coding	ENSG00000071991	6.85011	-2.77018	1.83456e-06	9.77848e-06
EPN2	protein_coding	ENSG00000072134	0.657574	5.83358	3.82201e-21	8.53205e-20
PTPN18	protein_coding	ENSG00000072135	-0.654422	5.81495	3.58621e-23	9.12156e-22
LNX1	protein_coding	ENSG00000072201	-1.05303	2.16078	1.87315e-23	4.84625e-22
MPP5	protein_coding	ENSG00000072415	-0.745054	7.39065	1.50176e-29	5.33523e-28
MOV10L1	protein_coding	ENSG00000073146	-1.15049	1.55579	3.26617e-20	6.81735e-19
TP63	protein_coding	ENSG00000073282	1.58558	-1.43787	5.36055e-07	3.09714e-06
ALPK1	protein_coding	ENSG00000073331	-0.645562	3.69469	1.12462e-13	1.37576e-12
LLGL2	protein_coding	ENSG00000073350	-1.15408	0.171774	1.72569e-11	1.71905e-10
PPP2R3A	protein_coding	ENSG00000073711	0.603801	5.6064	6.07425e-18	1.08058e-16
SCARF1	protein_coding	ENSG00000074660	2.15051	0.49931	1.73476e-29	6.13585e-28
ANO8	protein_coding	ENSG00000074855	-0.859532	3.12921	6.34629e-20	1.29765e-18
TXK	protein_coding	ENSG00000074966	-0.911174	-1.98564	0.00866549	0.0216117
WSCD2	protein_coding	ENSG00000075035	1.47623	-3.07242	0.0050268	0.0133325
KCNQ2	protein_coding	ENSG00000075043	0.790651	-1.30589	0.00324475	0.00905215
SEMA3A	protein_coding	ENSG00000075213	1.66439	3.53158	5.67237e-78	1.051e-75
SEMA3C	protein_coding	ENSG00000075223	0.65083	6.63328	3.35974e-22	7.99666e-21
SLC25A40	protein_coding	ENSG00000075303	-0.660366	4.20759	4.52399e-16	6.87464e-15
FGF4	protein_coding	ENSG00000075388	0.911963	-2.31672	0.0191704	0.0430944
PLD1	protein_coding	ENSG00000075651	-0.961214	4.10924	6.71833e-36	3.2108e-34
SEC31B	protein_coding	ENSG00000075826	-0.761199	2.61716	3.04998e-05	0.000131728
PAX2	protein_coding	ENSG00000075891	-0.821651	0.666967	1.36038e-07	8.56892e-07
PLXNA2	protein_coding	ENSG00000076356	1.30311	5.47667	1.29726e-57	1.32403e-55
ANKRD13A	protein_coding	ENSG00000076513	1.35653	5.71406	7.95284e-80	1.57017e-77
ACACB	protein_coding	ENSG00000076555	-0.929873	2.11532	1.07796e-17	1.88425e-16
CAMSAP3	protein_coding	ENSG00000076826	-0.607763	1.72512	1.46548e-06	7.9193e-06
RARB	protein_coding	ENSG00000077092	-0.594278	-0.185239	0.0014987	0.00454648
NFKB2	protein_coding	ENSG00000077150	1.04712	6.63627	2.90388e-50	2.31608e-48
IL4R	protein_coding	ENSG00000077238	1.1887	5.36336	2.04663e-65	2.73874e-63
ITGA8	protein_coding	ENSG00000077943	1.33815	-2.05731	0.00471814	0.0126021
AMPH	protein_coding	ENSG00000078053	-0.947133	4.8006	1.99824e-41	1.13786e-39
TULP3	protein_coding	ENSG00000078246	-0.878891	5.75594	6.6698e-39	3.57012e-37
SYNJ2	protein_coding	ENSG00000078269	0.799597	6.6569	4.74647e-33	1.98832e-31
ADCY2	protein_coding	ENSG00000078295	0.71146	1.77504	5.23594e-09	3.98352e-08
HOXA9	protein_coding	ENSG00000078399	-0.673633	3.22087	7.22716e-13	8.18048e-12
PKD2L2	protein_coding	ENSG00000078795	-1.06104	-2.35827	0.0133102	0.0314193
TP73	protein_coding	ENSG00000078900	-0.61401	3.27821	1.60101e-13	1.93398e-12
RUNX1T1	protein_coding	ENSG00000079102	-1.13405	-1.9548	0.000292482	0.00103909
SP140	protein_coding	ENSG00000079263	0.752235	3.27075	2.7103e-16	4.1848e-15
MKNK1	protein_coding	ENSG00000079277	1.50512	1.06946	1.40609e-21	3.22249e-20
PTPRH	protein_coding	ENSG00000080031	-0.610917	2.31539	1.44374e-07	9.05114e-07
DCT	protein_coding	ENSG00000080166	2.3078	-1.45067	4.0154e-09	3.09897e-08
RDH8	protein_coding	ENSG00000080511	4.60259	-1.75879	1.40489e-20	3.01332e-19
SESN1	protein_coding	ENSG00000080546	-1.10278	3.8647	1.75619e-44	1.13105e-42
COL5A3	protein_coding	ENSG00000080573	0.616418	5.11264	1.86273e-14	2.4666e-13
SRCAP	protein_coding	ENSG00000080603	0.793961	3.09929	1.58947e-11	1.58993e-10
KCNN2	protein_coding	ENSG00000080709	-0.603901	-0.0666943	0.00195391	0.00576128
CROCCP3	transcribed_unprocessed_pseudogene	ENSG00000080947	-0.612673	2.00958	3.58642e-06	1.81942e-05
MAGI3	protein_coding	ENSG00000081026	-0.702074	5.00968	1.09045e-22	2.69392e-21
TCF7	protein_coding	ENSG00000081059	1.81767	-1.38578	2.89916e-09	2.27466e-08
PHLPP1	protein_coding	ENSG00000081913	-0.806022	3.80728	4.07841e-22	9.67849e-21
ATP8B1	protein_coding	ENSG00000081923	-1.35419	3.23265	1.48967e-44	9.61973e-43
C5orf22	protein_coding	ENSG00000082213	-0.713791	5.26565	1.39046e-23	3.61684e-22
COL19A1	protein_coding	ENSG00000082293	1.70838	0.356173	2.38466e-18	4.35476e-17
COBLL1	protein_coding	ENSG00000082438	-0.6143	4.62846	1.42102e-16	2.2563e-15
DLG3	protein_coding	ENSG00000082458	0.65968	4.0096	1.42308e-16	2.25808e-15
SERTAD4	protein_coding	ENSG00000082497	-0.67274	5.93593	7.8602e-24	2.08053e-22
OPRK1	protein_coding	ENSG00000082556	-1.58472	-1.27479	1.20072e-08	8.69829e-08
TRPM3	protein_coding	ENSG00000083067	0.866647	-1.75439	0.0119221	0.0285369
ULK2	protein_coding	ENSG00000083290	-0.635757	2.05307	2.57231e-09	2.03212e-08
ZNF671	protein_coding	ENSG00000083814	-0.607765	2.17199	1.59183e-07	9.89993e-07
ZNF586	protein_coding	ENSG00000083828	-0.714337	2.41847	4.41672e-11	4.19336e-10
SLCO1A2	protein_coding	ENSG00000084453	-0.951946	0.0931862	1.54992e-07	9.65922e-07
GCKR	protein_coding	ENSG00000084734	2.95307	-3.95469	0.000558846	0.00186439
CD59	protein_coding	ENSG00000085063	0.711402	7.08858	9.36949e-27	2.89337e-25
CD82	protein_coding	ENSG00000085117	0.926941	5.12375	4.26381e-36	2.05816e-34
OVGP1	protein_coding	ENSG00000085465	0.904638	0.0817644	8.64865e-05	0.000343422
IGSF9	protein_coding	ENSG00000085552	-0.872497	3.58117	7.47018e-22	1.73514e-20
WNT11	protein_coding	ENSG00000085741	-1.03725	0.36228	2.24541e-08	1.57545e-07
AQP6	protein_coding	ENSG00000086159	2.29464	-3.34774	0.000171714	0.000642148
ITPKC	protein_coding	ENSG00000086544	0.60199	4.6424	7.52592e-17	1.21826e-15
FAT2	protein_coding	ENSG00000086570	0.666522	-1.07042	0.00751749	0.0190584
HSD17B2	protein_coding	ENSG00000086696	2.6016	-1.60551	1.33376e-10	1.20912e-09
MYBPC2	protein_coding	ENSG00000086967	1.47104	-2.00944	7.43715e-05	0.000299113
GNAO1	protein_coding	ENSG00000087258	-0.830289	3.83507	3.41238e-24	9.23528e-23
NID2	protein_coding	ENSG00000087303	0.95665	1.15747	3.52671e-10	3.0491e-09
PTHLH	protein_coding	ENSG00000087494	1.28749	4.02406	5.87826e-38	3.02542e-36
TFAP2C	protein_coding	ENSG00000087510	2.22485	-3.41873	0.0197702	0.0442529
CASS4	protein_coding	ENSG00000087589	1.76458	1.39486	5.83078e-27	1.81925e-25
GP6	protein_coding	ENSG00000088053	-0.920502	2.36026	3.39197e-19	6.63168e-18
DNMT3B	protein_coding	ENSG00000088305	-0.844258	4.99977	5.42347e-34	2.33277e-32
REM1	protein_coding	ENSG00000088320	1.83821	-3.55746	0.0172359	0.0392995
FER1L4	transcribed_unitary_pseudogene	ENSG00000088340	0.850424	1.98739	1.11407e-10	1.01955e-09
DOCK3	protein_coding	ENSG00000088538	-0.906549	2.90467	2.93061e-22	7.01685e-21
ARHGAP28	protein_coding	ENSG00000088756	-0.921938	3.41617	9.05598e-29	3.08531e-27
SMOX	protein_coding	ENSG00000088826	0.621582	4.68078	8.91815e-16	1.31867e-14
LZTS3	protein_coding	ENSG00000088899	-0.93683	5.35811	2.96051e-45	1.95906e-43
KIZ	protein_coding	ENSG00000088970	-0.597233	3.27335	1.67519e-11	1.6722e-10
P2RX7	protein_coding	ENSG00000089041	-0.69684	0.274393	0.000121093	0.000467057
LHX5	protein_coding	ENSG00000089116	0.714141	1.23092	3.68825e-07	2.18117e-06
SIRT4	protein_coding	ENSG00000089163	-0.694692	-0.654725	0.00202515	0.00594947
TBX5	protein_coding	ENSG00000089225	-1.20589	-1.81445	2.97626e-05	0.000128752
KCNH4	protein_coding	ENSG00000089558	2.03736	-1.58657	3.2217e-10	2.80554e-09
RCOR1	protein_coding	ENSG00000089902	0.709315	5.98186	4.04904e-26	1.20258e-24
ICAM1	protein_coding	ENSG00000090339	0.951937	-0.845322	0.000407399	0.0014026
TFAP4	protein_coding	ENSG00000090447	0.590544	4.10265	3.96674e-14	5.07149e-13
FETUB	protein_coding	ENSG00000090512	-2.07065	-3.0943	4.55894e-06	2.27777e-05
PITPNM2	protein_coding	ENSG00000090975	0.628591	3.95361	2.70085e-14	3.50325e-13
DTX2	protein_coding	ENSG00000091073	-0.825559	4.61808	1.09541e-28	3.71621e-27
LAMB1	protein_coding	ENSG00000091136	0.742043	8.16676	1.98009e-30	7.32632e-29
SLC26A4	protein_coding	ENSG00000091137	2.45868	-1.54402	1.32692e-06	7.22653e-06
ABCC6	protein_coding	ENSG00000091262	-1.04993	0.170181	2.36854e-10	2.09208e-09
ITGA6	protein_coding	ENSG00000091409	0.628076	8.24841	5.91101e-22	1.38098e-20
ESR1	protein_coding	ENSG00000091831	2.88122	-0.557623	4.34987e-25	1.22688e-23
ANGPT2	protein_coding	ENSG00000091879	2.9253	-3.14575	0.000530471	0.0017786
SEMA6A	protein_coding	ENSG00000092421	-1.01168	3.10044	5.55106e-30	2.01128e-28
WDR76	protein_coding	ENSG00000092470	-0.796753	4.6965	2.12493e-29	7.4611e-28
COL9A3	protein_coding	ENSG00000092758	1.19568	-0.966113	2.50454e-06	1.30465e-05
EZR	protein_coding	ENSG00000092820	0.71289	9.22908	2.25455e-25	6.44191e-24
EPB41L4B	protein_coding	ENSG00000095203	-0.752747	3.81383	1.55749e-16	2.45841e-15
PTGS1	protein_coding	ENSG00000095303	2.83948	2.70007	1.95559e-139	1.04676e-136
SH2D3C	protein_coding	ENSG00000095370	-1.93502	-0.385038	5.2364e-23	1.30975e-21
WHRN	protein_coding	ENSG00000095397	0.792405	3.26409	2.36468e-17	4.01112e-16
IL11	protein_coding	ENSG00000095752	3.38702	6.87358	2.30625e-62	2.75003e-60
CREM	protein_coding	ENSG00000095794	0.797159	4.52822	4.0624e-17	6.8094e-16
SMIM24	protein_coding	ENSG00000095932	2.62598	-2.73926	4.73174e-07	2.75564e-06
HIVEP1	protein_coding	ENSG00000095951	1.03521	5.08341	1.2806e-43	7.94998e-42
ZNF184	protein_coding	ENSG00000096654	-0.660726	3.86583	1.43697e-13	1.74194e-12
DSP	protein_coding	ENSG00000096696	1.25821	3.23725	1.33618e-37	6.81874e-36
IL12RB1	protein_coding	ENSG00000096996	1.62675	-3.5064	0.00719349	0.0183199
NRP1	protein_coding	ENSG00000099250	1.30966	7.1607	2.70811e-90	6.52301e-88
HSD17B7P2	transcribed_unprocessed_pseudogene	ENSG00000099251	-1.17572	1.39047	3.47716e-15	4.88649e-14
PALMD	protein_coding	ENSG00000099260	-2.53643	-3.90226	8.45509e-05	0.000336402
KCNK6	protein_coding	ENSG00000099337	0.68587	4.47474	1.46198e-18	2.71719e-17
CBARP	protein_coding	ENSG00000099625	0.660161	4.09531	5.47049e-14	6.89162e-13
MTAP	protein_coding	ENSG00000099810	1.06149	5.96889	6.69195e-52	5.59684e-50
RASSF7	protein_coding	ENSG00000099849	-0.722788	3.82366	2.04265e-18	3.7501e-17
MADCAM1	protein_coding	ENSG00000099866	-0.862087	-0.980535	0.00016381	0.000615263
ARVCF	protein_coding	ENSG00000099889	-1.21151	5.54328	1.04403e-69	1.62243e-67
SERPIND1	protein_coding	ENSG00000099937	4.90294	-1.43286	3.44469e-20	7.17133e-19
MMP11	protein_coding	ENSG00000099953	-2.6601	-3.63231	2.81485e-06	1.4559e-05
P2RX6	protein_coding	ENSG00000099957	-0.67822	1.36253	2.17096e-06	1.14025e-05
OSM	protein_coding	ENSG00000099985	2.1119	-4.09023	0.0102979	0.0251364
YPEL1	protein_coding	ENSG00000100027	-0.723688	1.4186	6.15244e-09	4.63395e-08
SLC35E4	protein_coding	ENSG00000100036	0.913058	5.06013	1.92348e-39	1.04584e-37
CYTH4	protein_coding	ENSG00000100055	2.99879	1.04156	1.66042e-67	2.39489e-65
MFNG	protein_coding	ENSG00000100060	0.642041	2.71289	8.20237e-09	6.09598e-08
CARD10	protein_coding	ENSG00000100065	0.703842	6.57936	9.38893e-26	2.74789e-24
GGTLC2	protein_coding	ENSG00000100121	-0.790135	-1.62253	0.00333135	0.00926643
CRYBB1	protein_coding	ENSG00000100122	1.33145	-0.492522	1.64813e-08	1.17555e-07
MICALL1	protein_coding	ENSG00000100139	-0.593132	7.22813	1.10504e-18	2.06975e-17
TTC28	protein_coding	ENSG00000100154	-0.653357	3.93643	2.84371e-15	4.02684e-14
2019-09-03	protein_coding	ENSG00000100167	-0.659113	3.71024	3.2877e-16	5.04722e-15
TPTEP1	transcribed_unprocessed_pseudogene	ENSG00000100181	-0.846404	4.7049	7.93901e-33	3.28569e-31
SUN2	protein_coding	ENSG00000100242	0.724148	6.49345	1.98667e-25	5.69678e-24
NEFH	protein_coding	ENSG00000100285	2.22579	-0.575131	2.76316e-18	5.01176e-17
BIK	protein_coding	ENSG00000100290	1.2885	-0.053418	4.86813e-10	4.15369e-09
RASD2	protein_coding	ENSG00000100302	1.05797	2.60946	7.31489e-24	1.94904e-22
TTLL12	protein_coding	ENSG00000100304	-0.599826	6.22999	2.82698e-20	5.93665e-19
PDGFB	protein_coding	ENSG00000100311	1.4024	2.35616	6.77181e-42	3.90222e-40
PNPLA5	protein_coding	ENSG00000100341	4.62291	-2.88767	9.78171e-12	9.99627e-11
PNPLA3	protein_coding	ENSG00000100344	-0.599987	4.18859	1.71048e-15	2.46643e-14
NCF4	protein_coding	ENSG00000100365	2.24831	-0.138659	4.01961e-23	1.01383e-21
CSF2RB	protein_coding	ENSG00000100368	1.8406	-2.19336	1.51176e-06	8.15354e-06
IL2RB	protein_coding	ENSG00000100385	0.706735	5.94314	2.849e-26	8.57797e-25
MLC1	protein_coding	ENSG00000100427	0.902856	0.711787	1.16913e-08	8.48983e-08
HDAC10	protein_coding	ENSG00000100429	-1.2032	-1.0072	6.15793e-07	3.5282e-06
ABHD4	protein_coding	ENSG00000100439	-1.0883	4.93122	1.49392e-51	1.23233e-49
GZMB	protein_coding	ENSG00000100453	1.71827	-0.739157	2.24764e-09	1.78618e-08
CDKL1	protein_coding	ENSG00000100490	0.696858	2.98314	1.62406e-13	1.95887e-12
CCDC198	protein_coding	ENSG00000100557	-0.98057	0.254286	2.09811e-08	1.4764e-07
CHGA	protein_coding	ENSG00000100604	0.81154	0.175107	7.53852e-06	3.62219e-05
ASB2	protein_coding	ENSG00000100628	5.29586	-1.6951	2.17834e-24	5.94222e-23
PAPLN	protein_coding	ENSG00000100767	-0.877852	3.44514	3.87085e-23	9.78355e-22
DHRS2	protein_coding	ENSG00000100867	2.04146	10.8172	2.75289e-174	3.31544e-171
MMP9	protein_coding	ENSG00000100985	1.51586	6.15919	1.1934e-116	4.49146e-114
ZMYND8	protein_coding	ENSG00000101040	0.855414	6.68023	1.17622e-38	6.26805e-37
NFATC2	protein_coding	ENSG00000101096	1.17894	4.22588	1.59781e-43	9.8431e-42
RIMS4	protein_coding	ENSG00000101098	-0.897037	4.67402	6.65038e-35	3.03386e-33
DOK5	protein_coding	ENSG00000101134	1.15639	3.82651	5.49465e-49	4.14889e-47
NTSR1	protein_coding	ENSG00000101188	1.88108	-0.0958976	4.47692e-18	8.02348e-17
SLC17A9	protein_coding	ENSG00000101194	1.63567	-2.97148	0.0033534	0.00931965
PTK6	protein_coding	ENSG00000101213	1.29333	-3.24516	0.0165639	0.0379724
RASSF2	protein_coding	ENSG00000101265	-0.872829	3.99833	1.20359e-29	4.30131e-28
PROKR2	protein_coding	ENSG00000101292	2.38455	0.0508526	3.08496e-29	1.07692e-27
SNPH	protein_coding	ENSG00000101298	-1.01165	4.04298	1.09498e-34	4.91152e-33
PDYN	protein_coding	ENSG00000101327	2.19788	-1.99422	1.09605e-08	7.9808e-08
PAK5	protein_coding	ENSG00000101349	-1.27761	-1.52388	1.03415e-05	4.85094e-05
E2F1	protein_coding	ENSG00000101412	-0.617179	5.39994	3.39625e-20	7.08272e-19
PXMP4	protein_coding	ENSG00000101417	-0.700149	2.38524	5.89136e-12	6.14042e-11
SLC32A1	protein_coding	ENSG00000101438	1.47314	-2.0439	0.00111984	0.0035017
PPP1R16B	protein_coding	ENSG00000101445	-1.30746	2.57257	2.20067e-36	1.07303e-34
CELF4	protein_coding	ENSG00000101489	-0.610968	0.756687	1.90026e-05	8.49193e-05
LPIN2	protein_coding	ENSG00000101577	-0.673314	6.04831	5.23691e-24	1.40469e-22
CEP76	protein_coding	ENSG00000101624	-0.585143	4.87754	1.42583e-16	2.26095e-15
ST8SIA5	protein_coding	ENSG00000101638	-1.15787	-1.68097	0.00046351	0.00157336
LIPG	protein_coding	ENSG00000101670	1.64026	-3.82763	0.0164805	0.0378208
NOL4	protein_coding	ENSG00000101746	-0.899335	-1.2527	0.000549515	0.0018353
POLI	protein_coding	ENSG00000101751	-0.598791	2.98252	2.12981e-10	1.88814e-09
MXRA5	protein_coding	ENSG00000101825	2.74677	-3.53945	0.000325758	0.00114715
ATP1B4	protein_coding	ENSG00000101892	4.05316	-2.35019	1.76338e-13	2.11843e-12
CACNA1F	protein_coding	ENSG00000102001	1.98869	-2.5712	1.65904e-05	7.49742e-05
SYP	protein_coding	ENSG00000102003	1.29879	4.39271	8.12787e-57	8.12349e-55
ZC3H12B	protein_coding	ENSG00000102053	-0.679873	1.21953	1.7274e-07	1.06988e-06
SCML2	protein_coding	ENSG00000102098	-0.639451	3.3956	3.38573e-14	4.35409e-13
PHEX	protein_coding	ENSG00000102174	0.7848	-0.643577	0.00141742	0.00432773
PCDH11X	protein_coding	ENSG00000102290	1.56093	1.63876	7.14515e-31	2.68911e-29
PORCN	protein_coding	ENSG00000102312	0.75297	4.28869	2.01847e-20	4.27607e-19
SYTL4	protein_coding	ENSG00000102362	-0.744362	4.21174	4.32239e-21	9.5957e-20
DRP2	protein_coding	ENSG00000102385	-0.590678	2.13433	1.39425e-06	7.56894e-06
ARMCX3	protein_coding	ENSG00000102401	-0.784497	5.73822	9.10348e-32	3.5539e-30
NALCN	protein_coding	ENSG00000102452	1.33142	-1.51413	4.31709e-05	0.000180562
HTR2A	protein_coding	ENSG00000102468	-2.99079	-0.0190463	3.13661e-57	3.17443e-55
CDADC1	protein_coding	ENSG00000102543	-0.875593	2.38273	6.18775e-15	8.50709e-14
FGF9	protein_coding	ENSG00000102678	-0.789008	-0.551123	0.00244111	0.00702832
FLT1	protein_coding	ENSG00000102755	2.0887	1.38895	1.05842e-42	6.31042e-41
DHRS12	protein_coding	ENSG00000102796	-0.811993	-1.38539	0.00319633	0.00893363
MEDAG	protein_coding	ENSG00000102802	2.91559	-2.56478	4.33136e-08	2.9183e-07
CORO1A	protein_coding	ENSG00000102879	0.628452	2.74678	6.43129e-11	6.04175e-10
GDPD3	protein_coding	ENSG00000102886	-0.732689	0.58941	5.55453e-05	0.000228123
PARD6A	protein_coding	ENSG00000102981	-0.686692	-0.410451	0.000502085	0.00169427
ZNF821	protein_coding	ENSG00000102984	-0.731195	2.59822	1.78507e-12	1.94556e-11
ESRP2	protein_coding	ENSG00000103067	1.38404	-1.17811	7.29539e-06	3.518e-05
MLYCD	protein_coding	ENSG00000103150	0.640136	1.14624	1.64233e-06	8.80848e-06
HSDL1	protein_coding	ENSG00000103160	-0.746811	5.23356	2.06841e-29	7.27324e-28
WFDC1	protein_coding	ENSG00000103175	1.63545	-2.31831	9.14329e-05	0.000360862
CRISPLD2	protein_coding	ENSG00000103196	1.44554	3.14112	1.54073e-56	1.52723e-54
SLC7A5	protein_coding	ENSG00000103257	0.826566	10.1024	5.00017e-35	2.29408e-33
RHBDL1	protein_coding	ENSG00000103269	-0.658036	1.2432	0.00973241	0.0239502
MEFV	protein_coding	ENSG00000103313	1.66394	-3.04628	0.00193114	0.00570182
GGA2	protein_coding	ENSG00000103365	-0.763293	5.67637	2.67028e-31	1.02094e-29
TOX3	protein_coding	ENSG00000103460	-1.34538	0.457591	4.79229e-14	6.07536e-13
IL21R	protein_coding	ENSG00000103522	-0.87518	1.31119	1.00497e-10	9.25604e-10
SYT17	protein_coding	ENSG00000103528	-0.926094	3.50155	4.3198e-27	1.3566e-25
CORO2B	protein_coding	ENSG00000103647	1.37892	5.48748	1.4551e-91	3.61331e-89
RASL12	protein_coding	ENSG00000103710	5.43439	-3.12199	1.25613e-12	1.38791e-11
ACSBG1	protein_coding	ENSG00000103740	3.88469	0.972671	1.01458e-74	1.74559e-72
IGDCC4	protein_coding	ENSG00000103742	0.816609	4.48556	6.46803e-29	2.22565e-27
GOLGA8UP	unprocessed_pseudogene	ENSG00000103832	1.10062	-0.506063	0.000539029	0.00180503
CEMIP	protein_coding	ENSG00000103888	3.09543	3.78517	2.02268e-259	6.09003e-256
EHD4	protein_coding	ENSG00000103966	0.60873	6.41463	4.98363e-20	1.02599e-18
CEP152	protein_coding	ENSG00000103995	-0.622913	5.10648	4.94266e-20	1.01842e-18
ATP8B4	protein_coding	ENSG00000104043	1.07682	0.670713	1.66422e-11	1.66264e-10
DTWD1	protein_coding	ENSG00000104047	-0.591276	3.78766	1.95933e-12	2.12683e-11
DMXL2	protein_coding	ENSG00000104093	-0.636791	4.81024	1.00213e-16	1.60815e-15
RHOV	protein_coding	ENSG00000104140	1.001	0.454708	3.64426e-08	2.47824e-07
EYA1	protein_coding	ENSG00000104313	-0.889961	1.81683	1.53276e-12	1.68045e-11
CALB1	protein_coding	ENSG00000104327	1.72455	-0.815962	2.62686e-09	2.07181e-08
NIPAL2	protein_coding	ENSG00000104361	0.920323	0.121331	8.69846e-07	4.86576e-06
STMN2	protein_coding	ENSG00000104435	0.670523	-0.730402	0.00667647	0.0171281
NCALD	protein_coding	ENSG00000104490	-0.810346	-1.57962	0.00431077	0.011621
UBXN8	protein_coding	ENSG00000104691	0.61491	3.32925	2.7575e-11	2.68364e-10
NEFM	protein_coding	ENSG00000104722	2.79197	-2.40528	1.74265e-07	1.07905e-06
RELB	protein_coding	ENSG00000104856	1.71433	4.67923	1.28785e-89	3.04121e-87
ARHGEF18	protein_coding	ENSG00000104880	1.09205	2.53507	7.51761e-24	1.99424e-22
DOT1L	protein_coding	ENSG00000104885	0.752039	6.36782	1.23748e-29	4.41587e-28
LYL1	protein_coding	ENSG00000104903	4.75833	-4.15616	0.0204286	0.0454521
TRMT1	protein_coding	ENSG00000104907	0.753076	5.34852	1.30609e-23	3.40475e-22
IL4I1	protein_coding	ENSG00000104951	3.19038	0.519807	3.10673e-47	2.20743e-45
NOVA2	protein_coding	ENSG00000104967	-0.965529	3.58522	6.59305e-24	1.76256e-22
LILRB1	protein_coding	ENSG00000104972	6.23682	-4.24041	0.000321749	0.0011337
IL27RA	protein_coding	ENSG00000104998	0.822382	5.69363	2.39238e-31	9.17601e-30
ZNF419	protein_coding	ENSG00000105136	-0.898716	3.03386	1.92624e-23	4.97827e-22
CCNE1	protein_coding	ENSG00000105173	-0.687686	6.31855	2.58828e-25	7.36924e-24
PRX	protein_coding	ENSG00000105227	-0.712526	2.8839	7.06261e-13	8.00551e-12
BBC3	protein_coding	ENSG00000105327	-1.47692	3.90106	2.65256e-60	2.98561e-58
ATP1A3	protein_coding	ENSG00000105409	0.754787	-0.627859	0.00175529	0.00523919
GRIN2D	protein_coding	ENSG00000105464	1.07514	0.861269	5.91481e-12	6.1622e-11
CCDC114	protein_coding	ENSG00000105479	-0.839026	-0.372977	1.65744e-05	7.49163e-05
CARD8	protein_coding	ENSG00000105483	-0.627681	4.45295	5.62135e-17	9.26138e-16
HAS1	protein_coding	ENSG00000105509	2.6379	-3.46708	3.26667e-05	0.000140157
RAB3D	protein_coding	ENSG00000105514	0.905503	-0.512708	0.000348428	0.00121835
DBP	protein_coding	ENSG00000105516	-1.09446	1.92358	3.42297e-19	6.68687e-18
FAM83E	protein_coding	ENSG00000105523	0.735765	0.634884	5.4313e-05	0.000223668
RASIP1	protein_coding	ENSG00000105538	0.732454	0.383433	3.18021e-05	0.00013674
THEG	protein_coding	ENSG00000105549	3.56519	-3.65582	0.00106308	0.00334245
FGF21	protein_coding	ENSG00000105550	-2.88351	1.23492	8.59769e-77	1.53402e-74
LENG1	protein_coding	ENSG00000105617	0.709346	3.12029	6.23768e-13	7.11729e-12
ETV2	protein_coding	ENSG00000105672	0.688686	0.244729	0.000138044	0.000525952
GAPDHS	protein_coding	ENSG00000105679	2.51744	-3.90841	0.00227112	0.00657665
SCN1B	protein_coding	ENSG00000105711	-0.623656	2.8599	7.70132e-11	7.18442e-10
GRIK5	protein_coding	ENSG00000105737	1.02173	0.0374904	1.06483e-06	5.89078e-06
CFAP69	protein_coding	ENSG00000105792	1.17859	0.943015	7.59085e-15	1.03769e-13
TFPI2	protein_coding	ENSG00000105825	3.58095	-0.372338	1.50494e-29	5.33864e-28
NAMPT	protein_coding	ENSG00000105835	0.953258	7.61118	7.36468e-37	3.67274e-35
PIK3CG	protein_coding	ENSG00000105851	1.06506	-1.07871	0.00237382	0.0068477
STEAP1B	protein_coding	ENSG00000105889	0.867745	-1.71004	0.00406634	0.0110436
ZC3HAV1	protein_coding	ENSG00000105939	-0.586682	5.93603	5.88183e-19	1.12799e-17
TFEC	protein_coding	ENSG00000105967	-1.89792	0.210747	2.87972e-25	8.17006e-24
MET	protein_coding	ENSG00000105976	0.613311	7.39979	1.65979e-20	3.54113e-19
HOXA1	protein_coding	ENSG00000105991	-0.609568	3.31609	7.7369e-12	7.96745e-11
HOXA3	protein_coding	ENSG00000105997	-0.946381	1.37853	1.66223e-13	2.0039e-12
LFNG	protein_coding	ENSG00000106003	1.01623	7.02716	1.2886e-47	9.26526e-46
HOXA5	protein_coding	ENSG00000106004	-1.98808	-0.575015	2.37545e-18	4.34123e-17
HOXA6	protein_coding	ENSG00000106006	-2.52463	-1.1788	2.41411e-19	4.76237e-18
HOXA13	protein_coding	ENSG00000106031	-1.86653	1.8264	3.86818e-59	4.14101e-57
COBL	protein_coding	ENSG00000106078	0.64363	5.28957	1.30111e-18	2.42569e-17
EPHB6	protein_coding	ENSG00000106123	0.630187	5.26054	2.23123e-18	4.08386e-17
SERPINE1	protein_coding	ENSG00000106366	0.647853	8.37412	5.07149e-24	1.36488e-22
GLCCI1	protein_coding	ENSG00000106415	-0.767813	2.15382	4.76201e-12	5.01541e-11
MYL10	protein_coding	ENSG00000106436	2.10142	0.545941	3.46707e-33	1.45999e-31
SFRP4	protein_coding	ENSG00000106483	-1.16714	0.59812	2.03215e-15	2.91359e-14
POU6F2	protein_coding	ENSG00000106536	-0.999578	1.23043	3.57286e-14	4.58739e-13
AHR	protein_coding	ENSG00000106546	-1.79569	-1.47301	2.59123e-11	2.52794e-10
GIMAP2	protein_coding	ENSG00000106560	-1.91494	-2.18722	2.30683e-07	1.40208e-06
GLI3	protein_coding	ENSG00000106571	-0.80253	5.52452	6.78169e-30	2.45271e-28
LIMK1	protein_coding	ENSG00000106683	0.774892	6.72693	7.60972e-34	3.25569e-32
LHX2	protein_coding	ENSG00000106689	-0.81034	-1.82693	0.0165256	0.0378988
ECM2	protein_coding	ENSG00000106823	-0.89564	0.561125	1.8305e-08	1.29775e-07
RIC1	protein_coding	ENSG00000107036	-0.606439	5.73378	7.40078e-19	1.40586e-17
ELAVL2	protein_coding	ENSG00000107105	-0.735823	3.78226	1.04172e-17	1.82353e-16
PIP5K1B	protein_coding	ENSG00000107242	-1.33281	0.0961039	1.95702e-14	2.58862e-13
GLIS3	protein_coding	ENSG00000107249	0.706448	0.0296841	0.000314264	0.0011096
RASSF4	protein_coding	ENSG00000107551	-0.681522	2.92264	2.19052e-14	2.88007e-13
DNMBP	protein_coding	ENSG00000107554	1.26087	7.29293	1.99497e-71	3.29128e-69
CXCL12	protein_coding	ENSG00000107562	-1.00227	-0.641086	9.39901e-07	5.23333e-06
CUBN	protein_coding	ENSG00000107611	1.28949	2.33334	5.34972e-30	1.94995e-28
SPOCK2	protein_coding	ENSG00000107742	-0.603427	0.354208	0.00368272	0.0101181
TLX1	protein_coding	ENSG00000107807	-1.1572	0.267706	1.21129e-10	1.10189e-09
TWNK	protein_coding	ENSG00000107815	0.863449	6.04243	7.25687e-37	3.62648e-35
GTPBP4	protein_coding	ENSG00000107937	0.691144	5.88156	4.50963e-22	1.06598e-20
NEURL1	protein_coding	ENSG00000107954	0.912948	0.107229	1.40579e-06	7.62816e-06
MAP3K8	protein_coding	ENSG00000107968	-0.645327	2.63822	1.61177e-11	1.61157e-10
DKK1	protein_coding	ENSG00000107984	5.54811	0.807581	4.01021e-96	1.07327e-93
EBF3	protein_coding	ENSG00000108001	0.741705	3.14706	1.29339e-13	1.57343e-12
PPIF	protein_coding	ENSG00000108179	0.720181	7.5974	7.58501e-27	2.35438e-25
TBC1D12	protein_coding	ENSG00000108239	-0.979839	4.05886	5.91402e-35	2.70819e-33
KRT23	protein_coding	ENSG00000108244	5.23186	0.809854	6.7791e-112	2.4013e-109
CSF3	protein_coding	ENSG00000108342	7.35371	-3.69482	1.9322e-07	1.18909e-06
2019-09-04	protein_coding	ENSG00000108387	-0.61442	-0.20494	0.000991435	0.0031422
MTMR4	protein_coding	ENSG00000108389	-0.685076	6.55893	5.1609e-25	1.45053e-23
P2RX1	protein_coding	ENSG00000108405	1.26405	-1.32349	2.66778e-06	1.38578e-05
RASD1	protein_coding	ENSG00000108551	2.36408	-2.83069	4.19641e-05	0.000175942
RAI1	protein_coding	ENSG00000108557	0.6149	6.25572	3.60096e-21	8.05352e-20
SLC6A4	protein_coding	ENSG00000108576	1.78134	-1.46078	1.50408e-06	8.11395e-06
MED31	protein_coding	ENSG00000108590	-0.638234	2.45815	8.22819e-10	6.87452e-09
ASIC2	protein_coding	ENSG00000108684	-0.657035	0.385378	6.81608e-05	0.000275792
CCL7	protein_coding	ENSG00000108688	2.6461	-1.45087	4.25744e-15	5.93455e-14
CCL2	protein_coding	ENSG00000108691	2.66166	5.02625	1.36276e-34	6.08993e-33
EZH1	protein_coding	ENSG00000108799	-0.885598	3.7867	1.07287e-27	3.49219e-26
SGCA	protein_coding	ENSG00000108823	-0.85393	-2.5545	0.0208882	0.0463292
ABCC3	protein_coding	ENSG00000108846	0.725789	5.26579	5.2745e-20	1.08494e-18
SLC16A6	protein_coding	ENSG00000108932	2.86326	0.802409	2.29898e-39	1.24439e-37
EFNB3	protein_coding	ENSG00000108947	0.916949	4.29975	2.61619e-34	1.14784e-32
MYH3	protein_coding	ENSG00000109063	0.752194	1.93124	5.57882e-09	4.23368e-08
VTN	protein_coding	ENSG00000109072	2.27329	-4.23815	0.0148676	0.0345839
UNC119	protein_coding	ENSG00000109103	-0.949883	5.59005	3.2474e-47	2.30059e-45
KIAA1211	protein_coding	ENSG00000109265	-0.756449	3.46358	2.03046e-18	3.73341e-17
NFKB1	protein_coding	ENSG00000109320	1.19662	6.43126	8.88469e-53	7.67045e-51
AREG	protein_coding	ENSG00000109321	2.31406	5.79866	1.81602e-42	1.0695e-40
TBC1D9	protein_coding	ENSG00000109436	-0.910888	4.64062	1.13012e-33	4.8179e-32
GAB1	protein_coding	ENSG00000109458	-0.74916	3.08082	1.58834e-15	2.30194e-14
WFS1	protein_coding	ENSG00000109501	-0.594425	5.79564	1.88599e-18	3.4784e-17
ANXA10	protein_coding	ENSG00000109511	0.60147	0.190516	0.00256977	0.00736006
TRIM2	protein_coding	ENSG00000109654	-0.694004	2.95462	2.5429e-12	2.73686e-11
NEIL3	protein_coding	ENSG00000109674	-0.598904	3.51629	1.30034e-12	1.43347e-11
TBC1D19	protein_coding	ENSG00000109680	-0.871042	1.20222	1.03637e-09	8.53145e-09
GLRB	protein_coding	ENSG00000109738	-0.659746	3.65663	4.91591e-17	8.13811e-16
HGFAC	protein_coding	ENSG00000109758	-0.69126	0.365934	4.25163e-05	0.000178074
KLF3	protein_coding	ENSG00000109787	-0.846863	5.36978	6.05644e-32	2.40332e-30
UGDH	protein_coding	ENSG00000109814	0.619212	5.98536	4.84234e-20	9.98608e-19
DBX1	protein_coding	ENSG00000109851	2.91233	-3.55277	0.000494354	0.00166992
JHY	protein_coding	ENSG00000109944	-0.728152	0.974224	5.34755e-07	3.09037e-06
B3GAT1	protein_coding	ENSG00000109956	0.622219	3.32274	2.57133e-13	3.04053e-12
EHD1	protein_coding	ENSG00000110047	1.03636	7.0741	3.96254e-52	3.33726e-50
TRIM3	protein_coding	ENSG00000110171	-0.784078	4.36882	1.04291e-25	3.03158e-24
ARHGEF17	protein_coding	ENSG00000110237	-0.585789	6.28615	4.61765e-17	7.67601e-16
IL10RA	protein_coding	ENSG00000110324	-1.14781	-2.64171	0.009754	0.0239935
ELMOD1	protein_coding	ENSG00000110675	-0.758755	1.70212	1.38841e-10	1.25677e-09
SOX6	protein_coding	ENSG00000110693	-0.698463	1.81884	5.9038e-09	4.45923e-08
CHKA	protein_coding	ENSG00000110721	-0.614961	4.62592	1.18283e-15	1.73724e-14
POU2AF1	protein_coding	ENSG00000110777	1.29143	-1.09743	3.29881e-05	0.000141381
PPFIBP1	protein_coding	ENSG00000110841	0.815994	6.90764	2.73403e-37	1.38934e-35
CD69	protein_coding	ENSG00000110848	5.31372	-3.96735	0.00338499	0.00939986
MVK	protein_coding	ENSG00000110921	-0.79341	4.8013	1.31809e-27	4.27882e-26
IL23A	protein_coding	ENSG00000110944	2.03051	-0.356254	3.62558e-15	5.0832e-14
KRT18	protein_coding	ENSG00000111057	0.703982	8.64979	2.88821e-26	8.68519e-25
SLC6A12	protein_coding	ENSG00000111181	-0.76213	0.128291	2.02453e-05	9.00387e-05
SH2B3	protein_coding	ENSG00000111252	1.37733	7.10087	3.12661e-92	8.01177e-90
KCNA1	protein_coding	ENSG00000111262	0.704676	3.72041	7.89586e-15	1.07816e-13
DUSP16	protein_coding	ENSG00000111266	-0.593001	5.42446	2.09541e-16	3.26681e-15
FZD10	protein_coding	ENSG00000111432	1.67882	-2.81759	0.0064708	0.0166591
IFNG	protein_coding	ENSG00000111537	5.31413	-3.18564	2.74939e-10	2.40992e-09
MDM1	protein_coding	ENSG00000111554	-0.627979	3.28956	6.58984e-12	6.83001e-11
NOP2	protein_coding	ENSG00000111641	0.795058	1.50585	9.22574e-07	5.14638e-06
PTPN6	protein_coding	ENSG00000111679	1.6641	-1.70684	5.16505e-05	0.000213544
ST8SIA1	protein_coding	ENSG00000111728	-0.792997	-0.47566	0.000136972	0.000522198
BTN3A3	protein_coding	ENSG00000111801	-0.865222	0.75444	3.02734e-09	2.36906e-08
FRK	protein_coding	ENSG00000111816	-1.22871	-0.499337	2.74043e-08	1.89517e-07
RSPH4A	protein_coding	ENSG00000111834	1.00091	-1.21536	0.000828032	0.00266357
NEDD9	protein_coding	ENSG00000111859	0.791723	5.48476	4.3443e-31	1.65049e-29
ADTRP	protein_coding	ENSG00000111863	1.01066	2.23844	2.14343e-20	4.53281e-19
FAM184A	protein_coding	ENSG00000111879	-1.56079	-0.431175	1.30626e-11	1.31869e-10
GABRR2	protein_coding	ENSG00000111886	-1.31466	-1.9312	4.48461e-05	0.000187243
NCOA7	protein_coding	ENSG00000111912	-0.797712	4.85578	1.20979e-28	4.0985e-27
PPARD	protein_coding	ENSG00000112033	0.982433	6.04147	1.08337e-47	7.83638e-46
MDGA1	protein_coding	ENSG00000112139	1.93372	3.77397	1.40128e-117	5.35755e-115
CD83	protein_coding	ENSG00000112149	1.41567	4.05382	5.1882e-66	7.2236e-64
RBM24	protein_coding	ENSG00000112183	0.610227	4.44591	1.72496e-14	2.29427e-13
TREML2	protein_coding	ENSG00000112195	1.15274	-1.15462	3.94831e-05	0.000166555
CRYBG1	protein_coding	ENSG00000112297	0.703274	1.79486	3.07384e-08	2.1118e-07
VNN1	protein_coding	ENSG00000112299	2.28149	-0.364256	4.31623e-16	6.5759e-15
ADGRG6	protein_coding	ENSG00000112414	0.870849	5.14132	6.9165e-35	3.14335e-33
SLC22A2	protein_coding	ENSG00000112499	2.65298	-3.28563	4.86363e-05	0.000201948
LAMA4	protein_coding	ENSG00000112769	1.15447	0.589707	3.15374e-11	3.05568e-10
PRSS16	protein_coding	ENSG00000112812	-0.671315	1.11437	8.04364e-07	4.53715e-06
MEP1A	protein_coding	ENSG00000112818	1.89512	-3.65487	0.0057332	0.014973
SEMA5A	protein_coding	ENSG00000112902	-0.703073	0.421605	5.58877e-05	0.000229291
GHR	protein_coding	ENSG00000112964	-0.765459	2.74444	7.47099e-16	1.11357e-14
HMGCS1	protein_coding	ENSG00000112972	0.995139	8.92736	9.39395e-40	5.15426e-38
HBEGF	protein_coding	ENSG00000113070	1.36677	6.81763	1.8826e-34	8.3357e-33
PDE8B	protein_coding	ENSG00000113231	1.20642	-2.77142	0.0169897	0.0388155
PCDHB15	protein_coding	ENSG00000113248	-0.763647	-0.0464829	6.47965e-05	0.000263063
ITK	protein_coding	ENSG00000113263	0.610942	1.19219	0.000153921	0.000580838
BTNL8	protein_coding	ENSG00000113303	0.983555	-1.21589	0.000328203	0.00115458
NPR3	protein_coding	ENSG00000113389	2.52594	-0.530191	2.65911e-19	5.23284e-18
PDE4D	protein_coding	ENSG00000113448	2.00005	1.36971	4.75151e-40	2.63709e-38
PCDH12	protein_coding	ENSG00000113555	1.15008	-2.0355	0.00221339	0.00642415
FGF1	protein_coding	ENSG00000113578	1.18587	6.69079	3.14598e-55	3.00703e-53
NR3C1	protein_coding	ENSG00000113580	1.2641	7.13845	4.761e-78	8.95924e-76
WWC1	protein_coding	ENSG00000113645	0.611628	6.70556	2.4682e-19	4.8651e-18
PDGFRB	protein_coding	ENSG00000113721	0.889551	6.07956	1.46581e-42	8.67491e-41
CPEB4	protein_coding	ENSG00000113742	0.910216	5.45364	7.17745e-34	3.07622e-32
UNC5A	protein_coding	ENSG00000113763	1.61493	1.15584	9.78265e-23	2.42922e-21
EHHADH	protein_coding	ENSG00000113790	-0.896978	2.79423	3.26371e-20	6.81735e-19
HRG	protein_coding	ENSG00000113905	1.17581	-0.919332	2.53913e-06	1.32152e-05
BCL6	protein_coding	ENSG00000113916	-0.847119	4.05335	8.24408e-25	2.29037e-23
PFKFB4	protein_coding	ENSG00000114268	0.920692	4.37812	2.07039e-35	9.64595e-34
HYAL1	protein_coding	ENSG00000114378	0.612988	-0.288951	0.00287205	0.00812436
IQCG	protein_coding	ENSG00000114473	0.82265	3.41796	7.55131e-17	1.22155e-15
C3orf52	protein_coding	ENSG00000114529	1.22782	4.59928	6.61276e-54	5.9656e-52
PLSCR4	protein_coding	ENSG00000114698	-1.24495	1.71399	2.35206e-27	7.49393e-26
RRP9	protein_coding	ENSG00000114767	0.707251	6.04266	1.55693e-22	3.79573e-21
AADAC	protein_coding	ENSG00000114771	2.7102	0.612242	2.90082e-41	1.64405e-39
KLHL24	protein_coding	ENSG00000114796	-0.925219	3.07575	7.81705e-17	1.26284e-15
DNAH1	protein_coding	ENSG00000114841	1.43169	1.66727	8.96787e-22	2.07302e-20
FOXP1	protein_coding	ENSG00000114861	0.678621	3.14391	1.73753e-14	2.30971e-13
RTKN	protein_coding	ENSG00000114993	0.657116	4.51063	7.19943e-17	1.17013e-15
CCL20	protein_coding	ENSG00000115009	4.68313	4.56413	5.33565e-53	4.6397e-51
ITGB6	protein_coding	ENSG00000115221	1.70804	-1.85001	6.1063e-07	3.50029e-06
IFIH1	protein_coding	ENSG00000115267	-1.0074	1.42377	2.41436e-16	3.73986e-15
LOXL3	protein_coding	ENSG00000115318	0.875598	3.79943	6.59535e-27	2.05248e-25
FANCL	protein_coding	ENSG00000115392	-0.64951	4.48622	4.76484e-19	9.18166e-18
FN1	protein_coding	ENSG00000115414	0.680445	10.7255	5.01539e-22	1.17974e-20
ELMOD3	protein_coding	ENSG00000115459	-0.633037	4.11478	1.863e-16	2.91768e-15
MOB4	protein_coding	ENSG00000115540	0.69755	3.70186	7.24618e-16	1.08073e-14
IL1R2	protein_coding	ENSG00000115590	0.90881	-1.40355	0.00348847	0.00965937
SMYD1	protein_coding	ENSG00000115593	2.27794	-3.54036	0.00211412	0.00617994
IL1RL1	protein_coding	ENSG00000115602	3.49433	-0.794422	1.53164e-22	3.73786e-21
IL18R1	protein_coding	ENSG00000115604	0.745685	1.3173	2.52102e-08	1.75249e-07
SLC9A2	protein_coding	ENSG00000115616	0.784746	2.20898	3.37577e-10	2.93334e-09
MLPH	protein_coding	ENSG00000115648	1.17534	1.8652	5.23408e-22	1.22879e-20
SLC5A7	protein_coding	ENSG00000115665	3.84405	-4.09093	0.000104549	0.000408478
TPO	protein_coding	ENSG00000115705	1.68865	-0.870186	8.06658e-09	6.00617e-08
ID2	protein_coding	ENSG00000115738	0.981682	3.22793	5.22581e-25	1.46706e-23
HPCAL1	protein_coding	ENSG00000115756	0.892926	5.56303	1.9375e-38	1.02343e-36
ODC1	protein_coding	ENSG00000115758	1.05196	9.36637	3.12042e-45	2.05922e-43
SLC25A12	protein_coding	ENSG00000115840	-0.614531	3.96406	8.39614e-15	1.14453e-13
LCT	protein_coding	ENSG00000115850	1.0478	-1.61895	0.00149869	0.00454648
SLC1A4	protein_coding	ENSG00000115902	-0.676128	6.11081	2.1629e-26	6.52853e-25
PLEK	protein_coding	ENSG00000115956	2.41385	-2.12504	1.11507e-09	9.13559e-09
RND3	protein_coding	ENSG00000115963	1.22407	7.2936	9.97259e-28	3.25488e-26
ARID3A	protein_coding	ENSG00000116017	-0.955638	3.65562	1.81636e-30	6.75166e-29
CD207	protein_coding	ENSG00000116031	-0.763315	-1.21017	0.00138784	0.00424872
VAX2	protein_coding	ENSG00000116035	-0.652073	-1.14525	0.00874258	0.0217859
EPHA4	protein_coding	ENSG00000116106	1.50697	5.60591	5.59335e-97	1.54859e-94
TCEANC2	protein_coding	ENSG00000116205	-1.23251	3.44208	2.05068e-46	1.41939e-44
WRAP73	protein_coding	ENSG00000116213	-0.874291	3.9192	6.38868e-27	1.99074e-25
ERRFI1	protein_coding	ENSG00000116285	1.48526	7.07569	1.60769e-14	2.14184e-13
OPRD1	protein_coding	ENSG00000116329	1.99268	1.79509	1.2567e-54	1.17783e-52
RNF19B	protein_coding	ENSG00000116514	-0.85244	4.54735	4.65043e-32	1.85763e-30
RHOU	protein_coding	ENSG00000116574	-0.723229	2.12678	6.2223e-12	6.46856e-11
DLEU2L	sense_intronic	ENSG00000116652	-0.846203	-1.53708	0.00474191	0.0126586
FBXO6	protein_coding	ENSG00000116663	-1.36669	-1.69186	2.82162e-05	0.000122458
RGS2	protein_coding	ENSG00000116741	2.59562	4.05444	7.35489e-28	2.41688e-26
CFHR3	protein_coding	ENSG00000116785	-1.2326	-1.42201	5.11022e-06	2.52959e-05
RRAGC	protein_coding	ENSG00000116954	-1.06453	2.90212	2.56909e-28	8.57087e-27
MYCL	protein_coding	ENSG00000116990	-1.16242	1.00987	2.37648e-14	3.10772e-13
SIPA1L2	protein_coding	ENSG00000116991	1.40786	-3.25628	0.0201393	0.0449412
KCNQ4	protein_coding	ENSG00000117013	0.588648	-0.168198	0.0106842	0.0259582
RIMS3	protein_coding	ENSG00000117016	-0.805336	3.40861	3.98765e-20	8.26597e-19
ACTL8	protein_coding	ENSG00000117148	1.54995	-0.942717	3.20685e-07	1.91197e-06
RGS4	protein_coding	ENSG00000117152	3.44835	5.76931	7.60191e-48	5.53194e-46
PLA2G2D	protein_coding	ENSG00000117215	6.14937	-4.08746	0.000387623	0.00134071
GBP1	protein_coding	ENSG00000117228	0.832108	2.34219	4.30606e-15	5.99538e-14
ID3	protein_coding	ENSG00000117318	1.31134	5.46073	2.04713e-54	1.88924e-52
SLC2A1	protein_coding	ENSG00000117394	0.867938	7.48373	4.74745e-42	2.74884e-40
MPL	protein_coding	ENSG00000117400	0.950074	-2.23468	0.00785889	0.0198175
PIK3R3	protein_coding	ENSG00000117461	-1.27003	3.43389	2.60095e-43	1.58605e-41
F3	protein_coding	ENSG00000117525	2.45423	4.9238	2.77023e-88	6.3549e-86
FASLG	protein_coding	ENSG00000117560	5.2458	-2.82286	4.72513e-10	4.03739e-09
IRF6	protein_coding	ENSG00000117595	0.944558	-1.18259	0.000473354	0.00160384
UTP25	protein_coding	ENSG00000117597	1.30521	6.49319	5.0326e-71	8.08135e-69
PLPPR4	protein_coding	ENSG00000117600	-0.624897	0.0963111	0.000255231	0.000919497
RSRP1	protein_coding	ENSG00000117616	-0.915008	5.98643	3.33167e-39	1.79932e-37
SLC5A9	protein_coding	ENSG00000117834	2.45044	-0.755808	6.90719e-17	1.12643e-15
CD3EAP	protein_coding	ENSG00000117877	0.866943	6.93173	4.41902e-37	2.2268e-35
SLC8A2	protein_coding	ENSG00000118160	0.717409	3.96711	4.82113e-17	7.9977e-16
FILIP1	protein_coding	ENSG00000118407	-2.25217	-1.65182	1.09872e-14	1.48346e-13
UBE3D	protein_coding	ENSG00000118420	-0.595164	1.84138	5.63475e-07	3.24544e-06
TNFAIP3	protein_coding	ENSG00000118503	1.98388	5.23632	1.25499e-23	3.27506e-22
ALDH8A1	protein_coding	ENSG00000118514	0.771714	0.150077	0.00016552	0.000621298
SGK1	protein_coding	ENSG00000118515	1.10263	4.915	4.73347e-42	2.74735e-40
CTGF	protein_coding	ENSG00000118523	0.661334	8.91476	8.40757e-15	1.14544e-13
ZNF430	protein_coding	ENSG00000118620	-0.779965	2.3909	3.71353e-13	4.32742e-12
KLF12	protein_coding	ENSG00000118922	0.983175	4.92578	8.04266e-42	4.62348e-40
PCDH17	protein_coding	ENSG00000118946	-1.19371	2.34967	3.84531e-30	1.40763e-28
WDR35	protein_coding	ENSG00000118965	1.14048	5.15677	6.35499e-56	6.1229e-54
CCND2	protein_coding	ENSG00000118971	-1.2191	6.6326	3.38209e-65	4.47607e-63
ELL2	protein_coding	ENSG00000118985	1.49749	7.12191	4.11014e-68	6.03665e-66
C1orf198	protein_coding	ENSG00000119280	-0.817657	5.41659	1.86851e-34	8.28855e-33
NR4A3	protein_coding	ENSG00000119508	1.58592	3.75784	4.97077e-13	5.72086e-12
INVS	protein_coding	ENSG00000119509	-0.696876	3.64273	5.71974e-17	9.40419e-16
DCAF4	protein_coding	ENSG00000119599	0.643311	5.38902	8.33362e-21	1.8133e-19
ACYP1	protein_coding	ENSG00000119640	-0.643953	3.34369	5.70735e-15	7.88714e-14
LTBP2	protein_coding	ENSG00000119681	0.589941	8.2525	6.68381e-20	1.36435e-18
FLVCR2	protein_coding	ENSG00000119686	-1.06057	0.508224	6.13234e-11	5.77442e-10
TGFB3	protein_coding	ENSG00000119699	-1.04538	2.82308	7.64168e-25	2.13038e-23
GPR68	protein_coding	ENSG00000119714	3.69162	-4.09187	0.000444819	0.00151804
LGALSL	protein_coding	ENSG00000119862	-0.95862	3.99524	1.94155e-35	9.06319e-34
SLC17A5	protein_coding	ENSG00000119899	-0.726015	2.76351	1.77331e-14	2.35337e-13
IFIT2	protein_coding	ENSG00000119922	-1.34966	-0.398104	2.46537e-12	2.65579e-11
PPP1R3C	protein_coding	ENSG00000119938	1.44588	4.00383	5.06751e-59	5.37715e-57
PYROXD2	protein_coding	ENSG00000119943	-0.729993	2.73449	5.2883e-13	6.07146e-12
CNNM1	protein_coding	ENSG00000119946	-0.590342	0.356443	0.000544142	0.00182013
C10orf88	protein_coding	ENSG00000119965	-0.905436	3.3466	1.14106e-24	3.1447e-23
MOB3B	protein_coding	ENSG00000120162	-0.698108	5.22005	7.37022e-24	1.95729e-22
INSL4	protein_coding	ENSG00000120211	2.41796	2.25713	8.95799e-85	1.94388e-82
CD274	protein_coding	ENSG00000120217	1.4252	4.64868	1.03061e-54	9.73499e-53
GRIA2	protein_coding	ENSG00000120251	-1.10337	-2.8632	0.00795438	0.0200493
LRP11	protein_coding	ENSG00000120256	-0.683492	1.84268	4.06427e-07	2.39063e-06
PLEKHG1	protein_coding	ENSG00000120278	-0.794897	2.39284	2.01676e-11	1.99908e-10
MYCT1	protein_coding	ENSG00000120279	4.45412	4.22686	0	0
KCNJ5	protein_coding	ENSG00000120457	0.665878	-0.836272	0.0118408	0.0283679
KIAA1217	protein_coding	ENSG00000120549	-0.610101	5.61637	1.5304e-18	2.83996e-17
IQSEC3	protein_coding	ENSG00000120645	1.27949	-1.09937	1.82144e-06	9.71618e-06
CCDC77	protein_coding	ENSG00000120647	-0.78737	4.89384	9.10288e-27	2.81465e-25
ENOX1	protein_coding	ENSG00000120658	-0.768865	-0.117165	0.000170371	0.000637719
MTRF1	protein_coding	ENSG00000120662	-0.673034	2.64058	1.73741e-10	1.55284e-09
TGFBI	protein_coding	ENSG00000120708	0.784004	7.16294	4.22356e-34	1.82973e-32
FAM53C	protein_coding	ENSG00000120709	-0.617004	5.97394	2.31763e-21	5.24176e-20
EGR1	protein_coding	ENSG00000120738	-0.835842	6.03727	3.22713e-08	2.21081e-07
MTERF2	protein_coding	ENSG00000120832	-1.07827	2.50442	4.24508e-26	1.2577e-24
SOCS2	protein_coding	ENSG00000120833	0.621336	1.10651	4.14619e-05	0.00017411
APAF1	protein_coding	ENSG00000120868	-1.03119	4.65515	5.89301e-43	3.53097e-41
DUSP4	protein_coding	ENSG00000120875	2.98984	-1.87178	4.3965e-11	4.17746e-10
ADRA1A	protein_coding	ENSG00000120907	-0.762783	-1.29322	0.00398294	0.010844
UBIAD1	protein_coding	ENSG00000120942	0.647484	5.47936	3.07272e-22	7.34253e-21
TNFRSF8	protein_coding	ENSG00000120949	1.44	2.94412	3.01899e-50	2.39995e-48
RDH10	protein_coding	ENSG00000121039	1.09532	5.13605	2.52823e-54	2.31549e-52
TBX2	protein_coding	ENSG00000121068	-2.16816	-3.72144	0.00235056	0.00678629
TBX4	protein_coding	ENSG00000121075	-1.13349	-0.290386	8.23513e-09	6.11655e-08
FAM117A	protein_coding	ENSG00000121104	-0.697505	2.89633	6.45744e-12	6.70433e-11
LRAT	protein_coding	ENSG00000121207	5.36576	-3.94671	0.0027908	0.00792245
TAS2R10	protein_coding	ENSG00000121318	-2.21388	-2.69703	9.15739e-07	5.10943e-06
ZSCAN18	protein_coding	ENSG00000121413	-0.649981	4.18672	2.12738e-17	3.6332e-16
LHX4	protein_coding	ENSG00000121454	-1.25507	0.980058	8.29774e-16	1.23375e-14
POPDC2	protein_coding	ENSG00000121577	1.13317	-1.56717	0.000418802	0.00143556
CRY2	protein_coding	ENSG00000121671	-0.678887	3.91625	2.09278e-18	3.83921e-17
DEPDC7	protein_coding	ENSG00000121690	-0.829487	3.54298	1.93442e-22	4.70175e-21
FABP3	protein_coding	ENSG00000121769	2.48814	-2.3885	2.29388e-07	1.39456e-06
CCRL2	protein_coding	ENSG00000121797	2.17022	0.646093	3.73118e-34	1.62226e-32
SLITRK3	protein_coding	ENSG00000121871	-0.605789	-0.494788	0.00484626	0.0129057
TMEM156	protein_coding	ENSG00000121895	1.02152	0.769796	3.40393e-11	3.28488e-10
LRIF1	protein_coding	ENSG00000121931	-0.917627	-2.4669	0.0161712	0.0372244
SV2C	protein_coding	ENSG00000122012	0.762958	-1.51832	0.0116419	0.0279663
UBL3	protein_coding	ENSG00000122042	0.589297	5.19992	1.35742e-15	1.97919e-14
PAEP	protein_coding	ENSG00000122133	1.41851	0.418346	1.14843e-17	2.00451e-16
SERAC1	protein_coding	ENSG00000122335	-0.636577	3.57803	2.72241e-14	3.52932e-13
SPATA1	protein_coding	ENSG00000122432	-0.675442	-1.42154	0.0107131	0.0260207
FAM126A	protein_coding	ENSG00000122591	0.592691	6.61901	1.2273e-18	2.29341e-17
HOXA7	protein_coding	ENSG00000122592	-1.3451	2.84383	1.7148e-42	1.01236e-40
INHBA	protein_coding	ENSG00000122641	0.789389	8.352	8.62764e-32	3.38459e-30
SLC25A51	protein_coding	ENSG00000122696	-0.637447	3.95525	7.0415e-16	1.05086e-14
TAF1L	protein_coding	ENSG00000122728	2.76917	-3.65754	0.00030496	0.00107991
PLAU	protein_coding	ENSG00000122861	1.74971	7.1957	9.45763e-122	3.9966e-119
CDKN2C	protein_coding	ENSG00000123080	-0.668015	5.35676	3.60939e-22	8.58236e-21
NECAB1	protein_coding	ENSG00000123119	0.683691	-0.356405	0.00037426	0.00129952
CCDC70	protein_coding	ENSG00000123171	3.88163	-3.95522	9.76284e-05	0.000383242
GUCY1B2	transcribed_unitary_pseudogene	ENSG00000123201	-0.859318	-0.607945	2.69001e-05	0.000117042
ARHGAP9	protein_coding	ENSG00000123329	0.804271	-0.244133	8.26818e-05	0.000329783
NR4A1	protein_coding	ENSG00000123358	1.58274	5.84591	4.29358e-17	7.17195e-16
IKZF4	protein_coding	ENSG00000123411	0.714195	4.13447	2.00586e-19	3.97001e-18
AMD1	protein_coding	ENSG00000123505	0.727373	6.8502	3.97926e-26	1.18478e-24
RAB9A	protein_coding	ENSG00000123595	-0.794865	3.19588	1.03508e-16	1.65993e-15
TNFAIP6	protein_coding	ENSG00000123610	0.788838	0.772291	5.83908e-06	2.8639e-05
G0S2	protein_coding	ENSG00000123689	2.23969	2.35561	1.85096e-30	6.85907e-29
KCNJ2	protein_coding	ENSG00000123700	-2.23011	-1.2374	7.36078e-17	1.19313e-15
AGO2	protein_coding	ENSG00000123908	0.77351	8.31732	4.25255e-33	1.78451e-31
DAW1	protein_coding	ENSG00000123977	1.7646	2.30903	6.281e-51	5.09395e-49
ARHGAP40	protein_coding	ENSG00000124143	1.10934	-0.309305	7.1291e-08	4.66753e-07
SDC4	protein_coding	ENSG00000124145	1.33568	8.59503	9.15749e-84	1.952e-81
PTGIS	protein_coding	ENSG00000124212	1.17167	2.7419	5.91733e-31	2.23753e-29
SNAI1	protein_coding	ENSG00000124216	0.772806	4.03942	6.60258e-20	1.34891e-18
MOCS3	protein_coding	ENSG00000124217	1.00367	4.04452	1.52668e-36	7.45907e-35
PPP4R1L	transcribed_unprocessed_pseudogene	ENSG00000124224	0.757459	4.145	3.39205e-23	8.63682e-22
PMEPA1	protein_coding	ENSG00000124225	0.640556	8.24753	5.88082e-24	1.5739e-22
CHST8	protein_coding	ENSG00000124302	0.895081	0.460428	1.47301e-06	7.95527e-06
NDP	protein_coding	ENSG00000124479	2.38732	-2.85405	5.67776e-06	2.78818e-05
BTN2A2	protein_coding	ENSG00000124508	0.702602	3.73462	8.4155e-17	1.35497e-15
AL365205.1	protein_coding	ENSG00000124593	-0.586748	-0.207878	0.0025251	0.00725021
HIST1H2BJ	protein_coding	ENSG00000124635	2.15075	4.90434	6.00644e-146	3.52871e-143
MED20	protein_coding	ENSG00000124641	-1.15535	5.05882	2.68566e-63	3.26714e-61
SPDEF	protein_coding	ENSG00000124664	2.23647	-0.178371	8.64403e-23	2.15092e-21
DNAH8	protein_coding	ENSG00000124721	2.25673	-3.04118	0.00103986	0.00327676
CDKN1A	protein_coding	ENSG00000124762	-0.610075	7.78229	9.82914e-21	2.12909e-19
RAB17	protein_coding	ENSG00000124839	1.36239	0.219832	1.09112e-13	1.33954e-12
CXCL6	protein_coding	ENSG00000124875	6.29896	-3.70872	0.000128067	0.000491353
EREG	protein_coding	ENSG00000124882	3.84472	3.61589	4.96382e-60	5.50984e-58
WNT1	protein_coding	ENSG00000125084	3.04568	-2.13714	4.9566e-13	5.70969e-12
SH3TC1	protein_coding	ENSG00000125089	0.976873	4.35971	2.16182e-37	1.10088e-35
MT2A	protein_coding	ENSG00000125148	0.744809	8.64993	2.45617e-31	9.4057e-30
IRF1	protein_coding	ENSG00000125347	0.633507	4.35515	1.64287e-15	2.37526e-14
BMP4	protein_coding	ENSG00000125378	-0.830154	5.54683	8.35702e-13	9.42836e-12
SLC25A35	protein_coding	ENSG00000125434	-0.775445	0.743567	2.6514e-06	1.37787e-05
ARMC7	protein_coding	ENSG00000125449	-0.764732	3.51039	2.3099e-18	4.22465e-17
C1orf61	protein_coding	ENSG00000125462	1.92976	-0.375084	2.16671e-15	3.09642e-14
SRMS	protein_coding	ENSG00000125508	2.20856	-3.51211	0.00208818	0.0061145
BHLHE23	protein_coding	ENSG00000125533	-1.03279	-2.06369	0.00271931	0.00773499
IL1B	protein_coding	ENSG00000125538	3.10042	-1.47389	5.58634e-12	5.83767e-11
PAX8	protein_coding	ENSG00000125618	2.19698	1.10337	1.64346e-39	8.95613e-38
HTR5BP	transcribed_unprocessed_pseudogene	ENSG00000125631	-1.05394	-2.96632	0.0143066	0.0334307
PSD4	protein_coding	ENSG00000125637	1.46035	3.55257	3.49748e-62	4.14994e-60
SH2D3A	protein_coding	ENSG00000125731	1.89373	-2.71492	8.29337e-05	0.000330568
TNFSF14	protein_coding	ENSG00000125735	2.51355	-0.57905	3.21372e-23	8.2001e-22
FOSB	protein_coding	ENSG00000125740	1.46754	4.12598	1.44798e-10	1.30725e-09
VASP	protein_coding	ENSG00000125753	0.847161	7.28385	1.15281e-35	5.44463e-34
GPCPD1	protein_coding	ENSG00000125772	1.36036	3.89232	4.88269e-59	5.20396e-57
GNRH2	protein_coding	ENSG00000125787	-0.912569	-1.87996	0.0179202	0.0406215
CD93	protein_coding	ENSG00000125810	1.35264	-2.81715	0.0210019	0.0465426
BMP2	protein_coding	ENSG00000125845	0.825258	3.45863	5.30536e-20	1.08943e-18
FLRT3	protein_coding	ENSG00000125848	-1.24651	2.86648	2.48393e-38	1.3035e-36
OVOL2	protein_coding	ENSG00000125850	0.881931	-0.23258	2.4265e-06	1.26646e-05
S1PR4	protein_coding	ENSG00000125910	-0.732377	-0.98242	0.00145981	0.00444194
GDF5	protein_coding	ENSG00000125965	-1.15078	-3.27874	0.0161075	0.0370919
ID1	protein_coding	ENSG00000125968	0.838893	6.47461	5.83332e-32	2.32243e-30
GRPR	protein_coding	ENSG00000126010	2.03614	-1.9446	4.51565e-06	2.25801e-05
AMOT	protein_coding	ENSG00000126016	-1.17875	4.67464	8.7635e-58	8.9824e-56
IGFLR1	protein_coding	ENSG00000126246	-1.12358	-2.22154	0.00127592	0.00393609
THRA	protein_coding	ENSG00000126351	-0.683127	4.93525	6.0878e-22	1.4209e-20
CCR7	protein_coding	ENSG00000126353	2.26634	-1.6772	1.5383e-10	1.38464e-09
NR1D1	protein_coding	ENSG00000126368	1.51514	4.4506	4.86204e-71	7.85987e-69
PRRG2	protein_coding	ENSG00000126460	0.917421	-1.10347	0.00145227	0.00442067
GLIS2	protein_coding	ENSG00000126603	-0.889135	4.12269	2.80787e-27	8.88739e-26
HSPA2	protein_coding	ENSG00000126803	1.3181	-2.05105	0.000159046	0.00059896
RHOT1	protein_coding	ENSG00000126858	-0.709245	5.00795	8.80757e-23	2.18935e-21
EVI2A	protein_coding	ENSG00000126860	0.604992	-0.193474	0.0180388	0.0408673
ARMCX1	protein_coding	ENSG00000126947	-1.36922	3.75653	1.05778e-63	1.31333e-61
FGD3	protein_coding	ENSG00000127084	-1.22511	-1.6985	3.765e-05	0.000159465
HIVEP3	protein_coding	ENSG00000127124	0.705849	4.64312	1.06006e-19	2.12781e-18
ABHD8	protein_coding	ENSG00000127220	-0.791548	3.61613	1.51471e-20	3.24021e-19
ATP13A4	protein_coding	ENSG00000127249	-1.90389	-2.88069	7.50764e-06	3.61023e-05
TAS2R3	protein_coding	ENSG00000127362	1.83065	-2.84152	0.00109528	0.00343159
TAS2R4	protein_coding	ENSG00000127364	0.699533	-0.222524	0.00088753	0.00283602
ADGRE2	protein_coding	ENSG00000127507	1.8767	0.726875	7.57451e-30	2.71904e-28
F2RL3	protein_coding	ENSG00000127533	3.64338	-3.99556	0.000399452	0.00137727
TUBA4A	protein_coding	ENSG00000127824	0.892618	6.4304	5.0787e-36	2.43686e-34
ZNF835	protein_coding	ENSG00000127903	-0.714138	-0.909088	0.00775392	0.0195856
GNG11	protein_coding	ENSG00000127920	1.76479	4.53401	2.43353e-76	4.27858e-74
STEAP4	protein_coding	ENSG00000127954	3.39051	-2.52435	1.02079e-11	1.04009e-10
GNAI1	protein_coding	ENSG00000127955	-0.650454	4.72805	3.5511e-19	6.92594e-18
ADM2	protein_coding	ENSG00000128165	-1.09831	4.53312	1.53469e-51	1.26164e-49
DGCR8	protein_coding	ENSG00000128191	0.844319	6.00913	1.02931e-37	5.2751e-36
C22orf24	processed_transcript	ENSG00000128254	1.07327	-1.68077	0.000453357	0.00154303
GNAZ	protein_coding	ENSG00000128266	-0.767576	3.81852	9.0174e-22	2.08247e-20
ADORA2A	protein_coding	ENSG00000128271	-1.00909	0.876563	7.66951e-07	4.33957e-06
A4GALT	protein_coding	ENSG00000128274	-0.713831	0.30686	5.48002e-05	0.000225444
MCHR1	protein_coding	ENSG00000128285	1.61814	-2.67655	0.00072879	0.00237093
BAIAP2L2	protein_coding	ENSG00000128298	-0.663537	-0.863278	0.00372213	0.0102148
RAC2	protein_coding	ENSG00000128340	1.0439	4.08118	4.71591e-36	2.26731e-34
LIF	protein_coding	ENSG00000128342	1.15701	7.73796	2.47254e-64	3.15112e-62
KRT17	protein_coding	ENSG00000128422	1.25704	8.90562	1.50072e-69	2.28783e-67
DOCK4	protein_coding	ENSG00000128512	0.742855	5.15464	1.02308e-25	2.9798e-24
VGF	protein_coding	ENSG00000128564	1.40205	8.39371	6.55371e-65	8.44167e-63
FOXP2	protein_coding	ENSG00000128573	-2.98688	-2.73666	1.17031e-10	1.06737e-09
FLNC	protein_coding	ENSG00000128591	1.15315	10.3865	1.57153e-45	1.05441e-43
LRRC4	protein_coding	ENSG00000128594	0.911758	-0.809291	0.000890744	0.00284554
SMO	protein_coding	ENSG00000128602	-0.685417	4.75738	9.14955e-21	1.98545e-19
IRF5	protein_coding	ENSG00000128604	-0.600323	-1.21227	0.0172542	0.0393276
LRRC17	protein_coding	ENSG00000128606	-0.671063	2.05144	4.13991e-09	3.19302e-08
HOXD1	protein_coding	ENSG00000128645	0.683039	-1.29615	0.0211869	0.0468805
HOXD3	protein_coding	ENSG00000128652	-0.949436	-0.619839	4.40486e-06	2.20628e-05
PDE11A	protein_coding	ENSG00000128655	-0.602061	0.0686472	0.000851204	0.00273118
OSGEPL1	protein_coding	ENSG00000128694	-1.14657	2.71372	1.10823e-26	3.4092e-25
ARHGAP22	protein_coding	ENSG00000128805	0.979205	2.68478	7.42238e-22	1.7257e-20
WDFY4	protein_coding	ENSG00000128815	0.9199	-0.67107	0.000143914	0.000546675
CGNL1	protein_coding	ENSG00000128849	-1.11156	4.07688	4.49989e-43	2.70297e-41
CHAC1	protein_coding	ENSG00000128965	-1.69624	3.42513	1.13017e-92	2.92713e-90
BBOX1	protein_coding	ENSG00000129151	4.38754	-3.4613	8.10311e-07	4.56735e-06
KCNC1	protein_coding	ENSG00000129159	-0.901624	2.45846	3.99746e-20	8.27918e-19
TPH1	protein_coding	ENSG00000129167	1.19645	0.376332	4.25295e-11	4.05064e-10
MTUS1	protein_coding	ENSG00000129422	-1.24442	5.64481	3.41301e-58	3.55884e-56
KLK10	protein_coding	ENSG00000129451	0.721957	-0.596896	0.00138293	0.00423583
AJUBA	protein_coding	ENSG00000129474	-0.821767	6.90536	4.90945e-38	2.55408e-36
PARP2	protein_coding	ENSG00000129484	-0.931519	5.94671	2.40358e-47	1.71795e-45
FOXA1	protein_coding	ENSG00000129514	2.73466	0.714964	9.38218e-49	7.01828e-47
EGLN3	protein_coding	ENSG00000129521	0.624956	1.68965	1.29209e-07	8.17726e-07
CDO1	protein_coding	ENSG00000129596	1.02694	2.23306	1.06265e-18	1.99502e-17
FOXJ1	protein_coding	ENSG00000129654	1.26857	-2.52693	0.00887317	0.0220748
CDKN1C	protein_coding	ENSG00000129757	-0.940165	0.885482	1.6368e-10	1.46837e-09
CDH15	protein_coding	ENSG00000129910	1.15408	0.202972	2.76837e-10	2.42391e-09
LBP	protein_coding	ENSG00000129988	-0.896254	-2.26771	0.00927276	0.0229551
SYT5	protein_coding	ENSG00000129990	1.47645	0.130697	1.13924e-13	1.39223e-12
CBFA2T3	protein_coding	ENSG00000129993	-2.10874	-4.37686	0.00282533	0.00800821
NXNL2	protein_coding	ENSG00000130045	-0.646028	0.538864	3.8779e-05	0.000163872
STARD8	protein_coding	ENSG00000130052	-0.796134	3.75038	6.94091e-19	1.32163e-17
GDPD2	protein_coding	ENSG00000130055	-0.819324	-0.111217	5.37903e-05	0.000221706
SAT1	protein_coding	ENSG00000130066	0.622719	3.50038	1.70971e-12	1.86596e-11
FAM98C	protein_coding	ENSG00000130244	-0.615203	3.24835	2.41766e-12	2.60673e-11
KIF1A	protein_coding	ENSG00000130294	0.656152	6.36561	1.18842e-21	2.73405e-20
RSPH3	protein_coding	ENSG00000130363	0.623025	4.99186	1.23818e-18	2.31195e-17
UNC13A	protein_coding	ENSG00000130477	1.21957	5.53377	5.73546e-73	9.52759e-71
PGPEP1	protein_coding	ENSG00000130517	-0.678408	3.93814	9.39177e-17	1.50914e-15
JUND	protein_coding	ENSG00000130522	-0.657125	5.43928	3.01195e-21	6.78026e-20
CALY	protein_coding	ENSG00000130643	0.984359	-2.48987	0.0168781	0.0385934
CYP2E1	protein_coding	ENSG00000130649	0.816531	-1.85052	0.0128639	0.0304914
ZNF337	protein_coding	ENSG00000130684	-0.765207	3.8109	2.48075e-21	5.60017e-20
GATA5	protein_coding	ENSG00000130700	-1.26465	-1.22187	3.08045e-06	1.58274e-05
ATG4D	protein_coding	ENSG00000130734	-0.742225	3.3095	4.2758e-14	5.44351e-13
NPAS1	protein_coding	ENSG00000130751	0.682393	0.887353	1.12742e-06	6.20288e-06
ARHGEF16	protein_coding	ENSG00000130762	0.766413	2.24926	1.21076e-13	1.47664e-12
SESN2	protein_coding	ENSG00000130766	-1.20565	5.27692	6.23358e-65	8.07249e-63
CCDC62	protein_coding	ENSG00000130783	-1.33153	3.4457	7.04523e-50	5.49186e-48
SLC7A10	protein_coding	ENSG00000130876	-0.655582	0.523612	5.51945e-05	0.000226872
FBP2	protein_coding	ENSG00000130957	4.26337	-2.1108	8.83652e-17	1.42086e-15
AKAP12	protein_coding	ENSG00000131016	1.43712	8.91085	1.05449e-76	1.86762e-74
SYNE1	protein_coding	ENSG00000131018	1.16606	7.62003	5.22791e-58	5.40449e-56
TTLL9	protein_coding	ENSG00000131044	0.680917	-1.14337	0.0107611	0.0261135
ZNF341	protein_coding	ENSG00000131061	-0.690749	1.93703	1.43602e-08	1.03252e-07
EDA2R	protein_coding	ENSG00000131080	-0.822906	5.58663	2.92835e-34	1.28013e-32
ZNF227	protein_coding	ENSG00000131115	-0.606228	4.5247	3.8731e-16	5.91574e-15
GSE1	protein_coding	ENSG00000131149	-0.667255	6.41368	1.10513e-24	3.04918e-23
IDO1	protein_coding	ENSG00000131203	4.85426	-3.54334	0.01861	0.0419992
TRAF3	protein_coding	ENSG00000131323	0.792513	5.56747	3.55919e-28	1.18249e-26
PDLIM4	protein_coding	ENSG00000131435	1.48068	7.24682	1.02427e-99	2.90255e-97
GFPT2	protein_coding	ENSG00000131459	1.33029	6.07406	9.05236e-86	2.01893e-83
AOC3	protein_coding	ENSG00000131471	0.598766	2.88198	1.52175e-07	9.49353e-07
AOC2	protein_coding	ENSG00000131480	0.748137	3.30337	4.43313e-16	6.74548e-15
ANO1	protein_coding	ENSG00000131620	2.35339	3.80625	2.98668e-159	2.76693e-156
KREMEN2	protein_coding	ENSG00000131650	1.04728	4.68854	3.74388e-33	1.5738e-31
NINJ1	protein_coding	ENSG00000131669	-0.631998	5.3702	5.0929e-21	1.12647e-19
KRT34	protein_coding	ENSG00000131737	1.93164	5.40188	3.175e-106	1.01968e-103
KRT33B	protein_coding	ENSG00000131738	1.65125	1.42324	3.12255e-28	1.03885e-26
TNS4	protein_coding	ENSG00000131746	3.54745	3.19939	3.45966e-226	7.57571e-223
CLUHP3	transcribed_unprocessed_pseudogene	ENSG00000131797	-0.585449	2.84506	3.52123e-10	3.04655e-09
KRT17P1	transcribed_unprocessed_pseudogene	ENSG00000131885	7.47707	0.0335429	6.641e-64	8.28817e-62
LIN28A	protein_coding	ENSG00000131914	2.40042	-3.04143	0.000862975	0.00276563
CCT6B	protein_coding	ENSG00000132141	1.37324	-2.43116	0.00438646	0.0117999
SLC6A11	protein_coding	ENSG00000132164	-0.600187	2.05156	3.81336e-08	2.58593e-07
FCRLA	protein_coding	ENSG00000132185	1.67856	0.997792	5.55279e-30	2.01128e-28
HSD17B7	protein_coding	ENSG00000132196	-0.599186	3.83835	2.7566e-13	3.24368e-12
PER2	protein_coding	ENSG00000132326	0.752888	4.32563	8.6192e-21	1.87205e-19
RAMP1	protein_coding	ENSG00000132329	0.751839	-0.491346	0.00209424	0.00612853
PTPRE	protein_coding	ENSG00000132334	1.78678	4.52587	2.73724e-122	1.19876e-119
CARD6	protein_coding	ENSG00000132357	-0.729363	2.51031	2.61698e-12	2.81533e-11
RAP1GAP2	protein_coding	ENSG00000132359	0.823136	6.55844	4.26337e-32	1.71439e-30
MYBBP1A	protein_coding	ENSG00000132382	0.663004	6.26903	2.19623e-24	5.98424e-23
PNISR	protein_coding	ENSG00000132424	-0.661642	7.35906	2.53543e-22	6.11321e-21
UTP3	protein_coding	ENSG00000132467	0.8366	7.28158	5.67208e-34	2.43535e-32
H3F3B	protein_coding	ENSG00000132475	0.946172	9.27662	3.72891e-44	2.35744e-42
TRIM47	protein_coding	ENSG00000132481	1.27737	5.16567	5.41059e-64	6.78775e-62
KDM6B	protein_coding	ENSG00000132510	0.996461	5.31136	4.04614e-41	2.28778e-39
SLC52A1	protein_coding	ENSG00000132517	-1.97768	0.227131	6.06024e-28	1.99963e-26
XAF1	protein_coding	ENSG00000132530	1.73688	-2.38667	7.26163e-05	0.000292596
NIP7	protein_coding	ENSG00000132603	0.814324	6.28016	1.58358e-23	4.11474e-22
KHDC4	protein_coding	ENSG00000132680	-0.708549	6.30194	6.76691e-26	1.99017e-24
NES	protein_coding	ENSG00000132688	0.638051	7.48849	2.77266e-22	6.64527e-21
CRP	protein_coding	ENSG00000132693	2.54987	-3.95068	0.00712966	0.0181743
TESMIN	protein_coding	ENSG00000132749	-0.586764	-0.282991	0.00581858	0.0151696
TOE1	protein_coding	ENSG00000132773	0.744566	5.28982	1.49826e-26	4.55664e-25
LPIN3	protein_coding	ENSG00000132793	-0.979976	3.84965	7.99198e-34	3.41317e-32
VSTM2L	protein_coding	ENSG00000132821	1.48467	-1.54641	8.54332e-06	4.0717e-05
KANK4	protein_coding	ENSG00000132854	-0.66415	-1.9185	0.0181403	0.0410818
SYT4	protein_coding	ENSG00000132872	1.34588	-1.23858	0.00040744	0.0014026
FBXO44	protein_coding	ENSG00000132879	-1.03902	3.8201	1.60147e-32	6.56345e-31
ALOX5AP	protein_coding	ENSG00000132965	0.697075	0.0540097	0.00012634	0.000485585
GPR12	protein_coding	ENSG00000132975	-0.884318	-1.6626	0.00209374	0.00612783
CHRM3	protein_coding	ENSG00000133019	0.726638	0.826899	5.02782e-07	2.91398e-06
MPRIP	protein_coding	ENSG00000133030	0.915811	8.73539	1.08127e-44	7.0391e-43
PIK3C2B	protein_coding	ENSG00000133056	-1.27962	3.08746	1.12643e-44	7.31332e-43
DCLK1	protein_coding	ENSG00000133083	1.54193	6.00755	1.06434e-106	3.46442e-104
CCNA1	protein_coding	ENSG00000133101	1.59488	-3.04918	0.0042501	0.0114741
TRPC4	protein_coding	ENSG00000133107	2.0402	-0.34667	4.18154e-17	7.00423e-16
POSTN	protein_coding	ENSG00000133110	1.71988	-0.93294	1.20784e-05	5.61755e-05
RFXAP	protein_coding	ENSG00000133111	-1.2739	2.61655	5.67933e-38	2.92929e-36
KL	protein_coding	ENSG00000133116	3.79961	-3.49491	6.36519e-07	3.63917e-06
KMT5C	protein_coding	ENSG00000133247	-0.680757	2.97615	1.15446e-10	1.05372e-09
MYH11	protein_coding	ENSG00000133392	1.28594	-2.38852	0.0226432	0.0496061
GGT2	protein_coding	ENSG00000133475	-2.27416	-3.90181	0.000593275	0.0019666
ZNF767P	transcribed_unprocessed_pseudogene	ENSG00000133624	-0.761039	2.34041	7.19103e-12	7.42754e-11
BTG1	protein_coding	ENSG00000133639	1.12712	5.45371	6.76068e-57	6.78519e-55
LRRIQ1	protein_coding	ENSG00000133640	-0.784669	0.209304	2.73592e-05	0.00011891
ARNTL	protein_coding	ENSG00000133794	0.900951	5.1987	3.3243e-35	1.53396e-33
MICAL2	protein_coding	ENSG00000133816	0.779624	8.77683	7.15622e-31	2.68911e-29
TEX15	protein_coding	ENSG00000133863	2.53344	-2.45911	5.22102e-07	3.02232e-06
TTC9	protein_coding	ENSG00000133985	-1.18366	3.1139	1.99794e-39	1.08388e-37
IRAK2	protein_coding	ENSG00000134070	0.820739	1.72539	1.92026e-09	1.53563e-08
TSPAN2	protein_coding	ENSG00000134198	0.641092	3.05839	3.00744e-12	3.23249e-11
TRIM45	protein_coding	ENSG00000134253	-0.822822	2.58209	1.94825e-14	2.57843e-13
NGF	protein_coding	ENSG00000134259	0.870912	1.49168	2.32655e-12	2.51411e-11
PLEKHA8P1	transcribed_processed_pseudogene	ENSG00000134297	-0.903136	3.5494	2.4375e-27	7.73545e-26
GRHL1	protein_coding	ENSG00000134317	-1.41051	1.87718	4.50009e-32	1.80056e-30
MYCN	protein_coding	ENSG00000134323	-1.22825	-0.993821	6.99658e-06	3.38611e-05
LPIN1	protein_coding	ENSG00000134324	-1.00354	6.58349	4.89416e-48	3.60506e-46
SAA2	protein_coding	ENSG00000134339	1.92367	-1.0389	2.42517e-09	1.92218e-08
FST	protein_coding	ENSG00000134363	0.805551	5.59268	3.47047e-24	9.38194e-23
NAV1	protein_coding	ENSG00000134369	0.639378	6.03016	1.78559e-20	3.79606e-19
EMP1	protein_coding	ENSG00000134531	1.13827	8.73911	9.52393e-69	1.4285e-66
DDB2	protein_coding	ENSG00000134574	-0.652985	6.05524	8.85425e-25	2.4514e-23
SPOCD1	protein_coding	ENSG00000134668	2.48363	3.82717	1.60218e-143	8.97483e-141
PHC2	protein_coding	ENSG00000134686	0.727017	6.15927	7.8739e-28	2.58039e-26
HOOK1	protein_coding	ENSG00000134709	-3.02317	-3.42917	0.00015435	0.000582185
DTNA	protein_coding	ENSG00000134769	-0.9767	3.84043	9.19091e-35	4.1535e-33
SLC43A3	protein_coding	ENSG00000134802	0.599831	5.81717	4.41615e-18	7.92637e-17
APLNR	protein_coding	ENSG00000134817	1.65469	-1.55122	2.43317e-07	1.4733e-06
TCN1	protein_coding	ENSG00000134827	0.87803	-0.0739381	1.7119e-05	7.70739e-05
C5AR2	protein_coding	ENSG00000134830	2.02528	0.305975	9.46818e-26	2.76436e-24
ETS1	protein_coding	ENSG00000134954	1.07457	7.68107	1.42397e-43	8.81728e-42
SLC37A2	protein_coding	ENSG00000134955	0.681483	1.00335	2.1091e-06	1.1114e-05
TMED7	protein_coding	ENSG00000134970	0.691418	6.85217	4.32561e-23	1.08759e-21
NREP	protein_coding	ENSG00000134986	-0.619816	4.92622	2.41519e-13	2.86716e-12
FAM189A2	protein_coding	ENSG00000135063	-0.960892	-2.2518	0.00593606	0.0154275
ADAM19	protein_coding	ENSG00000135074	0.719836	7.75459	1.72596e-28	5.81444e-27
HAVCR2	protein_coding	ENSG00000135077	2.91006	1.91485	4.95346e-109	1.68048e-106
USP30	protein_coding	ENSG00000135093	-0.799327	2.61792	1.31686e-14	1.77005e-13
TBX3	protein_coding	ENSG00000135111	1.30113	6.18607	3.24649e-77	5.87956e-75
OASL	protein_coding	ENSG00000135114	1.68849	1.99416	7.82851e-37	3.89598e-35
HRK	protein_coding	ENSG00000135116	-1.09735	1.64301	2.34604e-13	2.79195e-12
BICDL1	protein_coding	ENSG00000135127	-0.957813	3.26588	2.82427e-27	8.91153e-26
DMTF1	protein_coding	ENSG00000135164	-0.604061	5.37272	5.10111e-19	9.81393e-18
FAM71F1	protein_coding	ENSG00000135248	1.56924	-3.27308	0.00595285	0.0154578
KCP	protein_coding	ENSG00000135253	0.859847	-1.75347	0.0178516	0.0404851
KHDC1	protein_coding	ENSG00000135314	-0.700588	3.06751	1.9653e-15	2.82279e-14
CEP162	protein_coding	ENSG00000135315	-0.71928	3.4252	1.60508e-12	1.75574e-11
NT5E	protein_coding	ENSG00000135318	3.75678	-0.518412	9.09749e-35	4.11901e-33
PHF21A	protein_coding	ENSG00000135365	-0.712585	4.83526	3.70381e-20	7.69084e-19
EHF	protein_coding	ENSG00000135373	1.19632	-0.987334	7.98961e-06	3.83129e-05
PRRG4	protein_coding	ENSG00000135378	-1.62332	1.96687	2.90118e-48	2.15681e-46
AGAP2	protein_coding	ENSG00000135439	0.97528	4.17502	5.507e-38	2.8465e-36
KRT7	protein_coding	ENSG00000135480	0.829245	2.81647	2.24844e-16	3.49407e-15
MIP	protein_coding	ENSG00000135517	1.95835	-3.06569	0.000121465	0.000468115
MAP7	protein_coding	ENSG00000135525	0.674988	1.71848	1.01343e-08	7.41285e-08
STX11	protein_coding	ENSG00000135604	1.08798	1.9925	1.87664e-15	2.70028e-14
TEC	protein_coding	ENSG00000135605	1.72969	-2.15925	1.70476e-05	7.67956e-05
EGR4	protein_coding	ENSG00000135625	2.06769	-0.148696	1.56705e-14	2.08885e-13
RAB11FIP5	protein_coding	ENSG00000135631	-0.916209	6.50763	1.91744e-43	1.1752e-41
MDM2	protein_coding	ENSG00000135679	-0.946336	7.06756	4.57942e-50	3.59298e-48
CCDC102A	protein_coding	ENSG00000135736	-0.671442	4.63749	2.19138e-20	4.6261e-19
URB2	protein_coding	ENSG00000135763	0.587244	5.87506	8.01284e-19	1.51496e-17
KIAA1614	protein_coding	ENSG00000135835	-1.11066	1.15581	6.7493e-17	1.10217e-15
GPR55	protein_coding	ENSG00000135898	1.02423	-1.58512	0.00519079	0.0137095
CHRND	protein_coding	ENSG00000135902	4.1114	-3.73248	1.48036e-05	6.75459e-05
DOCK10	protein_coding	ENSG00000135905	0.716803	4.62146	6.43896e-22	1.50141e-20
SLC19A3	protein_coding	ENSG00000135917	-2.42819	-3.68662	9.1724e-06	4.34314e-05
WNT10A	protein_coding	ENSG00000135925	0.925684	1.78163	2.60525e-13	3.07913e-12
GPR45	protein_coding	ENSG00000135973	-0.803534	2.11516	1.59439e-13	1.92695e-12
ARHGEF4	protein_coding	ENSG00000136002	0.656262	0.519097	6.75543e-05	0.000273614
SLC41A2	protein_coding	ENSG00000136052	0.731129	4.09747	1.1313e-20	2.44171e-19
RPL13AP25	processed_pseudogene	ENSG00000136149	-0.809114	-0.592331	0.000464264	0.00157561
SCEL	protein_coding	ENSG00000136155	1.29	2.75197	6.28681e-35	2.87344e-33
SPRY2	protein_coding	ENSG00000136158	0.862845	5.2414	5.86805e-22	1.37227e-20
LCP1	protein_coding	ENSG00000136167	1.44575	3.05637	1.67011e-46	1.16603e-44
RAPGEF5	protein_coding	ENSG00000136237	-1.15911	0.696826	5.87252e-16	8.82968e-15
IL6	protein_coding	ENSG00000136244	2.46687	1.63004	1.49487e-41	8.57308e-40
MYO1G	protein_coding	ENSG00000136286	1.78491	-0.997877	1.83841e-10	1.63946e-09
MMD2	protein_coding	ENSG00000136297	2.35224	-2.7948	7.21863e-06	3.48377e-05
NKX2-1	protein_coding	ENSG00000136352	-0.775972	0.663699	9.62959e-08	6.20182e-07
ALPK3	protein_coding	ENSG00000136383	1.66973	1.13093	1.60224e-32	6.56345e-31
RTP4	protein_coding	ENSG00000136514	-1.43119	-2.39692	7.65067e-05	0.000307085
SCN2A	protein_coding	ENSG00000136531	-0.884273	2.03779	4.48106e-17	7.45924e-16
SCN7A	protein_coding	ENSG00000136546	1.8642	-1.95029	8.87709e-06	4.21741e-05
IL10	protein_coding	ENSG00000136634	6.64658	-3.62329	1.70543e-05	7.68115e-05
IL1RN	protein_coding	ENSG00000136689	5.73582	0.284627	2.50809e-73	4.25439e-71
HS6ST1	protein_coding	ENSG00000136720	-0.825351	5.50852	1.89317e-34	8.36711e-33
RALGPS1	protein_coding	ENSG00000136828	-0.670057	2.11806	4.24712e-10	3.64543e-09
TMOD1	protein_coding	ENSG00000136842	0.615898	3.59151	1.45348e-11	1.45996e-10
SLC31A2	protein_coding	ENSG00000136867	-0.661372	2.50104	1.07949e-11	1.09805e-10
BAAT	protein_coding	ENSG00000136881	1.03953	-0.605591	0.000321587	0.00113329
LMX1B	protein_coding	ENSG00000136944	-1.29389	1.75738	5.10037e-24	1.37112e-22
MYC	protein_coding	ENSG00000136997	0.788466	7.77156	2.9255e-29	1.02422e-27
SIT1	protein_coding	ENSG00000137078	3.82272	-3.29012	4.63629e-07	2.70463e-06
DMRT1	protein_coding	ENSG00000137090	-1.07912	-1.62001	0.000965071	0.00306469
DNAJB5	protein_coding	ENSG00000137094	1.10537	6.75969	1.99809e-59	2.1582e-57
TMEM8B	protein_coding	ENSG00000137103	-0.663814	1.84666	8.08749e-08	5.25359e-07
KIF13A	protein_coding	ENSG00000137177	-0.833795	4.84106	5.95124e-28	1.96906e-26
ZSCAN9	protein_coding	ENSG00000137185	-0.608332	4.10353	2.35914e-14	3.0883e-13
TINAG	protein_coding	ENSG00000137251	6.24424	-3.82648	0.000493847	0.00166858
SLC22A23	protein_coding	ENSG00000137266	-1.41551	2.14812	1.62986e-38	8.66634e-37
TCF19	protein_coding	ENSG00000137310	-0.659947	6.04602	9.46355e-26	2.76436e-24
IER3	protein_coding	ENSG00000137331	0.640709	7.48645	6.25993e-11	5.88766e-10
RNF144B	protein_coding	ENSG00000137393	-1.13492	0.83447	1.81257e-16	2.8424e-15
SLCO2B1	protein_coding	ENSG00000137491	2.85703	-1.11226	9.35478e-20	1.88559e-18
RAB30	protein_coding	ENSG00000137502	-0.763468	4.60544	6.67136e-26	1.96446e-24
TTPA	protein_coding	ENSG00000137561	-1.04426	1.43924	4.98615e-17	8.24307e-16
TRPC6	protein_coding	ENSG00000137672	0.832524	-0.489692	4.45722e-05	0.000186132
BTG4	protein_coding	ENSG00000137707	0.800356	0.00471816	2.18418e-05	9.64796e-05
POU2F3	protein_coding	ENSG00000137709	2.05533	-1.59509	3.24362e-08	2.22147e-07
MMP13	protein_coding	ENSG00000137745	1.32561	1.76184	6.83075e-16	1.0213e-14
MAP2K5	protein_coding	ENSG00000137764	-0.713024	3.84214	1.40172e-17	2.42901e-16
THBS1	protein_coding	ENSG00000137801	1.65354	10.2293	5.23169e-135	2.68118e-132
ITGA11	protein_coding	ENSG00000137809	0.638928	1.74077	5.43866e-08	3.61881e-07
PAQR5	protein_coding	ENSG00000137819	1.12297	4.44808	3.33667e-50	2.62648e-48
SMAD6	protein_coding	ENSG00000137834	-0.587404	3.09475	2.82144e-11	2.74475e-10
CYP19A1	protein_coding	ENSG00000137869	1.09056	-2.15443	0.00271861	0.00773393
SPTBN5	protein_coding	ENSG00000137877	1.06044	4.91651	1.51177e-11	1.51409e-10
GCOM1	protein_coding	ENSG00000137878	-0.727971	0.585693	1.21751e-05	5.65813e-05
BCAR3	protein_coding	ENSG00000137936	0.86755	5.66968	1.34906e-36	6.61806e-35
IFI44L	protein_coding	ENSG00000137959	0.975421	1.41025	5.8949e-10	4.98737e-09
GIPC2	protein_coding	ENSG00000137960	1.86938	-2.45759	0.000219542	0.000803054
ARHGAP29	protein_coding	ENSG00000137962	1.03845	8.18742	2.17114e-52	1.84793e-50
KHK	protein_coding	ENSG00000138030	-0.796484	1.78069	8.59597e-12	8.81819e-11
TRIM54	protein_coding	ENSG00000138100	0.894069	0.351637	5.1502e-08	3.43447e-07
STAMBPL1	protein_coding	ENSG00000138134	0.5895	4.84019	7.35824e-17	1.19313e-15
BTBD16	protein_coding	ENSG00000138152	0.773463	-1.47848	0.0064754	0.0166671
DUSP5	protein_coding	ENSG00000138166	1.68817	5.34939	2.71562e-32	1.10492e-30
PLCE1	protein_coding	ENSG00000138193	-1.15736	5.72366	1.31431e-53	1.17251e-51
ZNF365	protein_coding	ENSG00000138311	1.06672	4.00965	2.70349e-42	1.57673e-40
TET1	protein_coding	ENSG00000138336	-0.715024	2.16755	7.76315e-09	5.79458e-08
DNA2	protein_coding	ENSG00000138346	-0.6288	4.93994	4.12705e-21	9.17896e-20
MYPN	protein_coding	ENSG00000138347	3.2971	1.32731	1.80789e-84	3.88809e-82
BARD1	protein_coding	ENSG00000138376	-0.58891	4.58175	1.40081e-15	2.03998e-14
MSTN	protein_coding	ENSG00000138379	-0.790616	-1.18793	0.0129346	0.0306317
CDK15	protein_coding	ENSG00000138395	-0.67015	0.824115	1.05274e-05	4.92855e-05
FAM117B	protein_coding	ENSG00000138439	-0.600017	2.64845	4.35601e-08	2.93245e-07
SLC40A1	protein_coding	ENSG00000138449	-0.949843	3.99673	3.75008e-32	1.51557e-30
PARP9	protein_coding	ENSG00000138496	-1.0151	4.3824	1.82797e-44	1.16791e-42
CILP	protein_coding	ENSG00000138615	1.43565	-1.21413	5.47991e-06	2.69817e-05
SEMA7A	protein_coding	ENSG00000138623	1.40593	7.83964	5.24946e-104	1.66373e-101
ARHGAP24	protein_coding	ENSG00000138639	-1.39205	0.413559	7.9413e-14	9.87008e-13
FGF5	protein_coding	ENSG00000138675	1.87233	5.06309	8.22671e-82	1.69365e-79
GPAT3	protein_coding	ENSG00000138678	1.06125	5.09471	8.14062e-48	5.90612e-46
FGF2	protein_coding	ENSG00000138685	0.881378	5.05569	1.18087e-37	6.03898e-36
PDE5A	protein_coding	ENSG00000138735	-1.04555	3.31268	2.91791e-34	1.27788e-32
CDKL2	protein_coding	ENSG00000138769	-0.590955	-1.16552	0.019012	0.0427902
ENPEP	protein_coding	ENSG00000138792	1.11484	-0.159071	2.742e-08	1.89571e-07
B4GALNT3	protein_coding	ENSG00000139044	0.619313	3.25757	2.43626e-11	2.38352e-10
PRICKLE1	protein_coding	ENSG00000139174	-0.764936	4.23953	1.94048e-21	4.40948e-20
CLSTN3	protein_coding	ENSG00000139182	0.587445	6.30751	4.18147e-18	7.51075e-17
KLRG1	protein_coding	ENSG00000139187	-0.968399	-0.901569	0.000523442	0.00175821
VAMP1	protein_coding	ENSG00000139190	-1.19778	4.42811	4.37718e-56	4.25134e-54
COL2A1	protein_coding	ENSG00000139219	1.42528	-1.89937	0.000125561	0.000482743
LRIG3	protein_coding	ENSG00000139263	-0.838326	3.23273	1.67769e-17	2.89473e-16
INHBE	protein_coding	ENSG00000139269	-1.36919	1.85425	2.00894e-34	8.86253e-33
GLIPR1	protein_coding	ENSG00000139278	0.749245	6.31005	3.68481e-29	1.28075e-27
PHLDA1	protein_coding	ENSG00000139289	1.88325	5.77473	2.09199e-131	9.50752e-129
SLC46A3	protein_coding	ENSG00000139508	-0.679222	3.17961	2.22343e-14	2.92016e-13
SUOX	protein_coding	ENSG00000139531	-0.811118	3.27287	2.96751e-20	6.22093e-19
DHH	protein_coding	ENSG00000139549	1.99371	-1.6315	1.78403e-07	1.10326e-06
KRT71	protein_coding	ENSG00000139648	1.1616	-2.59584	0.0113339	0.02733
LPAR6	protein_coding	ENSG00000139679	8.41633	-1.75804	5.60774e-17	9.24528e-16
RHOF	protein_coding	ENSG00000139725	1.09024	6.49191	6.77476e-61	7.84537e-59
MBNL2	protein_coding	ENSG00000139793	-0.841286	4.53755	1.26834e-22	3.10787e-21
GRTP1	protein_coding	ENSG00000139835	-1.01022	1.30277	1.11836e-13	1.36879e-12
TTC6	protein_coding	ENSG00000139865	0.673359	-0.524099	0.0021513	0.00626507
NOVA1	protein_coding	ENSG00000139910	-0.952907	2.17797	2.1803e-20	4.60674e-19
SYT16	protein_coding	ENSG00000139973	-0.939267	3.86529	7.09948e-32	2.79878e-30
STON2	protein_coding	ENSG00000140022	-0.71908	4.10658	3.78547e-21	8.4583e-20
GPR65	protein_coding	ENSG00000140030	2.52424	1.43559	3.52487e-48	2.61242e-46
JDP2	protein_coding	ENSG00000140044	-0.844845	5.30039	9.00698e-35	4.08571e-33
SLC24A4	protein_coding	ENSG00000140090	-0.98642	0.218509	2.00559e-07	1.22767e-06
CDAN1	protein_coding	ENSG00000140326	-0.617592	4.43844	6.59758e-18	1.17022e-16
TLE3	protein_coding	ENSG00000140332	0.722859	6.59417	2.05147e-27	6.5885e-26
PSTPIP1	protein_coding	ENSG00000140368	1.9879	-1.80225	2.69401e-08	1.86467e-07
BCL2A1	protein_coding	ENSG00000140379	3.85949	3.43419	1.14879e-54	1.0809e-52
SCAPER	protein_coding	ENSG00000140386	-0.683118	3.70439	2.40139e-16	3.72216e-15
NCOA2	protein_coding	ENSG00000140396	-0.588415	5.5061	9.69545e-16	1.43185e-14
TPM1	protein_coding	ENSG00000140416	0.681814	8.76798	1.22144e-25	3.54041e-24
IGF1R	protein_coding	ENSG00000140443	0.966915	7.83469	9.75006e-50	7.52723e-48
CYP11A1	protein_coding	ENSG00000140459	1.40392	0.893591	2.87428e-20	6.03074e-19
BBS4	protein_coding	ENSG00000140463	-0.735246	3.47799	2.66829e-18	4.85064e-17
CYP1A1	protein_coding	ENSG00000140465	1.63138	1.98183	6.6099e-42	3.81805e-40
ADAMTS17	protein_coding	ENSG00000140470	0.753832	1.97059	2.20222e-11	2.16775e-10
GOLGA6D	protein_coding	ENSG00000140478	3.24513	-3.21224	1.85683e-07	1.14563e-06
ABHD2	protein_coding	ENSG00000140526	1.89828	7.50379	1.56653e-171	1.64057e-168
MCTP2	protein_coding	ENSG00000140563	0.586802	3.4787	2.27919e-12	2.46515e-11
PMM2	protein_coding	ENSG00000140650	0.63758	5.32456	9.45585e-17	1.51842e-15
MARVELD3	protein_coding	ENSG00000140832	-2.14323	-2.69066	1.32067e-07	8.34278e-07
CHST4	protein_coding	ENSG00000140835	-0.978351	1.66437	1.49078e-16	2.36084e-15
CLEC18B	protein_coding	ENSG00000140839	-0.617691	-0.626026	0.0131696	0.0311301
KIFC3	protein_coding	ENSG00000140859	0.767053	6.88468	3.69362e-29	1.28196e-27
CMTM2	protein_coding	ENSG00000140932	1.43699	-1.88528	0.000119899	0.000463043
TLDC1	protein_coding	ENSG00000140950	0.757513	5.49107	7.34505e-30	2.6406e-28
ADAD2	protein_coding	ENSG00000140955	1.45116	-2.90102	0.00459698	0.0123167
RPL3L	protein_coding	ENSG00000140986	2.21685	-1.97139	4.15272e-08	2.80501e-07
TIGD7	protein_coding	ENSG00000140993	-1.02533	4.17607	1.69881e-41	9.71955e-40
GID4	protein_coding	ENSG00000141034	-1.07309	2.91844	8.82636e-32	3.45131e-30
KSR1	protein_coding	ENSG00000141068	-0.74755	4.347	2.23314e-24	6.07792e-23
TOB1	protein_coding	ENSG00000141232	-0.715058	4.73937	1.49336e-20	3.20024e-19
SKAP1	protein_coding	ENSG00000141293	0.589346	-0.136682	0.00627038	0.0162037
TAF4B	protein_coding	ENSG00000141384	0.899005	3.30836	5.95643e-21	1.31265e-19
PRELID3A	protein_coding	ENSG00000141391	-0.754506	3.08943	3.44796e-16	5.2865e-15
IMPA2	protein_coding	ENSG00000141401	-0.717591	2.6719	1.13768e-13	1.39103e-12
GAREM1	protein_coding	ENSG00000141441	-0.691174	2.4837	4.2014e-12	4.45223e-11
GREB1L	protein_coding	ENSG00000141449	-0.643856	2.53898	2.89855e-11	2.81749e-10
SLC14A1	protein_coding	ENSG00000141469	1.91501	-1.48381	4.35918e-09	3.35355e-08
ASGR1	protein_coding	ENSG00000141505	0.71903	1.94763	1.41481e-10	1.27922e-09
TMC6	protein_coding	ENSG00000141524	0.713126	3.85898	2.53547e-15	3.60306e-14
SLC16A3	protein_coding	ENSG00000141526	0.967595	3.54632	5.40974e-30	1.96538e-28
CARD14	protein_coding	ENSG00000141527	2.46828	-2.18516	6.91025e-08	4.53534e-07
SECTM1	protein_coding	ENSG00000141574	-1.46791	-3.2474	0.00461613	0.0123584
RNF165	protein_coding	ENSG00000141622	0.707884	2.02729	4.18565e-10	3.59685e-09
GRB7	protein_coding	ENSG00000141738	-1.13883	-1.12172	1.24811e-06	6.82017e-06
STAC2	protein_coding	ENSG00000141750	1.21509	-0.805921	8.15735e-07	4.59294e-06
IGFBP4	protein_coding	ENSG00000141753	0.849511	5.10652	1.23406e-36	6.06629e-35
MISP3	protein_coding	ENSG00000141854	-0.643368	0.245757	0.000195199	0.000721241
CCDC97	protein_coding	ENSG00000142039	-0.77638	4.67906	7.08379e-23	1.76816e-21
ZFP14	protein_coding	ENSG00000142065	-1.61953	2.07241	2.71419e-53	2.38602e-51
HUNK	protein_coding	ENSG00000142149	-0.813427	4.72188	1.84324e-30	6.841e-29
COL6A1	protein_coding	ENSG00000142156	0.64563	8.1425	9.58683e-24	2.51819e-22
SIK1	protein_coding	ENSG00000142178	1.00249	1.10185	1.05095e-10	9.65459e-10
DOP1B	protein_coding	ENSG00000142197	-0.67441	2.8302	6.6326e-08	4.35787e-07
URB1	protein_coding	ENSG00000142207	0.769775	7.10036	6.70336e-29	2.30006e-27
RNPEPL1	protein_coding	ENSG00000142327	-0.756535	4.76031	8.75164e-22	2.02498e-20
CACNG8	protein_coding	ENSG00000142408	1.5256	4.15851	1.38949e-60	1.57871e-58
EVI5L	protein_coding	ENSG00000142459	-0.703574	2.93266	1.02246e-12	1.14124e-11
GPR32	protein_coding	ENSG00000142511	6.28373	-4.21644	0.000216275	0.000791825
KLK3	protein_coding	ENSG00000142515	2.58872	-3.99646	0.00530769	0.013983
CFAP74	protein_coding	ENSG00000142609	1.77781	-0.302916	1.27962e-17	2.22543e-16
FHAD1	protein_coding	ENSG00000142621	1.09304	0.878843	4.72403e-12	4.97759e-11
PADI1	protein_coding	ENSG00000142623	1.40079	0.0337324	5.46338e-14	6.88986e-13
EFHD2	protein_coding	ENSG00000142634	1.16572	7.47581	6.17992e-66	8.55492e-64
IL22RA1	protein_coding	ENSG00000142677	-1.63229	0.781115	5.3511e-30	1.94995e-28
LMO4	protein_coding	ENSG00000143013	-1.06912	4.23254	4.89466e-46	3.33044e-44
ZNF697	protein_coding	ENSG00000143067	0.638477	6.68161	8.21515e-20	1.66424e-18
KCNA10	protein_coding	ENSG00000143105	-0.989943	-2.33681	0.00563611	0.0147482
CD53	protein_coding	ENSG00000143119	1.42476	-1.36255	1.55931e-06	8.38936e-06
TBX19	protein_coding	ENSG00000143178	-0.861502	0.916046	7.64105e-10	6.40397e-09
XCL1	protein_coding	ENSG00000143184	-0.625294	-1.20981	0.0166204	0.0380872
NECTIN4	protein_coding	ENSG00000143217	-0.7468	3.17543	1.85895e-16	2.91324e-15
RGS5	protein_coding	ENSG00000143248	1.16705	2.54194	4.11376e-27	1.29358e-25
F13B	protein_coding	ENSG00000143278	2.64357	-3.48537	0.00316042	0.0088497
RGS16	protein_coding	ENSG00000143333	1.3	3.5955	3.65651e-45	2.4064e-43
LHX9	protein_coding	ENSG00000143355	-0.769124	0.838002	1.72723e-07	1.06988e-06
TUFT1	protein_coding	ENSG00000143367	-0.958362	6.17174	1.20519e-48	8.98744e-47
CGN	protein_coding	ENSG00000143375	-0.790397	4.31357	1.45952e-26	4.45006e-25
MCL1	protein_coding	ENSG00000143384	0.735465	8.49887	2.24779e-23	5.77211e-22
CTSK	protein_coding	ENSG00000143387	-0.693819	0.807801	4.03984e-06	2.03615e-05
LSP1P4	transcribed_unprocessed_pseudogene	ENSG00000143429	-0.673835	3.89113	3.0739e-15	4.33749e-14
KCNH1	protein_coding	ENSG00000143473	0.883891	-1.20983	0.00196643	0.00579322
KCNN3	protein_coding	ENSG00000143603	1.36467	-0.881548	1.71794e-07	1.06485e-06
HCN3	protein_coding	ENSG00000143630	-0.890623	2.56627	1.89923e-15	2.73115e-14
MAP3K21	protein_coding	ENSG00000143674	-0.638512	2.52465	5.21408e-09	3.96842e-08
ITPKB	protein_coding	ENSG00000143772	-0.928723	2.77652	4.85133e-22	1.1432e-20
WNT9A	protein_coding	ENSG00000143816	0.589109	1.90069	2.76082e-07	1.65959e-06
REN	protein_coding	ENSG00000143839	1.74615	-1.4249	4.66094e-09	3.572e-08
SOX13	protein_coding	ENSG00000143842	0.660623	4.52678	2.03533e-18	3.73951e-17
PPFIA4	protein_coding	ENSG00000143847	-1.3312	3.51206	1.48417e-52	1.27221e-50
PLEKHA6	protein_coding	ENSG00000143850	0.962399	1.86536	1.1692e-17	2.03929e-16
PTPN7	protein_coding	ENSG00000143851	1.53458	3.2342	3.66079e-57	3.68943e-55
RHOB	protein_coding	ENSG00000143878	0.630877	6.12754	1.78686e-21	4.06421e-20
TRIM43B	protein_coding	ENSG00000144010	2.12279	-3.39637	0.00139806	0.00427627
TRIM43	protein_coding	ENSG00000144015	1.49588	-3.25412	0.00939316	0.0232197
ZNF514	protein_coding	ENSG00000144026	-0.821227	3.83695	4.88779e-25	1.37537e-23
ST6GAL2	protein_coding	ENSG00000144057	2.09324	-3.36694	0.000936358	0.00297901
MALL	protein_coding	ENSG00000144063	4.4158	-3.508	1.28102e-06	6.98886e-06
C1QL2	protein_coding	ENSG00000144119	0.884063	-1.13373	0.000999855	0.00316347
NT5DC4	protein_coding	ENSG00000144130	1.33278	-2.99159	0.00644397	0.0165971
SLC20A1	protein_coding	ENSG00000144136	1.70766	9.23334	1.52335e-149	1.01925e-146
LYG1	protein_coding	ENSG00000144214	-0.656333	-0.0210753	0.0042557	0.011488
AFF3	protein_coding	ENSG00000144218	0.935856	4.07708	1.9361e-33	8.19595e-32
NXPH2	protein_coding	ENSG00000144227	-0.887839	1.45758	6.81718e-13	7.73824e-12
GPR17	protein_coding	ENSG00000144230	1.10902	-0.598504	5.9347e-06	2.90578e-05
SCN1A	protein_coding	ENSG00000144285	1.31631	-1.98214	0.00124249	0.00384627
PHOSPHO2	protein_coding	ENSG00000144362	-0.823509	0.590606	1.37363e-07	8.64783e-07
CCDC150	protein_coding	ENSG00000144395	-0.71878	4.12697	5.0427e-18	9.01733e-17
KANSL1L	protein_coding	ENSG00000144445	-1.33559	3.45219	5.66048e-47	3.98667e-45
SPAG16	protein_coding	ENSG00000144451	-0.598755	3.17689	4.0183e-11	3.84083e-10
NYAP2	protein_coding	ENSG00000144460	-0.604638	0.6986	0.00112515	0.00351647
TRPM8	protein_coding	ENSG00000144481	1.02765	0.84491	1.1342e-11	1.15223e-10
HES6	protein_coding	ENSG00000144485	-1.02571	1.87093	5.49219e-19	1.05495e-17
CSRNP1	protein_coding	ENSG00000144655	0.58972	6.10212	9.91366e-16	1.46139e-14
IL17RD	protein_coding	ENSG00000144730	0.623712	3.79965	2.404e-11	2.35482e-10
LIMD1	protein_coding	ENSG00000144791	-0.655817	6.19543	5.76477e-25	1.61273e-23
ZNF660	protein_coding	ENSG00000144792	-0.723648	2.10448	5.5345e-12	5.786e-11
NFKBIZ	protein_coding	ENSG00000144802	0.656883	5.19784	5.57358e-16	8.39592e-15
PHLDB2	protein_coding	ENSG00000144824	0.841674	8.37119	5.13451e-38	2.65968e-36
TAGLN3	protein_coding	ENSG00000144834	2.8889	-1.13407	2.4348e-20	5.13098e-19
RABL3	protein_coding	ENSG00000144840	0.61637	3.68282	1.47948e-11	1.48423e-10
IGSF11	protein_coding	ENSG00000144847	-0.772092	1.3265	2.90507e-08	2.00156e-07
NR1I2	protein_coding	ENSG00000144852	-1.16702	-1.66759	9.0106e-06	4.27325e-05
FAM86B2	protein_coding	ENSG00000145002	0.742339	-1.72563	0.0119461	0.0285888
UCN2	protein_coding	ENSG00000145040	3.39701	2.56284	1.51231e-169	1.51779e-166
EAF2	protein_coding	ENSG00000145088	-0.877997	0.0867397	6.59807e-07	3.76339e-06
ILDR1	protein_coding	ENSG00000145103	4.04851	-3.89234	2.33869e-05	0.000102871
SLIT2	protein_coding	ENSG00000145147	0.640015	4.51914	1.58427e-18	2.93315e-17
VWA5B2	protein_coding	ENSG00000145198	0.754904	2.94869	3.56879e-10	3.08327e-09
LYAR	protein_coding	ENSG00000145220	0.749707	6.14221	1.13609e-22	2.80093e-21
EPHA5	protein_coding	ENSG00000145242	0.736278	3.21918	1.66326e-16	2.6185e-15
SCD5	protein_coding	ENSG00000145284	-0.965672	4.65365	2.58453e-40	1.43772e-38
RNF175	protein_coding	ENSG00000145428	-0.945567	-2.44825	0.00612203	0.0158629
PDGFC	protein_coding	ENSG00000145431	0.598433	4.72687	1.88571e-16	2.95134e-15
NKD2	protein_coding	ENSG00000145506	-0.68795	-0.0578953	0.000450294	0.00153455
ADAMTS16	protein_coding	ENSG00000145536	0.920424	4.14921	3.66835e-29	1.27687e-27
MYO10	protein_coding	ENSG00000145555	0.637113	6.55639	1.71104e-20	3.64725e-19
SSBP2	protein_coding	ENSG00000145687	-0.63282	3.0868	5.1061e-12	5.36374e-11
SPATA9	protein_coding	ENSG00000145757	2.1808	-2.81727	0.000367593	0.00128007
TSLP	protein_coding	ENSG00000145777	-0.766454	0.746002	2.00467e-07	1.22767e-06
TNFAIP8	protein_coding	ENSG00000145779	-0.678286	2.57818	1.57442e-12	1.72377e-11
ARHGAP26	protein_coding	ENSG00000145819	0.601158	4.69864	4.62337e-16	7.00838e-15
C1QTNF2	protein_coding	ENSG00000145861	-0.626728	3.59737	1.09718e-13	1.34561e-12
GABRB2	protein_coding	ENSG00000145864	-0.616567	1.22087	3.75201e-06	1.89743e-05
CPLX2	protein_coding	ENSG00000145920	2.68428	1.78596	1.53085e-91	3.76262e-89
TENM2	protein_coding	ENSG00000145934	0.604794	9.08154	1.04892e-17	1.83482e-16
MYLK4	protein_coding	ENSG00000145949	1.40453	-1.61765	2.83701e-05	0.000123078
PSD2	protein_coding	ENSG00000146005	1.38019	0.832296	4.26875e-20	8.82587e-19
KLHL3	protein_coding	ENSG00000146021	-0.760616	1.24798	3.36035e-08	2.2975e-07
TRIM7	protein_coding	ENSG00000146054	-0.644552	2.19822	1.54963e-08	1.10693e-07
TNFRSF21	protein_coding	ENSG00000146072	0.911186	5.58737	1.47915e-43	9.13546e-42
RASGEF1C	protein_coding	ENSG00000146090	1.10321	3.11199	4.78922e-28	1.58895e-26
FGD2	protein_coding	ENSG00000146192	1.21588	0.0189715	4.37406e-11	4.15778e-10
TTBK1	protein_coding	ENSG00000146216	1.63135	-1.68802	4.09284e-06	2.05985e-05
NFKBIE	protein_coding	ENSG00000146232	1.37558	4.92434	3.04559e-54	2.76827e-52
CYP39A1	protein_coding	ENSG00000146233	-1.1079	0.222483	3.93719e-11	3.76629e-10
MMS22L	protein_coding	ENSG00000146263	-0.698158	4.99003	1.01427e-22	2.51344e-21
PNRC1	protein_coding	ENSG00000146278	-0.875449	3.28366	1.3883e-15	2.02299e-14
RSPO3	protein_coding	ENSG00000146374	0.950142	-1.67003	0.0144323	0.0336656
ARHGAP18	protein_coding	ENSG00000146376	0.644931	4.67656	4.19644e-17	7.02429e-16
SLC2A12	protein_coding	ENSG00000146411	-1.36737	3.2526	4.63574e-06	2.31135e-05
VIP	protein_coding	ENSG00000146469	1.69191	1.63739	5.96484e-33	2.49436e-31
EGFR	protein_coding	ENSG00000146648	0.785991	5.98027	8.40353e-33	3.46603e-31
IGFBP3	protein_coding	ENSG00000146674	1.72302	-2.43177	0.000138575	0.000527796
PSPH	protein_coding	ENSG00000146733	-0.722105	5.16958	1.79809e-26	5.45474e-25
TMEM209	protein_coding	ENSG00000146842	-0.734726	4.22117	6.59891e-21	1.44761e-19
TMEM140	protein_coding	ENSG00000146859	-0.706333	-1.88035	0.0203029	0.0452224
EPHA1	protein_coding	ENSG00000146904	2.8396	-2.46404	2.42899e-08	1.6939e-07
CLTRN	protein_coding	ENSG00000147003	-0.734182	-1.0937	0.00258282	0.00739303
SYTL5	protein_coding	ENSG00000147041	0.587695	5.04336	7.34457e-15	1.00516e-13
CCNB3	protein_coding	ENSG00000147082	0.714081	2.80827	6.97502e-12	7.21062e-11
ZNF157	protein_coding	ENSG00000147117	0.949611	0.688435	1.84341e-08	1.30595e-07
ZNF41	protein_coding	ENSG00000147124	1.06495	4.65983	1.54881e-45	1.04207e-43
ZMYM3	protein_coding	ENSG00000147130	-0.888434	5.60823	5.31634e-34	2.29078e-32
AWAT2	protein_coding	ENSG00000147160	2.40964	-3.8421	0.00976288	0.0240105
IL2RG	protein_coding	ENSG00000147168	2.48094	-1.44235	2.56793e-13	3.038e-12
GCNA	protein_coding	ENSG00000147174	1.85248	3.04303	4.87559e-44	3.05829e-42
HTR2C	protein_coding	ENSG00000147246	-0.950662	-0.382592	8.13081e-06	3.89512e-05
BIN3	protein_coding	ENSG00000147439	0.626831	4.8971	4.6808e-19	9.02694e-18
DOK2	protein_coding	ENSG00000147443	0.980465	-2.36828	0.0112923	0.0272406
RGS20	protein_coding	ENSG00000147509	-0.931812	0.5835	1.2718e-07	8.0573e-07
TRIM55	protein_coding	ENSG00000147573	1.11827	-1.92847	0.0025335	0.00727174
MAL2	protein_coding	ENSG00000147676	0.998833	1.80467	1.96179e-16	3.06444e-15
FAM83A	protein_coding	ENSG00000147689	2.24486	-1.39672	2.94482e-10	2.57279e-09
FAM135B	protein_coding	ENSG00000147724	1.51511	0.452955	1.02004e-15	1.5009e-14
VLDLR	protein_coding	ENSG00000147852	-0.661444	4.6572	3.76875e-20	7.81895e-19
NFIB	protein_coding	ENSG00000147862	-0.77514	5.17275	7.29083e-27	2.26599e-25
CDKN2B	protein_coding	ENSG00000147883	0.77943	2.54028	5.18738e-12	5.44437e-11
NTRK2	protein_coding	ENSG00000148053	0.719666	0.229156	0.000199267	0.000734916
SHC3	protein_coding	ENSG00000148082	-0.695051	-0.710239	0.00460146	0.012326
HMCN2	protein_coding	ENSG00000148357	0.698469	1.43884	4.55502e-06	2.27628e-05
CACNA1B	protein_coding	ENSG00000148408	-1.03733	1.03786	5.06026e-14	6.40833e-13
TMEM236	protein_coding	ENSG00000148483	-0.761783	-0.614252	0.000223971	0.000818013
ZEB1	protein_coding	ENSG00000148516	0.586406	6.47687	7.10696e-18	1.25871e-16
FAM13C	protein_coding	ENSG00000148541	-2.12083	1.69001	7.32203e-63	8.77442e-61
CAMK2G	protein_coding	ENSG00000148660	-0.627897	6.51855	3.95232e-23	9.97898e-22
NPFFR1	protein_coding	ENSG00000148734	0.937566	1.21569	2.24459e-10	1.9877e-09
PPRC1	protein_coding	ENSG00000148840	0.66295	7.05599	7.07749e-24	1.88788e-22
ITPRIP	protein_coding	ENSG00000148841	1.61968	6.47344	1.6058e-101	4.71695e-99
CNNM2	protein_coding	ENSG00000148842	-0.662532	4.34547	6.98236e-17	1.13792e-15
ADM	protein_coding	ENSG00000148926	1.07047	1.18087	3.56351e-11	3.432e-10
SYT8	protein_coding	ENSG00000149043	-0.955771	-0.650795	1.34033e-05	6.17059e-05
PAMR1	protein_coding	ENSG00000149090	-0.737708	-0.856992	0.00307587	0.00864308
SESN3	protein_coding	ENSG00000149212	-0.804561	4.29336	2.04664e-10	1.81708e-09
ST14	protein_coding	ENSG00000149418	0.973613	-0.774119	1.85821e-05	8.31793e-05
PLCH2	protein_coding	ENSG00000149527	1.6481	-0.923492	5.15346e-09	3.92449e-08
MPZL2	protein_coding	ENSG00000149573	-1.20325	-3.01584	0.0033025	0.0091941
KIAA1755	protein_coding	ENSG00000149633	1.24973	1.21007	2.60517e-20	5.48521e-19
DSN1	protein_coding	ENSG00000149636	-0.702746	5.02852	4.48776e-26	1.32797e-24
CABLES2	protein_coding	ENSG00000149679	-0.640268	3.45883	3.37087e-14	4.3373e-13
FERMT3	protein_coding	ENSG00000149781	0.635248	1.28884	1.96017e-05	8.73536e-05
TBX6	protein_coding	ENSG00000149922	-0.892681	-0.243032	1.29532e-05	5.98739e-05
HMGA2	protein_coding	ENSG00000149948	1.32457	6.59199	5.53676e-83	1.16986e-80
MMP3	protein_coding	ENSG00000149968	1.53423	3.8055	1.57931e-29	5.59424e-28
CNKSR2	protein_coding	ENSG00000149970	0.645105	3.55484	1.40069e-14	1.87644e-13
CDH8	protein_coding	ENSG00000150394	-0.838168	0.388697	1.34579e-07	8.48808e-07
KIAA1328	protein_coding	ENSG00000150477	-0.933365	1.54415	7.24412e-14	9.04088e-13
FAM124A	protein_coding	ENSG00000150510	-1.44104	1.04907	3.54675e-25	1.00271e-23
VEGFC	protein_coding	ENSG00000150630	0.97609	4.25533	1.19229e-34	5.33805e-33
CD226	protein_coding	ENSG00000150637	-0.666985	0.117641	7.78392e-05	0.000311914
TEX12	protein_coding	ENSG00000150783	2.5812	-2.1396	1.26042e-07	7.99154e-07
FOXO1	protein_coding	ENSG00000150907	1.40008	4.32567	6.49112e-66	8.88361e-64
DHX37	protein_coding	ENSG00000150990	0.627391	6.32484	6.25786e-20	1.28066e-18
RAD9B	protein_coding	ENSG00000151164	1.38993	-2.01913	0.000527209	0.00176914
NPAS3	protein_coding	ENSG00000151322	2.2591	-1.40006	2.34612e-11	2.29907e-10
THRSP	protein_coding	ENSG00000151365	-1.83207	-3.43808	8.15512e-05	0.000325489
ME3	protein_coding	ENSG00000151376	1.11485	1.67971	9.90102e-19	1.86172e-17
POU4F2	protein_coding	ENSG00000151615	2.72776	-0.0827202	6.34598e-09	4.76929e-08
ANKAR	protein_coding	ENSG00000151687	-0.600023	1.8797	7.45944e-08	4.87322e-07
RNF144A	protein_coding	ENSG00000151692	-0.717649	4.75104	1.95333e-23	5.04287e-22
ASAP2	protein_coding	ENSG00000151693	0.955412	4.52732	7.16249e-40	3.94789e-38
FLI1	protein_coding	ENSG00000151702	4.67128	-1.62578	4.19336e-21	9.31786e-20
TDO2	protein_coding	ENSG00000151790	-1.03419	-0.131766	3.27052e-08	2.23926e-07
SACS	protein_coding	ENSG00000151835	0.620093	7.83179	1.20605e-16	1.9264e-15
CCDC175	protein_coding	ENSG00000151838	-1.10003	-2.91492	0.00993171	0.0243759
PABPC3	protein_coding	ENSG00000151846	-2.36553	-3.00432	0.0130067	0.0307874
CCL28	protein_coding	ENSG00000151882	-0.937445	0.646832	6.00061e-11	5.65259e-10
GFRA1	protein_coding	ENSG00000151892	3.03039	1.57508	3.27569e-88	7.44355e-86
BEND6	protein_coding	ENSG00000151917	-0.610487	0.760467	7.96839e-05	0.000318722
SCHIP1	protein_coding	ENSG00000151967	-0.72484	1.45452	1.32005e-08	9.52835e-08
RABGAP1L	protein_coding	ENSG00000152061	-0.588543	4.19845	7.94864e-15	1.08475e-13
TCF7L1	protein_coding	ENSG00000152284	-0.838856	3.04203	1.37566e-19	2.75211e-18
ZNF776	protein_coding	ENSG00000152443	-0.603645	3.42711	6.58621e-12	6.82919e-11
OLAH	protein_coding	ENSG00000152463	0.664093	1.609	1.94391e-07	1.19507e-06
DMP1	protein_coding	ENSG00000152592	2.46366	-2.49571	6.91723e-06	3.35107e-05
MEPE	protein_coding	ENSG00000152595	3.09667	-2.69235	3.00458e-08	2.06716e-07
CLEC4F	protein_coding	ENSG00000152672	-1.27409	-1.68646	1.40651e-06	7.63029e-06
SLC16A12	protein_coding	ENSG00000152779	-0.598067	1.56773	2.80537e-07	1.68427e-06
PANK1	protein_coding	ENSG00000152782	-1.22151	2.5007	9.4502e-35	4.25471e-33
PRDM8	protein_coding	ENSG00000152784	1.11143	2.7108	3.86206e-26	1.15131e-24
CNTNAP4	protein_coding	ENSG00000152910	-0.597803	1.4338	2.1389e-06	1.12562e-05
MED21	protein_coding	ENSG00000152944	-0.611138	4.74073	5.54787e-15	7.67998e-14
CARHSP1	protein_coding	ENSG00000153048	-0.619411	5.91408	9.33096e-20	1.88237e-18
BMP6	protein_coding	ENSG00000153162	1.26101	3.15622	1.9633e-45	1.31361e-43
PTPRR	protein_coding	ENSG00000153233	0.787731	3.1136	1.53245e-16	2.42206e-15
NR4A2	protein_coding	ENSG00000153234	1.13053	3.97411	4.04231e-07	2.37887e-06
SLC25A27	protein_coding	ENSG00000153291	-0.860947	3.09016	5.73735e-20	1.17613e-18
ADGRF4	protein_coding	ENSG00000153294	1.47761	0.0390866	1.19898e-13	1.46449e-12
ADPRHL1	protein_coding	ENSG00000153531	1.85925	4.56634	1.55082e-50	1.24515e-48
FBXL2	protein_coding	ENSG00000153558	-0.614556	3.0439	1.69736e-11	1.69364e-10
GOLGA8F	protein_coding	ENSG00000153684	1.4086	-2.21704	0.000438285	0.00149723
PTPRD	protein_coding	ENSG00000153707	0.827931	-1.98584	0.0151704	0.0351694
LURAP1L	protein_coding	ENSG00000153714	-2.39436	0.783769	7.7442e-49	5.81105e-47
PID1	protein_coding	ENSG00000153823	-0.720218	4.21089	5.50955e-22	1.2922e-20
ANKFN1	protein_coding	ENSG00000153930	-0.642962	0.72554	9.88139e-06	4.65597e-05
HS3ST3A1	protein_coding	ENSG00000153976	2.3287	-1.04424	3.95829e-13	4.60374e-12
GDPD1	protein_coding	ENSG00000153982	-1.18769	1.52018	3.83937e-21	8.56287e-20
GRAP	protein_coding	ENSG00000154016	1.34339	-1.85215	0.000133185	0.000508647
ANKRD29	protein_coding	ENSG00000154065	-0.682275	0.849897	2.1617e-05	9.55568e-05
CHST9	protein_coding	ENSG00000154080	-0.786619	-1.38269	0.0039509	0.0107641
ROBO4	protein_coding	ENSG00000154133	0.833627	2.25526	2.97603e-14	3.83951e-13
C4orf19	protein_coding	ENSG00000154274	-0.743428	2.80156	2.80401e-15	3.97529e-14
FAM167A	protein_coding	ENSG00000154319	1.28624	3.29438	4.45287e-43	2.68141e-41
PGM5	protein_coding	ENSG00000154330	-0.627835	3.1017	1.6953e-13	2.04071e-12
GBP5	protein_coding	ENSG00000154451	3.91464	-2.18932	4.21018e-08	2.84143e-07
CEP170P1	transcribed_unprocessed_pseudogene	ENSG00000154608	0.750675	-0.301547	0.00129063	0.0039774
PDE1C	protein_coding	ENSG00000154678	0.764891	5.09394	7.73905e-27	2.3991e-25
SLFN13	protein_coding	ENSG00000154760	-1.06251	1.87791	1.11932e-20	2.41804e-19
WNT7A	protein_coding	ENSG00000154764	0.886813	2.12481	3.71222e-15	5.19559e-14
FGD5	protein_coding	ENSG00000154783	1.01653	3.8862	1.04902e-32	4.31191e-31
SKA1	protein_coding	ENSG00000154839	-0.587268	5.15115	5.95978e-17	9.77217e-16
RAB6B	protein_coding	ENSG00000154917	-0.834514	4.06294	1.76376e-28	5.92519e-27
DKK2	protein_coding	ENSG00000155011	0.914133	1.96379	8.4076e-16	1.24777e-14
KLF10	protein_coding	ENSG00000155090	1.11878	6.84332	8.52397e-52	7.05556e-50
GOLGA7B	protein_coding	ENSG00000155265	0.957852	-1.32882	0.00316904	0.008867
GRAMD2B	protein_coding	ENSG00000155324	0.700909	3.47267	1.18827e-15	1.74417e-14
C16orf87	protein_coding	ENSG00000155330	-0.731539	3.27437	1.68072e-15	2.42561e-14
TTN	protein_coding	ENSG00000155657	1.47989	-1.80021	2.73508e-05	0.000118895
DEPTOR	protein_coding	ENSG00000155792	-0.943588	-0.00318818	1.40803e-07	8.84822e-07
FMN2	protein_coding	ENSG00000155816	1.90424	-0.267119	1.02066e-14	1.38193e-13
LSM11	protein_coding	ENSG00000155858	-0.75481	3.36916	1.09656e-17	1.91535e-16
ADCY8	protein_coding	ENSG00000155897	2.33058	1.99329	9.37841e-79	1.82176e-76
SLA	protein_coding	ENSG00000155926	1.88173	0.388238	4.97757e-27	1.5591e-25
KIF5A	protein_coding	ENSG00000155980	-0.678757	3.97076	6.6849e-17	1.0924e-15
MCU	protein_coding	ENSG00000156026	-0.625823	5.43138	5.06365e-19	9.74965e-18
GNAQ	protein_coding	ENSG00000156052	-0.699429	2.67957	6.21554e-12	6.46433e-11
N6AMT1	protein_coding	ENSG00000156239	-0.686293	4.21734	3.2089e-19	6.28908e-18
RPGR	protein_coding	ENSG00000156313	0.622548	4.41825	3.36783e-15	4.7356e-14
FGF18	protein_coding	ENSG00000156427	0.69917	-0.418157	0.00557811	0.0146155
PCDH1	protein_coding	ENSG00000156453	0.593036	2.68921	4.36441e-08	2.93729e-07
RAB11FIP1	protein_coding	ENSG00000156675	-0.807559	6.20912	6.9193e-33	2.8785e-31
GLYATL2	protein_coding	ENSG00000156689	-0.603415	-0.246158	0.00216707	0.00630414
MAPK13	protein_coding	ENSG00000156711	0.649946	0.545388	0.000928153	0.00295602
MS4A1	protein_coding	ENSG00000156738	2.02401	-2.85503	0.00121484	0.00377184
FBXO32	protein_coding	ENSG00000156804	2.15808	4.44732	1.16893e-150	8.04459e-148
FRRS1	protein_coding	ENSG00000156869	-0.834986	3.16866	1.82647e-20	3.87956e-19
ITGAD	protein_coding	ENSG00000156886	1.16196	-3.23243	0.020247	0.045123
ADGRG4	protein_coding	ENSG00000156920	0.599383	0.667219	0.000266458	0.000956222
B3GNT7	protein_coding	ENSG00000156966	1.76742	-2.07884	2.25776e-05	9.95291e-05
MPV17L	protein_coding	ENSG00000156968	2.82053	-4.09143	0.00154663	0.00467247
EIF4A2	protein_coding	ENSG00000156976	0.738581	8.38043	1.94738e-29	6.85767e-28
GHRL	protein_coding	ENSG00000157017	1.39486	-2.8212	0.0104994	0.0255582
ATP2B2	protein_coding	ENSG00000157087	1.09991	0.819824	3.83568e-11	3.67502e-10
SYN2	protein_coding	ENSG00000157152	-0.815534	1.73971	6.24059e-13	7.11729e-12
NRG1	protein_coding	ENSG00000157168	1.28569	5.1541	1.5588e-50	1.2474e-48
FUK	protein_coding	ENSG00000157353	-0.87477	2.39078	5.18062e-14	6.55042e-13
IL34	protein_coding	ENSG00000157368	1.94561	-2.99834	0.000735453	0.00239067
MUM1L1	protein_coding	ENSG00000157502	0.72713	2.48216	2.29601e-12	2.48222e-11
TSC22D3	protein_coding	ENSG00000157514	-1.16832	2.40884	1.78867e-28	6.00052e-27
KCNJ15	protein_coding	ENSG00000157551	3.09612	1.10995	2.76734e-70	4.32837e-68
ETS2	protein_coding	ENSG00000157557	0.995594	5.09039	3.86337e-34	1.6767e-32
DGKI	protein_coding	ENSG00000157680	1.24572	3.47205	6.84229e-48	4.99425e-46
DPYSL5	protein_coding	ENSG00000157851	-0.834911	2.80122	8.7628e-19	1.65156e-17
TNFRSF14	protein_coding	ENSG00000157873	-0.773659	0.962766	4.19165e-07	2.46134e-06
LDLRAP1	protein_coding	ENSG00000157978	-0.986844	4.84875	6.54238e-47	4.59435e-45
ANKRD61	protein_coding	ENSG00000157999	1.06384	-0.935632	0.00124301	0.00384689
DUSP2	protein_coding	ENSG00000158050	1.08411	3.77692	1.84656e-07	1.13988e-06
GRHL3	protein_coding	ENSG00000158055	-1.77041	-0.435364	5.6016e-18	9.97971e-17
PTPDC1	protein_coding	ENSG00000158079	-0.891019	3.66786	1.17317e-25	3.40459e-24
RHPN1	protein_coding	ENSG00000158106	-0.643131	4.34019	3.61527e-12	3.85997e-11
XDH	protein_coding	ENSG00000158125	0.828325	3.93175	1.39096e-26	4.2464e-25
XKR8	protein_coding	ENSG00000158156	-1.8634	-0.449326	1.93288e-19	3.82873e-18
ESYT3	protein_coding	ENSG00000158220	-0.691511	1.4329	3.44035e-08	2.35019e-07
TENT5B	protein_coding	ENSG00000158246	-0.953265	4.06416	3.07355e-31	1.17326e-29
HIST1H2BD	protein_coding	ENSG00000158373	1.21457	4.70651	5.167e-47	3.64978e-45
HIST1H4H	protein_coding	ENSG00000158406	1.77116	3.89974	4.80922e-67	6.8141e-65
DNAH3	protein_coding	ENSG00000158486	3.57337	2.12994	2.61302e-107	8.62188e-105
PKD1L1	protein_coding	ENSG00000158683	0.663614	2.24697	9.15497e-09	6.7436e-08
SLAMF8	protein_coding	ENSG00000158714	2.21873	-1.83608	7.83281e-08	5.09916e-07
EDA	protein_coding	ENSG00000158813	-1.18943	2.65462	1.45358e-31	5.63806e-30
VWA5B1	protein_coding	ENSG00000158816	2.10425	-2.50701	2.73497e-06	1.41824e-05
ADAMTS4	protein_coding	ENSG00000158859	2.30303	-3.65806	0.0128171	0.0303961
MPZ	protein_coding	ENSG00000158887	0.652263	1.71829	1.99646e-07	1.22425e-06
EPB41	protein_coding	ENSG00000159023	-0.759754	5.37442	2.29341e-27	7.32646e-26
STC1	protein_coding	ENSG00000159167	2.45955	4.89017	4.5222e-85	9.90239e-83
HOXB13	protein_coding	ENSG00000159184	-0.981985	3.02164	2.05579e-23	5.29038e-22
RUNX1	protein_coding	ENSG00000159216	0.609717	7.27559	3.18933e-20	6.66852e-19
ACTC1	protein_coding	ENSG00000159251	1.67901	-0.952483	8.60444e-10	7.16155e-09
CHAF1B	protein_coding	ENSG00000159259	-0.588555	4.7442	8.76896e-16	1.29821e-14
CLDN14	protein_coding	ENSG00000159261	2.73602	-3.09815	2.22113e-05	9.79682e-05
GOLGA6A	protein_coding	ENSG00000159289	3.24575	-1.44137	9.32985e-22	2.15257e-20
M1AP	protein_coding	ENSG00000159374	1.45325	-3.45592	0.0217965	0.0480473
BTG2	protein_coding	ENSG00000159388	-1.85334	5.44938	3.0476e-152	2.22447e-149
HK2	protein_coding	ENSG00000159399	0.638241	6.5571	1.69943e-13	2.04466e-12
FAM131B	protein_coding	ENSG00000159784	1.00669	2.06417	7.21983e-19	1.37257e-17
ZYX	protein_coding	ENSG00000159840	0.663722	7.79757	2.10516e-24	5.75561e-23
ZNF235	protein_coding	ENSG00000159917	-0.619198	2.08985	5.35365e-08	3.5652e-07
GNE	protein_coding	ENSG00000159921	-0.742751	5.44302	1.74006e-28	5.85374e-27
PTGIR	protein_coding	ENSG00000160013	1.22708	0.223153	3.28206e-11	3.17383e-10
ZNF362	protein_coding	ENSG00000160094	-0.642276	3.14176	3.84967e-13	4.48173e-12
PDE9A	protein_coding	ENSG00000160191	0.618016	2.38297	1.10342e-09	9.04324e-09
PKNOX1	protein_coding	ENSG00000160199	1.02784	4.98923	3.32166e-44	2.11105e-42
HSF2BP	protein_coding	ENSG00000160207	0.813127	2.01039	9.47965e-13	1.06351e-11
RRP1B	protein_coding	ENSG00000160208	0.70518	7.16151	2.82239e-27	8.91153e-26
RRP1	protein_coding	ENSG00000160214	0.709552	6.2037	2.14276e-27	6.86338e-26
GAB3	protein_coding	ENSG00000160219	-1.15493	1.82875	1.75983e-23	4.56286e-22
C21orf58	protein_coding	ENSG00000160298	-0.617592	4.68314	1.49972e-15	2.17614e-14
CLDND2	protein_coding	ENSG00000160318	-0.685317	0.217158	0.000122779	0.000472801
CFAP157	protein_coding	ENSG00000160401	-1.31843	-2.39273	0.000195715	0.000723035
COX6B2	protein_coding	ENSG00000160471	1.64526	-1.86148	0.000868635	0.00278101
TMEM190	protein_coding	ENSG00000160472	2.00312	-1.03564	2.14526e-08	1.50814e-07
MPZL3	protein_coding	ENSG00000160588	0.633129	1.0022	1.66362e-05	7.51108e-05
IL6R	protein_coding	ENSG00000160712	0.606072	3.47498	2.09481e-12	2.26878e-11
CHRNB2	protein_coding	ENSG00000160716	0.722799	-0.700628	0.00335154	0.00931555
LRRC71	protein_coding	ENSG00000160838	0.760738	-0.545564	0.000414792	0.00142405
TONSL	protein_coding	ENSG00000160949	-0.635846	6.99108	1.88191e-19	3.74005e-18
COL26A1	protein_coding	ENSG00000160963	0.897748	1.02972	2.58673e-07	1.5604e-06
FBXL13	protein_coding	ENSG00000161040	0.646996	3.31522	1.37818e-13	1.67319e-12
TUBA3FP	processed_transcript	ENSG00000161149	-1.0027	-1.41701	0.000181307	0.000674461
U2AF1L4	protein_coding	ENSG00000161265	-0.877663	-0.330333	5.70816e-05	0.000233791
NPHS1	protein_coding	ENSG00000161270	2.51294	-4.03892	0.00879669	0.0219072
THAP8	protein_coding	ENSG00000161277	-1.24165	1.32779	1.65721e-19	3.3044e-18
GRIN2C	protein_coding	ENSG00000161509	-1.90999	1.6043	3.44827e-37	1.74493e-35
ZNF577	protein_coding	ENSG00000161551	-0.6948	3.7092	7.88668e-17	1.27323e-15
KLHL10	protein_coding	ENSG00000161594	2.00473	-2.16339	1.02631e-06	5.68683e-06
FAM171A2	protein_coding	ENSG00000161682	-0.779216	3.74577	5.24053e-19	1.00741e-17
SYCE2	protein_coding	ENSG00000161860	0.618633	0.436839	0.000424251	0.00145279
SPC24	protein_coding	ENSG00000161888	-0.785885	4.38394	3.39051e-25	9.59661e-24
BCL6B	protein_coding	ENSG00000161940	1.68595	-2.46232	0.000168743	0.000632117
FGF11	protein_coding	ENSG00000161958	-0.652578	1.39532	6.563e-07	3.74515e-06
EIF4A1	protein_coding	ENSG00000161960	0.610146	1.83189	0.000273246	0.00097796
PRR35	protein_coding	ENSG00000161992	-0.856737	-2.40881	0.014249	0.0333089
HS3ST6	protein_coding	ENSG00000162040	-0.861328	-1.95142	0.0198997	0.0444849
TEDC2	protein_coding	ENSG00000162062	-0.871807	4.22807	5.16411e-29	1.77951e-27
TBC1D24	protein_coding	ENSG00000162065	-0.640308	4.53884	5.78892e-17	9.51143e-16
AMDHD2	protein_coding	ENSG00000162066	-0.843602	4.24406	2.11804e-25	6.05906e-24
NTN3	protein_coding	ENSG00000162068	-0.893016	-1.44711	0.00427799	0.0115378
BICDL2	protein_coding	ENSG00000162069	1.74294	-3.31406	0.00556895	0.0145962
ZG16B	protein_coding	ENSG00000162078	1.12597	-0.190105	1.91395e-08	1.35354e-07
ADCY9	protein_coding	ENSG00000162104	-0.669776	4.27137	1.33936e-18	2.49507e-17
ITIH3	protein_coding	ENSG00000162267	0.616202	-0.755911	0.01031	0.0251634
KLHL21	protein_coding	ENSG00000162413	0.844196	4.99123	9.47428e-31	3.5491e-29
ZSWIM5	protein_coding	ENSG00000162415	-1.09179	-0.503827	6.69033e-08	4.3946e-07
SLC45A1	protein_coding	ENSG00000162426	0.658458	-0.643626	0.00932029	0.0230609
RAVER2	protein_coding	ENSG00000162437	-0.878842	4.54239	1.6525e-34	7.34386e-33
FBLIM1	protein_coding	ENSG00000162458	0.630818	2.53584	3.76496e-09	2.91784e-08
SLC25A34	protein_coding	ENSG00000162461	-1.14365	0.737235	3.85401e-08	2.61056e-07
LRRC38	protein_coding	ENSG00000162494	2.0979	1.83559	1.15244e-64	1.47654e-62
DHRS3	protein_coding	ENSG00000162496	-0.795799	0.482285	1.42143e-06	7.70086e-06
MATN1	protein_coding	ENSG00000162510	1.80078	0.4044	5.83311e-22	1.36542e-20
LAPTM5	protein_coding	ENSG00000162511	0.820531	1.52739	4.20006e-10	3.60795e-09
UBXN10	protein_coding	ENSG00000162543	1.61631	-2.72177	0.00108075	0.00339004
CAMK2N1	protein_coding	ENSG00000162545	0.585182	6.51252	2.75092e-20	5.78196e-19
ALPL	protein_coding	ENSG00000162551	0.77136	4.25037	8.1979e-24	2.16516e-22
SCNN1D	protein_coding	ENSG00000162572	-0.765999	0.782341	2.42858e-06	1.26727e-05
IL23R	protein_coding	ENSG00000162594	3.32544	-4.13922	0.00476935	0.012722
DIRAS3	protein_coding	ENSG00000162595	2.80451	-0.150587	1.39581e-31	5.42274e-30
NFIA	protein_coding	ENSG00000162599	-0.661362	3.63136	1.36001e-14	1.82296e-13
OMA1	protein_coding	ENSG00000162600	-0.789481	2.36127	4.37708e-13	5.06635e-12
ADGRL4	protein_coding	ENSG00000162618	0.849769	3.53897	5.22111e-23	1.30728e-21
WDR63	protein_coding	ENSG00000162643	-1.46063	-0.41522	9.72808e-13	1.09037e-11
KCNT2	protein_coding	ENSG00000162687	-0.828653	0.570072	2.30045e-08	1.61172e-07
VCAM1	protein_coding	ENSG00000162692	5.66165	-1.13497	7.21806e-33	2.99761e-31
SLC30A7	protein_coding	ENSG00000162695	0.682323	5.39371	1.18952e-24	3.27451e-23
NLRP3	protein_coding	ENSG00000162711	1.14592	3.88454	7.24398e-30	2.60816e-28
SLAMF9	protein_coding	ENSG00000162723	0.816985	-0.895527	0.00102245	0.00322776
DDR2	protein_coding	ENSG00000162733	-0.710202	6.22476	1.36673e-28	4.61717e-27
FCRLB	protein_coding	ENSG00000162746	1.24847	1.23351	3.50681e-18	6.33197e-17
ATF3	protein_coding	ENSG00000162772	-1.20755	4.92204	6.00537e-20	1.23003e-18
TDRD5	protein_coding	ENSG00000162782	-0.970146	1.43846	1.4394e-14	1.92615e-13
SNED1	protein_coding	ENSG00000162804	0.75885	1.30534	6.43395e-08	4.23659e-07
TFB2M	protein_coding	ENSG00000162851	0.753088	4.79607	1.08802e-22	2.69067e-21
KLHDC8A	protein_coding	ENSG00000162873	2.00329	2.74256	2.75257e-81	5.57152e-79
PKDCC	protein_coding	ENSG00000162878	-0.806764	3.14807	4.33438e-17	7.22507e-16
IL24	protein_coding	ENSG00000162892	3.45851	4.90559	3.35012e-113	1.22264e-110
PIGR	protein_coding	ENSG00000162896	1.16591	-2.91388	0.0155021	0.0358506
KCNF1	protein_coding	ENSG00000162975	2.31175	2.09104	9.35601e-87	2.10615e-84
FAM84A	protein_coding	ENSG00000162981	-1.06944	1.4426	3.96641e-17	6.65777e-16
KCNJ3	protein_coding	ENSG00000162989	-1.4334	-2.35572	0.00143315	0.00437075
PRORSD1P	transcribed_unitary_pseudogene	ENSG00000162997	-0.664001	0.304436	3.65457e-05	0.000155224
DUSP19	protein_coding	ENSG00000162999	-0.59202	0.785578	0.000181663	0.000675472
SLC16A14	protein_coding	ENSG00000163053	1.75339	1.59564	3.68497e-42	2.14396e-40
SGPP2	protein_coding	ENSG00000163082	2.66754	-0.795377	3.0432e-23	7.78149e-22
INHBB	protein_coding	ENSG00000163083	1.26816	-2.53741	0.00993025	0.0243748
XIRP2	protein_coding	ENSG00000163092	0.823322	0.124416	9.91244e-05	0.000388672
ANKRD23	protein_coding	ENSG00000163126	-0.592841	-0.723624	0.0162818	0.0374362
CTSS	protein_coding	ENSG00000163131	1.63673	-0.10436	8.57282e-14	1.06112e-12
IVL	protein_coding	ENSG00000163207	1.21212	-0.0554312	1.181e-08	8.57092e-08
ARHGAP25	protein_coding	ENSG00000163219	2.07057	3.13176	1.86143e-56	1.83755e-54
TGFA	protein_coding	ENSG00000163235	1.82857	5.27432	3.6223e-157	2.90834e-154
DCAF16	protein_coding	ENSG00000163257	-0.618848	5.54935	2.78872e-21	6.2895e-20
NPPC	protein_coding	ENSG00000163273	1.3149	-2.52379	0.00353225	0.00976548
GABRG1	protein_coding	ENSG00000163285	-0.766691	1.58491	4.66087e-09	3.572e-08
NIPAL1	protein_coding	ENSG00000163293	0.651597	5.51769	1.58426e-19	3.16681e-18
ANTXR2	protein_coding	ENSG00000163297	1.59566	6.35076	7.2726e-120	2.91959e-117
GPR155	protein_coding	ENSG00000163328	-0.807555	2.52805	1.21973e-16	1.94566e-15
CLDN1	protein_coding	ENSG00000163347	0.844352	5.69236	6.47159e-37	3.24752e-35
COL6A3	protein_coding	ENSG00000163359	1.17832	9.55373	4.19437e-65	5.46107e-63
IGFN1	protein_coding	ENSG00000163395	4.28547	1.22483	6.55911e-79	1.28447e-76
SLC15A2	protein_coding	ENSG00000163406	-1.07373	-0.897386	6.53811e-06	3.17956e-05
TMEM169	protein_coding	ENSG00000163449	1.07117	0.0152714	1.1823e-07	7.52789e-07
TMEM79	protein_coding	ENSG00000163472	-0.694062	2.56837	2.33362e-12	2.52062e-11
ADORA1	protein_coding	ENSG00000163485	-0.928409	3.66924	6.94327e-29	2.37898e-27
NEK10	protein_coding	ENSG00000163491	-1.0807	3.33241	5.08953e-34	2.19698e-32
FEV	protein_coding	ENSG00000163497	1.60551	-1.64908	2.03176e-06	1.07346e-05
CRYBA2	protein_coding	ENSG00000163499	1.46708	-3.10407	0.00641379	0.01653
TGFBR2	protein_coding	ENSG00000163513	0.715361	7.46721	1.08175e-28	3.67505e-27
HDAC11	protein_coding	ENSG00000163517	-0.629074	3.83305	1.00211e-12	1.12008e-11
AIM2	protein_coding	ENSG00000163568	3.14935	-3.84344	0.0079775	0.0200956
EIF5A2	protein_coding	ENSG00000163577	0.592196	4.80472	3.82956e-12	4.06893e-11
CTLA4	protein_coding	ENSG00000163599	1.00786	-1.04465	6.31302e-05	0.000256601
PTPN13	protein_coding	ENSG00000163629	-1.01616	5.36482	2.20616e-43	1.34872e-41
C4orf36	protein_coding	ENSG00000163633	-1.18039	-3.09738	0.00922273	0.0228359
ATXN7	protein_coding	ENSG00000163635	0.785899	0.922224	3.28731e-06	1.67971e-05
ADAMTS9	protein_coding	ENSG00000163638	1.30839	2.49621	6.01208e-28	1.98646e-26
PTX3	protein_coding	ENSG00000163661	2.08484	5.10137	7.30811e-21	1.60028e-19
DCLK3	protein_coding	ENSG00000163673	-0.821513	0.865528	6.06898e-09	4.57538e-08
SMIM14	protein_coding	ENSG00000163683	0.657969	2.33808	4.3553e-08	2.93245e-07
RBM47	protein_coding	ENSG00000163694	-0.625992	1.39089	0.00330465	0.00919903
IL17RE	protein_coding	ENSG00000163701	0.795693	-0.543252	0.000194724	0.000719816
CXCL3	protein_coding	ENSG00000163734	2.69979	1.09861	1.12295e-40	6.27577e-39
TM4SF18	protein_coding	ENSG00000163762	0.60895	-0.329567	0.0136312	0.0320795
ZNF513	protein_coding	ENSG00000163795	1.10508	2.14596	3.70515e-22	8.80136e-21
WDR43	protein_coding	ENSG00000163811	0.621326	7.66734	2.36462e-19	4.66857e-18
CDCP1	protein_coding	ENSG00000163814	3.37283	1.57648	1.08108e-95	2.86154e-93
CCR1	protein_coding	ENSG00000163823	2.18973	-1.90635	8.30484e-06	3.96981e-05
LRRC2	protein_coding	ENSG00000163827	1.29798	0.590554	4.32449e-12	4.57662e-11
DTX3L	protein_coding	ENSG00000163840	-1.0042	5.64106	3.81596e-51	3.12636e-49
NMNAT3	protein_coding	ENSG00000163864	-1.36209	-0.853134	7.57362e-09	5.65837e-08
ZC3H12A	protein_coding	ENSG00000163874	1.10215	4.19295	1.36401e-44	8.83197e-43
DNALI1	protein_coding	ENSG00000163879	0.87423	-1.40891	0.00244196	0.00702909
HEYL	protein_coding	ENSG00000163909	3.62126	-3.62291	1.33262e-05	6.13977e-05
RFC4	protein_coding	ENSG00000163918	-0.772309	5.47284	2.47471e-30	9.11443e-29
PRKCD	protein_coding	ENSG00000163932	1.05187	5.25827	1.60669e-52	1.37235e-50
OTOP1	protein_coding	ENSG00000163982	6.55177	-4.06799	3.27781e-05	0.000140535
ABLIM2	protein_coding	ENSG00000163995	1.02865	1.03696	5.35128e-12	5.60419e-11
BSN	protein_coding	ENSG00000164061	-0.966601	-0.5821	1.47898e-05	6.74956e-05
MST1R	protein_coding	ENSG00000164078	1.30499	-0.143642	6.5625e-10	5.5274e-09
DUSP7	protein_coding	ENSG00000164086	0.664963	6.33365	1.43826e-24	3.94572e-23
SAP30	protein_coding	ENSG00000164105	-0.631382	4.02256	3.7944e-14	4.85889e-13
HAND2	protein_coding	ENSG00000164107	-1.00193	1.19656	9.85947e-13	1.10407e-11
TMEM155	protein_coding	ENSG00000164112	1.74298	-2.94533	0.00420523	0.0113747
ASB5	protein_coding	ENSG00000164122	1.75566	-1.32999	1.12145e-07	7.16508e-07
NPY1R	protein_coding	ENSG00000164128	-0.87283	0.101294	2.34085e-05	0.000102947
HHIP	protein_coding	ENSG00000164161	1.39043	2.87103	6.8534e-44	4.28773e-42
ITGA2	protein_coding	ENSG00000164171	1.42515	7.04378	5.55651e-100	1.61252e-97
RANBP3L	protein_coding	ENSG00000164188	1.95095	-3.61948	0.004202	0.0113672
F2RL2	protein_coding	ENSG00000164220	-0.909848	5.26588	2.75454e-43	1.67547e-41
ANKRD33B	protein_coding	ENSG00000164236	-0.798262	5.46169	5.94144e-18	1.05773e-16
C5orf63	protein_coding	ENSG00000164241	-0.659239	3.18471	5.52886e-14	6.96151e-13
SPINK1	protein_coding	ENSG00000164266	-2.36761	-4.05826	0.00103831	0.00327268
ESM1	protein_coding	ENSG00000164283	2.38051	5.07486	1.31424e-145	7.53717e-143
GPX8	protein_coding	ENSG00000164294	-0.963164	6.78534	5.41711e-49	4.10321e-47
PRIMPOL	protein_coding	ENSG00000164306	-0.63403	3.27584	1.20601e-13	1.47159e-12
TLR3	protein_coding	ENSG00000164342	-1.32735	1.45306	2.7081e-24	7.33747e-23
LINC01600	lincRNA	ENSG00000164385	-0.968729	-1.2159	0.00146304	0.00445064
ADGRF2	protein_coding	ENSG00000164393	-2.17665	-3.32746	0.000379755	0.0013169
CSF2	protein_coding	ENSG00000164400	3.9626	2.90987	7.60343e-147	4.5786e-144
SAMD3	protein_coding	ENSG00000164483	1.28238	-0.415751	2.98784e-09	2.34043e-08
TMEM200A	protein_coding	ENSG00000164484	1.3048	5.2161	2.63881e-81	5.38653e-79
STXBP5	protein_coding	ENSG00000164506	-0.774491	4.95872	1.17614e-26	3.61349e-25
RAET1E	protein_coding	ENSG00000164520	1.06923	1.9679	2.2507e-17	3.82858e-16
PI16	protein_coding	ENSG00000164530	1.23132	-0.488385	2.59469e-08	1.80059e-07
DAGLB	protein_coding	ENSG00000164535	-1.09093	5.89861	1.64156e-58	1.71914e-56
KIAA0895	protein_coding	ENSG00000164542	-1.10738	2.82998	1.61397e-32	6.60029e-31
CDCA7L	protein_coding	ENSG00000164649	-0.800626	6.05841	1.14463e-30	4.27451e-29
COL1A2	protein_coding	ENSG00000164692	1.13074	-0.461891	4.66188e-07	2.71824e-06
SOX17	protein_coding	ENSG00000164736	0.846647	3.24396	3.31836e-17	5.58555e-16
C7orf57	protein_coding	ENSG00000164746	2.55156	2.16357	4.4765e-95	1.17202e-92
PEX2	protein_coding	ENSG00000164751	-0.8043	4.91243	6.90394e-28	2.2749e-26
TNFRSF11B	protein_coding	ENSG00000164761	1.49303	5.10582	4.12864e-103	1.27496e-100
KCNV1	protein_coding	ENSG00000164794	1.32024	0.771565	5.16044e-14	6.52833e-13
CSMD3	protein_coding	ENSG00000164796	-1.03347	3.82527	1.25844e-39	6.88912e-38
UNCX	protein_coding	ENSG00000164853	3.82551	-0.599055	4.35851e-32	1.74681e-30
TMEM184A	protein_coding	ENSG00000164855	0.992551	4.62069	4.3787e-38	2.28289e-36
DCSTAMP	protein_coding	ENSG00000164935	7.04026	-1.10008	8.51548e-36	4.06163e-34
TP53INP1	protein_coding	ENSG00000164938	-2.00318	4.2783	1.6978e-121	7.05085e-119
INTS8	protein_coding	ENSG00000164941	-0.698858	5.0347	1.14958e-22	2.83129e-21
GEM	protein_coding	ENSG00000164949	1.47693	5.01507	7.37988e-21	1.61194e-19
TMEM71	protein_coding	ENSG00000165071	0.640415	1.61903	0.00119902	0.00372751
GKAP1	protein_coding	ENSG00000165113	-1.19041	3.13513	1.36662e-39	7.46433e-38
AL353743.1	transcribed_unprocessed_pseudogene	ENSG00000165121	-0.756241	2.09048	1.32139e-10	1.19836e-09
TMEM246	protein_coding	ENSG00000165152	-0.75538	4.05558	2.57683e-22	6.20061e-21
CFAP47	protein_coding	ENSG00000165164	-0.955043	-2.02939	0.0086198	0.0215138
CYBB	protein_coding	ENSG00000165168	0.934774	-2.14396	0.0091865	0.0227609
PTCHD1	protein_coding	ENSG00000165186	6.31776	-4.09119	0.000245476	0.000888071
WNK2	protein_coding	ENSG00000165238	-0.773983	3.40462	3.9266e-16	5.99367e-15
NOL6	protein_coding	ENSG00000165271	0.679373	7.12462	3.18211e-25	9.01735e-24
AQP3	protein_coding	ENSG00000165272	2.14989	3.45677	2.62274e-134	1.28926e-131
ARMC3	protein_coding	ENSG00000165309	-0.809342	-1.87289	0.0123869	0.0295029
DEUP1	protein_coding	ENSG00000165325	-0.841152	-1.13636	0.000580817	0.00192941
LRFN5	protein_coding	ENSG00000165379	1.86957	0.213055	4.79643e-17	7.9622e-16
GTF2A1	protein_coding	ENSG00000165417	0.662672	5.85808	1.20041e-20	2.58625e-19
PGM2L1	protein_coding	ENSG00000165434	0.810436	5.46837	3.19863e-30	1.17627e-28
SLC16A9	protein_coding	ENSG00000165449	1.60681	1.72623	3.43676e-32	1.39362e-30
HEPACAM	protein_coding	ENSG00000165478	3.06119	-3.64665	2.51607e-05	0.00011013
C10orf25	antisense	ENSG00000165511	0.634678	2.02215	7.61876e-08	4.96921e-07
DRGX	protein_coding	ENSG00000165606	1.10999	-2.1298	0.00725875	0.0184724
DACT1	protein_coding	ENSG00000165617	-1.17422	4.30864	2.54806e-54	2.32481e-52
OXGR1	protein_coding	ENSG00000165621	0.853508	0.666897	2.17079e-07	1.32374e-06
SNAPC4	protein_coding	ENSG00000165684	0.696934	5.7373	9.12245e-20	1.84185e-18
TMEM52B	protein_coding	ENSG00000165685	2.62661	-1.18028	2.92254e-16	4.50385e-15
GFI1B	protein_coding	ENSG00000165702	1.68229	-2.41337	0.000700474	0.00228591
RET	protein_coding	ENSG00000165731	-0.655276	-0.553383	0.000930495	0.00296192
DDX21	protein_coding	ENSG00000165732	0.747831	9.40948	2.33706e-23	5.98859e-22
JCAD	protein_coding	ENSG00000165757	0.689859	4.55385	8.47693e-19	1.60019e-17
RNASE7	protein_coding	ENSG00000165799	2.55239	-0.761135	7.6122e-17	1.23057e-15
ARHGEF40	protein_coding	ENSG00000165801	0.668709	7.12196	4.6508e-25	1.31022e-23
C12orf50	protein_coding	ENSG00000165805	5.75114	-3.94588	0.00032121	0.00113213
PPP1R36	protein_coding	ENSG00000165807	1.16923	-1.98552	0.00143641	0.00437793
VWA2	protein_coding	ENSG00000165816	1.73846	-1.89638	2.16152e-06	1.13579e-05
SHLD2P1	transcribed_unprocessed_pseudogene	ENSG00000165874	-0.900529	-1.658	0.00595155	0.0154561
MOAP1	protein_coding	ENSG00000165943	-0.604471	3.40795	1.30936e-11	1.32127e-10
CLMN	protein_coding	ENSG00000165959	-1.06453	3.51058	8.94723e-36	4.25073e-34
SLC6A5	protein_coding	ENSG00000165970	6.87012	-4.0719	2.63089e-06	1.3678e-05
CACNB2	protein_coding	ENSG00000165995	-1.10985	0.767769	2.00815e-14	2.65043e-13
LIPC	protein_coding	ENSG00000166035	1.24748	-1.98774	0.000259972	0.000934759
GPT2	protein_coding	ENSG00000166123	-0.601107	6.20156	2.10444e-21	4.77753e-20
RAB8B	protein_coding	ENSG00000166128	0.656721	6.38037	9.54681e-20	1.92269e-18
SPINT1	protein_coding	ENSG00000166145	-0.94125	-3.01809	0.0221934	0.0487968
LRTM2	protein_coding	ENSG00000166159	1.70324	-2.54812	0.000388965	0.00134496
NOLC1	protein_coding	ENSG00000166197	0.747017	8.17204	9.60198e-25	2.65537e-23
TBATA	protein_coding	ENSG00000166220	6.43507	-4.01895	6.23998e-05	0.000253847
CLMP	protein_coding	ENSG00000166250	1.21138	3.9415	3.32015e-50	2.62205e-48
PLEKHF1	protein_coding	ENSG00000166289	-0.593309	2.22218	1.94836e-08	1.37666e-07
RAG1	protein_coding	ENSG00000166349	-0.881034	0.135467	4.35351e-07	2.54893e-06
PPFIBP2	protein_coding	ENSG00000166387	-0.82221	2.63963	1.26523e-12	1.39732e-11
CYB5R2	protein_coding	ENSG00000166394	0.909757	-1.85748	0.0132458	0.0312856
SERPINB8	protein_coding	ENSG00000166401	0.885878	4.5308	1.26309e-26	3.87076e-25
TUB	protein_coding	ENSG00000166402	-0.670833	5.90096	1.6631e-25	4.78602e-24
ZMAT1	protein_coding	ENSG00000166432	0.926287	-2.42843	0.0123448	0.0294154
RNF169	protein_coding	ENSG00000166439	-0.585865	5.60477	1.07268e-18	2.01228e-17
TMEM130	protein_coding	ENSG00000166448	-0.992904	0.071391	1.31174e-07	8.29674e-07
PRTG	protein_coding	ENSG00000166450	1.65233	2.26208	1.82237e-44	1.16743e-42
AKIP1	protein_coding	ENSG00000166452	-0.59553	4.39128	1.66471e-15	2.40539e-14
PKD1L2	polymorphic_pseudogene	ENSG00000166473	-1.26627	1.91789	8.4163e-25	2.33284e-23
CCDC68	protein_coding	ENSG00000166510	1.69451	-2.62704	0.00030567	0.00108179
IQCD	protein_coding	ENSG00000166578	-0.595638	0.858021	1.49228e-05	6.80511e-05
RRAD	protein_coding	ENSG00000166592	3.583	2.4615	5.49403e-61	6.39298e-59
MMP10	protein_coding	ENSG00000166670	1.22723	0.886433	1.55326e-10	1.39759e-09
ZNF606	protein_coding	ENSG00000166704	-0.761158	2.82907	6.90417e-15	9.46758e-14
ZCCHC18	protein_coding	ENSG00000166707	-0.585358	1.09445	3.02177e-05	0.000130557
ZNF667-AS1	lincRNA	ENSG00000166770	-0.693846	3.81812	3.78728e-18	6.81794e-17
YPEL4	protein_coding	ENSG00000166793	-0.706957	-1.19936	0.0206486	0.045878
FAM111A	protein_coding	ENSG00000166801	-0.769969	6.50544	7.06898e-32	2.79132e-30
LDHD	protein_coding	ENSG00000166816	-0.865712	-2.33698	0.0218257	0.048094
PEX11A	protein_coding	ENSG00000166821	-0.829773	1.32275	5.02178e-08	3.35533e-07
MESP1	protein_coding	ENSG00000166823	-0.959335	-1.36503	0.000261046	0.000938341
ANPEP	protein_coding	ENSG00000166825	1.14077	-0.430591	9.78728e-07	5.44323e-06
GLYATL1	protein_coding	ENSG00000166840	-0.646257	-0.555002	0.00335989	0.00933552
TAC3	protein_coding	ENSG00000166863	1.12629	-2.31895	0.00874757	0.0217961
CHP2	protein_coding	ENSG00000166869	-0.924488	-1.47352	0.00160201	0.00482345
SCG5	protein_coding	ENSG00000166922	2.32574	5.19669	3.01136e-158	2.59052e-155
SMAD3	protein_coding	ENSG00000166949	0.618714	7.28557	4.61374e-19	8.91903e-18
MAP1A	protein_coding	ENSG00000166963	-0.638008	6.79511	2.81739e-10	2.46414e-09
AKTIP	protein_coding	ENSG00000166971	-0.653078	4.1206	7.32104e-18	1.29568e-16
EVA1C	protein_coding	ENSG00000166979	1.19664	1.0341	4.62133e-16	7.00838e-15
MBD6	protein_coding	ENSG00000166987	-0.634071	5.47859	7.58452e-18	1.33936e-16
NAT16	protein_coding	ENSG00000167011	0.909628	2.35959	2.18269e-17	3.7234e-16
SGSM1	protein_coding	ENSG00000167037	-0.647828	0.187567	0.000166458	0.000624624
PIP5KL1	protein_coding	ENSG00000167103	-1.05714	1.55718	4.95152e-15	6.87024e-14
TMEM92	protein_coding	ENSG00000167105	0.627322	2.20675	2.22941e-08	1.56468e-07
FAM102A	protein_coding	ENSG00000167106	-0.624332	4.79852	2.57963e-18	4.70012e-17
CCDC103	protein_coding	ENSG00000167131	2.69485	-2.70384	1.48871e-06	8.03465e-06
ISLR2	protein_coding	ENSG00000167178	1.36422	-2.48453	0.00239279	0.00689745
SP2	protein_coding	ENSG00000167182	0.969713	4.47838	3.69415e-32	1.49548e-30
GPRC5B	protein_coding	ENSG00000167191	-0.630789	2.62201	2.61072e-09	2.05976e-08
GOLGA6C	protein_coding	ENSG00000167195	4.05854	-3.24994	2.05194e-08	1.44602e-07
FBXO22	protein_coding	ENSG00000167196	-0.77918	6.56878	3.04148e-32	1.23542e-30
LOXHD1	protein_coding	ENSG00000167210	2.78748	-2.89566	6.57199e-07	3.74939e-06
KATNAL2	protein_coding	ENSG00000167216	-0.731263	-1.92444	0.0220887	0.0485934
ZNF91	protein_coding	ENSG00000167232	-0.672846	2.4686	1.57263e-09	1.26816e-08
ENGASE	protein_coding	ENSG00000167280	-0.945644	4.52527	1.31709e-25	3.81307e-24
TRIM68	protein_coding	ENSG00000167333	-0.66676	3.92626	6.15447e-17	1.00777e-15
MIDN	protein_coding	ENSG00000167470	0.64643	5.61754	1.76942e-20	3.76502e-19
JSRP1	protein_coding	ENSG00000167476	-0.586069	-0.220833	0.00799434	0.0201296
KLHL26	protein_coding	ENSG00000167487	3.20081	2.74962	4.85029e-179	6.1489e-176
CACNB3	protein_coding	ENSG00000167535	-0.677956	4.86205	1.22488e-22	3.00703e-21
DHRS13	protein_coding	ENSG00000167536	-1.15677	3.15995	4.09275e-39	2.20541e-37
CORO6	protein_coding	ENSG00000167549	-1.23324	-2.71865	0.00108183	0.00339254
RHEBL1	protein_coding	ENSG00000167550	0.911495	2.2069	2.39831e-15	3.41622e-14
GPD1	protein_coding	ENSG00000167588	1.14268	-0.504187	1.198e-07	7.62182e-07
CYP2S1	protein_coding	ENSG00000167600	-0.978404	1.81879	3.45769e-16	5.29804e-15
TMEM145	protein_coding	ENSG00000167619	0.756013	1.05498	9.1007e-07	5.08015e-06
SPINT2	protein_coding	ENSG00000167642	0.844723	-0.665785	0.000282726	0.001008
SLC43A2	protein_coding	ENSG00000167703	0.932402	3.36631	1.81516e-23	4.70127e-22
RILP	protein_coding	ENSG00000167705	1.06775	1.21817	1.06333e-13	1.30675e-12
KLK11	protein_coding	ENSG00000167757	3.74959	-3.84949	0.000452382	0.00154058
KLK13	protein_coding	ENSG00000167759	1.60965	1.89694	8.71794e-39	4.65607e-37
ANGPTL4	protein_coding	ENSG00000167772	4.47961	-0.401349	8.29321e-52	6.88823e-50
TMEM88	protein_coding	ENSG00000167874	1.72267	-0.723694	5.08415e-10	4.33187e-09
TMC8	protein_coding	ENSG00000167895	1.55376	-2.00314	0.000220616	0.000806861
TMEM68	protein_coding	ENSG00000167904	-0.845231	3.64136	1.04338e-25	3.03158e-24
RAB26	protein_coding	ENSG00000167964	-0.84058	1.77669	8.07792e-11	7.52409e-10
KCTD5	protein_coding	ENSG00000167977	0.765177	6.38143	1.92603e-29	6.79243e-28
NLRC3	protein_coding	ENSG00000167984	2.39618	-1.22457	1.77695e-14	2.35691e-13
VWCE	protein_coding	ENSG00000167992	0.717934	1.14791	1.15912e-06	6.36131e-06
RAB3IL1	protein_coding	ENSG00000167994	-1.02898	3.6361	4.30579e-32	1.72856e-30
BEST1	protein_coding	ENSG00000167995	-0.615582	0.0151839	0.000742885	0.00241287
SAC3D1	protein_coding	ENSG00000168061	-0.689587	4.40232	1.81952e-19	3.61906e-18
BATF2	protein_coding	ENSG00000168062	0.893124	0.764748	2.77824e-07	1.66923e-06
KCNJ4	protein_coding	ENSG00000168135	1.30368	-2.29503	0.00605652	0.0157033
FAM83B	protein_coding	ENSG00000168143	1.47309	-0.623071	2.58098e-09	2.03763e-08
THAP9	protein_coding	ENSG00000168152	0.680985	1.92363	1.03e-08	7.52262e-08
DDIT4	protein_coding	ENSG00000168209	-0.773471	4.81227	3.67524e-26	1.09833e-24
ZCCHC4	protein_coding	ENSG00000168228	-0.601318	2.78011	3.70194e-09	2.87317e-08
POLR2J3	protein_coding	ENSG00000168255	-0.771149	-0.00761877	3.57316e-05	0.000152236
PTF1A	protein_coding	ENSG00000168267	-0.94414	-0.211526	5.55249e-07	3.20189e-06
PXK	protein_coding	ENSG00000168297	-0.721348	4.06478	8.7484e-20	1.77078e-18
HIST1H1E	protein_coding	ENSG00000168298	2.9607	0.361147	2.26066e-24	6.14589e-23
IRF2	protein_coding	ENSG00000168310	-1.00917	2.90881	1.26371e-24	3.47082e-23
XIRP1	protein_coding	ENSG00000168334	1.27826	2.86737	1.25802e-31	4.89529e-30
SCN11A	protein_coding	ENSG00000168356	1.10501	-2.68337	0.0173144	0.0394389
BDKRB2	protein_coding	ENSG00000168398	1.65317	-0.427128	1.02357e-15	1.50517e-14
RHOH	protein_coding	ENSG00000168421	1.96528	-3.73466	0.0050086	0.0132968
HR	protein_coding	ENSG00000168453	0.766515	5.29431	8.23624e-23	2.05156e-21
TXNDC2	protein_coding	ENSG00000168454	0.640652	-0.063008	0.0151431	0.0351129
TNXB	protein_coding	ENSG00000168477	0.664598	2.4681	7.45096e-08	4.87032e-07
SFTPC	protein_coding	ENSG00000168484	-1.32512	-3.66966	0.0170617	0.0389504
CAVIN2	protein_coding	ENSG00000168497	-2.41405	4.27933	2.62492e-196	4.21509e-193
ZSWIM1	protein_coding	ENSG00000168612	-0.60873	3.34234	4.82547e-10	4.12167e-09
GDNF	protein_coding	ENSG00000168621	5.56502	-2.60259	2.29155e-14	3.00308e-13
ZNF30	protein_coding	ENSG00000168661	-0.637738	2.10915	2.05384e-08	1.44694e-07
FAM84B	protein_coding	ENSG00000168672	-0.619343	5.32327	5.74943e-21	1.26819e-19
LDLRAD4	protein_coding	ENSG00000168675	-0.79975	3.53577	3.18658e-20	6.66852e-19
IL7R	protein_coding	ENSG00000168685	1.34871	7.69905	3.31167e-96	8.96271e-94
CNNM3	protein_coding	ENSG00000168763	-0.641488	4.94272	2.73894e-19	5.38553e-18
TET2	protein_coding	ENSG00000168769	-0.86384	5.22779	2.61865e-25	7.44691e-24
CXXC4	protein_coding	ENSG00000168772	-1.08108	1.68589	5.22108e-18	9.32938e-17
SHOX2	protein_coding	ENSG00000168779	-0.744747	4.08298	1.11808e-22	2.75934e-21
ABHD15	protein_coding	ENSG00000168792	-0.74247	3.62795	6.90323e-20	1.40794e-18
ATOH8	protein_coding	ENSG00000168874	-2.73314	-0.847922	3.48321e-21	7.80466e-20
ZNF608	protein_coding	ENSG00000168916	-1.23107	5.55845	8.50788e-50	6.58936e-48
SLC35G2	protein_coding	ENSG00000168917	0.874457	3.4421	1.16847e-22	2.87486e-21
SPRY3	protein_coding	ENSG00000168939	-0.696173	1.25086	1.32877e-07	8.38953e-07
TM4SF20	protein_coding	ENSG00000168955	2.19839	-3.82956	0.00316918	0.008867
GRM5	protein_coding	ENSG00000168959	-0.796754	-1.5809	0.00599216	0.0155493
JMJD7-PLA2G4B	protein_coding	ENSG00000168970	-1.08644	0.165483	5.0709e-08	3.38721e-07
SLC49A3	protein_coding	ENSG00000169026	0.977193	-1.97161	0.00455417	0.0122129
ZBBX	protein_coding	ENSG00000169064	-1.1419	-2.6629	0.00346264	0.00959447
ACTBL2	protein_coding	ENSG00000169067	0.87891	2.47315	2.55777e-18	4.66381e-17
AR	protein_coding	ENSG00000169083	-0.614422	3.73401	2.1061e-13	2.51386e-12
CPT1C	protein_coding	ENSG00000169169	0.640699	1.20323	5.11126e-05	0.000211429
CCDC126	protein_coding	ENSG00000169193	-0.594482	2.7189	9.62775e-10	7.95826e-09
CXCL10	protein_coding	ENSG00000169245	5.64295	-4.21288	0.00086622	0.00277418
CXCL11	protein_coding	ENSG00000169248	1.28515	-3.10174	0.0197411	0.0441919
NR0B1	protein_coding	ENSG00000169297	0.961105	1.47462	1.06079e-12	1.18183e-11
STK32A	protein_coding	ENSG00000169302	-1.07449	2.42542	2.97212e-26	8.92635e-25
IL1RAPL1	protein_coding	ENSG00000169306	1.20046	2.17496	1.0569e-23	2.76712e-22
KIAA1024	protein_coding	ENSG00000169330	0.921697	2.60365	2.01178e-20	4.26564e-19
CXCL8	protein_coding	ENSG00000169429	5.92058	6.39604	1.73768e-49	1.33298e-47
COL22A1	protein_coding	ENSG00000169436	1.06927	5.58908	2.56985e-49	1.95268e-47
GPR183	protein_coding	ENSG00000169508	6.33275	1.14668	7.10795e-149	4.62727e-146
CRCT1	protein_coding	ENSG00000169509	6.17409	-4.16345	0.000366046	0.0012756
ZNF280A	protein_coding	ENSG00000169548	0.713481	1.97607	2.90822e-09	2.28029e-08
MUC15	protein_coding	ENSG00000169550	0.930758	2.54621	3.55161e-13	4.14877e-12
DTWD2	protein_coding	ENSG00000169570	-0.593203	2.91587	7.26852e-10	6.10236e-09
DFFB	protein_coding	ENSG00000169598	-0.625538	1.46347	9.07228e-06	4.29742e-05
GKN1	protein_coding	ENSG00000169605	2.34131	-1.78104	1.79061e-10	1.59802e-09
BCRP2	transcribed_unprocessed_pseudogene	ENSG00000169668	-1.69582	-3.92436	0.0127287	0.0301975
LRRC45	protein_coding	ENSG00000169683	-0.820052	4.35286	1.98276e-27	6.37634e-26
ZNF32	protein_coding	ENSG00000169740	-0.599386	4.16163	2.73237e-14	3.54033e-13
RAC3	protein_coding	ENSG00000169750	-1.1377	1.39079	4.40158e-12	4.65412e-11
TMEM266	protein_coding	ENSG00000169758	-1.33035	-2.55521	0.000385617	0.00133415
TACR3	protein_coding	ENSG00000169836	1.28899	-2.98867	0.0102927	0.0251261
PCDH7	protein_coding	ENSG00000169851	3.04701	6.81146	0	0
ONECUT1	protein_coding	ENSG00000169856	-1.39441	0.684362	6.87343e-19	1.31085e-17
TRIM56	protein_coding	ENSG00000169871	-0.667457	6.3761	4.12808e-22	9.7771e-21
WNT10B	protein_coding	ENSG00000169884	-0.591193	2.30849	2.73602e-08	1.89266e-07
MUC3A	protein_coding	ENSG00000169894	-0.768358	0.803559	1.85356e-06	9.86886e-06
ITGAM	protein_coding	ENSG00000169896	0.970345	-0.306863	8.43207e-06	4.02504e-05
TM4SF1	protein_coding	ENSG00000169908	2.389	7.35123	3.97497e-188	5.31917e-185
OTUD7A	protein_coding	ENSG00000169918	-0.749637	0.193215	9.76358e-06	4.60226e-05
IFFO2	protein_coding	ENSG00000169991	0.984298	5.69829	6.07006e-45	3.96232e-43
MYRIP	protein_coding	ENSG00000170011	-0.873397	-0.986666	0.000346034	0.00121129
ZPLD1	protein_coding	ENSG00000170044	1.2102	-1.19196	0.000347138	0.00121445
SERPINA9	protein_coding	ENSG00000170054	1.88237	1.07158	2.88067e-35	1.3318e-33
FAM153A	protein_coding	ENSG00000170074	1.39806	2.87336	7.01013e-40	3.87277e-38
NSG2	protein_coding	ENSG00000170091	1.8972	-2.58828	5.74913e-05	0.000235389
FOXD4	protein_coding	ENSG00000170122	1.00487	-0.23068	1.11225e-05	5.19199e-05
CCDC144A	protein_coding	ENSG00000170160	1.22385	-1.39213	6.97156e-05	0.000281423
NANP	protein_coding	ENSG00000170191	-0.696465	4.70407	1.21451e-21	2.7914e-20
FAXDC2	protein_coding	ENSG00000170271	-1.93595	-0.753039	1.69341e-16	2.66422e-15
HSPB2	protein_coding	ENSG00000170276	-0.775516	-0.655035	0.000372172	0.00129377
CMTM8	protein_coding	ENSG00000170293	-0.99957	2.91423	1.22593e-22	3.00703e-21
LGALS9B	protein_coding	ENSG00000170298	2.23045	-4.2939	0.022076	0.0485805
EMX2	protein_coding	ENSG00000170370	-1.14933	2.34239	1.44822e-25	4.18264e-24
ZNF804A	protein_coding	ENSG00000170396	1.49899	-1.43276	1.43831e-06	7.7888e-06
KRT78	protein_coding	ENSG00000170423	2.50448	-3.5518	0.00174472	0.00521143
METTL7B	protein_coding	ENSG00000170439	1.33339	3.38011	3.13036e-46	2.14818e-44
KRT86	protein_coding	ENSG00000170442	0.592124	0.880129	0.000488597	0.001652
KRT75	protein_coding	ENSG00000170454	1.37338	5.07588	1.26463e-88	2.92895e-86
DENND5B	protein_coding	ENSG00000170456	-0.643936	5.53266	9.62901e-20	1.93763e-18
MZB1	protein_coding	ENSG00000170476	2.16581	-3.46126	0.00125422	0.00387733
KRT4	protein_coding	ENSG00000170477	3.76962	-3.82664	0.000258606	0.000930403
KISS1	protein_coding	ENSG00000170498	0.767425	5.51486	7.88495e-12	8.11644e-11
LONRF2	protein_coding	ENSG00000170500	0.933461	3.59802	1.77105e-27	5.70311e-26
ARL6IP1	protein_coding	ENSG00000170540	0.585943	6.60503	4.85686e-17	8.0498e-16
IRX2	protein_coding	ENSG00000170561	2.45597	-3.63631	0.00115759	0.00360942
SIX2	protein_coding	ENSG00000170577	-0.830529	1.86369	1.2836e-12	1.41566e-11
FOXA3	protein_coding	ENSG00000170608	1.02354	-0.208889	1.4193e-06	7.69277e-06
ZNF296	protein_coding	ENSG00000170684	0.727966	1.96199	1.23822e-08	8.95647e-08
POLH	protein_coding	ENSG00000170734	-1.01504	5.5875	7.12388e-54	6.40272e-52
SYT9	protein_coding	ENSG00000170743	-1.11292	0.247903	1.1169e-10	1.02175e-09
GPR37	protein_coding	ENSG00000170775	-1.03717	0.943403	9.98738e-14	1.22926e-12
CELP	transcribed_unprocessed_pseudogene	ENSG00000170827	-2.06886	-3.92308	0.00289551	0.00818434
PPM1D	protein_coding	ENSG00000170836	-1.02777	6.49353	1.22938e-58	1.29311e-56
AC093323.1	protein_coding	ENSG00000170846	5.14133	-0.682844	2.44035e-46	1.68426e-44
PSG6	protein_coding	ENSG00000170848	2.65743	-3.32233	0.000663669	0.0021779
PAQR8	protein_coding	ENSG00000170915	0.859188	1.93943	8.71515e-15	1.18533e-13
TEX13B	protein_coding	ENSG00000170925	4.41649	-2.92909	2.7638e-07	1.66097e-06
HAS2	protein_coding	ENSG00000170961	1.36138	2.6567	4.70031e-29	1.62434e-27
S1PR1	protein_coding	ENSG00000170989	1.9482	2.36374	5.32396e-60	5.88249e-58
SOX7	protein_coding	ENSG00000171056	0.77709	-1.30843	0.0194127	0.0435661
C11orf24	protein_coding	ENSG00000171067	0.905559	6.98691	1.77556e-44	1.14048e-42
INSR	protein_coding	ENSG00000171105	-0.717985	2.73571	1.3352e-13	1.62348e-12
HSFX1	protein_coding	ENSG00000171116	1.43229	-2.82917	0.00936087	0.023147
NRTN	protein_coding	ENSG00000171119	-0.726287	0.221324	3.17571e-05	0.000136577
KCNMB3	protein_coding	ENSG00000171121	-0.78329	1.38318	3.21786e-09	2.51243e-08
KCNG3	protein_coding	ENSG00000171126	-0.682604	1.25761	1.04233e-07	6.68082e-07
GRIK1	protein_coding	ENSG00000171189	1.33266	-1.77019	5.91501e-05	0.000241688
JUNB	protein_coding	ENSG00000171223	1.24959	5.84473	1.41287e-65	1.90121e-63
FAM241B	protein_coding	ENSG00000171224	-0.7732	2.8183	2.2199e-15	3.16958e-14
TMEM37	protein_coding	ENSG00000171227	-1.43062	1.70291	1.8161e-31	6.9991e-30
LRG1	protein_coding	ENSG00000171236	1.87846	-2.01753	1.98612e-07	1.21823e-06
NPTX1	protein_coding	ENSG00000171246	3.88181	-3.86976	9.60395e-05	0.000377559
ZNF439	protein_coding	ENSG00000171291	-0.833359	1.62876	6.20817e-11	5.84354e-10
KCNK3	protein_coding	ENSG00000171303	0.787477	1.39137	9.91325e-10	8.18021e-09
CHST11	protein_coding	ENSG00000171310	1.39	5.04297	3.22121e-81	6.46577e-79
ESCO2	protein_coding	ENSG00000171320	-0.624795	5.03531	2.34832e-19	4.6402e-18
KRT15	protein_coding	ENSG00000171346	0.635845	2.34505	7.95158e-08	5.17228e-07
KRT9	protein_coding	ENSG00000171403	1.25102	-2.83579	0.0112704	0.0271959
KRT20	protein_coding	ENSG00000171431	3.94364	-1.00204	1.84663e-26	5.58792e-25
KSR2	protein_coding	ENSG00000171435	0.732693	2.0874	1.40755e-10	1.27314e-09
POLR1C	protein_coding	ENSG00000171453	0.597965	5.3825	2.69642e-17	4.5578e-16
LRRC8C	protein_coding	ENSG00000171488	0.856767	5.17431	1.06362e-34	4.77975e-33
COL24A1	protein_coding	ENSG00000171502	0.84541	0.227508	5.04368e-06	2.49974e-05
FGB	protein_coding	ENSG00000171564	5.78397	-3.96945	0.000553595	0.00184867
CXXC5	protein_coding	ENSG00000171604	1.11428	4.08049	4.98795e-41	2.80058e-39
PIK3CD	protein_coding	ENSG00000171608	1.21562	5.58285	7.25355e-66	9.87098e-64
ENC1	protein_coding	ENSG00000171617	1.20313	7.80903	2.45493e-75	4.28493e-73
P2RY6	protein_coding	ENSG00000171631	2.35999	-1.79562	7.61372e-10	6.38328e-09
NMRAL2P	transcribed_unprocessed_pseudogene	ENSG00000171658	0.895265	1.50248	5.94736e-13	6.79573e-12
GATM	protein_coding	ENSG00000171766	0.844132	-0.714778	0.00039024	0.00134859
RASGRP4	protein_coding	ENSG00000171777	-0.629082	1.26364	1.77681e-06	9.48958e-06
BCL2	protein_coding	ENSG00000171791	-0.615117	3.86185	4.16849e-14	5.32377e-13
CTPS1	protein_coding	ENSG00000171793	1.08917	8.2619	4.84979e-56	4.69144e-54
ZNF540	protein_coding	ENSG00000171817	-0.662107	-0.860417	0.00501963	0.0133203
MLLT3	protein_coding	ENSG00000171843	-1.28261	2.70817	2.61307e-33	1.1023e-31
FAM90A1	protein_coding	ENSG00000171847	3.52847	-1.89522	3.80696e-16	5.81842e-15
PRND	protein_coding	ENSG00000171864	1.84615	-2.75505	0.000213064	0.000781019
ADRA1D	protein_coding	ENSG00000171873	2.01248	-2.82921	9.48536e-05	0.000373201
FRMD5	protein_coding	ENSG00000171877	0.704806	5.52138	8.04125e-25	2.23919e-23
MIR31HG	sense_overlapping	ENSG00000171889	1.10546	-1.61641	0.00219688	0.00638391
CYP4F11	protein_coding	ENSG00000171903	1.24338	4.29008	1.30349e-59	1.42068e-57
FBXW10	protein_coding	ENSG00000171931	0.987301	0.114435	2.7504e-06	1.42563e-05
ZNF217	protein_coding	ENSG00000171940	0.58961	6.35819	1.26265e-17	2.1975e-16
CYP4F22	protein_coding	ENSG00000171954	1.34065	-0.269333	9.92792e-11	9.1517e-10
ZNF57	protein_coding	ENSG00000171970	0.591294	2.635	5.06864e-09	3.86478e-08
RAB33B	protein_coding	ENSG00000172007	-0.861313	2.96717	1.11128e-18	2.07983e-17
ANKRD20A4	protein_coding	ENSG00000172014	0.95151	-1.79759	0.0076458	0.0193572
KLF11	protein_coding	ENSG00000172059	-0.61706	4.67276	1.75317e-18	3.24087e-17
KRCC1	protein_coding	ENSG00000172086	0.835719	1.50918	2.30819e-08	1.61574e-07
SNTB1	protein_coding	ENSG00000172164	-0.837843	2.08859	2.0151e-15	2.89259e-14
MTBP	protein_coding	ENSG00000172167	-0.614191	4.91407	7.42133e-18	1.31246e-16
MBOAT1	protein_coding	ENSG00000172197	-1.06576	1.41134	1.99854e-16	3.11781e-15
ID4	protein_coding	ENSG00000172201	1.31649	2.99071	2.29807e-41	1.30551e-39
B3GALT1	protein_coding	ENSG00000172318	0.598225	0.25527	0.00115732	0.00360907
STARD5	protein_coding	ENSG00000172345	-1.40122	1.52227	3.9215e-32	1.57998e-30
ABCG4	protein_coding	ENSG00000172350	-0.709665	0.494839	5.02137e-05	0.000208032
PRSS27	protein_coding	ENSG00000172382	0.626727	-1.14877	0.020958	0.0464605
SYNPO2	protein_coding	ENSG00000172403	-0.864403	-0.269138	6.42109e-06	3.12707e-05
PRSS30P	transcribed_unitary_pseudogene	ENSG00000172460	3.41827	-3.2584	7.18281e-06	3.46857e-05
FUT9	protein_coding	ENSG00000172461	-0.975616	1.41043	9.22079e-15	1.25127e-13
CARNS1	protein_coding	ENSG00000172508	1.29801	0.996164	8.69999e-18	1.53185e-16
PDE3A	protein_coding	ENSG00000172572	1.77067	0.66411	2.71275e-22	6.51386e-21
KLHL6	protein_coding	ENSG00000172578	2.885	-3.70215	0.00038349	0.00132813
SMPDL3A	protein_coding	ENSG00000172594	-0.666665	2.04966	3.83539e-09	2.96861e-08
ZNF738	protein_coding	ENSG00000172687	-1.3053	1.65588	7.56526e-22	1.75553e-20
SLFN11	protein_coding	ENSG00000172716	1.69913	-2.7716	0.00419974	0.0113624
PURG	protein_coding	ENSG00000172733	-1.05408	1.94656	7.38145e-21	1.61194e-19
TMEM217	protein_coding	ENSG00000172738	1.40766	2.017	3.26768e-34	1.42588e-32
ZNF596	protein_coding	ENSG00000172748	-0.709041	-0.164577	0.00112722	0.00352079
CES4A	protein_coding	ENSG00000172824	2.32471	-1.04701	2.77093e-13	3.25737e-12
LVRN	protein_coding	ENSG00000172901	-0.645614	-0.440271	0.0061639	0.0159628
NBEA	protein_coding	ENSG00000172915	-0.68944	2.62972	9.31539e-13	1.04655e-11
MYEOV	protein_coding	ENSG00000172927	-0.963906	7.86064	2.33418e-49	1.77922e-47
FRG2C	protein_coding	ENSG00000172969	-1.17524	-2.73244	0.00425781	0.0114911
ARPP21	protein_coding	ENSG00000172995	0.91307	1.27067	6.67666e-12	6.91404e-11
ZNF680	protein_coding	ENSG00000173041	-0.669328	3.21397	1.16008e-12	1.28769e-11
2019-12-01	protein_coding	ENSG00000173077	1.26828	-0.27773	6.68317e-10	5.62269e-09
HSPA6	protein_coding	ENSG00000173110	1.27232	0.708523	8.25135e-11	7.67079e-10
ADAMTS20	protein_coding	ENSG00000173157	-0.611824	0.287538	0.000221359	0.000808963
RAPH1	protein_coding	ENSG00000173166	1.21301	6.26619	5.33206e-73	8.91897e-71
ABCD2	protein_coding	ENSG00000173208	-1.10502	-1.84802	8.99212e-05	0.000355595
AHSA2P	transcribed_unitary_pseudogene	ENSG00000173209	-0.628549	5.9102	9.09875e-14	1.12506e-12
ABLIM3	protein_coding	ENSG00000173210	1.05832	4.94123	1.36999e-46	9.59274e-45
MFSD4B	protein_coding	ENSG00000173214	-0.728457	3.13519	1.4775e-15	2.14518e-14
SYT12	protein_coding	ENSG00000173227	1.40246	5.53292	1.03385e-89	2.46557e-87
C11orf86	protein_coding	ENSG00000173237	4.17956	0.00919052	1.77349e-53	1.57631e-51
ZNF483	protein_coding	ENSG00000173258	-0.634139	-0.942633	0.0124779	0.0296961
SLC2A14	protein_coding	ENSG00000173262	-1.08423	-0.404036	5.79994e-08	3.84011e-07
MMRN2	protein_coding	ENSG00000173269	1.42534	-1.85895	6.76451e-05	0.000273935
TNKS	protein_coding	ENSG00000173273	-0.622908	5.73196	9.10674e-20	1.84022e-18
ZNF449	protein_coding	ENSG00000173275	-0.838744	2.72098	7.08218e-17	1.15185e-15
FAM86B3P	transcribed_unprocessed_pseudogene	ENSG00000173295	1.19804	1.42478	9.78594e-20	1.96756e-18
STOX2	protein_coding	ENSG00000173320	-0.956368	2.79803	1.71113e-22	4.16324e-21
TRIB1	protein_coding	ENSG00000173334	1.0855	5.57747	7.38188e-17	1.19575e-15
IQCF1	protein_coding	ENSG00000173389	2.93783	-1.11384	1.38154e-17	2.39749e-16
OLR1	protein_coding	ENSG00000173391	1.01432	1.63141	1.44953e-15	2.10838e-14
ARV1	protein_coding	ENSG00000173409	-0.753457	2.68523	2.4696e-14	3.21889e-13
MST1	protein_coding	ENSG00000173531	-0.624497	0.00752964	0.000279917	0.000999015
CSPG4	protein_coding	ENSG00000173546	0.745143	7.07039	3.82521e-23	9.68852e-22
NABP1	protein_coding	ENSG00000173559	0.862946	6.55656	5.92981e-32	2.35695e-30
CHD2	protein_coding	ENSG00000173575	-0.722028	6.12385	3.67338e-26	1.09833e-24
SULT1B1	protein_coding	ENSG00000173597	1.65877	-2.46709	0.00456297	0.0122338
HSPB7	protein_coding	ENSG00000173641	1.09861	-0.164791	8.46779e-09	6.27388e-08
[truncated: 3,118 more rows]

## Sheet: G1S_vs_S_category
3prime_overlapping_ncRNA	2
antisense	593
bidirectional_promoter_lncRNA	16
IG_V_gene	5
IG_V_pseudogene	3
lincRNA	773
miRNA	19
misc_RNA	18
Mt_tRNA	5
non_coding	1
polymorphic_pseudogene	2
processed_pseudogene	211
processed_transcript	87
protein_coding	2844
pseudogene	1
rRNA_pseudogene	1
sense_intronic	70
sense_overlapping	33
snoRNA	13
snRNA	9
TEC	103
TR_C_gene	3
TR_J_gene	1
TR_V_gene	5
TR_V_pseudogene	2
transcribed_processed_pseudogene	44
transcribed_unitary_pseudogene	23
transcribed_unprocessed_pseudogene	137
unitary_pseudogene	2
unprocessed_pseudogene	91

## Sheet: S_vs_G2
gene_names	bio_type	ensemble_id	logFC	logCPM	PValue	FDR
ENPP4	protein_coding	ENSG00000001561	-0.633302	4.3141	3.42722e-17	7.77321e-16
RAD52	protein_coding	ENSG00000002016	0.624539	3.7071	2.06292e-11	2.5172e-10
MYH16	transcribed_unitary_pseudogene	ENSG00000002079	0.650453	3.17598	4.56113e-12	6.07319e-11
ICA1	protein_coding	ENSG00000003147	-0.637103	0.247671	0.00087089	0.00304325
RBM6	protein_coding	ENSG00000004534	0.655405	7.0764	3.26813e-24	1.299e-22
PDK4	protein_coding	ENSG00000004799	-1.07343	-0.338028	3.70983e-06	2.08782e-05
ACSM3	protein_coding	ENSG00000005187	0.686681	0.490349	0.000110142	0.00047139
CREBBP	protein_coding	ENSG00000005339	0.777479	7.54064	8.7364e-29	4.62491e-27
MPO	protein_coding	ENSG00000005381	-0.657055	-1.43448	0.0116958	0.0297672
ABCB4	protein_coding	ENSG00000005471	-1.1358	2.25998	6.5327e-23	2.36977e-21
KMT2E	protein_coding	ENSG00000005483	1.01133	5.87571	1.98937e-47	2.99487e-45
SOX8	protein_coding	ENSG00000005513	-1.74313	2.09253	4.55566e-53	8.50637e-51
TMEM98	protein_coding	ENSG00000006042	-0.590708	6.03336	3.18784e-19	8.74549e-18
KRT33A	protein_coding	ENSG00000006059	-1.58814	-2.6558	0.000209927	0.000846138
MAP3K14	protein_coding	ENSG00000006062	-0.628657	5.06633	5.03593e-16	1.02536e-14
CX3CL1	protein_coding	ENSG00000006210	-1.08766	3.53064	8.9965e-32	5.62854e-30
TNFRSF12A	protein_coding	ENSG00000006327	-0.643533	7.59992	1.5506e-20	4.83798e-19
KDM7A	protein_coding	ENSG00000006459	-0.741979	4.08819	3.10454e-12	4.21527e-11
DBF4	protein_coding	ENSG00000006634	1.04209	6.4827	1.60738e-40	1.69069e-38
NOS2	protein_coding	ENSG00000007171	-0.861304	1.41939	2.93021e-09	2.70525e-08
SCN4A	protein_coding	ENSG00000007314	0.973266	0.52873	9.63349e-09	8.26949e-08
LUC7L	protein_coding	ENSG00000007392	0.748209	5.65094	3.29345e-28	1.67715e-26
MMP25	protein_coding	ENSG00000008516	-0.645267	0.325827	0.000695602	0.00248369
ETV7	protein_coding	ENSG00000010030	-0.589991	0.713713	3.82407e-05	0.000179447
ZNF207	protein_coding	ENSG00000010244	0.637858	7.37053	7.64203e-24	2.93111e-22
GIPR	protein_coding	ENSG00000010310	-0.662901	0.225825	0.00063016	0.0022726
CLCN6	protein_coding	ENSG00000011021	0.722972	5.34485	2.38842e-25	1.02185e-23
AKAP8L	protein_coding	ENSG00000011243	0.812065	5.70055	7.93829e-35	6.2081e-33
LARS2	protein_coding	ENSG00000011376	0.705135	5.38989	5.47535e-24	2.13751e-22
ANLN	protein_coding	ENSG00000011426	0.740036	9.29964	1.60525e-26	7.4072e-25
RABGAP1	protein_coding	ENSG00000011454	0.60584	5.2677	2.60848e-17	5.99527e-16
ALOX5	protein_coding	ENSG00000012779	-0.735647	4.42731	1.06826e-21	3.62411e-20
UBR7	protein_coding	ENSG00000012963	-0.656316	5.31764	3.13369e-19	8.60675e-18
RWDD2A	protein_coding	ENSG00000013392	-0.619547	1.55312	2.52573e-06	1.46243e-05
POLR3B	protein_coding	ENSG00000013503	0.704562	4.51394	5.15959e-20	1.54001e-18
TACC3	protein_coding	ENSG00000013810	0.800718	7.31776	1.23981e-34	9.42058e-33
CHDH	protein_coding	ENSG00000016391	-0.611954	1.22358	1.49805e-05	7.59494e-05
IL20RA	protein_coding	ENSG00000016402	-0.875557	-1.70497	0.0095354	0.0249814
ATP1A2	protein_coding	ENSG00000018625	-1.08857	1.33371	1.31001e-13	2.06507e-12
MARCO	protein_coding	ENSG00000019169	0.62725	4.08164	4.37645e-13	6.49511e-12
CYP24A1	protein_coding	ENSG00000019186	-0.608376	5.9735	2.41138e-19	6.72256e-18
CD74	protein_coding	ENSG00000019582	0.953607	-2.73229	0.0120743	0.0305948
ZRANB1	protein_coding	ENSG00000019995	0.602366	5.7094	1.81693e-18	4.64098e-17
RUNX3	protein_coding	ENSG00000020633	-0.816951	3.97168	1.08853e-24	4.47432e-23
BIRC3	protein_coding	ENSG00000023445	-3.78955	5.58688	3.99226e-47	5.86351e-45
DEPDC1	protein_coding	ENSG00000024526	1.59206	6.44127	8.40336e-122	1.06533e-118
RRAGD	protein_coding	ENSG00000025039	-1.09181	3.87874	4.35133e-40	4.42239e-38
RTEL1-TNFRSF6B	protein_coding	ENSG00000026036	0.753042	0.252899	2.84675e-05	0.000137003
SH2D2A	protein_coding	ENSG00000027869	-0.749329	3.09175	1.94078e-16	4.10674e-15
TNFRSF1B	protein_coding	ENSG00000028137	-1.71326	-1.2793	1.71217e-09	1.62558e-08
POU2F2	protein_coding	ENSG00000028277	-1.94045	4.35295	1.12184e-126	1.80146e-123
ARNTL2	protein_coding	ENSG00000029153	-0.593429	5.86568	3.62885e-19	9.93275e-18
ZCCHC8	protein_coding	ENSG00000033030	0.706857	5.35276	8.58843e-26	3.80975e-24
LRRC7	protein_coding	ENSG00000033122	-0.937033	-0.186323	5.37224e-05	0.000245496
PIAS1	protein_coding	ENSG00000033800	0.736627	5.62597	3.87634e-28	1.95743e-26
MAP2K3	protein_coding	ENSG00000034152	-1.20359	6.92867	1.8274e-62	4.68261e-60
CUL3	protein_coding	ENSG00000036257	0.651539	7.06685	8.96727e-23	3.22862e-21
USP2	protein_coding	ENSG00000036672	-1.76377	-0.841947	2.07876e-09	1.95973e-08
FLT4	protein_coding	ENSG00000037280	-0.685233	4.3258	5.21061e-19	1.40232e-17
VCAN	protein_coding	ENSG00000038427	0.783932	-0.959072	0.000470272	0.0017486
CDH1	protein_coding	ENSG00000039068	-0.803538	2.5409	1.64262e-15	3.14014e-14
SPDL1	protein_coding	ENSG00000040275	0.808012	6.21676	1.3294e-33	9.47373e-32
RTN4R	protein_coding	ENSG00000040608	-0.6381	3.87565	5.10081e-12	6.75073e-11
THAP3	protein_coding	ENSG00000041988	0.810427	2.90304	3.98418e-16	8.22338e-15
TG	protein_coding	ENSG00000042832	1.25963	-1.37464	7.51261e-07	4.76828e-06
ADRB1	protein_coding	ENSG00000043591	-3.10554	-3.78851	0.000297	0.00115608
GEMIN8	protein_coding	ENSG00000046647	0.769038	1.00551	5.26139e-07	3.43606e-06
XK	protein_coding	ENSG00000047597	-0.716489	1.43212	4.81671e-07	3.16562e-06
FAM184B	protein_coding	ENSG00000047662	2.13857	-2.70381	3.66039e-05	0.000172438
ROS1	protein_coding	ENSG00000047936	0.95711	3.86956	2.61558e-33	1.82613e-31
HDAC9	protein_coding	ENSG00000048052	-1.1147	5.3146	8.77612e-48	1.33791e-45
CC2D2A	protein_coding	ENSG00000048342	0.676683	4.2704	5.20403e-18	1.27388e-16
RSF1	protein_coding	ENSG00000048649	0.678614	6.58254	2.79445e-22	9.82627e-21
KITLG	protein_coding	ENSG00000049130	-1.71086	5.25265	1.70475e-94	1.05288e-91
TNFRSF9	protein_coding	ENSG00000049249	-1.46655	4.363	9.43296e-76	3.66471e-73
NEDD4L	protein_coding	ENSG00000049759	0.842343	7.27272	1.30627e-38	1.25355e-36
PPP1R3F	protein_coding	ENSG00000049769	-0.759703	1.53294	3.15071e-09	2.88779e-08
NEXMIF	protein_coding	ENSG00000050030	-0.704307	0.0698142	0.00283263	0.00869167
SLC4A8	protein_coding	ENSG00000050438	0.965408	4.20094	9.09558e-33	6.17142e-31
PTGER3	protein_coding	ENSG00000050628	-0.963095	-1.53768	0.00665236	0.0183236
HERPUD1	protein_coding	ENSG00000051108	-1.0315	6.70387	6.4308e-57	1.32392e-54
CYBA	protein_coding	ENSG00000051523	1.10308	-1.74717	0.00083888	0.00294292
PLEKHA5	protein_coding	ENSG00000052126	0.679776	5.74636	5.53945e-24	2.15904e-22
PRSS8	protein_coding	ENSG00000052344	0.698439	-0.924403	0.00199117	0.00634744
TTC17	protein_coding	ENSG00000052841	0.6358	5.94625	3.29385e-22	1.14486e-20
ARID4B	protein_coding	ENSG00000054267	0.585703	5.8281	6.16562e-17	1.35999e-15
FOXC1	protein_coding	ENSG00000054598	-0.799444	4.14017	9.56746e-23	3.42933e-21
ATP9A	protein_coding	ENSG00000054793	-1.19997	5.47647	4.38485e-71	1.44682e-68
CBLN4	protein_coding	ENSG00000054803	-0.687371	-0.527953	0.0024301	0.00758505
KCNH2	protein_coding	ENSG00000055118	-0.843611	2.22447	3.30644e-13	5.0058e-12
KMT2C	protein_coding	ENSG00000055609	0.58534	4.94519	1.87246e-13	2.91168e-12
CCDC85A	protein_coding	ENSG00000055813	-1.03422	2.03679	5.5635e-18	1.35911e-16
TRAF1	protein_coding	ENSG00000056558	-2.79135	3.75293	1.79227e-60	4.1913e-58
IL17RB	protein_coding	ENSG00000056736	-0.957871	1.73245	1.28686e-13	2.03124e-12
PPP1R12A	protein_coding	ENSG00000058272	0.606966	6.61984	7.72919e-18	1.86733e-16
CAMK2B	protein_coding	ENSG00000058404	-1.04322	0.798727	3.59792e-11	4.26701e-10
CROCC	protein_coding	ENSG00000058453	0.951052	4.80388	3.45461e-34	2.56825e-32
ZC3H11A	protein_coding	ENSG00000058673	1.20427	-2.26822	0.00683206	0.018743
CCAR1	protein_coding	ENSG00000060339	0.808513	7.56722	3.8952e-34	2.86048e-32
PIGV	protein_coding	ENSG00000060642	-0.626379	3.49593	7.2062e-13	1.04381e-11
QSER1	protein_coding	ENSG00000060749	0.687763	7.60974	9.88166e-23	3.53669e-21
PRDM6	protein_coding	ENSG00000061455	1.15961	-2.00484	0.00152721	0.0050309
GUCY1B1	protein_coding	ENSG00000061918	-0.963222	1.28558	6.29867e-10	6.34795e-09
ZNF112	protein_coding	ENSG00000062370	0.646961	2.57618	2.96944e-09	2.73832e-08
BICRA	protein_coding	ENSG00000063169	0.711351	4.60055	4.43233e-17	9.94983e-16
DMRT3	protein_coding	ENSG00000064218	-0.992835	-1.50758	0.00540128	0.0152646
SUGP2	protein_coding	ENSG00000064607	0.733406	6.75329	3.19376e-30	1.85369e-28
EYA2	protein_coding	ENSG00000064655	-0.925549	2.24425	2.25428e-17	5.21602e-16
SNCAIP	protein_coding	ENSG00000064692	-0.852953	-0.148473	2.40461e-05	0.000117223
UHRF1BP1	protein_coding	ENSG00000065060	-0.711136	6.3344	1.06511e-24	4.38552e-23
TRAM2	protein_coding	ENSG00000065308	0.737659	7.059	1.04228e-28	5.48154e-27
SNAP91	protein_coding	ENSG00000065609	-1.84511	-0.109633	1.58214e-15	3.02934e-14
ME1	protein_coding	ENSG00000065833	-0.697238	4.63377	9.91469e-21	3.12995e-19
MTHFD2	protein_coding	ENSG00000065911	-0.684732	8.1338	2.44629e-22	8.62719e-21
DIP2B	protein_coding	ENSG00000066084	0.712934	6.13165	1.96611e-23	7.35368e-22
KDM4A	protein_coding	ENSG00000066135	0.779367	5.25228	9.04683e-30	5.09138e-28
ASPM	protein_coding	ENSG00000066279	1.74617	7.35943	3.48861e-123	4.94295e-120
MPPED2	protein_coding	ENSG00000066382	-0.712611	0.638517	4.87857e-06	2.68902e-05
ZBTB11	protein_coding	ENSG00000066422	0.659295	6.04091	2.97111e-23	1.1027e-21
ISOC1	protein_coding	ENSG00000066583	-0.657581	5.36042	4.30393e-21	1.39715e-19
KIF26A	protein_coding	ENSG00000066735	-1.00786	3.85456	1.55997e-25	6.85675e-24
ZFAT	protein_coding	ENSG00000066827	1.01767	3.77558	8.5558e-34	6.1887e-32
STAG3	protein_coding	ENSG00000066923	0.811173	-1.07612	0.00108375	0.00370168
EVI5	protein_coding	ENSG00000067208	0.882254	4.43617	2.44056e-31	1.49202e-29
SYT1	protein_coding	ENSG00000067715	0.688071	2.27116	1.82446e-11	2.24787e-10
PDZD4	protein_coding	ENSG00000067840	-0.631249	4.5216	1.15099e-17	2.73141e-16
ATP2B3	protein_coding	ENSG00000067842	-0.84086	0.207001	0.000167497	0.000688833
HDAC4	protein_coding	ENSG00000068024	0.717228	0.714639	3.00593e-06	1.71573e-05
RASSF1	protein_coding	ENSG00000068028	0.710823	4.36483	3.47779e-21	1.13972e-19
REEP1	protein_coding	ENSG00000068615	-1.4215	2.41964	1.29197e-37	1.17433e-35
IP6K2	protein_coding	ENSG00000068745	0.635387	5.74931	8.8862e-22	3.04037e-20
ADGRF5	protein_coding	ENSG00000069122	0.619366	2.35786	9.93945e-09	8.5109e-08
BCL3	protein_coding	ENSG00000069399	-1.11858	3.74845	2.66279e-36	2.24261e-34
DAPP1	protein_coding	ENSG00000070190	-1.02842	-1.09	0.000141723	0.000591389
MNT	protein_coding	ENSG00000070444	-0.84902	4.53952	9.80782e-28	4.82125e-26
JMJD6	protein_coding	ENSG00000070495	0.637999	5.74941	3.19699e-22	1.11441e-20
CHAT	protein_coding	ENSG00000070748	-1.4632	-0.281414	1.34174e-11	1.67626e-10
TESK2	protein_coding	ENSG00000070759	1.07983	2.40284	3.26974e-22	1.13812e-20
CAMK2A	protein_coding	ENSG00000070808	-1.23382	-0.182049	8.67507e-11	9.78719e-10
SLC12A3	protein_coding	ENSG00000070915	-1.52917	-2.42968	0.000370959	0.00141404
MGAT4A	protein_coding	ENSG00000071073	-1.10641	2.62663	9.49601e-23	3.4088e-21
LMCD1	protein_coding	ENSG00000071282	-1.15944	4.96962	6.5367e-53	1.21115e-50
CDH19	protein_coding	ENSG00000071991	1.68156	-2.77018	3.88089e-05	0.00018176
EPN2	protein_coding	ENSG00000072134	-0.589469	5.83358	2.78437e-17	6.36916e-16
LIMS2	protein_coding	ENSG00000072163	-0.649883	3.21231	1.74656e-11	2.15851e-10
HMMR	protein_coding	ENSG00000072571	0.670329	6.75749	7.72436e-21	2.46107e-19
NDE1	protein_coding	ENSG00000072864	1.1038	5.9372	7.03867e-62	1.74784e-59
TMEM38A	protein_coding	ENSG00000072954	-0.604669	3.17462	2.09339e-11	2.5518e-10
LLGL2	protein_coding	ENSG00000073350	-0.683638	0.171774	0.00101175	0.00347995
ABCB11	protein_coding	ENSG00000073734	1.55098	-3.61665	0.00504968	0.0144045
PTGS2	protein_coding	ENSG00000073756	-1.58009	2.00636	4.07211e-30	2.34093e-28
IGF2BP2	protein_coding	ENSG00000073792	0.621723	7.28296	1.85713e-21	6.17854e-20
NOTCH3	protein_coding	ENSG00000074181	-0.662917	6.00051	1.06382e-18	2.7762e-17
ATP2A3	protein_coding	ENSG00000074370	-0.627939	1.64549	2.09673e-06	1.23602e-05
EIF4G3	protein_coding	ENSG00000075151	0.629587	5.88456	2.78109e-21	9.20165e-20
GTSE1	protein_coding	ENSG00000075218	1.15	7.54686	8.12204e-70	2.60847e-67
SEMA3C	protein_coding	ENSG00000075223	0.832815	6.63328	5.34521e-36	4.40925e-34
ADD2	protein_coding	ENSG00000075340	0.69638	3.58706	3.49288e-13	5.26819e-12
FGF4	protein_coding	ENSG00000075388	-1.08191	-2.31672	0.00803546	0.0215439
MOCOS	protein_coding	ENSG00000075643	-0.907764	4.26916	4.22513e-29	2.28185e-27
SEC31B	protein_coding	ENSG00000075826	0.775603	2.61716	2.22573e-05	0.000109522
ARHGAP15	protein_coding	ENSG00000075884	1.96544	-2.64073	9.97058e-05	0.000430706
UNG	protein_coding	ENSG00000076248	-0.681438	5.71031	5.35866e-24	2.10218e-22
FMO4	protein_coding	ENSG00000076258	-0.603114	0.208211	0.000891712	0.0031097
PLXNA2	protein_coding	ENSG00000076356	-0.795436	5.47667	4.77444e-23	1.7451e-21
SPAG5	protein_coding	ENSG00000076382	0.61962	7.46789	7.76721e-21	2.47145e-19
DGKD	protein_coding	ENSG00000077044	-0.627067	7.3815	7.92973e-20	2.30125e-18
CTTNBP2	protein_coding	ENSG00000077063	-1.24689	1.91712	9.35107e-22	3.19036e-20
RARB	protein_coding	ENSG00000077092	-0.838072	-0.185239	0.000102863	0.000442994
NFKB2	protein_coding	ENSG00000077150	-0.62905	6.63627	1.7145e-19	4.83007e-18
PPP1R12B	protein_coding	ENSG00000077157	0.691835	4.09423	1.77761e-18	4.5502e-17
IL4R	protein_coding	ENSG00000077238	-0.816833	5.36336	2.37228e-32	1.57414e-30
FAP	protein_coding	ENSG00000078098	0.651053	3.36687	7.51769e-13	1.08495e-11
SYNJ2	protein_coding	ENSG00000078269	-0.827472	6.6569	3.91273e-35	3.12072e-33
MLLT10	protein_coding	ENSG00000078403	0.760182	5.78202	6.1625e-29	3.29127e-27
ADCYAP1R1	protein_coding	ENSG00000078549	-0.693782	1.62398	2.33165e-07	1.61776e-06
FGF20	protein_coding	ENSG00000078579	-2.38922	-3.30155	0.0018714	0.00600298
CBFA2T2	protein_coding	ENSG00000078699	0.617151	4.66359	2.48939e-17	5.72703e-16
BRINP1	protein_coding	ENSG00000078725	-0.64751	2.6028	2.95676e-10	3.10731e-09
TP73	protein_coding	ENSG00000078900	-1.60497	3.27821	1.44506e-66	4.19364e-64
MKNK1	protein_coding	ENSG00000079277	-0.651635	1.06946	1.16941e-05	6.03809e-05
CARMIL1	protein_coding	ENSG00000079691	-0.644689	4.12463	1.8364e-16	3.89378e-15
RIMS1	protein_coding	ENSG00000079841	-0.614249	0.147933	0.000860968	0.00301295
DCT	protein_coding	ENSG00000080166	1.29141	-1.45067	2.79065e-06	1.60464e-05
CNOT4	protein_coding	ENSG00000080802	0.999649	4.714	7.98924e-36	6.54547e-34
NDC80	protein_coding	ENSG00000080986	1.211	7.31605	1.91931e-61	4.7174e-59
RSBN1	protein_coding	ENSG00000081019	0.72681	4.67315	1.62092e-21	5.41515e-20
TCF7	protein_coding	ENSG00000081059	-1.16044	-1.38578	6.3115e-05	0.000284106
IMPG2	protein_coding	ENSG00000081148	0.806865	-1.02942	0.00125914	0.00423353
ARG2	protein_coding	ENSG00000081181	-0.607507	4.67075	4.08192e-16	8.41071e-15
MEF2C	protein_coding	ENSG00000081189	-1.23408	0.931514	9.20475e-12	1.18185e-10
STK17B	protein_coding	ENSG00000081320	0.983367	4.94868	2.52728e-43	3.09008e-41
CADPS2	protein_coding	ENSG00000081803	-0.591718	2.37036	7.02003e-08	5.314e-07
KCNK2	protein_coding	ENSG00000082482	-0.908877	-0.836585	0.000406416	0.00153607
XPO1	protein_coding	ENSG00000082898	0.619414	8.88778	2.19833e-20	6.77126e-19
TRPM3	protein_coding	ENSG00000083067	-0.854655	-1.75439	0.0148432	0.0365273
ULK2	protein_coding	ENSG00000083290	-0.645308	2.05307	3.76103e-08	2.96343e-07
TDRD3	protein_coding	ENSG00000083544	0.67758	3.28496	1.38267e-13	2.17533e-12
PDS5B	protein_coding	ENSG00000083642	0.605763	6.13764	1.54133e-17	3.60798e-16
CYLD	protein_coding	ENSG00000083799	-0.595534	5.35703	1.4346e-16	3.06612e-15
ZNF671	protein_coding	ENSG00000083814	0.850987	2.17199	1.42662e-13	2.23864e-12
ZNF586	protein_coding	ENSG00000083828	0.741903	2.41847	1.18614e-11	1.49585e-10
WDFY1	protein_coding	ENSG00000085449	0.660963	6.73502	3.77352e-24	1.49005e-22
ABCB1	protein_coding	ENSG00000085563	-0.76683	5.22917	2.08015e-28	1.07291e-26
WNT11	protein_coding	ENSG00000085741	-0.909072	0.36228	3.07699e-05	0.00014723
TTC39A	protein_coding	ENSG00000085831	-0.841888	1.70729	3.85105e-11	4.55153e-10
SNX10	protein_coding	ENSG00000086300	-0.823878	4.04762	2.26127e-25	9.70897e-24
NID2	protein_coding	ENSG00000087303	0.609923	1.15747	7.36192e-06	3.94059e-05
KLHL42	protein_coding	ENSG00000087448	-0.595315	6.04752	8.52578e-19	2.26168e-17
PTHLH	protein_coding	ENSG00000087494	-0.715421	4.02406	3.22007e-13	4.88425e-12
AURKA	protein_coding	ENSG00000087586	1.86111	7.66115	3.58363e-176	2.87729e-172
GP6	protein_coding	ENSG00000088053	-0.86467	2.36026	8.81815e-14	1.40757e-12
DNMT3B	protein_coding	ENSG00000088305	1.17052	4.99977	6.34605e-64	1.7175e-61
TPX2	protein_coding	ENSG00000088325	1.22335	9.01512	1.25304e-69	3.97131e-67
FER1L4	transcribed_unitary_pseudogene	ENSG00000088340	0.943038	1.98739	2.98764e-15	5.53991e-14
TMEM40	protein_coding	ENSG00000088726	-0.939823	1.29919	5.05453e-12	6.6949e-11
SIGLEC1	protein_coding	ENSG00000088827	1.06874	-2.86455	0.0127039	0.0319582
EBF4	protein_coding	ENSG00000088881	-0.692945	1.16481	5.6774e-06	3.09183e-05
LHX5	protein_coding	ENSG00000089116	-1.10382	1.23092	7.74116e-14	1.24557e-12
SIRT4	protein_coding	ENSG00000089163	0.813174	-0.654725	0.000304705	0.0011834
RPH3A	protein_coding	ENSG00000089169	1.65307	-2.70024	0.000271665	0.0010673
THPO	protein_coding	ENSG00000090534	-1.61719	-0.255658	6.84206e-14	1.10311e-12
KIF4A	protein_coding	ENSG00000090889	0.89988	7.23607	1.61399e-39	1.61984e-37
DTX2	protein_coding	ENSG00000091073	0.862151	4.61808	5.86349e-31	3.51328e-29
LAMB1	protein_coding	ENSG00000091136	0.787589	8.16676	2.62747e-34	1.96546e-32
MYO15A	protein_coding	ENSG00000091536	1.20914	-2.90403	0.00676483	0.0185946
RGS17	protein_coding	ENSG00000091844	-1.08359	2.44743	3.77683e-23	1.38889e-21
ANGPT2	protein_coding	ENSG00000091879	1.65223	-3.14575	0.000247386	0.00098411
CD200	protein_coding	ENSG00000091972	-1.70048	1.87192	4.13035e-39	4.09415e-37
G2E3	protein_coding	ENSG00000092140	1.60728	5.22307	1.97208e-112	1.90006e-109
WDR76	protein_coding	ENSG00000092470	-0.641526	4.6965	1.03296e-17	2.4708e-16
DHPS	protein_coding	ENSG00000095059	1.23009	0.96486	9.14074e-16	1.79733e-14
PDE6C	protein_coding	ENSG00000095464	-1.0141	-2.30723	0.0135695	0.0337923
IL11	protein_coding	ENSG00000095752	-2.93276	6.87358	4.69496e-49	7.43997e-47
MYO3A	protein_coding	ENSG00000095777	-0.730879	3.17428	1.1292e-15	2.19525e-14
ZNF184	protein_coding	ENSG00000096654	0.717376	3.86583	1.24467e-15	2.41e-14
ABLIM1	protein_coding	ENSG00000099204	-0.658799	7.40788	1.56567e-20	4.87869e-19
HSD17B7P2	transcribed_unprocessed_pseudogene	ENSG00000099251	0.590931	1.39047	0.000103141	0.000444032
TSPAN15	protein_coding	ENSG00000099282	-1.15694	-1.90035	0.00103512	0.0035527
MZF1	protein_coding	ENSG00000099326	0.745085	3.33053	8.46642e-14	1.35322e-12
STX1B	protein_coding	ENSG00000099365	-0.863169	2.18162	1.57269e-12	2.19476e-11
EFNA2	protein_coding	ENSG00000099617	-1.12806	1.75573	1.11662e-17	2.66033e-16
CBARP	protein_coding	ENSG00000099625	-0.75748	4.09531	1.15443e-17	2.73687e-16
PALM	protein_coding	ENSG00000099864	-0.602005	4.75129	1.29823e-15	2.50765e-14
IGF2-AS	antisense	ENSG00000099869	-1.60002	-2.60727	0.00104144	0.00357289
MED15	protein_coding	ENSG00000099917	0.610521	7.17107	7.28732e-18	1.76589e-16
SERPIND1	protein_coding	ENSG00000099937	0.708867	-1.43286	0.00940851	0.0247189
LZTR1	protein_coding	ENSG00000099949	0.59941	4.09301	1.14014e-11	1.44388e-10
CECR2	protein_coding	ENSG00000099954	-0.585088	4.63465	2.10709e-14	3.58428e-13
SUSD2	protein_coding	ENSG00000099994	0.898877	1.36949	2.03064e-11	2.4841e-10
YPEL1	protein_coding	ENSG00000100027	-0.634412	1.4186	6.31745e-06	3.41798e-05
CYTH4	protein_coding	ENSG00000100055	-1.08872	1.04156	3.64018e-14	6.04696e-13
MFNG	protein_coding	ENSG00000100060	-0.653762	2.71289	5.85804e-09	5.18188e-08
CARD10	protein_coding	ENSG00000100065	-0.615448	6.57936	4.40316e-20	1.32408e-18
PIK3IP1	protein_coding	ENSG00000100100	0.929665	2.1095	2.58869e-10	2.74203e-09
CCDC134	protein_coding	ENSG00000100147	0.699405	3.18583	7.19239e-15	1.28328e-13
TTC28	protein_coding	ENSG00000100154	0.669271	3.93643	7.70993e-16	1.53352e-14
2019-09-03	protein_coding	ENSG00000100167	-0.782708	3.71024	1.1371e-19	3.25674e-18
CYP2D6	protein_coding	ENSG00000100197	0.712722	-0.297006	0.000685036	0.00244923
RAB36	protein_coding	ENSG00000100228	-0.86761	3.59629	1.58351e-23	5.98215e-22
SUN2	protein_coding	ENSG00000100242	0.947112	6.49345	3.18747e-44	4.21849e-42
CHKB	protein_coding	ENSG00000100288	1.02331	-1.23619	0.00055124	0.00201238
BIK	protein_coding	ENSG00000100290	-1.39555	-0.053418	6.57162e-11	7.52546e-10
RASD2	protein_coding	ENSG00000100302	-1.78108	2.60946	2.15797e-56	4.36799e-54
PDGFB	protein_coding	ENSG00000100311	-2.63459	2.35616	7.14228e-109	6.61677e-106
CABP7	protein_coding	ENSG00000100314	-0.688645	1.53654	4.38768e-08	3.41474e-07
PNPLA5	protein_coding	ENSG00000100341	-1.6825	-2.88767	0.000240244	0.000958071
TNRC6B	protein_coding	ENSG00000100354	0.98266	6.46379	6.14607e-43	7.32873e-41
PVALB	protein_coding	ENSG00000100362	-0.998055	0.0315783	4.10812e-07	2.735e-06
CSF2RB	protein_coding	ENSG00000100368	-1.16424	-2.19336	0.00135573	0.00452355
FAM118A	protein_coding	ENSG00000100376	0.657693	5.794	3.17703e-18	7.93828e-17
CHADL	protein_coding	ENSG00000100399	-1.73048	-3.6954	0.0145914	0.0359847
TRMU	protein_coding	ENSG00000100416	0.782164	6.1834	2.23162e-34	1.67455e-32
HDAC10	protein_coding	ENSG00000100429	1.25196	-1.0072	3.3231e-07	2.25094e-06
KCNK10	protein_coding	ENSG00000100433	-0.822441	-0.758209	0.000918105	0.00319414
GZMB	protein_coding	ENSG00000100453	1.15818	-0.739157	2.26461e-07	1.57515e-06
CDKN3	protein_coding	ENSG00000100526	0.73399	6.60291	3.3139e-26	1.49479e-24
CCDC198	protein_coding	ENSG00000100557	-0.736666	0.254286	0.000307014	0.00119141
KIAA0586	protein_coding	ENSG00000100578	0.617772	5.73608	4.33963e-18	1.07099e-16
ASB2	protein_coding	ENSG00000100628	-2.49093	-1.6951	4.32946e-12	5.7775e-11
PPP4R3A	protein_coding	ENSG00000100796	0.838626	6.64228	6.20427e-37	5.39502e-35
PCK2	protein_coding	ENSG00000100889	-0.695505	5.34935	3.67448e-24	1.45332e-22
KIAA0391	protein_coding	ENSG00000100890	0.737444	2.37357	2.20111e-13	3.38591e-12
NFKBIA	protein_coding	ENSG00000100906	-0.905118	4.74015	2.41402e-16	5.07386e-15
REC8	protein_coding	ENSG00000100918	0.923219	0.886316	1.12144e-08	9.55166e-08
SALL4	protein_coding	ENSG00000101115	0.789047	2.52824	4.76917e-13	7.04322e-12
DOK5	protein_coding	ENSG00000101134	-1.33863	3.82651	3.55056e-63	9.19595e-61
CSTF1	protein_coding	ENSG00000101138	0.665042	5.67017	2.20994e-24	8.8866e-23
BIRC7	protein_coding	ENSG00000101197	1.46987	-1.30487	5.87576e-10	5.94162e-09
CDC25B	protein_coding	ENSG00000101224	0.816951	6.81985	2.49766e-37	2.23647e-35
SLC52A3	protein_coding	ENSG00000101276	0.846967	-2.02758	0.00939415	0.0246946
PROKR2	protein_coding	ENSG00000101292	-1.28798	0.0508526	1.59764e-11	1.98261e-10
MYLK2	protein_coding	ENSG00000101306	0.984324	0.759937	1.30964e-09	1.26586e-08
CCM2L	protein_coding	ENSG00000101331	-0.660569	0.482045	0.000158629	0.000656139
PLCB4	protein_coding	ENSG00000101333	0.784074	1.43398	2.01511e-09	1.9027e-08
E2F1	protein_coding	ENSG00000101412	-0.762282	5.39994	2.59599e-28	1.32759e-26
SLC32A1	protein_coding	ENSG00000101438	-1.24953	-2.0439	0.00595835	0.0166515
PPP1R16B	protein_coding	ENSG00000101445	-1.60344	2.57257	5.072e-39	5.00693e-37
FAM83D	protein_coding	ENSG00000101447	1.85511	6.36616	3.10843e-174	1.87182e-170
SYNDIG1	protein_coding	ENSG00000101463	-1.00745	-0.0738206	5.5108e-06	3.00858e-05
CELF4	protein_coding	ENSG00000101489	-1.58568	0.756687	6.43067e-19	1.71915e-17
METTL4	protein_coding	ENSG00000101574	0.636784	4.8267	9.18835e-19	2.42409e-17
MYOM1	protein_coding	ENSG00000101605	-0.682084	1.25341	6.04066e-06	3.27927e-05
CEP192	protein_coding	ENSG00000101639	0.646985	6.79105	3.15951e-23	1.16544e-21
LIPG	protein_coding	ENSG00000101670	-1.75878	-3.82763	0.0126294	0.0318106
RNF125	protein_coding	ENSG00000101695	-0.962116	1.61238	1.36192e-10	1.49998e-09
ANKRD12	protein_coding	ENSG00000101745	0.687966	5.74349	3.7753e-21	1.23386e-19
NOL4	protein_coding	ENSG00000101746	-1.21692	-1.2527	0.000332979	0.00128218
RBBP8	protein_coding	ENSG00000101773	-0.799286	6.09999	3.61065e-28	1.83094e-26
GPR143	protein_coding	ENSG00000101850	1.0226	-3.21289	0.0185894	0.044254
ZDHHC15	protein_coding	ENSG00000102383	-0.657176	1.69611	9.57718e-08	7.09802e-07
CENPI	protein_coding	ENSG00000102384	0.672096	4.68912	1.41044e-19	4.00156e-18
DRP2	protein_coding	ENSG00000102385	1.50766	2.13433	3.87284e-37	3.4296e-35
RUBCNL	protein_coding	ENSG00000102445	-1.60606	-1.43102	1.21328e-06	7.46849e-06
HTR2A	protein_coding	ENSG00000102468	1.45398	-0.0190463	8.35391e-12	1.07893e-10
TNFSF13B	protein_coding	ENSG00000102524	1.84632	-3.78088	0.00393066	0.011563
CDADC1	protein_coding	ENSG00000102543	1.00366	2.38273	4.41394e-19	1.19728e-17
KLF5	protein_coding	ENSG00000102554	-0.654948	6.41082	6.95126e-18	1.68785e-16
FGF9	protein_coding	ENSG00000102678	-1.78606	-0.551123	1.43885e-07	1.03703e-06
PARP4	protein_coding	ENSG00000102699	0.592106	6.51136	8.72612e-19	2.30467e-17
SUPT20H	protein_coding	ENSG00000102710	0.605742	5.37241	2.56058e-18	6.44481e-17
RGCC	protein_coding	ENSG00000102760	-1.12366	0.481412	3.38564e-09	3.08901e-08
GDPD3	protein_coding	ENSG00000102886	0.688849	0.58941	0.000194512	0.000788621
NFAT5	protein_coding	ENSG00000102908	0.602559	6.25493	9.4555e-18	2.27527e-16
CTCF	protein_coding	ENSG00000102974	0.623402	6.92036	1.5304e-20	4.78115e-19
CCDC113	protein_coding	ENSG00000103021	-0.587871	2.69186	5.76923e-08	4.41294e-07
SLC7A6OS	protein_coding	ENSG00000103061	0.632162	4.94681	3.91828e-19	1.07006e-17
MLYCD	protein_coding	ENSG00000103150	-1.17642	1.14624	9.91575e-17	2.14592e-15
CRISPLD2	protein_coding	ENSG00000103196	-0.760397	3.14112	1.21001e-17	2.8602e-16
ZNF174	protein_coding	ENSG00000103343	0.603299	3.31715	3.18243e-11	3.80045e-10
IL21R	protein_coding	ENSG00000103522	-0.658233	1.31119	1.77098e-05	8.86299e-05
SLC6A2	protein_coding	ENSG00000103546	-1.69415	-2.66367	0.000289878	0.00113165
RASL12	protein_coding	ENSG00000103710	-3.86644	-3.12199	5.48032e-10	5.56981e-09
AP3B2	protein_coding	ENSG00000103723	-0.699275	1.5465	2.03848e-08	1.67809e-07
ACSBG1	protein_coding	ENSG00000103740	0.932768	0.972671	2.95925e-12	4.02936e-11
GOLGA8UP	unprocessed_pseudogene	ENSG00000103832	0.877008	-0.506063	0.000390528	0.0014816
CEMIP	protein_coding	ENSG00000103888	-1.18344	3.78517	1.05299e-46	1.49196e-44
ZNF106	protein_coding	ENSG00000103994	0.617746	7.33181	2.83952e-19	7.83453e-18
OCA2	protein_coding	ENSG00000104044	-1.11088	-1.57557	0.000862897	0.00301882
FAM189A1	protein_coding	ENSG00000104059	1.78558	-1.14286	2.37778e-13	3.65032e-12
CSPP1	protein_coding	ENSG00000104218	0.603965	5.059	1.82603e-18	4.65436e-17
CA2	protein_coding	ENSG00000104267	-1.6112	2.96411	1.27773e-53	2.40443e-51
EYA1	protein_coding	ENSG00000104313	0.617869	1.81683	1.81985e-06	1.08582e-05
JPH1	protein_coding	ENSG00000104369	-1.46942	2.98729	1.81653e-43	2.26709e-41
WISP1	protein_coding	ENSG00000104415	-0.781725	1.82973	6.55191e-11	7.50789e-10
SPAG1	protein_coding	ENSG00000104450	-0.667055	4.84584	6.72387e-20	1.97269e-18
UBR5	protein_coding	ENSG00000104517	0.741183	7.72312	1.92461e-28	9.97113e-27
SQLE	protein_coding	ENSG00000104549	0.665569	8.25792	1.39052e-22	4.93278e-21
SH2D4A	protein_coding	ENSG00000104611	-1.6153	-2.95968	0.0186241	0.0443148
RELB	protein_coding	ENSG00000104856	-1.5537	4.67923	2.50559e-74	9.14427e-72
DMPK	protein_coding	ENSG00000104936	0.607666	4.91236	2.90605e-08	2.32861e-07
IL4I1	protein_coding	ENSG00000104951	-0.659768	0.519807	7.90091e-05	0.000349191
NOVA2	protein_coding	ENSG00000104967	0.59022	3.58522	1.15632e-09	1.12762e-08
SLC1A6	protein_coding	ENSG00000105143	-1.08852	0.332492	2.45156e-08	1.99092e-07
CCNE1	protein_coding	ENSG00000105173	-0.693124	6.31855	5.5904e-25	2.33372e-23
TJP3	protein_coding	ENSG00000105289	-0.984735	-0.880984	0.000184673	0.000752915
CNFN	protein_coding	ENSG00000105427	-0.75038	0.0778762	0.000205585	0.000830581
CYTH2	protein_coding	ENSG00000105443	0.690945	5.67115	2.45969e-23	9.143e-22
CARD8	protein_coding	ENSG00000105483	0.64271	4.45295	1.38267e-17	3.24603e-16
HAS1	protein_coding	ENSG00000105509	-3.75516	-3.46708	8.09892e-07	5.11615e-06
RASIP1	protein_coding	ENSG00000105538	-1.02534	0.383433	2.02992e-08	1.67161e-07
FGF21	protein_coding	ENSG00000105550	-1.36313	1.23492	1.26576e-10	1.39983e-09
TNPO2	protein_coding	ENSG00000105576	0.619782	6.27373	1.04434e-21	3.54794e-20
CACNG7	protein_coding	ENSG00000105605	0.678511	3.73004	3.6299e-15	6.65906e-14
GRIK5	protein_coding	ENSG00000105737	0.673146	0.0374904	0.000149378	0.000620677
RUNDC3B	protein_coding	ENSG00000105784	-1.58275	-3.31012	0.0137536	0.0341846
RASA4	protein_coding	ENSG00000105808	-0.72506	-0.543824	0.00575914	0.0161641
DNAJC2	protein_coding	ENSG00000105821	0.708288	6.74576	1.65478e-23	6.23766e-22
PIK3CG	protein_coding	ENSG00000105851	1.62423	-1.07871	1.14636e-09	1.11836e-08
CBLL1	protein_coding	ENSG00000105879	0.606191	5.31248	1.67231e-16	3.55526e-15
ATP6V0A4	protein_coding	ENSG00000105929	0.66387	2.33016	1.2985e-10	1.43472e-09
ZC3HAV1	protein_coding	ENSG00000105939	0.624883	5.93603	3.20323e-21	1.05261e-19
ADAP1	protein_coding	ENSG00000105963	-0.843128	0.151811	2.88563e-05	0.000138707
TFEC	protein_coding	ENSG00000105967	0.809494	0.210747	2.87661e-05	0.000138301
DNAJB6	protein_coding	ENSG00000105993	0.612141	7.01909	2.38185e-20	7.32716e-19
HOXA2	protein_coding	ENSG00000105996	-0.940213	-1.58237	0.00993182	0.0258569
HOXA3	protein_coding	ENSG00000105997	-1.09291	1.37853	2.79989e-12	3.82102e-11
LFNG	protein_coding	ENSG00000106003	-0.981527	7.02716	1.60208e-44	2.14385e-42
GRB10	protein_coding	ENSG00000106070	-0.604049	6.36137	1.26227e-19	3.6024e-18
COBL	protein_coding	ENSG00000106078	-1.56663	5.28957	2.22167e-95	1.44631e-92
SERPINE1	protein_coding	ENSG00000106366	-0.880418	8.37412	1.3958e-42	1.65619e-40
NRF1	protein_coding	ENSG00000106459	0.782214	3.87545	3.70355e-22	1.27988e-20
SFRP4	protein_coding	ENSG00000106483	-1.15032	0.59812	8.5237e-10	8.45246e-09
PSMA2	protein_coding	ENSG00000106588	0.919144	2.43724	1.27685e-16	2.73869e-15
SPATA6L	protein_coding	ENSG00000106686	-0.631024	0.776071	3.19285e-05	0.000152259
SLC1A1	protein_coding	ENSG00000106688	-0.94442	0.353612	1.08216e-06	6.71517e-06
NMRK1	protein_coding	ENSG00000106733	-0.604406	1.92165	4.21561e-07	2.80037e-06
PRUNE2	protein_coding	ENSG00000106772	-0.85854	3.20684	3.3421e-17	7.5873e-16
CORO2A	protein_coding	ENSG00000106789	-0.727362	4.99118	3.61682e-22	1.2517e-20
C5	protein_coding	ENSG00000106804	-0.833917	0.159351	1.50743e-05	7.63608e-05
ECM2	protein_coding	ENSG00000106823	-1.95954	0.561125	4.48609e-21	1.45237e-19
ELAVL2	protein_coding	ENSG00000107105	-0.96672	3.78226	6.91147e-26	3.08862e-24
GLIS3	protein_coding	ENSG00000107249	0.634699	0.0296841	0.00027067	0.00106391
APBA1	protein_coding	ENSG00000107282	-0.632338	2.14207	2.69152e-08	2.1668e-07
SH3GL2	protein_coding	ENSG00000107295	-0.732676	1.74777	4.42663e-09	3.97258e-08
PDLIM1	protein_coding	ENSG00000107438	-0.78652	4.58212	1.97468e-26	8.99132e-25
CXCL12	protein_coding	ENSG00000107562	-0.801256	-0.641086	0.00258117	0.00800884
UNC5B	protein_coding	ENSG00000107731	-0.731106	3.84409	2.64622e-17	6.07622e-16
NEURL1	protein_coding	ENSG00000107954	-1.49662	0.107229	2.45267e-13	3.75811e-12
DKK1	protein_coding	ENSG00000107984	-0.78031	0.807581	2.46938e-06	1.43463e-05
EBF3	protein_coding	ENSG00000108001	-1.0929	3.14706	1.92171e-26	8.76669e-25
NUFIP2	protein_coding	ENSG00000108256	0.586621	8.03293	1.13159e-17	2.69069e-16
CSF3	protein_coding	ENSG00000108342	-1.87194	-3.69482	0.00402275	0.011785
RAPGEFL1	protein_coding	ENSG00000108352	0.664735	3.33655	3.10343e-09	2.85097e-08
P2RX1	protein_coding	ENSG00000108405	-0.710891	-1.32349	0.00609389	0.0169692
TUBD1	protein_coding	ENSG00000108423	1.08794	4.20453	4.25321e-42	4.87843e-40
MED13	protein_coding	ENSG00000108510	0.6371	7.73646	2.07744e-20	6.42353e-19
HOXB6	protein_coding	ENSG00000108511	1.43506	4.45397	7.60815e-32	4.78479e-30
ALDH3A1	protein_coding	ENSG00000108602	-0.632723	-0.641541	0.00712163	0.0194202
ASIC2	protein_coding	ENSG00000108684	-0.904198	0.385378	3.62729e-06	2.04639e-05
CCL7	protein_coding	ENSG00000108688	-1.18966	-1.45087	3.48803e-05	0.000165126
CCL2	protein_coding	ENSG00000108691	-2.00148	5.02625	3.13976e-21	1.03316e-19
SGCA	protein_coding	ENSG00000108823	-1.52893	-2.5545	0.00331991	0.00997836
HDAC5	protein_coding	ENSG00000108840	-0.947265	4.98034	1.99217e-38	1.89666e-36
SLC16A6	protein_coding	ENSG00000108932	-1.84516	0.802409	3.94245e-20	1.19149e-18
WSB1	protein_coding	ENSG00000109046	0.81893	6.51051	7.66023e-33	5.2122e-31
KIAA1211	protein_coding	ENSG00000109265	-0.865394	3.46358	5.66666e-21	1.82234e-19
NFKB1	protein_coding	ENSG00000109320	-1.28904	6.43126	1.90553e-60	4.41331e-58
AREG	protein_coding	ENSG00000109321	-1.47697	5.79866	3.11741e-19	8.57218e-18
SLC2A9	protein_coding	ENSG00000109667	-0.646096	-1.27248	0.0186391	0.0443461
NEIL3	protein_coding	ENSG00000109674	0.645687	3.51629	2.56294e-14	4.32004e-13
GLRB	protein_coding	ENSG00000109738	-1.00699	3.65663	6.19781e-32	3.94938e-30
FAM149A	protein_coding	ENSG00000109794	-0.799835	0.960925	5.80396e-07	3.76211e-06
NCAPG	protein_coding	ENSG00000109805	0.723766	6.23443	2.06466e-26	9.3833e-25
DBX1	protein_coding	ENSG00000109851	-2.23213	-3.55277	0.00564471	0.0158929
FNBP4	protein_coding	ENSG00000109920	0.92301	6.92943	7.75343e-47	1.11165e-44
B3GAT1	protein_coding	ENSG00000109956	-0.818704	3.32274	2.94341e-21	9.72536e-20
HSPA8	protein_coding	ENSG00000109971	0.808839	11.1318	1.47059e-32	9.83948e-31
LPXN	protein_coding	ENSG00000110031	0.953389	4.14236	2.52595e-36	2.13482e-34
DTX4	protein_coding	ENSG00000110042	-0.623493	4.27579	9.56883e-15	1.6836e-13
MS4A6A	protein_coding	ENSG00000110077	1.70683	-4.37656	0.0193564	0.0458174
CCKBR	protein_coding	ENSG00000110148	-0.81	-0.699516	0.000615042	0.00222473
CHORDC1	protein_coding	ENSG00000110172	0.889422	7.57965	9.3621e-38	8.64004e-36
CEP164	protein_coding	ENSG00000110274	0.747651	5.86447	2.03913e-29	1.12138e-27
KIAA1549L	protein_coding	ENSG00000110427	0.674991	6.18052	7.28609e-24	2.80351e-22
PTPMT1	protein_coding	ENSG00000110536	-0.669169	2.3562	1.69658e-09	1.61269e-08
EXPH5	protein_coding	ENSG00000110723	1.29456	4.40105	7.72978e-61	1.86187e-58
POU2AF1	protein_coding	ENSG00000110777	-0.906987	-1.09743	0.00309057	0.00937329
CLEC2B	protein_coding	ENSG00000110852	0.880346	3.90747	7.63791e-24	2.93111e-22
MVK	protein_coding	ENSG00000110921	0.670609	4.8013	5.62829e-20	1.67576e-18
IL23A	protein_coding	ENSG00000110944	-1.53014	-0.356254	8.10581e-10	8.08131e-09
SYT10	protein_coding	ENSG00000110975	-1.16697	-0.829911	1.80667e-05	9.02474e-05
RSRC2	protein_coding	ENSG00000111011	0.758673	6.80106	6.89503e-29	3.66624e-27
LIN7A	protein_coding	ENSG00000111052	-0.895144	2.3924	8.40781e-16	1.66272e-14
PPM1H	protein_coding	ENSG00000111110	-0.622774	1.74076	2.74328e-07	1.88201e-06
SLC6A12	protein_coding	ENSG00000111181	-0.754187	0.128291	0.000430185	0.00161601
WNT5B	protein_coding	ENSG00000111186	-1.1707	2.45717	2.57301e-24	1.02779e-22
ITFG2	protein_coding	ENSG00000111203	0.793402	4.04198	1.89594e-24	7.68815e-23
SH2B3	protein_coding	ENSG00000111252	-0.817306	7.10087	1.72569e-34	1.30713e-32
AKAP3	protein_coding	ENSG00000111254	-0.687652	-0.722743	0.00790849	0.0212601
KCNA1	protein_coding	ENSG00000111262	-2.62569	3.72041	1.47495e-134	2.96059e-131
CDKN1B	protein_coding	ENSG00000111276	0.664401	4.94213	1.44421e-21	4.85847e-20
LTBR	protein_coding	ENSG00000111321	0.593349	6.45801	6.44885e-20	1.90127e-18
OAS3	protein_coding	ENSG00000111331	-0.667249	4.70424	3.21428e-17	7.304e-16
IFNG	protein_coding	ENSG00000111537	-1.92913	-3.18564	0.000314439	0.00121728
CNOT2	protein_coding	ENSG00000111596	0.725788	5.43343	4.68319e-23	1.71435e-21
NOP2	protein_coding	ENSG00000111641	0.824462	1.50585	8.66516e-09	7.48897e-08
GNB3	protein_coding	ENSG00000111664	1.0685	2.47456	0.000178232	0.000728629
CDCA3	protein_coding	ENSG00000111665	1.46316	6.20605	1.20453e-98	8.53337e-96
HCFC2	protein_coding	ENSG00000111727	0.774106	3.6102	6.27313e-21	2.012e-19
MAK	protein_coding	ENSG00000111837	-0.917307	-0.326121	5.22565e-05	0.000239251
GCNT2	protein_coding	ENSG00000111846	0.59472	1.33187	7.78604e-06	4.14366e-05
NEDD9	protein_coding	ENSG00000111859	-0.6185	5.48476	1.10517e-19	3.16908e-18
MAN1A1	protein_coding	ENSG00000111885	-0.591339	6.14826	2.85066e-17	6.5146e-16
RIPOR2	protein_coding	ENSG00000111913	-2.15021	3.23216	9.23882e-101	6.95423e-98
PPARD	protein_coding	ENSG00000112033	-0.665303	6.04147	4.85759e-23	1.7728e-21
SOD2	protein_coding	ENSG00000112096	-0.71648	5.55786	1.12259e-23	4.28522e-22
PHACTR1	protein_coding	ENSG00000112137	0.621817	1.39514	1.61108e-06	9.69181e-06
MDGA1	protein_coding	ENSG00000112139	-0.882253	3.77397	5.89978e-28	2.95443e-26
CD83	protein_coding	ENSG00000112149	-1.96596	4.05382	2.59337e-117	2.71593e-114
BACH2	protein_coding	ENSG00000112182	-0.881147	2.76433	6.70703e-19	1.78906e-17
PTP4A1	protein_coding	ENSG00000112245	-0.874989	-1.69112	0.0145988	0.0359994
ARFGEF3	protein_coding	ENSG00000112379	-0.687654	4.60909	6.63952e-20	1.95032e-18
PDE10A	protein_coding	ENSG00000112541	-0.845282	5.29323	1.03227e-33	7.42219e-32
TFEB	protein_coding	ENSG00000112561	-0.666481	2.7208	7.06393e-11	8.04867e-10
PPP2R5D	protein_coding	ENSG00000112640	0.640647	6.65074	6.63146e-22	2.27863e-20
PRPF4B	protein_coding	ENSG00000112739	0.877081	6.75261	2.00138e-36	1.69744e-34
TTK	protein_coding	ENSG00000112742	1.38323	5.56824	6.57075e-88	3.5171e-85
BTN2A1	protein_coding	ENSG00000112763	0.592687	4.82982	7.81381e-16	1.55162e-14
ENPP5	protein_coding	ENSG00000112796	-1.14668	1.59411	7.19545e-17	1.57848e-15
BRD8	protein_coding	ENSG00000112983	1.31195	6.82163	7.74862e-87	3.809e-84
KIF20A	protein_coding	ENSG00000112984	2.24883	7.52609	8.87888e-228	1.06933e-223
HBEGF	protein_coding	ENSG00000113070	-1.44869	6.81763	2.69497e-38	2.55566e-36
HMGCR	protein_coding	ENSG00000113161	0.85397	7.06274	6.83065e-35	5.37679e-33
ITK	protein_coding	ENSG00000113263	-0.86768	1.19219	1.65894e-07	1.18397e-06
THG1L	protein_coding	ENSG00000113272	0.631285	4.41363	1.33812e-16	2.86755e-15
LMNB1	protein_coding	ENSG00000113368	0.805304	8.35272	2.08872e-32	1.38981e-30
ARRDC3	protein_coding	ENSG00000113369	-0.895575	4.56489	8.15724e-20	2.36442e-18
IRX4	protein_coding	ENSG00000113430	-1.3658	1.68475	2.4031e-22	8.4873e-21
IL4	protein_coding	ENSG00000113520	-1.44895	-3.16968	0.00865518	0.0229601
FGF1	protein_coding	ENSG00000113578	-0.851867	6.69079	9.89885e-30	5.54497e-28
TCERG1	protein_coding	ENSG00000113649	0.868397	7.61129	1.06967e-38	1.03475e-36
PDGFRB	protein_coding	ENSG00000113721	-0.982559	6.07956	4.19393e-51	7.21566e-49
SMC4	protein_coding	ENSG00000113810	0.845034	8.51729	1.57988e-32	1.05414e-30
CEP70	protein_coding	ENSG00000114107	0.594842	4.95653	4.5187e-12	6.02002e-11
KAT2B	protein_coding	ENSG00000114166	-0.960361	4.16218	1.20869e-32	8.1323e-31
COL7A1	protein_coding	ENSG00000114270	0.825338	5.61529	0.00116833	0.00395912
FGF12	protein_coding	ENSG00000114279	-0.687599	2.64467	1.11989e-11	1.41897e-10
ECT2	protein_coding	ENSG00000114346	0.870997	7.41007	2.76944e-38	2.61598e-36
FXR1	protein_coding	ENSG00000114416	0.701739	7.92018	2.18638e-25	9.43787e-24
CBLB	protein_coding	ENSG00000114423	-1.28418	3.58358	3.47587e-47	5.13639e-45
ROPN1B	protein_coding	ENSG00000114547	-1.10892	-0.690704	3.84861e-05	0.000180423
CSPG5	protein_coding	ENSG00000114646	-0.658766	3.78245	9.51011e-16	1.86387e-14
EFCC1	protein_coding	ENSG00000114654	-0.808603	-0.900347	0.00519703	0.0147723
PEX5L	protein_coding	ENSG00000114757	-1.28535	-2.20847	0.00841638	0.0224047
PLCH1	protein_coding	ENSG00000114805	1.62303	0.461902	1.09403e-21	3.70633e-20
VIPR1	protein_coding	ENSG00000114812	-0.629896	0.318245	0.000424709	0.00159718
NKTR	protein_coding	ENSG00000114857	0.901136	6.96539	8.35252e-44	1.07014e-41
IL1A	protein_coding	ENSG00000115008	-0.661805	0.404565	0.00167812	0.00546153
CCL20	protein_coding	ENSG00000115009	-2.77894	4.56413	1.47081e-23	5.57912e-22
ZAP70	protein_coding	ENSG00000115085	1.07681	-2.31427	0.00188746	0.00604725
CENPA	protein_coding	ENSG00000115163	1.32055	6.2686	2.71567e-87	1.36276e-84
ELMOD3	protein_coding	ENSG00000115459	0.673097	4.11478	2.86419e-18	7.18644e-17
EHBP1	protein_coding	ENSG00000115504	0.800878	6.11048	1.70351e-31	1.05212e-29
OTX1	protein_coding	ENSG00000115507	-0.671747	1.63656	9.91324e-08	7.32679e-07
ST3GAL5	protein_coding	ENSG00000115525	-0.86363	3.36223	1.54762e-23	5.86124e-22
KDM3A	protein_coding	ENSG00000115548	0.731584	5.29624	7.33994e-25	3.03775e-23
WNT6	protein_coding	ENSG00000115596	-1.10281	2.07896	1.53848e-16	3.28232e-15
SLC9A2	protein_coding	ENSG00000115616	-1.47754	2.20898	5.21018e-29	2.80129e-27
SLC5A7	protein_coding	ENSG00000115665	-1.88106	-4.09093	0.00981168	0.0255828
TPO	protein_coding	ENSG00000115705	1.35604	-0.870186	4.32902e-10	4.45802e-09
ID2	protein_coding	ENSG00000115738	-0.827198	3.22793	3.40105e-18	8.46292e-17
BIRC6	protein_coding	ENSG00000115760	0.606138	7.44819	2.92184e-15	5.42207e-14
LCT	protein_coding	ENSG00000115850	-0.872268	-1.61895	0.00817067	0.0218529
SLC1A4	protein_coding	ENSG00000115902	-0.699801	6.11081	3.7385e-27	1.78669e-25
PLEK	protein_coding	ENSG00000115956	-1.18992	-2.12504	0.000477066	0.00176976
ATF2	protein_coding	ENSG00000115966	0.678505	5.37926	1.01547e-22	3.62904e-21
THADA	protein_coding	ENSG00000115970	0.733221	5.60058	3.32325e-28	1.68876e-26
AAK1	protein_coding	ENSG00000115977	0.989987	6.60305	3.23731e-52	5.86295e-50
CD207	protein_coding	ENSG00000116031	-0.829366	-1.21017	0.00463426	0.0133443
PRRX1	protein_coding	ENSG00000116132	-0.808455	2.72947	5.10411e-16	1.03749e-14
MARK1	protein_coding	ENSG00000116141	-0.818914	3.94424	3.29304e-23	1.21283e-21
TCEANC2	protein_coding	ENSG00000116205	0.773351	3.44208	1.87689e-18	4.77893e-17
ERRFI1	protein_coding	ENSG00000116285	-0.942063	7.07569	8.13848e-07	5.13979e-06
OPRD1	protein_coding	ENSG00000116329	-1.16918	1.79509	2.91427e-22	1.02178e-20
SRSF4	protein_coding	ENSG00000116350	0.736021	6.66091	1.07061e-28	5.60601e-27
KCNC4	protein_coding	ENSG00000116396	-0.751659	4.71481	7.54311e-21	2.40969e-19
ASH1L	protein_coding	ENSG00000116539	0.738829	7.09473	1.00795e-26	4.70512e-25
DLGAP3	protein_coding	ENSG00000116544	-0.763301	2.22051	1.15719e-10	1.28804e-09
DNAJC6	protein_coding	ENSG00000116675	-0.947018	3.61313	4.07822e-27	1.94134e-25
MIIP	protein_coding	ENSG00000116691	0.75428	4.3	3.11754e-19	8.57218e-18
RGS2	protein_coding	ENSG00000116741	-1.37699	4.05444	1.37707e-09	1.32784e-08
CTH	protein_coding	ENSG00000116761	-1.3194	3.88671	5.41826e-50	8.93902e-48
C1orf109	protein_coding	ENSG00000116922	0.610207	5.34207	2.21196e-17	5.12795e-16
ZNF684	protein_coding	ENSG00000117010	0.744993	2.36272	1.99873e-13	3.09605e-12
KCNQ4	protein_coding	ENSG00000117013	1.05251	-0.168198	4.06048e-08	3.17961e-07
KDM5B	protein_coding	ENSG00000117139	0.624383	6.28137	3.05651e-21	1.00852e-19
ACTL8	protein_coding	ENSG00000117148	1.20088	-0.942717	1.38503e-07	1.00003e-06
RGS4	protein_coding	ENSG00000117152	-1.69171	5.76931	2.12574e-14	3.61091e-13
GBP1	protein_coding	ENSG00000117228	-1.24596	2.34219	4.00796e-30	2.3151e-28
ID3	protein_coding	ENSG00000117318	-1.57034	5.46073	1.98797e-75	7.48191e-73
PRPF3	protein_coding	ENSG00000117360	0.789169	6.30689	2.24876e-33	1.57918e-31
CDC20	protein_coding	ENSG00000117399	1.32895	8.52592	1.06924e-92	6.28167e-90
ARTN	protein_coding	ENSG00000117407	0.89522	-1.86132	0.00715676	0.0195006
PIK3R3	protein_coding	ENSG00000117461	1.01913	3.43389	1.71648e-27	8.32872e-26
FAAH	protein_coding	ENSG00000117480	0.784186	0.0922502	7.07299e-05	0.000315495
PRRC2C	protein_coding	ENSG00000117523	0.743029	8.86769	4.10099e-25	1.72392e-23
F3	protein_coding	ENSG00000117525	-1.39638	4.9238	5.22951e-32	3.368e-30
FASLG	protein_coding	ENSG00000117560	-1.86022	-2.82286	0.000691915	0.00247162
PLPPR4	protein_coding	ENSG00000117600	-0.903921	0.0963111	3.55751e-06	2.0115e-05
RSRP1	protein_coding	ENSG00000117616	0.972656	5.98643	6.03174e-44	7.93915e-42
MAN1C1	protein_coding	ENSG00000117643	-0.979379	2.35925	1.27141e-20	3.98755e-19
NEK2	protein_coding	ENSG00000117650	1.5305	6.48186	1.17003e-97	8.05211e-95
ARID1A	protein_coding	ENSG00000117713	0.660349	6.50295	7.03096e-20	2.05777e-18
CENPF	protein_coding	ENSG00000117724	1.53815	8.92228	5.2432e-65	1.45164e-62
KMT2A	protein_coding	ENSG00000118058	0.619346	6.37969	1.50705e-19	4.26061e-18
KIF14	protein_coding	ENSG00000118193	1.35102	6.51159	2.68608e-85	1.24423e-82
NRP2	protein_coding	ENSG00000118257	-0.755467	-0.370009	0.0010773	0.00368102
FILIP1	protein_coding	ENSG00000118407	1.44404	-1.65182	1.16093e-05	5.99683e-05
TNFAIP3	protein_coding	ENSG00000118503	-1.46207	5.23632	6.01833e-14	9.76186e-13
MYB	protein_coding	ENSG00000118513	-2.19463	0.835874	1.23114e-36	1.05157e-34
TCF21	protein_coding	ENSG00000118526	-1.62499	-1.43936	9.90276e-08	7.32129e-07
KLF12	protein_coding	ENSG00000118922	-0.626015	4.92578	3.44524e-18	8.56403e-17
ELL2	protein_coding	ENSG00000118985	-0.8416	7.12191	2.35431e-23	8.76481e-22
PIGZ	protein_coding	ENSG00000119227	-0.695639	-0.933508	0.0068043	0.0186818
C1orf198	protein_coding	ENSG00000119280	-0.833075	5.41659	2.55706e-33	1.79046e-31
CNTRL	protein_coding	ENSG00000119397	1.4683	5.37884	1.87844e-78	7.80102e-76
NR4A3	protein_coding	ENSG00000119508	-2.56194	3.75784	9.94079e-29	5.23947e-27
GALNT12	protein_coding	ENSG00000119514	-0.697127	-0.541549	0.00153462	0.00505185
DENND1A	protein_coding	ENSG00000119522	0.618578	4.14374	4.67568e-15	8.47427e-14
ACYP1	protein_coding	ENSG00000119640	-0.712607	3.34369	1.39108e-15	2.68055e-14
IRF2BPL	protein_coding	ENSG00000119669	-0.861541	6.03822	7.97422e-34	5.78539e-32
RBM25	protein_coding	ENSG00000119707	0.83903	8.56974	6.99496e-36	5.75043e-34
GPR68	protein_coding	ENSG00000119714	-2.12503	-4.09187	0.0145031	0.0357999
ESRRB	protein_coding	ENSG00000119715	0.912861	-0.116354	1.07447e-05	5.58499e-05
NRDE2	protein_coding	ENSG00000119720	0.726319	3.78659	2.90189e-19	7.99746e-18
GPR75	protein_coding	ENSG00000119737	0.742524	2.56936	5.4353e-12	7.17763e-11
DNMT3A	protein_coding	ENSG00000119772	-0.664563	5.28383	7.76676e-23	2.80898e-21
ATL2	protein_coding	ENSG00000119787	0.844168	6.38893	1.18504e-37	1.08121e-35
SLC17A5	protein_coding	ENSG00000119899	-0.737828	2.76351	2.17762e-12	2.99044e-11
IFIT3	protein_coding	ENSG00000119917	1.10865	2.00757	3.90374e-23	1.43337e-21
IFIT2	protein_coding	ENSG00000119922	0.613236	-0.398104	0.00281447	0.00864146
PPP1R3C	protein_coding	ENSG00000119938	-1.28635	4.00383	3.40595e-47	5.06414e-45
AVPI1	protein_coding	ENSG00000119986	-0.588566	3.91036	1.3048e-11	1.63266e-10
HOXB5	protein_coding	ENSG00000120075	1.15252	2.73572	1.01858e-07	7.51694e-07
DUSP1	protein_coding	ENSG00000120129	-1.41063	6.09617	1.75139e-15	3.34277e-14
LRP11	protein_coding	ENSG00000120256	-0.819377	1.84268	2.66479e-08	2.14672e-07
MYCT1	protein_coding	ENSG00000120279	0.919783	4.22686	3.65467e-35	2.92458e-33
CENPL	protein_coding	ENSG00000120334	1.00015	5.51696	4.30636e-47	6.2865e-45
KCNJ5	protein_coding	ENSG00000120457	-0.805946	-0.836272	0.00308067	0.00934915
TP53AIP1	protein_coding	ENSG00000120471	-1.98212	-3.12596	0.00431469	0.012538
PLXDC2	protein_coding	ENSG00000120594	-0.881305	4.36214	2.06442e-30	1.21579e-28
CCDC77	protein_coding	ENSG00000120647	1.00334	4.89384	1.83248e-42	2.15312e-40
SMAD9	protein_coding	ENSG00000120693	-1.09223	1.82198	2.49843e-19	6.94114e-18
KDM3B	protein_coding	ENSG00000120733	0.613493	6.6114	1.12973e-20	3.55709e-19
PLS1	protein_coding	ENSG00000120756	-0.586888	4.1924	1.617e-13	2.52422e-12
UTP20	protein_coding	ENSG00000120800	0.595301	6.47072	1.32743e-17	3.12244e-16
MTERF2	protein_coding	ENSG00000120832	0.634324	2.50442	2.2004e-09	2.06712e-08
APAF1	protein_coding	ENSG00000120868	0.903271	4.65515	5.30584e-33	3.64107e-31
RNF170	protein_coding	ENSG00000120925	-0.613924	3.03133	4.40959e-11	5.15851e-10
NPPB	protein_coding	ENSG00000120937	-1.74618	1.44113	5.75057e-29	3.08495e-27
RDH10	protein_coding	ENSG00000121039	-1.67428	5.13605	2.21863e-118	2.4291e-115
COIL	protein_coding	ENSG00000121058	0.965102	5.30789	3.30952e-43	4.00585e-41
FAM117A	protein_coding	ENSG00000121104	0.904191	2.89633	5.04049e-19	1.3611e-17
TENT4B	protein_coding	ENSG00000121274	0.59579	5.515	2.52927e-18	6.37265e-17
TAS2R10	protein_coding	ENSG00000121318	2.25539	-2.69703	7.34764e-07	4.67096e-06
KCNJ8	protein_coding	ENSG00000121361	-1.66367	2.21735	1.41268e-41	1.54669e-39
ZNF549	protein_coding	ENSG00000121406	0.600827	3.23773	4.60362e-12	6.11624e-11
PDZRN3	protein_coding	ENSG00000121440	-0.785214	2.71916	2.64166e-14	4.44457e-13
KIF18A	protein_coding	ENSG00000121621	1.40907	6.11228	1.49289e-84	6.78478e-82
DEPDC7	protein_coding	ENSG00000121690	0.716164	3.54298	8.21832e-17	1.79307e-15
PILRB	protein_coding	ENSG00000121716	1.27151	2.11461	4.11061e-25	1.72495e-23
CCRL2	protein_coding	ENSG00000121797	-0.909067	0.646093	1.20356e-08	1.02186e-07
ZSCAN20	protein_coding	ENSG00000121903	0.871243	3.07437	1.02635e-19	2.95008e-18
GPSM2	protein_coding	ENSG00000121957	1.89351	6.47155	5.83653e-163	2.81169e-159
ZRANB3	protein_coding	ENSG00000121988	0.702039	2.89859	8.40891e-13	1.20707e-11
MTERF4	protein_coding	ENSG00000122085	0.601139	5.16681	3.12753e-17	7.1203e-16
LDB3	protein_coding	ENSG00000122367	-1.29013	-0.9611	7.63926e-07	4.83974e-06
SHLD2	protein_coding	ENSG00000122376	0.661609	5.23099	3.69311e-19	1.00972e-17
WIPF3	protein_coding	ENSG00000122574	-1.81559	0.71362	3.74001e-25	1.57768e-23
HOXA7	protein_coding	ENSG00000122592	-0.943443	2.84383	2.89057e-15	5.36817e-14
FKBP9	protein_coding	ENSG00000122642	-0.748478	7.3646	4.10083e-32	2.66244e-30
EGR2	protein_coding	ENSG00000122877	-1.10787	1.32251	2.48844e-10	2.64749e-09
CIT	protein_coding	ENSG00000122966	1.02508	6.87799	1.95336e-49	3.1367e-47
MED13L	protein_coding	ENSG00000123066	0.763411	6.96676	1.25646e-26	5.80888e-25
BHLHE41	protein_coding	ENSG00000123095	-1.05369	3.03686	4.01489e-21	1.30685e-19
NECAB1	protein_coding	ENSG00000123119	-1.14527	-0.356405	2.6542e-08	2.1389e-07
ZC3H13	protein_coding	ENSG00000123200	0.796705	7.02636	2.37252e-30	1.39383e-28
NR4A1	protein_coding	ENSG00000123358	-2.67971	5.84591	1.68457e-42	1.98904e-40
PDE1B	protein_coding	ENSG00000123360	-0.721801	-0.409555	0.00270194	0.00833951
STIL	protein_coding	ENSG00000123473	1.04428	6.44349	2.26155e-54	4.35792e-52
HJURP	protein_coding	ENSG00000123485	1.63314	7.21491	1.92057e-135	4.20553e-132
IL13RA2	protein_coding	ENSG00000123496	0.855863	-0.296916	3.93263e-05	0.000183903
RAB9B	protein_coding	ENSG00000123570	-0.682045	1.25106	2.38536e-06	1.38883e-05
TNFAIP6	protein_coding	ENSG00000123610	0.686977	0.772291	9.28513e-06	4.87895e-05
ACVR1C	protein_coding	ENSG00000123612	-0.818977	0.563245	3.87722e-07	2.59634e-06
BAZ2B	protein_coding	ENSG00000123636	0.628284	5.39555	4.96859e-16	1.01422e-14
C4BPB	protein_coding	ENSG00000123843	-0.692176	-0.888914	0.00949043	0.0248961
ZNF137P	transcribed_unprocessed_pseudogene	ENSG00000123870	0.695427	0.223921	0.000223825	0.000897349
RAB38	protein_coding	ENSG00000123892	-0.975585	2.12352	1.70788e-14	2.91964e-13
CKS2	protein_coding	ENSG00000123975	0.990175	6.71995	1.34604e-44	1.81128e-42
HMGB1P1	processed_pseudogene	ENSG00000124097	-1.30169	-2.05077	0.00385241	0.0113689
FAM210B	protein_coding	ENSG00000124098	-0.613202	5.43681	4.36751e-20	1.315e-18
SLPI	protein_coding	ENSG00000124107	-0.692831	-1.30259	0.013245	0.0330878
ARHGAP40	protein_coding	ENSG00000124143	-1.49346	-0.309305	9.48977e-12	1.21453e-10
SDC4	protein_coding	ENSG00000124145	-1.28831	8.59503	3.49654e-78	1.40369e-75
PARD6B	protein_coding	ENSG00000124171	-0.63679	2.56848	1.35951e-08	1.14739e-07
ZNFX1	protein_coding	ENSG00000124201	0.69738	7.06071	5.5564e-24	2.16215e-22
PTGIS	protein_coding	ENSG00000124212	-1.45861	2.7419	6.02389e-45	8.1976e-43
NDP	protein_coding	ENSG00000124479	-1.17809	-2.85405	0.0113806	0.0290847
F13A1	protein_coding	ENSG00000124491	0.856305	0.591697	4.11133e-07	2.73638e-06
TRERF1	protein_coding	ENSG00000124496	0.600392	4.18801	1.20831e-14	2.1075e-13
BTN2A2	protein_coding	ENSG00000124508	-0.888748	3.73462	2.42426e-25	1.03534e-23
RPS10	protein_coding	ENSG00000124614	0.590558	0.30718	0.000760157	0.00269342
NRN1	protein_coding	ENSG00000124785	-0.602094	1.95183	6.19217e-07	3.99654e-06
EREG	protein_coding	ENSG00000124882	-1.50087	3.61589	6.92969e-13	1.00551e-11
DKFZP434K028	lincRNA	ENSG00000124915	-1.38948	-3.24371	0.0201022	0.0472946
WNT1	protein_coding	ENSG00000125084	-3.36045	-2.13714	2.61076e-13	3.99018e-12
SH3TC1	protein_coding	ENSG00000125089	-1.04899	4.35971	3.26677e-42	3.78302e-40
CNOT1	protein_coding	ENSG00000125107	0.674716	8.04994	2.9239e-22	1.02366e-20
TMTC4	protein_coding	ENSG00000125247	-0.602278	3.43907	2.26422e-11	2.74441e-10
EFNB2	protein_coding	ENSG00000125266	0.867931	-1.74498	0.00426887	0.0124184
IRF1	protein_coding	ENSG00000125347	-0.789805	4.35515	8.70782e-23	3.1399e-21
BMP4	protein_coding	ENSG00000125378	0.936884	5.54683	7.64739e-16	1.52359e-14
PTGER2	protein_coding	ENSG00000125384	-1.00271	0.779481	1.45422e-09	1.3972e-08
FAM193A	protein_coding	ENSG00000125386	0.628563	4.88269	2.25551e-18	5.70678e-17
GRK4	protein_coding	ENSG00000125388	-0.682233	2.12516	6.59416e-09	5.79896e-08
IL1B	protein_coding	ENSG00000125538	-2.38856	-1.47389	8.53107e-09	7.38103e-08
PAX8	protein_coding	ENSG00000125618	-0.818622	1.10337	3.93163e-08	3.08674e-07
PSD4	protein_coding	ENSG00000125637	-1.06982	3.55257	5.20386e-35	4.1232e-33
THOC2	protein_coding	ENSG00000125676	0.607319	5.94665	1.23091e-18	3.19493e-17
TNFSF14	protein_coding	ENSG00000125735	-1.07541	-0.57905	1.00388e-06	6.25463e-06
FOSB	protein_coding	ENSG00000125740	-0.898646	4.12598	5.50395e-05	0.000250991
CD93	protein_coding	ENSG00000125810	0.935651	-2.81715	0.0185886	0.044254
PAX1	protein_coding	ENSG00000125813	-1.24527	0.0341078	1.91051e-08	1.57922e-07
NKX2-2	protein_coding	ENSG00000125820	-0.69683	2.49	7.0994e-11	8.08526e-10
FLRT3	protein_coding	ENSG00000125848	-0.999875	2.86648	6.17185e-20	1.82436e-18
OVOL2	protein_coding	ENSG00000125850	-1.59981	-0.23258	1.02627e-14	1.80174e-13
BFSP1	protein_coding	ENSG00000125864	-0.684211	1.10771	7.03907e-06	3.7787e-05
TMEM74B	protein_coding	ENSG00000125895	-1.02361	1.59848	3.75228e-12	5.0464e-11
FAM110A	protein_coding	ENSG00000125898	1.08804	3.27892	9.39209e-33	6.3369e-31
S1PR4	protein_coding	ENSG00000125910	-0.682984	-0.98242	0.019861	0.0468049
ID1	protein_coding	ENSG00000125968	-0.614039	6.47461	5.47114e-18	1.3379e-16
GRPR	protein_coding	ENSG00000126010	0.856951	-1.9446	0.00656835	0.0181228
CCR7	protein_coding	ENSG00000126353	-2.18165	-1.6772	1.02214e-09	1.00409e-08
FRMD8	protein_coding	ENSG00000126391	-0.588594	5.83152	1.1443e-18	2.97655e-17
FLRT1	protein_coding	ENSG00000126500	-1.33532	-0.449763	1.49084e-07	1.07194e-06
WNK4	protein_coding	ENSG00000126562	0.659878	3.58944	2.68254e-11	3.22587e-10
NSRP1	protein_coding	ENSG00000126653	0.58808	5.97682	3.03646e-15	5.61746e-14
RHOJ	protein_coding	ENSG00000126785	0.816671	0.491348	4.40906e-07	2.91921e-06
DLGAP5	protein_coding	ENSG00000126787	1.38011	7.99642	1.03853e-86	5.00301e-84
EVI2A	protein_coding	ENSG00000126860	1.09816	-0.193474	8.85443e-08	6.59483e-07
HIVEP3	protein_coding	ENSG00000127124	-0.620387	4.64312	1.51178e-15	2.90154e-14
EDN2	protein_coding	ENSG00000127129	-1.96722	2.37297	3.10436e-63	8.30831e-61
PTPRB	protein_coding	ENSG00000127329	-0.776386	2.59512	2.39711e-13	3.67766e-12
FBXL16	protein_coding	ENSG00000127585	-0.598651	4.10531	3.16283e-14	5.27583e-13
METTL25	protein_coding	ENSG00000127720	0.782798	0.470106	1.11905e-05	5.79541e-05
METTL16	protein_coding	ENSG00000127804	0.700861	5.29247	7.13044e-24	2.74802e-22
AKAP9	protein_coding	ENSG00000127914	0.658712	6.04751	2.15694e-17	5.00783e-16
STEAP4	protein_coding	ENSG00000127954	-1.77618	-2.52435	1.39266e-05	7.09947e-05
SRD5A3	protein_coding	ENSG00000128039	-0.702834	3.40084	6.4653e-16	1.29667e-14
ADM2	protein_coding	ENSG00000128165	-0.648088	4.53312	3.18038e-17	7.2338e-16
C22orf24	processed_transcript	ENSG00000128254	-1.25526	-1.68077	7.37108e-05	0.000327578
GNAZ	protein_coding	ENSG00000128266	-1.19352	3.81852	1.11535e-40	1.17831e-38
MGAT3	protein_coding	ENSG00000128268	-0.812279	2.59564	4.84988e-13	7.15365e-12
LIF	protein_coding	ENSG00000128342	-0.868162	7.73796	2.09539e-37	1.89032e-35
LRRC4	protein_coding	ENSG00000128594	-1.76955	-0.809291	1.32458e-08	1.12066e-07
SMO	protein_coding	ENSG00000128602	-0.590789	4.75738	1.87248e-14	3.19649e-13
IRF5	protein_coding	ENSG00000128604	-0.769115	-1.21227	0.00945525	0.02482
KLHDC10	protein_coding	ENSG00000128607	0.656592	4.33464	1.13312e-17	2.69165e-16
HOXD1	protein_coding	ENSG00000128645	-1.52007	-1.29615	5.59513e-06	3.05116e-05
HOXD9	protein_coding	ENSG00000128709	-1.0267	1.4775	7.85267e-12	1.01749e-10
CGNL1	protein_coding	ENSG00000128849	-0.587631	4.07688	2.19814e-11	2.66868e-10
KNSTRN	protein_coding	ENSG00000128944	1.29538	6.47093	1.43548e-83	6.2866e-81
CHAC1	protein_coding	ENSG00000128965	-0.820563	3.42513	8.40914e-18	2.02551e-16
MYOD1	protein_coding	ENSG00000129152	-6.18311	-3.90839	0.000354602	0.00135701
KCNC1	protein_coding	ENSG00000129159	-1.18154	2.45846	2.05914e-25	8.92058e-24
CSRP3	protein_coding	ENSG00000129170	-1.60295	-0.0414185	1.69472e-12	2.35142e-11
PIMREG	protein_coding	ENSG00000129195	0.78995	5.6373	5.41615e-32	3.46965e-30
KRI1	protein_coding	ENSG00000129347	0.60992	5.88157	7.81843e-21	2.48447e-19
KLK10	protein_coding	ENSG00000129451	-0.643476	-0.596896	0.00482108	0.0138228
FOXA1	protein_coding	ENSG00000129514	-1.5429	0.714964	2.84685e-20	8.68002e-19
EGLN3	protein_coding	ENSG00000129521	-0.813257	1.68965	2.44447e-11	2.95582e-10
MIS18BP1	protein_coding	ENSG00000129534	1.07769	7.04612	9.8577e-56	1.97869e-53
RNASE1	protein_coding	ENSG00000129538	0.58684	0.217974	0.000744296	0.0026415
EPB41L4A	protein_coding	ENSG00000129595	-0.688344	2.39003	1.35432e-10	1.49229e-09
QRICH2	protein_coding	ENSG00000129646	0.822478	3.11628	1.05437e-16	2.27365e-15
ARHGEF6	protein_coding	ENSG00000129675	-0.676718	1.99597	1.82727e-09	1.73145e-08
CHRNA10	protein_coding	ENSG00000129749	0.923974	0.799196	9.91978e-10	9.77251e-09
SGO1	protein_coding	ENSG00000129810	0.951249	5.01582	3.10175e-37	2.76711e-35
TNNI3	protein_coding	ENSG00000129991	1.39576	-1.95752	4.62631e-06	2.56288e-05
GALNT8	protein_coding	ENSG00000130035	-0.830858	1.97646	2.97808e-11	3.56526e-10
KCNA5	protein_coding	ENSG00000130037	-1.51818	-2.11686	0.000623576	0.00225155
STARD8	protein_coding	ENSG00000130052	1.87989	3.75038	1.8315e-105	1.57554e-102
GDPD2	protein_coding	ENSG00000130055	0.986295	-0.111217	1.05895e-06	6.58414e-06
LDLR	protein_coding	ENSG00000130164	0.710181	7.14402	2.45809e-28	1.25974e-26
CNN1	protein_coding	ENSG00000130176	-0.772433	6.19836	6.73442e-32	4.28e-30
THEM6	protein_coding	ENSG00000130193	-0.638284	2.92686	5.93059e-10	5.99203e-09
ATP8B3	protein_coding	ENSG00000130270	0.612153	3.99714	7.83779e-13	1.12845e-11
TULP4	protein_coding	ENSG00000130338	0.730277	5.84728	3.85789e-27	1.8401e-25
STK33	protein_coding	ENSG00000130413	0.642206	3.35166	3.44925e-13	5.20891e-12
CACNG6	protein_coding	ENSG00000130433	-0.902314	1.52808	1.48955e-12	2.08235e-11
KLHDC7B	protein_coding	ENSG00000130487	-1.66073	-3.33745	0.00952444	0.0249581
JUND	protein_coding	ENSG00000130522	-0.779386	5.43928	9.9889e-28	4.90026e-26
ZBTB46	protein_coding	ENSG00000130584	-0.810843	2.15518	5.07964e-13	7.45729e-12
SAMD10	protein_coding	ENSG00000130590	-0.685401	2.62246	3.1284e-11	3.73778e-10
PNPLA7	protein_coding	ENSG00000130653	0.842001	0.329348	0.000146793	0.000610673
TMEM160	protein_coding	ENSG00000130748	-0.72441	3.55207	9.32106e-12	1.19487e-10
NPAS1	protein_coding	ENSG00000130751	-0.805353	0.887353	2.62475e-08	2.118e-07
AKAP12	protein_coding	ENSG00000131016	-0.691204	8.91085	1.35884e-19	3.86426e-18
SYNE1	protein_coding	ENSG00000131018	0.596134	7.62003	7.98454e-17	1.74522e-15
ZNF341	protein_coding	ENSG00000131061	0.974853	1.93703	1.13025e-15	2.19551e-14
EDA2R	protein_coding	ENSG00000131080	0.749991	5.58663	1.49632e-28	7.78443e-27
GFAP	protein_coding	ENSG00000131095	-1.33568	-2.99019	0.00831392	0.0221695
ZNF227	protein_coding	ENSG00000131115	0.760685	4.5247	1.60597e-24	6.54534e-23
NFATC1	protein_coding	ENSG00000131196	-0.594243	5.01025	3.79151e-16	7.83915e-15
IDO1	protein_coding	ENSG00000131203	3.65105	-3.54334	2.18381e-11	2.65358e-10
RAB11FIP4	protein_coding	ENSG00000131242	-0.627743	3.23359	2.08724e-11	2.54558e-10
RBSN	protein_coding	ENSG00000131381	0.691279	5.26159	2.60968e-22	9.18996e-21
KCNC3	protein_coding	ENSG00000131398	0.621655	5.6603	3.62119e-17	8.18233e-16
PDLIM4	protein_coding	ENSG00000131435	-0.595309	7.24682	3.53542e-18	8.77913e-17
ANKHD1	protein_coding	ENSG00000131503	0.677651	0.352992	8.63464e-05	0.000378632
NINJ1	protein_coding	ENSG00000131669	-0.629694	5.3702	7.36093e-20	2.14652e-18
KRT34	protein_coding	ENSG00000131737	-0.830637	5.40188	2.31174e-22	8.17663e-21
KRT33B	protein_coding	ENSG00000131738	-0.799326	1.42324	1.46551e-08	1.22824e-07
TNS4	protein_coding	ENSG00000131746	-0.642402	3.19939	1.1432e-12	1.62072e-11
TOP2A	protein_coding	ENSG00000131747	0.915271	9.14671	2.01282e-40	2.08977e-38
KRT17P1	transcribed_unprocessed_pseudogene	ENSG00000131885	-2.19801	0.0335429	1.15705e-17	2.7404e-16
GCH1	protein_coding	ENSG00000131979	-1.07362	3.56572	5.22025e-30	2.97258e-28
DNAJB1	protein_coding	ENSG00000132002	0.647519	7.31153	6.56315e-24	2.53344e-22
ZSWIM4	protein_coding	ENSG00000132003	-1.0816	2.82191	2.1549e-25	9.31867e-24
SLC6A11	protein_coding	ENSG00000132164	-0.677365	2.05156	1.6922e-08	1.40697e-07
PPARG	protein_coding	ENSG00000132170	-1.18396	4.158	3.54875e-43	4.27394e-41
PTPRE	protein_coding	ENSG00000132334	-0.805753	4.52587	4.42104e-28	2.22782e-26
PNISR	protein_coding	ENSG00000132424	0.846192	7.35906	2.54492e-35	2.05015e-33
TRIM47	protein_coding	ENSG00000132481	-0.974797	5.16567	1.54435e-38	1.47614e-36
ANKEF1	protein_coding	ENSG00000132623	-0.628977	2.57612	3.06345e-09	2.81961e-08
SNAP25	protein_coding	ENSG00000132639	-0.660148	3.57727	3.77221e-15	6.89386e-14
KHDC4	protein_coding	ENSG00000132680	0.749002	6.30194	1.14272e-28	5.97063e-27
TESMIN	protein_coding	ENSG00000132749	0.999785	-0.282991	2.21033e-06	1.29886e-05
ZSWIM3	protein_coding	ENSG00000132801	-0.598083	1.83404	7.71945e-06	4.11005e-05
PPP1R3D	protein_coding	ENSG00000132825	-0.753884	1.82734	1.59674e-09	1.52682e-08
DMGDH	protein_coding	ENSG00000132837	-2.06227	-3.40739	0.0145673	0.0359326
KANK4	protein_coding	ENSG00000132854	-1.49347	-1.9185	0.000100926	0.000435663
SYT4	protein_coding	ENSG00000132872	-1.43941	-1.23858	0.000366465	0.00139801
ATP8A2	protein_coding	ENSG00000132932	0.924469	4.18684	3.5664e-29	1.93477e-27
CDK8	protein_coding	ENSG00000132964	0.587727	4.87101	4.53541e-16	9.29739e-15
CHRM3	protein_coding	ENSG00000133019	-0.964573	0.826899	1.3938e-10	1.5302e-09
POSTN	protein_coding	ENSG00000133110	2.53504	-0.93294	3.04283e-24	1.21145e-22
KL	protein_coding	ENSG00000133116	-2.72421	-3.49491	4.25269e-05	0.000197598
SRRM1	protein_coding	ENSG00000133226	0.629046	7.41337	1.18184e-20	3.71147e-19
PDZD2	protein_coding	ENSG00000133401	0.814216	4.19982	2.40876e-24	9.65389e-23
LARGE1	protein_coding	ENSG00000133424	-0.603927	5.54305	6.61567e-20	1.94569e-18
ADCK2	protein_coding	ENSG00000133597	-1.17477	3.03429	5.13184e-34	3.74577e-32
TMTC1	protein_coding	ENSG00000133687	-0.823107	3.64795	3.05577e-23	1.1289e-21
SBF2	protein_coding	ENSG00000133812	0.712419	5.23644	9.17893e-23	3.29989e-21
GSC	protein_coding	ENSG00000133937	-0.757863	-0.806703	0.00730209	0.0198382
TTC9	protein_coding	ENSG00000133985	-0.755902	3.1139	5.48248e-14	8.94418e-13
MRO	protein_coding	ENSG00000134042	-0.594221	-0.585625	0.011169	0.0286139
CCNB1	protein_coding	ENSG00000134057	0.91559	8.50257	6.39156e-44	8.32181e-42
IRAK2	protein_coding	ENSG00000134070	-0.633904	1.72539	2.99192e-06	1.70895e-05
MEIS2	protein_coding	ENSG00000134138	-0.745143	3.02282	2.9535e-14	4.93349e-13
GNAT2	protein_coding	ENSG00000134183	-0.820197	-1.76962	0.0136358	0.0339407
PRPF38B	protein_coding	ENSG00000134186	0.885032	7.27708	3.00702e-39	3.0054e-37
PSRC1	protein_coding	ENSG00000134222	1.68842	6.15345	9.95632e-139	2.39818e-135
WNT2B	protein_coding	ENSG00000134245	-0.601236	2.28147	4.70621e-08	3.63795e-07
NOTCH2	protein_coding	ENSG00000134250	0.686485	8.64586	5.82535e-24	2.2595e-22
NGF	protein_coding	ENSG00000134259	-0.990361	1.49168	6.10503e-15	1.09495e-13
FKBP11	protein_coding	ENSG00000134285	0.657341	3.79982	0.000547058	0.00199772
CMPK2	protein_coding	ENSG00000134326	-1.07057	-0.376813	5.56348e-06	3.03597e-05
SAA2	protein_coding	ENSG00000134339	-1.45728	-1.0389	2.65322e-06	1.5311e-05
FST	protein_coding	ENSG00000134363	-1.36619	5.59268	4.38431e-64	1.20006e-61
CRB1	protein_coding	ENSG00000134376	2.00989	-3.83876	0.0160554	0.0390278
IL15RA	protein_coding	ENSG00000134470	-0.762245	0.692616	2.67419e-06	1.54136e-05
DOCK2	protein_coding	ENSG00000134516	0.849882	4.28487	1.71368e-29	9.5109e-28
KLRD1	protein_coding	ENSG00000134539	-0.824302	-1.36056	0.0114362	0.0292054
SPX	protein_coding	ENSG00000134548	-0.892136	3.20001	1.86563e-20	5.77602e-19
SPOCD1	protein_coding	ENSG00000134668	-0.858632	3.82717	4.77714e-21	1.54452e-19
CDCA8	protein_coding	ENSG00000134690	1.53916	6.61754	8.4064e-123	1.12492e-119
HOOK1	protein_coding	ENSG00000134709	3.21636	-3.42917	1.39674e-05	7.11876e-05
DSC2	protein_coding	ENSG00000134755	-0.590462	2.88504	1.7635e-09	1.67234e-08
APLNR	protein_coding	ENSG00000134817	-1.05272	-1.55122	0.000514756	0.00189586
PDGFRA	protein_coding	ENSG00000134853	-0.745853	3.89262	2.20076e-14	3.73045e-13
SLC37A2	protein_coding	ENSG00000134955	-0.681379	1.00335	2.93252e-06	1.679e-05
PSAT1	protein_coding	ENSG00000135069	-0.961701	5.70103	9.81017e-44	1.25025e-41
MSI1	protein_coding	ENSG00000135097	-1.21374	3.79823	4.23407e-42	4.87843e-40
TBX3	protein_coding	ENSG00000135111	0.757908	6.18607	2.74011e-29	1.49323e-27
TMEM243	protein_coding	ENSG00000135185	-0.937643	3.92587	1.49182e-31	9.23739e-30
SRPK2	protein_coding	ENSG00000135250	0.599683	6.10259	3.82357e-18	9.46539e-17
ANKRD6	protein_coding	ENSG00000135299	-0.719515	2.19597	6.4523e-11	7.40784e-10
MRAP2	protein_coding	ENSG00000135324	-0.906043	-0.306847	0.000137423	0.000575373
AKIRIN2	protein_coding	ENSG00000135334	0.615945	4.68656	6.43101e-18	1.56468e-16
AVIL	protein_coding	ENSG00000135407	-0.718533	0.273394	0.000201165	0.000813818
PPP1R1A	protein_coding	ENSG00000135447	-0.608276	0.125866	0.00354491	0.0105832
TROAP	protein_coding	ENSG00000135451	1.60285	6.67569	1.79118e-119	2.05448e-116
ESPL1	protein_coding	ENSG00000135476	0.990649	6.62925	8.51017e-51	1.43346e-48
SLC26A10	protein_coding	ENSG00000135502	0.632227	1.77088	2.33165e-05	0.000113989
MIP	protein_coding	ENSG00000135517	-1.68344	-3.06569	0.00115479	0.00391658
STX11	protein_coding	ENSG00000135604	-1.80372	1.9925	1.04691e-34	8.05655e-33
EGR4	protein_coding	ENSG00000135625	-2.27443	-0.148696	9.43034e-16	1.84974e-14
EMX1	protein_coding	ENSG00000135638	-1.64184	-0.276542	8.24794e-12	1.06639e-10
KCNMB4	protein_coding	ENSG00000135643	-0.637331	2.81649	1.10131e-10	1.22812e-09
MDM2	protein_coding	ENSG00000135679	0.93093	7.06756	1.99068e-48	3.11361e-46
KIAA0513	protein_coding	ENSG00000135709	-0.798154	3.23489	2.33712e-18	5.90087e-17
ZNF670-ZNF695	protein_coding	ENSG00000135747	1.03744	-1.63036	0.000291793	0.00113825
ABCB10	protein_coding	ENSG00000135776	-0.662985	4.77074	2.13683e-20	6.59024e-19
KIAA1614	protein_coding	ENSG00000135835	-0.750099	1.15581	1.60354e-06	9.6585e-06
CEP350	protein_coding	ENSG00000135837	0.877641	6.08525	1.80798e-27	8.70975e-26
SP110	protein_coding	ENSG00000135899	0.593461	4.64323	1.38391e-16	2.96041e-15
DOCK10	protein_coding	ENSG00000135905	-0.847676	4.62146	1.89239e-29	1.04786e-27
WNT10A	protein_coding	ENSG00000135925	-1.32258	1.78163	9.62916e-24	3.6874e-22
EPC2	protein_coding	ENSG00000135999	0.633697	5.41628	2.42652e-19	6.75696e-18
SLC41A2	protein_coding	ENSG00000136052	-0.934034	4.09747	7.98036e-32	5.0058e-30
CKAP2	protein_coding	ENSG00000136108	1.54947	7.14419	1.17761e-103	9.45503e-101
BORA	protein_coding	ENSG00000136122	1.46173	4.71397	2.40319e-81	1.03367e-78
PHF11	protein_coding	ENSG00000136147	0.634364	2.04303	5.04267e-08	3.88184e-07
LMO7	protein_coding	ENSG00000136153	0.775239	6.34761	1.8081e-31	1.11385e-29
TNS3	protein_coding	ENSG00000136205	-0.603263	6.1857	1.21502e-17	2.86924e-16
IGF2BP3	protein_coding	ENSG00000136231	1.05454	2.12875	2.4897e-19	6.92489e-18
RAPGEF5	protein_coding	ENSG00000136237	-1.96323	0.696826	2.13381e-23	7.96854e-22
IL6	protein_coding	ENSG00000136244	-2.64488	1.63004	1.91777e-45	2.65479e-43
NACAD	protein_coding	ENSG00000136274	-0.74341	-0.873292	0.00261211	0.00809131
MYO1G	protein_coding	ENSG00000136286	-0.631203	-0.997877	0.0111549	0.0285835
MMD2	protein_coding	ENSG00000136297	-2.06595	-2.7948	0.000117141	0.000497456
NKX2-8	protein_coding	ENSG00000136327	-1.83745	-2.24535	0.000106978	0.000459156
ZFHX2	protein_coding	ENSG00000136367	-0.827691	3.37779	5.48299e-17	1.21947e-15
ABHD17C	protein_coding	ENSG00000136379	-0.68588	3.84651	4.85001e-16	9.90858e-15
ALPK3	protein_coding	ENSG00000136383	-1.67691	1.13093	7.27406e-32	4.5987e-30
TM6SF1	protein_coding	ENSG00000136404	-0.775948	-0.106299	0.000113736	0.000484706
SRSF1	protein_coding	ENSG00000136450	0.754033	6.11955	1.58451e-23	5.98215e-22
TBR1	protein_coding	ENSG00000136535	1.35381	-1.03736	2.38493e-08	1.93943e-07
2019-03-07	protein_coding	ENSG00000136536	0.736752	6.79128	6.05027e-28	3.01724e-26
RPS6KC1	protein_coding	ENSG00000136643	0.643577	5.56102	3.55059e-20	1.07441e-18
IL1RN	protein_coding	ENSG00000136689	-1.1229	0.284627	5.093e-09	4.54016e-08
GAD2	protein_coding	ENSG00000136750	-1.88063	-2.51998	0.000135568	0.000568
ZFP37	protein_coding	ENSG00000136866	0.606366	0.968813	0.000107974	0.000462852
NR5A1	protein_coding	ENSG00000136931	-2.84924	-3.56939	0.00151867	0.00500756
LMX1B	protein_coding	ENSG00000136944	0.941611	1.75738	1.35183e-12	1.89973e-11
MYC	protein_coding	ENSG00000136997	-0.606524	7.77156	4.715e-18	1.15888e-16
SIT1	protein_coding	ENSG00000137078	-1.77502	-3.29012	0.00152027	0.00501146
DNAJB5	protein_coding	ENSG00000137094	-0.601598	6.75969	4.01526e-19	1.09283e-17
SPAG8	protein_coding	ENSG00000137098	0.659076	-0.671763	0.00435043	0.0126251
ARHGEF39	protein_coding	ENSG00000137135	0.799289	4.9589	1.06469e-28	5.5872e-27
ZSCAN9	protein_coding	ENSG00000137185	1.05367	4.10353	1.7875e-40	1.87198e-38
TFAP2A	protein_coding	ENSG00000137203	-0.689121	-0.922289	0.0106415	0.0274494
SLC22A23	protein_coding	ENSG00000137266	-0.639786	2.14812	1.4656e-06	8.88548e-06
LRRC1	protein_coding	ENSG00000137269	-0.610334	4.30643	4.33933e-15	7.88246e-14
TCF19	protein_coding	ENSG00000137310	-0.715548	6.04602	8.26698e-29	4.38605e-27
IER3	protein_coding	ENSG00000137331	-1.17133	7.48645	3.08041e-32	2.01078e-30
RNF144B	protein_coding	ENSG00000137393	-0.669398	0.83447	7.51936e-05	0.000333614
FAM8A1	protein_coding	ENSG00000137414	-0.629698	3.97265	8.56304e-16	1.69064e-14
ARRB1	protein_coding	ENSG00000137486	-0.681779	3.86636	2.53491e-16	5.31405e-15
PI15	protein_coding	ENSG00000137558	-0.802877	0.455796	1.68739e-05	8.47638e-05
TTPA	protein_coding	ENSG00000137561	-1.2522	1.43924	1.544e-16	3.29119e-15
SLCO5A1	protein_coding	ENSG00000137571	-0.747395	1.03825	3.63578e-06	2.04998e-05
TRPC6	protein_coding	ENSG00000137672	-1.27139	-0.489692	4.68901e-09	4.20023e-08
CFAP300	protein_coding	ENSG00000137691	-0.613247	1.39891	1.05965e-05	5.51861e-05
BTG4	protein_coding	ENSG00000137707	-1.19153	0.00471816	2.38495e-09	2.23439e-08
ARHGAP20	protein_coding	ENSG00000137727	-1.32381	1.73312	3.6829e-25	1.55632e-23
MAPKBP1	protein_coding	ENSG00000137802	0.625249	4.4909	1.92814e-17	4.4916e-16
KIF23	protein_coding	ENSG00000137807	1.10082	8.35882	9.07552e-59	2.02409e-56
ITGA11	protein_coding	ENSG00000137809	-0.722431	1.74077	1.6235e-09	1.54872e-08
KNL1	protein_coding	ENSG00000137812	1.11724	6.63804	1.39155e-49	2.24954e-47
PAQR5	protein_coding	ENSG00000137819	-1.0475	4.44808	1.07943e-43	1.36843e-41
SMAD6	protein_coding	ENSG00000137834	-0.84677	3.09475	1.88434e-18	4.79283e-17
SEMA6D	protein_coding	ENSG00000137872	-0.909066	-0.753448	0.00130896	0.00438245
SPTBN5	protein_coding	ENSG00000137877	0.719684	4.91651	3.44897e-06	1.95379e-05
RABGGTB	protein_coding	ENSG00000137955	0.900785	6.76481	3.47084e-37	3.08495e-35
IFI44L	protein_coding	ENSG00000137959	1.10253	1.41025	3.1608e-15	5.843e-14
ARHGAP29	protein_coding	ENSG00000137962	-0.84434	8.18742	1.85361e-35	1.5033e-33
THUMPD2	protein_coding	ENSG00000138050	0.596237	4.48819	6.45871e-14	1.0455e-12
SLC3A1	protein_coding	ENSG00000138079	1.42558	-2.91995	0.00442992	0.012828
KIF11	protein_coding	ENSG00000138160	1.07374	7.33883	1.10906e-57	2.36407e-55
CUZD1	protein_coding	ENSG00000138161	0.77592	2.36302	6.74877e-14	1.08953e-12
DUSP5	protein_coding	ENSG00000138166	-1.25649	5.34939	4.79817e-19	1.29712e-17
CEP55	protein_coding	ENSG00000138180	0.923248	8.09893	7.14431e-39	6.99532e-37
KIF20B	protein_coding	ENSG00000138182	1.49976	6.85026	1.47223e-94	9.332e-92
ZNF365	protein_coding	ENSG00000138311	-0.987754	4.00965	2.72906e-36	2.29042e-34
TET1	protein_coding	ENSG00000138336	0.698961	2.16755	2.12213e-08	1.73981e-07
MYPN	protein_coding	ENSG00000138347	-1.04463	1.32731	2.85787e-14	4.78371e-13
CARF	protein_coding	ENSG00000138380	-0.734373	0.761078	3.38299e-05	0.000160469
NAB1	protein_coding	ENSG00000138386	-1.07216	6.101	2.31193e-43	2.8412e-41
PPIG	protein_coding	ENSG00000138398	0.626891	6.53832	1.07966e-18	2.81447e-17
CHRNA1	protein_coding	ENSG00000138435	1.19345	-1.77122	1.16759e-05	6.02995e-05
SENP7	protein_coding	ENSG00000138468	0.674725	4.18621	5.28704e-17	1.17698e-15
SHF	protein_coding	ENSG00000138606	-0.847423	2.86739	1.3856e-18	3.58101e-17
CILP	protein_coding	ENSG00000138615	1.0526	-1.21413	7.70648e-06	4.10586e-05
SEMA7A	protein_coding	ENSG00000138623	-0.727019	7.83964	6.06283e-30	3.43613e-28
ARHGAP24	protein_coding	ENSG00000138639	1.13959	0.413559	2.80445e-09	2.60011e-08
HERC3	protein_coding	ENSG00000138641	-0.645545	2.90565	5.06079e-11	5.88601e-10
PRKG2	protein_coding	ENSG00000138669	-0.637817	0.365878	0.000739909	0.00262709
FGF2	protein_coding	ENSG00000138685	-1.48988	5.05569	7.31168e-99	5.33686e-96
PDE5A	protein_coding	ENSG00000138735	-0.766093	3.31268	1.70966e-16	3.63145e-15
CXCL9	protein_coding	ENSG00000138755	1.37215	-3.27754	0.0029844	0.00908674
CENPE	protein_coding	ENSG00000138778	1.89254	7.43292	2.27199e-105	1.88708e-102
LEF1	protein_coding	ENSG00000138795	-1.08949	4.88226	8.15081e-51	1.3826e-48
HADH	protein_coding	ENSG00000138796	-0.688182	4.39192	2.24541e-19	6.27439e-18
SHISAL1	protein_coding	ENSG00000138944	-0.888931	1.86879	1.88371e-13	2.92728e-12
ETV6	protein_coding	ENSG00000139083	0.878875	4.98569	5.59329e-37	4.89911e-35
PLCZ1	protein_coding	ENSG00000139151	1.90659	-2.7216	3.41881e-07	2.30993e-06
SCAF11	protein_coding	ENSG00000139218	0.614605	7.17545	6.24356e-21	2.00518e-19
PPFIA2	protein_coding	ENSG00000139220	1.63304	0.512692	1.25621e-23	4.78016e-22
2019-03-09	protein_coding	ENSG00000139266	-0.600954	3.53295	5.47719e-12	7.22898e-11
INHBE	protein_coding	ENSG00000139269	-1.66463	1.85425	4.47757e-32	2.89922e-30
GAS2L3	protein_coding	ENSG00000139354	1.91635	5.76723	8.53837e-127	1.46903e-123
TMEM132B	protein_coding	ENSG00000139364	1.73894	-1.94957	3.2504e-09	2.97351e-08
SLC46A3	protein_coding	ENSG00000139508	0.767484	3.17961	7.43908e-18	1.80086e-16
SUOX	protein_coding	ENSG00000139531	0.671212	3.27287	4.78975e-14	7.83236e-13
RDH16	protein_coding	ENSG00000139547	-1.15819	-2.94632	0.0154825	0.0378193
LPAR6	protein_coding	ENSG00000139679	1.61996	-1.75804	2.19809e-08	1.79716e-07
SLAIN1	protein_coding	ENSG00000139737	-1.20612	0.082694	8.18731e-08	6.12446e-07
RBM26	protein_coding	ENSG00000139746	0.690189	6.47396	8.42958e-26	3.74619e-24
TTC6	protein_coding	ENSG00000139865	-0.614383	-0.524099	0.00597758	0.0166974
PELI2	protein_coding	ENSG00000139946	-0.831533	3.73346	1.13132e-21	3.82726e-20
SYT16	protein_coding	ENSG00000139973	0.697027	3.86529	7.64869e-18	1.84974e-16
JDP2	protein_coding	ENSG00000140044	-0.887936	5.30039	5.40199e-35	4.26615e-33
SLC24A4	protein_coding	ENSG00000140090	-0.710776	0.218509	0.00130225	0.00436507
SLC27A2	protein_coding	ENSG00000140284	-0.76126	1.22435	4.26824e-08	3.32823e-07
PIF1	protein_coding	ENSG00000140451	2.94552	5.66448	1.06096e-281	2.55554e-277
GOLGA6D	protein_coding	ENSG00000140478	-1.44994	-3.21224	0.00276658	0.00851286
TICRR	protein_coding	ENSG00000140534	1.21982	5.94851	1.90613e-62	4.83294e-60
ST8SIA2	protein_coding	ENSG00000140557	-1.13441	0.350883	3.93602e-10	4.07772e-09
ZFHX3	protein_coding	ENSG00000140836	0.598005	5.80275	3.47126e-16	7.21417e-15
SSH2	protein_coding	ENSG00000141298	0.693739	5.13717	1.66806e-23	6.27791e-22
RHBDL3	protein_coding	ENSG00000141314	-1.83659	2.44945	1.99003e-51	3.49882e-49
SS18	protein_coding	ENSG00000141380	0.60613	6.49918	6.17285e-20	1.82436e-18
IMPA2	protein_coding	ENSG00000141401	-0.689434	2.6719	2.71383e-10	2.86828e-09
ASXL3	protein_coding	ENSG00000141431	-1.42269	-0.554493	1.0946e-09	1.07177e-08
ADCYAP1	protein_coding	ENSG00000141433	-1.69097	-3.11851	0.0146975	0.0362167
GAREM1	protein_coding	ENSG00000141441	-0.615362	2.4837	4.18726e-08	3.27144e-07
RAB40B	protein_coding	ENSG00000141542	-1.29287	2.35471	2.29348e-26	1.03646e-24
RPTOR	protein_coding	ENSG00000141564	0.602455	5.88769	4.10394e-19	1.11571e-17
RNF165	protein_coding	ENSG00000141622	-0.836044	2.02729	3.96031e-13	5.93603e-12
MAPK4	protein_coding	ENSG00000141639	-0.839666	-0.611819	0.000443351	0.00165926
CBLN2	protein_coding	ENSG00000141668	-1.16752	-0.183418	6.00859e-08	4.5902e-07
STAC2	protein_coding	ENSG00000141750	-1.44879	-0.805921	1.77219e-08	1.46942e-07
BRD4	protein_coding	ENSG00000141867	0.625797	6.29369	1.64166e-20	5.09571e-19
CCDC97	protein_coding	ENSG00000142039	0.755012	4.67906	1.5158e-21	5.08512e-20
HUNK	protein_coding	ENSG00000142149	-0.679094	4.72188	3.27271e-20	9.9407e-19
SIK1	protein_coding	ENSG00000142178	-0.842312	1.10185	5.46093e-08	4.18776e-07
WTIP	protein_coding	ENSG00000142279	-1.05287	5.50048	2.19559e-43	2.71206e-41
EVI5L	protein_coding	ENSG00000142459	-0.628064	2.93266	6.63628e-09	5.82962e-08
SLC47A1	protein_coding	ENSG00000142494	-0.595708	-0.0850906	0.00327116	0.00984414
GPR32	protein_coding	ENSG00000142511	-2.52585	-4.21644	0.0132262	0.0330443
FAM71E1	protein_coding	ENSG00000142530	-0.658205	-0.450753	0.00433879	0.0125975
CFAP74	protein_coding	ENSG00000142609	-1.21207	-0.302916	8.32319e-10	8.28433e-09
PADI1	protein_coding	ENSG00000142623	-0.87309	0.0337324	1.26914e-06	7.79045e-06
ARHGEF19	protein_coding	ENSG00000142632	0.655569	4.15738	7.66932e-16	1.5267e-14
PLK4	protein_coding	ENSG00000142731	0.663204	5.96002	1.59667e-20	4.96246e-19
CYR61	protein_coding	ENSG00000142871	-0.628114	9.4234	8.54819e-19	2.26513e-17
KIF2C	protein_coding	ENSG00000142945	1.1462	7.51095	2.80878e-69	8.78639e-67
GPR161	protein_coding	ENSG00000143147	-0.607473	4.47952	8.84753e-16	1.74252e-14
ATP1B1	protein_coding	ENSG00000143153	-0.932527	6.65451	4.7113e-47	6.8362e-45
MAEL	protein_coding	ENSG00000143194	-2.0638	-3.92998	0.0163791	0.0396904
ILDR2	protein_coding	ENSG00000143195	-0.796311	6.52489	3.23012e-31	1.95487e-29
NUF2	protein_coding	ENSG00000143228	0.644282	6.59914	1.33e-19	3.78673e-18
RORC	protein_coding	ENSG00000143365	-1.36815	-2.68798	0.00684867	0.0187865
TUFT1	protein_coding	ENSG00000143367	0.587855	6.17174	2.66372e-19	7.36636e-18
CTSK	protein_coding	ENSG00000143387	0.827095	0.807801	4.23538e-08	3.30475e-07
HORMAD1	protein_coding	ENSG00000143452	0.684014	2.18406	8.31886e-09	7.21297e-08
GOLPH3L	protein_coding	ENSG00000143457	0.71555	4.44181	1.48531e-22	5.26128e-21
KCNH1	protein_coding	ENSG00000143473	1.07502	-1.20983	2.3734e-06	1.3833e-05
TAF1A	protein_coding	ENSG00000143498	0.59905	3.91245	1.07361e-12	1.52566e-11
DUSP10	protein_coding	ENSG00000143507	-0.649153	4.10228	4.0762e-13	6.09078e-12
SLC27A3	protein_coding	ENSG00000143554	0.727135	3.09072	0.000351903	0.00134822
FLG	protein_coding	ENSG00000143631	-0.985573	0.886935	2.76521e-09	2.5657e-08
WNT9A	protein_coding	ENSG00000143816	-1.02021	1.90069	1.42844e-17	3.35023e-16
SOX13	protein_coding	ENSG00000143842	-0.687569	4.52678	1.3658e-19	3.8795e-18
GDF7	protein_coding	ENSG00000143869	-1.46474	2.18396	4.28967e-34	3.14058e-32
RHOB	protein_coding	ENSG00000143878	-1.15086	6.12754	1.7395e-65	4.87201e-63
ASXL2	protein_coding	ENSG00000143970	0.650925	7.05002	9.1887e-22	3.13941e-20
MEIS1	protein_coding	ENSG00000143995	-0.753287	3.64071	9.70652e-17	2.10442e-15
NT5DC4	protein_coding	ENSG00000144130	-1.51398	-2.99159	0.00291845	0.00891412
SLC20A1	protein_coding	ENSG00000144136	-0.868095	9.23334	1.23204e-41	1.35507e-39
LYG1	protein_coding	ENSG00000144214	1.05405	-0.0210753	2.97068e-06	1.69771e-05
NXPH2	protein_coding	ENSG00000144227	-1.56232	1.45758	2.28118e-25	9.77701e-24
PKP4	protein_coding	ENSG00000144283	0.627373	7.17831	6.39381e-21	2.04797e-19
SCN1A	protein_coding	ENSG00000144285	1.39642	-1.98214	1.35214e-06	8.24114e-06
GULP1	protein_coding	ENSG00000144366	-0.594861	2.37626	1.34272e-07	9.72113e-07
CCDC150	protein_coding	ENSG00000144395	0.840375	4.12697	5.15962e-24	2.03071e-22
CPO	protein_coding	ENSG00000144410	1.5694	-1.77744	1.47232e-06	8.92171e-06
ACKR3	protein_coding	ENSG00000144476	-0.995692	3.39007	4.11501e-22	1.418e-20
HES6	protein_coding	ENSG00000144485	-0.727905	1.87093	3.47915e-08	2.75352e-07
DIS3L2	protein_coding	ENSG00000144535	0.809848	4.56274	7.027e-28	3.48989e-26
2019-03-04	protein_coding	ENSG00000144583	0.713636	6.48166	7.01114e-26	3.12736e-24
CNTN4	protein_coding	ENSG00000144619	-0.781455	2.40629	3.74352e-13	5.62509e-12
GADL1	protein_coding	ENSG00000144644	1.5963	-3.48143	0.00371157	0.0109991
FAM198A	protein_coding	ENSG00000144649	-0.908673	-1.51598	0.00950159	0.0249199
GOLGA4	protein_coding	ENSG00000144674	0.788072	7.68159	1.70631e-27	8.30302e-26
LRIG1	protein_coding	ENSG00000144749	-0.966163	4.97062	1.21218e-41	1.33935e-39
TAGLN3	protein_coding	ENSG00000144834	-2.21029	-1.13407	3.93386e-14	6.50789e-13
MED12L	protein_coding	ENSG00000144893	-0.693217	3.31613	2.12034e-14	3.60428e-13
FAM86B2	protein_coding	ENSG00000145002	-1.30808	-1.72563	6.88892e-05	0.000308083
UCN2	protein_coding	ENSG00000145040	-0.615849	2.56284	4.6381e-10	4.74991e-09
EAF2	protein_coding	ENSG00000145088	-0.819833	0.0867397	0.000181513	0.000740893
VWA5B2	protein_coding	ENSG00000145198	-1.97875	2.94869	5.73286e-55	1.12266e-52
CENPC	protein_coding	ENSG00000145241	1.02657	4.70614	3.11365e-40	3.19142e-38
SCD5	protein_coding	ENSG00000145284	-0.864778	4.65365	4.06102e-29	2.19815e-27
TRMT10A	protein_coding	ENSG00000145331	0.643532	3.48411	3.15889e-12	4.27703e-11
[truncated: 2,898 more rows]

## Sheet: S_vs_G2_category
3prime_overlapping_ncRNA	1
antisense	436
[truncated: 27 more rows]

## Sheet: G2_vs_M
gene_names	bio_type	ensemble_id	logFC	logCPM	PValue	FDR
[truncated: 10,586 more rows]

[truncated: 3 more sheets: G2_vs_M_category, M_vs_G1, M_vs_G1_category]
