# Supplementary material for: The S-phase-induced lncRNA SUNO1 promotes cell proliferation by controlling YAP1/Hippo signaling pathway
Source: eLife. 2020 Oct 27;9:e55102. doi: 10.7554/eLife.55102 (PMC7591261; doi:10.7554/eLife.55102)
Supplement: Supplementary file 4. — Six sheets represent the detailed, full output from GSEA/GO/Kegg pathway analyses in this study. They correspond to data presented in Figure 1—figure supplement 2A, Figure 1—figure supplement 2B, Figure 1D, Figure 1—figure supplement 2C, respectively. [file elife-55102-supp4.xlsx]

## Sheet: GSEA_G1S_vs_S
	ID	Description	setSize	enrichmentScore	NES	pvalue	p.adjust	qvalues	rank	leading_edge	core_enrichment
GO:0002790	GO:0002790	peptide secretion	471	0.445668	1.5037	0.00100402	0.0324345	0.0282278	4783	tags=24%, list=20%, signal=20%	IL10/SUCNR1/LILRB1/FGB/IFNG/ILDR1/KRT20/GBP5/GPR68/IL1RL1/IGF1/AIM2/IL1B/HAVCR2/NR1H4/LCP2/GJA5/CRP/IL6/PLEK/ANO1/CCR7/POU2F2/PAX8/OSM/C5AR2/TNFAIP3/TNFRSF4/CSF1R/CD74/POSTN/ITGB6/VIP/HNF1B/NR1D1/TTN/MTTP/CD274/PAEP/LMF1/VGF/GHRL/CCL3/SYT4/FOXP3/CD200R1/INHBB/BMP6/IL4R/CD36/NLRP3/ZC3H12A/DPP4/GIPR/ADTRP/TLR10/PPARD/VEGFC/MBP/TNFRSF21/IL1R2/RAB3D/ARNTL/KCNG2/SLC2A1/ABAT/GBP1/CHGA/EGFR/KISS1/SSC5D/…
GO:0050865	GO:0050865	regulation of cell activation	415	0.524484	1.76379	0.00100402	0.0324345	0.0282278	5387	tags=36%, list=22%, signal=28%	IL10/GPR183/LILRB1/PLA2G2D/VCAM1/IFNG/IDO1/SIT1/IL1RL1/IGF1/IL23R/IL1B/HAVCR2/CCL2/TOX/TNFSF14/IL6/CNR2/PLEK/BTLA/VNN1/CCR7/MZB1/TBC1D10C/TNFRSF18/IL23A/TNFAIP3/LCK/TNFRSF4/ADGRE2/CD74/TEC/PTPN6/THBS1/PRDM1/TTBK1/IL12RB1/NR4A3/CD209/CD28/CD274/CD83/PDGFB/THBD/IL7R/SDC4/FOXP3/RUNX3/IRF4/FOXJ1/IL4R/NFATC2/HRG/NLRP3/ZC3H12A/DPP4/TBX21/PRKCD/CD55/RAC2/IL12B/CLCF1/CTLA4/ID2/CBFB/ITGAM/MPL/ADGRF5/EFNB3…
GO:0001525	GO:0001525	angiogenesis	444	0.458101	1.54507	0.00100503	0.0324345	0.0282278	4429	tags=27%, list=18%, signal=22%	CXCR3/IL10/CXCL8/CXCL10/FASLG/ANGPTL4/EREG/SH2D2A/SEMA4A/IL1B/ANGPT2/EPHA1/GJA5/TIE1/CCL2/EPGN/KLK3/IL6/F3/ESM1/FLT1/TNFAIP3/TBX1/S1PR1/LRG1/S100A1/FOXC2/APLNR/THBS1/THBS2/NR4A1/MMRN2/GHRL/SPHK1/HMGA2/NRP1/ADAMTS9/ITGB3/COL15A1/FGF1/HRG/PTGIS/ANPEP/BTG1/ENPEP/ZC3H12A/PECAM1/ETS1/ADM/PIK3CG/GPR4/PKNOX1/HGF/NGFR/ADTRP/CDH5/TNFRSF12A/ARHGAP22/ADGRG1/VEGFC/RSPO3/FZD8/CYBB/MINAR1/HIF3A/CX3CR1/PDGFRB/W…
GO:0006935	GO:0006935	chemotaxis	499	0.516956	1.74371	0.00100503	0.0324345	0.0282278	2773	tags=20%, list=12%, signal=18%	CXCR3/IL10/SUCNR1/GPR183/CXCL6/CXCL8/IL1RN/VCAM1/CXCL10/GDNF/CCR4/SERPIND1/CCL20/NTRK1/SEMA4A/RELN/MYPN/IL1B/GFRA1/ANGPT2/POU4F2/CXCL3/CCL2/CCL7/TNFSF14/CMKLR1/IL6/CNR2/F3/CCR7/CXCL5/CCR1/CCRL2/FLT1/IL23A/C5AR2/PDE4D/S1PR1/SAA2/ADGRE2/CSF1R/PLAU/CD74/IL36B/PDE4B/SEMA3A/THBS1/UNC5A/NR4A3/NR4A1/PTGDR2/EPHA4/CCL4/DSCAML1/VSTM2L/FOXD1/CMTM2/ITGA2/SEMA7A/PDGFB/CCL3/HBEGF/NRP1/PLXNA2/NRG1/CXCL11/FOSL1/…
GO:0040017	GO:0040017	positive regulation of locomotion	476	0.467723	1.57792	0.00100503	0.0324345	0.0282278	3707	tags=23%, list=15%, signal=20%	SUCNR1/CXCL8/CXCL10/IFNG/CCR4/CCL20/SEMA4A/RELN/IGF1/IL1B/CEMIP/IQCF1/EPHA1/CCL7/TNFSF14/CMKLR1/IL6/F3/P2RY6/VTN/CCR7/CCR1/TNFRSF18/FLT1/IL23A/S1PR1/CSF1R/CASS4/PLAU/CD74/POSTN/FOXC2/SEMA3A/THBS1/NR4A3/SLC8A1/MMP9/TACR1/CCL4/KITLG/CD274/ITGA2/SEMA7A/PDGFB/SPHK1/CCL3/HBEGF/HAS2/NRP1/TACR3/MAP2K3/ITGB3/PIK3CD/FGF1/CFAP69/S100A14/AZU1/ZC3H12A/ETS1/CDKN2B-AS1/RAC2/LAMC2/HGF/VEGFC/IGF1R/ICAM1/MYADM/PD…
GO:0042060	GO:0042060	wound healing	443	0.465612	1.57037	0.00100503	0.0324345	0.0282278	5577	tags=34%, list=23%, signal=27%	SERPINB2/FGB/SERPIND1/TRPC7/EREG/F2RL3/TFPI2/EPPK1/IL24/IGF1/TRIM72/LCP2/F13B/IL6/F3/CYP4F2/PLEK/VTN/ALOX15/TNFAIP3/LCK/PROC/PLAU/TEC/POSTN/FOXC2/PTPN6/THBS1/WFDC1/HIST1H3A/ITGA2/PDGFB/SH2B3/HBEGF/THBD/ADRA2B/SDC4/HIST1H3H/NRG1/P2RX1/DSP/MAFF/DGKI/CYP4F11/ITGB3/PIK3CD/PLAUR/CD36/HRG/CDH3/COL1A2/HIST1H3B/PECAM1/ETS1/PIK3CG/GPR4/GNA15/EYS/PRKCD/A2M/EHD1/ADTRP/PPARD/TNFRSF12A/MPL/H3F3B/PDGFRB/WNT7A/…
GO:0043410	GO:0043410	positive regulation of MAPK cascade	457	0.427054	1.43938	0.00100503	0.0324345	0.0282278	3387	tags=20%, list=14%, signal=17%	GPR183/FGB/IL1RN/DKK1/CCL20/NTRK1/KL/IGF1/IL11/IL1B/INSRR/HAVCR2/EPHA1/TIE1/CCL2/CCL7/EPGN/IL6/P2RY6/CCR7/ALOX15/CCR1/OSM/FLT1/C5AR2/TBX1/CSF1R/TGFA/CD74/IL36B/IGFBP3/DUSP5/FZD10/SEMA3A/THBS1/EPHA4/CCL4/CALCR/KITLG/SEMA7A/PDGFB/GHRL/CCL3/ADRA2B/WNT7B/NRP1/MST1R/NRG1/MAP2K3/FGD2/FGF1/CD36/LIF/DOK5/ZC3H12A/PIK3CG/HGF/GPR55/IGF1R/MAPK8IP2/ICAM1/FZD8/FGF4/PDGFRB/WNT7A/FGF2/NGF/SPRY2/IGFBP4/MIR222/XDH…
GO:0051272	GO:0051272	positive regulation of cellular component movement	459	0.450262	1.51803	0.00100503	0.0324345	0.0282278	3707	tags=23%, list=15%, signal=20%	CXCL8/CXCL10/IFNG/CCL20/SEMA4A/RELN/IGF1/IL1B/CEMIP/IQCF1/EPHA1/CCL7/TNFSF14/CMKLR1/IL6/F3/P2RY6/VTN/CCR7/CCR1/TNFRSF18/FLT1/IL23A/S1PR1/CSF1R/CASS4/PLAU/CD74/POSTN/FOXC2/SEMA3A/THBS1/NR4A3/SLC8A1/MMP9/TACR1/CCL4/KITLG/CD274/ITGA2/SEMA7A/PDGFB/SPHK1/CCL3/HBEGF/HAS2/NRP1/TACR3/MAP2K3/ITGB3/PIK3CD/FGF1/CFAP69/S100A14/ZC3H12A/ETS1/CDKN2B-AS1/RAC2/LAMC2/HGF/VEGFC/IGF1R/ICAM1/MYADM/PDGFRB/WNT7A/FGF2/T…
GO:2000147	GO:2000147	positive regulation of cell motility	448	0.459383	1.54847	0.00100503	0.0324345	0.0282278	3707	tags=24%, list=15%, signal=20%	CXCL8/CXCL10/IFNG/CCL20/SEMA4A/RELN/IGF1/IL1B/CEMIP/IQCF1/EPHA1/CCL7/TNFSF14/CMKLR1/IL6/F3/P2RY6/VTN/CCR7/CCR1/TNFRSF18/FLT1/IL23A/S1PR1/CSF1R/CASS4/PLAU/CD74/POSTN/FOXC2/SEMA3A/THBS1/NR4A3/SLC8A1/MMP9/TACR1/CCL4/KITLG/CD274/ITGA2/SEMA7A/PDGFB/SPHK1/CCL3/HBEGF/HAS2/NRP1/TACR3/MAP2K3/ITGB3/PIK3CD/FGF1/CFAP69/S100A14/ZC3H12A/ETS1/CDKN2B-AS1/RAC2/LAMC2/HGF/VEGFC/IGF1R/ICAM1/MYADM/PDGFRB/WNT7A/FGF2/T…
GO:0002253	GO:0002253	activation of immune response	425	0.48491	1.63163	0.00100604	0.0324345	0.0282278	4352	tags=25%, list=18%, signal=21%	TLR7/GPR32/FGB/MUC13/BIRC3/MUC2/AIM2/CPN2/TRIM15/HAVCR2/NR1H4/KLHL6/ESR1/LCP2/IRGM/CRP/CMKLR1/VTN/CCR7/DMBT1/C5AR2/PDE4D/CACNA1F/TNFAIP3/LCK/MYO1G/FYB1/TEC/S100A1/RELB/PDE4B/PTPN6/CTSS/NR4A3/CD209/NR1D1/MUC16/CD28/MATR3/FOXP3/IRF4/MUC5AC/PIK3CD/NFKB1/CD36/NFATC2/S100A14/ZC3H12A/MUC12/PRKCD/A2M/CD55/SARM1/CTLA4/BTNL8/TLR10/CBFB/ITGAM/TNIP3/MUC15/TNFRSF21/ZAP70/IKBKE/IRAK3/GBP1/IRAK2/NCR3/TRAF3/MAR…
GO:0006875	GO:0006875	cellular metal ion homeostasis	446	0.428009	1.44299	0.00100604	0.0324345	0.0282278	3129	tags=18%, list=13%, signal=16%	LPAR6/CXCR3/GPR32/CXCL10/CCR4/FASLG/TRPC7/F2RL3/CHRNA9/CEMIP/ATP13A5/ESR1/CCL7/GPR65/CMKLR1/GRIN2A/STC1/P2RY6/CCR7/CCR1/CCRL2/TRPC4/C5AR2/PDE4D/LCK/S1PR1/PTGER1/NTSR1/PRND/TGM2/ATP2C2/CALB1/PTPN6/APLNR/BDKRB2/MCHR1/SLC8A1/TACR1/TRPV6/CALCR/DMD/GHRL/CCL3/CXCL11/P2RX1/BMP6/CNGB1/PTGIR/CD36/GPR17/HERPUD1/ATP2B2/RASA3/GRIN2D/ADM/PIK3CG/GPR4/GNA15/GIPR/CD55/TRPM8/GPR55/MT1G/SLC39A12/CXCL9/CX3CR1/FGF2/…
GO:0009306	GO:0009306	protein secretion	447	0.445378	1.50125	0.00100604	0.0324345	0.0282278	4714	tags=23%, list=20%, signal=19%	IL10/SUCNR1/LILRB1/FGB/IFNG/KRT20/GBP5/GPR68/IL1RL1/IGF1/AIM2/IL1B/HAVCR2/NR1H4/LCP2/GJA5/CRP/IL6/PLEK/ANO1/CCR7/POU2F2/OSM/C5AR2/TNFAIP3/TNFRSF4/CSF1R/POSTN/ITGB6/VIP/HNF1B/NR1D1/TTN/MTTP/CD274/PAEP/LMF1/VGF/GHRL/CCL3/SYT4/FOXP3/CD200R1/INHBB/BMP6/IL4R/CD36/NLRP3/ZC3H12A/DPP4/GIPR/ADTRP/TLR10/PPARD/VEGFC/MBP/TNFRSF21/IL1R2/RAB3D/ARNTL/KCNG2/SLC2A1/ABAT/GBP1/CHGA/EGFR/SSC5D/PER2/TLR5/EPHA5/DRD4/E…
GO:0009617	GO:0009617	response to bacterium	430	0.580807	1.95456	0.00100604	0.0324345	0.0282278	2933	tags=25%, list=12%, signal=22%	CSF3/HIST1H2BG/IL10/CXCL6/LILRB1/CXCL8/FGB/IL1RN/VCAM1/CXCL10/MPO/LRAT/CCR4/FASLG/IDO1/CCL20/CSF2/GBP5/IL24/IL23R/IL1B/IFNE/HAVCR2/NR1H4/KLHL6/CEACAM20/IRGM/HIST1H2BC/CXCL3/CCL2/KLK3/RNASE7/CRP/HIST1H2BF/IL6/CNR2/CCR7/DMBT1/CXCL5/HIST1H2BJ/TH/FABP4/IL23A/MS4A1/PDE4D/TNFAIP3/CD160/PTGER1/LRG1/SCN7A/CSF2RB/NUGGC/REN/IL36B/HIST1H2BK/PDE4B/CYP1A1/BCL3/NR1D1/CD274/HTN1/VGF/CCL3/THBD/PRG2/ADAMTS9/CUBN/…
GO:0009636	GO:0009636	response to toxic substance	426	0.41471	1.39575	0.00100604	0.0324345	0.0282278	3711	tags=18%, list=15%, signal=16%	CSF3/IL10/VCAM1/MPO/NTRK1/CHRND/RGS4/PTGS1/LOXHD1/CCL7/RGS2/GRIN2A/IL6/CNR2/AREG/TH/DHRS2/OPRD1/TNFAIP3/CES1/SLC6A4/TPO/ACTC1/CYP1A1/ND6/NR4A3/SLC8A1/CCL4/PDGFB/FOXO1/SLC2A4/GPX5/CCL3/NPPC/TXNRD1/FOSL1/NFKB1/MAOB/MB/CD36/KCNMB1/WDR35/NR4A2/ZC3H12A/ETS1/PRKCD/CDO1/HGF/KDM6B/MT1G/ICAM1/CYBB/MBP/IYD/PDGFRB/CLDN1/ABAT/TRPC6/CYP2E1/DDC/MT2A/KPNA4/CHRNB2/DRD4/PPIF/SRXN1/TNF/ALOX5AP/INMT/TNC/MAPK13/UBIA…
GO:0010817	GO:0010817	regulation of hormone levels	409	0.417246	1.4024	0.00100604	0.0324345	0.0282278	4684	tags=24%, list=19%, signal=20%	FGB/LRAT/IFNG/RDH8/ILDR1/SLC5A7/GPR68/IL11/IL1B/NR1H4/ESR1/FOXA1/HSD17B2/IL6/AWAT2/ANO1/SCG5/PAX8/SOX8/OSM/DHRS2/REN/VIP/TPO/SULT1B1/SRD5A2/CYP1A1/HNF1B/NR1D1/PCSK1/FOXD1/CYP11A1/VGF/GHRL/ADRA2B/TBX3/INHBB/BMP6/DIO2/NFKB1/LIF/ENPEP/DPP4/RDH10/CYP19A1/ADM/GIPR/PPARD/SERPINA6/IYD/ARNTL/CHST8/KCNG2/NGF/SLC2A1/ABAT/TAC1/BMP2/CHGA/INHBA/EGFR/ALDH8A1/KISS1/PER2/TSPOAP1/EPHA5/BCO2/TNF/CHAT/RAB8B/MIDN/SD…
GO:0050878	GO:0050878	regulation of body fluid levels	396	0.452877	1.52141	0.00100604	0.0324345	0.0282278	5511	tags=31%, list=23%, signal=24%	SERPINB2/FGB/SERPIND1/FLI1/TRPC7/F2RL3/TFPI2/LCP2/GJA5/SLC22A2/F13B/NPR3/IL6/F3/CYP4F2/PLEK/ADCY8/VTN/AQP3/LCK/PROC/PLAU/TEC/VIP/PTPN6/APLNR/THBS1/TP63/HIST1H3A/ITGA2/PDGFB/SH2B3/THBD/HAS2/ADRA2B/HIST1H3H/P2RX1/MAFF/DGKI/CYP4F11/ITGB3/PIK3CD/PLAUR/CD36/HRG/COL1A2/HIST1H3B/ADM/PIK3CG/GNA15/PRKCD/A2M/EHD1/CDO1/ADTRP/MPL/H3F3B/NEURL1/BTC/CLDN1/ABAT/TRPC6/XDH/TAC1/SCNN1B/PRKAR1B/CHRM3/ADCY2/CD59/RCOR…
GO:0002521	GO:0002521	leukocyte differentiation	393	0.553648	1.85956	0.00100705	0.0324345	0.0282278	4372	tags=29%, list=18%, signal=24%	CSF3/DCSTAMP/IL10/GPR183/LILRB1/PLA2G2D/VCAM1/IFNG/LYL1/NTRK1/CSF2/GPR68/SEMA4A/IL11/IL23R/WNT1/IFNE/POU4F2/TOX/IL6/SIGLEC15/VNN1/CCR7/POU2F2/CCR1/TNFRSF18/DHRS2/IL23A/LCK/RHOH/IL34/CSF1R/TCF7/CD74/EVI2B/RELB/PTPN6/PRDM1/IL12RB1/BCL3/MMP9/CD28/KITLG/CD83/CCL3/IL7R/FOXP3/RUNX3/IRF4/FOXJ1/JUNB/PIK3CD/MAFB/IL4R/NFATC2/LIF/NLRP3/KLF10/ZC3H12A/RORC/TBX21/TRIB1/IL12B/PKNOX1/CLCF1/GPR55/LFNG/CTLA4/MT1G/…
GO:0002694	GO:0002694	regulation of leukocyte activation	382	0.527418	1.7708	0.00100705	0.0324345	0.0282278	5355	tags=36%, list=22%, signal=28%	IL10/GPR183/LILRB1/PLA2G2D/VCAM1/IFNG/IDO1/SIT1/IL1RL1/IGF1/IL23R/IL1B/HAVCR2/CCL2/TOX/TNFSF14/IL6/CNR2/BTLA/VNN1/CCR7/MZB1/TBC1D10C/TNFRSF18/IL23A/TNFAIP3/LCK/TNFRSF4/ADGRE2/CD74/PTPN6/THBS1/PRDM1/TTBK1/IL12RB1/NR4A3/CD209/CD28/CD274/CD83/IL7R/SDC4/FOXP3/RUNX3/IRF4/FOXJ1/IL4R/NFATC2/NLRP3/ZC3H12A/DPP4/TBX21/CD55/RAC2/IL12B/CLCF1/CTLA4/ID2/CBFB/ITGAM/MPL/ADGRF5/EFNB3/TNFRSF21/ZAP70/LOXL3/TAC1/IL2…
GO:0002764	GO:0002764	immune response-regulating signaling pathway	393	0.486351	1.63352	0.00100705	0.0324345	0.0282278	4352	tags=25%, list=18%, signal=21%	TLR7/GPR32/LILRB1/FGB/MUC13/BIRC3/MUC2/TRIM15/HAVCR2/NR1H4/KLHL6/ESR1/LCP2/IRGM/CMKLR1/BTLA/CCR7/DMBT1/C5AR2/PDE4D/CACNA1F/TNFAIP3/LCK/MYO1G/FYB1/TEC/S100A1/RELB/PDE4B/PTPN6/CTSS/NR4A3/CD209/NR1D1/MUC16/CD28/FOXP3/IRF4/CD200R1/MUC5AC/PIK3CD/NFKB1/CD36/NFATC2/S100A14/PIGR/ZC3H12A/MUC12/PRKCD/SARM1/CTLA4/BTNL8/TLR10/CBFB/ITGAM/TNIP3/MUC15/TNFRSF21/ZAP70/IKBKE/IRAK3/GBP1/IRAK2/NCR3/TRAF3/MARCO/LIMK1…
GO:0002791	GO:0002791	regulation of peptide secretion	369	0.444226	1.49048	0.00100705	0.0324345	0.0282278	3303	tags=18%, list=14%, signal=16%	IL10/LILRB1/FGB/IFNG/ILDR1/KRT20/GPR68/IL1RL1/IGF1/AIM2/IL1B/HAVCR2/NR1H4/GJA5/CRP/IL6/ANO1/CCR7/PAX8/OSM/C5AR2/TNFAIP3/TNFRSF4/CSF1R/CD74/POSTN/NR1D1/TTN/CD274/PAEP/GHRL/CCL3/SYT4/FOXP3/CD200R1/INHBB/BMP6/IL4R/NLRP3/ZC3H12A/DPP4/GIPR/ADTRP/TLR10/PPARD/VEGFC/MBP/TNFRSF21/IL1R2/ARNTL/KCNG2/SLC2A1/ABAT/GBP1/CHGA/EGFR/KISS1/SSC5D/PER2/TLR5/EPHA5/DRD4/EZR/BTN2A2/TNF/FN1/FOXP1
GO:0030335	GO:0030335	positive regulation of cell migration	436	0.455849	1.5348	0.00100705	0.0324345	0.0282278	3707	tags=23%, list=15%, signal=20%	CXCL8/CXCL10/IFNG/CCL20/SEMA4A/RELN/IGF1/IL1B/CEMIP/EPHA1/CCL7/TNFSF14/CMKLR1/IL6/F3/P2RY6/VTN/CCR7/CCR1/TNFRSF18/FLT1/IL23A/S1PR1/CSF1R/CASS4/PLAU/CD74/POSTN/FOXC2/SEMA3A/THBS1/NR4A3/SLC8A1/MMP9/CCL4/KITLG/CD274/ITGA2/SEMA7A/PDGFB/SPHK1/CCL3/HBEGF/HAS2/NRP1/MAP2K3/ITGB3/PIK3CD/FGF1/S100A14/ZC3H12A/ETS1/CDKN2B-AS1/RAC2/LAMC2/HGF/VEGFC/IGF1R/ICAM1/MYADM/PDGFRB/WNT7A/FGF2/TMEM102/SPRY2/MIR222/TAC1/…
GO:0055074	GO:0055074	calcium ion homeostasis	358	0.469805	1.57412	0.00100705	0.0324345	0.0282278	2151	tags=17%, list=9%, signal=16%	LPAR6/CXCR3/GPR32/CXCL10/CCR4/FASLG/TRPC7/KL/F2RL3/CHRNA9/CEMIP/ATP13A5/ESR1/CCL7/GPR65/CMKLR1/GRIN2A/STC1/P2RY6/CCR7/CCR1/CCRL2/TRPC4/C5AR2/PDE4D/LCK/S1PR1/PTGER1/NTSR1/TGM2/ATP2C2/CALB1/PTPN6/APLNR/BDKRB2/MCHR1/SLC8A1/TACR1/TRPV6/CALCR/DMD/GHRL/CCL3/CXCL11/P2RX1/CNGB1/PTGIR/CD36/S100A14/GPR17/HERPUD1/ATP2B2/RASA3/GRIN2D/ADM/PIK3CG/GPR4/GNA15/GIPR/CD55/TRPM8/GPR55
GO:0070838	GO:0070838	divalent metal ion transport	384	0.413402	1.38757	0.00100705	0.0324345	0.0282278	3711	tags=22%, list=15%, signal=19%	LILRB1/CXCL10/FASLG/TRPC7/F2RL3/RRAD/CHRNA9/RGS4/CEMIP/CCL2/GRIN2A/STC1/CAMK2A/P2RY6/CCR7/CCR1/TRPC4/PDE4D/OPRD1/CACNA1F/LCK/NTSR1/REM1/ATP2C2/BHLHA15/S100A1/PDE4B/PTPN6/APLNR/MCHR1/SLC8A1/CACNG8/CCL4/TRPV6/CALCR/GEM/DMD/PDGFB/CCL3/NALCN/HSPA2/TMC1/CXCL11/P2RX1/STAC2/IL1RAPL1/ATP2B2/RASA3/GRIN2D/PIK3CG/TRPM8/CATSPER1/CAMK2B/ICAM1/SLC39A12/SLC39A2/CXCL9/NIPAL2/PDGFRB/FGF2/TRPM3/GJA4/TRPC6/CACNG5/R…
GO:0072507	GO:0072507	divalent inorganic cation homeostasis	388	0.459279	1.54224	0.00100705	0.0324345	0.0282278	3658	tags=23%, list=15%, signal=20%	LPAR6/CXCR3/GPR32/CXCL10/CCR4/FASLG/TRPC7/KL/F2RL3/CHRNA9/CEMIP/ATP13A5/ESR1/CCL7/GPR65/CMKLR1/GRIN2A/STC1/P2RY6/CCR7/CCR1/CCRL2/TRPC4/C5AR2/PDE4D/LCK/S1PR1/PTGER1/NTSR1/TGM2/ATP2C2/CALB1/PTPN6/APLNR/BDKRB2/MCHR1/TMC8/SLC8A1/TACR1/TRPV6/CALCR/DMD/GHRL/CCL3/CXCL11/P2RX1/CNGB1/PTGIR/CD36/S100A14/GPR17/HERPUD1/ATP2B2/RASA3/GRIN2D/ADM/PIK3CG/GPR4/GNA15/GIPR/CD55/TRPM8/GPR55/MT1G/SLC39A12/CXCL9/CX3CR1…
GO:0002757	GO:0002757	immune response-activating signal transduction	371	0.478604	1.60547	0.00100806	0.0324345	0.0282278	4352	tags=25%, list=18%, signal=21%	TLR7/GPR32/FGB/MUC13/BIRC3/MUC2/TRIM15/HAVCR2/NR1H4/KLHL6/ESR1/LCP2/IRGM/CMKLR1/CCR7/DMBT1/C5AR2/PDE4D/CACNA1F/TNFAIP3/LCK/MYO1G/FYB1/TEC/S100A1/RELB/PDE4B/PTPN6/CTSS/NR4A3/CD209/NR1D1/MUC16/CD28/FOXP3/IRF4/MUC5AC/PIK3CD/NFKB1/CD36/NFATC2/S100A14/ZC3H12A/MUC12/PRKCD/SARM1/CTLA4/BTNL8/TLR10/CBFB/ITGAM/TNIP3/MUC15/TNFRSF21/ZAP70/IKBKE/IRAK3/GBP1/IRAK2/NCR3/TRAF3/MARCO/LIMK1/TLR5/LAT/EZR/BTN2A2/NFKB…
GO:0072503	GO:0072503	cellular divalent inorganic cation homeostasis	373	0.457703	1.53552	0.00100806	0.0324345	0.0282278	3129	tags=20%, list=13%, signal=18%	LPAR6/CXCR3/GPR32/CXCL10/CCR4/FASLG/TRPC7/F2RL3/CHRNA9/CEMIP/ATP13A5/ESR1/CCL7/GPR65/CMKLR1/GRIN2A/STC1/P2RY6/CCR7/CCR1/CCRL2/TRPC4/C5AR2/PDE4D/LCK/S1PR1/PTGER1/NTSR1/TGM2/ATP2C2/CALB1/PTPN6/APLNR/BDKRB2/MCHR1/SLC8A1/TACR1/TRPV6/CALCR/DMD/GHRL/CCL3/CXCL11/P2RX1/CNGB1/PTGIR/CD36/GPR17/HERPUD1/ATP2B2/RASA3/GRIN2D/ADM/PIK3CG/GPR4/GNA15/GIPR/CD55/TRPM8/GPR55/MT1G/SLC39A12/CXCL9/CX3CR1/FGF2/TRPC6/TAC1…
GO:0010469	GO:0010469	regulation of signaling receptor activity	363	0.589827	1.97578	0.00100908	0.0324345	0.0282278	4184	tags=36%, list=17%, signal=30%	CSF3/IL10/CXCL6/CXCL8/IL1RN/CXCL10/GDNF/DKK1/IFNG/FASLG/CCL20/CSF2/NPTX1/EREG/KL/HEYL/RELN/IL24/IGF1/UCN2/IL11/IL1B/WNT1/IFNE/CXCL3/CCL2/CCL7/EPGN/TNFSF14/FGF3/IL6/STC1/INSL4/NDP/AREG/TNFSF15/PDYN/CXCL5/OSM/SHISA7/IL23A/PDE4D/IL34/FGF5/TGFA/PLAU/IL36B/VIP/CDC42EP2/CACNG8/CCL4/TNFRSF11B/ERRFI1/CALCR/KITLG/CMTM2/PDGFB/VGF/GHRL/CCL3/GAST/HBEGF/ADRA2B/WNT7B/NPPC/NRP1/PTHLH/NRG1/CXCL11/INHBB/BMP6/FGF1…
GO:0072511	GO:0072511	divalent inorganic cation transport	386	0.414177	1.38869	0.00101112	0.0324345	0.0282278	3711	tags=22%, list=15%, signal=19%	LILRB1/CXCL10/FASLG/TRPC7/F2RL3/RRAD/CHRNA9/RGS4/CEMIP/CCL2/GRIN2A/STC1/CAMK2A/P2RY6/CCR7/CCR1/TRPC4/PDE4D/OPRD1/CACNA1F/LCK/NTSR1/REM1/ATP2C2/BHLHA15/S100A1/PDE4B/PTPN6/APLNR/MCHR1/SLC8A1/CACNG8/CCL4/TRPV6/CALCR/GEM/DMD/PDGFB/CCL3/NALCN/HSPA2/TMC1/CXCL11/P2RX1/STAC2/IL1RAPL1/ATP2B2/RASA3/GRIN2D/PIK3CG/TRPM8/CATSPER1/CAMK2B/ICAM1/SLC39A12/SLC39A2/CXCL9/NIPAL2/PDGFRB/FGF2/TCN1/TRPM3/GJA4/TRPC6/CAC…
GO:0002683	GO:0002683	negative regulation of immune system process	347	0.472847	1.58018	0.00101215	0.0324345	0.0282278	5482	tags=35%, list=23%, signal=28%	IL10/OTOP1/LILRB1/PLA2G2D/IDO1/GPR68/IL1RL1/HAVCR2/CCL2/HIST1H4D/CNR2/NLRC3/ALOX15/TBC1D10C/C5AR2/TNFAIP3/TNFRSF4/HIST2H4B/HIST1H4H/CD74/PTPN6/THBS1/SERPINB4/AMBP/NR1D1/HIST1H4J/KITLG/CD274/CCL3/IL7R/SDC4/FOXP3/RUNX3/IRF4/CD200R1/FOXJ1/FCRLB/MAFB/IL4R/HLA-DOB/GPR17/ZC3H12A/CYP19A1/TBX21/TRIB1/A2M/CD55/IL12B/GPR55/SARM1/ADTRP/CTLA4/ID2/CBFB/ADGRF5/HIST1H4E/TNFRSF21/LOXL3/IRAK3/GREM1/MIR222/GBP1/IL…
GO:0006874	GO:0006874	cellular calcium ion homeostasis	350	0.466483	1.55962	0.00101215	0.0324345	0.0282278	2151	tags=17%, list=9%, signal=16%	LPAR6/CXCR3/GPR32/CXCL10/CCR4/FASLG/TRPC7/F2RL3/CHRNA9/CEMIP/ATP13A5/ESR1/CCL7/GPR65/CMKLR1/GRIN2A/STC1/P2RY6/CCR7/CCR1/CCRL2/TRPC4/C5AR2/PDE4D/LCK/S1PR1/PTGER1/NTSR1/TGM2/ATP2C2/CALB1/PTPN6/APLNR/BDKRB2/MCHR1/SLC8A1/TACR1/TRPV6/CALCR/DMD/GHRL/CCL3/CXCL11/P2RX1/CNGB1/PTGIR/CD36/GPR17/HERPUD1/ATP2B2/RASA3/GRIN2D/ADM/PIK3CG/GPR4/GNA15/GIPR/CD55/TRPM8/GPR55
GO:0030099	GO:0030099	myeloid cell differentiation	348	0.468173	1.56476	0.00101215	0.0324345	0.0282278	4372	tags=24%, list=18%, signal=20%	CSF3/DCSTAMP/GPR183/LILRB1/IFNG/FLI1/CSF2/GPR68/IL11/IL23R/POU4F2/HIST1H4D/SIGLEC15/CCR7/CCR1/DHRS2/IL23A/IL34/HIST2H4B/CSF1R/HIST1H4H/CD74/EVI2B/RELB/PTPN6/THBS1/NR4A3/HIST1H3A/MMP9/HIST1H4J/KITLG/TRIM10/CCL3/IRF4/HIST1H3H/JUNB/PIK3CD/MAFB/MB/LIF/KLF10/HIST1H3B/TRIB1/ETS1/IL12B/PKNOX1/GPR55/MT1G/ID2/CBFB/MPL/ADGRF5/H3F3B/HIST1H4E/BATF2/MIR222/INHBA/MYC/HIST4H4/CDKN2B/LYAR/MIR221/TGFBR2/TNF/ETV2/…
GO:0042110	GO:0042110	T cell activation	348	0.55539	1.85626	0.00101215	0.0324345	0.0282278	4364	tags=31%, list=18%, signal=26%	IL10/GPR183/LILRB1/PLA2G2D/VCAM1/IFNG/IDO1/SIT1/SEMA4A/IGF1/IL23R/IL1B/WNT1/IFNE/HAVCR2/CCL2/TNFSF14/IL6/NLRC3/BTLA/VNN1/CCR7/TNFRSF18/IL23A/LCK/RHOH/TNFRSF4/TCF7/CD74/RELB/PTPN6/PRDM1/IL12RB1/BCL3/CD209/CD28/LCP1/CD274/CD83/IL7R/SDC4/FOXP3/RUNX3/IRF4/FOXJ1/PIK3CD/MAFB/IL4R/NFATC2/TREML2/NLRP3/ZC3H12A/DPP4/RORC/CTPS1/TBX21/PIK3CG/CD55/RAC2/IL12B/PKNOX1/LFNG/CTLA4/CBFB/ICAM1/FZD8/EFNB3/TNFRSF21/ZA…
GO:0043062	GO:0043062	extracellular structure organization	350	0.532375	1.77992	0.00101215	0.0324345	0.0282278	5843	tags=41%, list=24%, signal=32%	FGB/VCAM1/MPO/HAS1/NPHS1/DMP1/ADAMTS4/VTN/PTX3/LAMA3/MMP1/MATN1/POSTN/COL19A1/ITGB6/THBS1/LIPG/CTSS/BCL3/LAMB3/MMP3/MMP9/TNFRSF11B/LCP1/CRISPLD2/MTTP/COL2A1/ITGA2/PDGFB/HAS2/VCAN/ITGA8/SDC4/MMP13/ADAMTS9/MYH11/LIPC/ITGB3/MMP10/COL9A3/COL15A1/CD36/COL6A3/ITGAD/LAMA4/COL1A2/DPP4/PECAM1/ETS1/COL22A1/A2M/NFKB2/LAMC2/ADTRP/ITGAM/NID2/NOXO1/ICAM1/TNFRSF1B/CHADL/FGF2/LOXL3/COL24A1/SPINT2/GREM1/PHLDB2/CD…
GO:0050708	GO:0050708	regulation of protein secretion	349	0.442341	1.47886	0.00101215	0.0324345	0.0282278	3303	tags=18%, list=14%, signal=16%	IL10/LILRB1/FGB/IFNG/KRT20/GPR68/IL1RL1/IGF1/AIM2/IL1B/HAVCR2/NR1H4/GJA5/CRP/IL6/ANO1/CCR7/OSM/C5AR2/TNFAIP3/TNFRSF4/CSF1R/POSTN/NR1D1/TTN/CD274/PAEP/GHRL/CCL3/SYT4/FOXP3/CD200R1/INHBB/BMP6/IL4R/NLRP3/ZC3H12A/DPP4/GIPR/ADTRP/TLR10/PPARD/VEGFC/MBP/TNFRSF21/IL1R2/ARNTL/KCNG2/SLC2A1/ABAT/GBP1/CHGA/EGFR/SSC5D/PER2/TLR5/EPHA5/DRD4/EZR/BTN2A2/TNF/FN1/FOXP1
GO:0019932	GO:0019932	second-messenger-mediated signaling	346	0.4456	1.48815	0.00101317	0.0324345	0.0282278	3895	tags=25%, list=16%, signal=21%	CXCR3/CXCL8/VCAM1/CXCL10/CCR4/CCL20/IGF1/UCN2/IRGM/RGS2/GPR65/CMKLR1/GRIN2A/PLEK/RASD1/P2RY6/ADCY8/CCR7/CCR1/CCRL2/TBC1D10C/ADRA1D/PDE4D/PTGER1/ADGRE2/PDE3A/BHLHA15/MC5R/VIP/APLNR/THBS1/SLC8A1/PTGDR2/CCL4/CALCR/DMD/SPHK1/CCL3/ADRA2B/ADRB1/NPPC/PTHLH/NRG1/CXCL11/GPR61/ADGRG7/PTGIR/CD36/NFATC2/AZU1/GRIN2D/ADM/RASD2/GIPR/ADGRG1/GPR3/CXCL9/ZAP70/CX3CR1/ADGRG6/ADGRL4/GBP1/CHGA/EGFR/PRKAR1B/RAMP1/EPHA5…
GO:1903706	GO:1903706	regulation of hemopoiesis	345	0.49362	1.64853	0.00101317	0.0324345	0.0282278	3924	tags=24%, list=16%, signal=20%	CSF3/DCSTAMP/LILRB1/IFNG/CSF2/GPR68/IL23R/TCIM/POU4F2/HIST1H4D/TOX/SIGLEC15/VNN1/CCR1/TNFRSF18/IL23A/IL34/HIST2H4B/HIST1H4H/CD74/EVI2B/PTPN6/THBS1/PRDM1/IL12RB1/NR4A3/HIST1H3A/HIST1H4J/CD28/KITLG/CD83/CCL3/IL7R/FOXP3/RUNX3/IRF4/HIST1H3H/FOXJ1/MAFB/IL4R/NFATC2/LIF/NLRP3/KLF10/HIST1H3B/ZC3H12A/TBX21/TRIB1/ETS1/IL12B/GPR55/CTLA4/ID2/CBFB/MPL/H3F3B/HIST1H4E/ZAP70/LOXL3/MIR222/INHBA/MYC/HIST4H4/MIR221…
GO:0045785	GO:0045785	positive regulation of cell adhesion	332	0.547262	1.82409	0.00101523	0.0324345	0.0282278	5355	tags=37%, list=22%, signal=29%	IL10/LILRB1/FGB/VCAM1/IFNG/IGF1/IL23R/IL1B/HAVCR2/EPHA1/FOXA1/CCL2/TNFSF14/IL6/DMP1/BTLA/VNN1/VTN/CCR7/ALOX15/TNFRSF18/IL23A/LCK/MIP/TGM2/CASS4/CD74/FOXC2/PTPN6/IL12RB1/NR4A3/CD209/FMN1/CD28/MMRN2/CD274/ITGA2/CD83/HAS2/IL7R/SDC4/FOXP3/RUNX3/NRP1/IL4R/CD36/HRG/NLRP3/AZU1/DPP4/ETS1/CD55/IL12B/CTLA4/ADGRG1/CBFB/ICAM1/EFNB3/ZAP70/MYADM/COL26A1/TMEM102/CD44/NPNT/NEDD9/FBLN2/ADAM19/TGFBR2/FRMD5/BTN2A2/…
GO:0001819	GO:0001819	positive regulation of cytokine production	336	0.485993	1.62044	0.00101626	0.0324345	0.0282278	4674	tags=25%, list=19%, signal=21%	IL10/TLR7/IL1RN/IFNG/IDO1/CSF2/BIRC3/GBP5/EREG/IL1RL1/IL23R/AIM2/IL1B/TRIM15/HAVCR2/CEACAM20/IL6/CCR7/OSM/IL23A/PDE4D/CSF1R/CD74/IL36B/POSTN/PDE4B/THBS1/IL12RB1/BCL3/NR4A3/CD28/TNFRSF8/CD274/PAEP/CD83/SEMA7A/CCL3/FOXP3/IRF4/NFKB1/IL4R/CD36/NLRP3/AZU1/NFKB2/IL12B/HGF/CYBB/MBP/LTB/IL27RA/SPN/DDX21/IL18R1/TLR5/ZBTB20/TNF/MAPK13/SERPINE1/PTPRC/IRF1/TMEM173/SMAD3/RUNX1/IL6R/IL4/DRD2/CD276/RASGRP1/TLR1…
GO:0018108	GO:0018108	peptidyl-tyrosine phosphorylation	336	0.502587	1.67577	0.00101626	0.0324345	0.0282278	4418	tags=31%, list=18%, signal=26%	CSF3/IFNG/NTRK1/CSF2/EREG/RELN/IL24/IGF1/IL11/IL23R/INSRR/EPHA1/TIE1/EPGN/FGF3/IL6/DOK7/AREG/VTN/SRMS/OSM/TNFRSF18/FLT1/IL23A/LCK/SLA/FGF5/CSF2RB/CSF1R/TGFA/CASS4/CD74/TEC/PTPN6/TTBK1/EPHA4/ERRFI1/TTN/KITLG/PDGFB/GHRL/HBEGF/NRP1/MST1R/PTK6/NRG1/MAP2K3/ITGB3/FGF1/CD36/HRG/LIF/PECAM1/PRKCD/IL12B/CLCF1/HGF/IGF1R/ICAM1/EFNB3/NEURL1/FGF4/ZAP70/BTC/PDGFRB/FGF2/TMEM102/GREM1/CD44/NEDD9/EGFR/CSPG4/EPHA5/…
GO:0031349	GO:0031349	positive regulation of defense response	336	0.525024	1.75058	0.00101626	0.0324345	0.0282278	2869	tags=19%, list=12%, signal=17%	SUCNR1/TLR7/FGB/IDO1/MUC13/BIRC3/GBP5/SH2D1B/EREG/MUC2/IL1RL1/AIM2/IL1B/TRIM15/HAVCR2/NR1H4/ESR1/IRGM/IL6/CCR7/DMBT1/OSM/FABP4/IL23A/TNFAIP3/TGM2/S100A1/RELB/CTSS/TTBK1/CD209/NR1D1/MUC16/CD28/ITGA2/CCL3/MATR3/IRF4/MUC5AC/NFKB1/CD36/S100A14/ETS1/RAET1E/MUC12/PIK3CG/PRKCD/IL12B/SARM1/TLR10/ITGAM/TNIP3/MUC15/RAET1E/IKBKE/IRAK3/TAC1/IRAK2/FAM19A3/NCR3/TRAF3/EGFR/MARCO
GO:0006816	GO:0006816	calcium ion transport	341	0.429655	1.43322	0.00101729	0.0324345	0.0282278	3711	tags=22%, list=15%, signal=19%	LILRB1/CXCL10/FASLG/TRPC7/F2RL3/RRAD/CHRNA9/RGS4/CEMIP/CCL2/GRIN2A/STC1/CAMK2A/P2RY6/CCR7/CCR1/TRPC4/PDE4D/OPRD1/CACNA1F/LCK/NTSR1/REM1/ATP2C2/BHLHA15/S100A1/PDE4B/PTPN6/APLNR/MCHR1/SLC8A1/CACNG8/CCL4/TRPV6/CALCR/GEM/DMD/PDGFB/CCL3/NALCN/HSPA2/TMC1/CXCL11/P2RX1/STAC2/IL1RAPL1/ATP2B2/RASA3/GRIN2D/PIK3CG/TRPM8/CATSPER1/CAMK2B/ICAM1/CXCL9/PDGFRB/FGF2/TRPM3/GJA4/TRPC6/CACNG5/RAMP1/CACNB4/ATP2B1/CHRNB…
GO:0018212	GO:0018212	peptidyl-tyrosine modification	339	0.500648	1.66881	0.00101833	0.0324345	0.0282278	4418	tags=31%, list=18%, signal=25%	CSF3/IFNG/NTRK1/CSF2/EREG/RELN/IL24/IGF1/IL11/IL23R/INSRR/EPHA1/TIE1/EPGN/FGF3/IL6/DOK7/AREG/VTN/SRMS/OSM/TNFRSF18/FLT1/IL23A/LCK/SLA/FGF5/CSF2RB/CSF1R/TGFA/CASS4/CD74/TEC/PTPN6/TTBK1/EPHA4/ERRFI1/TTN/KITLG/PDGFB/GHRL/HBEGF/NRP1/MST1R/PTK6/NRG1/MAP2K3/ITGB3/FGF1/CD36/HRG/LIF/PECAM1/PRKCD/IL12B/CLCF1/HGF/IGF1R/ICAM1/EFNB3/NEURL1/FGF4/ZAP70/BTC/PDGFRB/FGF2/TMEM102/GREM1/CD44/NEDD9/EGFR/CSPG4/EPHA5/…
GO:0030198	GO:0030198	extracellular matrix organization	310	0.53459	1.77898	0.00102041	0.0324345	0.0282278	5099	tags=38%, list=21%, signal=30%	FGB/VCAM1/HAS1/NPHS1/DMP1/ADAMTS4/VTN/PTX3/LAMA3/MMP1/MATN1/POSTN/COL19A1/ITGB6/THBS1/CTSS/BCL3/LAMB3/MMP3/MMP9/TNFRSF11B/LCP1/CRISPLD2/COL2A1/ITGA2/PDGFB/HAS2/VCAN/ITGA8/MMP13/ADAMTS9/MYH11/ITGB3/MMP10/COL9A3/COL15A1/COL6A3/ITGAD/LAMA4/COL1A2/DPP4/PECAM1/ETS1/COL22A1/A2M/NFKB2/LAMC2/ADTRP/ITGAM/NID2/NOXO1/ICAM1/TNFRSF1B/CHADL/FGF2/LOXL3/COL24A1/SPINT2/GREM1/PHLDB2/CD44/NPNT/FBLN2/TGFBI/COL13A1/L…
GO:0050900	GO:0050900	leukocyte migration	314	0.554081	1.84347	0.00102041	0.0324345	0.0282278	2873	tags=24%, list=12%, signal=21%	CXCR3/IL10/GPR183/CXCL6/CXCL8/IL1RN/VCAM1/CXCL10/CCL20/IL1B/ANGPT2/CXCL3/CCL2/CCL7/TNFSF14/CMKLR1/IL6/CNR2/CCR7/CXCL5/CCR1/TNFRSF18/FLT1/IL23A/C5AR2/PDE4D/LCK/S1PR1/ADGRE2/MMP1/MYO1G/CD74/IL36B/PDE4B/PTPN6/THBS1/MMP9/CCL4/KITLG/ITGA2/PDGFB/CCL3/SDC4/CD200R1/CXCL11/FOXJ1/ITGB3/PIK3CD/TREM1/S100A14/COL1A2/AZU1/PECAM1/CYP19A1/TBX21/PIK3CG/RAC2/OLR1/ADTRP/DOK2/VEGFC/ITGAM/SLC16A3/ICAM1/CXCL9/ZAP70/CX…
GO:0022407	GO:0022407	regulation of cell-cell adhesion	317	0.546038	1.81598	0.00102145	0.0324345	0.0282278	5425	tags=39%, list=23%, signal=31%	IL10/LILRB1/PLA2G2D/FGB/IL1RN/VCAM1/IFNG/IDO1/IGF1/IL23R/IL1B/WNT1/HAVCR2/FOXA1/CCL2/TNFSF14/IL6/BTLA/VNN1/CCR7/ALOX15/IL23A/LCK/MDGA1/CD74/PTPN6/IL12RB1/NR4A3/CD209/CD28/CD274/CD83/HAS2/IL7R/SDC4/FOXP3/RUNX3/FOXJ1/IL4R/NLRP3/ZC3H12A/DPP4/TBX21/ETS1/PRKCD/CD55/IL12B/ADTRP/CTLA4/CBFB/ICAM1/MBP/EFNB3/TNFRSF21/ZAP70/MYADM/LOXL3/SPINT2/ABAT/MIR222/BMP2/SNAI2/CD44/SPN/CDSN/MIR221/ADAM19/TGFBR2/BTN2A2/…
GO:0043900	GO:0043900	regulation of multi-organism process	322	0.483499	1.60821	0.00102145	0.0324345	0.0282278	2108	tags=13%, list=9%, signal=12%	IL10/CXCL6/LILRB1/CXCL8/MPO/IFNG/ASTL/BIRC3/IGF1/IL23R/AIM2/TRIM15/IQCF1/HAVCR2/PRF1/PTX3/POU2F3/IL23A/TNFAIP3/PDE3A/CD74/VIP/OASL/IL12RB1/TMPRSS2/PTGDR2/CCL4/CD28/TRIM10/PAEP/CCL3/HMGA2/NPPC/INHBB/BMP6/CD36/CFAP69/ZC3H12A/TRIB1/CD55/IL12B
GO:0051249	GO:0051249	regulation of lymphocyte activation	321	0.546132	1.81603	0.00102145	0.0324345	0.0282278	5355	tags=37%, list=22%, signal=29%	IL10/GPR183/LILRB1/PLA2G2D/VCAM1/IFNG/IDO1/SIT1/IGF1/IL23R/IL1B/HAVCR2/CCL2/TOX/TNFSF14/IL6/BTLA/VNN1/CCR7/MZB1/TBC1D10C/TNFRSF18/IL23A/TNFAIP3/LCK/TNFRSF4/CD74/PTPN6/PRDM1/IL12RB1/CD209/CD28/CD274/CD83/IL7R/SDC4/FOXP3/RUNX3/IRF4/FOXJ1/IL4R/NFATC2/NLRP3/ZC3H12A/DPP4/TBX21/CD55/RAC2/IL12B/CLCF1/CTLA4/ID2/CBFB/MPL/EFNB3/TNFRSF21/ZAP70/LOXL3/TAC1/IL27RA/INHBA/SPN/LAT/CHRNB2/MIR17HG/TGFBR2/BTN2A2/PDC…
GO:0002697	GO:0002697	regulation of immune effector process	302	0.492082	1.63312	0.00102249	0.0324345	0.0282278	4313	tags=24%, list=18%, signal=20%	IL10/CXCL6/LILRB1/IFNG/BIRC3/SH2D1B/IL23R/AIM2/IL1B/CPN2/TRIM15/HAVCR2/IL6/VTN/MZB1/IL23A/C5AR2/TNFAIP3/TNFRSF4/ADGRE2/CD74/PTPN6/IL12RB1/NR4A3/SERPINB4/CD28/SEMA7A/IL7R/FOXP3/IRF4/FOXJ1/IL4R/CD36/NLRP3/ZC3H12A/TBX21/RAET1E/A2M/CD55/RAC2/IL12B/CLCF1/ITGAM/RAET1E/LOXL3/IRAK3/IL27RA/NCR3/TRAF3/DDX21/IL18R1/CD59/TNF/NFKBIZ/PTPRC/CD22/TMEM173/IL4/BCR/PROKR1/FER/C4A/RASGRP1/CD177/SUSD4/LAG3/FCER1G/HTR…
GO:0045088	GO:0045088	regulation of innate immune response	299	0.514808	1.70706	0.00102249	0.0324345	0.0282278	2869	tags=17%, list=12%, signal=15%	OTOP1/TLR7/LILRB1/FGB/IFNG/MUC13/BIRC3/GBP5/SH2D1B/EREG/MUC2/AIM2/TRIM15/HAVCR2/NR1H4/ESR1/IRGM/NLRC3/DMBT1/TNFAIP3/S100A1/RELB/PTPN6/CTSS/SERPINB4/CD209/NR1D1/MUC16/MATR3/IRF4/MUC5AC/NFKB1/CD36/S100A14/RAET1E/MUC12/PRKCD/A2M/IL12B/SARM1/TLR10/ITGAM/TNIP3/MUC15/RAET1E/IKBKE/IRAK3/IRAK2/NCR3/TRAF3/MARCO
GO:0098542	GO:0098542	defense response to other organism	320	0.49715	1.65181	0.00102249	0.0324345	0.0282278	2933	tags=19%, list=12%, signal=17%	HIST1H2BG/IL10/TLR7/CXCL6/LILRB1/FGB/CXCL10/MPO/IFNG/CCL20/BIRC3/IL23R/AIM2/TRIM15/IFNE/HAVCR2/NR1H4/IRGM/HIST1H2BC/KLK3/RNASE7/CRP/HIST1H2BF/IL6/PRF1/DMBT1/HIST1H2BJ/IL23A/TNFAIP3/CD160/HIST1H2BK/SLFN11/OASL/IL12RB1/BCL3/HTN1/VGF/PRG2/IRF4/IL4R/CD36/HRG/S100A14/NLRP3/AZU1/ZC3H12A/PRKCD/IL12B/IFI44L/CXCL9/BATF2/H2BFS/HTN3/GBP1/IL27RA/CHGA/HIST2H2BE/TRAF3/SPN/SSC5D
GO:0002250	GO:0002250	adaptive immune response	282	0.575926	1.90477	0.00102354	0.0324345	0.0282278	4318	tags=30%, list=18%, signal=25%	IL10/GPR183/LILRB1/GAPT/FGB/IFNG/SH2D1B/SIT1/SEMA4A/IL1RL1/IL23R/IL1B/IFNE/HAVCR2/KLHL6/CRP/IL6/BTLA/PRF1/POU2F2/ALOX15/IL23A/TNFAIP3/MYO1G/CD74/TEC/RELB/PTPN6/PRDM1/CTSS/IL12RB1/BCL3/CD209/CD28/CD274/IL7R/FOXP3/IRF4/FOXJ1/PIK3CD/IL4R/NLRP3/ZC3H12A/RORC/TBX21/RAET1E/PIK3CG/PRKCD/NFKB2/CD55/IL12B/CLCF1/CTLA4/BTNL8/ICAM1/TNFRSF21/ZAP70/RAET1E/LOXL3/IL27RA/SPN/IL18R1/LAT/TNF/NFKBIZ/PTPRC/IRF1/ITK/IL…
GO:0007599	GO:0007599	hemostasis	276	0.501342	1.65711	0.00102354	0.0324345	0.0282278	5511	tags=33%, list=23%, signal=26%	SERPINB2/FGB/SERPIND1/FLI1/TRPC7/F2RL3/TFPI2/LCP2/F13B/IL6/F3/CYP4F2/PLEK/VTN/LCK/PROC/PLAU/TEC/PTPN6/THBS1/HIST1H3A/ITGA2/PDGFB/SH2B3/THBD/ADRA2B/HIST1H3H/P2RX1/MAFF/DGKI/CYP4F11/ITGB3/PIK3CD/PLAUR/CD36/HRG/COL1A2/HIST1H3B/PIK3CG/GNA15/PRKCD/A2M/EHD1/ADTRP/MPL/H3F3B/ABAT/TRPC6/PRKAR1B/CD59/RCOR1/PEAR1/SERPINE1/FERMT3/IRF1/DGKD/VCL/CD177/SERPINA1/FCER1G/BLOC1S4/PLAT/ACTG1/ZFPM2/SCUBE1/CDC42/SAA1/…
GO:0008544	GO:0008544	epidermis development	276	0.494797	1.63548	0.00102354	0.0324345	0.0282278	4655	tags=32%, list=19%, signal=26%	KRTAP13-2/DKK1/KRT23/KRT39/KRT20/EREG/KRT6A/KRT4/KRT33A/KRT73/KRT12/KRT78/LIPK/LOR/DCT/AQP3/POU2F3/KRT79/KRTDAP/LAMA3/PRR9/KRT34/KRTAP2-3/SPRR2D/KRT33B/KLK13/TP63/LAMB3/ERRFI1/TGM3/KRT5/KRT75/TMC1/SCEL/PTHLH/DSP/KRT17/KRTAP5-9/KRT9/MAFF/STRC/IVL/CDH3/KRT71/EMP1/LAMC2/PPARD/CBFB/ST14/SPINK6/IRF6/WNT10A/OVOL2/KRT7/FST/WHRN/INHBA/EGFR/CDSN/SNAI1/CST6/KRT18/TNF/USH2A/CTGF/POU4F3/EVPL/KRT15/KRT19/BNC1…
GO:0042692	GO:0042692	muscle cell differentiation	297	0.452666	1.50002	0.00102354	0.0324345	0.0282278	5131	tags=32%, list=21%, signal=25%	CXCL10/DKK1/EREG/RGS4/IGF1/MYPN/WNT1/TRIM72/RGS2/TNFSF14/NPHS1/SMYD1/TBX1/BHLHA15/ACTC1/ALPK3/SLC8A1/TTN/MYBPC2/DMD/CD53/PDGFB/ITGA8/TBX3/MYH11/NRG1/IL4R/NFATC2/SYNE1/CDH15/FLNC/NRAP/ADM/EHD1/SIK1/KDM6B/H3F3B/CXCL9/TRIM54/PDGFRB/KCNH1/GREM1/MIR222/BMP2/NPNT/MYH3/MIR221/FER1L5/TPM1/DNER/KRT19/WT1/BIN3/MYOM2/TMOD1/RBM24/EFNB2/ZEB1/BARX2/FLT3LG/MYH6/FAM129B/NEB/PDLIM5/OLFM2/MSX1/ADAM12/ACTN2/MYOZ1/R…
GO:1901342	GO:1901342	regulation of vasculature development	283	0.476793	1.57676	0.00102354	0.0324345	0.0282278	3712	tags=24%, list=15%, signal=21%	IL10/CXCL8/CXCL10/FASLG/ANGPTL4/SEMA4A/IL1B/ANGPT2/EPHA1/TIE1/KLK3/IL6/F3/FLT1/TNFAIP3/LRG1/S100A1/FOXC2/APLNR/THBS1/THBS2/MMRN2/PDGFB/GHRL/SPHK1/HMGA2/NRP1/ADAMTS9/ASB4/FGF1/NFATC2/HRG/PTGIS/BTG1/ZC3H12A/ETS1/ADM/GPR4/HGF/NGFR/CDH5/TNFRSF12A/VEGFC/CYBB/MINAR1/CX3CR1/FGF2/SPRY2/GREM1/ID1/MIR222/XDH/MIR153-1/AGO2/MIR221/DLL4/TGFBR2/CARD10/FGF18/JCAD/EPN2/SERPINE1/HK2/WT1/RHOB/PLXND1/HYAL1/RUNX1/EF…
GO:0046677	GO:0046677	response to antibiotic	274	0.459023	1.51733	0.00102459	0.0324345	0.0282278	3851	tags=20%, list=16%, signal=17%	CSF3/IL10/VCAM1/CCR4/RGS4/CCL7/RGS2/GRIN2A/IL6/AREG/TH/TNFAIP3/ACTC1/CYP1A1/ND6/NR4A3/SLC8A1/PDGFB/FOXO1/SLC2A4/NPPC/ID3/FOSL1/MAOB/MB/KCNMB1/ZC3H12A/ETS1/PRKCD/CDO1/HGF/KDM6B/ICAM1/CYBB/PDGFRB/CLDN1/ABAT/ID1/TRPC6/CYP2E1/ALPL/KPNA4/CHRNB2/DRD4/PPIF/ADCY2/TNC/MAPK13/RHOB/MET/HYAL1/BAK1/AOC3/CIITA/DRD2
GO:0002696	GO:0002696	positive regulation of leukocyte activation	245	0.555587	1.82305	0.00102775	0.0324345	0.0282278	5355	tags=37%, list=22%, signal=29%	IL10/GPR183/LILRB1/VCAM1/IFNG/IL1RL1/IGF1/IL23R/IL1B/HAVCR2/CCL2/TOX/TNFSF14/IL6/BTLA/VNN1/CCR7/IL23A/LCK/TNFRSF4/CD74/PTPN6/THBS1/TTBK1/IL12RB1/NR4A3/CD209/CD28/CD274/CD83/IL7R/FOXP3/RUNX3/IL4R/NFATC2/NLRP3/DPP4/TBX21/CD55/IL12B/CLCF1/CTLA4/CBFB/ITGAM/MPL/EFNB3/ZAP70/TAC1/FAM19A3/CHRNB2/TGFBR2/BTN2A2/PDCD1/NFKBIZ/PTPRC/CORO1A/RUNX1/IL6R/IL4/EFNB2/FLT3LG/CD276/GRAP2/RASGRP1/CD177/FCER1G/ICOS/JAK3…
GO:0050727	GO:0050727	regulation of inflammatory response	269	0.543512	1.79585	0.00102775	0.0324345	0.0282278	3919	tags=28%, list=16%, signal=24%	IL10/SUCNR1/TLR7/IDO1/BIRC3/GBP5/NT5E/IL1RL1/IL1B/CPN2/NR1H4/ESR1/IL6/CNR2/NLRC3/VTN/CCR7/OSM/FABP4/IL23A/C5AR2/TNFAIP3/TGM2/PROC/MEFV/WFDC1/TTBK1/MMP3/MMP9/CD28/ITGA2/SEMA7A/GHRL/CCL3/FOXP3/CD200R1/NFKB1/PTGIS/NLRP3/GPR17/ZC3H12A/CYP19A1/ETS1/PIK3CG/PRKCD/A2M/CD55/IL12B/HGF/CDH5/TLR10/PPARD/ITGAM/TNFRSF1B/IL1R2/MIR222/TAC1/FAM19A3/TNFAIP6/EGFR/MIR221/CD59/TNF/FOXP1/ACP5/ZYX/NFKBIZ/MAPK13/SERPINE…
GO:0050817	GO:0050817	coagulation	273	0.494253	1.63239	0.00102775	0.0324345	0.0282278	5511	tags=33%, list=23%, signal=26%	SERPINB2/FGB/SERPIND1/TRPC7/F2RL3/TFPI2/LCP2/F13B/IL6/F3/CYP4F2/PLEK/VTN/LCK/PROC/PLAU/TEC/PTPN6/THBS1/HIST1H3A/ITGA2/PDGFB/SH2B3/THBD/ADRA2B/HIST1H3H/P2RX1/MAFF/DGKI/CYP4F11/ITGB3/PIK3CD/PLAUR/CD36/HRG/COL1A2/HIST1H3B/PIK3CG/GNA15/PRKCD/A2M/EHD1/ADTRP/MPL/H3F3B/ABAT/TRPC6/PRKAR1B/CD59/RCOR1/PEAR1/SERPINE1/FERMT3/IRF1/DGKD/VCL/CD177/SERPINA1/FCER1G/BLOC1S4/PLAT/ACTG1/ZFPM2/SCUBE1/CDC42/SAA1/GP5/P…
GO:0002237	GO:0002237	response to molecule of bacterial origin	268	0.603657	1.99412	0.00102881	0.0324345	0.0282278	2737	tags=24%, list=11%, signal=22%	CSF3/IL10/CXCL6/LILRB1/CXCL8/IL1RN/VCAM1/CXCL10/MPO/FASLG/IDO1/CSF2/IL24/IL23R/IL1B/HAVCR2/NR1H4/IRGM/CXCL3/CCL2/IL6/CNR2/CCR7/CXCL5/TH/PDE4D/TNFAIP3/PTGER1/CSF2RB/NUGGC/REN/IL36B/PDE4B/CYP1A1/NR1D1/CD274/CCL3/THBD/CXCL11/BMP6/JUNB/PTGIR/NFKB1/MAOB/CD36/S100A14/NLRP3/WDR35/ZC3H12A/TRIB1/ADM/NFKB2/CD55/IL12B/PPARD/ICAM1/TNFRSF1B/TIMP4/TNIP3/CXCL9/CX3CR1/IRAK3/CLDN1/TAC1/IRAK2
GO:0051480	GO:0051480	regulation of cytosolic calcium ion concentration	268	0.504467	1.66646	0.00102881	0.0324345	0.0282278	3058	tags=24%, list=13%, signal=21%	LPAR6/CXCR3/GPR32/CXCL10/CCR4/FASLG/TRPC7/F2RL3/CHRNA9/CEMIP/ESR1/GPR65/CMKLR1/GRIN2A/P2RY6/CCR7/CCR1/CCRL2/TRPC4/C5AR2/PDE4D/LCK/S1PR1/PTGER1/NTSR1/TGM2/CALB1/PTPN6/APLNR/BDKRB2/MCHR1/SLC8A1/TACR1/TRPV6/CALCR/DMD/GHRL/CCL3/CXCL11/P2RX1/CNGB1/PTGIR/CD36/GPR17/ATP2B2/RASA3/GRIN2D/ADM/PIK3CG/GPR4/GNA15/GIPR/CD55/GPR55/CXCL9/CX3CR1/FGF2/TRPC6/TAC1/KCNK3/KISS1/TSPOAP1/CD52/ATP2B1
GO:0070372	GO:0070372	regulation of ERK1 and ERK2 cascade	250	0.48244	1.58636	0.00102881	0.0324345	0.0282278	3924	tags=27%, list=16%, signal=23%	GPR183/FGB/CCL20/NTRK1/CHRNA9/IL1B/INSRR/DUSP4/HAVCR2/EPHA1/TIE1/CCL2/CCL7/P2RY6/CCR7/ALOX15/CCR1/TBC1D10C/FLT1/C5AR2/CSF1R/CD74/PTPN6/SPRY4/EPHA4/CCL4/ERRFI1/CALCR/SEMA7A/PDGFB/CCL3/NRP1/MST1R/CD36/LIF/GPR55/IGF1R/ICAM1/FGF4/PDGFRB/FGF2/SPRY2/MIR222/GBP1/BMP2/CD44/NPNT/PTPRR/EGFR/MARCO/EPHA5/MIR221/NTRK2/ROS1/EZR/BTN2A2/FGF18/TNF/FN1/ARHGAP8/CTGF/PTPRC/EPHB6/MET/PDGFC/CAMK2N1/DRD2/RASGRP1
GO:0002768	GO:0002768	immune response-regulating cell surface receptor signaling pathway	263	0.481227	1.58456	0.00102987	0.0324345	0.0282278	4352	tags=25%, list=18%, signal=21%	GPR32/LILRB1/MUC13/MUC2/KLHL6/LCP2/CMKLR1/BTLA/CCR7/C5AR2/PDE4D/CACNA1F/LCK/MYO1G/FYB1/TEC/RELB/PDE4B/PTPN6/NR4A3/CD209/MUC16/CD28/FOXP3/CD200R1/MUC5AC/PIK3CD/NFKB1/NFATC2/PIGR/ZC3H12A/MUC12/PRKCD/CTLA4/BTNL8/CBFB/MUC15/TNFRSF21/ZAP70/GBP1/NCR3/LIMK1/LAT/EZR/BTN2A2/NFKBIZ/PTPRC/MYO10/CD22/MUC19/GCSAML/ITK/RUNX1/SKAP1/FER/CD276/GRAP2/KCNN4/ERMAP/FCER1G/LPXN/ACTG1/PTPN22/CD3D/CDC42/CARD11/BLK
GO:0007596	GO:0007596	blood coagulation	271	0.495504	1.63697	0.00102987	0.0324345	0.0282278	5511	tags=34%, list=23%, signal=26%	SERPINB2/FGB/SERPIND1/TRPC7/F2RL3/TFPI2/LCP2/F13B/IL6/F3/CYP4F2/PLEK/VTN/LCK/PROC/PLAU/TEC/PTPN6/THBS1/HIST1H3A/ITGA2/PDGFB/SH2B3/THBD/ADRA2B/HIST1H3H/P2RX1/MAFF/DGKI/CYP4F11/ITGB3/PIK3CD/PLAUR/CD36/HRG/COL1A2/HIST1H3B/PIK3CG/GNA15/PRKCD/A2M/EHD1/ADTRP/MPL/H3F3B/ABAT/TRPC6/PRKAR1B/CD59/RCOR1/PEAR1/SERPINE1/FERMT3/IRF1/DGKD/VCL/CD177/SERPINA1/FCER1G/BLOC1S4/PLAT/ACTG1/ZFPM2/SCUBE1/CDC42/SAA1/GP5/P…
GO:0032496	GO:0032496	response to lipopolysaccharide	258	0.615411	2.02262	0.00103093	0.0324345	0.0282278	2737	tags=25%, list=11%, signal=23%	CSF3/IL10/CXCL6/LILRB1/CXCL8/IL1RN/VCAM1/CXCL10/MPO/FASLG/IDO1/CSF2/IL24/IL23R/IL1B/HAVCR2/NR1H4/IRGM/CXCL3/CCL2/IL6/CNR2/CCR7/CXCL5/TH/PDE4D/TNFAIP3/PTGER1/CSF2RB/NUGGC/REN/IL36B/PDE4B/CYP1A1/NR1D1/CD274/CCL3/THBD/CXCL11/BMP6/JUNB/PTGIR/NFKB1/MAOB/CD36/S100A14/NLRP3/WDR35/ZC3H12A/TRIB1/ADM/NFKB2/CD55/IL12B/PPARD/ICAM1/TNFRSF1B/TIMP4/TNIP3/CXCL9/CX3CR1/IRAK3/CLDN1/TAC1/IRAK2
GO:0045765	GO:0045765	regulation of angiogenesis	255	0.487612	1.60344	0.00103093	0.0324345	0.0282278	3651	tags=24%, list=15%, signal=21%	IL10/CXCL8/CXCL10/FASLG/ANGPTL4/SEMA4A/IL1B/ANGPT2/EPHA1/TIE1/KLK3/IL6/F3/FLT1/TNFAIP3/LRG1/S100A1/FOXC2/APLNR/THBS1/THBS2/MMRN2/GHRL/SPHK1/HMGA2/NRP1/ADAMTS9/FGF1/HRG/PTGIS/BTG1/ZC3H12A/ETS1/ADM/GPR4/HGF/NGFR/CDH5/TNFRSF12A/VEGFC/CYBB/MINAR1/CX3CR1/FGF2/SPRY2/GREM1/ID1/MIR222/AGO2/MIR221/DLL4/TGFBR2/CARD10/FGF18/JCAD/EPN2/SERPINE1/HK2/RHOB/PLXND1/HYAL1/RUNX1
GO:0007159	GO:0007159	leukocyte cell-cell adhesion	257	0.556443	1.82908	0.00103199	0.0324345	0.0282278	5376	tags=40%, list=22%, signal=31%	IL10/LILRB1/PLA2G2D/VCAM1/IFNG/IDO1/NT5E/IGF1/IL23R/IL1B/HAVCR2/CCL2/TNFSF14/IL6/BTLA/VNN1/CCR7/IL23A/LCK/CD74/PTPN6/IL12RB1/NR4A3/CD209/CD28/CD274/CD83/HAS2/IL7R/SDC4/FOXP3/RUNX3/FOXJ1/IL4R/NLRP3/ZC3H12A/DPP4/PECAM1/TBX21/ETS1/CD55/RAC2/IL12B/ADTRP/CTLA4/CBFB/ICAM1/EFNB3/TNFRSF21/ZAP70/CX3CR1/LOXL3/MIR222/CD44/SPN/MIR221/TGFBR2/EZR/BTN2A2/PDCD1/TNF/NFKBIZ/PTPRC/FERMT3/IRF1/CORO1A/RUNX1/IL6R/IL4/…
GO:0030098	GO:0030098	lymphocyte differentiation	260	0.575166	1.88968	0.00103199	0.0324345	0.0282278	4325	tags=32%, list=18%, signal=27%	IL10/GPR183/PLA2G2D/VCAM1/IFNG/LYL1/NTRK1/SEMA4A/IL11/IL23R/WNT1/IFNE/TOX/IL6/VNN1/CCR7/POU2F2/TNFRSF18/IL23A/LCK/RHOH/TCF7/CD74/RELB/PTPN6/PRDM1/IL12RB1/BCL3/CD28/CD83/IL7R/FOXP3/RUNX3/IRF4/FOXJ1/PIK3CD/MAFB/IL4R/NFATC2/NLRP3/ZC3H12A/RORC/TBX21/IL12B/PKNOX1/CLCF1/LFNG/CTLA4/ID2/CBFB/FZD8/ZAP70/LOXL3/INHBA/SPN/IL18R1/DLL4/MIR17HG/DOCK10/TGFBR2/BTN2A2/FOXP1/SOX13/NFKBIZ/PTPRC/MFNG/IRF1/KLF6/ITK/RU…
GO:0032102	GO:0032102	negative regulation of response to external stimulus	256	0.504133	1.65733	0.00103199	0.0324345	0.0282278	3919	tags=26%, list=16%, signal=22%	SERPINB2/IL10/FGB/NT5E/SEMA4A/EPPK1/ANGPT2/HAVCR2/NR1H4/CCL2/CNR2/NLRC3/VTN/C5AR2/TNFAIP3/PROC/PLAU/SEMA3A/MEFV/THBS1/WFDC1/EPHA4/SEMA7A/PDGFB/GHRL/THBD/FOXP3/NRP1/CD200R1/PLAUR/NFKB1/HRG/PTGIS/NLRP3/GPR17/ZC3H12A/CYP19A1/TRIB1/ETS1/PRKCD/IL12B/HGF/ADTRP/CDH5/PPARD/TNFRSF1B/IL1R2/FGF2/GREM1/ABAT/PHLDB2/MIR222/SNAI2/FAM19A3/TNFAIP6/MIR221/ACP5/SEMA3C/SERPINE1/PTPRC/SLIT2/SEMA5B/SMAD3/METRNL/BCR/DR…
GO:0050867	GO:0050867	positive regulation of cell activation	253	0.556587	1.83	0.00103199	0.0324345	0.0282278	5355	tags=38%, list=22%, signal=30%	IL10/GPR183/LILRB1/VCAM1/IFNG/IL1RL1/IGF1/IL23R/IL1B/HAVCR2/CCL2/TOX/TNFSF14/IL6/PLEK/BTLA/VNN1/CCR7/IL23A/LCK/TNFRSF4/CD74/PTPN6/THBS1/TTBK1/IL12RB1/NR4A3/CD209/CD28/CD274/CD83/IL7R/FOXP3/RUNX3/IL4R/NFATC2/NLRP3/DPP4/TBX21/CD55/IL12B/CLCF1/CTLA4/CBFB/ITGAM/MPL/EFNB3/ZAP70/PDGFRB/TAC1/FAM19A3/SOX15/CHRNB2/TGFBR2/BTN2A2/PDCD1/CTGF/NFKBIZ/PTPRC/CORO1A/RUNX1/IL6R/IL4/EFNB2/FLT3LG/CD276/GRAP2/RASGRP1…
GO:0070371	GO:0070371	ERK1 and ERK2 cascade	265	0.478202	1.57663	0.00103199	0.0324345	0.0282278	3924	tags=26%, list=16%, signal=22%	GPR183/FGB/CCL20/NTRK1/CHRNA9/IGF1/IL1B/INSRR/DUSP4/HAVCR2/EPHA1/TIE1/CCL2/CCL7/P2RY6/CCR7/ALOX15/CCR1/TBC1D10C/FLT1/C5AR2/CSF1R/CD74/PTPN6/SPRY4/EPHA4/CCL4/ERRFI1/CALCR/SEMA7A/PDGFB/CCL3/NRP1/MST1R/CD36/LIF/GPR55/IGF1R/ICAM1/FGF4/PDGFRB/FGF2/SPRY2/MIR222/GBP1/BMP2/CD44/NPNT/MYC/PTPRR/EGFR/MARCO/EPHA5/MIR221/NTRK2/ROS1/EZR/BTN2A2/FGF18/TNF/FN1/ARHGAP8/CTGF/PTPRC/EPHB6/MET/PDGFC/CAMK2N1/DRD2/RASGR…
GO:0045089	GO:0045089	positive regulation of innate immune response	252	0.500953	1.6466	0.00103306	0.0324345	0.0282278	2869	tags=17%, list=12%, signal=16%	TLR7/FGB/MUC13/BIRC3/GBP5/SH2D1B/EREG/MUC2/AIM2/TRIM15/HAVCR2/NR1H4/ESR1/IRGM/DMBT1/TNFAIP3/S100A1/RELB/CTSS/CD209/NR1D1/MUC16/MATR3/IRF4/MUC5AC/NFKB1/CD36/S100A14/RAET1E/MUC12/PRKCD/IL12B/SARM1/TLR10/ITGAM/TNIP3/MUC15/RAET1E/IKBKE/IRAK3/IRAK2/NCR3/TRAF3/MARCO
GO:0002429	GO:0002429	immune response-activating cell surface receptor signaling pathway	242	0.469086	1.53492	0.00103413	0.0324345	0.0282278	4352	tags=26%, list=18%, signal=21%	GPR32/MUC13/MUC2/KLHL6/LCP2/CMKLR1/CCR7/C5AR2/PDE4D/CACNA1F/LCK/MYO1G/FYB1/TEC/RELB/PDE4B/PTPN6/NR4A3/CD209/MUC16/CD28/FOXP3/MUC5AC/PIK3CD/NFKB1/NFATC2/ZC3H12A/MUC12/PRKCD/CTLA4/BTNL8/CBFB/MUC15/TNFRSF21/ZAP70/GBP1/NCR3/LIMK1/LAT/EZR/BTN2A2/NFKBIZ/PTPRC/MYO10/CD22/MUC19/GCSAML/ITK/RUNX1/SKAP1/CD276/GRAP2/KCNN4/ERMAP/FCER1G/LPXN/ACTG1/PTPN22/CD3D/CDC42/CARD11/BLK
GO:0050863	GO:0050863	regulation of T cell activation	242	0.564997	1.84875	0.00103413	0.0324345	0.0282278	4983	tags=36%, list=21%, signal=29%	IL10/LILRB1/PLA2G2D/VCAM1/IFNG/IDO1/SIT1/IGF1/IL23R/IL1B/HAVCR2/CCL2/TNFSF14/IL6/BTLA/VNN1/CCR7/TNFRSF18/IL23A/LCK/CD74/PTPN6/PRDM1/IL12RB1/CD209/CD28/CD274/CD83/IL7R/SDC4/FOXP3/RUNX3/IRF4/FOXJ1/IL4R/NFATC2/NLRP3/ZC3H12A/DPP4/TBX21/CD55/RAC2/IL12B/CTLA4/CBFB/EFNB3/TNFRSF21/ZAP70/LOXL3/SPN/LAT/TGFBR2/BTN2A2/PDCD1/SOX13/NFKBIZ/PTPRC/IRF1/CORO1A/RUNX1/IL6R/IL4/EFNB2/ZEB1/SH3RF1/CD276/GRAP2/RASGRP1/L…
GO:0007204	GO:0007204	positive regulation of cytosolic calcium ion concentration	235	0.506571	1.65146	0.00103734	0.0324345	0.0282278	2151	tags=20%, list=9%, signal=19%	LPAR6/CXCR3/GPR32/CXCL10/CCR4/FASLG/F2RL3/CHRNA9/CEMIP/ESR1/GPR65/CMKLR1/GRIN2A/P2RY6/CCR7/CCR1/CCRL2/C5AR2/PDE4D/LCK/S1PR1/PTGER1/NTSR1/TGM2/PTPN6/APLNR/BDKRB2/MCHR1/SLC8A1/TACR1/TRPV6/CALCR/DMD/GHRL/CCL3/CXCL11/PTGIR/CD36/GPR17/RASA3/GRIN2D/ADM/PIK3CG/GPR4/GNA15/GIPR/CD55/GPR55
GO:0046651	GO:0046651	lymphocyte proliferation	197	0.563805	1.82716	0.00103842	0.0324345	0.0282278	3889	tags=28%, list=16%, signal=24%	IL10/GPR183/LILRB1/PLA2G2D/GAPT/VCAM1/IDO1/IGF1/IL23R/IL1B/IFNE/HAVCR2/TNFSF14/IL6/MZB1/IL23A/MS4A1/TNFRSF4/CD74/PTPN6/IL12RB1/CD209/CD28/CD274/IL7R/SDC4/FOXP3/FOXJ1/NFATC2/CTPS1/PIK3CG/PRKCD/CD55/RAC2/IL12B/CLCF1/CTLA4/MPL/TNFRSF21/ZAP70/TAC1/SPN/CHRNB2/TGFBR2/BTN2A2/PTPRC/IRF1/CD22/CORO1A/IL6R/IL4/FLT3LG/SH3RF1/CD276/GAL
GO:0002460	GO:0002460	adaptive immune response based on somatic recombination of immune receptors built from immunoglobulin superfamily domains	200	0.571321	1.85304	0.0010395	0.0324345	0.0282278	4287	tags=30%, list=18%, signal=24%	IL10/LILRB1/GAPT/SEMA4A/IL1RL1/IL23R/IL1B/HAVCR2/KLHL6/CRP/IL6/PRF1/POU2F2/IL23A/TNFAIP3/MYO1G/CD74/RELB/PTPN6/IL12RB1/BCL3/CD28/CD274/IL7R/FOXP3/IRF4/FOXJ1/IL4R/NLRP3/ZC3H12A/RORC/TBX21/RAET1E/PRKCD/NFKB2/CD55/IL12B/CLCF1/ICAM1/RAET1E/LOXL3/IL27RA/SPN/IL18R1/TNF/NFKBIZ/PTPRC/IL6R/IL4/PROKR1/C4A/SUSD4/SCART1/LEF1/FCER1G/JAG1/ERCC1/JAK3/NLRP10
GO:0022409	GO:0022409	positive regulation of cell-cell adhesion	203	0.59186	1.92023	0.0010395	0.0324345	0.0282278	5066	tags=40%, list=21%, signal=32%	IL10/LILRB1/FGB/VCAM1/IFNG/IGF1/IL23R/IL1B/HAVCR2/FOXA1/CCL2/TNFSF14/IL6/BTLA/VNN1/CCR7/ALOX15/IL23A/LCK/CD74/PTPN6/IL12RB1/NR4A3/CD209/CD28/CD274/CD83/HAS2/IL7R/FOXP3/RUNX3/IL4R/NLRP3/DPP4/ETS1/CD55/IL12B/CTLA4/CBFB/ICAM1/EFNB3/ZAP70/CD44/ADAM19/TGFBR2/BTN2A2/PDCD1/TNF/NFKBIZ/PTPRC/MYO10/CORO1A/ITGA6/RUNX1/IL6R/IL4/EFNB2/SKAP1/CD276/GRAP2/RASGRP1/PODXL/ICOS/JAK3/SIRPB1/CDC42/CARD11/BCL10/RARA/SE…
GO:0032103	GO:0032103	positive regulation of response to external stimulus	232	0.561655	1.82832	0.0010395	0.0324345	0.0282278	3673	tags=28%, list=15%, signal=24%	SUCNR1/TLR7/CXCL8/CXCL10/CCR4/IDO1/GBP5/IL1RL1/IL1B/TRIM15/HAVCR2/CCL7/TNFSF14/CMKLR1/IL6/F3/CCR7/CCR1/SCARF1/OSM/FABP4/IL23A/S1PR1/TGM2/CD74/THBS1/TTBK1/CCL4/CD28/ITGA2/PDGFB/GHRL/CCL3/THBD/NRP1/BMP6/HRG/S100A14/AZU1/ETS1/PIK3CG/RAC2/IL12B/TLR10/VEGFC/ITGAM/PDGFRB/FGF2/TMEM102/MIR222/TAC1/BMPR2/FAM19A3/EGFR/MIR221/FGF18/TNF/NFKBIZ/MAPK13/CNTF/SERPINE1/SLIT2/SMAD3/MET/IL6R
GO:0043588	GO:0043588	skin development	238	0.522817	1.70607	0.0010395	0.0324345	0.0282278	4655	tags=33%, list=19%, signal=27%	KRTAP13-2/DKK1/KRT23/KRT39/KRT20/EREG/KRT6A/KRT4/KRT33A/KRT73/KRT12/KRT78/LIPK/LOR/AQP3/KRT79/PRR9/KRT34/KRTAP2-3/SPRR2D/KRT33B/KLK13/TP63/ERRFI1/ITGA2/TGM3/KRT5/KRT75/SCEL/DSP/KRT17/KRTAP5-9/KRT9/IVL/CDH3/KRT71/COL1A2/CBFB/ST14/SPINK6/IRF6/WNT10A/OVOL2/LTB/CLDN1/KRT7/FST/INHBA/EGFR/CDSN/SNAI1/GJB3/KRT18/TNF/EVPL/KRT15/KRT19/ITGA6/COL5A3/MET/RUNX1/KRT86/GAL/FOXC1/ATP8A2/ZFP36L1/JAG1/KLK5/ITGA3/KR…
GO:0070661	GO:0070661	leukocyte proliferation	207	0.569412	1.84738	0.0010395	0.0324345	0.0282278	3889	tags=29%, list=16%, signal=24%	IL10/GPR183/LILRB1/PLA2G2D/GAPT/VCAM1/IDO1/IGF1/IL23R/IL1B/IFNE/HAVCR2/NPR3/TNFSF14/IL6/MZB1/IL23A/MS4A1/TNFAIP3/TNFRSF4/CD74/PTPN6/IL12RB1/CD209/CD28/KITLG/CD274/IL7R/SDC4/FOXP3/FOXJ1/NFATC2/CTPS1/PIK3CG/PRKCD/CD55/RAC2/IL12B/CLCF1/CTLA4/MPL/TNFRSF21/ZAP70/GREM1/TAC1/SPN/CHRNB2/TGFBR2/BTN2A2/PTPRC/IRF1/CD22/CORO1A/IL6R/IL4/FLT3LG/SH3RF1/CD276/GAL
GO:0002218	GO:0002218	activation of innate immune response	205	0.505804	1.64071	0.00104058	0.0324345	0.0282278	2869	tags=18%, list=12%, signal=16%	TLR7/FGB/MUC13/BIRC3/MUC2/AIM2/TRIM15/HAVCR2/NR1H4/ESR1/IRGM/DMBT1/TNFAIP3/S100A1/RELB/CTSS/CD209/NR1D1/MUC16/MATR3/IRF4/MUC5AC/NFKB1/CD36/S100A14/MUC12/PRKCD/SARM1/TLR10/ITGAM/TNIP3/MUC15/IKBKE/IRAK3/IRAK2/TRAF3/MARCO
GO:0032943	GO:0032943	mononuclear cell proliferation	199	0.559989	1.81438	0.00104058	0.0324345	0.0282278	3889	tags=28%, list=16%, signal=23%	IL10/GPR183/LILRB1/PLA2G2D/GAPT/VCAM1/IDO1/IGF1/IL23R/IL1B/IFNE/HAVCR2/TNFSF14/IL6/MZB1/IL23A/MS4A1/TNFRSF4/CD74/PTPN6/IL12RB1/CD209/CD28/CD274/IL7R/SDC4/FOXP3/FOXJ1/NFATC2/CTPS1/PIK3CG/PRKCD/CD55/RAC2/IL12B/CLCF1/CTLA4/MPL/TNFRSF21/ZAP70/TAC1/SPN/CHRNB2/TGFBR2/BTN2A2/PTPRC/IRF1/CD22/CORO1A/IL6R/IL4/FLT3LG/SH3RF1/CD276/GAL
GO:0050730	GO:0050730	regulation of peptidyl-tyrosine phosphorylation	204	0.528219	1.71298	0.00104058	0.0324345	0.0282278	3919	tags=30%, list=16%, signal=26%	CSF3/IFNG/CSF2/EREG/RELN/IL24/IGF1/IL11/IL23R/EPGN/IL6/DOK7/AREG/VTN/OSM/TNFRSF18/IL23A/CSF1R/TGFA/CASS4/CD74/TEC/PTPN6/EPHA4/ERRFI1/KITLG/PDGFB/GHRL/HBEGF/NRP1/PTK6/NRG1/ITGB3/CD36/HRG/LIF/PECAM1/PRKCD/IL12B/CLCF1/HGF/ICAM1/NEURL1/TMEM102/GREM1/CD44/NEDD9/EGFR/CSPG4/MIR221/NTRK2/DLG3/SH3BP5L/CNTF/PTPRC/EHD4/IL6R/IL4/PDGFC/CRLF1/TAL1/TNFRSF1A
GO:2001234	GO:2001234	negative regulation of apoptotic signaling pathway	202	0.470165	1.52559	0.00104058	0.0324345	0.0282278	3648	tags=17%, list=15%, signal=15%	FGB/GDNF/FASLG/CSF2/BCL2A1/IGF1/IL1B/MPV17L/VNN1/TNFAIP3/TNFRSF4/CD74/THBS1/BDKRB2/MMP9/COL2A1/NRP1/PLAUR/NR4A2/HERPUD1/HGF/MAPK8IP2/ICAM1/CX3CR1/MIR222/SNAI2/CD44/SNAI1/MCL1/MIR221/PPIF/TNF/SERPINE1/ITGA6/PAM16
GO:0001818	GO:0001818	negative regulation of cytokine production	211	0.514855	1.66676	0.00104275	0.0324345	0.0282278	3464	tags=25%, list=14%, signal=22%	IL10/LILRB1/IFNG/IDO1/IL1RL1/IL23R/HAVCR2/NR1H4/CMKLR1/IL6/NLRC3/IL23A/C5AR2/TNFAIP3/TNFRSF4/RELB/PTPN6/MEFV/THBS1/BCL3/ERRFI1/CD274/CD83/GHRL/FOXP3/CD200R1/FOXJ1/INHBB/NFKB1/CDH3/NLRP3/NAV3/ZC3H12A/TBX21/IL12B/HGF/TNFRSF21/IL1R2/CX3CR1/IKBKE/IRAK3/MIR222/GBP1/INHBA/SSC5D/MIR221/EZR/BTN2A2/TNF/RNF128/FN1/ACP5/PTPRC
GO:0034612	GO:0034612	response to tumor necrosis factor	209	0.54279	1.75787	0.00104275	0.0324345	0.0282278	2829	tags=21%, list=12%, signal=18%	DCSTAMP/CXCL8/VCAM1/CCL20/BIRC3/TRAF1/AIM2/NR1H4/CCL2/CCL7/TNFSF14/CARD14/TNFSF15/HIST1H2BJ/TNFRSF18/FABP4/TNFAIP3/TNFRSF4/POSTN/CCL4/TNFRSF11B/TNFRSF8/SLC2A4/SPHK1/CCL3/HAS2/EDARADD/NFKB1/GPD1/WDR35/TNFRSF9/ZC3H12A/TNFRSF12A/ICAM1/TNFRSF1B/AFF3/TNFRSF21/LTB/CLDN1/GBP1/ST18/NPNT/TRAF3
GO:0045637	GO:0045637	regulation of myeloid cell differentiation	210	0.51647	1.67277	0.00104275	0.0324345	0.0282278	2854	tags=20%, list=12%, signal=17%	CSF3/DCSTAMP/LILRB1/IFNG/CSF2/GPR68/IL23R/POU4F2/HIST1H4D/SIGLEC15/CCR1/IL23A/IL34/HIST2H4B/HIST1H4H/CD74/EVI2B/THBS1/NR4A3/HIST1H3A/HIST1H4J/KITLG/CCL3/HIST1H3H/MAFB/LIF/KLF10/HIST1H3B/TRIB1/ETS1/IL12B/GPR55/ID2/CBFB/MPL/H3F3B/HIST1H4E/MIR222/INHBA/MYC/HIST4H4
GO:0060326	GO:0060326	cell chemotaxis	210	0.615001	1.9919	0.00104275	0.0324345	0.0282278	2662	tags=28%, list=11%, signal=25%	CXCR3/IL10/GPR183/CXCL6/CXCL8/IL1RN/VCAM1/CXCL10/CCR4/CCL20/IL1B/CXCL3/CCL2/CCL7/TNFSF14/CMKLR1/IL6/CNR2/CCR7/CXCL5/CCR1/CCRL2/FLT1/IL23A/C5AR2/PDE4D/S1PR1/SAA2/ADGRE2/CD74/IL36B/PDE4B/THBS1/NR4A1/CCL4/PDGFB/CCL3/HBEGF/NRP1/CXCL11/PIK3CD/FGF1/HRG/S100A14/AZU1/CYP19A1/PIK3CG/PRKCD/RAC2/HGF/VEGFC/CXCL9/FGF4/CX3CR1/PDGFRB/FGF2/TMEM102/GREM1
GO:1902105	GO:1902105	regulation of leukocyte differentiation	212	0.544956	1.76428	0.00104275	0.0324345	0.0282278	4920	tags=35%, list=20%, signal=28%	DCSTAMP/LILRB1/IFNG/GPR68/IL23R/POU4F2/TOX/SIGLEC15/VNN1/CCR1/TNFRSF18/IL23A/IL34/CD74/EVI2B/PTPN6/PRDM1/IL12RB1/CD28/KITLG/CD83/CCL3/IL7R/FOXP3/RUNX3/IRF4/FOXJ1/MAFB/IL4R/NFATC2/LIF/NLRP3/KLF10/ZC3H12A/TBX21/TRIB1/IL12B/GPR55/CTLA4/ID2/CBFB/ZAP70/LOXL3/INHBA/MYC/MIR17HG/TGFBR2/BTN2A2/TNF/FOXP1/SOX13/NFKBIZ/PTPRC/IRF1/RUNX1/IL4/ZEB1/FLT3LG/TAL1/SH3RF1/RASGRP1/ZFP36L1/LEF1/JAK3/CARD11/CEBPB/RARA/P…
GO:1903037	GO:1903037	regulation of leukocyte cell-cell adhesion	231	0.563385	1.83181	0.00104275	0.0324345	0.0282278	5066	tags=39%, list=21%, signal=31%	IL10/LILRB1/PLA2G2D/VCAM1/IFNG/IDO1/IGF1/IL23R/IL1B/HAVCR2/CCL2/TNFSF14/IL6/BTLA/VNN1/CCR7/IL23A/LCK/CD74/PTPN6/IL12RB1/NR4A3/CD209/CD28/CD274/CD83/HAS2/IL7R/SDC4/FOXP3/RUNX3/FOXJ1/IL4R/NLRP3/ZC3H12A/DPP4/TBX21/ETS1/CD55/IL12B/ADTRP/CTLA4/CBFB/ICAM1/EFNB3/TNFRSF21/ZAP70/LOXL3/MIR222/CD44/SPN/MIR221/TGFBR2/BTN2A2/PDCD1/TNF/NFKBIZ/PTPRC/IRF1/CORO1A/RUNX1/IL6R/IL4/EFNB2/SKAP1/CD276/GRAP2/RASGRP1/LAG…
GO:0051251	GO:0051251	positive regulation of lymphocyte activation	214	0.564842	1.82978	0.00104384	0.0324345	0.0282278	5355	tags=38%, list=22%, signal=30%	GPR183/LILRB1/VCAM1/IFNG/IGF1/IL23R/IL1B/HAVCR2/CCL2/TOX/TNFSF14/IL6/BTLA/VNN1/CCR7/IL23A/LCK/TNFRSF4/CD74/PTPN6/IL12RB1/CD209/CD28/CD274/CD83/IL7R/FOXP3/RUNX3/IL4R/NFATC2/NLRP3/DPP4/TBX21/CD55/IL12B/CLCF1/CTLA4/CBFB/MPL/EFNB3/ZAP70/TAC1/CHRNB2/TGFBR2/BTN2A2/PDCD1/NFKBIZ/PTPRC/CORO1A/RUNX1/IL6R/IL4/EFNB2/FLT3LG/CD276/GRAP2/RASGRP1/ICOS/JAK3/SIRPB1/CDC42/CARD11/BCL10/RARA/PPP2R3C/TGFB1/NFKBID/SPTA…
GO:0007162	GO:0007162	negative regulation of cell adhesion	222	0.468142	1.51695	0.00104603	0.0324345	0.0282278	4768	tags=29%, list=20%, signal=24%	IL10/LILRB1/PLA2G2D/IL1RN/IDO1/WNT1/ANGPT2/HAVCR2/CD74/POSTN/PTPN6/THBS1/CD274/SDC4/FOXP3/RUNX3/TACSTD2/PLXNA2/FOXJ1/IL4R/HRG/ZC3H12A/TBX21/PRKCD/ADTRP/CTLA4/CBFB/MBP/TNFRSF21/MYADM/LOXL3/SPINT2/ABAT/PHLDB2/MIR222/GBP1/BMP2/SNAI2/TGFBI/SPN/CDSN/MIR221/BTN2A2/GTPBP4/TNC/SERPINE1/PTPRC/IRF1/PLXND1/RUNX1/LAG3/MIR138-1/B4GALNT2/JAG1/PODXL/LPXN/RIPOR2/PTPN22/JAK3/CEBPB/PRKAR1A/TGFB1/RCC2/NFKBID/CORO1C
GO:0051146	GO:0051146	striated muscle cell differentiation	222	0.485805	1.57419	0.00104603	0.0324345	0.0282278	5131	tags=35%, list=21%, signal=28%	CXCL10/DKK1/RGS4/IGF1/MYPN/WNT1/TRIM72/RGS2/TNFSF14/NPHS1/SMYD1/TBX1/BHLHA15/ACTC1/ALPK3/SLC8A1/TTN/MYBPC2/DMD/CD53/TBX3/MYH11/NRG1/IL4R/NFATC2/FLNC/NRAP/EHD1/SIK1/KDM6B/CXCL9/PDGFRB/KCNH1/GREM1/MIR222/BMP2/MYH3/FER1L5/TPM1/DNER/KRT19/WT1/BIN3/MYOM2/TMOD1/RBM24/EFNB2/BARX2/FLT3LG/MYH6/FAM129B/NEB/PDLIM5/MSX1/ADAM12/ACTN2/MYOZ1/RIPOR2/ACTG1/KRT8/HOMER1/RARA/PRKAR1A/TGFB1/SPAG9/MYOM1/STAC3/EDN1/WDR…
GO:0071356	GO:0071356	cellular response to tumor necrosis factor	190	0.576581	1.86579	0.00104932	0.0324345	0.0282278	2829	tags=22%, list=12%, signal=20%	DCSTAMP/CXCL8/VCAM1/CCL20/BIRC3/TRAF1/AIM2/NR1H4/CCL2/CCL7/TNFSF14/CARD14/TNFSF15/HIST1H2BJ/TNFRSF18/FABP4/TNFAIP3/TNFRSF4/POSTN/CCL4/TNFRSF11B/TNFRSF8/SLC2A4/SPHK1/CCL3/HAS2/EDARADD/NFKB1/GPD1/WDR35/TNFRSF9/ZC3H12A/TNFRSF12A/ICAM1/TNFRSF1B/TNFRSF21/LTB/CLDN1/GBP1/ST18/NPNT/TRAF3
GO:0030217	GO:0030217	T cell differentiation	186	0.579842	1.8771	0.00105152	0.0324345	0.0282278	4325	tags=35%, list=18%, signal=29%	GPR183/PLA2G2D/IFNG/SEMA4A/IL23R/WNT1/IL6/VNN1/CCR7/TNFRSF18/IL23A/LCK/RHOH/TCF7/CD74/RELB/PRDM1/IL12RB1/BCL3/CD28/CD83/IL7R/FOXP3/RUNX3/IRF4/FOXJ1/PIK3CD/MAFB/IL4R/NFATC2/NLRP3/ZC3H12A/RORC/TBX21/IL12B/PKNOX1/LFNG/CTLA4/CBFB/FZD8/ZAP70/LOXL3/SPN/IL18R1/DLL4/TGFBR2/BTN2A2/FOXP1/SOX13/NFKBIZ/PTPRC/IRF1/ITK/RUNX1/IL4/ZEB1/SH3RF1/RASGRP1/ZFP36L1/LEF1/FCER1G/PTPN22/JAK3/CD3D/CARD11
GO:0071216	GO:0071216	cellular response to biotic stimulus	186	0.610715	1.97705	0.00105152	0.0324345	0.0282278	2501	tags=22%, list=10%, signal=19%	CSF3/IL10/CXCL6/LILRB1/CXCL8/IL1RN/CXCL10/CSF2/IL24/IL1B/HAVCR2/NR1H4/IRGM/CXCL3/CCL2/IL6/CXCL5/PDE4D/TNFAIP3/NUGGC/IL36B/PDE4B/NR1D1/CD274/CCL3/CXCL11/BMP6/NFKB1/CD36/NLRP3/ZC3H12A/TRIB1/CD55/IL12B/PPARD/ICAM1/TNFRSF1B/TNIP3/CXCL9/CX3CR1
GO:0002449	GO:0002449	lymphocyte mediated immunity	188	0.560453	1.81415	0.00105263	0.0324345	0.0282278	4223	tags=27%, list=18%, signal=23%	IL10/LILRB1/GAPT/SH2D1B/IL23R/IL1B/HAVCR2/CRP/IL6/PRF1/POU2F2/IL23A/MYO1G/CD74/GZMB/PTPN6/IL12RB1/BCL3/SERPINB4/CD28/IL7R/FOXP3/FOXJ1/KLRC2/IL4R/NLRP3/TBX21/RAET1E/PRKCD/CD55/IL12B/CLCF1/ICAM1/RAET1E/IL27RA/NCR3/IL18R1/TNF/PTPRC/CORO1A/IL4/PROKR1/C4A/RASGRP1/SUSD4/LAG3/SCART1/FCER1G/JAG1/ERCC1/CD96
GO:0002758	GO:0002758	innate immune response-activating signal transduction	188	0.513015	1.66059	0.00105263	0.0324345	0.0282278	3026	tags=19%, list=13%, signal=17%	TLR7/FGB/MUC13/BIRC3/MUC2/TRIM15/HAVCR2/NR1H4/ESR1/IRGM/DMBT1/TNFAIP3/S100A1/RELB/CTSS/CD209/NR1D1/MUC16/IRF4/MUC5AC/NFKB1/CD36/S100A14/MUC12/PRKCD/SARM1/TLR10/ITGAM/TNIP3/MUC15/IKBKE/IRAK3/IRAK2/TRAF3/MARCO/TLR5
GO:0009913	GO:0009913	epidermal cell differentiation	184	0.544652	1.76228	0.00105263	0.0324345	0.0282278	4655	tags=35%, list=19%, signal=28%	KRTAP13-2/KRT23/KRT39/KRT20/EREG/KRT6A/KRT4/KRT33A/KRT73/KRT12/KRT78/LIPK/LOR/AQP3/KRT79/PRR9/KRT34/KRTAP2-3/SPRR2D/KRT33B/KLK13/TP63/ERRFI1/TGM3/KRT5/KRT75/TMC1/SCEL/DSP/KRT17/KRTAP5-9/KRT9/MAFF/STRC/IVL/CDH3/KRT71/CBFB/ST14/SPINK6/IRF6/OVOL2/KRT7/WHRN/CDSN/KRT18/USH2A/POU4F3/EVPL/KRT15/KRT19/RUNX1/KRT86/FOXC1/ZFP36L1/JAG1/RIPOR2/KLK5/KRT8/EPHA2/PRKCH/SRSF6/FURIN/FOSL2
GO:0042113	GO:0042113	B cell activation	180	0.542261	1.75305	0.00105263	0.0324345	0.0282278	4325	tags=28%, list=18%, signal=23%	IL10/GPR183/GAPT/VCAM1/LYL1/NTRK1/IL11/IFNE/IL6/POU2F2/MZB1/TBC1D10C/MS4A1/TNFAIP3/TNFRSF4/CD74/PTPN6/BCL3/CD28/IL7R/FOXP3/FOXJ1/PIK3CD/NFATC2/CTPS1/TBX21/PRKCD/CLCF1/LFNG/CTLA4/ID2/TNFRSF21/ZAP70/IL27RA/INHBA/CHRNB2/MIR17HG/DOCK10/PTPRC/MFNG/KLF6/CD22/BAK1/IL4/PROKR1/ZBTB7A/ZFP36L1/LEF1/ERCC1/JAK3/CARD11
GO:0044706	GO:0044706	multi-multicellular organism process	179	0.535035	1.7298	0.00105374	0.0324345	0.0282278	4825	tags=34%, list=20%, signal=27%	IDO1/IL1B/ANGPT2/HAVCR2/ESR1/PSG6/RGS2/STC1/INSL4/SLC6A4/PRDM1/CYP1A1/AMBP/MMP9/FOSB/ITGA2/GHRL/THBD/ADRA2B/PSG2/PTHLH/P2RX1/MAFF/JUNB/FOSL1/PTGIS/LIF/TAC3/ETS1/ADM/PAPPA/PPARD/NAMPT/H3F3B/OVGP1/ARNTL/SLC2A1/TAC1/BMPR2/AGO2/TGFBR2/TFCP2L1/ACSL4/NR2F2/PSG7/PSG11/SPP1/STC2/TIMP1/NRK/ITGA3/MMP7/B4GALT1/RARA/POLR1B/ACR/PTGFR/TGFB1/EDN1/EMP2
GO:0070374	GO:0070374	positive regulation of ERK1 and ERK2 cascade	183	0.506275	1.63609	0.00105597	0.0324345	0.0282278	3707	tags=28%, list=15%, signal=24%	GPR183/FGB/CCL20/NTRK1/INSRR/HAVCR2/EPHA1/TIE1/CCL2/CCL7/P2RY6/CCR7/ALOX15/CCR1/FLT1/C5AR2/CSF1R/CD74/EPHA4/CCL4/CALCR/SEMA7A/PDGFB/CCL3/NRP1/MST1R/CD36/GPR55/IGF1R/ICAM1/FGF4/PDGFRB/FGF2/SPRY2/MIR222/BMP2/CD44/NPNT/EGFR/MARCO/EPHA5/MIR221/NTRK2/ROS1/FGF18/TNF/ARHGAP8/CTGF/PTPRC/EPHB6/MET/PDGFC
GO:0019722	GO:0019722	calcium-mediated signaling	176	0.495287	1.59794	0.00106045	0.0324345	0.0282278	3832	tags=23%, list=16%, signal=20%	CXCR3/CXCL8/VCAM1/CCR4/CCL20/IGF1/IRGM/CMKLR1/GRIN2A/PLEK/P2RY6/CCR7/CCR1/CCRL2/TBC1D10C/PDE4D/BHLHA15/SLC8A1/PTGDR2/CCL4/DMD/SPHK1/CCL3/NRG1/NFATC2/AZU1/GRIN2D/ZAP70/CX3CR1/GBP1/EGFR/LAT/KSR2/TNF/RYR2/PTPRC/CD22/HAP1/GPR143/MCTP2/NMUR2
GO:0050920	GO:0050920	regulation of chemotaxis	176	0.564764	1.82209	0.00106045	0.0324345	0.0282278	3712	tags=28%, list=15%, signal=24%	SUCNR1/GPR183/CXCL8/CXCL10/CCR4/SEMA4A/ANGPT2/POU4F2/CCL2/CCL7/TNFSF14/CMKLR1/IL6/F3/CCR7/CCR1/IL23A/C5AR2/S1PR1/CD74/SEMA3A/THBS1/CCL4/ITGA2/SEMA7A/PDGFB/CCL3/NRP1/FGF1/HRG/S100A14/AZU1/CYP19A1/RAC2/VEGFC/FGF4/PDGFRB/FGF2/TMEM102/GREM1/BMPR2/FGF18/SEMA3C/SERPINE1/SLIT2/SEMA5B/SMAD3/MET/IL6R/EFNB2
GO:0002699	GO:0002699	positive regulation of immune effector process	171	0.507009	1.63095	0.00106383	0.0324345	0.0282278	4481	tags=25%, list=19%, signal=20%	LILRB1/IFNG/SH2D1B/IL23R/IL1B/TRIM15/IL6/MZB1/IL23A/TNFRSF4/ADGRE2/CD74/IL12RB1/NR4A3/CD28/SEMA7A/FOXP3/IL4R/CD36/NLRP3/TBX21/RAET1E/RAC2/IL12B/CLCF1/ITGAM/RAET1E/NCR3/DDX21/IL18R1/TNF/NFKBIZ/PTPRC/IL4/FER/RASGRP1/CD177/LAG3/FCER1G/KLK5/BCL10/RARA
GO:0002573	GO:0002573	myeloid leukocyte differentiation	169	0.554037	1.78026	0.00106496	0.0324345	0.0282278	4862	tags=34%, list=20%, signal=27%	CSF3/DCSTAMP/GPR183/LILRB1/IFNG/CSF2/GPR68/IL23R/POU4F2/SIGLEC15/CCR7/CCR1/DHRS2/IL23A/IL34/CSF1R/CD74/EVI2B/RELB/MMP9/KITLG/CCL3/IRF4/JUNB/PIK3CD/MAFB/LIF/KLF10/TRIB1/IL12B/GPR55/MT1G/ID2/BATF2/INHBA/MYC/TGFBR2/TNF/FOXP1/TSPAN2/RUNX1/SBNO2/IL4/TAL1/EFNA2/ZFP36L1/LEF1/FCER1G/CDC42/CEBPB/EPHA2/RARA/DHRS7B/TGFB1/ESRRA/FADD/CDK6
GO:0042445	GO:0042445	hormone metabolic process	170	0.518035	1.66419	0.0010661	0.0324345	0.0282278	4625	tags=29%, list=19%, signal=24%	LRAT/IFNG/RDH8/SLC5A7/IL1B/ESR1/FOXA1/HSD17B2/AWAT2/SCG5/PAX8/DHRS2/REN/TPO/SULT1B1/SRD5A2/CYP1A1/PCSK1/CYP11A1/BMP6/DIO2/NFKB1/ENPEP/RDH10/CYP19A1/ADM/SERPINA6/IYD/CHST8/NGF/BMP2/ALDH8A1/TSPOAP1/BCO2/TNF/CHAT/SDR16C5/KLK6/GAL/DUOX2/SPP1/CRABP2/AKR1C2/STC2/PLB1/COLQ/ECE2/AANAT/FURIN/BMP5
GO:1903039	GO:1903039	positive regulation of leukocyte cell-cell adhesion	170	0.589848	1.89489	0.0010661	0.0324345	0.0282278	5355	tags=44%, list=22%, signal=34%	LILRB1/VCAM1/IFNG/IGF1/IL23R/IL1B/HAVCR2/CCL2/TNFSF14/IL6/BTLA/VNN1/CCR7/IL23A/LCK/CD74/PTPN6/IL12RB1/NR4A3/CD209/CD28/CD274/CD83/HAS2/IL7R/FOXP3/RUNX3/IL4R/NLRP3/DPP4/ETS1/CD55/IL12B/CTLA4/CBFB/ICAM1/EFNB3/ZAP70/CD44/TGFBR2/BTN2A2/PDCD1/TNF/NFKBIZ/PTPRC/CORO1A/RUNX1/IL6R/IL4/EFNB2/SKAP1/CD276/GRAP2/RASGRP1/ICOS/JAK3/SIRPB1/CDC42/CARD11/BCL10/RARA/TGFB1/NFKBID/SPTA1/FADD/ZMIZ1/PDCD1LG2/HES1/SIRPA…
GO:0061138	GO:0061138	morphogenesis of a branching epithelium	164	0.479067	1.53489	0.00107296	0.0324345	0.0282278	3632	tags=27%, list=15%, signal=23%	IL10/GDNF/WNT1/ESR1/FOXA1/AREG/PAX8/SOX8/TGM2/SEMA3A/TP63/HNF1B/FOXD1/HHIP/ESRP2/TACSTD2/NRP1/TBX3/FGF1/RDH10/ADM/HGF/ST14/RSPO3/ADAMTS16/FGF2/SPRY2/SPINT2/GREM1/BMP2/SNAI2/NOTCH4/NPNT/MYC/RASIP1/DLL4/TGFBR2/TNF/COL4A1/TNC/SEMA3C/SLIT2/WT1/PLXND1/MET
GO:1903708	GO:1903708	positive regulation of hemopoiesis	159	0.565446	1.8072	0.00107296	0.0324345	0.0282278	4145	tags=30%, list=17%, signal=25%	CSF3/DCSTAMP/IFNG/GPR68/IL23R/POU4F2/TOX/VNN1/CCR1/IL23A/IL34/CD74/EVI2B/IL12RB1/KITLG/CD83/IL7R/FOXP3/RUNX3/IL4R/LIF/NLRP3/KLF10/TRIB1/ETS1/IL12B/ID2/CBFB/MPL/ZAP70/MIR222/INHBA/MIR221/TGFBR2/BTN2A2/TNF/NFKBIZ/PTPRC/RUNX1/IL4/ZNF16/FLT3LG/TAL1/FOXC1/RASGRP1/ZFP36L1/LEF1/JAG1
GO:1904018	GO:1904018	positive regulation of vasculature development	164	0.492215	1.57701	0.00107296	0.0324345	0.0282278	3712	tags=26%, list=15%, signal=22%	IL10/CXCL8/ANGPTL4/IL1B/ANGPT2/EPHA1/F3/FLT1/LRG1/S100A1/FOXC2/APLNR/THBS1/PDGFB/GHRL/SPHK1/HMGA2/NRP1/ASB4/FGF1/PTGIS/BTG1/ZC3H12A/ETS1/ADM/HGF/CDH5/VEGFC/CYBB/CX3CR1/FGF2/GREM1/AGO2/TGFBR2/FGF18/JCAD/SERPINE1/HK2/RHOB/HYAL1/RUNX1/EFNB2
GO:0002703	GO:0002703	regulation of leukocyte mediated immunity	161	0.535768	1.71275	0.00107411	0.0324345	0.0282278	4265	tags=26%, list=18%, signal=22%	IL10/CXCL6/LILRB1/SH2D1B/IL23R/IL1B/HAVCR2/IL6/IL23A/ADGRE2/PTPN6/IL12RB1/SERPINB4/CD28/IL7R/FOXP3/FOXJ1/IL4R/NLRP3/TBX21/RAET1E/RAC2/IL12B/CLCF1/ITGAM/RAET1E/IL27RA/NCR3/DDX21/IL18R1/TNF/PTPRC/IL4/BCR/PROKR1/FER/RASGRP1/CD177/LAG3/FCER1G/CD96/JAK3
GO:0050670	GO:0050670	regulation of lymphocyte proliferation	156	0.570567	1.82384	0.00107411	0.0324345	0.0282278	5012	tags=38%, list=21%, signal=31%	IL10/GPR183/LILRB1/PLA2G2D/VCAM1/IDO1/IGF1/IL23R/IL1B/HAVCR2/IL6/MZB1/IL23A/TNFRSF4/CD74/PTPN6/IL12RB1/CD209/CD28/CD274/SDC4/FOXP3/FOXJ1/NFATC2/CD55/RAC2/IL12B/CLCF1/CTLA4/MPL/TNFRSF21/ZAP70/TAC1/SPN/CHRNB2/TGFBR2/BTN2A2/PTPRC/IRF1/CD22/CORO1A/IL6R/IL4/FLT3LG/SH3RF1/CD276/GAL/PTPN22/JAK3/CARD11/CEBPB/PRKAR1A/LST1/TGFB1/TNFSF18/SPTA1/FADD/PDCD1LG2/HES1/WNT3A
GO:0050870	GO:0050870	positive regulation of T cell activation	161	0.57767	1.84671	0.00107411	0.0324345	0.0282278	5355	tags=41%, list=22%, signal=32%	LILRB1/VCAM1/IFNG/IGF1/IL23R/IL1B/HAVCR2/CCL2/TNFSF14/IL6/BTLA/VNN1/CCR7/IL23A/LCK/CD74/PTPN6/IL12RB1/CD209/CD28/CD274/CD83/IL7R/FOXP3/RUNX3/IL4R/NLRP3/DPP4/CD55/IL12B/CTLA4/CBFB/EFNB3/ZAP70/TGFBR2/BTN2A2/PDCD1/NFKBIZ/PTPRC/CORO1A/RUNX1/IL6R/IL4/EFNB2/CD276/GRAP2/RASGRP1/ICOS/JAK3/SIRPB1/CDC42/CARD11/BCL10/RARA/TGFB1/NFKBID/SPTA1/FADD/ZMIZ1/PDCD1LG2/HES1/SIRPA/YES1/PIK3CA/SRC/CYLD
GO:0070663	GO:0070663	regulation of leukocyte proliferation	161	0.576057	1.84155	0.00107411	0.0324345	0.0282278	5012	tags=39%, list=21%, signal=31%	IL10/GPR183/LILRB1/PLA2G2D/VCAM1/IDO1/IGF1/IL23R/IL1B/HAVCR2/IL6/MZB1/IL23A/TNFAIP3/TNFRSF4/CD74/PTPN6/IL12RB1/CD209/CD28/KITLG/CD274/SDC4/FOXP3/FOXJ1/NFATC2/CD55/RAC2/IL12B/CLCF1/CTLA4/MPL/TNFRSF21/ZAP70/GREM1/TAC1/SPN/CHRNB2/TGFBR2/BTN2A2/PTPRC/IRF1/CD22/CORO1A/IL6R/IL4/FLT3LG/SH3RF1/CD276/GAL/PTPN22/JAK3/CARD11/CEBPB/PRKAR1A/LST1/TGFB1/TNFSF18/SPTA1/FADD/PDCD1LG2/HES1/WNT3A
GO:0071219	GO:0071219	cellular response to molecule of bacterial origin	163	0.644835	2.06515	0.00107411	0.0324345	0.0282278	2501	tags=25%, list=10%, signal=22%	CSF3/IL10/CXCL6/LILRB1/CXCL8/IL1RN/CXCL10/CSF2/IL24/IL1B/HAVCR2/NR1H4/IRGM/CXCL3/CCL2/IL6/CXCL5/PDE4D/TNFAIP3/NUGGC/IL36B/PDE4B/NR1D1/CD274/CCL3/CXCL11/BMP6/NFKB1/CD36/NLRP3/ZC3H12A/TRIB1/CD55/IL12B/PPARD/ICAM1/TNFRSF1B/TNIP3/CXCL9/CX3CR1
GO:0032944	GO:0032944	regulation of mononuclear cell proliferation	157	0.568584	1.8183	0.00107527	0.0324345	0.0282278	5012	tags=38%, list=21%, signal=30%	IL10/GPR183/LILRB1/PLA2G2D/VCAM1/IDO1/IGF1/IL23R/IL1B/HAVCR2/IL6/MZB1/IL23A/TNFRSF4/CD74/PTPN6/IL12RB1/CD209/CD28/CD274/SDC4/FOXP3/FOXJ1/NFATC2/CD55/RAC2/IL12B/CLCF1/CTLA4/MPL/TNFRSF21/ZAP70/TAC1/SPN/CHRNB2/TGFBR2/BTN2A2/PTPRC/IRF1/CD22/CORO1A/IL6R/IL4/FLT3LG/SH3RF1/CD276/GAL/PTPN22/JAK3/CARD11/CEBPB/PRKAR1A/LST1/TGFB1/TNFSF18/SPTA1/FADD/PDCD1LG2/HES1/WNT3A
GO:0050663	GO:0050663	cytokine secretion	157	0.529569	1.69353	0.00107527	0.0324345	0.0282278	3303	tags=25%, list=14%, signal=22%	IL10/LILRB1/GBP5/IL1RL1/AIM2/HAVCR2/NR1H4/LCP2/CRP/CCR7/OSM/C5AR2/TNFAIP3/TNFRSF4/CSF1R/POSTN/ITGB6/CD274/PAEP/GHRL/CCL3/FOXP3/CD200R1/IL4R/CD36/NLRP3/ZC3H12A/TLR10/MBP/TNFRSF21/IL1R2/GBP1/SSC5D/TLR5/EZR/BTN2A2/TNF/FN1/FOXP1
GO:0071222	GO:0071222	cellular response to lipopolysaccharide	157	0.656213	2.09853	0.00107527	0.0324345	0.0282278	2501	tags=25%, list=10%, signal=23%	CSF3/IL10/CXCL6/LILRB1/CXCL8/IL1RN/CXCL10/CSF2/IL24/IL1B/HAVCR2/NR1H4/IRGM/CXCL3/CCL2/IL6/CXCL5/PDE4D/TNFAIP3/NUGGC/IL36B/PDE4B/NR1D1/CD274/CCL3/CXCL11/BMP6/NFKB1/CD36/NLRP3/ZC3H12A/TRIB1/CD55/IL12B/PPARD/ICAM1/TNFRSF1B/TNIP3/CXCL9/CX3CR1
GO:0007565	GO:0007565	female pregnancy	155	0.540054	1.72347	0.00107875	0.0324345	0.0282278	4674	tags=31%, list=19%, signal=25%	IDO1/IL1B/ANGPT2/HAVCR2/ESR1/PSG6/RGS2/STC1/INSL4/PRDM1/AMBP/MMP9/FOSB/ITGA2/GHRL/THBD/ADRA2B/PSG2/PTHLH/JUNB/FOSL1/PTGIS/LIF/TAC3/ETS1/ADM/PAPPA/PPARD/NAMPT/H3F3B/OVGP1/SLC2A1/BMPR2/AGO2/TGFBR2/TFCP2L1/ACSL4/NR2F2/PSG7/PSG11/SPP1/STC2/TIMP1/ITGA3/MMP7/RARA/POLR1B/TGFB1
GO:0031348	GO:0031348	negative regulation of defense response	155	0.538733	1.71926	0.00107875	0.0324345	0.0282278	3919	tags=28%, list=16%, signal=23%	IL10/OTOP1/LILRB1/NT5E/HAVCR2/NR1H4/CNR2/NLRC3/TNFAIP3/PROC/MEFV/WFDC1/SERPINB4/GHRL/FOXP3/CD200R1/NFKB1/PTGIS/NLRP3/GPR17/ZC3H12A/CYP19A1/ETS1/PRKCD/A2M/IL12B/HGF/CDH5/PPARD/TNFRSF1B/IL1R2/IRAK3/MIR222/FAM19A3/TNFAIP6/MIR221/ACP5/PTPRC/SMAD3/METRNL/BCR/DRD2/TNFRSF1A
GO:0030595	GO:0030595	leukocyte chemotaxis	152	0.654725	2.08887	0.00107991	0.0324345	0.0282278	2773	tags=29%, list=12%, signal=26%	CXCR3/IL10/GPR183/CXCL6/CXCL8/IL1RN/CXCL10/CCL20/IL1B/CXCL3/CCL2/CCL7/TNFSF14/CMKLR1/IL6/CNR2/CCR7/CXCL5/CCR1/FLT1/IL23A/C5AR2/PDE4D/S1PR1/ADGRE2/CD74/IL36B/PDE4B/THBS1/CCL4/PDGFB/CCL3/CXCL11/PIK3CD/S100A14/AZU1/CYP19A1/PIK3CG/RAC2/VEGFC/CXCL9/TMEM102/GREM1/CHGA
GO:0050731	GO:0050731	positive regulation of peptidyl-tyrosine phosphorylation	152	0.572125	1.82534	0.00107991	0.0324345	0.0282278	3919	tags=36%, list=16%, signal=30%	CSF3/IFNG/CSF2/EREG/RELN/IL24/IGF1/IL11/IL23R/EPGN/IL6/DOK7/AREG/VTN/OSM/TNFRSF18/IL23A/CSF1R/TGFA/CASS4/CD74/TEC/EPHA4/KITLG/PDGFB/GHRL/HBEGF/NRP1/PTK6/NRG1/ITGB3/CD36/LIF/PECAM1/IL12B/CLCF1/HGF/ICAM1/NEURL1/GREM1/CD44/NEDD9/CSPG4/MIR221/NTRK2/DLG3/CNTF/PTPRC/EHD4/IL6R/IL4/CRLF1/TAL1/TNFRSF1A
GO:0050866	GO:0050866	negative regulation of cell activation	142	0.533133	1.69283	0.00108225	0.0324345	0.0282278	5577	tags=40%, list=23%, signal=31%	IL10/LILRB1/PLA2G2D/IDO1/HAVCR2/CNR2/TBC1D10C/TNFAIP3/CD74/PTPN6/CD274/PDGFB/THBD/SDC4/FOXP3/RUNX3/FOXJ1/IL4R/ZC3H12A/TBX21/PRKCD/CTLA4/ID2/CBFB/ADGRF5/TNFRSF21/LOXL3/ABAT/FAM19A3/INHBA/SPN/BTN2A2/PTPRC/IRF1/RUNX1/BCR/FER/GAL/LAG3/RIPOR2/PTPN22/JAK3/CEBPB/PRKAR1A/LST1/TGFB1/NFKBID/ABR/PDCD1LG2/CX3CL1/UBASH3B/AXL/LRRC32/PRKG1/C1QTNF1/APOE/SERPINE2
GO:0030216	GO:0030216	keratinocyte differentiation	140	0.610318	1.93625	0.0010846	0.0324345	0.0282278	2700	tags=29%, list=11%, signal=26%	KRTAP13-2/KRT23/KRT39/KRT20/EREG/KRT6A/KRT4/KRT33A/KRT73/KRT12/KRT78/LIPK/LOR/AQP3/KRT79/PRR9/KRT34/KRTAP2-3/SPRR2D/KRT33B/KLK13/TP63/ERRFI1/TGM3/KRT5/KRT75/SCEL/DSP/KRT17/KRTAP5-9/KRT9/IVL/CDH3/KRT71/CBFB/ST14/SPINK6/IRF6/OVOL2/KRT7
GO:0042098	GO:0042098	T cell proliferation	141	0.582752	1.84913	0.00108578	0.0324345	0.0282278	3864	tags=27%, list=16%, signal=23%	IL10/LILRB1/PLA2G2D/VCAM1/IDO1/IGF1/IL23R/IL1B/HAVCR2/TNFSF14/IL6/IL23A/TNFRSF4/PTPN6/IL12RB1/CD209/CD28/CD274/SDC4/FOXP3/FOXJ1/CTPS1/PIK3CG/CD55/RAC2/IL12B/TNFRSF21/ZAP70/SPN/TGFBR2/BTN2A2/PTPRC/IRF1/CORO1A/IL6R/IL4/SH3RF1/CD276
GO:0097529	GO:0097529	myeloid leukocyte migration	141	0.615388	1.95269	0.00108578	0.0324345	0.0282278	2773	tags=28%, list=12%, signal=25%	CXCL6/CXCL8/IL1RN/CXCL10/CCL20/IL1B/CXCL3/CCL2/CCL7/CMKLR1/IL6/CCR7/CXCL5/CCR1/FLT1/IL23A/C5AR2/PDE4D/ADGRE2/CD74/IL36B/PDE4B/THBS1/CCL4/PDGFB/CCL3/CD200R1/CXCL11/PIK3CD/S100A14/AZU1/PECAM1/CYP19A1/PIK3CG/RAC2/VEGFC/CXCL9/CX3CR1/GREM1/CHGA
GO:0006959	GO:0006959	humoral immune response	134	0.710527	2.24114	0.00110011	0.0324345	0.0282278	3219	tags=37%, list=13%, signal=32%	HIST1H2BG/GPR183/CXCL6/CXCL8/FGB/CXCL10/IFNG/CPN2/IFNE/HIST1H2BC/CXCL3/CCL2/KLK3/RNASE7/CRP/HIST1H2BF/IL6/VTN/CCR7/POU2F2/DMBT1/CXCL5/HIST1H2BJ/C5AR2/MS4A1/HIST1H2BK/PTPN6/BCL3/CD28/CD83/HTN1/POU2AF1/CXCL11/FOXJ1/TREM1/HRG/AZU1/A2M/CD55/CXCL9/TNFRSF21/H2BFS/HTN3/CHGA/HIST2H2BE/COLEC11/CD59/PDCD1/TNF
GO:0002285	GO:0002285	lymphocyte activation involved in immune response	127	0.637396	2.00075	0.00111111	0.0324345	0.0282278	4265	tags=34%, list=18%, signal=28%	IL10/GPR183/LILRB1/GAPT/IFNG/SEMA4A/IL23R/IFNE/HAVCR2/IL6/IL23A/RELB/IL12RB1/BCL3/CD28/LCP1/FOXP3/IRF4/IL4R/NLRP3/ZC3H12A/RORC/TBX21/IL12B/CLCF1/LFNG/ICAM1/LOXL3/IL27RA/SPN/IL18R1/DOCK10/FOXP1/NFKBIZ/PTPRC/MFNG/CORO1A/IL4/PROKR1/LEF1/FCER1G/ERCC1/JAK3
GO:1903034	GO:1903034	regulation of response to wounding	127	0.586579	1.84125	0.00111111	0.0324345	0.0282278	4321	tags=32%, list=18%, signal=27%	SERPINB2/IL10/FGB/EPPK1/F3/PLEK/VTN/SCARF1/TNFAIP3/PROC/PLAU/TEC/FOXC2/THBS1/WFDC1/EPHA4/PDGFB/HBEGF/THBD/PLAUR/CD36/HRG/PRKCD/ADTRP/PPARD/TNFRSF12A/FGF2/ABAT/PHLDB2/MIR222/SOX15/MIR221/TGFBR2/CNTF/SERPINE1/SMAD3/SPP1/FCER1G/PLAT/RREB1/NTRK3
GO:0042742	GO:0042742	defense response to bacterium	130	0.61042	1.91569	0.00111359	0.0324345	0.0282278	4372	tags=43%, list=18%, signal=35%	HIST1H2BG/IL10/CXCL6/FGB/MPO/CCL20/IL23R/IFNE/HAVCR2/NR1H4/IRGM/HIST1H2BC/KLK3/RNASE7/CRP/HIST1H2BF/IL6/DMBT1/HIST1H2BJ/IL23A/CD160/HIST1H2BK/BCL3/HTN1/VGF/PRG2/CD36/S100A14/NLRP3/AZU1/PRKCD/IL12B/H2BFS/HTN3/IL27RA/CHGA/HIST2H2BE/SPN/SSC5D/TLR5/TNF/FOXP1/ACP5/SERPINE1/HIST1H2BE/IL6R/TNFRSF1A/DEFB124/FCER1G/KLK5/NLRP10/MMP7/SEH1L/CFP/CEBPB/EPHA2
GO:0002819	GO:0002819	regulation of adaptive immune response	126	0.569123	1.78346	0.00111982	0.0324345	0.0282278	3811	tags=27%, list=16%, signal=23%	IL10/LILRB1/IL1RL1/IL23R/IL1B/HAVCR2/IL6/ALOX15/IL23A/TNFAIP3/PTPN6/IL12RB1/CD28/CD274/IL7R/FOXP3/FOXJ1/IL4R/NLRP3/ZC3H12A/TBX21/IL12B/CLCF1/LOXL3/IL27RA/IL18R1/TNF/NFKBIZ/PTPRC/IRF1/IL6R/IL4/SKAP1/PROKR1
GO:0002695	GO:0002695	negative regulation of leukocyte activation	122	0.544705	1.70296	0.00112108	0.0324345	0.0282278	5046	tags=38%, list=21%, signal=30%	IL10/LILRB1/PLA2G2D/IDO1/HAVCR2/CNR2/TBC1D10C/TNFAIP3/CD74/PTPN6/CD274/SDC4/FOXP3/RUNX3/FOXJ1/IL4R/ZC3H12A/TBX21/CTLA4/ID2/CBFB/ADGRF5/TNFRSF21/LOXL3/FAM19A3/INHBA/SPN/BTN2A2/PTPRC/IRF1/RUNX1/BCR/FER/GAL/LAG3/RIPOR2/PTPN22/JAK3/CEBPB/PRKAR1A/LST1/TGFB1/NFKBID/ABR/PDCD1LG2/CX3CL1
GO:0031497	GO:0031497	chromatin assembly	122	0.543192	1.69823	0.00112108	0.0324345	0.0282278	3070	tags=21%, list=13%, signal=19%	HIST1H2BG/HIST1H1E/HIST1H2BC/HIST1H4D/HIST1H2BF/HIST1H2BM/HIST1H1T/HIST1H2BJ/HIST2H4B/HIST1H4H/HIST1H2BK/H1F0/HIST1H3A/HIST1H4J/M1AP/HMGA2/HIST1H3H/HIST1H2BD/IPO4/HIST1H3B/H3F3B/HIST1H4E/H2BFS/HIST2H2BE/HIST4H4/TSPY26P
GO:0048660	GO:0048660	regulation of smooth muscle cell proliferation	122	0.554966	1.73504	0.00112108	0.0324345	0.0282278	3303	tags=30%, list=14%, signal=26%	IL10/IFNG/EREG/IGF1/NPR3/IL6/P2RY6/TNFAIP3/S1PR1/TGM2/IGFBP3/VIP/THBS1/NR4A3/MMP9/ITGA2/PDGFB/HBEGF/NPPC/PTGIR/TRIB1/IL12B/PPARD/ID2/NAMPT/PDGFRB/FGF2/MIR222/EGFR/MIR339/MIR221/ERN1/TGFBR2/TNF/TPM1/FOXP1
GO:0048659	GO:0048659	smooth muscle cell proliferation	124	0.550762	1.72161	0.00112233	0.0324345	0.0282278	3303	tags=29%, list=14%, signal=25%	IL10/IFNG/EREG/IGF1/NPR3/IL6/P2RY6/TNFAIP3/S1PR1/TGM2/IGFBP3/VIP/THBS1/NR4A3/MMP9/ITGA2/PDGFB/HBEGF/NPPC/PTGIR/TRIB1/IL12B/PPARD/ID2/NAMPT/PDGFRB/FGF2/MIR222/EGFR/MIR339/MIR221/ERN1/TGFBR2/TNF/TPM1/FOXP1
GO:0070555	GO:0070555	response to interleukin-1	123	0.538118	1.68117	0.00112613	0.0324345	0.0282278	2737	tags=17%, list=11%, signal=15%	CXCL8/FGB/IL1RN/CCL20/IL1B/CCL2/CCL7/IL6/CCL4/CCL3/HAS2/NFKB1/PTGIS/ZC3H12A/ETS1/ICAM1/IL1R2/IRAK3/GBP1/ST18/IRAK2
GO:0051384	GO:0051384	response to glucocorticoid	121	0.55842	1.74239	0.0011274	0.0324345	0.0282278	3490	tags=26%, list=14%, signal=22%	IL10/IL1RN/ACSBG1/IL6/STC1/AREG/FBXO32/TH/SSTR3/ERRFI1/CALCR/FOSB/FOXO1/WNT7B/NR3C1/BMP6/FOSL1/MAOB/ADM/SLIT3/CDO1/PAPPA/ICAM1/CLDN1/EGFR/ALPL/ATP2B1/TPH2/TNF/SSTR2/SLIT2
GO:0002822	GO:0002822	regulation of adaptive immune response based on somatic recombination of immune receptors built from immunoglobulin superfamily domains	117	0.57123	1.77966	0.00112867	0.0324345	0.0282278	4287	tags=29%, list=18%, signal=24%	IL10/LILRB1/IL1RL1/IL23R/IL1B/HAVCR2/IL6/IL23A/TNFAIP3/PTPN6/IL12RB1/CD28/CD274/IL7R/FOXP3/FOXJ1/IL4R/NLRP3/ZC3H12A/TBX21/IL12B/CLCF1/LOXL3/IL27RA/IL18R1/TNF/NFKBIZ/PTPRC/IL6R/IL4/PROKR1/FCER1G/JAK3/NLRP10
GO:0032635	GO:0032635	interleukin-6 production	106	0.531254	1.6438	0.00112994	0.0324345	0.0282278	2592	tags=22%, list=11%, signal=19%	IL10/TLR7/IL1RN/EREG/IL1B/HAVCR2/NR1H4/IL6/NLRC3/C5AR2/TNFAIP3/IL36B/PTPN6/PAEP/GHRL/FOXP3/CD200R1/FOXJ1/CD36/ZC3H12A/HGF/MBP/IRAK3
GO:0042129	GO:0042129	regulation of T cell proliferation	116	0.596621	1.85651	0.00112994	0.0324345	0.0282278	4983	tags=38%, list=21%, signal=30%	IL10/LILRB1/PLA2G2D/VCAM1/IDO1/IGF1/IL23R/IL1B/HAVCR2/IL6/IL23A/PTPN6/IL12RB1/CD209/CD28/CD274/SDC4/FOXP3/FOXJ1/CD55/RAC2/IL12B/TNFRSF21/ZAP70/SPN/TGFBR2/BTN2A2/PTPRC/IRF1/CORO1A/IL6R/IL4/SH3RF1/CD276/JAK3/CARD11/CEBPB/PRKAR1A/TGFB1/TNFSF18/SPTA1/FADD/PDCD1LG2/HES1
GO:0002761	GO:0002761	regulation of myeloid leukocyte differentiation	96	0.595655	1.82282	0.00113122	0.0324345	0.0282278	4862	tags=38%, list=20%, signal=30%	DCSTAMP/LILRB1/IFNG/GPR68/IL23R/POU4F2/SIGLEC15/CCR1/IL23A/IL34/CD74/EVI2B/KITLG/CCL3/MAFB/LIF/KLF10/TRIB1/IL12B/GPR55/ID2/INHBA/MYC/TNF/FOXP1/RUNX1/IL4/TAL1/ZFP36L1/LEF1/CEBPB/RARA/TGFB1/ESRRA/FADD/CDK6
GO:0046631	GO:0046631	alpha-beta T cell activation	107	0.631131	1.95542	0.00113122	0.0324345	0.0282278	3673	tags=36%, list=15%, signal=31%	GPR183/LILRB1/PLA2G2D/IFNG/SEMA4A/IL23R/IL6/IL23A/TCF7/RELB/PRDM1/IL12RB1/BCL3/CD28/CD274/CD83/FOXP3/RUNX3/IRF4/IL4R/NLRP3/ZC3H12A/RORC/TBX21/CD55/IL12B/CBFB/ZAP70/LOXL3/SPN/IL18R1/TGFBR2/FOXP1/NFKBIZ/PTPRC/IRF1/ITK/RUNX1/IL6R
GO:0050671	GO:0050671	positive regulation of lymphocyte proliferation	96	0.586307	1.79422	0.00113122	0.0324345	0.0282278	3864	tags=31%, list=16%, signal=26%	GPR183/VCAM1/IGF1/IL23R/IL1B/HAVCR2/IL6/IL23A/TNFRSF4/CD74/IL12RB1/CD209/CD28/CD274/FOXP3/NFATC2/CD55/IL12B/CLCF1/MPL/ZAP70/TAC1/CHRNB2/TGFBR2/PTPRC/CORO1A/IL6R/IL4/FLT3LG/CD276
GO:0050729	GO:0050729	positive regulation of inflammatory response	98	0.601338	1.84341	0.00113122	0.0324345	0.0282278	3447	tags=29%, list=14%, signal=25%	SUCNR1/TLR7/IDO1/GBP5/IL1RL1/IL1B/IL6/CCR7/OSM/FABP4/IL23A/TGM2/TTBK1/CD28/ITGA2/CCL3/ETS1/PIK3CG/IL12B/TLR10/ITGAM/TAC1/FAM19A3/EGFR/TNF/NFKBIZ/MAPK13/SERPINE1
GO:0071347	GO:0071347	cellular response to interleukin-1	107	0.588578	1.82358	0.00113122	0.0324345	0.0282278	2737	tags=19%, list=11%, signal=17%	CXCL8/FGB/IL1RN/CCL20/IL1B/CCL2/CCL7/IL6/CCL4/CCL3/HAS2/NFKB1/PTGIS/ZC3H12A/ICAM1/IL1R2/IRAK3/GBP1/ST18/IRAK2
GO:1902107	GO:1902107	positive regulation of leukocyte differentiation	120	0.594553	1.85152	0.00113122	0.0324345	0.0282278	4920	tags=37%, list=20%, signal=29%	DCSTAMP/IFNG/GPR68/IL23R/POU4F2/TOX/VNN1/CCR1/IL23A/IL34/CD74/EVI2B/IL12RB1/KITLG/CD83/IL7R/FOXP3/RUNX3/IL4R/LIF/NLRP3/KLF10/TRIB1/IL12B/ID2/CBFB/ZAP70/TGFBR2/BTN2A2/TNF/NFKBIZ/PTPRC/RUNX1/IL4/FLT3LG/RASGRP1/ZFP36L1/LEF1/RARA/PPP2R3C/TGFB1/NFKBID/FADD/ZMIZ1
GO:0002526	GO:0002526	acute inflammatory response	99	0.552489	1.69419	0.0011325	0.0324345	0.0282278	4384	tags=33%, list=18%, signal=27%	VCAM1/IL1B/CPN2/CRP/IL6/F3/VNN1/VTN/CCR7/OSM/C5AR2/SAA2/ITIH4/SERPINA3/TREM1/NLRP3/PIK3CG/A2M/CD55/ICAM1/TAC1/CD59/TNF/FN1/IL6R/C4A/SUSD4/SERPINA1/FCER1G/CFP/SAA1/CEBPB/B4GALT1
GO:0006334	GO:0006334	nucleosome assembly	104	0.574482	1.77261	0.0011325	0.0324345	0.0282278	4409	tags=30%, list=18%, signal=24%	HIST1H2BG/HIST1H1E/HIST1H2BC/HIST1H4D/HIST1H2BF/HIST1H2BM/HIST1H1T/HIST1H2BJ/HIST2H4B/HIST1H4H/HIST1H2BK/H1F0/HIST1H3A/HIST1H4J/HIST1H3H/HIST1H2BD/IPO4/HIST1H3B/H3F3B/HIST1H4E/H2BFS/HIST2H2BE/HIST4H4/TSPY26P/HIST1H2BE/HIST2H4A/H1FX/HIST1H2BL/BRD2/TSPYL2/GRWD1
GO:0033209	GO:0033209	tumor necrosis factor-mediated signaling pathway	102	0.551258	1.69742	0.0011325	0.0324345	0.0282278	3219	tags=23%, list=13%, signal=20%	BIRC3/TRAF1/AIM2/NR1H4/TNFSF14/CARD14/TNFSF15/HIST1H2BJ/TNFRSF18/TNFAIP3/TNFRSF4/TNFRSF11B/TNFRSF8/SPHK1/EDARADD/TNFRSF9/TNFRSF12A/TNFRSF1B/LTB/ST18/TRAF3/KRT18/TNF
GO:0050728	GO:0050728	negative regulation of inflammatory response	102	0.578457	1.78117	0.0011325	0.0324345	0.0282278	3919	tags=35%, list=16%, signal=30%	IL10/NT5E/NR1H4/CNR2/NLRC3/TNFAIP3/PROC/MEFV/WFDC1/GHRL/FOXP3/CD200R1/NFKB1/PTGIS/NLRP3/GPR17/ZC3H12A/CYP19A1/ETS1/PRKCD/IL12B/HGF/CDH5/PPARD/TNFRSF1B/IL1R2/MIR222/FAM19A3/TNFAIP6/MIR221/ACP5/PTPRC/SMAD3/METRNL/BCR/TNFRSF1A
GO:0051250	GO:0051250	negative regulation of lymphocyte activation	104	0.544415	1.67984	0.0011325	0.0324345	0.0282278	4764	tags=36%, list=20%, signal=29%	IL10/LILRB1/PLA2G2D/IDO1/HAVCR2/TBC1D10C/TNFAIP3/CD74/PTPN6/CD274/SDC4/FOXP3/RUNX3/FOXJ1/IL4R/ZC3H12A/TBX21/CTLA4/ID2/CBFB/TNFRSF21/LOXL3/INHBA/SPN/BTN2A2/IRF1/RUNX1/GAL/LAG3/RIPOR2/PTPN22/JAK3/CEBPB/PRKAR1A/LST1/TGFB1/NFKBID
GO:0070665	GO:0070665	positive regulation of leukocyte proliferation	99	0.585763	1.79622	0.0011325	0.0324345	0.0282278	3864	tags=31%, list=16%, signal=26%	GPR183/VCAM1/IGF1/IL23R/IL1B/HAVCR2/IL6/IL23A/TNFRSF4/CD74/IL12RB1/CD209/CD28/KITLG/CD274/FOXP3/NFATC2/CD55/IL12B/CLCF1/MPL/ZAP70/TAC1/CHRNB2/TGFBR2/PTPRC/CORO1A/IL6R/IL4/FLT3LG/CD276
GO:0097696	GO:0097696	STAT cascade	104	0.554255	1.7102	0.0011325	0.0324345	0.0282278	4265	tags=32%, list=18%, signal=26%	IFNG/CSF2/IL24/IGF1/IL23R/IFNE/CCL2/IL6/OSM/TNFRSF18/IL23A/CSF1R/BCL3/IL7R/PTK6/LIF/PECAM1/IL12B/CLCF1/DOT1L/MIR221/CNTF/PTPRC/SOCS2/IL6R/IL4/CRLF1/FER/STAMBP/TNFRSF1A/STAT5A/STAP2/JAK3
GO:0002706	GO:0002706	regulation of lymphocyte mediated immunity	118	0.567333	1.76399	0.00113379	0.0324345	0.0282278	4223	tags=27%, list=18%, signal=22%	IL10/LILRB1/SH2D1B/IL23R/IL1B/HAVCR2/IL6/IL23A/PTPN6/IL12RB1/SERPINB4/CD28/IL7R/FOXP3/FOXJ1/NLRP3/TBX21/RAET1E/IL12B/CLCF1/RAET1E/IL27RA/NCR3/IL18R1/TNF/PTPRC/IL4/PROKR1/RASGRP1/LAG3/FCER1G/CD96
GO:0045580	GO:0045580	regulation of T cell differentiation	110	0.541735	1.68099	0.00113379	0.0324345	0.0282278	4764	tags=37%, list=20%, signal=30%	IFNG/IL23R/VNN1/TNFRSF18/IL23A/CD74/PRDM1/IL12RB1/CD28/CD83/IL7R/FOXP3/RUNX3/IRF4/FOXJ1/IL4R/NFATC2/NLRP3/ZC3H12A/TBX21/IL12B/CTLA4/CBFB/ZAP70/LOXL3/TGFBR2/BTN2A2/SOX13/NFKBIZ/PTPRC/IRF1/RUNX1/IL4/ZEB1/SH3RF1/RASGRP1/JAK3/CARD11/RARA/TGFB1/NFKBID
GO:0050921	GO:0050921	positive regulation of chemotaxis	110	0.582253	1.80672	0.00113379	0.0324345	0.0282278	3673	tags=31%, list=15%, signal=26%	SUCNR1/CXCL8/CXCL10/CCR4/CCL7/TNFSF14/CMKLR1/IL6/F3/CCR7/CCR1/IL23A/S1PR1/CD74/THBS1/CCL4/ITGA2/PDGFB/CCL3/NRP1/S100A14/AZU1/RAC2/VEGFC/PDGFRB/FGF2/TMEM102/BMPR2/FGF18/SERPINE1/SLIT2/SMAD3/MET/IL6R
GO:1903555	GO:1903555	regulation of tumor necrosis factor superfamily cytokine production	108	0.538806	1.67013	0.00113379	0.0324345	0.0282278	3464	tags=28%, list=14%, signal=24%	IL10/LILRB1/IFNG/HAVCR2/NR1H4/NLRC3/IL23A/C5AR2/TNFAIP3/PTPN6/THBS1/BCL3/ERRFI1/TNFRSF8/CD274/GHRL/CCL3/FOXP3/CD36/AZU1/ZC3H12A/IL12B/CYBB/CX3CR1/IRAK3/SPN/ZBTB20/FOXP1/ACP5/PTPRC
GO:0001906	GO:0001906	cell killing	100	0.620656	1.90318	0.00113507	0.0324345	0.0282278	2822	tags=24%, list=12%, signal=21%	CXCL6/LILRB1/IFNG/IL23R/HAVCR2/PRF1/HIST1H2BJ/IL23A/HIST1H2BK/GZMB/PTPN6/IL12RB1/SERPINB4/HTN1/IL7R/HRG/AZU1/RAET1E/IL12B/ICAM1/RAET1E/HTN3/CHGA/NCR3
GO:0002687	GO:0002687	positive regulation of leukocyte migration	100	0.55853	1.71268	0.00113507	0.0324345	0.0282278	2589	tags=22%, list=11%, signal=20%	CXCL8/CXCL10/CCL20/CCL7/TNFSF14/CMKLR1/IL6/CCR7/CCR1/TNFRSF18/IL23A/CD74/THBS1/CCL4/KITLG/ITGA2/CCL3/S100A14/RAC2/VEGFC/ICAM1/TMEM102
GO:0007259	GO:0007259	JAK-STAT cascade	100	0.552851	1.69526	0.00113507	0.0324345	0.0282278	4265	tags=32%, list=18%, signal=26%	IFNG/CSF2/IL24/IGF1/IL23R/IFNE/CCL2/IL6/OSM/TNFRSF18/IL23A/CSF1R/BCL3/PTK6/LIF/PECAM1/IL12B/CLCF1/DOT1L/MIR221/CNTF/PTPRC/SOCS2/IL6R/IL4/CRLF1/FER/STAMBP/TNFRSF1A/STAT5A/STAP2/JAK3
GO:0032675	GO:0032675	regulation of interleukin-6 production	100	0.547897	1.68007	0.00113507	0.0324345	0.0282278	2592	tags=23%, list=11%, signal=21%	IL10/TLR7/IL1RN/EREG/IL1B/HAVCR2/NR1H4/IL6/NLRC3/C5AR2/TNFAIP3/IL36B/PTPN6/PAEP/GHRL/FOXP3/CD200R1/FOXJ1/CD36/ZC3H12A/HGF/MBP/IRAK3
GO:0032946	GO:0032946	positive regulation of mononuclear cell proliferation	97	0.582989	1.78696	0.00113507	0.0324345	0.0282278	3864	tags=31%, list=16%, signal=26%	GPR183/VCAM1/IGF1/IL23R/IL1B/HAVCR2/IL6/IL23A/TNFRSF4/CD74/IL12RB1/CD209/CD28/CD274/FOXP3/NFATC2/CD55/IL12B/CLCF1/MPL/ZAP70/TAC1/CHRNB2/TGFBR2/PTPRC/CORO1A/IL6R/IL4/FLT3LG/CD276
GO:0038061	GO:0038061	NIK/NF-kappaB signaling	100	0.55378	1.69811	0.00113507	0.0324345	0.0282278	3219	tags=23%, list=13%, signal=20%	TLR7/BIRC3/IL1B/TCIM/HAVCR2/TNFSF14/CARD14/NLRC3/TNFSF15/IL23A/RELB/BCL3/SPHK1/NLRP3/ZC3H12A/NFKB2/IL12B/IKBKE/GREM1/EGFR/IL18R1/CARD10/TNF
GO:0045471	GO:0045471	response to ethanol	100	0.531938	1.63113	0.00113507	0.0324345	0.0282278	3105	tags=20%, list=13%, signal=17%	CSF3/VCAM1/RGS4/CCL7/RGS2/GRIN2A/TH/ACTC1/SLC2A4/NPPC/MAOB/KCNMB1/CDO1/ICAM1/CYBB/CLDN1/ABAT/CYP2E1/CHRNB2/DRD4
GO:0050777	GO:0050777	negative regulation of immune response	100	0.59779	1.83306	0.00113507	0.0324345	0.0282278	3856	tags=31%, list=16%, signal=26%	IL10/OTOP1/LILRB1/IL1RL1/HAVCR2/NLRC3/ALOX15/TNFAIP3/PTPN6/SERPINB4/AMBP/IL7R/FOXP3/FOXJ1/FCRLB/IL4R/GPR17/ZC3H12A/TBX21/A2M/CD55/IL12B/LOXL3/IRAK3/IL27RA/CD59/TNF/PTPRC/BCR/DRD2/FER
GO:0061041	GO:0061041	regulation of wound healing	105	0.5998	1.84968	0.00113636	0.0324345	0.0282278	3138	tags=28%, list=13%, signal=24%	SERPINB2/FGB/EPPK1/F3/PLEK/VTN/TNFAIP3/PROC/PLAU/TEC/FOXC2/THBS1/WFDC1/PDGFB/HBEGF/THBD/PLAUR/CD36/HRG/PRKCD/ADTRP/PPARD/TNFRSF12A/FGF2/ABAT/PHLDB2/SOX15/MIR221/TGFBR2
GO:2001237	GO:2001237	negative regulation of extrinsic apoptotic signaling pathway	91	0.551577	1.67785	0.00113636	0.0324345	0.0282278	5046	tags=32%, list=21%, signal=25%	FGB/GDNF/FASLG/CSF2/IGF1/IL1B/TNFAIP3/TNFRSF4/THBS1/COL2A1/NRP1/HGF/ICAM1/MIR222/SNAI2/MCL1/MIR221/TNF/SERPINE1/ITGA6/SH3RF1/GCLM/TERT/ARHGEF2/BMP5/IL1A/FADD/ITGAV/CX3CL1
GO:0071706	GO:0071706	tumor necrosis factor superfamily cytokine production	111	0.535728	1.66275	0.00113766	0.0324345	0.0282278	4481	tags=33%, list=19%, signal=27%	IL10/LILRB1/IFNG/HAVCR2/NR1H4/NLRC3/IL23A/C5AR2/TNFAIP3/PTPN6/THBS1/BCL3/ERRFI1/TNFRSF8/CD274/GHRL/CCL3/FOXP3/CD36/AZU1/ZC3H12A/IL12B/CYBB/CX3CR1/IRAK3/SPN/ZBTB20/FOXP1/ACP5/PTPRC/RASGRP1/TLR1/FCER1G/PTPN22/ARHGEF2/BCL10/RARA
GO:0097530	GO:0097530	granulocyte migration	92	0.677948	2.06339	0.00113766	0.0324345	0.0282278	2105	tags=30%, list=9%, signal=28%	CXCL6/CXCL8/IL1RN/CXCL10/CCL20/IL1B/CXCL3/CCL2/CCL7/CMKLR1/CCR7/CXCL5/IL23A/C5AR2/PDE4D/ADGRE2/CD74/IL36B/PDE4B/THBS1/CCL4/CCL3/CXCL11/PIK3CD/S100A14/PECAM1/PIK3CG/RAC2
GO:1903038	GO:1903038	negative regulation of leukocyte cell-cell adhesion	92	0.542857	1.65223	0.00113766	0.0324345	0.0282278	4764	tags=37%, list=20%, signal=30%	IL10/LILRB1/PLA2G2D/IDO1/HAVCR2/CD74/PTPN6/CD274/SDC4/FOXP3/RUNX3/FOXJ1/IL4R/ZC3H12A/TBX21/ADTRP/CTLA4/CBFB/TNFRSF21/LOXL3/MIR222/SPN/MIR221/BTN2A2/IRF1/RUNX1/LAG3/RIPOR2/PTPN22/JAK3/CEBPB/PRKAR1A/TGFB1/NFKBID
GO:1904892	GO:1904892	regulation of STAT cascade	90	0.566722	1.71864	0.00114416	0.0324345	0.0282278	4265	tags=32%, list=18%, signal=27%	IFNG/CSF2/IL24/IGF1/IL23R/IFNE/IL6/OSM/TNFRSF18/IL23A/CSF1R/BCL3/IL7R/PTK6/LIF/PECAM1/IL12B/CLCF1/DOT1L/MIR221/CNTF/PTPRC/SOCS2/IL6R/IL4/CRLF1/TNFRSF1A/STAP2/JAK3
GO:0002688	GO:0002688	regulation of leukocyte chemotaxis	88	0.558236	1.6942	0.00114811	0.0324345	0.0282278	2662	tags=24%, list=11%, signal=21%	CXCL8/CXCL10/CCL2/CCL7/TNFSF14/CMKLR1/IL6/CCR7/CCR1/IL23A/C5AR2/CD74/THBS1/CCL4/CCL3/S100A14/CYP19A1/RAC2/VEGFC/TMEM102/GREM1
GO:0042107	GO:0042107	cytokine metabolic process	88	0.599559	1.81961	0.00114811	0.0324345	0.0282278	4559	tags=44%, list=19%, signal=36%	IL10/TLR7/LILRB1/EREG/IL1B/IL6/TNFSF15/THBS1/BCL3/ERRFI1/CD28/TNFRSF8/GHRL/FOXP3/IRF4/FOXJ1/INHBB/MAP2K3/NFKB1/AZU1/IL12B/CYBB/CX3CR1/LTB/INHBA/SPN/TNF/RNF128/PTPRC/IRF1/IL4/CD276/TLR1/LAG3/ASB1/CARD11/CEBPB/BCL10/IL1RAP
GO:0042089	GO:0042089	cytokine biosynthetic process	87	0.593297	1.79816	0.00115207	0.0324345	0.0282278	4559	tags=44%, list=19%, signal=36%	IL10/TLR7/LILRB1/EREG/IL1B/IL6/THBS1/BCL3/ERRFI1/CD28/TNFRSF8/GHRL/FOXP3/IRF4/FOXJ1/INHBB/MAP2K3/NFKB1/AZU1/IL12B/CYBB/CX3CR1/LTB/INHBA/SPN/TNF/RNF128/PTPRC/IRF1/IL4/CD276/TLR1/LAG3/ASB1/CARD11/CEBPB/BCL10/IL1RAP
GO:0030316	GO:0030316	osteoclast differentiation	82	0.639465	1.92793	0.00116414	0.0324345	0.0282278	2151	tags=21%, list=9%, signal=19%	DCSTAMP/GPR183/LILRB1/IFNG/GPR68/IL23R/POU4F2/SIGLEC15/CCR1/IL23A/CSF1R/CCL3/JUNB/MAFB/KLF10/IL12B/GPR55
GO:0071621	GO:0071621	granulocyte chemotaxis	82	0.693712	2.09149	0.00116414	0.0324345	0.0282278	2105	tags=33%, list=9%, signal=30%	CXCL6/CXCL8/IL1RN/CXCL10/CCL20/IL1B/CXCL3/CCL2/CCL7/CMKLR1/CCR7/CXCL5/IL23A/C5AR2/PDE4D/ADGRE2/CD74/IL36B/PDE4B/THBS1/CCL4/CCL3/CXCL11/PIK3CD/S100A14/PIK3CG/RAC2
GO:0001909	GO:0001909	leukocyte mediated cytotoxicity	81	0.590129	1.77688	0.00116822	0.0324345	0.0282278	2822	tags=21%, list=12%, signal=19%	CXCL6/LILRB1/IL23R/HAVCR2/PRF1/IL23A/GZMB/PTPN6/IL12RB1/SERPINB4/IL7R/AZU1/RAET1E/IL12B/ICAM1/RAET1E/NCR3
GO:0031424	GO:0031424	keratinization	81	0.688258	2.07235	0.00116822	0.0324345	0.0282278	2339	tags=37%, list=10%, signal=34%	KRTAP13-2/KRT23/KRT39/KRT20/KRT6A/KRT4/KRT33A/KRT73/KRT12/KRT78/LIPK/LOR/KRT79/KRT34/KRTAP2-3/SPRR2D/KRT33B/KLK13/TGM3/KRT5/KRT75/DSP/KRT17/KRTAP5-9/KRT9/IVL/CDH3/KRT71/ST14/SPINK6
GO:0045639	GO:0045639	positive regulation of myeloid cell differentiation	81	0.651956	1.96304	0.00116822	0.0324345	0.0282278	4145	tags=36%, list=17%, signal=30%	CSF3/DCSTAMP/IFNG/GPR68/IL23R/POU4F2/CCR1/IL23A/IL34/CD74/EVI2B/KITLG/LIF/KLF10/TRIB1/ETS1/IL12B/ID2/MPL/MIR222/INHBA/MIR221/TNF/RUNX1/ZNF16/TAL1/ZFP36L1/LEF1/JAG1
GO:0046632	GO:0046632	alpha-beta T cell differentiation	81	0.671616	2.02224	0.00116822	0.0324345	0.0282278	3651	tags=41%, list=15%, signal=35%	GPR183/PLA2G2D/IFNG/SEMA4A/IL23R/IL6/IL23A/TCF7/RELB/PRDM1/IL12RB1/BCL3/CD83/FOXP3/RUNX3/IRF4/IL4R/NLRP3/ZC3H12A/RORC/TBX21/IL12B/CBFB/ZAP70/LOXL3/SPN/IL18R1/TGFBR2/FOXP1/NFKBIZ/IRF1/ITK/RUNX1
GO:0050868	GO:0050868	negative regulation of T cell activation	81	0.572993	1.72528	0.00116822	0.0324345	0.0282278	4764	tags=38%, list=20%, signal=31%	IL10/LILRB1/PLA2G2D/IDO1/HAVCR2/CD74/PTPN6/CD274/SDC4/FOXP3/RUNX3/FOXJ1/IL4R/ZC3H12A/TBX21/CTLA4/CBFB/TNFRSF21/LOXL3/SPN/BTN2A2/IRF1/RUNX1/LAG3/RIPOR2/PTPN22/JAK3/CEBPB/PRKAR1A/TGFB1/NFKBID
GO:0032609	GO:0032609	interferon-gamma production	80	0.618118	1.85395	0.00117925	0.0324345	0.0282278	4253	tags=36%, list=18%, signal=30%	IL10/TLR7/LILRB1/IL1RL1/IL23R/IL1B/HAVCR2/NR1H4/CCR7/IL23A/PDE4D/PDE4B/IL12RB1/BCL3/CD274/FOXP3/ZC3H12A/IL12B/IL27RA/INHBA/SPN/IL18R1/TNF/ITK/IL6R/CD276/RASGRP1/CD96/PTPN22
GO:0042035	GO:0042035	regulation of cytokine biosynthetic process	80	0.603453	1.80997	0.00117925	0.0324345	0.0282278	4473	tags=45%, list=19%, signal=37%	IL10/TLR7/LILRB1/EREG/IL1B/IL6/THBS1/BCL3/ERRFI1/CD28/TNFRSF8/GHRL/FOXP3/IRF4/FOXJ1/INHBB/MAP2K3/NFKB1/AZU1/IL12B/CYBB/CX3CR1/LTB/INHBA/SPN/TNF/RNF128/PTPRC/IRF1/CD276/TLR1/LAG3/ASB1/CARD11/CEBPB/BCL10
GO:0035710	GO:0035710	CD4-positive, alpha-beta T cell activation	73	0.683649	2.02463	0.00119904	0.0324345	0.0282278	3404	tags=40%, list=14%, signal=34%	GPR183/PLA2G2D/IFNG/SEMA4A/IL23R/IL6/IL23A/RELB/IL12RB1/BCL3/CD274/CD83/FOXP3/RUNX3/IRF4/IL4R/NLRP3/ZC3H12A/RORC/TBX21/CD55/IL12B/CBFB/LOXL3/SPN/IL18R1/TGFBR2/FOXP1/NFKBIZ
GO:0046634	GO:0046634	regulation of alpha-beta T cell activation	74	0.601824	1.78442	0.00119904	0.0324345	0.0282278	3859	tags=38%, list=16%, signal=32%	LILRB1/IFNG/IL23R/IL23A/PRDM1/IL12RB1/CD28/CD274/CD83/FOXP3/RUNX3/IRF4/IL4R/NLRP3/ZC3H12A/TBX21/CD55/IL12B/CBFB/ZAP70/LOXL3/TGFBR2/NFKBIZ/PTPRC/IRF1/RUNX1/IL6R/SH3RF1
GO:1990266	GO:1990266	neutrophil migration	74	0.69867	2.07157	0.00119904	0.0324345	0.0282278	2105	tags=32%, list=9%, signal=30%	CXCL6/CXCL8/IL1RN/CXCL10/CCL20/IL1B/CXCL3/CCL2/CCL7/CCR7/CXCL5/IL23A/C5AR2/PDE4D/CD74/IL36B/PDE4B/CCL4/CCL3/CXCL11/PIK3CD/PECAM1/PIK3CG/RAC2
GO:0050818	GO:0050818	regulation of coagulation	67	0.620282	1.81505	0.00120627	0.0324345	0.0282278	2180	tags=24%, list=9%, signal=22%	SERPINB2/FGB/F3/PLEK/VTN/PROC/PLAU/TEC/THBS1/PDGFB/THBD/PLAUR/CD36/HRG/PRKCD/ADTRP
GO:1903035	GO:1903035	negative regulation of response to wounding	67	0.621546	1.81874	0.00120627	0.0324345	0.0282278	2669	tags=27%, list=11%, signal=24%	SERPINB2/FGB/EPPK1/VTN/PROC/PLAU/THBS1/WFDC1/EPHA4/PDGFB/THBD/PLAUR/HRG/PRKCD/ADTRP/FGF2/ABAT/PHLDB2
GO:0032602	GO:0032602	chemokine production	66	0.608037	1.77561	0.00120919	0.0324345	0.0282278	1075	tags=18%, list=4%, signal=17%	IL10/TLR7/CXCL6/IL1RL1/IL1B/HAVCR2/NR1H4/IL6/CSF1R/CD74/POSTN/MEFV
GO:0032612	GO:0032612	interleukin-1 production	71	0.603089	1.77329	0.00120919	0.0324345	0.0282278	2501	tags=27%, list=10%, signal=24%	IL10/SUCNR1/GBP5/AIM2/HAVCR2/NR1H4/CCR7/TNFAIP3/MEFV/ERRFI1/GHRL/SPHK1/CCL3/CD36/NLRP3/AZU1/ZC3H12A/IL1R2/CX3CR1
GO:0032649	GO:0032649	regulation of interferon-gamma production	71	0.63714	1.87341	0.00120919	0.0324345	0.0282278	2108	tags=25%, list=9%, signal=23%	IL10/TLR7/LILRB1/IL1RL1/IL23R/IL1B/HAVCR2/NR1H4/CCR7/IL23A/PDE4D/PDE4B/IL12RB1/BCL3/CD274/FOXP3/ZC3H12A/IL12B
GO:0070268	GO:0070268	cornification	66	0.687418	2.00742	0.00120919	0.0324345	0.0282278	3525	tags=47%, list=15%, signal=40%	KRT23/KRT39/KRT20/KRT6A/KRT4/KRT33A/KRT73/KRT12/KRT78/LIPK/LOR/KRT79/KRT34/SPRR2D/KRT33B/KLK13/KRT5/KRT75/DSP/KRT17/KRT9/IVL/KRT71/ST14/SPINK6/KRT7/CDSN/KRT18/EVPL/KRT15/KRT19
GO:0072676	GO:0072676	lymphocyte migration	71	0.65357	1.92172	0.00120919	0.0324345	0.0282278	2873	tags=31%, list=12%, signal=27%	CXCR3/GPR183/CXCL10/CCL20/CCL2/CCL7/TNFSF14/CCR7/S1PR1/MYO1G/CCL4/CCL3/CD200R1/CXCL11/PIK3CD/TBX21/PIK3CG/ADTRP/ICAM1/ZAP70/TMEM102/SPN
GO:0002286	GO:0002286	T cell activation involved in immune response	68	0.711836	2.08674	0.00121065	0.0324345	0.0282278	3404	tags=40%, list=14%, signal=34%	GPR183/LILRB1/IFNG/SEMA4A/IL23R/IFNE/HAVCR2/IL6/IL23A/RELB/IL12RB1/BCL3/LCP1/FOXP3/IRF4/IL4R/NLRP3/ZC3H12A/RORC/TBX21/IL12B/ICAM1/LOXL3/SPN/IL18R1/FOXP1/NFKBIZ
GO:0042102	GO:0042102	positive regulation of T cell proliferation	68	0.60838	1.78346	0.00121065	0.0324345	0.0282278	4983	tags=40%, list=21%, signal=32%	VCAM1/IGF1/IL23R/IL1B/HAVCR2/IL6/IL23A/IL12RB1/CD209/CD28/CD274/FOXP3/CD55/IL12B/ZAP70/TGFBR2/PTPRC/CORO1A/IL6R/IL4/CD276/JAK3/CARD11/SPTA1/FADD/PDCD1LG2/HES1
GO:0030193	GO:0030193	regulation of blood coagulation	64	0.625255	1.82251	0.00121359	0.0324345	0.0282278	2180	tags=25%, list=9%, signal=23%	SERPINB2/FGB/F3/PLEK/VTN/PROC/PLAU/TEC/THBS1/PDGFB/THBD/PLAUR/CD36/HRG/PRKCD/ADTRP
GO:1900046	GO:1900046	regulation of hemostasis	64	0.625255	1.82251	0.00121359	0.0324345	0.0282278	2180	tags=25%, list=9%, signal=23%	SERPINB2/FGB/F3/PLEK/VTN/PROC/PLAU/TEC/THBS1/PDGFB/THBD/PLAUR/CD36/HRG/PRKCD/ADTRP
GO:0007260	GO:0007260	tyrosine phosphorylation of STAT protein	60	0.609512	1.76158	0.00121655	0.0324345	0.0282278	4265	tags=40%, list=18%, signal=33%	IFNG/CSF2/IL24/IGF1/IL23R/IL6/OSM/TNFRSF18/IL23A/CSF1R/PTK6/LIF/PECAM1/IL12B/CLCF1/MIR221/CNTF/IL6R/IL4/CRLF1/FER/TNFRSF1A/STAP2/JAK3
GO:0030593	GO:0030593	neutrophil chemotaxis	65	0.717121	2.08855	0.00121655	0.0324345	0.0282278	2388	tags=37%, list=10%, signal=33%	CXCL6/CXCL8/IL1RN/CXCL10/CCL20/IL1B/CXCL3/CCL2/CCL7/CCR7/CXCL5/IL23A/C5AR2/PDE4D/CD74/IL36B/PDE4B/CCL4/CCL3/CXCL11/PIK3CD/PIK3CG/RAC2/CXCL9
GO:0031341	GO:0031341	regulation of cell killing	65	0.610178	1.77709	0.00121655	0.0324345	0.0282278	2822	tags=23%, list=12%, signal=20%	CXCL6/LILRB1/IFNG/IL23R/HAVCR2/PRF1/IL23A/IL12RB1/SERPINB4/IL7R/RAET1E/IL12B/ICAM1/RAET1E/NCR3
GO:0061045	GO:0061045	negative regulation of wound healing	58	0.668764	1.92555	0.00121803	0.0324345	0.0282278	2669	tags=29%, list=11%, signal=26%	SERPINB2/FGB/EPPK1/VTN/PROC/PLAU/THBS1/WFDC1/PDGFB/THBD/PLAUR/HRG/PRKCD/ADTRP/FGF2/ABAT/PHLDB2
GO:1990868	GO:1990868	response to chemokine	58	0.711951	2.0499	0.00121803	0.0324345	0.0282278	2501	tags=40%, list=10%, signal=36%	CXCR3/CXCL6/CXCL8/CXCL10/CCR4/CCL20/CXCL3/CCL2/CCL7/CMKLR1/CCR7/CXCL5/CCR1/CCRL2/CCL4/CCL3/CXCL11/GPR17/ZC3H12A/SLIT3/MPL/CXCL9/CX3CR1
GO:1990869	GO:1990869	cellular response to chemokine	58	0.711951	2.0499	0.00121803	0.0324345	0.0282278	2501	tags=40%, list=10%, signal=36%	CXCR3/CXCL6/CXCL8/CXCL10/CCR4/CCL20/CXCL3/CCL2/CCL7/CMKLR1/CCR7/CXCL5/CCR1/CCRL2/CCL4/CCL3/CXCL11/GPR17/ZC3H12A/SLIT3/MPL/CXCL9/CX3CR1
GO:0032642	GO:0032642	regulation of chemokine production	62	0.618195	1.79424	0.00121951	0.0324345	0.0282278	1964	tags=23%, list=8%, signal=21%	IL10/TLR7/CXCL6/IL1RL1/IL1B/HAVCR2/NR1H4/IL6/CSF1R/CD74/POSTN/MEFV/IL4R/AZU1
GO:0042116	GO:0042116	macrophage activation	62	0.65676	1.90617	0.00121951	0.0324345	0.0282278	3681	tags=34%, list=15%, signal=29%	IL10/SUCNR1/TLR7/CSF2/IL1RL1/HAVCR2/CD74/THBS1/TTBK1/CD93/IL4R/AZU1/ZC3H12A/ITGAM/NAMPT/ADGRF5/FAM19A3/TNF/FOXP1/PTPRC/SBNO2
GO:1904894	GO:1904894	positive regulation of STAT cascade	62	0.611869	1.77588	0.00121951	0.0324345	0.0282278	2146	tags=26%, list=9%, signal=24%	IFNG/CSF2/IL24/IGF1/IL23R/IL6/OSM/TNFRSF18/IL23A/CSF1R/IL7R/PTK6/LIF/PECAM1/IL12B/CLCF1
GO:0043367	GO:0043367	CD4-positive, alpha-beta T cell differentiation	61	0.714956	2.06433	0.001221	0.0324345	0.0282278	4265	tags=49%, list=18%, signal=41%	GPR183/PLA2G2D/IFNG/SEMA4A/IL23R/IL6/IL23A/RELB/IL12RB1/BCL3/CD83/FOXP3/RUNX3/IRF4/IL4R/NLRP3/ZC3H12A/RORC/TBX21/IL12B/CBFB/LOXL3/SPN/IL18R1/FOXP1/NFKBIZ/RUNX1/SH3RF1/LEF1/JAK3
GO:0002690	GO:0002690	positive regulation of leukocyte chemotaxis	69	0.589189	1.72212	0.00122399	0.0324345	0.0282278	2589	tags=25%, list=11%, signal=22%	CXCL8/CXCL10/CCL7/TNFSF14/CMKLR1/IL6/CCR7/CCR1/IL23A/CD74/THBS1/CCL4/CCL3/S100A14/RAC2/VEGFC/TMEM102
GO:0030101	GO:0030101	natural killer cell activation	54	0.635811	1.80232	0.00123609	0.0324345	0.0282278	4253	tags=35%, list=18%, signal=29%	IL23R/IFNE/HAVCR2/TOX/IL23A/PRDM1/PIK3CD/RAET1E/IL12B/ID2/RAET1E/NCR3/IL18R1/PTPRC/CORO1A/IL6R/FLT3LG/RASGRP1/PTPN22
GO:0034113	GO:0034113	heterotypic cell-cell adhesion	54	0.616859	1.7486	0.00123609	0.0324345	0.0282278	3770	tags=31%, list=16%, signal=27%	IL10/FGB/IL1RN/IL1B/ALOX15/LCK/CD200R1/DSP/ITGB3/ITGAD/MBP/MYADM/CD44/MIR221/TNF/PTPRC/SKAP1
GO:0071674	GO:0071674	mononuclear cell migration	54	0.633281	1.79515	0.00123609	0.0324345	0.0282278	1837	tags=24%, list=8%, signal=22%	CXCL10/CCL20/CCL2/CCL7/CMKLR1/IL6/CCR1/FLT1/THBS1/CCL4/PDGFB/CCL3/S100A14
GO:0032623	GO:0032623	interleukin-2 production	55	0.611576	1.73868	0.00123916	0.0324345	0.0282278	4783	tags=38%, list=20%, signal=31%	IL1B/HAVCR2/NR1H4/PDE4D/TNFAIP3/PDE4B/CD28/CD83/FOXP3/IRF4/NAV3/TBX21/GBP1/EZR/PTPRC/RUNX1/LAG3/FCER1G/CARD11/IL1RAP/IL1A
GO:0002292	GO:0002292	T cell differentiation involved in immune response	53	0.719981	2.03229	0.00124378	0.0324345	0.0282278	3404	tags=42%, list=14%, signal=36%	GPR183/IFNG/SEMA4A/IL23R/IL6/IL23A/RELB/IL12RB1/BCL3/FOXP3/IRF4/IL4R/NLRP3/ZC3H12A/RORC/TBX21/IL12B/LOXL3/SPN/IL18R1/FOXP1/NFKBIZ
GO:0051057	GO:0051057	positive regulation of small GTPase mediated signal transduction	53	0.649661	1.83379	0.00124378	0.0324345	0.0282278	2788	tags=34%, list=12%, signal=30%	LPAR6/NTRK1/F2RL3/RELN/IGF1/GPR65/MMD2/KITLG/NRG1/DGKI/GPR17/GPR4/GPR55/ADGRG1/PDGFRB/NGF/PRAG1/RASGRF1
GO:0019730	GO:0019730	antimicrobial humoral response	52	0.780593	2.19549	0.00125471	0.0324345	0.0282278	2813	tags=46%, list=12%, signal=41%	HIST1H2BG/CXCL6/CXCL8/FGB/CXCL10/HIST1H2BC/CXCL3/KLK3/RNASE7/HIST1H2BF/DMBT1/CXCL5/HIST1H2BJ/HIST1H2BK/BCL3/HTN1/CXCL11/HRG/AZU1/CXCL9/H2BFS/HTN3/CHGA/HIST2H2BE
GO:0045670	GO:0045670	regulation of osteoclast differentiation	52	0.662923	1.86453	0.00125471	0.0324345	0.0282278	2151	tags=25%, list=9%, signal=23%	LILRB1/IFNG/GPR68/IL23R/POU4F2/SIGLEC15/CCR1/IL23A/CCL3/MAFB/KLF10/IL12B/GPR55
GO:0046637	GO:0046637	regulation of alpha-beta T cell differentiation	52	0.633268	1.78112	0.00125471	0.0324345	0.0282278	4764	tags=46%, list=20%, signal=37%	IFNG/IL23R/IL23A/PRDM1/IL12RB1/CD83/FOXP3/RUNX3/IRF4/IL4R/NLRP3/ZC3H12A/TBX21/IL12B/CBFB/ZAP70/LOXL3/TGFBR2/NFKBIZ/RUNX1/SH3RF1/JAK3/RARA/NFKBID
GO:0002709	GO:0002709	regulation of T cell mediated immunity	51	0.641994	1.80188	0.00126103	0.0324345	0.0282278	2108	tags=22%, list=9%, signal=20%	LILRB1/IL23R/IL1B/IL6/IL23A/IL12RB1/IL7R/FOXP3/NLRP3/TBX21/IL12B
GO:0070098	GO:0070098	chemokine-mediated signaling pathway	51	0.724088	2.03229	0.00126103	0.0324345	0.0282278	2501	tags=43%, list=10%, signal=39%	CXCR3/CXCL6/CXCL8/CXCL10/CCR4/CCL20/CXCL3/CCL2/CCL7/CMKLR1/CCR7/CXCL5/CCR1/CCRL2/CCL4/CCL3/CXCL11/GPR17/SLIT3/MPL/CXCL9/CX3CR1
GO:0002287	GO:0002287	alpha-beta T cell activation involved in immune response	50	0.733219	2.04806	0.00126422	0.0324345	0.0282278	3404	tags=44%, list=14%, signal=38%	GPR183/IFNG/SEMA4A/IL23R/IL6/IL23A/RELB/IL12RB1/BCL3/FOXP3/IRF4/IL4R/NLRP3/ZC3H12A/RORC/TBX21/IL12B/LOXL3/SPN/IL18R1/FOXP1/NFKBIZ
GO:0002293	GO:0002293	alpha-beta T cell differentiation involved in immune response	50	0.733219	2.04806	0.00126422	0.0324345	0.0282278	3404	tags=44%, list=14%, signal=38%	GPR183/IFNG/SEMA4A/IL23R/IL6/IL23A/RELB/IL12RB1/BCL3/FOXP3/IRF4/IL4R/NLRP3/ZC3H12A/RORC/TBX21/IL12B/LOXL3/SPN/IL18R1/FOXP1/NFKBIZ
GO:0002294	GO:0002294	CD4-positive, alpha-beta T cell differentiation involved in immune response	50	0.733219	2.04806	0.00126422	0.0324345	0.0282278	3404	tags=44%, list=14%, signal=38%	GPR183/IFNG/SEMA4A/IL23R/IL6/IL23A/RELB/IL12RB1/BCL3/FOXP3/IRF4/IL4R/NLRP3/ZC3H12A/RORC/TBX21/IL12B/LOXL3/SPN/IL18R1/FOXP1/NFKBIZ
GO:0050710	GO:0050710	negative regulation of cytokine secretion	50	0.631312	1.76341	0.00126422	0.0324345	0.0282278	3294	tags=38%, list=14%, signal=33%	IL10/LILRB1/NR1H4/C5AR2/TNFAIP3/TNFRSF4/GHRL/FOXP3/CD200R1/NLRP3/ZC3H12A/TNFRSF21/IL1R2/GBP1/SSC5D/EZR/BTN2A2/TNF/FN1
GO:0032768	GO:0032768	regulation of monooxygenase activity	49	0.656338	1.83047	0.00126743	0.0324345	0.0282278	1842	tags=18%, list=8%, signal=17%	GDNF/IFNG/IL1B/NPR3/CNR2/S100A1/NOSTRIN/NFKB1/CDH3
GO:0042093	GO:0042093	T-helper cell differentiation	48	0.728349	2.00881	0.00129366	0.0324345	0.0282278	3404	tags=44%, list=14%, signal=38%	GPR183/SEMA4A/IL23R/IL6/IL23A/RELB/IL12RB1/BCL3/FOXP3/IRF4/IL4R/NLRP3/ZC3H12A/RORC/TBX21/IL12B/LOXL3/SPN/IL18R1/FOXP1/NFKBIZ
GO:2000514	GO:2000514	regulation of CD4-positive, alpha-beta T cell activation	48	0.654193	1.80428	0.00129366	0.0324345	0.0282278	4764	tags=50%, list=20%, signal=40%	IFNG/IL23R/IL23A/IL12RB1/CD274/CD83/FOXP3/RUNX3/IRF4/IL4R/NLRP3/ZC3H12A/TBX21/CD55/IL12B/CBFB/LOXL3/TGFBR2/NFKBIZ/RUNX1/SH3RF1/JAK3/RARA/NFKBID
GO:0070671	GO:0070671	response to interleukin-12	46	0.688079	1.88328	0.00130378	0.0324345	0.0282278	2108	tags=15%, list=9%, signal=14%	SERPINB2/IL10/IFNG/IL12RB1/LCP1/MTAP/IL12B
GO:0002763	GO:0002763	positive regulation of myeloid leukocyte differentiation	45	0.764325	2.08205	0.00131926	0.0324345	0.0282278	2256	tags=36%, list=9%, signal=32%	DCSTAMP/IFNG/GPR68/IL23R/POU4F2/CCR1/IL23A/IL34/CD74/EVI2B/KITLG/LIF/KLF10/TRIB1/IL12B/ID2
GO:0071349	GO:0071349	cellular response to interleukin-12	45	0.690271	1.88032	0.00131926	0.0324345	0.0282278	2108	tags=16%, list=9%, signal=14%	SERPINB2/IL10/IFNG/IL12RB1/LCP1/MTAP/IL12B
GO:0032720	GO:0032720	negative regulation of tumor necrosis factor production	41	0.686026	1.85295	0.0013245	0.0324345	0.0282278	1972	tags=32%, list=8%, signal=29%	IL10/LILRB1/HAVCR2/NR1H4/NLRC3/C5AR2/TNFAIP3/PTPN6/BCL3/ERRFI1/GHRL/FOXP3/ZC3H12A
GO:0032615	GO:0032615	interleukin-12 production	43	0.713636	1.93542	0.00132802	0.0324345	0.0282278	3532	tags=44%, list=15%, signal=38%	IL10/LILRB1/IFNG/IDO1/IL23R/CMKLR1/CCR7/IL23A/MEFV/THBS1/NFKB1/CD36/PRKCD/IL12B/IRAK3/LTB/FOXP1/ACP5/IRF1
GO:0035722	GO:0035722	interleukin-12-mediated signaling pathway	43	0.703387	1.90762	0.00132802	0.0324345	0.0282278	2108	tags=16%, list=9%, signal=15%	SERPINB2/IL10/IFNG/IL12RB1/LCP1/MTAP/IL12B
GO:0050830	GO:0050830	defense response to Gram-positive bacterium	44	0.683826	1.85781	0.00132802	0.0324345	0.0282278	3592	tags=45%, list=15%, signal=39%	HIST1H2BG/HAVCR2/HIST1H2BC/RNASE7/CRP/HIST1H2BF/IL6/DMBT1/HIST1H2BJ/HIST1H2BK/CD36/NLRP3/H2BFS/IL27RA/CHGA/HIST2H2BE/SSC5D/TNF/ACP5/HIST1H2BE
GO:0072678	GO:0072678	T cell migration	44	0.73276	1.99075	0.00132802	0.0324345	0.0282278	2873	tags=39%, list=12%, signal=34%	CXCR3/GPR183/CXCL10/CCL20/CCL2/TNFSF14/S1PR1/MYO1G/CCL3/CD200R1/CXCL11/PIK3CD/PIK3CG/ICAM1/ZAP70/TMEM102/SPN
GO:1903556	GO:1903556	negative regulation of tumor necrosis factor superfamily cytokine production	43	0.687632	1.86489	0.00132802	0.0324345	0.0282278	1972	tags=33%, list=8%, signal=30%	IL10/LILRB1/HAVCR2/NR1H4/NLRC3/C5AR2/TNFAIP3/PTPN6/BCL3/ERRFI1/CD274/GHRL/FOXP3/ZC3H12A
GO:0032655	GO:0032655	regulation of interleukin-12 production	42	0.710702	1.91805	0.00133511	0.0324345	0.0282278	3532	tags=43%, list=15%, signal=37%	IL10/LILRB1/IFNG/IDO1/IL23R/CMKLR1/CCR7/IL23A/MEFV/THBS1/NFKB1/CD36/IL12B/IRAK3/LTB/FOXP1/ACP5/IRF1
GO:0032653	GO:0032653	regulation of interleukin-10 production	37	0.712361	1.89074	0.00135135	0.0324345	0.0282278	2452	tags=35%, list=10%, signal=32%	LILRB1/IDO1/IL23R/IL23A/BCL3/CD28/CD274/CD83/FOXP3/IRF4/IL12B/HGF/TNFRSF21
GO:0032613	GO:0032613	interleukin-10 production	39	0.714256	1.90948	0.00135318	0.0324345	0.0282278	2452	tags=36%, list=10%, signal=32%	LILRB1/IDO1/IL23R/IL23A/BCL3/CD28/CD274/CD83/FOXP3/IRF4/PRKCD/IL12B/HGF/TNFRSF21
GO:0043370	GO:0043370	regulation of CD4-positive, alpha-beta T cell differentiation	39	0.702668	1.8785	0.00135318	0.0324345	0.0282278	4764	tags=54%, list=20%, signal=43%	IFNG/IL23R/IL23A/IL12RB1/CD83/FOXP3/RUNX3/IRF4/IL4R/NLRP3/ZC3H12A/TBX21/IL12B/CBFB/LOXL3/NFKBIZ/RUNX1/SH3RF1/JAK3/RARA/NFKBID
GO:0045824	GO:0045824	negative regulation of innate immune response	39	0.635317	1.69844	0.00135318	0.0324345	0.0282278	2592	tags=21%, list=11%, signal=18%	OTOP1/LILRB1/HAVCR2/NLRC3/TNFAIP3/SERPINB4/A2M/IRAK3
GO:0046638	GO:0046638	positive regulation of alpha-beta T cell differentiation	39	0.642105	1.71659	0.00135318	0.0324345	0.0282278	3651	tags=38%, list=15%, signal=33%	IFNG/IL23R/IL23A/IL12RB1/CD83/FOXP3/RUNX3/IL4R/NLRP3/IL12B/CBFB/ZAP70/TGFBR2/NFKBIZ/RUNX1
GO:0042088	GO:0042088	T-helper 1 type immune response	36	0.719912	1.90506	0.0013587	0.0324345	0.0282278	4287	tags=50%, list=18%, signal=41%	SEMA4A/IL1RL1/IL23R/IL1B/HAVCR2/IL23A/RELB/IL12RB1/BCL3/IL4R/IL12B/IL27RA/SPN/IL18R1/IL6R/LEF1/JAK3/NLRP10
GO:0002548	GO:0002548	monocyte chemotaxis	35	0.717648	1.8907	0.00136799	0.0324345	0.0282278	3673	tags=43%, list=15%, signal=36%	CXCL10/CCL20/CCL2/CCL7/IL6/CCR1/FLT1/CCL4/PDGFB/CCL3/S100A14/GREM1/SERPINE1/SLIT2/IL6R
GO:0046850	GO:0046850	regulation of bone remodeling	35	0.687272	1.81068	0.00136799	0.0324345	0.0282278	2853	tags=31%, list=12%, signal=28%	DCSTAMP/IL6/SIGLEC15/TNFAIP3/S1PR1/CSF1R/TNFRSF11B/ITGB3/PDK4/GREM1/EGFR
GO:0048247	GO:0048247	lymphocyte chemotaxis	35	0.783413	2.06397	0.00136799	0.0324345	0.0282278	2058	tags=34%, list=9%, signal=31%	CXCR3/GPR183/CXCL10/CCL20/CCL2/CCL7/TNFSF14/CCL4/CCL3/CXCL11/PIK3CD/PIK3CG
GO:0032715	GO:0032715	negative regulation of interleukin-6 production	34	0.701166	1.83791	0.00137552	0.0324345	0.0282278	2592	tags=41%, list=11%, signal=37%	IL10/HAVCR2/NR1H4/NLRC3/C5AR2/TNFAIP3/PTPN6/GHRL/FOXP3/CD200R1/FOXJ1/ZC3H12A/HGF/IRAK3
GO:0051154	GO:0051154	negative regulation of striated muscle cell differentiation	33	0.688375	1.79504	0.00138696	0.0324345	0.0282278	1003	tags=18%, list=4%, signal=17%	CXCL10/DKK1/RGS4/TRIM72/RGS2/BHLHA15
GO:0061844	GO:0061844	antimicrobial humoral immune response mediated by antimicrobial peptide	31	0.812888	2.09742	0.00139665	0.0324345	0.0282278	2813	tags=55%, list=12%, signal=48%	HIST1H2BG/CXCL6/CXCL8/CXCL10/HIST1H2BC/CXCL3/KLK3/RNASE7/HIST1H2BF/CXCL5/HIST1H2BJ/HIST1H2BK/CXCL11/HRG/CXCL9/H2BFS/HIST2H2BE
GO:0097028	GO:0097028	dendritic cell differentiation	31	0.719903	1.8575	0.00139665	0.0324345	0.0282278	1548	tags=23%, list=6%, signal=21%	DCSTAMP/LILRB1/CSF2/CCR7/DHRS2/RELB/IRF4
GO:0002820	GO:0002820	negative regulation of adaptive immune response	29	0.731069	1.87272	0.00140252	0.0324345	0.0282278	2549	tags=41%, list=11%, signal=37%	LILRB1/IL1RL1/HAVCR2/ALOX15/PTPN6/IL7R/FOXP3/FOXJ1/IL4R/ZC3H12A/TBX21/LOXL3
GO:0045622	GO:0045622	regulation of T-helper cell differentiation	29	0.694423	1.77885	0.00140252	0.0324345	0.0282278	4764	tags=52%, list=20%, signal=42%	IL23R/IL23A/IL12RB1/FOXP3/IRF4/IL4R/NLRP3/ZC3H12A/TBX21/IL12B/LOXL3/NFKBIZ/JAK3/RARA/NFKBID
GO:0045124	GO:0045124	regulation of bone resorption	30	0.724141	1.85856	0.00140647	0.0324345	0.0282278	1816	tags=30%, list=8%, signal=28%	DCSTAMP/IL6/SIGLEC15/TNFAIP3/S1PR1/CSF1R/TNFRSF11B/ITGB3/PDK4
GO:0098751	GO:0098751	bone cell development	28	0.764826	1.9379	0.00140647	0.0324345	0.0282278	1074	tags=18%, list=4%, signal=17%	LILRB1/FLI1/GPR68/SIGLEC15/PTPN6
GO:1901186	GO:1901186	positive regulation of ERBB signaling pathway	30	0.672831	1.72687	0.00140647	0.0324345	0.0282278	2445	tags=27%, list=10%, signal=24%	FASLG/EREG/EPGN/TGFA/MMP9/PTK6/PLAUR/NEURL1
GO:0002823	GO:0002823	negative regulation of adaptive immune response based on somatic recombination of immune receptors built from immunoglobulin superfamily domains	27	0.722564	1.8231	0.00141443	0.0324345	0.0282278	2549	tags=41%, list=11%, signal=36%	LILRB1/IL1RL1/HAVCR2/PTPN6/IL7R/FOXP3/FOXJ1/IL4R/ZC3H12A/TBX21/LOXL3
GO:0031640	GO:0031640	killing of cells of other organism	25	0.74808	1.86238	0.00143885	0.0324345	0.0282278	2773	tags=40%, list=12%, signal=35%	CXCL6/IFNG/PRF1/HIST1H2BJ/HIST1H2BK/HTN1/HRG/AZU1/HTN3/CHGA
GO:0032770	GO:0032770	positive regulation of monooxygenase activity	25	0.736603	1.83381	0.00143885	0.0324345	0.0282278	1842	tags=24%, list=8%, signal=22%	GDNF/IFNG/IL1B/NPR3/S100A1/CDH3
GO:0043372	GO:0043372	positive regulation of CD4-positive, alpha-beta T cell differentiation	24	0.752985	1.86001	0.00143885	0.0324345	0.0282278	2108	tags=38%, list=9%, signal=34%	IFNG/IL23R/IL23A/IL12RB1/CD83/FOXP3/IL4R/NLRP3/IL12B
GO:0044364	GO:0044364	disruption of cells of other organism	25	0.74808	1.86238	0.00143885	0.0324345	0.0282278	2773	tags=40%, list=12%, signal=35%	CXCL6/IFNG/PRF1/HIST1H2BJ/HIST1H2BK/HTN1/HRG/AZU1/HTN3/CHGA
GO:0072538	GO:0072538	T-helper 17 type immune response	24	0.749283	1.85087	0.00143885	0.0324345	0.0282278	2549	tags=50%, list=11%, signal=45%	IL23R/IL6/IL23A/IL12RB1/FOXP3/IRF4/NLRP3/ZC3H12A/RORC/TBX21/IL12B/LOXL3
GO:0019731	GO:0019731	antibacterial humoral response	23	0.787118	1.93783	0.00144928	0.0325453	0.0283242	1007	tags=39%, list=4%, signal=38%	HIST1H2BG/FGB/HIST1H2BC/KLK3/RNASE7/HIST1H2BF/DMBT1/HIST1H2BJ/HIST1H2BK
GO:0072539	GO:0072539	T-helper 17 cell differentiation	22	0.800092	1.93202	0.00148148	0.0331425	0.028844	2549	tags=55%, list=11%, signal=49%	IL23R/IL6/IL23A/IL12RB1/FOXP3/IRF4/NLRP3/ZC3H12A/RORC/TBX21/IL12B/LOXL3
GO:0010818	GO:0010818	T cell chemotaxis	19	0.815524	1.92284	0.00151515	0.0336409	0.0292777	2589	tags=47%, list=11%, signal=42%	CXCR3/GPR183/CXCL10/TNFSF14/CCL3/CXCL11/PIK3CD/PIK3CG/TMEM102
GO:0045672	GO:0045672	positive regulation of osteoclast differentiation	19	0.838227	1.97638	0.00151515	0.0336409	0.0292777	2108	tags=42%, list=9%, signal=38%	IFNG/GPR68/IL23R/POU4F2/CCR1/IL23A/KLF10/IL12B
GO:0002363	GO:0002363	alpha-beta T cell lineage commitment	17	0.814687	1.8681	0.00153846	0.0340305	0.0296168	2873	tags=59%, list=12%, signal=52%	IL23R/IL6/IL23A/IL12RB1/FOXP3/IRF4/TBX21/IL12B/LOXL3/SPN
GO:0043373	GO:0043373	CD4-positive, alpha-beta T cell lineage commitment	15	0.850515	1.93093	0.0015528	0.0342194	0.0297812	2873	tags=67%, list=12%, signal=59%	IL23R/IL6/IL23A/IL12RB1/FOXP3/IRF4/TBX21/IL12B/LOXL3/SPN
GO:0002295	GO:0002295	T-helper cell lineage commitment	14	0.847769	1.89368	0.0016	0.0349985	0.0304593	2873	tags=64%, list=12%, signal=57%	IL23R/IL6/IL23A/IL12RB1/IRF4/TBX21/IL12B/LOXL3/SPN
GO:0002544	GO:0002544	chronic inflammatory response	14	0.875416	1.95544	0.0016	0.0349985	0.0304593	1999	tags=57%, list=8%, signal=52%	IL10/VCAM1/IDO1/VNN1/TNFAIP3/THBS1/FOXP3/CYP19A1
GO:0010035	GO:0010035	response to inorganic substance	463	0.412503	1.39123	0.00201005	0.0434571	0.0378208	5802	tags=27%, list=24%, signal=21%	IL10/SUCNR1/FGB/VCAM1/MPO/NTRK1/CSF2/CPNE7/IL6/AREG/CCR7/ALOX15/AQP3/TH/FABP4/TNFAIP3/CPNE9/THBS1/CYP1A1/ND6/NR4A3/SLC8A1/MMP3/MMP9/TNFRSF11B/TRPV6/TTN/SYT5/FOSB/SYT12/FOXO1/SYT13/SYT4/BMP6/JUNB/FOSL1/MAOB/MB/CD36/KCNMB1/ZC3H12A/ETS1/PRKCD/GIPR/HGF/KDM6B/HMGCS1/MT1G/ID2/CNGA3/ICAM1/CYBB/PDGFRB/KCNH1/CLDN1/ABAT/TRPC6/CYP2E1/KCNK3/EGFR/PHEX/MT2A/SELENOP/KPNA4/PPIF/FBP1/KCNA1/TPH2/TNF/ALOX5AP/RYR2/M…
GO:0007600	GO:0007600	sensory perception	423	0.40908	1.37533	0.0020141	0.0434571	0.0378208	3905	tags=25%, list=16%, signal=21%	IL10/LRAT/NTRK1/RDH8/CEACAM16/CHRNA9/CEMIP/GJB4/LOXHD1/POU4F2/KRT12/GRIN2A/CNR2/SLC26A4/NDP/ANO1/TH/OPRD1/CACNA1F/ABCA4/FSCN2/TBX1/MIP/LRIT3/NTSR1/TAS2R3/TULP1/VIP/OR1J4/RRH/GRK1/COL2A1/ITGA2/CCL3/OR2AG2/OR1J2/CRYBB1/RP1L1/TACSTD2/SCN1A/TMC1/RGS16/BEST2/CNGB1/STRC/PPEF1/OBP2A/CD36/PIGR/CDH3/OR6A2/OTOG/DRGX/ZNF513/SCN11A/ATP2B2/RDH10/NR2E3/GRIN2D/EYS/IL12B/ATXN7/TRPM8/CNGA3/ICAM1/PRDM12/OR10AC1/MB…
GO:0048608	GO:0048608	reproductive structure development	370	0.416378	1.397	0.0020141	0.0434571	0.0378208	4738	tags=26%, list=20%, signal=21%	IL10/NTRK1/CSF2/EREG/ZFP42/ESR1/FOXA1/HSD17B2/BASP1/STC1/NDP/TFAP2C/SOX8/PTX3/UMODL1/KLHL10/TCF7/REN/SEMA3A/SRD5A2/PRDM1/TP63/MAMLD1/KITLG/PDGFB/VGF/GHRL/WNT7B/ID4/TBX3/BIK/INHBB/BMP6/JUNB/FOSL1/COL9A3/PTGIS/LIF/PCDH12/RDH10/CYP19A1/ADM/SLIT3/NUP210L/LFNG/HMGCS1/PPARD/ADGRG1/ST14/NR0B1/ICAM1/RSPO3/H3F3B/TEX19/PDGFRB/WNT7A/OVOL2/SPINT2/BMPR2/INHBA/EGFR/SNAI1/GJB3/SOX15/ADAM19/ETV2/TNC/SLIT2/KRT19/…
GO:0061458	GO:0061458	reproductive system development	373	0.414393	1.39022	0.00201613	0.0434571	0.0378208	4738	tags=26%, list=20%, signal=21%	IL10/NTRK1/CSF2/EREG/ZFP42/ESR1/FOXA1/HSD17B2/BASP1/STC1/NDP/TFAP2C/SOX8/PTX3/UMODL1/KLHL10/TCF7/REN/SEMA3A/SRD5A2/PRDM1/TP63/MAMLD1/KITLG/PDGFB/VGF/GHRL/WNT7B/ID4/TBX3/BIK/INHBB/BMP6/JUNB/FOSL1/COL9A3/PTGIS/LIF/PCDH12/RDH10/CYP19A1/ADM/SLIT3/NUP210L/LFNG/HMGCS1/PPARD/ADGRG1/ST14/NR0B1/ICAM1/RSPO3/H3F3B/TEX19/PDGFRB/WNT7A/OVOL2/SPINT2/BMPR2/INHBA/EGFR/SNAI1/GJB3/SOX15/ADAM19/ETV2/TNC/SLIT2/KRT19/…
GO:0052547	GO:0052547	regulation of peptidase activity	345	0.427053	1.42622	0.00202634	0.0435185	0.0378742	4704	tags=23%, list=20%, signal=19%	SERPINB2/FASLG/SERPIND1/BIRC3/TFPI2/AIM2/TNFSF14/GRIN2A/F3/WFDC10B/VTN/TNFSF15/UMODL1/LCK/SERPINA9/ITIH4/MEFV/THBS1/WFDC1/TTBK1/TP63/SERPINB4/AMBP/MMP9/EPHA4/P2RX1/SERPINA3/PI16/PLAUR/COL6A3/HRG/NLRP3/WDR35/HERPUD1/A2M/HGF/NGFR/SERPINA6/SPINK6/TIMP4/MBP/SERPINB8/NGF/SPINT2/XDH/ST18/CST2/CD44/MYC/SOX7/CST6/TNF/FN1/CTGF/DAPK1/SERPINE1/EGLN3/SMAD3/ITIH3/BAK1/TFAP4/WNT9A/ARL6IP1/SH3RF1/C4A/ST20/SERPI…
GO:0001503	GO:0001503	ossification	326	0.438299	1.45897	0.00203666	0.0435573	0.037908	5496	tags=35%, list=23%, signal=27%	DKK1/KL/IGF1/IL6/DMP1/STC1/CYP24A1/AREG/ALOX15/CCR1/SOX8/RANBP3L/S1PR1/MATN1/IGFBP3/TP63/SLC8A1/MMP9/COL2A1/SEMA7A/CCL3/WNT7B/VCAN/MMP13/ID4/NPPC/ID3/PTHLH/BMP6/JUNB/CLEC3A/TPH1/CLEC3B/KLF10/KREMEN2/HGF/ID2/CBFB/WWTR1/H3F3B/GREM1/ID1/TAC1/BMP2/BMPR2/SNAI2/NPNT/EGFR/PHEX/SNAI1/ALPL/COL13A1/DDX21/FGF18/TNF/GTPBP4/SOST/ENPP1/ACP5/MYBBP1A/CTGF/TNC/GDF10/COL6A1/ITGA11/SMOC1/SMAD3/PAM16/IL6R/SBNO2/MEF2…
GO:1903532	GO:1903532	positive regulation of secretion by cell	298	0.429509	1.42448	0.0020429	0.0435573	0.037908	5477	tags=28%, list=23%, signal=22%	IL10/FGB/GDNF/IFNG/ILDR1/GPR68/IL1RL1/IGF1/AIM2/HAVCR2/NR1H4/IL6/ANO1/OSM/TNFRSF4/NTSR1/CSF1R/SLC6A4/POSTN/VIP/TTN/CD274/PAEP/GHRL/CCL3/SYT4/SDC4/INHBB/BMP6/UNC13A/IL4R/NLRP3/CYP19A1/GIPR/PPARD/VEGFC/ITGAM/MBP/RAB3D/ABAT/TAC1/INHBA/EGFR/KISS1/CHRNB2/EZR/TNF/RAB8B/DOC2B/DRD2/GAL/RASGRP1/CD177/TLR1/KCNN4/SPP1/APLN/FCER1G/PTPN22/NLRP10/SAA1/BLK/STX1A/PSMD9/IL1RAP/TGFB1/NKX3-1/MYOM1/EDN1/IL1A/IL17RA/…
GO:0065004	GO:0065004	protein-DNA complex assembly	208	0.464762	1.50604	0.00208551	0.0440492	0.038336	4409	tags=19%, list=18%, signal=15%	HIST1H2BG/HIST1H1E/ESR1/TAF1L/HIST1H2BC/HIST1H4D/HIST1H2BF/HIST1H2BM/HIST1H1T/HIST1H2BJ/TAF7L/HIST2H4B/HIST1H4H/HIST1H2BK/H1F0/HIST1H3A/HNF1B/HIST1H4J/HIST1H3H/HIST1H2BD/IPO4/HIST1H3B/H3F3B/HIST1H4E/TAF4B/H2BFS/HIST2H2BE/HIST4H4/TSPY26P/GTF2H4/HIST1H2BE/HIST2H4A/MCMDC2/H1FX/RAD51/HIST1H2BL/BRD2/TSPYL2/GRWD1
GO:0051091	GO:0051091	positive regulation of DNA-binding transcription factor activity	223	0.44899	1.45566	0.00208768	0.0440492	0.038336	5052	tags=25%, list=21%, signal=20%	CSF3/IL10/NTRK1/TRAF1/RELN/AIM2/IL1B/WNT1/TRIM15/ESR1/FOXA1/CARD14/IL6/CAMK2A/NDP/OPRD1/TNFRSF8/SPHK1/FOSL1/NFKB1/CD36/NLRP3/NFKB2/ICAM1/RHEBL1/CX3CR1/IRAK3/GREM1/IRAK2/IL18R1/EPHA5/TNF/PPRC1/TMEM173/SMAD3/FER/ZBTB7A/CYTL1/CARD11/ARHGEF2/LRRFIP1/BCL10/NEUROD2/IL1RAP/PRKCH/DHX33/RNF25/TGFB1/TNFSF18/EDN1/TRIM31/WNT3A/CX3CL1/IL18RAP/HIPK2
GO:0001763	GO:0001763	morphogenesis of a branching structure	174	0.470706	1.51302	0.0021322	0.0440492	0.038336	3632	tags=27%, list=15%, signal=23%	IL10/GDNF/WNT1/ESR1/FOXA1/AREG/PAX8/SOX8/TGM2/SEMA3A/PRDM1/TP63/HNF1B/FOXD1/HHIP/ESRP2/TACSTD2/NRP1/TBX3/FGF1/RDH10/ADM/HGF/ST14/RSPO3/ADAMTS16/FGF2/SPRY2/SPINT2/GREM1/BMP2/SNAI2/NOTCH4/NPNT/MYC/COL13A1/RASIP1/DLL4/TGFBR2/TNF/COL4A1/TNC/SEMA3C/SLIT2/WT1/PLXND1/MET
GO:0006323	GO:0006323	DNA packaging	159	0.490128	1.56648	0.00214592	0.0440492	0.038336	3070	tags=17%, list=13%, signal=15%	HIST1H2BG/HIST1H1E/HIST1H2BC/HIST1H4D/HIST1H2BF/HIST1H2BM/HIST1H1T/HIST1H2BJ/HIST2H4B/HIST1H4H/HIST1H2BK/H1F0/HIST1H3A/HIST1H4J/TTN/M1AP/HMGA2/HIST1H3H/HIST1H2BD/IPO4/HIST1H3B/H3F3B/HIST1H4E/H2BFS/HIST2H2BE/HIST4H4/TSPY26P
GO:0034341	GO:0034341	response to interferon-gamma	160	0.492404	1.57493	0.00214592	0.0440492	0.038336	2808	tags=16%, list=12%, signal=14%	OTOP1/VCAM1/IFNG/CCL20/GBP5/IL23R/IRGM/CCL2/CCL7/CAMK2A/OASL/MEFV/IL12RB1/CDC42EP2/CCL4/IFI30/CCL3/IRF4/PRKCD/IL12B/CAMK2B/ICAM1/IRF6/CLDN1/GBP1/CD44
GO:0002440	GO:0002440	production of molecular mediator of immune response	152	0.501985	1.60156	0.00215983	0.0440492	0.038336	4325	tags=26%, list=18%, signal=21%	IL10/LILRB1/GAPT/IL1B/KLK3/IL6/POU2F2/MZB1/TNFRSF4/CD74/NR4A3/CD28/SEMA7A/IL7R/FOXP3/IL4R/CD36/NLRP3/TBX21/CD55/IL12B/CLCF1/IRAK3/IL27RA/CHGA/DDX21/IL18R1/TNF/PTPRC/CD22/IL4/PROKR1/FCER1G/ERCC1/CD96/JAK3/KLK5/MMP7/CARD11
GO:0071346	GO:0071346	cellular response to interferon-gamma	142	0.496339	1.576	0.0021645	0.0440492	0.038336	3532	tags=20%, list=15%, signal=17%	OTOP1/VCAM1/IFNG/CCL20/GBP5/IRGM/CCL2/CCL7/CAMK2A/OASL/IL12RB1/CDC42EP2/CCL4/IFI30/CCL3/IRF4/PRKCD/IL12B/CAMK2B/ICAM1/IRF6/CLDN1/GBP1/CD44/MT2A/ZYX/DAPK1/IRF1
GO:0002685	GO:0002685	regulation of leukocyte migration	144	0.518216	1.64687	0.00216685	0.0440492	0.038336	2662	tags=21%, list=11%, signal=19%	CXCR3/CXCL8/CXCL10/CCL20/CCL2/CCL7/TNFSF14/CMKLR1/IL6/CCR7/CCR1/TNFRSF18/IL23A/C5AR2/CD74/THBS1/CCL4/KITLG/ITGA2/CCL3/CD200R1/S100A14/CYP19A1/RAC2/ADTRP/VEGFC/ICAM1/CX3CR1/TMEM102/GREM1
GO:0002221	GO:0002221	pattern recognition receptor signaling pathway	149	0.489893	1.55609	0.0021692	0.0440492	0.038336	3026	tags=17%, list=13%, signal=15%	TLR7/FGB/BIRC3/TRIM15/HAVCR2/NR1H4/ESR1/IRGM/DMBT1/TNFAIP3/S100A1/CTSS/NR1D1/IRF4/CD36/S100A14/SARM1/TLR10/ITGAM/TNIP3/IKBKE/IRAK3/IRAK2/TRAF3/MARCO/TLR5
GO:0006333	GO:0006333	chromatin assembly or disassembly	145	0.509262	1.61689	0.00217155	0.0440492	0.038336	4409	tags=23%, list=18%, signal=19%	HIST1H2BG/HIST1H1E/HIST1H2BC/HIST1H4D/HIST1H2BF/HIST1H2BM/HIST1H1T/HIST1H2BJ/HIST2H4B/HIST1H4H/HIST1H2BK/H1F0/HIST1H3A/HIST1H4J/M1AP/HMGA2/HIST1H3H/HIST1H2BD/IPO4/HIST1H3B/H3F3B/HIST1H4E/H2BFS/HIST2H2BE/HIST4H4/TSPY26P/HIST1H2BE/HIST2H4A/TAL1/H1FX/HIST1H2BL/BRD2/TSPYL2/GRWD1
GO:0043901	GO:0043901	negative regulation of multi-organism process	141	0.500939	1.58953	0.00217155	0.0440492	0.038336	2108	tags=15%, list=9%, signal=14%	IL10/MPO/ASTL/IGF1/TRIM15/HAVCR2/PTX3/POU2F3/TNFAIP3/OASL/PTGDR2/CCL4/TRIM10/PAEP/CCL3/HMGA2/NPPC/CD36/ZC3H12A/TRIB1/IL12B
GO:0045766	GO:0045766	positive regulation of angiogenesis	146	0.507902	1.612	0.00217391	0.0440492	0.038336	3651	tags=27%, list=15%, signal=23%	IL10/CXCL8/ANGPTL4/IL1B/ANGPT2/EPHA1/F3/FLT1/LRG1/S100A1/FOXC2/APLNR/THBS1/GHRL/SPHK1/HMGA2/NRP1/FGF1/PTGIS/BTG1/ZC3H12A/ETS1/ADM/HGF/CDH5/VEGFC/CYBB/CX3CR1/FGF2/GREM1/AGO2/TGFBR2/FGF18/JCAD/SERPINE1/HK2/RHOB/HYAL1/RUNX1
GO:0022408	GO:0022408	negative regulation of cell-cell adhesion	136	0.524121	1.65805	0.00218103	0.0440492	0.038336	4364	tags=33%, list=18%, signal=27%	IL10/LILRB1/PLA2G2D/IL1RN/IDO1/WNT1/HAVCR2/CD74/PTPN6/CD274/SDC4/FOXP3/RUNX3/FOXJ1/IL4R/ZC3H12A/TBX21/PRKCD/ADTRP/CTLA4/CBFB/MBP/TNFRSF21/MYADM/LOXL3/SPINT2/ABAT/MIR222/BMP2/SNAI2/SPN/CDSN/MIR221/BTN2A2/GTPBP4/IRF1/RUNX1/LAG3/B4GALNT2/JAG1/PODXL/RIPOR2/PTPN22/JAK3/CEBPB
GO:0031960	GO:0031960	response to corticosteroid	136	0.543458	1.71922	0.00218103	0.0440492	0.038336	3490	tags=26%, list=14%, signal=22%	IL10/IL1RN/ACSBG1/IL6/STC1/AREG/FBXO32/TH/SSTR3/ERRFI1/CALCR/FOSB/FOXO1/WNT7B/SOX30/NR3C1/BMP6/FOSL1/MAOB/ADM/SLIT3/CDO1/PAPPA/CNGA3/ICAM1/CYBB/CLDN1/EGFR/ALPL/ATP2B1/TPH2/TNF/CTGF/SSTR2/SLIT2
GO:0050707	GO:0050707	regulation of cytokine secretion	136	0.533491	1.68769	0.00218103	0.0440492	0.038336	3303	tags=26%, list=14%, signal=22%	IL10/LILRB1/IL1RL1/AIM2/HAVCR2/NR1H4/CRP/CCR7/OSM/C5AR2/TNFAIP3/TNFRSF4/CSF1R/POSTN/CD274/PAEP/GHRL/CCL3/FOXP3/CD200R1/IL4R/NLRP3/ZC3H12A/TLR10/MBP/TNFRSF21/IL1R2/GBP1/SSC5D/TLR5/EZR/BTN2A2/TNF/FN1/FOXP1
GO:0001959	GO:0001959	regulation of cytokine-mediated signaling pathway	137	0.511931	1.61984	0.00218579	0.0440492	0.038336	3919	tags=18%, list=16%, signal=15%	OTOP1/IL1RN/IFNG/BIRC3/TRAF1/NR1H4/IRGM/IL6/HIST1H2BJ/TNFAIP3/CD74/PTPN6/SPHK1/SLIT3/CBFB/IL1R2/IRAK3/IRAK2/TNF/PTPRC/SLIT2/RUNX1/OTUD4/TNFRSF1A
GO:0034728	GO:0034728	nucleosome organization	134	0.516269	1.62842	0.00220022	0.0440492	0.038336	4409	tags=25%, list=18%, signal=20%	HIST1H2BG/HIST1H1E/HIST1H2BC/HIST1H4D/HIST1H2BF/HIST1H2BM/HIST1H1T/HIST1H2BJ/HIST2H4B/HIST1H4H/HIST1H2BK/H1F0/HIST1H3A/HIST1H4J/HIST1H3H/HIST1H2BD/IPO4/HIST1H3B/H3F3B/HIST1H4E/H2BFS/HIST2H2BE/SRCAP/HIST4H4/TSPY26P/HIST1H2BE/HIST2H4A/INO80/H1FX/HIST1H2BL/BRD2/TSPYL2/GRWD1
GO:0051897	GO:0051897	positive regulation of protein kinase B signaling	134	0.545556	1.72079	0.00220022	0.0440492	0.038336	3219	tags=27%, list=13%, signal=23%	CSF3/EREG/KL/ESR1/FGF3/F3/LIN28A/CCR7/OSM/LCK/FGF5/THBS1/CALCR/CD28/KITLG/PDGFB/CCL3/HBEGF/MST1R/NRG1/PIK3CD/FGF1/PIK3CG/RASD2/HGF/FGF4/CX3CR1/BTC/PDGFRB/FGF2/SPRY2/MIR222/EGFR/MIR221/FGF18/TNF
GO:0045619	GO:0045619	regulation of lymphocyte differentiation	131	0.538644	1.69229	0.00221729	0.044241	0.038503	4764	tags=37%, list=20%, signal=30%	IFNG/IL23R/TOX/VNN1/TNFRSF18/IL23A/CD74/PTPN6/PRDM1/IL12RB1/CD28/CD83/IL7R/FOXP3/RUNX3/IRF4/FOXJ1/IL4R/NFATC2/NLRP3/ZC3H12A/TBX21/IL12B/CTLA4/ID2/CBFB/ZAP70/LOXL3/INHBA/MIR17HG/TGFBR2/BTN2A2/SOX13/NFKBIZ/PTPRC/IRF1/RUNX1/IL4/ZEB1/FLT3LG/SH3RF1/RASGRP1/ZFP36L1/JAK3/CARD11/RARA/PPP2R3C/TGFB1/NFKBID
GO:0050864	GO:0050864	regulation of B cell activation	93	0.534488	1.63443	0.00225479	0.0442491	0.0385101	3811	tags=28%, list=16%, signal=24%	IL10/GPR183/IL6/MZB1/TBC1D10C/TNFAIP3/TNFRSF4/CD74/PTPN6/CD28/FOXP3/FOXJ1/NFATC2/TBX21/CLCF1/CTLA4/ID2/TNFRSF21/IL27RA/INHBA/CHRNB2/MIR17HG/PTPRC/CD22/IL4/PROKR1
GO:0003158	GO:0003158	endothelium development	106	0.519257	1.60667	0.00225989	0.0442491	0.0385101	5203	tags=42%, list=22%, signal=33%	CXCL10/IL1B/GJA5/STC1/PDE4D/S1PR1/PROC/WNT7B/NRP1/NRG1/BMP6/FGF1/BTG1/PECAM1/CDH5/KDM6B/ICAM1/MYADM/WNT7A/SOX17/CLDN1/GJA4/ID1/XDH/BMPR2/NOTCH4/EZR/TNF/ETV2/FOXP1/RHOB/NR2F2/MET/ZEB1/TNFRSF1A/JAG1/SCUBE1/APOLD1/S1PR2/HEY1/TJP1/KDR/ACVR2B/STARD13
GO:0035821	GO:0035821	modification of morphology or physiology of other organism	116	0.515051	1.60269	0.00225989	0.0442491	0.0385101	5052	tags=28%, list=21%, signal=22%	CXCL6/IFNG/RNASE7/PRF1/HIST1H2BJ/PTX3/POU2F3/HIST1H2BK/CD209/CCL4/HTN1/CCL3/HMGA2/HRG/AZU1/ZC3H12A/HTN3/MIR222/CHGA/MIR221/KPNA4/RRP1B/SMAD3/TFAP4/LEF1/NTRK3/TGFB1/REST/KPNA7/HSPA8/ITGAV/HIPK2
GO:0002224	GO:0002224	toll-like receptor signaling pathway	108	0.517782	1.60497	0.00226757	0.0442491	0.0385101	3026	tags=20%, list=13%, signal=18%	TLR7/FGB/BIRC3/HAVCR2/NR1H4/ESR1/TNFAIP3/S100A1/CTSS/NR1D1/IRF4/CD36/S100A14/SARM1/TLR10/ITGAM/TNIP3/IKBKE/IRAK3/IRAK2/TRAF3/TLR5
GO:0002576	GO:0002576	platelet degranulation	110	0.526393	1.63338	0.00226757	0.0442491	0.0385101	4932	tags=34%, list=20%, signal=27%	FGB/IGF1/PCDH7/PLEK/ITIH4/THBS1/TTN/PDGFB/P2RX1/SERPINA3/ITGB3/CD36/CLEC3B/HRG/PECAM1/A2M/HGF/VEGFC/TUBA4A/SELENOP/FN1/SERPINE1/FERMT3/ITIH3/VCL/FAM3C/SERPINA1/FCER1G/TIMP1/ACTN2/SRGN/ISLR/ACTN1/SERPINF2/TGFB1/WDR1/PCYOX1L
GO:0008037	GO:0008037	cell recognition	115	0.518891	1.61244	0.00227015	0.0442491	0.0385101	2822	tags=22%, list=12%, signal=19%	ASTL/MYPN/HAVCR2/CCR7/PRF1/HIST1H1T/TULP1/SEMA3A/CD209/EPHA4/DSCAML1/VSTM2L/PAEP/VCAN/NRP1/KCNU1/CD36/PCDH12/PECAM1/CATSPER1/EFNB3/TNFRSF21/OVGP1/ROBO4/NCR3
GO:0051928	GO:0051928	positive regulation of calcium ion transport	97	0.521689	1.59907	0.00227015	0.0442491	0.0385101	1744	tags=20%, list=7%, signal=18%	CXCL10/F2RL3/CEMIP/CCL2/STC1/CAMK2A/P2RY6/CCR1/NTSR1/S100A1/APLNR/MCHR1/CCL4/CALCR/PDGFB/CCL3/HSPA2/CXCL11/STAC2
GO:0030183	GO:0030183	B cell differentiation	89	0.552818	1.67706	0.00229358	0.0445588	0.0387796	4325	tags=28%, list=18%, signal=23%	IL10/GPR183/VCAM1/LYL1/NTRK1/IL11/IFNE/POU2F2/PTPN6/BCL3/CLCF1/LFNG/ID2/INHBA/MIR17HG/DOCK10/PTPRC/MFNG/KLF6/BAK1/IL4/ZBTB7A/ZFP36L1/JAK3/CARD11
GO:0042136	GO:0042136	neurotransmitter biosynthetic process	78	0.558942	1.67061	0.0023753	0.0459951	0.0400296	3604	tags=28%, list=15%, signal=24%	IL10/IFNG/SLC5A7/IL1B/SLC22A2/TH/PTX3/SLC6A4/TPH1/CD36/PTGIS/WDR35/ZC3H12A/ICAM1/CX3CR1/ABAT/DDC/TPH2/TNF/CHAT/ACP5/SMAD3
GO:0042273	GO:0042273	ribosomal large subunit biogenesis	72	0.574023	1.694	0.00240674	0.0464108	0.0403913	6266	tags=40%, list=26%, signal=30%	NWD2/RPL3L/RRS1/NIP7/NOP2/URB1/GTPBP4/ZNHIT6/DDX28/WDR74/PPAN/NOP16/RPL26L1/EBNA1BP2/MRTO4/RPF2/SDAD1/SURF6/PES1/WDR12/MDN1/RSL1D1/BOP1/RPL7L1/RPL26/ZNF622/NOL9/FASTKD2/RPF1
GO:0042100	GO:0042100	B cell proliferation	58	0.586664	1.68916	0.00243605	0.0464108	0.0403913	2452	tags=26%, list=10%, signal=23%	IL10/GPR183/GAPT/IFNE/MZB1/MS4A1/TNFRSF4/CD74/IL7R/NFATC2/CTPS1/PRKCD/CLCF1/CTLA4/TNFRSF21
GO:0042509	GO:0042509	regulation of tyrosine phosphorylation of STAT protein	58	0.609235	1.75415	0.00243605	0.0464108	0.0403913	2146	tags=26%, list=9%, signal=24%	IFNG/CSF2/IL24/IGF1/IL23R/IL6/OSM/TNFRSF18/IL23A/CSF1R/PTK6/LIF/PECAM1/IL12B/CLCF1
GO:0046427	GO:0046427	positive regulation of JAK-STAT cascade	59	0.608514	1.75369	0.00243605	0.0464108	0.0403913	2146	tags=25%, list=9%, signal=23%	IFNG/CSF2/IL24/IGF1/IL23R/IL6/OSM/TNFRSF18/IL23A/CSF1R/PTK6/LIF/PECAM1/IL12B/CLCF1
GO:0070664	GO:0070664	negative regulation of leukocyte proliferation	58	0.608116	1.75093	0.00243605	0.0464108	0.0403913	2873	tags=26%, list=12%, signal=23%	IL10/LILRB1/PLA2G2D/IDO1/HAVCR2/TNFAIP3/PTPN6/CD274/SDC4/FOXP3/FOXJ1/CTLA4/TNFRSF21/GREM1/SPN
GO:0032088	GO:0032088	negative regulation of NF-kappaB transcription factor activity	69	0.565909	1.65407	0.00244798	0.0464754	0.0404476	2829	tags=22%, list=12%, signal=19%	IL10/AIM2/HAVCR2/NR1H4/CMKLR1/NLRC3/TNFAIP3/FOXP3/FOXJ1/PTGIS/NLRP3/ZC3H12A/IRAK3/IRAK2/TRAF3
GO:0001910	GO:0001910	regulation of leukocyte mediated cytotoxicity	57	0.590637	1.68839	0.00246305	0.0464754	0.0404476	2822	tags=23%, list=12%, signal=20%	CXCL6/LILRB1/IL23R/HAVCR2/IL23A/IL12RB1/SERPINB4/IL7R/RAET1E/IL12B/ICAM1/RAET1E/NCR3
GO:0034103	GO:0034103	regulation of tissue remodeling	57	0.604896	1.72915	0.00246305	0.0464754	0.0404476	5310	tags=40%, list=22%, signal=32%	DCSTAMP/IL6/SIGLEC15/IL23A/TNFAIP3/S1PR1/CSF1R/TNFRSF11B/ITGB3/PDK4/HRG/IL12B/GREM1/EGFR/BCR/SPP1/IL20RA/TGFB1/ABR/MC4R/UBASH3B/SYT7/SRC
GO:0050918	GO:0050918	positive chemotaxis	52	0.623219	1.75286	0.00250941	0.0471993	0.0410776	2536	tags=29%, list=11%, signal=26%	CXCL8/GDNF/CCR4/ANGPT2/F3/S1PR1/SAA2/ITGA2/PDGFB/CCL3/NRP1/AZU1/HGF/VEGFC/FGF2
GO:0042531	GO:0042531	positive regulation of tyrosine phosphorylation of STAT protein	49	0.635305	1.77181	0.00253485	0.0472267	0.0411014	4175	tags=45%, list=17%, signal=37%	IFNG/CSF2/IL24/IGF1/IL23R/IL6/OSM/TNFRSF18/IL23A/CSF1R/PTK6/LIF/PECAM1/IL12B/CLCF1/MIR221/CNTF/IL6R/IL4/CRLF1/TNFRSF1A/STAP2
GO:0045453	GO:0045453	bone resorption	49	0.631157	1.76024	0.00253485	0.0472267	0.0411014	4192	tags=35%, list=17%, signal=29%	DCSTAMP/IL6/SIGLEC15/TNFAIP3/S1PR1/CSF1R/TNFRSF11B/ITGB3/PDK4/RAC2/GPR55/RAB3D/EGFR/ACP5/ADRB2/SPP1/IL20RA
GO:0051148	GO:0051148	negative regulation of muscle cell differentiation	49	0.63284	1.76494	0.00253485	0.0472267	0.0411014	3060	tags=24%, list=13%, signal=21%	CXCL10/DKK1/EREG/RGS4/TRIM72/RGS2/BHLHA15/PDGFB/NFATC2/MIR222/BMP2/MIR221
GO:0010870	GO:0010870	positive regulation of receptor biosynthetic process	11	-0.801099	-1.93226	0.00255102	0.0473784	0.0412335	105	tags=18%, list=0%, signal=18%	FGF21
GO:0046579	GO:0046579	positive regulation of Ras protein signal transduction	47	0.6599	1.82352	0.002574	0.0476554	0.0414745	2788	tags=36%, list=12%, signal=32%	LPAR6/NTRK1/F2RL3/IGF1/GPR65/MMD2/KITLG/NRG1/DGKI/GPR17/GPR4/GPR55/ADGRG1/PDGFRB/NGF/PRAG1/RASGRF1
GO:0032663	GO:0032663	regulation of interleukin-2 production	46	0.640018	1.75174	0.00260756	0.0479342	0.0417172	4325	tags=39%, list=18%, signal=32%	IL1B/HAVCR2/NR1H4/PDE4D/TNFAIP3/PDE4B/CD28/CD83/FOXP3/IRF4/NAV3/TBX21/GBP1/EZR/PTPRC/RUNX1/LAG3/CARD11
GO:0042130	GO:0042130	negative regulation of T cell proliferation	46	0.649758	1.7784	0.00260756	0.0479342	0.0417172	1640	tags=22%, list=7%, signal=20%	IL10/LILRB1/PLA2G2D/IDO1/HAVCR2/PTPN6/CD274/SDC4/FOXP3/FOXJ1
GO:0006949	GO:0006949	syncytium formation	43	0.648659	1.7592	0.00265604	0.0479342	0.0417172	5048	tags=49%, list=21%, signal=39%	DCSTAMP/CXCL10/WNT1/TNFSF14/NPHS1/CD53/IL4R/NFATC2/EHD1/CXCL9/KCNH1/FER1L5/SBNO2/FLT3LG/ERCC1/ADAM12/RIPOR2/ADGRB1/NOS1/MYH9/DYRK1B
GO:0008347	GO:0008347	glial cell migration	43	0.636847	1.72716	0.00265604	0.0479342	0.0417172	3100	tags=30%, list=13%, signal=26%	GPR183/RELN/CCL2/EPHA4/CCL3/AZU1/ADGRG1/CX3CR1/MIR222/CSPG4/LAMB1/MIR221/SUN2
GO:0043949	GO:0043949	regulation of cAMP-mediated signaling	44	0.646141	1.75543	0.00265604	0.0479342	0.0417172	2388	tags=25%, list=10%, signal=23%	CXCL10/RGS2/PDE4D/PDE3A/APLNR/ADRB1/CXCL11/GPR61/RASD2/GIPR/CXCL9
GO:0050819	GO:0050819	negative regulation of coagulation	44	0.66541	1.80778	0.00265604	0.0479342	0.0417172	2663	tags=30%, list=11%, signal=26%	SERPINB2/FGB/VTN/PROC/PLAU/THBS1/PDGFB/THBD/PLAUR/HRG/PRKCD/ADTRP/ABAT
GO:0000768	GO:0000768	syncytium formation by plasma membrane fusion	42	0.646606	1.74506	0.00267023	0.0479342	0.0417172	5048	tags=48%, list=21%, signal=38%	DCSTAMP/CXCL10/WNT1/TNFSF14/NPHS1/CD53/IL4R/NFATC2/EHD1/CXCL9/KCNH1/FER1L5/SBNO2/FLT3LG/ADAM12/RIPOR2/ADGRB1/NOS1/MYH9/DYRK1B
GO:0030195	GO:0030195	negative regulation of blood coagulation	42	0.668974	1.80543	0.00267023	0.0479342	0.0417172	2663	tags=31%, list=11%, signal=28%	SERPINB2/FGB/VTN/PROC/PLAU/THBS1/PDGFB/THBD/PLAUR/HRG/PRKCD/ADTRP/ABAT
GO:0140253	GO:0140253	cell-cell fusion	42	0.646606	1.74506	0.00267023	0.0479342	0.0417172	5048	tags=48%, list=21%, signal=38%	DCSTAMP/CXCL10/WNT1/TNFSF14/NPHS1/CD53/IL4R/NFATC2/EHD1/CXCL9/KCNH1/FER1L5/SBNO2/FLT3LG/ADAM12/RIPOR2/ADGRB1/NOS1/MYH9/DYRK1B
GO:1900047	GO:1900047	negative regulation of hemostasis	42	0.668974	1.80543	0.00267023	0.0479342	0.0417172	2663	tags=31%, list=11%, signal=28%	SERPINB2/FGB/VTN/PROC/PLAU/THBS1/PDGFB/THBD/PLAUR/HRG/PRKCD/ADTRP/ABAT
GO:0043368	GO:0043368	positive T cell selection	28	0.690525	1.74963	0.00281294	0.0499873	0.043504	3464	tags=46%, list=14%, signal=40%	IL23R/IL6/IL23A/CD74/IL12RB1/FOXP3/IRF4/TBX21/IL12B/ZAP70/LOXL3/SPN/PTPRC
GO:0045742	GO:0045742	positive regulation of epidermal growth factor receptor signaling pathway	28	0.687322	1.74152	0.00281294	0.0499873	0.043504	2445	tags=29%, list=10%, signal=26%	FASLG/EREG/EPGN/TGFA/MMP9/PTK6/PLAUR/NEURL1
GO:2000516	GO:2000516	positive regulation of CD4-positive, alpha-beta T cell activation	28	0.692365	1.75429	0.00281294	0.0499873	0.043504	3404	tags=43%, list=14%, signal=37%	IFNG/IL23R/IL23A/IL12RB1/CD83/FOXP3/IL4R/NLRP3/CD55/IL12B/TGFBR2/NFKBIZ
GO:0000183	GO:0000183	chromatin silencing at rDNA	27	0.699952	1.76605	0.00282885	0.0499873	0.043504	2854	tags=41%, list=12%, signal=36%	HIST1H4D/HIST2H4B/HIST1H4H/HIST1H3A/HIST1H4J/HIST1H3H/HIST1H3B/BEND3/H3F3B/HIST1H4E/HIST4H4
GO:0032607	GO:0032607	interferon-alpha production	24	0.710289	1.75455	0.0028777	0.0499873	0.043504	551	tags=17%, list=2%, signal=16%	IL10/TLR7/HAVCR2/NLRC3
GO:0032620	GO:0032620	interleukin-17 production	24	0.704187	1.73947	0.0028777	0.0499873	0.043504	2108	tags=29%, list=9%, signal=27%	IFNG/IL23R/NR1H4/OSM/IL23A/FOXP3/IL12B
GO:0032689	GO:0032689	negative regulation of interferon-gamma production	25	0.723598	1.80143	0.0028777	0.0499873	0.043504	1972	tags=32%, list=8%, signal=29%	IL10/LILRB1/IL1RL1/HAVCR2/NR1H4/CD274/FOXP3/ZC3H12A
GO:0032692	GO:0032692	negative regulation of interleukin-1 production	24	0.701557	1.73298	0.0028777	0.0499873	0.043504	2501	tags=42%, list=10%, signal=37%	IL10/NR1H4/TNFAIP3/MEFV/ERRFI1/GHRL/NLRP3/ZC3H12A/IL1R2/CX3CR1
GO:0032814	GO:0032814	regulation of natural killer cell activation	24	0.700921	1.73141	0.0028777	0.0499873	0.043504	4253	tags=42%, list=18%, signal=34%	IL23R/HAVCR2/TOX/IL23A/PRDM1/IL12B/IL6R/FLT3LG/RASGRP1/PTPN22
GO:0060330	GO:0060330	regulation of response to interferon-gamma	24	0.707581	1.74786	0.0028777	0.0499873	0.043504	414	tags=12%, list=2%, signal=12%	OTOP1/IFNG/IRGM
GO:0060334	GO:0060334	regulation of interferon-gamma-mediated signaling pathway	24	0.707581	1.74786	0.0028777	0.0499873	0.043504	414	tags=12%, list=2%, signal=12%	OTOP1/IFNG/IRGM

## Sheet: kegg_G1S_vs_S
ID	Description	GeneRatio	BgRatio	pvalue	p.adjust	qvalue	geneID	Count
hsa04060	Cytokine-cytokine receptor interaction	89/1154	188/6297	2.32185e-20	7.2906e-18	5.98792e-18	CSF3/CXCR3/IL10/CXCL6/CXCL8/IL1RN/CXCL10/IFNG/CCR4/FASLG/CCL20/CSF2/IL1RL1/IL24/IL11/IL23R/IL1B/IFNE/CXCL3/CCL2/CCL7/TNFSF14/IL2RG/IL6/CCR7/TNFSF15/CCR1/OSM/TNFRSF18/IL23A/IL34/TNFRSF4/CSF2RB/CSF1R/IL12RB1/CCL4/TNFRSF11B/TNFRSF8/CCL3/IL7R/CXCL11/INHBB/BMP6/IL4R/LIF/TNFRSF9/CLCF1/NGFR/TNFRSF12A/MPL/TNFRSF1B/TNFRSF21/IL1R2/NGF/LTB/BMP2/BMPR2/IL27RA/IL32/IL17RE/INHBA/IL18R1/TGFBR2/IL2RB/CNTF/IL6R/CC…	89
hsa05202	Transcriptional misregulation in cancer	65/1154	155/6297	4.1713e-12	6.54894e-10	5.37878e-10	CXCL8/MPO/LYL1/FLI1/NTRK1/CSF2/BIRC3/BCL2A1/ETV7/TRAF1/IGF1/IL6/PAX8/FLT1/CSF1R/PLAU/IGFBP3/GZMB/FEV/CCNA1/NR4A3/HIST1H3A/TMPRSS2/MMP3/MMP9/FOXO1/HMGA2/HIST1H3H/NFKB1/HIST1H3B/NGFR/ID2/ITGAM/IGF1R/H3F3B/IL1R2/ETV4/MYC/PER2/DOT1L/TGFBR2/IL2RB/NFKBIZ/WT1/MET/RUNX1/BAK1/ZEB1/MLLT3/MYCN/CCND2/TLX1/RUNX1T1/MDM2/SPINT1/EYA1/BCL6/KLF3/DDIT3/NUPR1/LDB1/HOXA9/CDKN2C/DDB2/CDKN1A	65
hsa04061	Viral protein interaction with cytokine and cytokine receptor	34/1154	59/6297	1.51484e-11	1.58553e-09	1.30223e-09	CXCR3/IL10/CXCL6/CXCL8/CXCL10/CCR4/CCL20/IL24/CXCL3/CCL2/CCL7/TNFSF14/IL2RG/IL6/CCR7/CCR1/IL34/CSF1R/CCL4/CCL3/CXCL11/TNFRSF1B/IL18R1/IL2RB/IL6R/CCR3/CXCR2/IL22RA1/IL10RA/CXCL12/CCL28/CCR10/TNFRSF14/XCL1	34
hsa04080	Neuroactive ligand-receptor interaction	69/1154	208/6297	1.31813e-07	1.03473e-05	8.49849e-06	LPAR6/CHRND/F2RL3/CHRNA9/UCN2/CHRM5/GRIN2A/CNR2/P2RY6/CHRM2/PDYN/SSTR3/GRPR/ADRA1D/OPRD1/S1PR1/NTSR1/MC5R/VIP/APLNR/BDKRB2/MCHR1/CALCR/GHRL/ADRA2B/GRIK1/TACR3/NR3C1/P2RX1/PTGIR/TAC3/GRIN2D/ADM/GIPR/GRIK5/NPFFR1/KISS1/CHRM3/CHRNB2/DRD4/HRH1/SSTR2/HTR2A/DRD1/GRIN2C/OPRK1/ADRB3/GABRR2/GRIA2/ADORA2A/HTR2C/CALCRL/ADORA1/GNRH2/F2RL2/NPY1R/P2RY2/GRM5/GABRG1/GHR/ADRA1A/S1PR4/P2RX7/LPAR2/THRA/P2RX6/F2R/GL…	69
hsa05200	Pathways in cancer	129/1154	469/6297	2.37385e-07	1.49078e-05	1.22441e-05	LPAR6/CXCL8/IFNG/FASLG/NTRK1/BIRC3/TRAF1/F2RL3/HEYL/IGF1/IL23R/WNT1/ESR1/KLK3/FGF3/IL2RG/IL6/CAMK2A/ADCY8/PAX8/IL23A/LAMA3/FGF5/CSF2RB/CSF1R/TGFA/MMP1/TCF7/GNG11/FZD10/BDKRB2/IL12RB1/CCNA1/LAMB3/MMP9/KITLG/ITGA2/PDGFB/FOXO1/HHIP/WNT7B/IL7R/TXNRD1/PIK3CD/NFKB1/IL4R/FGF1/LAMA4/ETS1/NFKB2/RAC2/LAMC2/PPARD/VEGFC/CAMK2B/IGF1R/FZD8/WNT10A/FGF4/PDGFRB/WNT7A/FGF2/SLC2A1/BMP2/NOTCH4/TRAF3/MYC/EGFR/CDKN2B/…	129
hsa04151	PI3K-Akt signaling pathway	90/1154	303/6297	5.31032e-07	2.77907e-05	2.2825e-05	LPAR6/CSF3/FASLG/NTRK1/EREG/RELN/IGF1/ANGPT2/FGF3/IL2RG/IL6/AREG/VTN/CHRM2/OSM/FLT1/LAMA3/FGF5/CSF1R/TGFA/GNG11/ITGB6/THBS1/NR4A1/LAMB3/KITLG/COL2A1/ITGA2/PDGFB/IL7R/ITGA8/ITGB3/PIK3CD/NFKB1/COL9A3/IL4R/FGF1/COL6A3/LAMA4/COL1A2/SGK1/PIK3CG/LAMC2/NGFR/VEGFC/IGF1R/FGF4/PDGFRB/FGF2/NGF/MYC/EGFR/LAMB1/MCL1/NTRK2/IL2RB/FGF18/COL4A1/FN1/TNXB/TNC/COL6A1/ITGA11/ITGA6/MET/IL6R/PPP2R3A/PDGFC/COL4A6/FGF21/E…	90
hsa04512	ECM-receptor interaction	31/1154	78/6297	7.15148e-06	0.000320795	0.000263476	RELN/DMP1/VTN/LAMA3/SV2B/ITGB6/THBS1/LAMB3/COL2A1/ITGA2/ITGA8/SDC4/ITGB3/COL9A3/COL6A3/LAMA4/COL1A2/LAMC2/CD44/SV2C/LAMB1/COL4A1/FN1/TNXB/TNC/COL6A1/ITGA11/ITGA6/COL4A6/GP6/ITGA2B	31
hsa04630	JAK-STAT signaling pathway	42/1154	122/6297	1.39737e-05	0.000500395	0.000410985	CSF3/IL10/IFNG/CSF2/IL24/IL11/IL23R/IFNE/IL2RG/IL6/OSM/IL23A/CSF2RB/PTPN6/IL12RB1/PDGFB/IL7R/PIK3CD/IL4R/LIF/MPL/PDGFRB/IL27RA/MYC/EGFR/MCL1/IL2RB/CNTF/SOCS2/IL6R/IL22RA1/PIK3R3/CCND2/IL10RA/IFNLR1/IL21R/SOCS3/TSLP/GHR/EPOR/BCL2/CDKN1A	42
hsa05226	Gastric cancer	44/1154	130/6297	1.43425e-05	0.000500395	0.000410985	SHC4/MUC2/WNT1/FGF3/FGF5/TCF7/FZD10/WNT7B/PIK3CD/FGF1/FZD8/WNT10A/FGF4/WNT7A/FGF2/MYC/EGFR/CDKN2B/TGFBR2/FGF18/FRAT2/SMAD3/MET/BAK1/WNT9A/FGF21/E2F2/PIK3R3/TGFB3/WNT11/TCF7L1/FGF9/GAB1/CCNE2/SHC3/CCNE1/DDB2/DVL2/LRP6/E2F1/BCL2/CDKN1A/RARB/WNT10B	44
hsa04020	Calcium signaling pathway	51/1154	164/6297	4.32752e-05	0.00123901	0.00101762	CHRM5/GRIN2A/CAMK2A/ADCY8/CHRM2/GRPR/ADRA1D/CACNA1F/NTSR1/BDKRB2/SLC8A1/MYLK4/SPHK1/TACR3/P2RX1/ATP2B2/GRIN2D/GNA15/CAMK2B/PDGFRB/EGFR/PDE1C/ATP2B1/CHRM3/PPIF/SLC8A2/ADCY2/HRH1/RYR2/ITPKC/HTR2A/DRD1/GRIN2C/ERBB3/ADRB3/PLCE1/NOS2/CACNA1B/ADORA2A/HTR2C/ITPKB/ATP2B3/GRM5/ADRA1A/GNAQ/P2RX7/P2RX6/ADCY9/F2R/CAMK2G/MCU	51
hsa04014	Ras signaling pathway	60/1154	202/6297	4.3454e-05	0.00123901	0.00101762	PLA2G2D/FASLG/NTRK1/SHC4/IGF1/ANGPT2/FGF3/GRIN2A/FLT1/FGF5/CSF1R/TGFA/GNG11/KITLG/PDGFB/PIK3CD/NFKB1/FGF1/RASA3/ETS1/RAC2/NGFR/ETS2/VEGFC/IGF1R/FGF4/PDGFRB/FGF2/NGF/SYNGAP1/RASGRF1/EGFR/LAT/KSR2/NTRK2/RASSF5/FGF18/MET/PDGFC/RIN1/FGF21/PAK5/PIK3R3/RAPGEF5/PLCE1/RAC3/JMJD7-PLA2G4B/NTF4/PLD1/NTF3/PLA2G6/FGF9/GAB1/KSR1/INSR/GAB2/SHC3/TBK1/PLA2G4B/RASGRP4	60
hsa04015	Rap1 signaling pathway	58/1154	194/6297	4.73506e-05	0.00123901	0.00101762	F2RL3/IGF1/ANGPT2/LCP2/FGF3/GRIN2A/ADCY8/FLT1/FGF5/CSF1R/THBS1/KITLG/SIPA1L2/PDGFB/MAP2K3/ITGB3/PIK3CD/FGF1/RAC2/NGFR/VEGFC/ITGAM/IGF1R/FGF4/PDGFRB/FGF2/NGF/VASP/ID1/EGFR/DOCK4/LAT/ADCY2/RASSF5/FGF18/MAPK13/MET/PDGFC/SKAP1/FGF21/PIK3R3/RAPGEF5/PLCE1/RAC3/ADORA2A/PARD6G/PRKD1/GNAO1/ITGA2B/FGF9/INSR/MAGI3/GNAQ/LPAR2/PARD6A/ADCY9/F2R/GNAI1	58
hsa05322	Systemic lupus erythematosus	29/1154	78/6297	6.11701e-05	0.00147749	0.0012135	HIST1H2BG/IL10/IFNG/HIST1H2AC/HIST1H2BC/HIST1H4D/HIST1H2BF/HIST1H2BM/GRIN2A/HIST1H2AJ/HIST1H2BJ/HIST2H2AB/HIST1H2AH/HIST2H4B/HIST1H4H/HIST1H2BK/HIST1H2AI/HIST1H3A/HIST1H4J/CD28/HIST1H3H/HIST1H2BD/HIST1H3B/H3F3B/HIST1H4E/HIST2H2BE/HIST4H4/HIST2H2AC/HIST1H2BE	29
hsa05034	Alcoholism	43/1154	138/6297	0.000161262	0.00346114	0.0028427	HIST1H2BG/SHC4/HIST1H2AC/HIST1H2BC/HIST1H4D/HIST1H2BF/HIST1H2BM/GRIN2A/HIST1H2AJ/PDYN/HIST1H2BJ/TH/HIST2H2AB/HIST1H2AH/HIST2H4B/HIST1H4H/GNG11/HIST1H2BK/HIST1H2AI/HIST1H3A/HIST1H4J/FOSB/HIST1H3H/HIST1H2BD/MAOB/HIST1H3B/GRIN2D/H3F3B/HIST1H4E/CAMKK1/HIST2H2BE/HIST4H4/NTRK2/HIST2H2AC/HIST1H2BE/DRD1/GRIN2C/HDAC10/ADORA2A/GNAO1/SHC3/GNAI1/HDAC11	43
hsa04657	IL-17 signaling pathway	28/1154	78/6297	0.000165341	0.00346114	0.0028427	CSF3/CXCL6/CXCL8/CXCL10/IFNG/CCL20/CSF2/IL1B/CXCL3/CCL2/CCL7/IL6/TNFAIP3/MMP1/MMP3/MMP9/FOSB/MMP13/MUC5AC/FOSL1/NFKB1/IKBKE/IL17RE/TRAF3/MAPK13/JUND/TBK1/IL17RB	28
hsa04010	MAPK signaling pathway	74/1154	275/6297	0.000212524	0.00417078	0.00342555	FASLG/NTRK1/EREG/IGF1/IL1B/DUSP4/ANGPT2/FGF3/AREG/FLT1/CACNA1F/FGF5/CSF1R/TGFA/RELB/DUSP5/NR4A1/PTPN7/CACNG8/MKNK1/KITLG/PPP5D1/PDGFB/HSPA2/HSPA6/MAP2K3/NFKB1/FGF1/FLNC/DUSP2/NFKB2/RAC2/NGFR/VEGFC/IGF1R/MAPK8IP2/FGF4/PDGFRB/FGF2/NGF/RASGRF1/MYC/PTPRR/EGFR/CACNB4/NTRK2/TGFBR2/FGF18/DUSP7/MAPK13/MET/PDGFC/MAP3K14/FGF21/ERBB3/RAC3/CACNB2/JMJD7-PLA2G4B/TGFB3/CACNA1B/NTF4/DUSP8/NTF3/DDIT3/FGF9/MAP3K3/…	74
hsa05224	Breast cancer	40/1154	128/6297	0.000252347	0.004661	0.00382818	SHC4/HEYL/IGF1/WNT1/ESR1/FGF3/FGF5/TCF7/FZD10/WNT7B/PIK3CD/FGF1/NFKB2/IGF1R/FZD8/WNT10A/FGF4/WNT7A/FGF2/NOTCH4/MYC/EGFR/FGF18/FRAT2/BAK1/WNT9A/FGF21/E2F2/PIK3R3/WNT11/TCF7L1/FGF9/JAG2/SHC3/DDB2/DVL2/LRP6/E2F1/CDKN1A/WNT10B	40
hsa05222	Small cell lung cancer	30/1154	88/6297	0.000281195	0.00490528	0.00402881	BIRC3/TRAF1/LAMA3/LAMB3/ITGA2/PIK3CD/NFKB1/LAMA4/LAMC2/TRAF3/MYC/CDKN2B/LAMB1/COL4A1/FN1/ITGA6/BAK1/COL4A6/E2F2/PIK3R3/NOS2/APAF1/ITGA2B/CCNE2/CCNE1/DDB2/E2F1/BCL2/CDKN1A/RARB	30
hsa04064	NF-kappa B signaling pathway	30/1154	89/6297	0.000351339	0.00580633	0.00476886	CXCL8/VCAM1/BIRC3/BCL2A1/TRAF1/IL1B/CXCL3/TNFSF14/CARD14/TNFAIP3/LCK/PLAU/RELB/CCL4/EDARADD/NFKB1/NFKB2/ICAM1/LTB/TRAF3/LAT/CARD10/MAP3K14/EDA/PIDD1/CXCL12/LBP/EDA2R/PRKCQ/BCL2	30
hsa04640	Hematopoietic cell lineage	23/1154	63/6297	0.000470065	0.00702859	0.00577273	CSF3/CSF2/IL11/IL1B/IL6/MS4A1/CSF1R/KITLG/ITGA2/IL7R/ITGB3/IL4R/ANPEP/CD55/ITGAM/IL1R2/CD44/CD59/CD22/ITGA6/IL6R/ITGA2B/EPOR	23
hsa05218	Melanoma	23/1154	63/6297	0.000470065	0.00702859	0.00577273	IGF1/FGF3/FGF5/PDGFB/PIK3CD/FGF1/IGF1R/FGF4/PDGFRB/FGF2/EGFR/FGF18/MET/BAK1/PDGFC/FGF21/E2F2/PIK3R3/MDM2/FGF9/DDB2/E2F1/CDKN1A	23
hsa05215	Prostate cancer	31/1154	95/6297	0.000535574	0.0076441	0.00627826	IGF1/INSRR/KLK3/TGFA/TCF7/PLAU/SRD5A2/TMPRSS2/MMP3/MMP9/PDGFB/FOXO1/PIK3CD/NFKB1/IGF1R/IL1R2/PDGFRB/EGFR/PDGFC/ZEB1/E2F2/PIK3R3/MDM2/SPINT1/TCF7L1/CCNE2/CCNE1/E2F1/BCL2/AR/CDKN1A	31
hsa04913	Ovarian steroidogenesis	14/1154	33/6297	0.00112361	0.0153397	0.0125988	IGF1/HSD17B2/ADCY8/CYP1A1/CYP11A1/BMP6/CYP19A1/IGF1R/ADCY2/JMJD7-PLA2G4B/INSR/ADCY9/PLA2G4B/HSD17B7	14
hsa05165	Human papillomavirus infection	74/1154	292/6297	0.00140318	0.0183583	0.0150781	FASLG/HEYL/RELN/WNT1/MAML3/VTN/LAMA3/TCF7/ITGB6/OASL/FZD10/THBS1/CCNA1/LAMB3/COL2A1/ITGA2/FOXO1/WNT7B/ITGA8/ITGB3/PIK3CD/NFKB1/COL9A3/COL6A3/LAMA4/COL1A2/LAMC2/LFNG/MAML2/FZD8/WNT10A/PDGFRB/IKBKE/WNT7A/NOTCH4/TRAF3/EGFR/ATP6V0A2/LAMB1/COL4A1/FN1/TNXB/DLG3/TNC/COL6A1/MFNG/ITGA11/IRF1/ITGA6/BAK1/PPP2R3A/WNT9A/COL4A6/TLR3/PIK3R3/CCND2/LLGL2/PPP2R5B/WNT11/HES6/PARD6G/MDM2/TCF7L1/ITGA2B/MPP5/CCNE2/CCN…	74
hsa05217	Basal cell carcinoma	20/1154	56/6297	0.00148197	0.0186135	0.0152877	WNT1/TCF7/FZD10/HHIP/WNT7B/FZD8/WNT10A/WNT7A/BMP2/BAK1/WNT9A/WNT11/TCF7L1/BMP4/GLI3/SMO/DDB2/DVL2/CDKN1A/WNT10B	20
hsa04668	TNF signaling pathway	32/1154	105/6297	0.00161679	0.0195258	0.016037	CXCL6/VCAM1/CXCL10/CCL20/CSF2/BIRC3/TRAF1/IL1B/CXCL3/CCL2/IL6/TNFAIP3/BCL3/MMP3/MMP9/JUNB/MAP2K3/PIK3CD/NFKB1/LIF/VEGFC/ICAM1/TNFRSF1B/TRAF3/IL18R1/MAPK13/IRF1/MAP3K14/PIK3R3/SOCS3/CASP10/MAP3K8	32
hsa04610	Complement and coagulation cascades	20/1154	57/6297	0.00189756	0.0220679	0.0181248	SERPINB2/FGB/SERPIND1/F2RL3/F13B/F3/VTN/PLAU/BDKRB2/THBD/PLAUR/A2M/CD55/ITGAM/CD59/SERPINE1/CFHR3/F2RL2/CFD/F2R	20
hsa04750	Inflammatory mediator regulation of TRP channels	27/1154	86/6297	0.00226588	0.0243013	0.0199592	NTRK1/IGF1/IL1B/CAMK2A/ADCY8/BDKRB2/MAP2K3/PIK3CD/PRKCD/TRPM8/CAMK2B/NGF/ADCY2/HRH1/MAPK13/HTR2A/PIK3R3/JMJD7-PLA2G4B/HTR2C/PLA2G6/P2RY2/GNAQ/PRKCQ/ADCY9/ASIC2/PLA2G4B/CAMK2G	27
hsa04390	Hippo signaling pathway	41/1154	146/6297	0.00227163	0.0243013	0.0199592	WNT1/AREG/TCF7/FZD10/WNT7B/BMP6/FGF1/ID2/WWTR1/FZD8/WNT10A/WNT7A/ID1/BMP2/BMPR2/SNAI2/MYC/TGFBR2/CTGF/DLG3/SERPINE1/SMAD3/WWC1/WNT9A/BBC3/CCND2/AMOT/LLGL2/GDF5/TGFB3/WNT11/PARD6G/TCF7L1/BMP4/AJUBA/MPP5/PARD6A/LIMD1/DVL2/TP73/WNT10B	41
hsa05146	Amoebiasis	26/1154	82/6297	0.00232178	0.0243013	0.0199592	IL10/CXCL8/IFNG/CSF2/MUC2/IL1B/CXCL3/IL6/LAMA3/LAMB3/PIK3CD/NFKB1/LAMA4/COL1A2/GNA15/LAMC2/ITGAM/IL1R2/LAMB1/COL4A1/FN1/COL4A6/PIK3R3/TGFB3/NOS2/GNAQ	26
hsa05144	Malaria	13/1154	32/6297	0.00268439	0.0271903	0.022332	CSF3/IL10/CXCL8/VCAM1/IFNG/IL1B/CCL2/IL6/THBS1/PECAM1/ICAM1/MET/TGFB3	13
hsa05323	Rheumatoid arthritis	24/1154	75/6297	0.00293952	0.0284408	0.023359	CXCL6/CXCL8/IFNG/CCL20/CSF2/IL11/IL1B/CXCL3/CCL2/IL6/FLT1/IL23A/MMP1/MMP3/CD28/CCL3/CTLA4/ICAM1/LTB/ATP6V0A2/TGFB3/CXCL12/CTSK/ATP6V0A1	24
hsa04915	Estrogen signaling pathway	33/1154	113/6297	0.002989	0.0284408	0.023359	KRT23/KRT39/SHC4/KRT20/KRT33A/ESR1/KRT12/ADCY8/KRT34/TGFA/KRT33B/MMP9/HBEGF/HSPA2/HSPA6/KRT17/KRT9/PIK3CD/PRKCD/EGFR/ADCY2/KRT18/KCNJ5/KRT15/KCNJ3/PIK3R3/GNAO1/GNAQ/SHC3/ADCY9/GNAI1/BCL2/NCOA2	33
hsa04510	Focal adhesion	50/1154	191/6297	0.00401967	0.0361709	0.0297079	SHC4/BIRC3/RELN/IGF1/VTN/MYL10/FLT1/LAMA3/ITGB6/THBS1/LAMB3/COL2A1/ITGA2/MYLK4/PDGFB/ITGA8/ITGB3/PIK3CD/COL9A3/COL6A3/LAMA4/FLNC/COL1A2/RAC2/LAMC2/VEGFC/IGF1R/PDGFRB/VASP/RASGRF1/EGFR/LAMB1/COL4A1/FN1/TNXB/ZYX/TNC/COL6A1/ITGA11/ITGA6/MET/PDGFC/COL4A6/PAK5/PIK3R3/CCND2/RAC3/ITGA2B/SHC3/BCL2	50
hsa05414	Dilated cardiomyopathy (DCM)	26/1154	85/6297	0.00403179	0.0361709	0.0297079	IGF1/ADCY8/CACNA1F/ITGB6/ACTC1/SLC8A1/CACNG8/TTN/DMD/ITGA2/ITGA8/ITGB3/DES/CACNB4/SLC8A2/ADCY2/TPM1/RYR2/ITGA11/ITGA6/CACNB2/TGFB3/SGCA/ITGA2B/CACNB3/ADCY9	26
hsa04670	Leukocyte transendothelial migration	29/1154	98/6297	0.00422293	0.0368333	0.030252	VCAM1/CLDN22/CLDN9/CLDN14/NCF4/MYL10/RHOH/MMP9/PIK3CD/CLDN23/PECAM1/RAC2/CLDN6/CDH5/ITGAM/ICAM1/CYBB/VASP/CLDN1/EZR/RASSF5/MAPK13/ITK/CYBA/PIK3R3/CXCL12/TXK/OCLN/GNAI1	29
hsa04934	Cushing syndrome	37/1154	134/6297	0.0049372	0.0418994	0.0344129	WNT1/CAMK2A/RASD1/ADCY8/CACNA1F/TCF7/FZD10/NR4A1/CYP11A1/WNT7B/PDE8B/CAMK2B/FZD8/WNT10A/WNT7A/KCNK3/EGFR/CDKN2B/ADCY2/WNT9A/AHR/E2F2/WNT11/TCF7L1/KCNA4/CCNE2/GNAQ/CCNE1/ADCY9/CDKN2C/GNAI1/DVL2/CAMK2G/E2F1/CDKN1A/PDE11A/WNT10B	37

## Sheet: kegg_S_specific
	ID	Description	GeneRatio	BgRatio	pvalue	p.adjust	qvalue	geneID	Count
hsa04060	hsa04060	Cytokine-cytokine receptor interaction	24/154	188/6297	1.56662e-11	3.47791e-09	2.53958e-09	TNFRSF12A/TNFRSF1B/TNFRSF9/IL4R/IL11/CSF2RB/CSF3/CCL7/CCL2/IL23A/IFNG/CCL20/FASLG/TNFSF14/CCR7/NGF/IL6/IL1RN/IL24/CSF2/TNFSF15/LTB/CCL4/CCL3	24
hsa05200	hsa05200	Pathways in cancer	30/154	469/6297	7.46835e-07	8.28987e-05	6.0533e-05	KITLG/TRAF1/CAMK2B/CAMK2A/FGF4/NFKB2/IL4R/TCF7/PDGFB/CSF2RB/IL23A/IFNG/PPARD/FGF1/PDGFRB/FASLG/WNT1/PAX8/EGLN3/WNT10A/IL6/FGF2/WNT9A/EGFR/WNT7A/ADCY8/BDKRB2/PIK3CD/WNT7B/TXNRD1	30
hsa04061	hsa04061	Viral protein interaction with cytokine and cytokine receptor	10/154	59/6297	1.28294e-06	9.49376e-05	6.93238e-05	TNFRSF1B/CCL7/CCL2/CCL20/TNFSF14/CCR7/IL6/IL24/CCL4/CCL3	10
hsa04630	hsa04630	JAK-STAT signaling pathway	13/154	122/6297	7.42696e-06	0.000412196	0.000300987	IL4R/IL11/PDGFB/CSF2RB/CSF3/IL23A/IFNG/PDGFRB/IL6/EGFR/IL24/CSF2/PIK3CD	13
hsa05323	hsa05323	Rheumatoid arthritis	10/154	75/6297	1.20997e-05	0.0004667	0.000340786	IL11/CCL2/IL23A/IFNG/CCL20/IL6/CSF2/CD28/LTB/CCL3	10
hsa05224	hsa05224	Breast cancer	13/154	128/6297	1.26135e-05	0.0004667	0.000340786	FGF4/NFKB2/TCF7/FGF1/WNT1/WNT10A/FGF2/WNT9A/EGFR/WNT7A/PIK3CD/SHC4/WNT7B	13
hsa04916	hsa04916	Melanogenesis	10/154	87/6297	4.54123e-05	0.00144022	0.00105165	KITLG/CAMK2B/CAMK2A/TCF7/WNT1/WNT10A/WNT9A/WNT7A/ADCY8/WNT7B	10
hsa05226	hsa05226	Gastric cancer	12/154	130/6297	7.13911e-05	0.0019811	0.00144661	FGF4/TCF7/FGF1/WNT1/WNT10A/FGF2/WNT9A/EGFR/WNT7A/PIK3CD/SHC4/WNT7B	12
hsa05144	hsa05144	Malaria	6/154	32/6297	0.000103903	0.00256295	0.00187148	CSF3/CCL2/IFNG/IL6/VCAM1/PECAM1	6
hsa04066	hsa04066	HIF-1 signaling pathway	10/154	98/6297	0.000126274	0.00280327	0.00204696	CAMK2B/CAMK2A/MKNK1/SERPINE1/IFNG/EGLN3/IL6/EGFR/CYBB/PIK3CD	10
hsa04668	hsa04668	TNF signaling pathway	10/154	105/6297	0.000224667	0.00453418	0.00331088	MAP3K14/TNFRSF1B/TRAF1/CCL2/CCL20/IRF1/IL6/VCAM1/CSF2/PIK3CD	10
hsa04064	hsa04064	NF-kappa B signaling pathway	9/154	89/6297	0.000296324	0.005482	0.00400298	MAP3K14/TRAF1/NFKB2/CARD10/RELB/TNFSF14/VCAM1/LTB/CCL4	9
hsa04934	hsa04934	Cushing syndrome	11/154	134/6297	0.000404768	0.00691219	0.00504731	CAMK2B/CAMK2A/TCF7/WNT1/WNT10A/WNT9A/EGFR/WNT7A/ADCY8/KCNK3/WNT7B	11
hsa04722	hsa04722	Neurotrophin signaling pathway	10/154	116/6297	0.000504803	0.00773444	0.00564772	CAMK2B/CAMK2A/SH2B3/FASLG/IRAK2/NGF/NFKBIE/PRKCD/PIK3CD/SHC4	10
hsa04933	hsa04933	AGE-RAGE signaling pathway in diabetic complications	9/154	96/6297	0.000522597	0.00773444	0.00564772	SERPINE1/CCL2/F3/IL6/VCAM1/PRKCD/CYBB/PIK3CD/THBD	9
hsa04670	hsa04670	Leukocyte transendothelial migration	9/154	98/6297	0.000608488	0.00844277	0.00616494	ITK/VCAM1/CLDN1/CYBB/RHOH/PIK3CD/CLDN9/CLDN23/PECAM1	9
hsa04062	hsa04062	Chemokine signaling pathway	11/154	145/6297	0.000791027	0.00987748	0.00721258	CCL7/CCL2/ITK/CCL20/CCR7/ADCY8/PRKCD/PIK3CD/SHC4/CCL4/CCL3	11
hsa05218	hsa05218	Melanoma	7/154	63/6297	0.000800877	0.00987748	0.00721258	FGF4/PDGFB/FGF1/PDGFRB/FGF2/EGFR/PIK3CD	7
hsa04725	hsa04725	Cholinergic synapse	9/154	104/6297	0.000937965	0.0109594	0.00800259	CAMK2B/CHAT/CAMK2A/SLC5A7/CHRM3/ADCY8/PIK3CD/KCNJ12/CHRM5	9
hsa05142	hsa05142	Chagas disease (American trypanosomiasis)	8/154	89/6297	0.00140821	0.0156311	0.0114139	SERPINE1/CCL2/IFNG/FASLG/IL6/BDKRB2/PIK3CD/CCL3	8
hsa05214	hsa05214	Glioma	7/154	70/6297	0.00150464	0.0156439	0.0114233	CAMK2B/CAMK2A/PDGFB/PDGFRB/EGFR/PIK3CD/SHC4	7
hsa04625	hsa04625	C-type lectin receptor signaling pathway	8/154	91/6297	0.00162629	0.0156439	0.0114233	MAP3K14/NFKB2/RELB/IL23A/IRF1/IL6/PRKCD/PIK3CD	8
hsa04080	hsa04080	Neuroactive ligand-receptor interaction	13/154	208/6297	0.00164807	0.0156439	0.0114233	GIPR/P2RX1/OPRD1/CHRM3/APLNR/UCN2/NPFFR1/BDKRB2/GRIK1/SSTR2/GRIN2A/CHRM5/SSTR3	13
hsa04915	hsa04915	Estrogen signaling pathway	9/154	113/6297	0.00169124	0.0156439	0.0114233	KRT33A/HBEGF/KRT34/KRT33B/EGFR/ADCY8/PRKCD/PIK3CD/SHC4	9
hsa04660	hsa04660	T cell receptor signaling pathway	8/154	95/6297	0.00214244	0.017886	0.0130605	MAP3K14/IFNG/ITK/NFKBIE/CSF2/PIK3CD/CD28/PDCD1	8
hsa04020	hsa04020	Calcium signaling pathway	11/154	164/6297	0.00215614	0.017886	0.0130605	CAMK2B/CAMK2A/P2RX1/PDGFRB/CHRM3/EGFR/ADCY8/BDKRB2/SPHK1/GRIN2A/CHRM5	11
hsa05205	hsa05205	Proteoglycans in cancer	12/154	189/6297	0.00217533	0.017886	0.0130605	CAMK2B/CAMK2A/HBEGF/FASLG/WNT1/WNT10A/FGF2/WNT9A/EGFR/WNT7A/PIK3CD/WNT7B	12
hsa05217	hsa05217	Basal cell carcinoma	6/154	56/6297	0.00229712	0.0182128	0.0132991	TCF7/WNT1/WNT10A/WNT9A/WNT7A/WNT7B	6
hsa04310	hsa04310	Wnt signaling pathway	10/154	143/6297	0.00251703	0.0192683	0.0140698	CAMK2B/CAMK2A/TCF7/DKK1/PPARD/WNT1/WNT10A/WNT9A/WNT7A/WNT7B	10
hsa01521	hsa01521	EGFR tyrosine kinase inhibitor resistance	7/154	77/6297	0.00261802	0.0193733	0.0141465	PDGFB/PDGFRB/IL6/FGF2/EGFR/PIK3CD/SHC4	7
hsa04657	hsa04657	IL-17 signaling pathway	7/154	78/6297	0.00281832	0.0196283	0.0143326	CSF3/CCL7/CCL2/IFNG/CCL20/IL6/CSF2	7
hsa04010	hsa04010	MAPK signaling pathway	15/154	275/6297	0.0028293	0.0196283	0.0143326	MAP3K14/KITLG/FGF4/NFKB2/MKNK1/PDGFB/RELB/FGF1/PDGFRB/FASLG/NGF/FGF2/EGFR/PTPRR/CACNB4	15
hsa05332	hsa05332	Graft-versus-host disease	4/154	26/6297	0.00338045	0.0227412	0.0166057	IFNG/FASLG/IL6/CD28	4
hsa05225	hsa05225	Hepatocellular carcinoma	10/154	151/6297	0.00373766	0.0238906	0.017445	TCF7/WNT1/WNT10A/WNT9A/EGFR/WNT7A/PIK3CD/SHC4/WNT7B/TXNRD1	10
hsa04014	hsa04014	Ras signaling pathway	12/154	202/6297	0.00376653	0.0238906	0.017445	KITLG/FGF4/PDGFB/FGF1/PDGFRB/FASLG/NGF/FGF2/EGFR/PIK3CD/GRIN2A/SHC4	12
hsa05143	hsa05143	African trypanosomiasis	4/154	27/6297	0.00389388	0.0240123	0.0175338	IFNG/FASLG/IL6/VCAM1	4
hsa04640	hsa04640	Hematopoietic cell lineage	6/154	63/6297	0.00417919	0.0250752	0.01831	KITLG/IL4R/IL11/CSF3/IL6/CSF2	6
hsa04072	hsa04072	Phospholipase D signaling pathway	9/154	131/6297	0.00461562	0.0269649	0.0196899	KITLG/CYTH4/PDGFB/PDGFRB/EGFR/ADCY8/PIK3CD/SPHK1/SHC4	9
hsa04750	hsa04750	Inflammatory mediator regulation of TRP channels	7/154	86/6297	0.00487372	0.0275997	0.0201534	CAMK2B/CAMK2A/NGF/ADCY8/PRKCD/BDKRB2/PIK3CD	7
hsa05165	hsa05165	Human papillomavirus infection	15/154	292/6297	0.00497292	0.0275997	0.0201534	TCF7/MFNG/LFNG/PDGFRB/FASLG/WNT1/IRF1/WNT10A/ITGA11/WNT9A/EGFR/WNT7A/PIK3CD/MAML2/WNT7B	15
hsa04650	hsa04650	Natural killer cell mediated cytotoxicity	7/154	87/6297	0.00519394	0.0281233	0.0205357	IFNG/FASLG/CSF2/PIK3CD/SHC4/SH2D1B/KLRC2	7
hsa04015	hsa04015	Rap1 signaling pathway	11/154	194/6297	0.00772067	0.0408092	0.0297991	KITLG/FGF4/PDGFB/FGF1/PDGFRB/NGF/FGF2/EGFR/ADCY8/PIK3CD/GRIN2A	11
hsa05215	hsa05215	Prostate cancer	7/154	95/6297	0.00835534	0.0431369	0.0314987	TCF7/PDGFB/PDGFRB/EGFR/PIK3CD/TMPRSS2/SRD5A2	7
hsa04810	hsa04810	Regulation of actin cytoskeleton	11/154	197/6297	0.00862515	0.0435178	0.0317769	FGF4/PDGFB/FGF1/PDGFRB/CHRM3/ITGA11/FGF2/EGFR/BDKRB2/PIK3CD/CHRM5	11
hsa04550	hsa04550	Signaling pathways regulating pluripotency of stem cells	8/154	121/6297	0.00931329	0.0459456	0.0335496	TCF7/WNT1/WNT10A/FGF2/WNT9A/WNT7A/PIK3CD/WNT7B	8

## Sheet: GO_M_specific
	ID	Description	GeneRatio	BgRatio	pvalue	p.adjust	qvalue	geneID	Count
GO:1902850	GO:1902850	microtubule cytoskeleton organization involved in mitosis	30/796	127/14183	1.12918e-11	4.9808e-08	4.85427e-08	TACC3/SPDL1/MAP4/NDE1/NDC80/AURKA/TPX2/KIF4A/SUN2/CENPA/CDC20/NEK2/STAG1/GPSM2/TUBGCP3/CCNB1/PSRC1/BORA/CDK5RAP2/NUF2/MCPH1/SPC25/CCSAP/RACGAP1/CLASP2/ABRAXAS2/PLK1/CHEK2/SAPCD2/MZT1	30
GO:0140014	GO:0140014	mitotic nuclear division	44/796	271/14183	1.58627e-10	3.49851e-07	3.40964e-07	CDC27/NCAPD2/TACC3/SPDL1/CTDP1/NDE1/SPAG5/NDC80/AURKA/TPX2/KIF4A/UBE2S/TENT4A/CDC20/NEK2/STAG1/NEK6/KIF18A/TUBGCP3/DLGAP5/KNSTRN/SGO1/CCNB1/PSRC1/CDCA8/BORA/CDK5RAP2/NUF2/CCNA2/CCNB3/CCSAP/BUB1B/CCNB2/RACGAP1/LRP5/CLASP2/MAD2L1/ABRAXAS2/PLK1/BUB1/PPP2R2D/CHMP6/CHEK2/MZT1	44
GO:0043547	GO:0043547	positive regulation of GTPase activity	49/796	358/14183	5.8341e-09	5.12383e-06	4.99367e-06	DVL2/DEPDC1/RABEP1/RANBP3/DEPDC1B/TBC1D22A/TBC1D22B/TBC1D1/ARHGAP10/DOCK9/NPRL3/TSC2/SYDE1/RIC1/RGP1/RAPGEF1/ARHGAP21/ECT2/SOS1/CHN1/AFDN/TBC1D5/TBC1D14/MTSS1L/ARHGAP32/DOCK10/TBC1D4/PREB/FAM13A/ARHGAP17/BCAS3/PKP4/IQSEC1/RASA1/USP6NL/DOCK1/AGAP1/ARHGAP35/DVL3/RACGAP1/STXBP5/ARHGAP12/CCDC125/RASA3/RALGAPA2/TBC1D9B/ARHGAP11A/ARHGAP19/SRGAP2	49
GO:0007052	GO:0007052	mitotic spindle organization	24/796	109/14183	5.90206e-09	5.12383e-06	4.99367e-06	TACC3/MAP4/NDC80/AURKA/TPX2/KIF4A/SUN2/CDC20/NEK2/STAG1/GPSM2/TUBGCP3/CCNB1/PSRC1/BORA/NUF2/SPC25/CCSAP/RACGAP1/CLASP2/ABRAXAS2/PLK1/CHEK2/MZT1	24
GO:0043087	GO:0043087	regulation of GTPase activity	55/796	427/14183	6.16002e-09	5.12383e-06	4.99367e-06	DVL2/DEPDC1/RABEP1/RANBP3/DEPDC1B/TBC1D22A/TBC1D22B/TBC1D1/ARHGAP10/DOCK9/NPRL3/TSC2/SYDE1/RIC1/RGP1/RAPGEF1/ARHGAP21/ECT2/SOS1/MKKS/CHN1/AFDN/TBC1D5/TBC1D14/MTSS1L/SBF2/ARHGAP32/DOCK10/TBC1D4/RDX/PREB/FAM13A/ARHGAP17/BCAS3/PKP4/IQSEC1/RASA1/USP6NL/DOCK1/AGAP1/ARHGAP35/GPSM1/DVL3/RACGAP1/STXBP5/ARHGAP12/CRK/CCDC125/RASA3/RALGAPA2/TBC1D9B/MTOR/ARHGAP11A/ARHGAP19/SRGAP2	55
GO:0000280	GO:0000280	nuclear division	51/796	384/14183	7.96512e-09	5.12383e-06	4.99367e-06	CDC27/NCAPD2/TACC3/SPDL1/CTDP1/NDE1/SPAG5/NDC80/AURKA/TPX2/KIF4A/UBE2S/TENT4A/CDC20/NEK2/RPA2/STAG1/NEK6/MND1/KIF18A/CKS2/TUBGCP3/DLGAP5/KNSTRN/SGO1/CCNB1/PSRC1/SPIRE1/CDCA8/BORA/CDK5RAP2/NUF2/CCNA2/CCNB3/CCSAP/BUB1B/CCNB2/RACGAP1/LRP5/SGO2/CLASP2/MAD2L1/SUN1/ABRAXAS2/PLK1/BUB1/PPP2R2D/CHMP6/CHEK2/MZT1/RAD21L1	51
GO:0007051	GO:0007051	spindle organization	30/796	164/14183	8.13122e-09	5.12383e-06	4.99367e-06	TACC3/MAP4/SPAG5/NDC80/AURKA/TPX2/KIF4A/EZR/SUN2/SENP6/CEP72/CDC20/NEK2/STAG1/NEK6/GPSM2/TUBGCP3/KNSTRN/CCNB1/PSRC1/BORA/NUF2/SPC25/CCSAP/RACGAP1/CLASP2/ABRAXAS2/PLK1/CHEK2/MZT1	30
GO:0048285	GO:0048285	organelle fission	54/796	423/14183	1.16305e-08	6.41277e-06	6.24986e-06	CDC27/NCAPD2/TACC3/SPDL1/CTDP1/NDE1/SPAG5/NDC80/AURKA/TPX2/KIF4A/UBE2S/TENT4A/CDC20/NEK2/RPA2/STAG1/NEK6/MND1/KIF18A/CKS2/TUBGCP3/DLGAP5/KNSTRN/SGO1/CCNB1/PSRC1/SPIRE1/CDCA8/BORA/CDK5RAP2/NUF2/CCNA2/CCNB3/CCSAP/BUB1B/CCNB2/RACGAP1/LRP5/SGO2/CLASP2/MAD2L1/SUN1/ABRAXAS2/TMEM135/PEX11A/PLK1/BUB1/PPP2R2D/CHMP6/CHEK2/MAPT/MZT1/RAD21L1	54
GO:0044772	GO:0044772	mitotic cell cycle phase transition	58/796	474/14183	1.56866e-08	7.6882e-06	7.49289e-06	CDC27/DBF4/TACC3/MNAT1/SPDL1/MYO16/FOXN3/CUL1/CDK14/CTDP1/HMMR/NDE1/GTSE1/NDC80/AURKA/CNOT3/TPX2/DYNLL1/RBL2/UBE2S/FOXM1/CEP72/MIIP/CDC20/NEK2/RPA2/CNTRL/NEK6/ESRRB/CIT/CKS2/DLGAP5/LATS1/CCNB1/BORA/ODF2/CDK5RAP2/RDX/NEDD1/KCNH5/RPTOR/CCNA2/PRIM2/CCNB3/NACC2/KAT14/BUB1B/CCNB2/CLASP2/MAD2L1/ORC5/PLK1/BUB1/BCL2/PPP2R2D/CHEK2/E2F4/PPME1	58
GO:0000819	GO:0000819	sister chromatid segregation	30/796	178/14183	5.66623e-08	2.49937e-05	2.43588e-05	CDC27/NCAPD2/TACC3/SPDL1/SPAG5/NDC80/KIF4A/CTCF/TENT4A/CDC20/NEK2/NEK6/KIF18A/DLGAP5/KNSTRN/SGO1/LATS1/CCNB1/PSRC1/CDCA8/CDK5RAP2/NUF2/BUB1B/RACGAP1/SGO2/MAD2L1/PLK1/BUB1/CHMP6/RAD21L1	30
GO:0007059	GO:0007059	chromosome segregation	40/796	293/14183	1.5957e-07	6.39877e-05	6.23623e-05	CDC27/NCAPD2/TACC3/SPDL1/PUM2/NDE1/NUP37/SPAG5/NDC80/BIRC5/KIF4A/CTCF/OIP5/TENT4A/ECT2/CDC20/NEK2/STAG1/NEK6/KIF18A/DLGAP5/KNSTRN/SGO1/LATS1/CCNB1/PSRC1/CDCA8/CDK5RAP2/NUF2/SPC25/BUB1B/RACGAP1/SGO2/MAD2L1/SUN1/ABRAXAS2/PLK1/BUB1/CHMP6/RAD21L1	40
GO:0000070	GO:0000070	mitotic sister chromatid segregation	26/796	151/14183	2.8035e-07	0.000103052	0.000100434	CDC27/NCAPD2/TACC3/SPDL1/SPAG5/NDC80/KIF4A/TENT4A/CDC20/NEK2/NEK6/KIF18A/DLGAP5/KNSTRN/SGO1/CCNB1/PSRC1/CDCA8/CDK5RAP2/NUF2/BUB1B/RACGAP1/MAD2L1/PLK1/BUB1/CHMP6	26
GO:0051983	GO:0051983	regulation of chromosome segregation	20/796	98/14183	4.0589e-07	0.000137722	0.000134223	CDC27/TACC3/SPDL1/PUM2/SPAG5/NDC80/CTCF/ECT2/CDC20/NEK2/NEK6/DLGAP5/KNSTRN/CCNB1/CDK5RAP2/BUB1B/RACGAP1/MAD2L1/PLK1/BUB1	20
GO:0000086	GO:0000086	G2/M transition of mitotic cell cycle	29/796	195/14183	1.41219e-06	0.000444939	0.000433637	FOXN3/CUL1/CDK14/HMMR/NDE1/AURKA/TPX2/DYNLL1/FOXM1/CEP72/MIIP/NEK2/CNTRL/ESRRB/CIT/LATS1/CCNB1/BORA/ODF2/CDK5RAP2/NEDD1/KCNH5/CCNA2/CCNB3/KAT14/CCNB2/PLK1/CHEK2/PPME1	29
GO:0098813	GO:0098813	nuclear chromosome segregation	33/796	241/14183	1.80645e-06	0.000531217	0.000517722	CDC27/NCAPD2/TACC3/SPDL1/SPAG5/NDC80/KIF4A/CTCF/TENT4A/ECT2/CDC20/NEK2/NEK6/KIF18A/DLGAP5/KNSTRN/SGO1/LATS1/CCNB1/PSRC1/CDCA8/CDK5RAP2/NUF2/BUB1B/RACGAP1/SGO2/MAD2L1/SUN1/ABRAXAS2/PLK1/BUB1/CHMP6/RAD21L1	33
GO:0044839	GO:0044839	cell cycle G2/M phase transition	30/796	214/14183	3.25558e-06	0.000897524	0.000874724	FOXN3/CUL1/CDK14/HMMR/NDE1/GTSE1/AURKA/TPX2/DYNLL1/FOXM1/CEP72/MIIP/NEK2/CNTRL/ESRRB/CIT/LATS1/CCNB1/BORA/ODF2/CDK5RAP2/NEDD1/KCNH5/CCNA2/CCNB3/KAT14/CCNB2/PLK1/CHEK2/PPME1	30
GO:0051294	GO:0051294	establishment of spindle orientation	9/796	25/14183	4.77618e-06	0.00123928	0.0012078	SPDL1/MAP4/NDE1/NDC80/CENPA/GPSM2/CDK5RAP2/MCPH1/SAPCD2	9
GO:0008608	GO:0008608	attachment of spindle microtubules to kinetochore	10/796	32/14183	6.10512e-06	0.001443	0.00140634	SPAG5/NDC80/ECT2/NEK2/KNSTRN/SGO1/CCNB1/NUF2/RACGAP1/ABRAXAS2	10
GO:0007091	GO:0007091	metaphase/anaphase transition of mitotic cell cycle	13/796	54/14183	6.45295e-06	0.001443	0.00140634	CDC27/TACC3/SPDL1/NDC80/CDC20/NEK6/DLGAP5/CCNB1/CDK5RAP2/BUB1B/MAD2L1/PLK1/BUB1	13
GO:0000132	GO:0000132	establishment of mitotic spindle orientation	8/796	20/14183	6.54272e-06	0.001443	0.00140634	SPDL1/NDE1/NDC80/CENPA/GPSM2/CDK5RAP2/MCPH1/SAPCD2	8
GO:0044784	GO:0044784	metaphase/anaphase transition of cell cycle	13/796	55/14183	8.02119e-06	0.00166855	0.00162616	CDC27/TACC3/SPDL1/NDC80/CDC20/NEK6/DLGAP5/CCNB1/CDK5RAP2/BUB1B/MAD2L1/PLK1/BUB1	13
GO:0051293	GO:0051293	establishment of spindle localization	10/796	33/14183	8.32194e-06	0.00166855	0.00162616	SPDL1/MAP4/NDE1/NDC80/CENPA/GPSM2/SPIRE1/CDK5RAP2/MCPH1/SAPCD2	10
GO:0010965	GO:0010965	regulation of mitotic sister chromatid separation	13/796	56/14183	9.91591e-06	0.0019017	0.00185339	CDC27/TACC3/SPDL1/NDC80/CDC20/NEK6/DLGAP5/CCNB1/CDK5RAP2/BUB1B/MAD2L1/PLK1/BUB1	13
GO:0051306	GO:0051306	mitotic sister chromatid separation	13/796	59/14183	1.81647e-05	0.00333853	0.00325372	CDC27/TACC3/SPDL1/NDC80/CDC20/NEK6/DLGAP5/CCNB1/CDK5RAP2/BUB1B/MAD2L1/PLK1/BUB1	13
GO:0007077	GO:0007077	mitotic nuclear envelope disassembly	6/796	12/14183	2.11638e-05	0.00359052	0.00349931	NEK6/CCNB1/LPIN1/PRKCA/CCNB2/PLK1	6
GO:0051988	GO:0051988	regulation of attachment of spindle microtubules to kinetochore	6/796	12/14183	2.11638e-05	0.00359052	0.00349931	SPAG5/ECT2/NEK2/KNSTRN/CCNB1/RACGAP1	6
GO:1905818	GO:1905818	regulation of chromosome separation	13/796	60/14183	2.20133e-05	0.00359632	0.00350497	CDC27/TACC3/SPDL1/NDC80/CDC20/NEK6/DLGAP5/CCNB1/CDK5RAP2/BUB1B/MAD2L1/PLK1/BUB1	13
GO:0051656	GO:0051656	establishment of organelle localization	48/796	463/14183	2.85874e-05	0.00450354	0.00438914	APBA2/RIPOR1/SPDL1/MAP4/AP3D1/PRKCZ/NDE1/SPAG5/NDC80/EZR/SUN2/DNAJC5/SNPH/DVL1/ARHGAP21/STX2/CENPA/KLHL12/KIF18A/GPSM2/MKKS/DLGAP5/RHOT1/CCNB1/PSRC1/SPIRE1/CDCA8/CDK5RAP2/PREB/SEC24B/NUF2/SNAPIN/SHROOM2/MCPH1/PEF1/CLASP2/FYCO1/SUN1/TRAPPC9/NLGN1/CHMP6/TRAK1/PIP5K1C/SAPCD2/PCLO/MAPT/ERC2/RAD21L1	48
GO:0040001	GO:0040001	establishment of mitotic spindle localization	8/796	24/14183	3.12451e-05	0.00475248	0.00463176	SPDL1/NDE1/NDC80/CENPA/GPSM2/CDK5RAP2/MCPH1/SAPCD2	8
GO:0051653	GO:0051653	spindle localization	10/796	38/14183	3.29075e-05	0.0048385	0.00471559	SPDL1/MAP4/NDE1/NDC80/CENPA/GPSM2/SPIRE1/CDK5RAP2/MCPH1/SAPCD2	10
GO:0050000	GO:0050000	chromosome localization	14/796	72/14183	3.9109e-05	0.00556483	0.00542346	SPDL1/NDE1/SPAG5/NDC80/NUP98/KIF18A/DLGAP5/CCNB1/PSRC1/CDCA8/NUF2/SUN1/CHMP6/RAD21L1	14
GO:0090224	GO:0090224	regulation of spindle organization	10/796	40/14183	5.32759e-05	0.00734375	0.00715719	TACC3/SPAG5/TPX2/SENP6/STAG1/GPSM2/PSRC1/BORA/CCSAP/PLK1	10
GO:0051225	GO:0051225	spindle assembly	17/796	104/14183	6.30386e-05	0.00842616	0.00821211	SPAG5/AURKA/TPX2/KIF4A/SENP6/CDC20/NEK2/STAG1/NEK6/GPSM2/TUBGCP3/CCSAP/RACGAP1/ABRAXAS2/PLK1/CHEK2/MZT1	17
GO:1901990	GO:1901990	regulation of mitotic cell cycle phase transition	37/796	337/14183	7.16957e-05	0.00878572	0.00856254	SPDL1/MYO16/FOXN3/CUL1/HMMR/NDE1/GTSE1/NDC80/AURKA/CNOT3/TPX2/DYNLL1/RBL2/CEP72/MIIP/CDC20/NEK2/RPA2/CNTRL/NEK6/DLGAP5/CCNB1/ODF2/CDK5RAP2/RDX/NEDD1/KCNH5/RPTOR/CCNB3/NACC2/BUB1B/MAD2L1/PLK1/BUB1/BCL2/CHEK2/E2F4	37
GO:0033047	GO:0033047	regulation of mitotic sister chromatid segregation	13/796	67/14183	7.51343e-05	0.00878572	0.00856254	CDC27/TACC3/SPDL1/NDC80/CDC20/NEK6/DLGAP5/CCNB1/CDK5RAP2/BUB1B/MAD2L1/PLK1/BUB1	13
GO:0007094	GO:0007094	mitotic spindle assembly checkpoint	9/796	34/14183	7.76793e-05	0.00878572	0.00856254	SPDL1/NDC80/CDC20/CCNB1/CDK5RAP2/BUB1B/MAD2L1/PLK1/BUB1	9
GO:0031577	GO:0031577	spindle checkpoint	9/796	34/14183	7.76793e-05	0.00878572	0.00856254	SPDL1/NDC80/CDC20/CCNB1/CDK5RAP2/BUB1B/MAD2L1/PLK1/BUB1	9
GO:0071173	GO:0071173	spindle assembly checkpoint	9/796	34/14183	7.76793e-05	0.00878572	0.00856254	SPDL1/NDC80/CDC20/CCNB1/CDK5RAP2/BUB1B/MAD2L1/PLK1/BUB1	9
GO:0071174	GO:0071174	mitotic spindle checkpoint	9/796	34/14183	7.76793e-05	0.00878572	0.00856254	SPDL1/NDC80/CDC20/CCNB1/CDK5RAP2/BUB1B/MAD2L1/PLK1/BUB1	9
GO:1901987	GO:1901987	regulation of cell cycle phase transition	39/796	366/14183	8.85064e-05	0.00976005	0.00951211	SPDL1/MYO16/FOXN3/CUL1/HMMR/NDE1/GTSE1/NDC80/AURKA/CNOT3/TPX2/DYNLL1/RBL2/CEP72/MIIP/CDC20/NEK2/RPA2/CNTRL/NEK6/DLGAP5/MEN1/CCNB1/ODF2/CDK5RAP2/RDX/NEDD1/KCNH5/RPTOR/CCNB3/NACC2/BUB1B/MAD2L1/STXBP4/PLK1/BUB1/BCL2/CHEK2/E2F4	39
GO:0030071	GO:0030071	regulation of mitotic metaphase/anaphase transition	11/796	51/14183	9.79553e-05	0.0102918	0.0100303	SPDL1/NDC80/CDC20/NEK6/DLGAP5/CCNB1/CDK5RAP2/BUB1B/MAD2L1/PLK1/BUB1	11
GO:0033045	GO:0033045	regulation of sister chromatid segregation	14/796	78/14183	9.79948e-05	0.0102918	0.0100303	CDC27/TACC3/SPDL1/NDC80/CTCF/CDC20/NEK6/DLGAP5/CCNB1/CDK5RAP2/BUB1B/MAD2L1/PLK1/BUB1	14
GO:0090307	GO:0090307	mitotic spindle assembly	12/796	60/14183	0.000103869	0.010655	0.0103844	TPX2/KIF4A/CDC20/NEK2/STAG1/TUBGCP3/CCSAP/RACGAP1/ABRAXAS2/PLK1/CHEK2/MZT1	12
GO:1902099	GO:1902099	regulation of metaphase/anaphase transition of cell cycle	11/796	52/14183	0.000118021	0.0118266	0.0115262	SPDL1/NDC80/CDC20/NEK6/DLGAP5/CCNB1/CDK5RAP2/BUB1B/MAD2L1/PLK1/BUB1	11
GO:0030010	GO:0030010	establishment of cell polarity	18/796	120/14183	0.00012265	0.0118266	0.0115262	CYTH3/SPDL1/MAP4/PRKCZ/MPP5/NDE1/CAMSAP3/NDC80/CENPA/PARD3B/GPSM2/NEK3/CDK5RAP2/BCAS3/MCPH1/PARD3/MPP7/SAPCD2	18
GO:0045841	GO:0045841	negative regulation of mitotic metaphase/anaphase transition	9/796	36/14183	0.000126015	0.0118266	0.0115262	SPDL1/NDC80/CDC20/CCNB1/CDK5RAP2/BUB1B/MAD2L1/PLK1/BUB1	9
GO:1902100	GO:1902100	negative regulation of metaphase/anaphase transition of cell cycle	9/796	36/14183	0.000126015	0.0118266	0.0115262	SPDL1/NDC80/CDC20/CCNB1/CDK5RAP2/BUB1B/MAD2L1/PLK1/BUB1	9
GO:0090630	GO:0090630	activation of GTPase activity	14/796	80/14183	0.000130088	0.0119546	0.0116509	TBC1D22A/TBC1D22B/TBC1D1/SYDE1/ECT2/TBC1D5/TBC1D14/MTSS1L/TBC1D4/BCAS3/USP6NL/CCDC125/RALGAPA2/TBC1D9B	14
GO:0051303	GO:0051303	establishment of chromosome localization	13/796	71/14183	0.00013983	0.0125875	0.0122678	SPDL1/NDE1/SPAG5/NDC80/KIF18A/DLGAP5/CCNB1/PSRC1/CDCA8/NUF2/SUN1/CHMP6/RAD21L1	13
GO:0030397	GO:0030397	membrane disassembly	6/796	16/14183	0.000151039	0.0130634	0.0127315	NEK6/CCNB1/LPIN1/PRKCA/CCNB2/PLK1	6
GO:0051081	GO:0051081	nuclear envelope disassembly	6/796	16/14183	0.000151039	0.0130634	0.0127315	NEK6/CCNB1/LPIN1/PRKCA/CCNB2/PLK1	6
GO:0051056	GO:0051056	regulation of small GTPase mediated signal transduction	33/796	301/14183	0.000178351	0.0149588	0.0145788	CYTH3/DEPDC1B/TRIO/ARHGAP10/TSC2/SYDE1/RAPGEF1/ARHGAP21/FOXM1/ECT2/SOS1/RHOT1/CHN1/CGNL1/ARHGAP32/RDX/PLCE1/FAM13A/ARHGAP17/IQSEC1/RASA1/CDC42SE2/ARHGAP35/RACGAP1/ARHGAP12/CRK/CCDC125/RASA3/RALGAPA2/ARHGAP11A/ITSN1/ARHGAP19/SRGAP2	33
GO:1901991	GO:1901991	negative regulation of mitotic cell cycle phase transition	22/796	168/14183	0.000179736	0.0149588	0.0145788	SPDL1/MYO16/FOXN3/CUL1/GTSE1/NDC80/AURKA/CNOT3/RBL2/MIIP/CDC20/RPA2/CCNB1/CDK5RAP2/NACC2/BUB1B/MAD2L1/PLK1/BUB1/BCL2/CHEK2/E2F4	22
GO:0070601	GO:0070601	centromeric sister chromatid cohesion	5/796	11/14183	0.000191241	0.015536	0.0151413	CTCF/SGO1/BUB1B/SGO2/BUB1	5
GO:1905819	GO:1905819	negative regulation of chromosome separation	9/796	38/14183	0.000197237	0.015536	0.0151413	SPDL1/NDC80/CDC20/CCNB1/CDK5RAP2/BUB1B/MAD2L1/PLK1/BUB1	9
GO:2000816	GO:2000816	negative regulation of mitotic sister chromatid separation	9/796	38/14183	0.000197237	0.015536	0.0151413	SPDL1/NDC80/CDC20/CCNB1/CDK5RAP2/BUB1B/MAD2L1/PLK1/BUB1	9
GO:0007088	GO:0007088	regulation of mitotic nuclear division	22/796	170/14183	0.000213474	0.0165199	0.0161002	CDC27/TACC3/SPDL1/NDC80/AURKA/CDC20/NEK2/STAG1/NEK6/DLGAP5/CCNB1/BORA/CDK5RAP2/CCNA2/CCNB3/CCSAP/BUB1B/CCNB2/LRP5/MAD2L1/PLK1/BUB1	22
GO:1901988	GO:1901988	negative regulation of cell cycle phase transition	23/796	182/14183	0.000220904	0.0168002	0.0163734	SPDL1/MYO16/FOXN3/CUL1/GTSE1/NDC80/AURKA/CNOT3/RBL2/MIIP/CDC20/RPA2/MEN1/CCNB1/CDK5RAP2/NACC2/BUB1B/MAD2L1/PLK1/BUB1/BCL2/CHEK2/E2F4	23
GO:0051304	GO:0051304	chromosome separation	14/796	86/14183	0.000286543	0.0214227	0.0208785	CDC27/NCAPD2/TACC3/SPDL1/NDC80/CDC20/NEK6/DLGAP5/CCNB1/CDK5RAP2/BUB1B/MAD2L1/PLK1/BUB1	14
GO:0070507	GO:0070507	regulation of microtubule cytoskeleton organization	22/796	174/14183	0.000298069	0.021913	0.0213564	TACC3/SPAG5/CAMSAP3/AURKA/TPX2/HDAC6/MID1/RANGRF/CHORDC1/SENP6/NEK2/STAG1/KIF18A/GPSM2/PSRC1/BORA/CDK5RAP2/MCPH1/CCSAP/CLASP2/PLK1/MAPT	22
GO:0007163	GO:0007163	establishment or maintenance of cell polarity	23/796	187/14183	0.000329074	0.0237958	0.0231913	CYTH3/SPDL1/MAP4/PRKCZ/MPP5/NDE1/CAMSAP3/NDC80/RPGRIP1L/ERBIN/CENPA/PARD3B/GPSM2/NEK3/CDK5RAP2/BCAS3/MCPH1/PARD3/MPP7/DLG5/ARHGAP35/CLASP2/SAPCD2	23
GO:0033048	GO:0033048	negative regulation of mitotic sister chromatid segregation	9/796	41/14183	0.000364397	0.0259251	0.0252665	SPDL1/NDC80/CDC20/CCNB1/CDK5RAP2/BUB1B/MAD2L1/PLK1/BUB1	9
GO:0032886	GO:0032886	regulation of microtubule-based process	24/796	202/14183	0.000413502	0.0289517	0.0282162	TACC3/SPAG5/CAMSAP3/AURKA/TPX2/HDAC6/MID1/RANGRF/CHORDC1/SENP6/NEK2/STAG1/KIF18A/GPSM2/MKKS/RHOT1/PSRC1/BORA/CDK5RAP2/MCPH1/CCSAP/CLASP2/PLK1/MAPT	24
GO:0007018	GO:0007018	microtubule-based movement	28/796	255/14183	0.000524082	0.0354462	0.0345458	MAP4/AP3D1/PRKCZ/NDE1/CAMSAP3/RFX3/DYNLL1/KIF4A/HDAC6/IFT74/SUN2/DNAL4/ARHGAP21/HSPA8/KIF20A/KIF18A/MKKS/DLGAP5/RHOT1/SNAPIN/CABYR/CCSAP/RACGAP1/KIF15/FYCO1/SUN1/TRAK1/MAPT	28
GO:0033046	GO:0033046	negative regulation of sister chromatid segregation	9/796	43/14183	0.000530367	0.0354462	0.0345458	SPDL1/NDC80/CDC20/CCNB1/CDK5RAP2/BUB1B/MAD2L1/PLK1/BUB1	9
GO:0051985	GO:0051985	negative regulation of chromosome segregation	9/796	43/14183	0.000530367	0.0354462	0.0345458	SPDL1/NDC80/CDC20/CCNB1/CDK5RAP2/BUB1B/MAD2L1/PLK1/BUB1	9
GO:0018210	GO:0018210	peptidyl-threonine modification	16/796	113/14183	0.000556564	0.0366419	0.0357111	HIPK2/AXIN1/PPP2R5D/MAP3K10/CSNK1G2/RPTOR/DCAF1/PARD3/PRKCA/DMTN/PLK1/BCL2/GRK2/GALNT11/STK39/MTOR	16
GO:0022406	GO:0022406	membrane docking	21/796	173/14183	0.000699749	0.0444841	0.043354	NDE1/DYNLL1/EZR/SNPH/RPGRIP1L/STX2/EXOC2/CEP72/NEK2/CNTRL/RAB3IP/ODF2/CDK5RAP2/EXOC6/NEDD1/EXOC6B/SCLT1/PLK1/RAB8A/C2CD3/TMEM216	21
GO:0031145	GO:0031145	anaphase-promoting complex-dependent catabolic process	8/796	36/14183	0.000705936	0.0444841	0.043354	CDC27/AURKA/UBE2S/CDC20/CCNB1/BUB1B/MAD2L1/PLK1	8
GO:0060236	GO:0060236	regulation of mitotic spindle organization	8/796	36/14183	0.000705936	0.0444841	0.043354	TACC3/TPX2/STAG1/GPSM2/PSRC1/BORA/CCSAP/PLK1	8
