# Supplementary material for: The S-phase-induced lncRNA SUNO1 promotes cell proliferation by controlling YAP1/Hippo signaling pathway
Source: eLife. 2020 Oct 27;9:e55102. doi: 10.7554/eLife.55102 (PMC7591261; doi:10.7554/eLife.55102)
Supplement: Supplementary file 5. — First sheet ‘all_phase_specific_with_TPM’ includes all 5162 phase-specific genes and their TPM values. Second sheet ‘2044_phase_specific_lncRNAs’ shows the list of 2044 lncRNAs only. The lncRNA categorization criteria are explained in detail in Supplementary file 1, last sheet, ‘biotype_of_24087_genes’. Statistics summarizing the categorization is listed in Figure 2—figure supplement 1A. [file elife-55102-supp5.xlsx]

## Sheet: all_phase_specific_with_TPM
phase	ensemble_id	gene_names	bio_type	TPM_G1_rep1	TPM_G1_rep2	TPM_G1S_rep1	TPM_G1S_rep2	TPM_S_rep1	TPM_S_rep2	TPM_G2_rep1	TPM_G2_rep2	TPM_M_rep1	TPM_M_rep2
G1	ENSG00000003436	TFPI	protein_coding	35.3625	34.3345	31.6054	32.887	34.8419	34.6004	24.2595	23.8981	22.2672	22.9171
G1	ENSG00000004139	SARM1	protein_coding	1.10852	1.15262	0.317959	0.525068	0.797307	0.81912	0.584009	0.194396	0.493927	0.40072
G1	ENSG00000004799	PDK4	protein_coding	0.747512	0.607426	0.346565	0.481066	0.764528	0.871963	0.393456	0.456159	0.454742	0.435289
G1	ENSG00000004948	CALCR	protein_coding	0.137722	0.174841	0.059487	0.049503	0.183778	0.112726	0.106242	0.119918	0.045952	0.081792
G1	ENSG00000005073	HOXA11	protein_coding	18.345	18.8676	13.0474	13.78	14.8625	14.8299	11.8278	11.835	9.1288	9.55284
G1	ENSG00000005483	KMT2E	protein_coding	26.4951	28.576	22.0757	23.256	15.3906	16.2783	29.3374	28.4368	19.1833	17.6968
G1	ENSG00000006210	CX3CL1	protein_coding	3.59407	3.70965	2.07762	2.42762	3.02471	9.09622	1.5408	3.63225	1.62012	2.3589
G1	ENSG00000006468	ETV1	protein_coding	3.04518	2.05613	1.83288	1.67043	0.813105	1.46836	1.96657	2.00399	1.20381	0.75079
G1	ENSG00000006652	IFRD1	protein_coding	64.9544	63.1065	45.6611	35.2973	41.9426	49.5168	34.4635	36.9276	38.6909	35.226
G1	ENSG00000006837	CDKL3	protein_coding	1.86299	1.32146	1.4588	0.859415	0.978669	0.892054	0.863455	1.45389	1.5513	1.83904
G1	ENSG00000008083	JARID2	protein_coding	36.2888	38.4351	13.8193	14.7381	19.697	21.0171	18.8318	18.8952	15.5763	15.3609
G1	ENSG00000008294	SPAG9	protein_coding	108.564	106.004	47.1262	50.5369	52.8363	62.7253	57.0233	59.8127	67.624	67.1305
G1	ENSG00000009724	MASP2	protein_coding	0.062857	0.182913	0.060717	0.012382	0.019671	0.090102	0.024699	0.058693	0.036885	0.065775
G1	ENSG00000010539	ZNF200	protein_coding	24.0548	23.2338	16.221	19.0535	19.6136	22.5844	21.7561	18.9403	12.438	10.4047
G1	ENSG00000010671	BTK	protein_coding	0.438842	0.304681	0.10469	0.124638	0.092186	0.081454	0.111589	0.105065	0.185537	0.084174
G1	ENSG00000018408	WWTR1	protein_coding	50.4081	59.7928	24.7971	31.375	51.2718	49.9999	36.4782	36.6923	24.3461	22.5599
G1	ENSG00000019549	SNAI2	protein_coding	40.5464	17.3291	19.237	5.66589	24.3143	26.7274	23.8879	20.4543	11.6958	3.58583
G1	ENSG00000019991	HGF	protein_coding	0.042224	0.09406	0.013467	0.009028	0.055336	0.052154	0	0.033552	0.003841	0
G1	ENSG00000022355	GABRA1	protein_coding	2.56641	3.74493	0.925771	0.689703	0.617296	0.756348	0.680117	0.868344	0.351919	0.296349
G1	ENSG00000023445	BIRC3	protein_coding	47.86	51.6793	2.52147	2.41697	30.5195	50.8763	2.31867	2.8166	3.4436	3.22426
G1	ENSG00000033100	CHPF2	protein_coding	8.82916	9.24316	5.95637	6.88806	8.75482	7.92564	7.12155	7.89086	4.39786	5.34511
G1	ENSG00000034152	MAP2K3	protein_coding	207.778	235.046	63.447	63.2885	156.776	172.796	50.2326	56.35	74.2346	84.747
G1	ENSG00000035115	SH3YL1	protein_coding	4.79837	3.81703	2.97546	2.68907	3.23056	2.83952	3.75984	3.13272	2.78274	3.07454
G1	ENSG00000037965	HOXC8	protein_coding	25.2677	27.6986	16.6538	16.3089	15.6282	17.1583	15.1761	15.8158	12.3284	11.7364
G1	ENSG00000041982	TNC	protein_coding	183.55	180.122	97.0653	118.605	160.011	167.162	155.478	164.61	115.318	122.898
G1	ENSG00000043039	BARX2	protein_coding	1.09755	0.856446	0.374234	0.373228	0.571191	0.476189	0.371496	0.305175	0.317609	0.588663
G1	ENSG00000048052	HDAC9	protein_coding	36.4971	28.2091	15.9043	10.7304	10.952	17.9709	7.40809	7.72394	9.69845	7.46492
G1	ENSG00000054598	FOXC1	protein_coding	17.4181	17.9162	9.01103	9.09192	12.5217	13.9847	7.16981	6.61464	4.13012	4.08584
G1	ENSG00000057468	MSH4	protein_coding	0.218706	0.224457	0.150977	0.137272	0.230148	0.141599	0.129478	0.208019	0.161667	0.124577
G1	ENSG00000057657	PRDM1	protein_coding	8.04519	7.98671	1.18887	0.758004	3.25001	3.7315	3.69775	4.07416	1.33515	1.18816
G1	ENSG00000057704	TMCC3	protein_coding	0.869697	0.889969	0.461547	0.426274	0.773978	0.76616	0.740451	0.845111	0.158935	0.198921
G1	ENSG00000058673	ZC3H11A	protein_coding	61.9406	84.034	62.3579	60.6213	58.357	58.8528	108.634	75.1549	71.7857	68.299
G1	ENSG00000059769	DNAJC25	protein_coding	19.5216	18.0994	8.84751	7.14761	11.8957	12.313	12.4141	12.7995	12.5816	12.1317
G1	ENSG00000059804	SLC2A3	protein_coding	18.7663	30.2353	21.3451	20.8832	12.9261	23.832	20.9807	22.556	7.6868	8.65725
G1	ENSG00000066422	ZBTB11	protein_coding	42.0877	40.2429	21.0737	22.281	17.4107	17.8891	25.2188	26.1907	24.6116	24.076
G1	ENSG00000067082	KLF6	protein_coding	33.4001	35.0825	14.1031	14.6586	17.6593	28.717	45.3784	23.3555	17.3306	8.46205
G1	ENSG00000070444	MNT	protein_coding	20.7216	21.1562	14.8353	12.4751	14.2022	12.6769	7.15614	7.5917	6.80343	7.23074
G1	ENSG00000071575	TRIB2	protein_coding	66.1693	63.671	22.5116	21.1125	24.6883	23.9075	25.9064	23.418	30.0113	35.0249
G1	ENSG00000073614	KDM5A	protein_coding	29.0672	28.5856	21.0495	22.3452	20.0875	20.694	24.4387	26.3157	18.5365	16.8562
G1	ENSG00000073737	DHRS9	protein_coding	0.142845	0.347919	0.133335	0.14547	0.147267	0.127723	0.209281	0.253995	0.00814	0.064731
G1	ENSG00000075426	FOSL2	protein_coding	156.223	161.237	77.5399	79.3142	101.318	112.114	64.9117	68.3631	64.9845	69.7338
G1	ENSG00000075429	CACNG5	protein_coding	0.164169	0.495965	0.116236	0.044248	0.122847	0.265333	0.188085	0.130784	0.168551	0.016669
G1	ENSG00000076248	UNG	protein_coding	53.5379	43.9847	32.2886	33.9209	24.0482	25.3599	21.1055	15.9817	22.2684	25.6663
G1	ENSG00000077044	DGKD	protein_coding	106.354	109.827	63.6871	61.2722	85.6442	95.9765	58.647	67.9586	51.0962	52.1315
G1	ENSG00000077585	GPR137B	protein_coding	28.6689	29.5589	23.2626	22.3921	26.9462	26.5243	24.8836	21.9141	14.9108	14.3758
G1	ENSG00000078142	PIK3C3	protein_coding	13.934	12.9009	8.94548	10.1191	9.9018	7.88368	10.9798	9.20954	5.60025	5.7146
G1	ENSG00000078237	TIGAR	protein_coding	71.9515	37.5015	26.1226	52.5342	36.1112	21.2854	41.2919	43.4309	17.5231	34.5519
G1	ENSG00000081189	MEF2C	protein_coding	2.7899	2.59034	2.12758	1.72503	1.63933	3.05988	0.859392	0.73471	1.43394	1.00627
G1	ENSG00000083093	PALB2	protein_coding	22.6453	22.7253	13.2671	14.6729	16.5118	16.8882	13.0392	14.7754	13.3075	13.4092
G1	ENSG00000083812	ZNF324	protein_coding	3.14528	2.38713	2.09212	2.01372	2.5051	6.21666	1.73524	1.48276	1.3445	1.40666
G1	ENSG00000083817	ZNF416	protein_coding	5.81589	5.91936	2.71087	2.76795	3.05428	2.86531	3.55792	3.42715	1.28446	1.28916
G1	ENSG00000086619	ERO1B	protein_coding	7.59521	6.80157	5.25425	4.57664	5.11051	5.66646	4.03334	4.39217	2.41456	2.70607
G1	ENSG00000086696	HSD17B2	protein_coding	0.495406	0.642366	0.098402	0.043204	0.53467	0.729317	0.556315	0.64497	0.058534	0.069062
G1	ENSG00000087074	PPP1R15A	protein_coding	87.5689	92.9327	44.0288	42.8091	41.2118	53.066	47.0509	56.4982	50.9271	50.7607
G1	ENSG00000087494	PTHLH	protein_coding	12.7484	12.5449	10.4592	6.85698	14.7667	18.1747	9.12972	9.04709	4.73993	3.13921
G1	ENSG00000087510	TFAP2C	protein_coding	0.109855	0.18181	0.023491	0	0.031681	0.060597	0.033901	0.042681	0.016209	0
G1	ENSG00000087589	CASS4	protein_coding	1.75537	2.03323	0.543501	0.73091	1.80861	2.42022	2.03063	1.89411	0.458478	0.624797
G1	ENSG00000088826	SMOX	protein_coding	41.231	36.6575	16.565	16.745	26.264	31.5381	22.7067	23.3231	25.3944	26.5734
G1	ENSG00000089116	LHX5	protein_coding	2.81642	2.73109	1.49574	1.62848	2.48558	2.43673	1.03841	1.0718	0.392397	0.63663
G1	ENSG00000090447	TFAP4	protein_coding	19.6444	19.7358	10.4886	10.5002	16.1598	18.4517	13.6846	14.1831	8.06842	7.35962
G1	ENSG00000090776	EFNB1	protein_coding	52.984	51.9039	33.9466	34.462	29.6203	29.5081	24.0473	24.5787	14.118	15.2139
G1	ENSG00000091010	POU4F3	protein_coding	0.491955	0.350323	0.322248	0.178929	0.362676	0.502689	0.349947	0.282064	0.270909	0.167806
G1	ENSG00000091409	ITGA6	protein_coding	151.132	127.697	72.3387	84.7611	131.938	142.77	135.451	141.262	92.3807	79.0838
G1	ENSG00000095739	BAMBI	protein_coding	13.5	12.6957	10.3539	9.83569	12.0899	11.0707	7.13292	7.83814	3.90707	4.05692
G1	ENSG00000095951	HIVEP1	protein_coding	17.5478	18.867	3.24286	3.30514	10.6997	5.39004	8.86714	8.21486	6.86661	3.51358
G1	ENSG00000099326	MZF1	protein_coding	10.2286	10.9315	6.29117	4.66492	6.39586	6.06399	9.04889	9.83515	3.76902	4.81773
G1	ENSG00000099954	CECR2	protein_coding	7.62657	6.20128	4.30544	5.20761	4.77448	5.06088	3.34829	3.36383	3.49474	3.62214
G1	ENSG00000100036	SLC35E4	protein_coding	38.6195	38.1963	18.8358	18.6218	34.1173	35.5924	27.3664	28.7272	13.4872	15.4969
G1	ENSG00000100068	LRP5L	protein_coding	22.8661	20.3124	13.4976	11.4694	14.1899	12.9227	14.0767	16.9889	10.7691	11.9928
G1	ENSG00000100292	HMOX1	protein_coding	37.6525	39.2037	20.7868	22.268	20.2754	19.3174	18.986	20.3683	8.26415	9.69048
G1	ENSG00000100297	MCM5	protein_coding	153.945	124.894	99.721	99.9749	85.8987	81.7603	62.0533	64.2927	83.9362	87.5629
G1	ENSG00000100335	MIEF1	protein_coding	41.1758	43.7652	27.3188	28.5095	36.16	40.1755	39.426	40.5393	24.9218	37.4434
G1	ENSG00000100483	VCPKMT	protein_coding	11.8707	8.09139	6.3163	9.23726	10.4979	11.5869	11.04	8.02222	5.75615	5.04957
G1	ENSG00000100505	TRIM9	protein_coding	4.07728	4.18348	2.61057	2.94385	3.85197	3.86224	2.75222	2.92332	1.74474	2.10066
G1	ENSG00000100739	BDKRB1	protein_coding	1.44578	1.86914	0.955868	0.913937	0.61198	0.615783	0.285952	0.527209	0.34375	0.274537
G1	ENSG00000100784	RPS6KA5	protein_coding	3.30344	2.71146	2.09915	3.07939	2.76368	1.43692	1.64179	2.451	0.874342	2.12898
G1	ENSG00000100906	NFKBIA	protein_coding	78.9821	92.2233	23.8138	29.015	32.0418	27.5407	11.9776	18.9515	8.45351	15.0501
G1	ENSG00000100985	MMP9	protein_coding	91.0611	85.4168	34.2205	32.5848	92.4614	95.9003	83.5814	88.2417	33.2533	34.0101
G1	ENSG00000101096	NFATC2	protein_coding	12.2791	14.9072	2.40288	2.6746	5.54908	5.8481	5.06479	5.84994	3.13145	3.12198
G1	ENSG00000101109	STK4	protein_coding	38.0159	38.5239	31.5975	38.2225	36.0632	43.0582	44.1716	41.1093	30.7871	26.2871
G1	ENSG00000101384	JAG1	protein_coding	42.0825	39.774	12.3933	12.3343	17.3499	18.4687	15.5362	16.0721	9.23214	9.56673
G1	ENSG00000101438	SLC32A1	protein_coding	0.265141	0.382545	0.060658	0.098221	0.256599	0.156351	0.061161	0.117127	0.134238	0.168566
G1	ENSG00000101654	RNMT	protein_coding	44.7744	54.7317	22.8352	41.6231	35.7916	41.5429	28.7584	44.1473	37.4818	34.6531
G1	ENSG00000102096	PIM2	protein_coding	2.15813	2.28887	2.40046	1.40824	2.66266	1.9604	1.78456	2.08298	0.806764	0.927297
G1	ENSG00000102554	KLF5	protein_coding	103.559	110.053	43.4506	44.147	55.4645	66.5297	36.8851	34.8927	27.2758	25.5772
G1	ENSG00000102804	TSC22D1	protein_coding	39.6887	44.5719	28.303	26.7845	29.5897	28.1714	24.817	24.6782	21.1119	24.153
G1	ENSG00000103056	SMPD3	protein_coding	2.13953	1.56844	0.287492	0.503882	0.455415	0.342383	0.524663	0.417792	0.161564	0.215542
G1	ENSG00000103855	CD276	protein_coding	57.4935	72.3862	47.0453	45.3838	66.713	58.9056	67.7273	42.9359	31.2443	30.2815
G1	ENSG00000104419	NDRG1	protein_coding	120.095	112.898	76.9041	77.7807	91.2534	108.208	71.1849	77.8936	49.8943	51.3823
G1	ENSG00000104691	UBXN8	protein_coding	18.0636	17.3118	9.56199	8.17754	10.7554	10.6308	14.6648	14.1243	12.5805	12.3953
G1	ENSG00000104951	IL4I1	protein_coding	2.96414	2.39542	0.69137	0.666815	2.57808	3.05518	1.69078	2.09124	0.934747	0.859913
G1	ENSG00000105204	DYRK1B	protein_coding	6.51398	7.07751	5.45401	4.13737	6.70331	6.22436	5.58757	5.55064	2.91119	2.86181
G1	ENSG00000105516	DBP	protein_coding	6.83091	6.88521	7.3346	8.26375	2.87574	2.77336	3.91071	3.8251	4.91853	4.79835
G1	ENSG00000105708	ZNF14	protein_coding	1.03488	1.10685	0.799872	0.882256	0.627188	0.577476	0.859564	0.751024	0.572036	0.509755
G1	ENSG00000105732	ZNF574	protein_coding	25.7244	29.8917	18.9601	19.6794	23.0319	24.253	23.1406	23.6688	11.498	12.5929
G1	ENSG00000105856	HBP1	protein_coding	35.9004	32.7897	16.4341	12.2794	15.0724	12.7646	17.0309	15.6181	15.4897	11.3683
G1	ENSG00000106080	FKBP14	protein_coding	54.0638	50.0654	36.3232	36.1183	37.675	39.675	37.0165	36.6871	27.1981	29.4994
G1	ENSG00000107159	CA9	protein_coding	1.89212	1.62804	0.147136	0.22781	0.169235	0.140802	0.192437	0.182667	0.470526	0.497459
G1	ENSG00000107338	SHB	protein_coding	59.9118	59.1306	35.2852	35.4061	45.5673	47.1706	32.6785	34.8195	39.6918	43.6705
G1	ENSG00000107485	GATA3	protein_coding	10.5264	11.4516	6.71822	5.89677	6.37799	7.38439	5.93681	4.5762	5.63314	6.47731
G1	ENSG00000107731	UNC5B	protein_coding	7.0156	6.87968	4.82885	5.2675	5.34341	4.90294	2.83006	2.78007	2.83229	3.15768
G1	ENSG00000107859	PITX3	protein_coding	0.189679	0.23891	0.064411	0.038924	0.041629	0.03574	0.059579	0.038244	0.019211	0.043004
G1	ENSG00000108001	EBF3	protein_coding	7.98687	8.18737	4.62379	5.07494	8.08662	9.74782	3.23495	4.16068	1.92293	1.61504
G1	ENSG00000108175	ZMIZ1	protein_coding	31.294	35.0219	21.7906	23.6977	21.6348	20.8814	17.0048	22.8669	20.6489	28.3426
G1	ENSG00000108306	FBXL20	protein_coding	6.65677	7.40783	3.41127	3.2481	2.20237	2.77423	2.66279	5.23448	2.87957	4.09381
G1	ENSG00000109133	TMEM33	protein_coding	86.2317	68.6506	52.7598	57.952	54.1068	51.6084	56.9482	64.9822	66.3359	53.2339
G1	ENSG00000109321	AREG	protein_coding	162.129	162.185	38.9301	39.3754	158.402	229.975	60.5587	67.4608	19.713	20.0686
G1	ENSG00000109670	FBXW7	protein_coding	36.6219	30.784	17.0297	18.7548	14.8646	15.6617	18.5314	19.7719	15.296	15.3387
G1	ENSG00000109851	DBX1	protein_coding	0.161017	0.221302	0	0	0.123177	0.140891	0.039216	0.01779	0.041993	0.018192
G1	ENSG00000110060	PUS3	protein_coding	10.5052	11.1963	6.7302	6.59481	5.54043	5.5941	7.06447	7.2655	6.21228	5.6278
G1	ENSG00000110841	PPFIBP1	protein_coding	59.2108	58.7874	34.0245	38.2626	54.4046	57.3909	49.8391	55.4413	40.0119	33.8756
G1	ENSG00000110848	CD69	protein_coding	0.13799	0.388124	0	0	0.040391	0.126534	0.087733	0.016308	0	0
G1	ENSG00000110852	CLEC2B	protein_coding	28.7791	24.6802	13.4737	14.1003	12.9284	13.3657	23.7466	18.7877	19.8996	18.2396
G1	ENSG00000111262	KCNA1	protein_coding	8.69399	9.89484	3.19798	3.44974	5.03931	5.48334	0.816133	0.696624	0.950712	1.0708
G1	ENSG00000111696	NT5DC3	protein_coding	10.675	10.7205	7.84118	8.19349	10.467	10.7674	10.458	10.4716	6.44507	7.14507
G1	ENSG00000111837	MAK	protein_coding	0.724877	0.731391	0.417711	0.360423	0.488828	0.513052	0.20889	0.322604	0.120207	0.132737
G1	ENSG00000111877	MCM9	protein_coding	12.9232	12.8745	9.08823	9.37152	6.79076	7.88604	5.20199	5.13687	6.55777	6.56252
G1	ENSG00000112175	BMP5	protein_coding	43.1351	41.477	20.7562	21.9512	29.2866	29.3598	18.4406	18.0437	16.2548	16.1039
G1	ENSG00000112245	PTP4A1	protein_coding	301.724	296.847	150.625	140.742	191.05	228.478	193.715	204.666	161.871	145.327
G1	ENSG00000112297	CRYBG1	protein_coding	1.09526	1.25612	0.673998	0.592447	1.04503	1.05223	0.956901	1.1059	0.765201	0.826386
G1	ENSG00000112299	VNN1	protein_coding	1.00829	0.886773	0.120808	0.145653	0.499156	0.702186	0.553646	0.481986	0.041067	0.04379
G1	ENSG00000112365	ZBTB24	protein_coding	13.8997	13.1226	7.32487	7.23751	10.0701	9.81368	9.36988	8.9648	6.18868	5.67206
G1	ENSG00000112773	TENT5A	protein_coding	13.8824	13.5737	8.32274	8.38411	6.41566	6.22623	4.60594	4.62382	3.0554	2.99319
G1	ENSG00000113163	COL4A3BP	protein_coding	13.6115	19.2674	6.71204	7.64917	7.40114	7.6414	7.53686	7.61142	9.73007	7.79381
G1	ENSG00000113369	ARRDC3	protein_coding	26.3517	22.0885	9.76403	10.403	15.853	13.1169	7.6485	6.72166	10.0321	10.2319
G1	ENSG00000113580	NR3C1	protein_coding	95.8508	112.06	22.2832	26.5739	56.3602	54.9814	39.8288	39.7872	36.4791	37.5112
G1	ENSG00000113742	CPEB4	protein_coding	11.2936	11.1957	6.25685	6.19759	7.92979	8.68098	9.42443	9.87232	4.35324	6.59558
G1	ENSG00000113916	BCL6	protein_coding	18.0333	18.3145	11.7504	11.1527	6.81771	6.62808	6.68759	6.22328	6.9918	6.60853
G1	ENSG00000114423	CBLB	protein_coding	6.22081	5.79458	3.62431	3.93038	5.29138	5.14138	2.31545	2.45246	2.17318	2.02557
G1	ENSG00000114739	ACVR2B	protein_coding	4.59096	3.82312	2.91524	2.93884	4.02123	3.41604	3.46529	3.36693	2.60918	2.43144
G1	ENSG00000114796	KLHL24	protein_coding	13.1502	12.9428	5.72347	5.64836	3.0175	2.95548	3.52193	3.15116	2.47944	2.93977
G1	ENSG00000115008	IL1A	protein_coding	2.30155	2.38749	1.06278	1.43851	1.36667	2.25489	0.886824	1.10138	0.204628	0.263935
G1	ENSG00000115461	IGFBP5	protein_coding	32.2598	32.3532	23.0878	24.1519	34.9955	27.8541	24.6941	21.3249	14.5492	14.8591
G1	ENSG00000115738	ID2	protein_coding	6.66947	6.71306	8.45536	2.79517	4.14419	4.78008	5.1378	9.41212	10.7436	10.6854
G1	ENSG00000115963	RND3	protein_coding	61.2113	68.0088	78.6002	57.6931	64.8053	71.5545	50.933	50.9712	72.0827	65.6491
G1	ENSG00000116285	ERRFI1	protein_coding	138.105	141.439	42.4969	48.8793	87.8609	133.665	53.7088	58.5123	54.8634	56.9909
G1	ENSG00000116604	MEF2D	protein_coding	67.6495	67.3164	22.5692	23.1731	31.3395	33.3668	27.1466	29.8454	26.9721	27.3454
G1	ENSG00000116717	GADD45A	protein_coding	164.179	162.958	93.9416	102.671	97.0214	101.73	71.0151	68.5324	57.6485	52.7513
G1	ENSG00000116819	TFAP2E	protein_coding	2.54047	2.52784	1.65838	1.29787	1.7332	1.9253	1.32243	1.67824	0.674152	0.657158
G1	ENSG00000117318	ID3	protein_coding	116.831	125.491	49.1681	47.0223	110.952	125.84	32.2784	42.1974	65.0462	69.5914
G1	ENSG00000117586	TNFSF4	protein_coding	1.39088	1.24274	0.396282	0.232759	0.337162	0.709403	0.857545	0.403558	0.230729	0.243967
G1	ENSG00000117597	UTP25	protein_coding	36.7983	38.3669	10.9542	12.3139	26.5244	30.6915	20.0158	20.515	18.487	18.054
G1	ENSG00000117707	PROX1	protein_coding	1.87058	1.18078	0.980275	1.32216	0.700963	1.12884	1.26031	1.0958	0.550975	0.583557
G1	ENSG00000117877	CD3EAP	protein_coding	78.671	81.4039	36.3954	34.5387	49.7591	54.3923	48.3634	53.1084	28.8289	40.3618
G1	ENSG00000118503	TNFAIP3	protein_coding	53.8288	60.5351	4.47177	3.99821	13.0762	18.6312	4.78719	6.50415	3.94051	4.43543
G1	ENSG00000118514	ALDH8A1	protein_coding	1.16195	0.984583	0.668975	0.595096	1.08839	0.925252	1.13302	1.25087	0.573853	0.544893
G1	ENSG00000118515	SGK1	protein_coding	31.4686	25.3219	9.05142	11.7245	16.772	19.3448	17.1884	20.7681	10.8127	11.0124
G1	ENSG00000118985	ELL2	protein_coding	85.8935	93.0767	34.0744	38.2789	91.57	113.698	50.998	53.611	38.8799	36.9699
G1	ENSG00000118997	DNAH7	protein_coding	0.526453	0.200335	0.051474	0.024954	0.083893	0.037908	0.07646	0.05338	0.054201	0.070866
G1	ENSG00000119042	SATB2	protein_coding	9.69736	9.84899	7.43982	6.63092	6.43288	6.84487	4.64765	5.32227	4.82096	5.20748
G1	ENSG00000119138	KLF9	protein_coding	14.7343	14.3758	9.78324	9.67652	10.6472	12.3073	7.39537	6.69065	3.77938	3.77124
G1	ENSG00000119508	NR4A3	protein_coding	18.06	19.0376	3.60391	3.51981	8.1508	12.7737	1.4295	1.87306	1.62274	1.94168
G1	ENSG00000119669	IRF2BPL	protein_coding	80.0494	74.8974	22.6937	22.2584	31.6145	30.2631	15.7648	15.4459	20.5381	24.8042
G1	ENSG00000119737	GPR75	protein_coding	7.25734	8.38246	5.97847	4.90004	5.16438	4.94485	8.06338	8.01849	4.35131	3.89151
G1	ENSG00000119866	BCL11A	protein_coding	16.6606	15.9565	9.55671	10.6711	11.1708	10.57	9.0732	8.69864	9.47256	10.7756
G1	ENSG00000119938	PPP1R3C	protein_coding	30.9462	26.3458	7.16231	8.40501	20.7663	21.4961	7.69835	8.23763	2.70818	2.48852
G1	ENSG00000119953	SMNDC1	protein_coding	125.579	84.3559	25.8088	27.2087	42.3892	43.1481	31.492	39.6273	33.7682	32.5545
G1	ENSG00000119986	AVPI1	protein_coding	41.9179	43.4185	18.8276	21.3259	21.8241	22.6392	12.6124	14.305	14.7935	15.434
G1	ENSG00000120071	KANSL1	protein_coding	20.6673	16.1488	15.2161	15.3162	16.4288	15.401	20.8246	19.8145	7.73989	8.07874
G1	ENSG00000120158	RCL1	protein_coding	36.7475	33.3466	10.1331	10.4435	17.5699	16.669	19.7519	20.4086	22.563	20.6381
G1	ENSG00000120690	ELF1	protein_coding	25.4877	24.7573	20.7343	23.9304	15.1453	16.137	15.5409	14.202	14.4819	14.5025
G1	ENSG00000120833	SOCS2	protein_coding	2.52246	2.54921	1.21174	1.06798	1.24158	1.71778	1.12812	1.21215	0.995235	1.00912
G1	ENSG00000120875	DUSP4	protein_coding	0.187054	0.126543	0.009708	0.023426	0.133909	0.152081	0.115989	0.118357	0.01633	0.006855
G1	ENSG00000120889	TNFRSF10B	protein_coding	98.6027	97.4764	71.499	58.421	84.5649	89.7089	95.5519	96.4586	44.413	39.8807
G1	ENSG00000120942	UBIAD1	protein_coding	34.9788	35.2925	20.3085	20.8216	41.8706	43.8196	35.0802	37.9599	16.3865	18.3862
G1	ENSG00000121406	ZNF549	protein_coding	6.78441	6.39624	5.26704	5.24833	4.65571	4.36887	6.33507	6.36733	2.04441	2.11359
G1	ENSG00000122641	INHBA	protein_coding	249.677	216.271	98.8606	101.421	146.242	197.295	133.608	168.814	27.5579	24.058
G1	ENSG00000122877	EGR2	protein_coding	2.97756	3.10884	1.97353	2.24742	1.86113	2.87464	0.999605	1.06075	0.394555	0.335005
G1	ENSG00000123095	BHLHE41	protein_coding	8.7581	9.17593	5.66816	5.92211	5.39975	4.92656	2.76123	1.94586	3.24153	3.152
G1	ENSG00000123358	NR4A1	protein_coding	66.7314	76.6803	24.8242	26.7892	54.6618	80.4344	10.663	9.63604	19.2015	23.2784
G1	ENSG00000124145	SDC4	protein_coding	459.732	440.192	207.108	209.382	498.009	548.823	182.857	213.406	238.83	246.799
G1	ENSG00000124171	PARD6B	protein_coding	3.96089	3.56289	2.80367	2.70272	3.58479	4.7666	2.62529	2.32117	1.23175	1.21528
G1	ENSG00000124217	MOCS3	protein_coding	11.8217	11.9521	4.694	4.24526	8.77535	9.00795	5.44202	5.95323	3.98464	4.2409
G1	ENSG00000124635	HIST1H2BJ	protein_coding	153.593	142.979	20.0175	15.7756	72.3955	85.1968	74.0367	75.1898	47.0805	41.882
G1	ENSG00000124659	TBCC	protein_coding	32.3312	31.9805	25.7132	26.1402	23.6158	25.3813	22.0359	26.0244	20.1275	20.0645
G1	ENSG00000124713	GNMT	protein_coding	1.45164	1.39284	0.954163	0.94713	1.45776	0.994608	1.50907	1.61349	0.834643	0.698704
G1	ENSG00000124743	KLHL31	protein_coding	0.573313	0.477071	0.42563	0.318514	0.307682	0.41029	0.309708	0.277093	0.088043	0.101927
G1	ENSG00000124789	NUP153	protein_coding	38.058	40.2519	28.8517	30.3518	33.3993	35.013	42.0539	42.0629	25.2905	23.36
G1	ENSG00000124875	CXCL6	protein_coding	0.134745	0.220404	0	0	0.110549	0.100847	0.050671	0.063905	0	0
G1	ENSG00000124882	EREG	protein_coding	12.3574	10.9454	0.884889	1.01035	10.3216	14.3312	4.2424	4.13995	0.66395	0.962932
G1	ENSG00000125398	SOX9	protein_coding	148.931	145.996	59.7047	59.1586	71.2442	81.0603	103.991	96.6936	24.5901	28.0207
G1	ENSG00000125538	IL1B	protein_coding	1.47339	1.24005	0.016677	0.10335	0.6134	0.597951	0.092137	0.117645	0.085434	0
G1	ENSG00000125740	FOSB	protein_coding	16.0103	12.2397	0.985165	0.628102	1.05025	1.86964	1.06191	0.83014	1.83847	2.47076
G1	ENSG00000125772	GPCPD1	protein_coding	11.4531	9.01161	3.3065	3.22848	8.19527	8.96111	6.0604	5.20952	4.78915	5.86684
G1	ENSG00000125798	FOXA2	protein_coding	12.2321	13.8748	7.63348	6.73866	6.60965	7.41281	6.72183	5.81076	4.48853	5.14295
G1	ENSG00000125845	BMP2	protein_coding	13.957	13.0956	4.26614	4.3767	7.22261	8.09664	5.06605	4.90822	2.12387	2.31403
G1	ENSG00000125952	MAX	protein_coding	160.388	166.062	71.6917	84.8727	87.0258	89.725	99.8035	111.399	68.5706	64.0264
G1	ENSG00000125968	ID1	protein_coding	270.206	272.466	135.81	128.703	216.512	247.536	127.467	147.991	140.567	158.766
G1	ENSG00000126368	NR1D1	protein_coding	43.3718	49.2548	5.07073	4.97433	14.1973	14.2814	10.6776	10.3724	6.68995	7.16082
G1	ENSG00000126391	FRMD8	protein_coding	25.7864	29.2906	19.9709	18.8323	26.0964	28.8207	18.6276	18.4893	12.7052	12.9788
G1	ENSG00000126550	HTN1	protein_coding	3.70348	2.10514	0.151885	0	0.237515	0.295035	0.131269	0.018944	0.314151	0.226762
G1	ENSG00000126759	CFP	protein_coding	1.02403	1.02369	0.193149	0.26201	0.516252	0.462509	0.532603	0.56931	0.367265	0.632726
G1	ENSG00000127152	BCL11B	protein_coding	7.49922	7.5332	2.6566	2.28198	2.45613	2.17053	2.08311	1.55114	1.72907	1.42527
G1	ENSG00000127311	HELB	protein_coding	3.31621	3.2736	1.81106	2.11744	1.78663	1.54766	2.09293	1.9488	2.0695	1.59035
G1	ENSG00000127334	DYRK2	protein_coding	18.4386	19.9342	10.2654	10.4218	11.3786	12.7417	13.472	13.036	12.3344	11.8885
G1	ENSG00000128342	LIF	protein_coding	140.041	150.984	82.8476	75.1488	166.287	183.686	83.7834	91.7931	66.0737	66.3844
G1	ENSG00000128564	VGF	protein_coding	209.675	195.41	40.6829	41.6506	114.224	105.837	81.0831	89.352	39.636	49.3493
G1	ENSG00000128591	FLNC	protein_coding	424.422	433.636	176.212	219.785	438.801	437.335	258.36	285.212	244.972	269.881
G1	ENSG00000128594	LRRC4	protein_coding	0.844387	0.726731	0.233388	0.243565	0.4406	0.42268	0.069513	0.183665	0.163694	0.151561
G1	ENSG00000129315	CCNT1	protein_coding	26.4961	27.6347	20.1881	21.6207	23.5861	24.1727	25.4951	25.9501	12.2734	11.5464
G1	ENSG00000129654	FOXJ1	protein_coding	0.246456	0.153246	0.081242	0.041002	0.156494	0.147864	0.134537	0.131242	0.049569	0.048074
G1	ENSG00000130054	FAM155B	protein_coding	1.29991	1.49423	0.939348	0.940317	0.714452	0.751191	0.950409	0.937452	0.799213	0.77932
G1	ENSG00000130066	SAT1	protein_coding	21.369	19.0227	14.4464	14.6034	21.0579	22.5491	20.2254	21.3475	6.43646	6.57127
G1	ENSG00000130203	APOE	protein_coding	8.32725	8.11338	2.73799	1.70028	2.99846	2.67753	3.10985	3.1418	2.4689	2.38288
G1	ENSG00000130489	SCO2	protein_coding	32.2481	30.8361	23.7469	23.0907	25.9939	26.7105	21.1127	23.1594	17.593	16.9457
G1	ENSG00000130544	ZNF557	protein_coding	7.16878	6.94914	3.84235	4.20752	4.90822	5.36955	4.94496	5.20227	1.51118	1.92774
G1	ENSG00000130711	PRDM12	protein_coding	0.384048	0.372233	0.075802	0.149603	0.217092	0.17629	0.142769	0.129801	0.111785	0.123927
G1	ENSG00000130749	ZC3H4	protein_coding	23.5029	24.055	10.2983	12.0429	23.5615	15.5578	12.7221	14.5824	8.84061	8.87288
G1	ENSG00000131016	AKAP12	protein_coding	189.143	185.978	66.4889	74.9158	200.861	239.318	102.112	152.839	42.3362	40.838
G1	ENSG00000131080	EDA2R	protein_coding	41.7005	46.9158	31.3646	32.7674	17.4376	17.278	26.6941	27.8254	15.8854	15.1656
G1	ENSG00000131759	RARA	protein_coding	75.4378	87.1209	69.6959	60.9077	84.1893	80.9128	58.9474	58.5123	54.1534	68.3104
G1	ENSG00000132326	PER2	protein_coding	12.2805	12.0646	3.69564	3.83235	6.09183	6.62744	5.85214	6.40243	5.19982	6.02046
G1	ENSG00000132464	ENAM	protein_coding	0.82837	0.487426	0.461306	0.469439	0.560111	0.623106	0.56272	0.593989	0.106819	0.08838
G1	ENSG00000132467	UTP3	protein_coding	236.964	225.044	90.1761	91.8617	150.015	172.296	157.679	175.055	151.51	149.645
G1	ENSG00000132510	KDM6B	protein_coding	25.2487	24.3365	5.46006	6.16647	13.5956	17.0978	7.61757	13.4903	9.16796	10.6658
G1	ENSG00000132661	NXT1	protein_coding	58.0921	57.6161	36.0037	34.1511	37.7676	42.9902	36.6244	37.3362	19.0691	18.7011
G1	ENSG00000132669	RIN2	protein_coding	27.2361	27.6068	13.7053	13.7076	18.223	21.4818	10.9054	14.3018	11.5136	10.2783
G1	ENSG00000132872	SYT4	protein_coding	0.710914	0.714222	0.091156	0.080459	0.152382	0.232022	0.046241	0.066101	0.060482	0.140647
G1	ENSG00000133059	DSTYK	protein_coding	15.3885	15.0726	11.4361	12.0132	13.1497	14.5512	13.3823	13.7627	8.33854	9.97936
G1	ENSG00000133124	IRS4	protein_coding	0.501693	0.418142	0.138035	0.237848	0.219914	0.203284	0.239058	0.264698	0.097873	0.126101
G1	ENSG00000133639	BTG1	protein_coding	55.4506	51.631	9.10723	8.62648	17.4097	20.7433	10.8045	12.0203	7.73386	8.90602
G1	ENSG00000134107	BHLHE40	protein_coding	115.309	117.736	84.6086	88.8867	116.136	129.97	83.9402	80.0911	37.8953	42.698
G1	ENSG00000134531	EMP1	protein_coding	174.393	160.693	84.748	81.1734	177.716	185.216	127.357	134.105	88.9446	94.6781
G1	ENSG00000134954	ETS1	protein_coding	152.067	157.479	48.4199	53.6795	94.6118	119.484	74.1332	83.3261	83.5441	114.34
G1	ENSG00000134987	WDR36	protein_coding	39.9522	48.9554	21.4583	21.743	32.5791	37.4798	34.904	32.681	30.8483	28.2938
G1	ENSG00000135111	TBX3	protein_coding	69.8022	67.8717	13.3464	13.6491	31.3415	35.6527	51.4493	53.7896	13.2315	12.6021
G1	ENSG00000135241	PNPLA8	protein_coding	21.1372	18.4034	12.0313	13.3256	12.9109	13.6002	14.9268	13.5531	8.77348	8.79978
G1	ENSG00000135373	EHF	protein_coding	0.621984	0.560342	0.251588	0.307825	0.578627	0.914536	0.440461	0.51614	0.050826	0.072405
G1	ENSG00000135625	EGR4	protein_coding	2.12425	2.22339	0.192664	0.318244	0.890018	1.34469	0.118422	0.279747	0.117094	0.082396
G1	ENSG00000135899	SP110	protein_coding	30.2311	30.852	27.3811	23.8009	20.6473	22.571	34.3761	33.4676	14.1022	14.6628
G1	ENSG00000135913	USP37	protein_coding	13.6442	12.8633	13.4615	12.9214	11.4337	13.1563	10.323	7.89095	4.18147	4.83142
G1	ENSG00000135974	C2orf49	protein_coding	28.8168	26.9314	21.7504	21.6845	19.7495	21.125	19.979	19.5063	18.225	17.7223
G1	ENSG00000136158	SPRY2	protein_coding	117.515	113.178	9.11686	8.73863	13.9439	17.9552	12.126	14.2578	6.78666	7.77938
G1	ENSG00000136634	IL10	protein_coding	0.133522	0.127149	0	0	0.170376	0.08939	0.097981	0.07451	0	0
G1	ENSG00000136866	ZFP37	protein_coding	1.73963	1.73374	1.24212	1.47551	0.617499	1.06412	0.682503	1.43793	0.526296	0.553271
G1	ENSG00000136869	TLR4	protein_coding	35.3342	32.6819	24.3888	25.8248	31.1818	32.2235	34.5554	33.9	10.8593	10.8117
G1	ENSG00000136881	BAAT	protein_coding	1.07227	0.875804	0.284815	0.216322	0.520168	0.40184	0.486059	0.453884	0.445817	0.429545
G1	ENSG00000136997	MYC	protein_coding	48.6886	60.7356	21.6271	12.7155	18.7838	28.3034	26.1351	7.02455	29.6302	25.5283
G1	ENSG00000137040	RANBP6	protein_coding	22.4988	22.6392	14.5335	15.244	14.3718	14.0437	16.7492	16.8045	13.0195	12.5514
G1	ENSG00000137331	IER3	protein_coding	597.628	617.119	251.91	225.829	321.651	424.597	138.664	160.887	93.9551	101.498
G1	ENSG00000137449	CPEB2	protein_coding	5.92019	6.27762	1.81331	1.87075	1.51174	1.1562	1.12543	1.25774	1.38966	1.36419
G1	ENSG00000137494	ANKRD42	protein_coding	15.5906	13.3799	9.60299	9.92042	10.4422	11.3768	13.3323	12.076	6.04595	5.98759
G1	ENSG00000137558	PI15	protein_coding	0.66505	0.542469	0.403187	0.538698	0.361282	0.388106	0.196212	0.424851	0.276849	0.206558
G1	ENSG00000137745	MMP13	protein_coding	6.43835	6.91807	1.09985	0.857236	2.59669	2.04931	2.83411	2.14378	0.858302	0.854878
G1	ENSG00000138166	DUSP5	protein_coding	106.027	100.741	9.30767	8.98403	24.3976	34.2494	10.9794	11.6147	9.81596	11.0092
G1	ENSG00000138271	GPR87	protein_coding	45.7965	48.8305	33.2881	32.2175	32.9783	36.3067	39.3736	42.1435	11.8799	10.0857
G1	ENSG00000138386	NAB1	protein_coding	76.1277	76.4493	46.8823	51.3509	48.9459	63.1534	26.1722	26.668	41.5853	45.6885
G1	ENSG00000139146	SINHCAF	protein_coding	84.9152	78.4953	36.7347	26.5126	38.5424	62.7479	38.2558	24.6221	46.1877	22.5982
G1	ENSG00000139289	PHLDA1	protein_coding	47.9235	46.4089	6.82223	6.69296	22.7851	27.6197	16.3694	15.7305	5.56834	6.02848
G1	ENSG00000139438	FAM222A	protein_coding	7.19678	8.2625	3.27423	3.91582	2.95134	2.94247	2.62172	2.99488	1.87	1.69007
G1	ENSG00000139549	DHH	protein_coding	0.192007	0.194694	0.057286	0.056706	0.164646	0.141822	0.129489	0.09952	0.110222	0.057236
G1	ENSG00000139668	WDFY2	protein_coding	7.2495	7.09873	6.39556	6.09591	5.80704	5.70315	9.65363	10.414	3.7626	3.98884
G1	ENSG00000139832	RAB20	protein_coding	8.10435	7.5604	4.37262	4.22062	5.29961	5.13642	4.55037	4.51689	2.05442	2.61762
G1	ENSG00000139874	SSTR1	protein_coding	0.222054	0.273523	0.053535	0.052277	0.083031	0.039239	0.116828	0.053025	0.042594	0.037886
G1	ENSG00000139890	REM2	protein_coding	0.817942	0.754853	0.734125	0.578881	0.739213	0.703444	0.534299	0.684808	0.177985	0.25534
G1	ENSG00000139946	PELI2	protein_coding	8.4096	7.67826	6.46779	6.36097	5.01875	5.37712	2.67133	2.76378	2.54779	2.37346
G1	ENSG00000140030	GPR65	protein_coding	2.41323	2.1539	0.355315	0.324499	1.7081	2.18496	1.33773	1.81027	0.147324	0.159862
G1	ENSG00000140332	TLE3	protein_coding	68.5931	72.8884	21.2439	21.5221	32.1633	36.3179	31.0632	31.5733	29.279	32.5211
G1	ENSG00000140450	ARRDC4	protein_coding	7.839	7.2831	1.89441	1.8398	2.37522	2.49531	2.36161	2.12474	1.68631	1.70296
G1	ENSG00000140543	DET1	protein_coding	3.00898	3.73411	1.94724	2.38427	3.34417	2.22795	2.29162	2.45791	6.52577	4.08413
G1	ENSG00000140691	ARMC5	protein_coding	4.63578	5.02864	3.52235	3.28164	3.78325	3.52348	3.79925	3.54907	2.55876	2.81248
G1	ENSG00000140905	GCSH	protein_coding	51.8885	58.581	49.8557	62.0074	42.8455	56.6966	44.236	60.3591	64.1803	66.3707
G1	ENSG00000140941	MAP1LC3B	protein_coding	81.9765	75.585	56.038	65.2074	71.6416	74.5	61.0982	77.5145	47.7414	46.8926
G1	ENSG00000141337	ARSG	protein_coding	2.65525	2.99876	1.83196	1.80685	2.34799	2.49695	1.76116	2.54601	1.38695	1.27901
G1	ENSG00000141384	TAF4B	protein_coding	8.92226	8.26788	2.18114	2.11186	3.82572	3.49457	2.26555	2.43312	3.68046	3.66333
G1	ENSG00000141682	PMAIP1	protein_coding	55.0904	56.447	39.0168	36.3222	40.5508	49.489	31.6462	32.2731	26.7168	26.5359
G1	ENSG00000142396	ERVK3-1	protein_coding	66.9457	62.2947	55.629	45.7617	49.5171	63.7671	57.6481	54.8751	57.5985	47.2469
G1	ENSG00000142867	BCL10	protein_coding	29.3574	30.842	22.0198	22.564	31.0512	34.1771	21.8351	22.229	15.5707	15.074
G1	ENSG00000143067	ZNF697	protein_coding	77.6174	76.5863	26.4184	27.6786	38.8456	44.6999	36.5034	40.8894	25.047	25.7324
G1	ENSG00000143190	POU2F1	protein_coding	3.03135	3.3163	5.50784	2.06301	2.95073	2.43901	4.60612	2.56567	2.4529	4.28236
G1	ENSG00000143199	ADCY10	protein_coding	0.03109	0.136238	0.03794	0.10688	0.04011	0.009855	0.01824	0.002396	0.033032	0.053578
G1	ENSG00000143322	ABL2	protein_coding	80.8802	82.9697	36.7961	41.8517	48.1232	54.2312	64.5645	70.4073	32.5945	35.8932
G1	ENSG00000143333	RGS16	protein_coding	22.8816	22.5965	5.96234	5.17548	12.6668	14.7796	8.89881	9.6229	1.83312	2.23952
G1	ENSG00000143479	DYRK3	protein_coding	53.1801	28.5285	33.3751	21.2135	20.1945	21.2452	49.2184	49.8281	24.3278	23.8522
G1	ENSG00000143507	DUSP10	protein_coding	37.1628	36.98	6.81057	5.64927	6.80601	6.01476	3.75179	3.89762	3.46291	3.35224
G1	ENSG00000143614	GATAD2B	protein_coding	17.3763	17.8225	12.0439	12.5511	14.5183	14.6137	17.1111	16.9337	6.37841	5.74151
G1	ENSG00000143842	SOX13	protein_coding	21.5872	23.6175	13.6905	12.6816	18.3181	18.9955	12.0324	11.0974	4.86252	5.91116
G1	ENSG00000143867	OSR1	protein_coding	1.91777	2.05247	1.21411	1.02304	1.51136	1.57659	0.934104	0.926452	0.256645	0.31923
G1	ENSG00000144136	SLC20A1	protein_coding	710.784	681.227	168.64	178.292	542.739	568.731	283.194	297.202	163.605	163.935
G1	ENSG00000144550	CPNE9	protein_coding	0.205193	0.290699	0	0	0.081445	0.027878	0.070298	0	0.015213	0.139464
G1	ENSG00000144560	VGLL4	protein_coding	62.1023	61.1646	28.4818	29.4111	28.1436	33.4452	24.687	25.7535	23.3712	25.4278
G1	ENSG00000144655	CSRNP1	protein_coding	61.3457	62.9516	42.4089	43.9641	60.3294	67.8096	38.9394	47.1505	36.4131	38.9418
G1	ENSG00000145107	TM4SF19	protein_coding	20.6695	20.2222	12.5931	13.2347	16.032	15.066	12.2067	13.8324	5.95725	7.4397
G1	ENSG00000145390	USP53	protein_coding	44.162	41.7304	16.663	17.1487	14.6667	16.2249	18.5331	24.4684	12.3612	11.5042
G1	ENSG00000145632	PLK2	protein_coding	213.369	223.911	106.526	88.5666	96.5778	97.9709	86.8386	92.2337	65.7231	58.1604
G1	ENSG00000145817	YIPF5	protein_coding	90.8614	85.1142	63.4053	63.8334	86.6467	92.1608	81.6718	83.3061	51.6449	55.5331
G1	ENSG00000145911	N4BP3	protein_coding	3.88243	3.52326	2.2688	2.44532	2.38232	2.84788	0.673703	0.74233	1.28387	1.54027
G1	ENSG00000146242	TPBG	protein_coding	46.1126	42.2306	34.8578	31.5298	40.7875	46.3981	34.3177	38.2204	19.3356	20.269
G1	ENSG00000147050	KDM6A	protein_coding	19.7615	20.2302	13.8359	11.4854	10.0747	10.4396	13.8868	14.9376	8.86006	8.94749
G1	ENSG00000147117	ZNF157	protein_coding	1.9456	1.8517	1.18556	0.896214	1.75282	2.15557	1.22055	1.15707	0.331672	0.321342
G1	ENSG00000147509	RGS20	protein_coding	7.12943	6.30168	3.31299	3.18991	1.75156	1.95486	0.794987	0.940879	2.73268	3.20904
G1	ENSG00000147883	CDKN2B	protein_coding	9.18768	7.27409	2.51146	2.49083	4.19008	5.50802	3.69999	3.67705	1.26234	1.42786
G1	ENSG00000148737	TCF7L2	protein_coding	21.0611	16.5264	9.44892	9.67794	10.6639	10.8534	12.3729	16.6181	11.0085	9.1993
G1	ENSG00000148841	ITPRIP	protein_coding	20.0328	65.2331	22.0214	22.8317	60.9077	57.09	34.448	38.8322	20.5613	23.1551
G1	ENSG00000148842	CNNM2	protein_coding	18.5788	21.1547	4.16154	8.3883	3.07709	3.2243	7.56292	7.79409	7.36207	8.4595
G1	ENSG00000148926	ADM	protein_coding	3.66342	3.0103	1.37597	1.43507	1.7563	3.47979	1.84102	2.24192	1.7604	1.36838
G1	ENSG00000149054	ZNF215	protein_coding	8.79893	8.65323	7.79733	10.3706	8.87249	12.724	5.51659	8.80617	5.07255	5.43553
G1	ENSG00000149798	CDC42EP2	protein_coding	37.5582	39.7396	13.1982	13.8986	28.0219	27.9373	26.8295	8.12201	16.7305	17.2609
G1	ENSG00000149948	HMGA2	protein_coding	91.916	92.4458	21.5816	21.0318	49.3615	54.1613	76.3889	75.7048	27.2685	24.18
G1	ENSG00000149968	MMP3	protein_coding	36.5815	40.2513	3.65943	4.08047	9.65756	12.9711	10.0426	12.4979	10.6495	11.704
G1	ENSG00000150347	ARID5B	protein_coding	39.3742	40.6147	25.2564	27.9021	23.8382	27.2394	19.6936	17.6596	9.24858	9.20957
G1	ENSG00000150630	VEGFC	protein_coding	35.5242	38.0135	10.3044	9.7118	19.166	20.4999	13.3576	13.4797	15.6132	15.6408
G1	ENSG00000150783	TEX12	protein_coding	1.43191	0.884609	0.231411	0.251738	1.04115	1.63086	0.468079	0.49142	0.23864	0.196201
G1	ENSG00000150907	FOXO1	protein_coding	15.2798	16.2684	4.79007	5.0574	11.7551	13.7546	2.72932	2.90272	1.89894	1.82361
G1	ENSG00000150991	UBC	protein_coding	371.657	363.812	227.151	171.696	250.325	198.337	172.019	166.788	80.4458	81.4159
G1	ENSG00000151014	NOCT	protein_coding	42.9436	43.2358	14.9935	14.0635	18.0218	19.6239	16.6836	17.6468	6.96103	7.28489
G1	ENSG00000151131	C12orf45	protein_coding	3.88076	4.12167	2.40635	2.26762	2.63274	2.55362	7.03664	3.18437	3.14446	2.59742
G1	ENSG00000151612	ZNF827	protein_coding	17.9397	17.1129	10.7873	11.9629	11.2645	11.6719	13.183	12.875	11.1974	10.5093
G1	ENSG00000151883	PARP8	protein_coding	30.5635	34.6223	17.8153	21.4104	22.9608	27.3956	13.1473	12.935	12.0887	11.4922
G1	ENSG00000151952	TMEM132D	protein_coding	0.059528	0.049842	0.051548	0.010703	0.05604	0.050472	0.034734	0.049739	0.017408	0.026266
G1	ENSG00000152409	JMY	protein_coding	5.852	4.61648	2.57934	2.85539	2.06587	1.83231	1.5313	1.46755	2.0969	2.22341
G1	ENSG00000152454	ZNF256	protein_coding	16.9128	14.9899	7.98093	7.57068	6.2355	8.00304	10.4004	10.2807	5.72476	5.61468
G1	ENSG00000152661	GJA1	protein_coding	76.878	76.6889	49.393	48.6677	43.8892	43.7112	48.2091	45.2454	46.894	44.4199
G1	ENSG00000152684	PELO	protein_coding	23.8395	23.6208	14.6429	14.96	15.8758	17.1304	14.5104	15.8321	13.9202	13.7819
G1	ENSG00000152939	MARVELD2	protein_coding	0.429977	0.314413	0.344335	0.284669	0.224206	0.280504	0.256849	0.266725	0.199962	0.205651
G1	ENSG00000153234	NR4A2	protein_coding	21.5688	28.2777	1.7599	2.51203	3.02049	5.43885	1.27971	0.943609	3.59416	4.25068
G1	ENSG00000153443	UBALD1	protein_coding	24.6817	35.544	23.6104	15.7439	20.3061	19.933	24.2467	17.3749	8.74678	14.1496
G1	ENSG00000153721	CNKSR3	protein_coding	2.75598	2.49752	1.68595	1.64195	1.16822	1.33844	0.799293	0.741359	1.53947	1.42477
G1	ENSG00000153922	CHD1	protein_coding	75.4419	66.9997	45.268	46.1114	44.941	50.987	52.7469	58.6818	35.9107	40.3275
G1	ENSG00000154479	CCDC173	protein_coding	0.579657	0.500885	0.085667	0.05338	0.109991	0.173342	0.077484	0.172032	0.205241	0.384645
G1	ENSG00000155265	GOLGA7B	protein_coding	0.259254	0.24071	0.06941	0.069836	0.128329	0.131426	0.096953	0.063238	0.077304	0.06682
G1	ENSG00000155846	PPARGC1B	protein_coding	3.72256	3.88213	1.81796	1.77372	1.79298	1.76105	2.02994	2.26055	1.51474	1.46997
G1	ENSG00000156273	BACH1	protein_coding	47.9159	46.6542	30.6049	34.4167	44.0029	48.9451	28.6441	28.9346	28.8364	27.9099
G1	ENSG00000156804	FBXO32	protein_coding	15.7906	16.6795	4.79236	5.26661	11.6305	12.7338	7.26374	7.57003	2.60993	2.89164
G1	ENSG00000157502	MUM1L1	protein_coding	4.34733	4.31437	2.4253	2.7771	4.12272	4.36356	1.73988	1.65315	1.21246	1.35242
G1	ENSG00000157540	DYRK1A	protein_coding	9.96631	11.6674	5.07916	4.81051	6.55903	7.04527	8.30961	11.4502	6.02158	4.50169
G1	ENSG00000157933	SKI	protein_coding	30.2092	30.0542	18.4886	20.1775	22.5546	23.1619	19.9534	22.4549	19.558	18.516
G1	ENSG00000158050	DUSP2	protein_coding	25.2851	27.5143	13.4422	16.0886	25.3264	37.0553	6.01339	7.77307	8.98426	9.25227
G1	ENSG00000158161	EYA3	protein_coding	19.4869	15.3378	12.0295	10.3863	11.8697	15.2177	21.5235	16.9569	11.8601	10.4213
G1	ENSG00000158373	HIST1H2BD	protein_coding	174.932	159.038	19.2226	19.5697	40.3856	48.5956	43.1249	40.1629	55.7014	53.428
G1	ENSG00000158406	HIST1H4H	protein_coding	75.4171	80.9164	11.791	9.01153	27.4495	33.1447	30.6216	25.8406	18.3475	20.4164
G1	ENSG00000158615	PPP1R15B	protein_coding	62.5487	59.4384	46.1585	45.4067	43.9829	44.6266	48.2676	50.4108	37.4134	39.1457
G1	ENSG00000160199	PKNOX1	protein_coding	17.9971	18.1118	7.62078	7.62963	15.5131	14.7455	16.8342	16.3341	9.40895	9.19941
G1	ENSG00000160679	CHTOP	protein_coding	113.486	115.21	75.526	72.8985	79.8356	81.9521	65.635	68.9932	71.2717	79.22
G1	ENSG00000160712	IL6R	protein_coding	5.59712	7.44252	3.47982	3.45419	4.84959	6.26405	3.71581	3.00298	3.17552	3.26362
G1	ENSG00000160888	IER2	protein_coding	11.9669	31.5034	6.50704	5.97709	17.9001	5.9015	32.0499	3.8309	24.5905	28.5156
G1	ENSG00000160908	ZNF394	protein_coding	17.5316	16.5067	10.4768	8.78046	11.6584	11.2607	14.9461	14.1059	6.23403	8.58979
G1	ENSG00000161960	EIF4A1	protein_coding	194.978	189.489	107.25	101.141	57.1313	125.341	74.9575	85.5637	162.784	158.122
G1	ENSG00000162367	TAL1	protein_coding	1.89285	1.88122	1.36497	1.46645	1.92538	2.20446	0.788764	0.914054	1.04176	1.12103
G1	ENSG00000162407	PLPP3	protein_coding	25.299	26.3735	19.5719	19.2735	22.7748	25.3564	13.2694	14.4944	8.06732	8.21864
G1	ENSG00000162413	KLHL21	protein_coding	23.0578	23.9544	9.166	9.54781	17.0109	17.2563	4.43591	13.2109	9.45743	10.9576
G1	ENSG00000162650	ATXN7L2	protein_coding	14.4803	17.0993	12.3868	9.56519	16.4086	16.0638	14.9897	15.3757	10.4562	10.2662
G1	ENSG00000162695	SLC30A7	protein_coding	14.9786	13.9938	10.5625	10.454	16.3852	16.2099	15.2719	15.3691	6.75661	7.01377
G1	ENSG00000162711	NLRP3	protein_coding	10.998	12.3112	4.41823	4.32194	8.50305	10.7281	10.4913	12.4255	4.50966	4.67629
G1	ENSG00000162775	RBM15	protein_coding	58.548	59.7801	27.495	29.6687	23.9803	24.7779	40.9775	42.3606	24.8994	25.8238
G1	ENSG00000162783	IER5	protein_coding	74.1788	74.4703	55.0715	53.9817	62.4116	70.7814	53.984	59.6414	17.4916	19.22
G1	ENSG00000162924	REL	protein_coding	5.28644	5.35205	4.32693	6.88355	3.78569	4.39802	4.34537	2.95717	2.91229	4.36404
G1	ENSG00000162951	LRRTM1	protein_coding	0.278567	0.297532	0.072682	0.103988	0.084657	0.124513	0	0.020496	0.035807	0.025046
G1	ENSG00000163092	XIRP2	protein_coding	0.711684	0.374124	0.120898	0.115085	0.349808	0.275944	0.145194	0.16074	0.131421	0.157466
G1	ENSG00000163216	SPRR2D	protein_coding	0.667199	0.663453	0	0.135035	0.193735	0.342001	0.039543	0.094894	0.102512	0.074242
G1	ENSG00000163376	KBTBD8	protein_coding	3.85981	6.3502	2.63936	2.57561	2.67296	2.90532	2.23056	2.90994	2.00752	1.94997
G1	ENSG00000163399	ATP1A1	protein_coding	512.565	506.281	350.315	355.461	419.295	392.875	379.131	373.854	323.64	327.515
G1	ENSG00000163492	CCDC141	protein_coding	0.021209	0.033156	0.015662	0.010551	0.009438	0.039757	0.005837	0.007588	0.002544	0.001389
G1	ENSG00000163513	TGFBR2	protein_coding	114.753	116.558	52.5169	55.5145	85.9659	89.729	95.5941	96.809	60.9646	63.6046
G1	ENSG00000163536	SERPINI1	protein_coding	2.523	2.69059	1.65147	1.35531	1.80163	2.11936	1.81723	2.20467	1.16707	0.953828
G1	ENSG00000163545	NUAK2	protein_coding	4.02596	4.43973	3.64234	3.23808	3.26343	3.82664	1.13405	1.25999	0.850954	1.06766
G1	ENSG00000163577	EIF5A2	protein_coding	13.9904	13.8349	7.62577	7.80146	9.50892	12.8026	11.346	11.6723	9.36044	9.1138
G1	ENSG00000163638	ADAMTS9	protein_coding	2.8506	3.19963	1.31028	1.45369	3.15525	3.1992	1.33579	1.50588	0.481998	0.653684
G1	ENSG00000163661	PTX3	protein_coding	129.903	127.028	5.92274	6.29335	20.8332	30.7019	7.19318	9.7743	12.7441	12.3838
G1	ENSG00000163734	CXCL3	protein_coding	7.66509	8.79704	0.893252	0.898414	4.16664	6.99139	2.75484	3.2469	0.536564	0.583786
G1	ENSG00000163735	CXCL5	protein_coding	0.280606	0.262833	0	0.021297	0.051569	0.047534	0.090767	0.139098	0.044289	0
G1	ENSG00000163806	SPDYA	protein_coding	0.865224	0.693382	1.21448	1.71897	1.0985	0.726487	1.23661	1.57496	0.694142	0.668859
G1	ENSG00000163823	CCR1	protein_coding	0.470067	0.340769	0.058619	0.028894	0.19978	0.215624	0.219377	0.257059	0.116338	0.102357
G1	ENSG00000163874	ZC3H12A	protein_coding	26.6591	27.4461	12.6092	12.5981	27.6994	30.2273	13.5926	14.2	10.699	11.4923
G1	ENSG00000163877	SNIP1	protein_coding	18.3815	17.255	13.0175	13.5626	15.4455	17.9031	16.8943	17.6597	10.8674	9.93915
G1	ENSG00000163960	UBXN7	protein_coding	16.1239	14.6499	11.9991	12.9041	12.2366	12.6506	14.333	13.8592	9.35633	8.85133
G1	ENSG00000163961	RNF168	protein_coding	28.2673	25.9924	20.606	21.2169	18.8952	18.0243	18.7713	19.5189	13.6646	13.584
G1	ENSG00000164076	CAMKV	protein_coding	1.15219	0.819317	0.397231	0.245597	0.346747	0.36068	0.393588	0.540648	0.587572	0.393251
G1	ENSG00000164080	RAD54L2	protein_coding	14.0831	13.9003	9.73469	10.9387	15.2756	7.92392	13.5593	14.1604	8.35274	9.2859
G1	ENSG00000164086	DUSP7	protein_coding	72.0197	76.0917	39.723	39.8133	60.915	63.7261	52.4426	52.7171	35.1401	36.644
G1	ENSG00000164116	GUCY1A1	protein_coding	0.043999	0.085193	0.045337	0.012305	0.024564	0.028172	0	0.006254	0	0.005763
G1	ENSG00000164128	NPY1R	protein_coding	1.53217	1.1205	1.00185	1.11188	0.628419	0.441786	0.669483	0.488767	0.509149	0.601766
G1	ENSG00000164318	EGFLAM	protein_coding	44.8094	32.6513	22.3751	18.3229	16.1796	20.6953	21.4483	22.7534	18.8656	13.8547
G1	ENSG00000164442	CITED2	protein_coding	84.0395	95.7038	30.2889	28.3358	31.938	36.3841	13.9868	13.9469	11.478	12.1777
G1	ENSG00000164463	CREBRF	protein_coding	4.9556	4.79389	3.98082	4.43122	2.98649	2.74583	2.71863	2.63596	2.30586	2.51918
G1	ENSG00000164626	KCNK5	protein_coding	26.7873	25.2636	14.9242	15.8837	21.1688	21.5162	16.4319	19.0082	15.373	17.4711
G1	ENSG00000164631	ZNF12	protein_coding	41.2518	35.5494	21.5836	21.4278	21.9525	22.5184	23.9398	23.6374	23.5651	26.4494
G1	ENSG00000164647	STEAP1	protein_coding	29.1443	29.0752	18.4726	19.6759	22.0194	25.1998	26.2178	30.2062	19.0167	17.4077
G1	ENSG00000164683	HEY1	protein_coding	4.88075	3.33293	4.16682	4.05872	3.46775	3.83659	2.83327	2.89018	2.09252	2.27286
G1	ENSG00000164776	PHKG1	protein_coding	1.92081	2.32013	0.804027	0.896632	1.02553	1.22035	1.69852	2.0322	0.836305	1.19969
G1	ENSG00000164794	KCNV1	protein_coding	2.33367	1.99899	0.953498	0.642469	1.67167	2.17164	0.428767	0.193113	0.100066	0.11816
G1	ENSG00000164849	GPR146	protein_coding	5.80451	4.87617	3.15479	2.68704	3.09268	3.00896	1.61337	1.60001	1.31354	2.00744
G1	ENSG00000164949	GEM	protein_coding	72.5211	70.442	10.0177	11.1322	21.1688	40.1868	17.4588	20.9426	18.1568	18.4108
G1	ENSG00000164951	PDP1	protein_coding	67.7799	69.746	29.2812	31.1727	41.7145	48.281	23.9687	25.4641	25.6116	22.9625
G1	ENSG00000165029	ABCA1	protein_coding	0.849262	0.939072	0.429313	0.431814	0.696192	0.560679	0.564301	0.671682	0.217992	0.213107
G1	ENSG00000165312	OTUD1	protein_coding	7.18309	7.38212	5.49782	6.26097	5.3795	5.54316	3.91935	3.42742	2.83322	2.93323
G1	ENSG00000165355	FBXO33	protein_coding	16.7782	15.974	12.8317	13.7538	15.322	16.6186	12.8879	12.0801	9.28898	9.37132
G1	ENSG00000165507	DEPP1	protein_coding	18.2479	20.1221	11.373	10.8872	7.93267	8.06131	5.16373	4.27428	2.05854	2.36671
G1	ENSG00000165527	ARF6	protein_coding	93.5854	89.9678	71.8247	67.3601	86.3852	98.4336	74.6305	77.8629	54.5477	55.3617
G1	ENSG00000165572	KBTBD6	protein_coding	11.9327	10.949	6.14511	6.30407	7.07366	7.02797	6.04827	6.31105	5.3949	5.78444
G1	ENSG00000165606	DRGX	protein_coding	0.271357	0.441942	0.11927	0.077514	0.214625	0.257622	0.127151	0.098387	0.038103	0.013893
G1	ENSG00000165702	GFI1B	protein_coding	0.160382	0.31604	0.042421	0.0654	0.241111	0.257299	0.119953	0.164688	0.007637	0.020426
G1	ENSG00000165794	SLC39A2	protein_coding	0.351114	0.120187	0.155722	0	0.178687	0.091756	0.13967	0.129487	0.095592	0.096698
G1	ENSG00000165813	CCDC186	protein_coding	17.6759	15.2414	10.2449	9.2523	12.6878	13.6008	15.8882	14.5748	9.52856	6.37363
G1	ENSG00000166133	RPUSD2	protein_coding	21.6567	22.0112	13.4601	12.2504	16.5216	16.5309	15.2656	16.1494	11.9658	11.574
G1	ENSG00000166170	BAG5	protein_coding	29.6315	26.7621	20.9558	21.3478	15.9817	22.3914	20.3901	21.4918	16.5811	17.44
G1	ENSG00000166394	CYB5R2	protein_coding	0.732687	0.816049	0.171246	0.259081	0.588305	0.721206	0.561246	0.566558	0.074476	0.235849
G1	ENSG00000166450	PRTG	protein_coding	5.12268	4.55446	1.01078	1.12804	2.88198	3.59013	2.30464	1.952	1.19945	0.967291
G1	ENSG00000166529	ZSCAN21	protein_coding	15.3209	19.0789	11.2394	10.2306	8.30107	12.8079	10.7133	11.9614	10.6915	11.5666
G1	ENSG00000166670	MMP10	protein_coding	5.3463	5.76804	0.925818	0.667561	1.69717	1.787	2.36596	2.16268	0.598122	0.932448
G1	ENSG00000166819	PLIN1	protein_coding	0.194619	0.18234	0.009101	0.032075	0.070875	0.016134	0.133069	0.075849	0.047671	0.103937
G1	ENSG00000166839	ANKDD1A	protein_coding	4.12308	3.8237	2.89627	2.81021	2.28811	2.26651	3.16009	2.76276	2.30159	2.36487
G1	ENSG00000166886	NAB2	protein_coding	57.887	55.9466	31.1282	29.9958	32.7226	33.3306	24.2548	26.9178	32.1257	33.5758
G1	ENSG00000167011	NAT16	protein_coding	6.05736	5.6226	2.13785	2.00518	3.48558	3.88818	2.56302	2.64266	1.17486	1.21678
G1	ENSG00000167034	NKX3-1	protein_coding	23.1322	21.4523	17.5501	18.8233	24.1112	25.2866	13.7621	14.8679	14.4807	14.2304
G1	ENSG00000167074	TEF	protein_coding	16.8613	16.3628	8.14125	9.00416	6.8502	6.62158	6.41807	6.68208	9.49701	10.2123
G1	ENSG00000167173	C15orf39	protein_coding	22.1542	24.2024	14.7039	14.4631	23.1853	18.4917	15.3093	14.8017	11.9308	13.6298
G1	ENSG00000167377	ZNF23	protein_coding	8.6736	9.54913	6.1212	7.19368	7.31335	8.66716	4.58151	8.89071	6.28289	9.22877
G1	ENSG00000167384	ZNF180	protein_coding	4.21921	3.92971	4.40548	3.77809	2.69631	2.87307	2.8843	3.9117	2.21788	2.5701
G1	ENSG00000167470	MIDN	protein_coding	47.2901	51.2607	33.7457	30.9476	48.8248	48.184	39.0759	40.0892	13.7214	14.8978
G1	ENSG00000167981	ZNF597	protein_coding	2.74316	2.32769	1.78254	1.7675	1.95302	1.91366	2.54471	2.4352	1.19743	1.11242
G1	ENSG00000168143	FAM83B	protein_coding	0.547821	0.732002	0.275707	0.231639	0.693086	0.715675	0.125524	0.257101	0.131939	0.124619
G1	ENSG00000168264	IRF2BP2	protein_coding	66.1562	61.8673	37.8029	33.8932	29.7183	26.7082	28.0274	25.4619	16.6267	17.7777
G1	ENSG00000168298	HIST1H1E	protein_coding	8.86771	9.4045	0.446814	0.323197	3.09755	2.28881	2.1317	1.86469	1.16492	0.989575
G1	ENSG00000168404	MLKL	protein_coding	15.4582	13.5914	6.39156	6.49644	7.74134	8.70748	11.1867	14.1087	5.97292	6.58965
G1	ENSG00000168679	SLC16A4	protein_coding	0.472457	0.644975	0.094538	0.138573	0.059195	0.124814	0.253656	0.159982	0.199514	0.192903
G1	ENSG00000168772	CXXC4	protein_coding	2.97661	2.80748	1.90106	2.17422	1.12497	1.19878	0.655116	0.617726	0.806441	0.729379
G1	ENSG00000168806	LCMT2	protein_coding	4.23224	4.20988	3.39459	3.3177	3.47362	3.76458	1.90296	2.36706	2.13608	2.33693
G1	ENSG00000168811	IL12A	protein_coding	3.66122	3.23972	3.78273	2.40068	2.20281	2.86539	2.15104	2.54164	1.33429	1.46544
G1	ENSG00000169242	EFNA1	protein_coding	9.49866	8.32456	6.78764	6.58801	7.93397	6.769	6.63145	7.85524	2.58665	2.8644
G1	ENSG00000169252	ADRB2	protein_coding	9.61591	9.90888	6.31189	5.72946	8.45397	9.82756	5.64109	6.83882	3.43884	3.63628
G1	ENSG00000169297	NR0B1	protein_coding	7.19722	6.89826	1.96761	2.24046	3.80704	4.30722	1.13776	0.9681	1.11544	1.20886
G1	ENSG00000169306	IL1RAPL1	protein_coding	3.96289	3.89197	1.34075	1.67563	3.00497	3.20054	3.81699	3.81584	0.793584	0.396546
G1	ENSG00000169429	CXCL8	protein_coding	261.687	315.106	3.38814	3.74543	158.878	284.672	10.6038	14.0109	1.94924	2.36245
G1	ENSG00000169548	ZNF280A	protein_coding	5.78632	5.6555	2.38653	2.28406	3.77907	4.0316	4.32616	4.41458	2.03104	1.98695
G1	ENSG00000169550	MUC15	protein_coding	6.04635	6.04231	2.33345	1.15052	3.64532	2.67344	6.16309	4.96036	3.97523	2.95636
G1	ENSG00000169908	TM4SF1	protein_coding	220.847	227.646	50.929	51.2378	236.604	300.389	136.973	148.422	57.5887	61.8698
G1	ENSG00000169981	ZNF35	protein_coding	9.99783	7.55596	3.4455	3.88695	4.87808	5.27993	6.46338	5.36425	4.52302	5.63962
G1	ENSG00000170100	ZNF778	protein_coding	21.3248	22.2387	9.86882	9.74475	11.5837	14.813	15.3104	17.3812	8.2344	8.38489
G1	ENSG00000170191	NANP	protein_coding	22.3227	21.4043	16.145	16.1972	9.41087	10.1259	9.13797	9.20921	13.4554	13.1161
G1	ENSG00000170345	FOS	protein_coding	7.23574	7.44675	7.40203	5.4173	5.00692	6.14657	4.53799	6.5665	4.07312	4.67071
G1	ENSG00000170367	CST5	protein_coding	0.974689	1.01065	0.477496	0.370406	0.660465	0.290221	0.214756	0.172157	0.241779	0.272484
G1	ENSG00000170385	SLC30A1	protein_coding	106.462	97.6407	42.5448	42.7484	57.947	58.9129	44.8422	44.3843	16.4078	16.1376
G1	ENSG00000170419	VSTM2A	protein_coding	0.212266	0.260388	0.024765	0.029252	0.207952	0.067301	0.072554	0.008064	0.02112	0
G1	ENSG00000170458	CD14	protein_coding	0.496211	0.721649	0.008827	0.027989	0.050495	0.035805	0.143718	0.087392	0.088514	0.150655
G1	ENSG00000170500	LONRF2	protein_coding	2.81203	2.72229	1.67277	1.84316	3.24691	3.3883	1.08383	1.00421	0.715191	0.643597
G1	ENSG00000170561	IRX2	protein_coding	0.035581	0.127995	0.030657	0	0.056323	0.1074	0.010358	0.015659	0.008861	0.022345
G1	ENSG00000170631	ZNF16	protein_coding	11.8261	10.9739	5.88887	6.13795	8.83106	9.36413	9.10123	10.2914	7.53376	6.5149
G1	ENSG00000170684	ZNF296	protein_coding	5.5583	6.34182	3.6477	3.31637	5.12287	6.35867	5.28102	5.69517	3.68395	3.94719
G1	ENSG00000170786	SDR16C5	protein_coding	0.45107	0.572736	0.190113	0.2488	0.402387	0.413253	0.079582	0.071954	0.133188	0.038617
G1	ENSG00000170881	RNF139	protein_coding	86.1014	80.5315	48.9886	49.4553	59.5153	61.6621	59.0744	59.2769	30.2618	30.2616
G1	ENSG00000170961	HAS2	protein_coding	9.71622	8.14514	1.3615	1.14504	2.96627	3.41761	2.23837	2.43713	0.509288	0.524707
G1	ENSG00000170989	S1PR1	protein_coding	3.77998	3.62363	1.55792	1.07134	2.69039	2.93637	2.79043	3.05027	0.903189	0.981153
G1	ENSG00000171044	XKR6	protein_coding	2.95871	3.14614	2.12443	1.51882	1.49369	1.71465	1.94665	1.62095	1.06509	1.1906
G1	ENSG00000171094	ALK	protein_coding	0.136177	0.098861	0.063101	0.032535	0.038687	0.032057	0.159484	0.167049	0.014426	0.026976
G1	ENSG00000171223	JUNB	protein_coding	130.872	135.57	47.2787	48.2052	103.716	123.355	28.5807	27.6944	20.2948	21.0369
G1	ENSG00000171368	TPPP	protein_coding	3.01779	2.94739	2.11756	2.16057	1.70034	1.86109	1.25824	1.34653	1.37101	1.41481
G1	ENSG00000171451	DSEL	protein_coding	8.83995	8.69013	5.04718	5.19418	5.52714	5.25572	4.509	4.66305	3.27437	3.33766
G1	ENSG00000171574	ZNF584	protein_coding	7.3769	6.79799	6.54662	6.35571	5.68239	6.66256	4.19886	4.88148	4.45224	5.70609
G1	ENSG00000171606	ZNF274	protein_coding	29.502	27.8253	22.224	22.7699	22.6201	26.9567	26.8035	27.4959	17.9784	18.9468
G1	ENSG00000171617	ENC1	protein_coding	114.91	110.829	41.3102	42.7472	84.3115	92.9638	111.204	107.086	37.1199	37.3792
G1	ENSG00000171873	ADRA1D	protein_coding	0.30491	0.32531	0.059178	0.024619	0.223704	0.372547	0	0	0.012643	0
G1	ENSG00000171940	ZNF217	protein_coding	38.3005	39.4661	25.965	27.0823	34.5145	42.0453	37.4933	36.7953	18.2942	17.1189
G1	ENSG00000171970	ZNF57	protein_coding	10.1711	10.1881	5.28158	5.15427	7.34879	7.85714	6.20756	6.25648	2.98308	2.85668
G1	ENSG00000172201	ID4	protein_coding	16.3167	14.4015	3.96254	3.95408	9.52139	10.0124	3.52946	3.91259	3.33956	3.44651
G1	ENSG00000172216	CEBPB	protein_coding	216.892	197.888	79.1265	75.1002	99.9611	115.748	48.4428	50.1836	47.0259	55.7919
G1	ENSG00000172748	ZNF596	protein_coding	3.72955	0.656055	0.179964	2.342	0.206586	1.93467	2.08716	1.66276	0.299253	1.18048
G1	ENSG00000172752	COL6A5	protein_coding	0.019173	0.027289	0.00872	0.011091	0.005601	0.005326	0.00439	0.03823	0.002492	0
G1	ENSG00000173110	HSPA6	protein_coding	2.12402	2.89158	0.740312	0.829211	2.02701	1.62892	2.02812	2.33945	0.570947	0.472958
G1	ENSG00000173237	C11orf86	protein_coding	2.88713	2.81153	0.128356	0.26345	3.21361	3.15488	0.172655	0.33095	0.175646	0.172192
G1	ENSG00000173253	DMRT2	protein_coding	0.139716	0.125266	0.039798	0.050433	0.052405	0.032008	0.045958	0.079835	0.061209	0
G1	ENSG00000173334	TRIB1	protein_coding	50.8698	53.824	18.2011	18.3219	32.2446	44.8284	21.8979	27.1367	9.36626	10.6077
G1	ENSG00000173451	THAP2	protein_coding	5.24446	5.29222	2.87698	2.6077	2.59712	2.89773	2.03977	2.87213	1.61548	1.21446
G1	ENSG00000173875	ZNF791	protein_coding	9.94369	5.30668	2.47752	3.12112	4.12055	5.65884	2.73836	2.49536	1.48336	4.43724
G1	ENSG00000174004	NRROS	protein_coding	0.468874	0.401901	0.237158	0.284585	0.120527	0.090246	0.080214	0.19959	0.125884	0.157443
G1	ENSG00000174010	KLHL15	protein_coding	7.49584	6.65527	4.60715	4.73147	4.49527	4.79043	5.179	4.81	3.7777	3.74853
G1	ENSG00000174136	RGMB	protein_coding	38.686	40.654	26.9091	25.8496	22.5025	23.9735	32.4321	31.3542	22.2202	25.0574
G1	ENSG00000174206	C12orf66	protein_coding	6.71619	5.67039	3.32993	3.16087	3.73034	3.76445	2.38695	2.82552	2.41816	2.51333
G1	ENSG00000174276	ZNHIT2	protein_coding	14.469	14.2324	8.13164	7.65529	10.9326	11.347	8.35764	7.90711	4.78867	6.15977
G1	ENSG00000175040	CHST2	protein_coding	22.2315	21.8911	9.58165	8.36159	13.0292	13.4442	8.56684	9.03827	11.0139	11.8801
G1	ENSG00000175197	DDIT3	protein_coding	27.566	24.6769	13.2454	15.7802	8.93506	10.301	7.35432	9.09519	9.09803	9.66201
G1	ENSG00000175213	ZNF408	protein_coding	18.763	18.6846	12.4474	13.3287	16.7141	17.1566	13.8812	14.8578	8.18346	8.82926
G1	ENSG00000175302	ANKRD30BP1	unprocessed_pseudogene	0.734077	0.728488	0.218089	0.298156	0.480601	0.384069	0.66358	0.603813	0.233098	0.352792
G1	ENSG00000175426	PCSK1	protein_coding	0.411216	0.346216	0.102989	0.103276	0.40778	0.349063	0.115769	0.127806	0.03826	0.059117
G1	ENSG00000175592	FOSL1	protein_coding	208.202	246.617	51.302	43.5457	100.435	115.919	90.7554	80.525	122.755	118.243
G1	ENSG00000175841	FAM172BP	processed_pseudogene	0.699314	0.471598	0.259901	0.218794	0.469965	0.601696	0.475443	0.660992	0.106857	0.040906
G1	ENSG00000175857	GAPT	protein_coding	0.047612	0.034023	0	0	0.041454	0.077778	0	0.046012	0.010851	0
G1	ENSG00000175984	DENND2C	protein_coding	6.16586	5.99395	3.29425	3.51646	3.99972	2.83407	3.28575	2.60422	1.81773	1.72949
G1	ENSG00000176125	UFSP1	protein_coding	3.58015	2.70391	1.16267	1.54189	2.56773	2.20621	1.27662	1.26373	1.15073	1.45507
G1	ENSG00000176318	FOXN3P1	processed_pseudogene	0.256619	0.32021	0.097843	0.033224	0.099403	0.115161	0.029634	0.129586	0.078416	0.034097
G1	ENSG00000176399	DMRTA1	protein_coding	8.14191	7.07071	2.85341	2.66269	2.41651	2.49243	2.18687	1.84798	1.29474	1.29224
G1	ENSG00000176593	AC008969.1	processed_transcript	6.05876	5.57106	4.68965	4.60149	2.85833	2.85741	5.27591	4.73473	2.12058	1.86518
G1	ENSG00000176697	BDNF	protein_coding	38.2184	26.2026	11.9127	11.2666	13.6782	16.6113	12.5427	14.1881	8.79385	8.16594
G1	ENSG00000176896	TCEANC	protein_coding	0.509495	0.35375	0.361226	0.19307	0.34463	0.229504	0.474553	0.420502	0.298918	0.267729
G1	ENSG00000177144	NUDT4B	protein_coding	8.02166	8.82887	4.55023	4.72113	4.60566	4.59404	6.4064	6.56341	6.69796	6.92143
G1	ENSG00000177173	NAP1L4P1	processed_pseudogene	10.9867	9.87966	3.09221	3.63566	3.60788	3.54913	5.79851	5.7274	2.41673	2.83432
G1	ENSG00000177182	CLVS1	protein_coding	0.080357	0.085683	0.00742	0.008143	0.002861	0.003409	0.012134	0.012453	0.011703	0.074511
G1	ENSG00000177191	B3GNT8	protein_coding	0.158887	0.156652	0.025308	0.014422	0.175184	0.071334	0.0639	0.053081	0.060189	0.057364
G1	ENSG00000177283	FZD8	protein_coding	14.0063	14.0752	4.50076	4.69057	9.29095	8.01342	2.34545	2.69304	0.843512	0.977095
G1	ENSG00000177606	JUN	protein_coding	155.361	159.391	100.177	102.98	89.2152	98.7433	82.3323	89.8164	73.7122	79.9585
G1	ENSG00000177688	SUMO4	protein_coding	2.19599	2.08065	0.464867	0.740753	0.567586	0.708955	1.14568	1.11217	0.662043	0.747045
G1	ENSG00000177707	NECTIN3	protein_coding	71.1638	65.0465	26.0317	29.329	31.6681	30.8842	30.0128	29.243	31.063	30.2293
G1	ENSG00000177721	ANXA2R	protein_coding	0.656521	0.733854	0.026362	0.056239	0.119667	0.096455	0.060556	0.202595	0.054715	0.13858
G1	ENSG00000177875	CCDC184	protein_coding	8.71405	8.24605	5.21051	4.89354	7.27994	7.31956	4.35738	5.54878	1.34293	1.69989
G1	ENSG00000178127	NDUFV2	protein_coding	180.172	164.22	164.671	166.421	152.566	177.363	117.075	136.089	215.381	209.164
G1	ENSG00000178150	ZNF114	protein_coding	10.1225	9.78186	6.19154	5.86536	2.95363	7.37207	2.52839	6.71425	1.89835	1.2429
G1	ENSG00000178209	PLEC	protein_coding	671.314	632.84	251.948	288.233	436.592	403.165	357.175	382.287	368.736	405.798
G1	ENSG00000178229	ZNF543	protein_coding	4.5366	4.30832	2.83542	2.95241	3.1502	2.92224	3.1432	3.13909	1.25571	1.56443
G1	ENSG00000178233	TMEM151B	protein_coding	0.241015	0.293824	0.063499	0.075211	0.137575	0.150447	0.086509	0.109764	0.079062	0.076379
G1	ENSG00000178235	SLITRK1	protein_coding	0.029437	0.045564	0.00395	0	0.005572	0.004774	0.026214	0.038728	0.004012	0.009269
G1	ENSG00000178338	ZNF354B	protein_coding	19.097	18.1236	16.7321	13.9637	16.4818	15.5991	21.2987	20.7556	6.99115	6.29521
G1	ENSG00000178404	CEP295NL	protein_coding	7.96764	10.7645	2.0307	1.48761	1.48517	1.68199	1.9652	1.73275	1.63901	2.05681
G1	ENSG00000178409	BEND3	protein_coding	9.2269	9.59953	3.7067	3.79129	7.75367	7.67932	3.54766	3.89287	5.97124	5.98622
G1	ENSG00000178440	LINC00843	lincRNA	3.95064	3.26665	2.54895	1.55561	3.04483	2.46172	3.271	3.38163	2.38567	2.68322
G1	ENSG00000178462	TUBAL3	protein_coding	0.232672	0.351782	0	0.090339	0.202337	0.32729	0.174748	0.013912	0	0.01401
G1	ENSG00000178502	KLHL11	protein_coding	15.9608	16.1075	9.3344	10.6118	10.2603	10.2907	12.7441	12.8886	5.95492	6.16847
G1	ENSG00000178573	MAF	protein_coding	35.4025	34.4351	9.53683	9.28445	12.8017	10.8894	7.0857	5.79901	4.9611	3.34083
G1	ENSG00000178607	ERN1	protein_coding	31.1983	32.4575	11.8297	10.4515	16.8146	19.1771	11.7186	13.5025	13.8916	13.2814
G1	ENSG00000178636	AC092656.1	transcribed_processed_pseudogene	0.280862	0.404287	0.18495	0.043205	0.206562	0.426494	0.019497	0.098943	0.033728	0.029232
G1	ENSG00000178695	KCTD12	protein_coding	7.26087	7.40764	4.47499	4.36559	5.91091	6.77051	3.90139	4.09703	4.05054	4.10768
G1	ENSG00000178965	ERICH3	protein_coding	0.034397	0.044103	0.00722	0.015631	0.015151	0.009977	0.028944	0.013363	0.018891	0
G1	ENSG00000178977	LINC00324	lincRNA	0.605078	0.457289	0.178004	0.108624	0.165512	0.103487	0.087445	0.044286	0.087271	0.1678
G1	ENSG00000179046	TRIML2	protein_coding	38.8764	46.0282	20.345	18.4014	42.0121	47.9988	23.729	26.1368	6.00962	6.90719
G1	ENSG00000179059	ZFP42	protein_coding	0.190186	0.35335	0	0.010129	0.059854	0.071408	0.051881	0.022283	0	0
G1	ENSG00000179094	PER1	protein_coding	18.1025	19.6254	7.04819	7.27416	8.64454	10.0502	5.94955	6.03845	7.33857	8.64045
G1	ENSG00000179219	LINC00311	lincRNA	0.394018	0.501538	0.006888	0.100202	0.24729	0.060299	0.235937	0.152773	0.133609	0.100518
G1	ENSG00000179348	GATA2	protein_coding	1.24336	1.97062	0.995212	1.12291	0.735399	1.0525	0.456681	0.384519	0.677015	0.738652
G1	ENSG00000179542	SLITRK4	protein_coding	11.2633	10.6749	8.7951	8.10064	12.143	11.9973	5.3681	6.49283	3.00251	3.2074
G1	ENSG00000179674	ARL14	protein_coding	39.5328	38.1764	10.05	9.64835	18.7169	29.2483	8.17212	8.6497	2.81617	2.63354
G1	ENSG00000179774	ATOH7	protein_coding	0.383658	0.501714	0.366169	0.200628	0.280051	0.184302	0.11019	0.027826	0.105553	0.217092
G1	ENSG00000179817	MRGPRX4	protein_coding	0.274869	0.350648	0	0	0.270535	0.287033	0.268217	0.331321	0.024101	0
G1	ENSG00000179930	ZNF648	protein_coding	0.212439	0.16347	0.080748	0.094724	0.25948	0.14587	0.109591	0.134149	0.018564	0.006834
G1	ENSG00000179935	LINC00652	lincRNA	0.381652	0.178904	0.120734	0.20967	0.162395	0.291143	0.130327	0.125082	0.10462	0.128622
G1	ENSG00000180251	SLC9A4	protein_coding	0.347198	0.267022	0.24777	0.319697	0.136997	0.181488	0.101004	0.096353	0.088009	0.047001
G1	ENSG00000180257	ZNF816	protein_coding	12.4909	10.449	8.06887	7.6768	7.83542	8.04747	6.66797	7.21477	3.82487	3.0248
G1	ENSG00000180447	GAS1	protein_coding	3.43658	3.24786	2.62212	2.35629	1.92648	1.45837	0.59123	0.413406	1.03415	1.14546
G1	ENSG00000180479	ZNF571	protein_coding	2.0296	1.89136	2.41961	2.07736	1.36192	1.01134	1.64051	2.50291	0.389539	0.762833
G1	ENSG00000180530	NRIP1	protein_coding	19.0867	17.8828	9.75575	10.8654	13.3619	12.885	12.7084	12.4525	11.2057	10.6474
G1	ENSG00000180573	HIST1H2AC	protein_coding	86.4262	77.2923	5.38582	4.99643	40.324	44.0193	42.304	38.838	22.1525	18.6484
G1	ENSG00000180596	HIST1H2BC	protein_coding	69.1542	65.2198	10.3134	8.43526	51.3364	72.7984	29.2582	34.8319	15.7719	17.5092
G1	ENSG00000180660	MAB21L1	protein_coding	1.18818	1.1842	0.746409	0.552039	0.815342	0.702977	0.320089	0.33341	0.11837	0.167607
G1	ENSG00000180777	ANKRD30B	protein_coding	1.00215	1.03186	0.2446	0.266115	0.344447	0.417393	0.548635	0.449359	0.088062	0.147705
G1	ENSG00000180957	PITPNB	protein_coding	171.37	172.624	134.991	139.159	157.778	177.471	176.602	180.52	104.186	94.4461
G1	ENSG00000181029	TRAPPC5	protein_coding	8.25419	7.91629	8.58542	10.0167	8.98513	9.24627	7.503	6.90318	7.53138	11.2364
G1	ENSG00000181222	POLR2A	protein_coding	102.661	104.63	39.885	41.8431	57.0473	56.1591	58.1688	57.498	60.9578	64.7251
G1	ENSG00000181274	FRAT2	protein_coding	13.6035	12.2438	5.92913	6.53005	9.32961	10.1084	6.24735	6.39506	3.54477	3.32605
G1	ENSG00000181449	SOX2	protein_coding	5.47621	4.35834	1.84609	1.7933	1.43208	1.66098	2.54237	1.64742	1.92844	2.22349
G1	ENSG00000181467	RAP2B	protein_coding	25.0056	22.4161	13.7312	14.2603	15.0719	14.4889	15.1427	14.4858	11.7934	12.6919
G1	ENSG00000182196	ARL6IP4	protein_coding	92.08	92.1068	91.0717	89.2549	84.6574	84.6296	69.4136	77.041	102.572	109.273
G1	ENSG00000182224	CYB5D1	protein_coding	5.90677	6.10952	2.77803	2.66315	3.20087	3.86348	3.33695	3.82616	2.08231	3.27813
G1	ENSG00000182253	SYNM	protein_coding	0.775582	0.715683	0.482163	0.575413	0.599652	0.699663	0.408685	0.430418	0.250369	0.247597
G1	ENSG00000182308	DCAF4L1	protein_coding	1.19834	0.994112	0.363429	0.393835	0.420896	0.346086	0.632774	0.644689	0.44413	0.622101
G1	ENSG00000182318	ZSCAN22	protein_coding	2.59644	2.95098	1.92971	1.74939	1.75291	1.69326	2.40455	2.33815	0.807795	0.726798
G1	ENSG00000182324	KCNJ14	protein_coding	3.35798	3.2711	2.76488	1.86494	2.05255	1.89219	2.82248	2.98044	1.43553	1.38997
G1	ENSG00000182405	PGBD4	protein_coding	2.92741	2.76487	2.41691	2.15903	1.957	1.89317	1.71394	1.88576	1.07953	1.14025
G1	ENSG00000182810	DDX28	protein_coding	13.8736	14.1756	7.21137	5.91387	8.96463	9.53093	6.52654	6.42583	6.88172	7.25868
G1	ENSG00000182816	KRTAP13-2	protein_coding	0.459753	0.506236	0	0	0.312795	0.350927	0.049434	0.024967	0	0
G1	ENSG00000183154	AC138356.1	antisense	0.180041	0.153492	0.080407	0.101222	0.155058	0.097554	0.069343	0.070483	0.029683	0.095835
G1	ENSG00000183161	FANCF	protein_coding	9.69991	9.75481	4.98676	5.79629	6.3975	6.41084	4.81253	4.81963	5.18891	5.61633
G1	ENSG00000183354	KIAA2026	protein_coding	6.10521	7.20162	5.36275	4.26224	3.66928	4.21342	5.80099	4.73048	4.12033	4.51515
G1	ENSG00000183778	B3GALT5	protein_coding	1.06824	2.40714	1.69701	0.850283	0.639745	1.72512	0.564942	0.798267	1.23062	0.315882
G1	ENSG00000183779	ZNF703	protein_coding	35.4328	36.664	17.8923	15.7047	21.1667	18.3296	20.3179	21.8317	16.0816	19.3886
G1	ENSG00000183785	TUBA8	protein_coding	0.531073	0.282064	0.570461	0.420358	0.319449	0.377505	0.824432	0.291009	0.40714	0.134781
G1	ENSG00000183808	RBM12B	protein_coding	47.0286	33.047	37.8076	28.7867	18.112	26.3313	23.8093	34.6023	26.6914	18.3426
G1	ENSG00000183960	KCNH8	protein_coding	0.398501	0.597613	0.177556	0.134964	0.246313	0.264717	0.33077	0.276369	0.103531	0.065167
G1	ENSG00000184226	PCDH9	protein_coding	1.5044	1.20435	1.73549	2.52869	1.52875	1.3287	0.663799	0.933703	0.537148	0.544491
G1	ENSG00000184371	CSF1	protein_coding	13.1596	14.1952	9.72451	8.63464	9.56771	11.3355	4.08766	4.25302	3.61104	4.76714
G1	ENSG00000184530	C6orf58	protein_coding	0.284807	0.282181	0.018779	0.022597	0.084572	0.089279	0.086966	0.060449	0	0.05229
G1	ENSG00000184564	SLITRK6	protein_coding	0.708438	0.697455	0.308105	0.264579	0.303279	0.268987	0.775674	0.505034	0.047425	0.052662
G1	ENSG00000184588	PDE4B	protein_coding	9.48489	7.86632	1.86245	2.443	6.97586	7.40928	4.76679	5.03841	1.43886	1.32879
G1	ENSG00000184678	HIST2H2BE	protein_coding	97.5703	100.692	13.0094	12.5205	21.2595	22.5429	16.0751	14.3803	18.3993	17.5415
G1	ENSG00000184897	H1FX	protein_coding	454.502	449.354	198.709	186.682	282.208	277.58	264.338	262.846	256.372	308.928
G1	ENSG00000184937	WT1	protein_coding	14.3622	16.2342	12.8853	13.0045	15.6437	13.521	9.90166	13.593	12.0679	12.1308
G1	ENSG00000185022	MAFF	protein_coding	38.4385	36.7014	8.15573	8.19396	25.6719	38.4638	7.93646	28.5868	26.2021	7.35722
G1	ENSG00000185112	FAM43A	protein_coding	10.8196	10.0229	2.54852	2.83054	2.27642	2.73118	2.12626	2.1417	2.78052	3.20921
G1	ENSG00000185130	HIST1H2BL	protein_coding	1.63138	1.19503	0.281266	0.166332	0.411325	0.371332	0.333812	0.497319	0.518461	0.454345
G1	ENSG00000185479	KRT6B	protein_coding	0.140715	0.232726	0.023634	0.01158	0.039244	0	0.066026	0.060249	0.01525	0.033115
G1	ENSG00000185551	NR2F2	protein_coding	88.9354	90.4248	45.2342	44.9988	66.7893	69.1859	52.5324	59.9224	48.4883	45.5678
G1	ENSG00000185610	DBX2	protein_coding	0.178421	0.154443	0.009578	0.054923	0.06554	0.119119	0	0.0153	0.016472	0.027112
G1	ENSG00000185650	ZFP36L1	protein_coding	342.84	390.359	167.357	162.959	221.144	259.174	207.309	218.039	125.378	127.561
G1	ENSG00000185730	ZNF696	protein_coding	28.0311	26.0402	10.4424	16.523	22.1506	20.898	6.98179	19.1303	6.17519	17.093
G1	ENSG00000185883	ATP6V0C	protein_coding	224.348	243.707	196.364	181.607	213.296	195.801	207.046	181.721	178.848	223.602
G1	ENSG00000185900	POMK	protein_coding	4.64799	4.73182	3.64428	3.78956	3.67325	2.96593	3.73816	6.84518	2.37795	2.54215
G1	ENSG00000185920	PTCH1	protein_coding	9.9324	11.0064	7.36866	6.94836	6.68746	5.38424	6.43952	5.23806	5.42244	5.01871
G1	ENSG00000186019	AC021092.1	antisense	5.36593	5.62045	3.66159	3.17573	5.66138	5.36705	4.28458	4.37715	3.14613	3.51837
G1	ENSG00000186130	ZBTB6	protein_coding	9.66605	10.1573	6.57808	7.61883	6.68657	6.69376	7.59016	8.05045	5.55058	5.0221
G1	ENSG00000186174	BCL9L	protein_coding	40.8407	47.0379	20.8277	27.3492	36.9534	33.4605	30.6156	33.7535	25.7416	27.9382
G1	ENSG00000186222	BLOC1S4	protein_coding	16.675	16.3733	10.6708	10.8398	14.349	16.5223	9.50319	10.4714	8.42421	10.2535
G1	ENSG00000186230	ZNF749	protein_coding	22.3357	20.8548	15.7272	13.9301	14.1941	14.1653	13.4076	13.355	8.23298	8.93826
G1	ENSG00000186272	ZNF17	protein_coding	4.88124	2.96049	4.50289	1.19942	1.73565	1.53297	1.37689	2.00596	1.27793	1.19542
G1	ENSG00000186352	ANKRD37	protein_coding	7.00813	5.90839	3.00174	3.56489	3.89839	4.65276	3.40344	3.60246	2.6661	3.48195
G1	ENSG00000186446	ZNF501	protein_coding	2.43378	2.44865	1.26722	1.01195	1.62955	1.41231	1.10237	0.825332	0.815396	0.902803
G1	ENSG00000186469	GNG2	protein_coding	3.58487	3.77932	2.32706	2.07377	1.12381	1.625	3.74144	3.77364	1.14485	1.9587
G1	ENSG00000186652	PRG2	protein_coding	0.18292	0.178442	0.05043	0.00577	0.119745	0.053918	0.088603	0.245589	0.096344	0.094878
G1	ENSG00000186810	CXCR3	protein_coding	0.285868	0.182425	0	0	0.135632	0.118743	0.063872	0.088953	0	0
G1	ENSG00000187193	MT1X	protein_coding	82.2254	81.3929	44.8355	42.2143	70.9793	72.2435	61.6756	56.5756	48.4013	48.9079
G1	ENSG00000187475	HIST1H1T	protein_coding	0.383378	0.416733	0.012269	0.037641	0.249832	0.06901	0.265453	0.222019	0.082728	0.092299
G1	ENSG00000187479	C11orf96	protein_coding	6.70224	6.89916	3.93217	3.68725	2.53251	3.27286	0.85547	1.08886	2.13907	2.84069
G1	ENSG00000187601	MAGEH1	protein_coding	45.4807	42.8919	34.5938	32.9014	29.4566	28.0269	26.1915	26.7572	19.0713	19.2174
G1	ENSG00000187626	ZKSCAN4	protein_coding	6.46263	5.58517	4.82996	4.3751	6.36631	5.75381	4.83229	5.15018	1.85649	1.73792
G1	ENSG00000187678	SPRY4	protein_coding	5.6481	8.59121	1.41271	1.8998	2.81525	3.38677	3.26909	3.62757	0.804983	0.835517
G1	ENSG00000187801	ZFP69B	protein_coding	45.3394	44.5351	19.2962	20.665	30.0946	35.6002	28.6934	29.1179	22.1226	22.0073
G1	ENSG00000187815	ZFP69	protein_coding	14.6552	13.6035	5.58558	5.67712	8.4725	9.2619	6.37753	6.24129	6.85612	6.36915
G1	ENSG00000187957	DNER	protein_coding	0.532311	0.529202	0.240714	0.058088	0.223438	0.327438	0.402042	0.276384	0.18223	0.284678
G1	ENSG00000188033	ZNF490	protein_coding	1.7289	2.36545	1.2196	1.61071	1.29606	1.02363	0.589476	1.61436	0.569757	0.620439
G1	ENSG00000188042	ARL4C	protein_coding	116.441	104.762	22.0713	20.2957	31.0379	31.9621	35.8821	33.083	20.3474	22.642
G1	ENSG00000188167	TMPPE	protein_coding	6.43212	6.05214	2.96754	3.59167	3.58136	3.55884	2.72762	2.974	1.90397	2.002
G1	ENSG00000188295	ZNF669	protein_coding	9.43815	9.00755	6.61483	7.58835	5.35486	6.03564	6.72706	7.14975	2.47072	3.76165
G1	ENSG00000188483	IER5L	protein_coding	24.6273	22.0634	8.83385	7.77197	13.9549	12.2356	11.6056	11.7034	4.55081	6.09456
G1	ENSG00000188761	BCL2L15	protein_coding	0.590576	0.602331	0.170752	0.238699	0.33032	0.169504	0.48264	0.389568	0.120557	0.201339
G1	ENSG00000189060	H1F0	protein_coding	1952.11	1927.13	321.478	314.571	937.055	1027.08	1067.98	1021.3	304.516	315.399
G1	ENSG00000189149	CRYM-AS1	transcribed_unitary_pseudogene	2.50657	2.23933	1.65875	0.699161	1.41814	1.21922	1.80081	1.66549	1.56597	1.66765
G1	ENSG00000189233	NUGGC	protein_coding	0.040971	0.024479	0	0	0.020884	0	0.027869	0.014016	0	0.006481
G1	ENSG00000189320	FAM180A	protein_coding	0.450971	0.563691	0.046895	0.052581	0.314331	0.670824	0.275387	0.557283	0.032898	0.119941
G1	ENSG00000189369	GSPT2	protein_coding	45.6855	47.2337	20.132	21.8193	19.6336	21.6746	24.436	25.389	19.7484	19.0913
G1	ENSG00000196152	ZNF79	protein_coding	7.92003	7.84728	5.01196	4.6831	3.42088	3.20659	3.36862	4.11604	1.51678	1.75292
G1	ENSG00000196189	SEMA4A	protein_coding	0.155698	0.320003	0.016316	0	0.208873	0.289568	0.09555	0.012452	0.031987	0.041448
G1	ENSG00000196277	GRM7	protein_coding	0.286019	0.379481	0.258622	0.202329	0.195636	0.207462	0.132422	0.115746	0.028052	0.08694
G1	ENSG00000196345	ZKSCAN7	protein_coding	1.32792	1.11603	0.94866	0.829753	0.833692	0.948236	1.1378	0.791818	0.139646	0.359442
G1	ENSG00000196357	ZNF565	protein_coding	3.67911	4.70625	1.74215	1.55101	2.23005	2.03221	2.74128	3.0492	2.10372	2.57097
G1	ENSG00000196378	ZNF34	protein_coding	2.50138	1.39066	1.11944	1.3464	1.95032	1.51092	1.48703	1.2006	0.859761	1.10406
G1	ENSG00000196417	ZNF765	protein_coding	9.17234	8.98959	7.04112	6.95068	6.82471	6.05607	6.89439	7.24181	6.01719	6.65557
G1	ENSG00000196418	ZNF124	protein_coding	13.2229	14.589	8.94073	8.93253	7.47393	9.10449	8.13816	7.91944	5.44841	5.2879
G1	ENSG00000196428	TSC22D2	protein_coding	36.9116	38.1987	31.7398	16.4086	33.0982	35.0664	29.4007	29.7013	26.3879	14.1288
G1	ENSG00000196611	MMP1	protein_coding	1.00553	1.13124	0.04102	0.066622	0.208701	0.183717	0.366807	0.244479	0.140182	0.14857
G1	ENSG00000196664	TLR7	protein_coding	0.074885	0.047904	0	0	0.041932	0.030904	0.005418	0	0	0.00722
G1	ENSG00000196724	ZNF418	protein_coding	1.4827	1.24936	0.765925	0.649088	0.823568	0.870722	0.318122	1.0917	0.103391	0.027341
G1	ENSG00000196747	HIST1H2AI	protein_coding	15.0876	16.6159	1.08454	1.35225	4.12295	4.93572	2.63924	2.87706	2.46411	3.40234
G1	ENSG00000196756	SNHG17	processed_transcript	24.299	21.1329	15.0173	13.6284	20.2158	19.7849	23.0521	25.1068	15.4654	17.1058
G1	ENSG00000196781	TLE1	protein_coding	46.0761	46.4078	20.8487	20.6486	15.193	15.8434	20.1803	20.7396	25.8104	25.7305
G1	ENSG00000196782	MAML3	protein_coding	4.38358	4.8563	0.72595	0.621686	3.47896	3.54277	3.48927	3.4651	1.07774	1.04296
G1	ENSG00000196787	HIST1H2AG	protein_coding	20.7712	19.8364	7.27975	6.56613	7.67227	9.16315	5.09513	5.34194	7.53996	7.89843
G1	ENSG00000196873	CBWD3	protein_coding	42.3024	43.0026	28.0004	27.6761	26.8705	34.485	32.2518	33.8338	35.8016	33.0811
G1	ENSG00000197019	SERTAD1	protein_coding	31.1438	27.8438	21.7892	23.1326	18.7474	19.9739	15.4454	16.4814	13.7958	17.4273
G1	ENSG00000197044	ZNF441	protein_coding	4.67183	3.90063	2.94489	3.34109	4.78286	5.06311	3.2827	3.08166	1.18198	0.865543
G1	ENSG00000197182	MIRLET7BHG	lincRNA	4.88434	5.2131	3.56939	2.93385	4.2324	3.53654	4.19978	4.55741	3.22829	4.05394
G1	ENSG00000197208	SLC22A4	protein_coding	6.93225	5.67483	5.32501	5.1126	7.00888	6.36226	6.20601	5.22821	1.44998	1.92149
G1	ENSG00000197238	HIST1H4J	protein_coding	20.3908	20.5686	5.20985	4.31495	5.16961	4.96836	4.35963	4.48396	7.70079	8.12036
G1	ENSG00000197483	ZNF628	protein_coding	2.6766	2.79504	1.56821	1.88108	2.27931	2.00243	1.12663	1.55233	1.24692	2.54807
G1	ENSG00000197506	SLC28A3	protein_coding	0.331575	0.285434	0.069793	0.06899	0.123979	0.112766	0.085953	0.144816	0.094738	0.067552
G1	ENSG00000197579	TOPORS	protein_coding	67.4621	62.2143	44.6948	43.7795	48.7619	53.7468	51.3276	48.8789	34.1021	32.3052
G1	ENSG00000197588	KLKP1	transcribed_unprocessed_pseudogene	0.69718	0.620575	0.084789	0.011442	0.385298	0.103017	0.100372	0.184526	0.021335	0.033674
G1	ENSG00000197608	ZNF841	protein_coding	14.9059	7.74303	9.84989	10.4669	10.3427	11.3871	15.7209	16.0154	4.29916	2.72025
G1	ENSG00000197647	ZNF433	protein_coding	3.17421	2.57145	1.71842	1.74822	2.04894	2.12235	1.14047	1.71985	1.2369	1.30644
G1	ENSG00000197714	ZNF460	protein_coding	3.61386	4.22185	4.15785	2.87281	3.04733	4.59763	5.78061	5.06833	1.4502	1.6414
G1	ENSG00000197780	TAF13	protein_coding	157.242	147.118	82.5548	92.5149	113.242	123.617	84.7953	95.252	84.1996	96.0774
G1	ENSG00000197837	HIST4H4	protein_coding	15.6702	14.6769	4.22674	3.32572	5.57583	5.71663	5.13494	4.97579	1.75645	1.77692
G1	ENSG00000197903	HIST1H2BK	protein_coding	1099.68	988.881	211.948	197.063	611.171	721.117	587.759	671.49	630.529	640.315
G1	ENSG00000198010	DLGAP2	protein_coding	0.081053	0.353098	0.16509	0.060494	0.259333	0.306189	0.200318	0.202373	0.168443	0.071444
G1	ENSG00000198018	ENTPD7	protein_coding	31.4276	29.3905	16.0665	17.2531	34.4203	36.1196	28.014	29.9603	15.8172	17.0622
G1	ENSG00000198081	ZBTB14	protein_coding	20.2354	8.95031	9.23323	8.93201	18.4986	17.0479	11.6498	4.34599	9.4094	3.01039
G1	ENSG00000198298	ZNF485	protein_coding	6.94033	8.02308	3.27149	3.15998	4.58219	4.5463	4.73456	5.36988	1.98322	4.98152
G1	ENSG00000198300	PEG3	protein_coding	15.0557	19.2647	3.69576	10.1157	7.78374	3.43811	3.96083	8.62192	9.02424	7.15698
G1	ENSG00000198312	BMS1P9	unprocessed_pseudogene	2.54594	2.25347	0.899404	0.921068	1.88144	1.75666	1.15815	1.26445	1.02093	1.23498
G1	ENSG00000198342	ZNF442	protein_coding	1.094	0.880337	0.702293	0.504571	0.563971	0.747842	0.610931	0.684381	0.290412	0.501904
G1	ENSG00000198369	SPRED2	protein_coding	118.831	116.214	46.1754	45.4024	56.5909	60.3838	53.0475	52.5373	61.7751	62.1512
G1	ENSG00000198576	ARC	protein_coding	114.622	121.825	43.8327	45.4311	59.8291	71.6589	35.8768	40.518	19.2602	25.0064
G1	ENSG00000198783	ZNF830	protein_coding	29.21	29.1928	14.7827	14.0387	18.263	20.5501	24.9455	26.3922	12.4533	11.9226
G1	ENSG00000198785	GRIN3A	protein_coding	0.061035	0.050223	0.021575	0.033272	0.022292	0.033541	0.03839	0.024577	0	0.002959
G1	ENSG00000198807	PAX9	protein_coding	1.53833	1.9431	1.16667	1.05933	1.17433	1.24733	0.681874	0.585718	0.321066	0.438142
G1	ENSG00000198815	FOXJ3	protein_coding	73.6448	72.0097	32.3162	31.1917	37.8927	17.0346	24.17	57.8764	13.2445	13.0406
G1	ENSG00000198835	GJC2	protein_coding	1.79599	1.51192	1.01994	0.937263	1.54764	1.5579	1.15449	0.909474	0.714858	1.20357
G1	ENSG00000198841	KTI12	protein_coding	25.1266	24.4212	10.7953	9.43143	15.6499	15.8586	10.8866	10.89	7.57716	9.06326
G1	ENSG00000198900	TOP1	protein_coding	331.464	299.682	83.2349	87.4366	134.133	155.154	166.643	164.757	190.141	184.127
G1	ENSG00000198945	L3MBTL3	protein_coding	14.8886	14.4047	11.5201	10.7028	13.9202	14.2667	9.77795	8.64071	8.70363	8.58858
G1	ENSG00000198961	PJA2	protein_coding	55.8523	56.1998	40.874	44.456	36.8475	38.3164	29.5069	27.3495	36.4927	37.5772
G1	ENSG00000198975	MIRLET7A2	miRNA	0.839247	0.715856	0.112359	0.182035	0.326235	0.051786	0	0	0	0
G1	ENSG00000199023	MIR339	miRNA	1.93432	1.40581	0.299305	0.848123	1.44086	1.33278	1.01042	1.38068	0.205774	0.267976
G1	ENSG00000199237	RNU6-834P	snRNA	1.8318	0.994049	0.552398	1.17342	1.33711	1.10954	1.02525	1.90861	0.310727	0.265114
G1	ENSG00000199787	RF00406	snoRNA	2.41331	2.91278	1.20915	0.88247	2.2079	1.79096	1.48446	1.02319	1.54212	0.4934
G1	ENSG00000201085	RNU6-173P	snRNA	0.696316	0.57356	0.31547	0.294635	0.272022	0.339398	0.060244	0.298091	0	0.147113
G1	ENSG00000201470	RNY4P7	misc_RNA	1.11274	0.916564	0.153557	0.130877	0.03958	0.404795	0.123908	0.152867	0.226572	0.169939
G1	ENSG00000201581	RN7SKP78	misc_RNA	1.81441	1.18127	0	0.138929	0.151639	0	0.037977	0	0.109683	0.002924
G1	ENSG00000202078	RF00019	misc_RNA	2.85681	2.898	0.878986	0.077591	0.51936	1.13801	0.779458	1.13392	0.569895	0.762259
G1	ENSG00000202111	VTRNA1-2	misc_RNA	3.01165	2.61867	0	0.156404	1.03239	0.792269	0.528493	0.837849	0.734048	0.888982
G1	ENSG00000202314	SNORD6	snoRNA	7.48196	4.92145	2.79636	3.39023	6.86449	5.96803	5.94448	7.6354	0.80342	1.15099
G1	ENSG00000202358	RNU6-652P	snRNA	0.974904	1.25677	0.213377	0.370851	0.866468	1.18401	0.289381	0.497175	0.048642	0.249638
G1	ENSG00000202515	VTRNA1-3	misc_RNA	3.15606	3.95551	0.147455	0.382886	0.489805	0.458976	0.150998	0.564749	0.803001	0.563212
G1	ENSG00000203335	AC006019.1	antisense	0.364483	0.219949	0.016231	0.032716	0.108557	0.226299	0.186385	0.252621	0.009435	0.010267
G1	ENSG00000203435	E2F3P2	processed_pseudogene	0.207177	0.216967	0.021366	0.094966	0.027935	0.016723	0.022797	0.038636	0	0.03531
G1	ENSG00000203688	LINC02487	lincRNA	0.508123	0.492557	0.071082	0.136302	0.238813	0.267087	0.171242	0.272435	0.099921	0.13539
G1	ENSG00000203756	TMEM244	protein_coding	1.42741	1.32441	0.976034	1.60027	1.22999	0.997322	1.19901	1.49902	0.76432	0.578906
G1	ENSG00000203877	RIPPLY2	protein_coding	4.54886	4.06705	2.33111	2.7653	1.35785	2.15761	0.731384	0.538685	1.32364	0.811336
G1	ENSG00000204086	RPA4	protein_coding	1.52508	1.06586	0.473464	0.651233	0.736388	0.580382	0.650726	0.825776	0.740363	0.395493
G1	ENSG00000204186	ZDBF2	protein_coding	3.03769	5.50457	3.03719	2.88273	3.95669	2.44646	1.72969	1.84811	1.47851	2.17926
G1	ENSG00000204256	BRD2	protein_coding	148.848	149.654	73.4571	70.2911	100.169	102.821	113.601	113.57	93.7071	93.7806
G1	ENSG00000204421	LY6G6C	protein_coding	1.27721	1.63142	0.328166	0.212151	0.507626	0.261574	0.540716	0.569106	0.64466	0.915495
G1	ENSG00000204438	GPANK1	protein_coding	31.8511	30.9096	22.8222	22.984	20.3867	21.2915	17.8429	22.4907	15.6164	17.3439
G1	ENSG00000204460	LINC01854	lincRNA	0.745555	0.648032	0.423888	0.536129	0.680532	0.599549	0.409697	0.546218	0.387355	0.342471
G1	ENSG00000204514	ZNF814	protein_coding	8.0169	8.36588	6.78419	5.41272	4.74195	4.79467	7.65114	7.7511	3.72022	3.35709
G1	ENSG00000204519	ZNF551	protein_coding	15.543	14.5045	1.43276	8.40944	8.66417	9.85311	9.26715	2.29287	3.92834	4.33728
G1	ENSG00000204524	ZNF805	protein_coding	6.38684	6.18079	3.85206	3.97847	4.67032	4.49164	5.54051	5.28086	1.60499	1.55816
G1	ENSG00000204611	ZNF616	protein_coding	9.52772	10.9114	5.7447	5.51974	5.51312	4.56386	6.62821	6.11496	5.67199	6.10964
G1	ENSG00000204625	HCG9	lincRNA	0.579409	0.506646	0.398013	0.297135	0.296502	0.499815	0.243757	0.40309	0.192418	0.133477
G1	ENSG00000204876	AC021218.1	lincRNA	0.489852	0.422625	0.067804	0.112367	0.382011	0.38823	0.323663	0.323541	0.068366	0.158959
G1	ENSG00000204915	AC234772.1	processed_pseudogene	0.361086	0.552813	0.148284	0.171229	0.607756	0.430206	0.458278	0.236806	0.004974	0.034551
G1	ENSG00000204946	ZNF783	protein_coding	4.71534	4.92391	5.72379	5.29636	7.48379	7.46883	7.48388	7.92327	4.27343	4.23297
G1	ENSG00000204993	AC139712.1	processed_pseudogene	0.263408	0.18343	0.037681	0.064888	0.043201	0.039772	0.072497	0.08654	0.00812	0.013299
G1	ENSG00000205485	AC004980.1	transcribed_unprocessed_pseudogene	1.51187	1.37694	1.02266	0.516963	0.996831	1.67701	1.05205	1.17373	0.504338	0.756968
G1	ENSG00000205534	SMG1P2	unprocessed_pseudogene	6.25179	5.16947	4.14524	4.27152	5.9298	5.95823	4.26922	5.98564	7.12689	6.97967
G1	ENSG00000205649	HTN3	protein_coding	0.918933	0.576968	0.059236	0.028357	0.144755	0.034704	0.086359	0.055181	0	0.089079
G1	ENSG00000205830	AC024132.1	lincRNA	0.035641	0.082619	0	0	0.066965	0.054061	0.021606	0.024602	0	0
G1	ENSG00000205927	OLIG2	protein_coding	8.80994	8.98068	3.21128	3.64195	3.77194	3.75815	3.51643	3.68383	4.73722	4.69879
G1	ENSG00000206337	HCP5	sense_overlapping	0.274554	0.92691	0.079095	0.088623	0.341199	0.267336	0.301288	0.302325	0.299594	0.212898
G1	ENSG00000206448	PPIAP30	processed_pseudogene	0.659906	0.509232	0.10686	0.187789	0.223668	0.047575	0.090803	0.216665	0	0
G1	ENSG00000206573	THUMPD3-AS1	antisense	34.4925	31.9294	28.096	29.0052	27.498	27.7442	24.1584	23.3492	13.0967	12.6002
G1	ENSG00000206603	SNORA22B	snoRNA	1.33405	1.85232	0.454647	1.26873	1.3454	1.1474	1.71604	1.78721	0.768373	0.308715
G1	ENSG00000206633	SNORA80B	snoRNA	3.74059	2.59857	0.915396	2.03908	1.93387	1.66751	1.37139	1.76696	1.66559	1.78817
G1	ENSG00000206634	SNORA22	snoRNA	2.17281	2.77815	1.65688	1.47861	2.26692	1.76969	2.53028	2.68727	0.999427	1.38905
G1	ENSG00000206885	SNORA75	snoRNA	4.92836	4.11611	1.91781	0.775899	3.81783	2.545	4.11529	4.28273	2.57994	1.05878
G1	ENSG00000206897	SNORA9B	snoRNA	3.59456	2.80568	1.99104	2.77081	3.49139	3.8289	3.42525	3.86949	0.581152	1.5622
G1	ENSG00000206921	RNU6-481P	snRNA	0.355243	1.05793	0.231859	0.413933	0.558814	1.1755	0.355574	0.436314	0.077682	0.202238
G1	ENSG00000207280	SNORD20	snoRNA	2.03966	3.36386	1.19999	1.33099	1.84068	2.97977	1.59586	2.62549	0.22819	0.938275
G1	ENSG00000207445	SNORD15B	snoRNA	4.92034	6.5953	3.38493	3.46823	3.45709	3.51862	4.29883	3.62169	1.39135	2.60709
G1	ENSG00000207523	SNORA66	snoRNA	3.84147	5.77916	2.67499	2.1476	2.52939	2.53869	3.37336	2.54679	1.27445	1.28383
G1	ENSG00000207721	MIR186	miRNA	3.28621	2.87245	1.70577	1.41891	2.33081	1.76121	2.73781	3.20274	0.31163	0.385296
G1	ENSG00000207725	MIR222	miRNA	1.16555	1.11009	0.395504	0.356628	0.428013	0.71333	0.161794	0.405237	0.040959	0.155226
G1	ENSG00000207870	MIR221	miRNA	29.769	30.2499	11.5252	7.19583	15.4794	16.4284	10.9607	15.449	2.77677	3.92216
G1	ENSG00000207971	MIR125B1	miRNA	0.005344	0.105828	0.010214	0.011299	0.001963	0.009416	0.010318	0	0	0
G1	ENSG00000207973	MIR589	miRNA	10.4506	7.48497	2.97899	3.80093	6.30523	5.36902	4.13107	7.79344	2.03228	2.79715
G1	ENSG00000208037	MIR320A	miRNA	1.87905	1.01431	0.103041	0.418878	0.165972	0.396101	0.197109	0.30648	0.250097	0.680357
G1	ENSG00000211459	MT-RNR1	Mt_rRNA	4246.39	4351.34	2955.42	2898.11	3700.78	2984.21	3097.02	3063.58	2847.36	2825.35
G1	ENSG00000212493	SNORD19	snoRNA	4.08348	4.34472	2.54989	2.86189	4.54081	4.91298	4.81789	3.94937	0.34614	0.821674
G1	ENSG00000212724	KRTAP2-3	protein_coding	141.33	187.764	55.0132	52.3215	170.099	200.186	127.039	128.125	15.8521	17.8391
G1	ENSG00000212916	MAP10	protein_coding	3.36151	3.56373	1.71371	1.85165	2.03196	2.25161	1.42767	1.41042	1.58556	1.37415
G1	ENSG00000213060	AL031864.1	processed_pseudogene	0.322942	0.315438	0.031875	0.057054	0.120368	0.119488	0.229261	0.053991	0.048482	0.144679
G1	ENSG00000213144	AC084880.1	processed_pseudogene	35.2477	36.6717	14.0325	14.4265	23.0336	24.7387	13.3024	17.7687	10.35	8.94226
G1	ENSG00000213232	PPP1R2P10	processed_pseudogene	32.8653	34.6485	22.3676	24.9869	14.9718	16.8243	18.9595	17.5509	18.9063	20.0751
G1	ENSG00000213416	KRTAP4-12	protein_coding	1.56353	2.20589	0	0	0.234006	0.439062	0.075458	0.076306	0	0.023467
G1	ENSG00000213453	FTH1P3	processed_pseudogene	2.91694	3.28143	1.00037	0.567759	0.825738	0.495971	0.599229	1.10398	0.671961	1.25613
G1	ENSG00000213513	IMPDH1P5	processed_pseudogene	2.77177	2.05967	2.13844	1.6161	2.28216	1.9711	2.40392	2.07306	1.09955	1.18385
G1	ENSG00000213638	ADAT3	protein_coding	15.9647	14.7753	3.724	3.02436	3.90752	3.09667	3.85257	4.3186	2.56037	3.48381
G1	ENSG00000213923	CSNK1E	protein_coding	187.434	193.364	153.069	142.996	160.733	174.406	139.894	158.056	124.077	136.031
G1	ENSG00000213997	PGAM1P7	processed_pseudogene	1.90648	2.33955	1.84507	1.77909	1.77165	1.40791	2.13573	2.23003	0.862509	1.18218
G1	ENSG00000214029	ZNF891	protein_coding	2.26668	2.00523	1.48525	1.38983	1.13812	0.966275	1.43097	1.36259	0.526908	0.531432
G1	ENSG00000214093	AL096701.1	processed_pseudogene	0.291545	0.29722	0	0	0.117762	0.314932	0.101135	0	0.025497	0.054935
G1	ENSG00000214331	AC009053.1	transcribed_unprocessed_pseudogene	19.1985	19.6744	14.7741	15.2556	20.3539	17.6662	18.2514	19.6859	12.6987	12.9899
G1	ENSG00000214875	MED28P1	processed_pseudogene	0.240473	0.254346	0.053681	0.117142	0.176524	0.27092	0.34715	0.202395	0	0.07994
G1	ENSG00000215105	TTC3P1	processed_pseudogene	5.91639	6.45307	4.07953	4.36868	3.55273	3.79624	4.00048	3.504	3.92474	4.11695
G1	ENSG00000215120	AL590763.1	processed_pseudogene	0.2039	0.168649	0	0	0.072774	0.166023	0.017573	0.058326	0.038319	0.028187
G1	ENSG00000215154	AC141586.1	transcribed_unprocessed_pseudogene	13.0041	13.2753	7.04259	8.39149	15.6141	16.8617	16.4925	17.5639	9.30739	10.3237
G1	ENSG00000215156	AC138409.1	processed_pseudogene	0.068615	0.097219	0.022484	0.007537	0.037204	0.039702	0.026398	0.007648	0	0.006202
G1	ENSG00000215284	AL512633.1	processed_pseudogene	0.492375	0.365992	0.090162	0.080316	0.065446	0	0.032855	0.020865	0.105434	0.036393
G1	ENSG00000215354	FAM90A24P	transcribed_unprocessed_pseudogene	0.227727	0.232721	0.088011	0.081184	0.287324	0.349439	0.248481	0.240152	0.033361	0.055616
G1	ENSG00000215388	ACTG1P3	processed_pseudogene	0.758757	0.652785	0.461056	0.40156	0.543378	0.424627	0.479609	0.619317	0.183396	0.256851
G1	ENSG00000215417	MIR17HG	processed_transcript	3.5088	4.17436	1.15688	1.08653	2.60732	1.69317	1.75537	2.46851	0.634482	0.578947
G1	ENSG00000215474	SKOR2	protein_coding	0.501627	0.518655	0.130601	0.320819	0.243937	0.259702	0.132117	0.158003	0.113554	0.154103
G1	ENSG00000215840	AL592295.1	processed_pseudogene	0.29145	0.194685	0.07635	0.035834	0.102685	0.067187	0.13534	0.034447	0.046601	0.019507
G1	ENSG00000215861	AC245297.1	unprocessed_pseudogene	0.734812	0.63505	0.17617	0.314016	0.515726	0.680532	0.496439	0.470919	0.244124	0.202002
G1	ENSG00000215875	ST13P20	transcribed_processed_pseudogene	1.12422	1.35279	0.466202	0.430148	0.974044	0.887149	0.617145	0.591501	0.621714	0.357525
G1	ENSG00000217128	FNIP1	protein_coding	42.29	41.2783	18.5401	17.1477	14.3969	14.6775	21.7374	20.5124	13.811	13.9653
G1	ENSG00000217159	LARP1P1	processed_pseudogene	1.2282	1.0533	0.034477	0.046433	0.206197	0.398398	0.320609	0.272334	0.33467	0.137505
G1	ENSG00000217275	AL031777.1	processed_pseudogene	6.83025	4.77627	0.796376	0.822563	2.14046	2.34708	1.55602	1.69306	0.411759	0.802774
G1	ENSG00000217801	AL390719.1	transcribed_unprocessed_pseudogene	7.40268	7.81861	3.86366	3.76151	6.77996	7.35587	3.36483	3.33704	2.91465	2.59073
G1	ENSG00000218109	KIRREL3-AS3	antisense	0.385237	0.368635	0.107686	0.323927	0.425486	0.402818	0.244248	0.303771	0.030006	0.115871
G1	ENSG00000218819	TDRD15	protein_coding	0.341552	0.40922	0.249083	0.343937	0.241676	0.219805	0.139951	0.150451	0.115686	0.067566
G1	ENSG00000219470	AL355802.1	processed_pseudogene	1.21896	1.19408	1.01607	0.764704	0.858732	0.989502	0.968324	0.940964	0.400496	0.389199
G1	ENSG00000221044	RF00012	snoRNA	1.07494	0.67965	0.420355	0.399664	0.929091	0.54873	0.399711	0.874939	0.210578	0.153313
G1	ENSG00000221949	LINC01465	lincRNA	0.570221	1.032	0.16782	0.232811	0.680092	0.688108	0.251291	0.193318	0.359056	0.190496
G1	ENSG00000222489	SNORA79B	snoRNA	8.88689	8.19863	4.73123	4.48711	6.97548	9.54936	9.30484	9.37716	2.53043	2.40908
G1	ENSG00000223356	AL590666.1	antisense	4.23378	4.39344	1.04439	0.365942	1.45125	1.30563	1.78188	1.85643	1.23035	1.1551
G1	ENSG00000223390	AL445685.1	antisense	0.334269	0.471162	0.086995	0.085716	0.143103	0.250857	0.17376	0.127454	0.060759	0.037247
G1	ENSG00000223461	AC004471.1	antisense	0.392881	0.361561	0.147409	0.085342	0.15076	0.170232	0.028308	0.14247	0.062768	0.129844
G1	ENSG00000223547	ZNF844	protein_coding	5.80987	4.6022	1.4209	1.395	2.24467	1.83011	1.82449	1.83793	1.09998	1.64893
G1	ENSG00000223599	AL513523.1	processed_pseudogene	1.19146	1.50299	0.250572	0.35921	0.339725	0.22338	0.310353	0.211258	0.198329	0.272573
G1	ENSG00000223692	DIP2A-IT1	sense_intronic	0.568372	0.82002	0.467625	0.218127	0.715304	0.687199	0.875781	0.422489	0.176442	0.371004
G1	ENSG00000223760	MED15P9	transcribed_unprocessed_pseudogene	8.99864	7.55656	6.5577	6.07059	7.27799	5.3463	5.62331	6.39032	1.13938	1.75194
G1	ENSG00000223773	CD99P1	transcribed_unprocessed_pseudogene	9.60717	9.56983	4.06216	4.58083	5.48956	5.60082	8.48216	8.40844	6.63359	3.18283
G1	ENSG00000223959	AFG3L1P	transcribed_unitary_pseudogene	7.61586	6.42916	3.43174	3.99812	4.21957	4.56662	4.66242	8.71435	3.31413	3.21664
G1	ENSG00000224032	EPB41L4A-AS1	lincRNA	13.4424	13.3692	9.55644	8.4269	10.7901	9.36742	14.1487	16.023	5.16185	6.31263
G1	ENSG00000224080	UBE2FP1	processed_pseudogene	4.43992	4.89115	1.40642	1.21389	1.88021	1.87941	1.56518	2.1147	1.81083	2.62135
G1	ENSG00000224083	MTCO1P11	unprocessed_pseudogene	0.259945	0.257504	0.119536	0.069153	0.106408	0.213272	0.089614	0.200488	0.043365	0.05792
G1	ENSG00000224109	CENPVL3	protein_coding	10.3719	10.6436	8.3465	8.22476	7.83475	8.79754	6.36084	6.55886	6.44814	6.90543
G1	ENSG00000224255	PDCL3P6	processed_pseudogene	0.271198	0.126679	0.053729	0.022277	0.016782	0.035091	0.058906	0.080418	0.032569	0
G1	ENSG00000224271	AL117329.1	lincRNA	7.69014	7.88185	4.49199	4.2613	3.83961	3.41659	4.56623	5.73639	3.87209	4.1671
G1	ENSG00000224675	AC009227.1	antisense	0.087432	0.098875	0.045476	0.022655	0.11091	0.13269	0	0.023221	0.009866	0.0107
G1	ENSG00000224679	MED15P4	unprocessed_pseudogene	2.14114	1.73592	1.03669	1.14093	1.31939	1.13172	1.46714	1.41987	0.574778	0.724092
G1	ENSG00000224680	PLA2G12AP1	processed_pseudogene	2.84724	2.61669	2.43392	1.8202	1.75577	2.41717	2.15689	2.6833	0.781877	0.934882
G1	ENSG00000224967	AC009303.1	processed_pseudogene	0.497157	0.417431	0.356061	0.309181	0.479133	0.443536	0.510972	0.691787	0.254088	0.250858
G1	ENSG00000225205	AC078883.1	antisense	4.55025	2.49835	2.97282	1.98241	2.09444	2.28731	1.40231	1.98016	1.41261	1.31923
G1	ENSG00000225206	MIR137HG	lincRNA	2.43369	2.66917	1.56828	1.27744	1.42075	1.67064	1.67193	1.28126	0.707628	1.12809
G1	ENSG00000225213	AC073367.1	sense_intronic	1.00518	0.929587	0.596115	0.462549	0.406595	0.544948	0.436272	0.414791	0.14326	0.083801
G1	ENSG00000225330	AF064860.1	sense_overlapping	0.431917	0.531137	0.365663	0.19241	0.209414	0.199529	0.123185	0.175348	0.417253	0.253743
G1	ENSG00000225448	AC009477.1	processed_pseudogene	2.75161	1.9529	1.35642	0.570454	1.0659	0.817441	0.808369	0.779199	0.146414	0.480784
G1	ENSG00000225450	AL021707.1	antisense	3.18775	0.084675	0.113385	2.40979	2.66986	1.88071	0.270956	0.270758	0	0
G1	ENSG00000225578	NCBP2-AS1	antisense	0.391313	0.419094	0	0.04867	0.237455	0.340445	0.198883	0.28576	0.11433	0.130779
G1	ENSG00000225655	BX255923.1	lincRNA	6.06174	3.87677	4.20164	3.24352	3.6547	3.64962	2.81581	3.01837	2.86009	2.45207
G1	ENSG00000225813	AC009299.1	processed_pseudogene	6.96403	7.28099	3.57518	2.94214	3.79663	3.68099	6.57875	7.04793	1.99865	1.96884
G1	ENSG00000225973	PIGBOS1	protein_coding	23.8017	22.2185	17.526	14.8269	16.2235	18.0657	15.0723	17.319	16.9651	18.7617
G1	ENSG00000226380	LINC-PINT	lincRNA	1.49958	0.81758	0.977416	0.725926	0.654078	0.943862	0.987869	0.929613	0.413258	0.708461
G1	ENSG00000226396	AL031727.1	processed_pseudogene	1.87407	1.46538	1.50991	1.32247	1.05761	0.81838	1.23472	1.51933	0.649965	0.507547
G1	ENSG00000226581	AC092634.3	lincRNA	0.089744	0.261873	0.230219	0	0.078914	0	0	0	0	0
G1	ENSG00000226652	PSMD10P2	transcribed_processed_pseudogene	0.613286	1.07179	0.190005	0.36466	0.43129	0.405668	0.181563	0.116721	0.152705	0.112957
G1	ENSG00000226763	SRRM5	protein_coding	1.52089	1.56408	1.28646	0.797555	1.76382	1.2715	1.02397	1.07174	0.582035	0.804804
G1	ENSG00000226767	AC114501.1	processed_pseudogene	1.13804	1.30195	0.341404	0.815591	1.03795	0.73975	0.290497	0.522875	0.065487	0.249463
G1	ENSG00000226954	AL023802.1	lincRNA	0.537069	0.641796	0.245859	0.28247	0.363872	0.448815	0.564325	0.730846	0.125134	0.195705
G1	ENSG00000226981	ABHD17AP6	unprocessed_pseudogene	1.12095	1.05404	0.966153	1.14288	1.11061	1.05171	0.853479	0.879827	1.20584	1.0363
G1	ENSG00000227014	AC007285.1	antisense	1.24073	0.983068	1.30826	1.14493	1.29066	1.07589	1.27848	1.43124	0.957714	0.571297
G1	ENSG00000227053	AC105446.1	antisense	7.75559	6.88525	5.59891	5.77628	8.68196	6.56309	5.43605	6.49872	3.23098	3.9384
G1	ENSG00000227210	AC079145.1	antisense	1.13663	1.21478	0.92014	1.14532	0.80265	0.827659	0.611786	0.852608	0.412244	0.575299
G1	ENSG00000227258	SMIM2-AS1	antisense	1.35748	1.22151	1.09901	1.02972	1.133	1.68893	0.525756	0.694781	0.523181	0.589637
G1	ENSG00000227267	AC072039.1	processed_pseudogene	0.565744	0.76787	0.139704	0.339155	0.566414	0.582999	0.810349	0.546533	0.331317	0.186663
G1	ENSG00000227376	FTH1P16	processed_pseudogene	2.61829	2.80554	0.414752	0.524816	0.688009	0.526417	1.19903	0.581726	1.08628	0.980968
G1	ENSG00000227379	PPIAP2	processed_pseudogene	0.51978	0.505521	0.3977	0.148261	0.05736	0.058944	0.055183	0.05891	0	0.116485
G1	ENSG00000227698	AP001619.1	sense_intronic	0.371119	0.208309	0.183387	0.132573	0.195934	0.056357	0.051182	0.30472	0.092337	0.089824
G1	ENSG00000227777	AL031736.1	processed_pseudogene	0.373224	0.344775	0.136867	0.252301	0.54125	0.303812	0.159376	0.359312	0.113631	0.101763
G1	ENSG00000227910	AC092634.4	transcribed_processed_pseudogene	1.76225	1.37116	1.05056	1.18371	0.671374	0.688321	0.528534	0.657607	0.143249	0.243867
G1	ENSG00000227963	RBM15-AS1	antisense	0.828472	0.791499	0.172086	0.199629	0.307893	0.333954	0.479854	0.524941	0.362554	0.32476
G1	ENSG00000228005	AC020743.1	antisense	0.410157	0.541465	0	0	0.140782	0.241984	0	0.071391	0	0
G1	ENSG00000228124	AL096678.1	antisense	0.612706	0.727989	0.268324	0.336854	0.343059	0.590888	0.333585	0.355027	0.601704	0.207025
G1	ENSG00000228158	TLE1P1	processed_pseudogene	1.17986	1.59257	0.645388	0.452656	0.473449	0.680306	0.224167	0.490368	0.257312	0.753301
G1	ENSG00000228184	SNX19P1	processed_pseudogene	0.173809	0.081818	0.017971	0.018193	0.006953	0.006921	0	0.035937	0.020795	0.013299
G1	ENSG00000228192	AL512353.1	antisense	16.6833	17.7077	13.0758	11.9699	14.5374	14.7845	9.38812	11.4789	7.04503	8.70657
G1	ENSG00000228201	AL022341.1	antisense	1.39823	0.771874	0.71272	0.641943	0.909027	0.565887	0.866712	1.06288	0.49897	0.596185
G1	ENSG00000228294	BMS1P17	transcribed_unprocessed_pseudogene	0.377191	0.508623	0.05576	0.057037	0.212483	0.418345	0.149601	0.160928	0	0
G1	ENSG00000228412	AL022068.1	antisense	1.36235	1.59802	1.29538	1.78726	1.1843	1.91734	1.16512	0.938492	0.287824	0.485694
G1	ENSG00000228485	GRK5-IT1	sense_intronic	1.65975	1.14343	0.332509	0.367634	0.31761	0.78342	0.544721	0.500143	0.204808	0.05927
G1	ENSG00000228527	AC016396.1	lincRNA	0.708928	0.542254	0.386389	0.057593	0.17891	0.26221	0.210472	0.213628	0	0.161048
G1	ENSG00000228606	AL139011.1	antisense	0.805114	0.845003	0.521654	0.319946	0.813033	0.21636	0.515218	0.531969	0.211288	0.255257
G1	ENSG00000228615	AC093166.2	processed_pseudogene	0.140497	0.138849	0.008043	0	0.11835	0.038673	0.004375	0.026744	0	0
G1	ENSG00000228672	PROB1	protein_coding	1.40153	1.45102	0.701847	0.721031	0.758444	0.55912	0.598548	0.60055	0.530129	0.588124
G1	ENSG00000228709	LINC02575	lincRNA	43.621	41.2234	30.0199	29.9803	25.5573	27.6983	34.1021	39.0691	15.3248	17.4078
G1	ENSG00000228817	BACH1-IT2	lincRNA	0.924993	0.5625	0.796683	0.673854	0.889781	0.809397	0.662815	0.992336	0.317785	0.626815
G1	ENSG00000229107	ABHD17AP4	processed_pseudogene	3.1843	2.30714	1.97865	1.62895	2.82455	2.34304	1.95629	2.57271	1.4379	1.44721
G1	ENSG00000229124	VIM-AS1	antisense	30.4472	26.5899	18.8121	21.5291	20.2313	16.1538	18.7341	20.3118	17.3235	15.2415
G1	ENSG00000229222	KRT18P4	processed_pseudogene	0.428375	0.567216	0.345173	0.37798	0.471071	0.249345	0.39973	0.51849	0.295528	0.233046
G1	ENSG00000229419	RALGAPA1P1	processed_pseudogene	0.952772	0.744286	0.381357	0.320563	0.384052	0.373206	0.441855	0.428563	0.381141	0.460598
G1	ENSG00000229473	RGS17P1	processed_pseudogene	1.90661	1.95917	0.268434	0.358126	0.117762	0.222352	0.059506	0.176025	0.161794	0.134972
G1	ENSG00000229587	AL158825.2	sense_intronic	0.429929	0.37312	0.154752	0.114573	0.28695	0.271894	0.16108	0.177717	0.071338	0.098289
G1	ENSG00000229808	AL391825.1	transcribed_processed_pseudogene	4.02716	1.20465	0.389138	0.34576	0.645497	0.714409	1.00853	0.761484	0.444307	0.427031
G1	ENSG00000230002	ALMS1-IT1	sense_intronic	12.9778	11.2156	4.02055	3.82762	5.48136	6.16954	4.9706	5.54648	2.93803	3.05321
G1	ENSG00000230071	RPL4P6	processed_pseudogene	2.35317	2.06142	0.71818	0.397004	0.453162	0.548209	0.530096	0.597628	0.492983	0.806959
G1	ENSG00000230149	AL021707.3	antisense	3.74698	3.51249	2.79316	2.28514	1.99629	2.10746	0.602234	0.955817	0.668198	0.888002
G1	ENSG00000230176	LINC01433	antisense	0.272603	0.239934	0	0.021147	0.229589	0.170733	0.157774	0.229812	0.011107	0.01493
G1	ENSG00000230450	NEK2P4	processed_pseudogene	11.4838	9.65292	1.42897	1.58124	2.86802	2.17858	2.86487	2.4878	0.975385	1.19463
G1	ENSG00000230532	AC091133.1	antisense	1.06743	1.80113	0.567346	0.628912	0.679125	0.536687	0.82197	0.946132	0.427033	0.536354
G1	ENSG00000230581	ACTG1P14	processed_pseudogene	0.543933	0.418802	0.034529	0.00435	0.013792	0.022155	0.048234	0.042018	0.020701	0
G1	ENSG00000230797	YY2	protein_coding	2.5277	2.77237	1.52775	1.65235	2.03545	2.11101	2.17002	2.924	1.74767	1.68879
G1	ENSG00000230844	ZNF674-AS1	lincRNA	24.7846	25.5517	20.3947	19.4938	15.5993	15.4473	14.3363	15.6628	11.0233	11.6033
G1	ENSG00000230898	AL596087.2	sense_intronic	0.606543	0.51056	0.17915	0.131622	0.167067	0.108599	0.181059	0.078137	0.115225	0.315731
G1	ENSG00000230914	AC004840.1	transcribed_unitary_pseudogene	1.66895	1.55202	0.934004	0.683881	1.23361	0.943671	0.89222	1.18281	0.688877	0.503408
G1	ENSG00000230922	AL079301.1	sense_intronic	5.77356	5.93607	0.155684	0.163626	0.277292	0.239405	0.200017	0.256052	0.526576	0.420382
G1	ENSG00000230955	AL929472.2	antisense	0.69134	0.424844	0.189718	0.040099	0.129725	0.276796	0	0.152077	0.180693	0
G1	ENSG00000230987	AL359976.1	processed_pseudogene	1.38206	1.15434	0.907484	0.754937	0.528369	0.524954	0.392295	0.410011	0.143627	0.139636
G1	ENSG00000231023	LINC00326	lincRNA	0.214863	0.166718	0.023625	0.052909	0.051842	0.045066	0.053145	0.140803	0.030856	0.01384
G1	ENSG00000231154	MORF4L2-AS1	antisense	0.650452	0.814606	0.282576	0.29672	0.373393	0.370073	0.395032	0.369921	0.176695	0.204678
G1	ENSG00000231177	LINC00852	antisense	0.848285	1.25945	0.246089	0.033352	0.666589	0.558338	0.237241	0.04867	0.135709	0.114
G1	ENSG00000231233	CFAP58-DT	antisense	2.65611	2.17471	1.84376	1.66783	1.8467	1.65736	0.605352	0.805984	0.862413	0.564273
G1	ENSG00000231290	APCDD1L-DT	processed_transcript	80.3023	77.8022	60.706	63.0196	85.3256	81.2378	41.0742	44.7771	69.8329	54.5519
G1	ENSG00000231565	NEK2P2	processed_pseudogene	11.6122	10.3821	5.94816	4.11702	5.59578	5.12153	6.29259	7.17452	2.30818	2.4376
G1	ENSG00000231681	AC020743.2	lincRNA	0.228134	0.111773	0	0	0.016887	0	0	0	0	0.032632
G1	ENSG00000231701	BMS1P13	unprocessed_pseudogene	0.237287	0.285349	0.167852	0.196059	0.372998	0.350001	0.211859	0.329393	0.198079	0.186459
G1	ENSG00000231714	AL513348.1	lincRNA	0.287728	0.033481	0	0	0.072982	0.223469	0	0.093388	0	0.037797
G1	ENSG00000231721	LINC-PINT	processed_transcript	3.6943	3.43645	1.19186	1.24714	1.39901	2.36921	0.940559	0.947726	1.3199	0.938898
G1	ENSG00000231806	PCAT7	antisense	5.09112	6.97259	4.02472	4.32339	4.71978	4.68555	4.85259	5.50622	3.42004	3.90676
G1	ENSG00000231940	RPS7P3	processed_pseudogene	4.78266	3.80015	2.98968	2.53371	1.41776	1.07258	1.50107	2.42853	0.526293	0.464765
G1	ENSG00000232034	AC092168.2	sense_intronic	0.474174	0.477686	0.56377	0.273016	0.36036	0.300692	0.210118	0.264779	0.086891	0.19673
G1	ENSG00000232040	ZBED9	protein_coding	6.62191	5.78414	3.24593	3.76803	4.73203	4.65625	3.45855	3.81417	2.84627	2.95508
G1	ENSG00000232044	LINC01105	processed_transcript	0.156751	0.250991	0.154573	0.057256	0.200069	0.228168	0.161353	0.061889	0.003689	0.011426
G1	ENSG00000232202	AC098824.1	processed_pseudogene	0.123064	0.254296	0.081847	0.046944	0.120718	0.085717	0.027881	0	0	0
G1	ENSG00000232301	LNCPRESS1	lincRNA	0.286374	0.221311	0	0	0.011913	0.024465	0	0	0.069528	0.085017
G1	ENSG00000232303	DFFBP1	processed_pseudogene	7.31881	7.59088	5.7986	3.92017	3.18303	3.70727	3.45941	3.75032	1.75042	2.59278
G1	ENSG00000232445	AC006329.1	antisense	4.80656	4.20831	1.15311	1.29135	2.66516	2.74006	2.10238	3.06983	1.92111	2.07163
G1	ENSG00000232486	AL592437.2	processed_pseudogene	0.264845	0.229452	0.080433	0.072506	0.069894	0.020391	0.043973	0.146779	0.063772	0.06013
G1	ENSG00000232487	RASA3-IT1	sense_intronic	1.27095	1.00598	0.090124	0.077283	0.178268	0.076848	0.022462	0.08795	0.46106	0.708094
G1	ENSG00000232519	AL353807.2	antisense	0.952249	0.651039	0.377772	0.426178	0.256183	0.568517	0.232623	0.601857	0.14193	0.216914
G1	ENSG00000232611	AL683813.1	lincRNA	0.340264	0.329532	0.162893	0.205623	0.400767	0.22637	0.333434	0.352711	0.145306	0.109076
G1	ENSG00000232623	AP000266.1	antisense	0.774171	0.527934	0.144407	0.287229	0.572773	0.718812	0.695486	0.602739	0.305628	0.366562
G1	ENSG00000232638	AL390294.1	lincRNA	0.690663	1.60786	0.121482	0.043621	0.294267	0.295155	0.396457	0.692465	0.16202	0.088314
G1	ENSG00000232679	LINC01705	lincRNA	1.11926	1.31367	0.132424	0.085136	0.432173	0.541229	1.07816	0.690654	0.041329	0
G1	ENSG00000232810	TNF	protein_coding	0.755886	0.717685	0.113685	0.1502	0.13514	0.399012	0.056779	0.115909	0.027671	0.070485
G1	ENSG00000232891	AL450344.3	sense_intronic	0.332694	0.290397	0.083229	0	0	0.098421	0.126937	0.036397	0.030415	0.11869
G1	ENSG00000232956	SNHG15	lincRNA	42.4688	42.6869	22.3342	22.1043	45.5571	54.1035	34.7778	40.9796	23.0777	26.4058
G1	ENSG00000233028	AC006970.2	processed_pseudogene	0.865124	0.905476	0.643519	0.351463	0.543013	0.493849	0.197342	0.410092	0.127841	0.012045
G1	ENSG00000233117	LINC00702	lincRNA	49.6267	49.9132	31.9091	32.867	31.7276	37.4894	18.9861	20.3525	11.3589	12.4585
G1	ENSG00000233221	AC133785.1	antisense	0.465898	0.34068	0.118428	0.158781	0.256498	0.06764	0.122262	0.159468	0.114294	0.074389
G1	ENSG00000233230	AC079807.1	antisense	3.05379	2.31633	2.23354	2.63097	1.3961	1.20448	1.47472	0.820735	0.97882	1.42871
G1	ENSG00000233242	AL512604.2	antisense	0.145845	0.152553	0.046735	0.071883	0.225104	0	0.071425	0.102284	0	0.016145
G1	ENSG00000233325	MIPEPP3	transcribed_unprocessed_pseudogene	2.64732	2.30187	1.44929	2.03942	1.4935	1.81196	0.869249	0.875374	0.540039	1.84054
G1	ENSG00000233384	AC096537.1	bidirectional_promoter_lncRNA	0.808711	0.623558	0.758446	0.631229	0.394916	0.671584	0.382461	0.330273	0.407488	0.245802
G1	ENSG00000233397	AC008063.2	lincRNA	0.511874	0.498445	0.333472	0.167222	0.512541	0.592266	0.293921	0.374028	0.025552	0
G1	ENSG00000233491	AC008163.1	transcribed_unitary_pseudogene	0.062009	0.049767	0	0	0.05307	0.042069	0.037598	0.017362	0	0
G1	ENSG00000233542	AL391845.2	antisense	0.282248	0.302684	0.095776	0.097005	0.248639	0.199003	0.138528	0.098292	0.124869	0
G1	ENSG00000233614	DDX11L10	transcribed_unprocessed_pseudogene	0.638454	0.939886	0.611926	0.614285	0.408697	0.397382	0.383195	0.398619	0.458759	0.567873
G1	ENSG00000233671	AC083899.2	processed_pseudogene	3.1185	3.81449	0.134504	0.117388	1.95146	1.17877	0.439034	0.437138	0.006662	0.046073
G1	ENSG00000233757	AC092835.1	protein_coding	7.13995	6.55046	3.81573	4.95779	4.34303	4.96578	4.3787	4.59362	2.53933	2.5641
G1	ENSG00000234219	CDCA4P4	unprocessed_pseudogene	0.353371	0.497754	0.228816	0.119367	0.094433	0.188136	0.200033	0.152687	0.034043	0.141835
G1	ENSG00000234231	AC093616.1	transcribed_unprocessed_pseudogene	8.56951	0.4127	0.173356	0.226484	6.06889	5.87612	6.94951	0.336641	10.5488	14.0981
G1	ENSG00000234290	AC116366.1	antisense	0.349423	0.273348	0	0.014419	0.034179	0.043939	0.049066	0.028696	0.091718	0.127564
G1	ENSG00000234492	RPL34-AS1	lincRNA	0.840529	1.30167	0.186361	0.18865	0.177017	0.306445	0.097005	0.146198	0.115773	0.063904
G1	ENSG00000234685	NUS1P2	processed_pseudogene	1.72879	1.2082	1.10912	1.1967	0.957812	1.0948	0.596407	0.298905	0.616559	0.476385
G1	ENSG00000234737	KRT18P15	processed_pseudogene	1.1926	0.877329	0.340054	0.207245	0.185029	0.116724	0.249784	0.134395	0.114808	0.160579
G1	ENSG00000234776	C11orf94	protein_coding	1.10023	1.01632	0.438298	0.461618	0.635546	0.379544	0.684067	0.49328	0.63198	0.70086
G1	ENSG00000234832	AL096677.1	antisense	0.394863	0.539763	0.168116	0.123828	0.530513	0.528752	0.267389	0.605759	0.073123	0
G1	ENSG00000234912	SNHG20	sense_overlapping	14.9177	9.98935	7.18759	5.93015	5.45631	5.14197	8.18068	6.16255	5.01251	3.9608
G1	ENSG00000234981	AC244034.1	processed_pseudogene	0.286676	0.299743	0.101804	0.033782	0.17232	0.031176	0.075478	0.034627	0.026286	0.059661
G1	ENSG00000234999	SNRPCP19	processed_pseudogene	0.605178	0.430212	0.076404	0.029082	0.311333	0.284598	0	0.350531	0.070927	0.07038
G1	ENSG00000235026	DPP10-AS1	antisense	6.53195	6.79877	5.25089	5.70668	4.40355	4.10293	2.22566	3.18458	4.00859	5.06671
G1	ENSG00000235244	DANT2	lincRNA	0.208778	0.271008	0.284146	0.260498	0.211264	0.125223	0.151179	0.196341	0.04004	0.072912
G1	ENSG00000235272	RAMACL	protein_coding	2.96067	2.7506	2.07743	2.19371	2.21434	2.25966	1.83965	2.69093	2.48679	2.4884
G1	ENSG00000235529	AGAP1-IT1	sense_intronic	1.58056	1.14834	0.516581	0.384981	0.291166	0.290626	0.338596	0.327513	0.225616	0.737212
G1	ENSG00000235618	FAM21EP	transcribed_unprocessed_pseudogene	0.805349	0.756192	0.506307	0.313744	0.425249	0.39692	0.183984	0.274821	0.155644	0.175298
G1	ENSG00000235631	RNF148	protein_coding	0.22959	0.24573	0.082305	0.051849	0.05833	0.075995	0.080868	0.063233	0.115748	0.029106
G1	ENSG00000235651	AC064850.1	processed_pseudogene	2.23089	1.97779	0.980144	0.953875	0.675728	0.594229	0.490193	0.876328	0.422859	0.542849
G1	ENSG00000236013	AL357146.1	lincRNA	0.070601	0.076481	0.040453	0	0.114635	0.241095	0.051098	0.057334	0	0.018989
G1	ENSG00000236120	AC110995.1	lincRNA	1.35669	1.31075	0.330005	0.298297	1.50318	1.44446	1.81504	1.61233	0.325769	0.333873
G1	ENSG00000236184	TCEA1P4	processed_pseudogene	3.20772	2.84302	2.32297	2.16638	2.04951	1.94983	2.60027	2.75432	1.41047	1.32883
G1	ENSG00000236255	AC009404.1	lincRNA	6.26489	6.26305	3.74501	3.12389	4.72628	4.78781	5.09429	5.55025	3.87413	4.17676
G1	ENSG00000236296	GUSBP5	transcribed_processed_pseudogene	6.99215	7.01538	3.72148	3.91121	4.13096	4.93787	2.85313	3.5002	3.54971	3.29772
G1	ENSG00000236519	LINC01424	antisense	0.737917	0.441562	0.486098	0.459752	0.607486	0.578713	0.459935	0.392827	0.170399	0.187463
G1	ENSG00000236581	STARD13-AS	processed_transcript	0.152619	0.123552	0	0.147903	0.111157	0.278817	0.146449	0.027807	0.06103	0
G1	ENSG00000236643	AL354928.1	antisense	0.762265	0.622894	0.303428	0.409627	0.261799	0.246342	0.196816	0.472092	0.316638	0.373391
G1	ENSG00000236956	NF1P8	unprocessed_pseudogene	4.55334	5.09352	1.94884	1.74046	2.48835	2.25196	2.2592	2.49518	1.27057	1.30624
G1	ENSG00000237013	LINC01812	lincRNA	0.752167	1.14057	0.118527	0.09974	0.290157	0.369031	0.546946	0.84332	0.124398	0.078466
G1	ENSG00000237149	ZNF503-AS2	antisense	2.45324	2.46771	1.26955	1.21488	2.40007	2.53228	1.15489	1.14048	0.785035	1.34547
G1	ENSG00000237268	AC092447.7	transcribed_unprocessed_pseudogene	11.4419	8.92934	1.42462	1.87809	3.03492	2.9587	3.74771	3.66059	2.2586	2.83139
G1	ENSG00000237330	RNF223	protein_coding	0.097287	0.031531	0	0	0.016272	0.013069	0.014227	0.096398	0.012253	0
G1	ENSG00000237436	CAMTA1-DT	antisense	0.824926	0.705728	0.464894	0.375744	0.611582	0.529588	0.338113	0.307847	0.261724	0.19561
G1	ENSG00000237499	AL357060.1	antisense	1.95795	2.89064	0.789345	0.803631	2.17148	2.8862	0.97543	1.3569	0.348026	0.580471
G1	ENSG00000237531	AL672277.1	lincRNA	0.289839	0.247161	0.228081	0	0.157124	0	0.140487	0	0	0
G1	ENSG00000237605	AL591846.2	antisense	0.882011	1.17173	0.433532	1.15259	0.833941	0.297509	0.193273	0.56928	0.502544	0.337049
G1	ENSG00000237788	AL162615.1	processed_pseudogene	0.524195	0.490107	0.187199	0.110185	0.16669	0.155826	0.159797	0.14163	0.238689	0.151331
G1	ENSG00000237863	AL035425.1	antisense	0.532979	0.674207	0.088971	0.047253	0.133341	0.275966	0.2706	0.153505	0.075644	0
G1	ENSG00000237870	AC073130.1	processed_transcript	1.44113	1.84816	1.2282	1.22593	1.44048	1.48115	1.35847	1.26161	0.994497	0.87469
G1	ENSG00000237892	KLF7-IT1	sense_intronic	1.18915	0.84067	0.21539	0.304624	0.135485	0.328142	0.298574	0.221793	0.185748	0.063997
G1	ENSG00000238062	SPATA3-AS1	lincRNA	2.08139	2.16106	0.830766	0.945959	0.925362	1.16408	1.08797	1.28315	0.768313	0.81053
G1	ENSG00000238129	AL121904.1	lincRNA	5.43737	4.83068	1.85432	1.66878	2.11862	2.47676	1.34534	1.67522	1.21829	1.13602
G1	ENSG00000238286	SLC35E1P1	processed_pseudogene	0.725587	0.953174	0.457135	0.435627	0.398078	0.442675	0.309718	0.24809	0.31693	0.251827
G1	ENSG00000238317	SNORD11	snoRNA	11.0161	8.11336	3.68645	2.80208	5.16122	5.20919	7.27288	8.87721	4.14117	3.05915
G1	ENSG00000238578	SNORD4A	snoRNA	12.1696	14.8334	11.3233	7.26255	11.0992	8.7484	12.1928	14.2689	4.69542	4.75829
G1	ENSG00000238886	SNORD121A	snoRNA	0.471195	0.627578	0.007673	0.234792	0.307512	0	0.390895	0.210285	0.200835	0.123701
G1	ENSG00000239218	RPS20P22	transcribed_processed_pseudogene	1.29777	1.78102	0.725496	1.10267	0.68617	0.872995	0.96917	0.989333	0.615863	0.541508
G1	ENSG00000239389	PCDHA13	protein_coding	0.905799	1.16481	0.622444	0.439698	0.340566	0.254594	0.247566	0.246106	0.170304	0.284031
G1	ENSG00000239474	KLHL41	protein_coding	1.04181	1.23777	0.231437	0.110247	0.310546	0.360552	0.168671	0.237713	0.232351	0.378563
G1	ENSG00000239620	PRR20G	protein_coding	0.185322	0.329213	0.094116	0.03744	0.192979	0.41941	0.169878	0.270338	0.085923	0.054117
G1	ENSG00000240211	AC092849.1	antisense	1.81448	1.98349	0.263129	0.751755	1.54854	1.36127	0.437923	1.27803	0.619402	0.666191
G1	ENSG00000240288	GHRLOS	antisense	1.49106	1.34441	0.442561	0.565356	0.831446	0.423316	0.666737	0.488822	0.415851	0.295889
G1	ENSG00000240441	AC007622.1	processed_pseudogene	0.475074	0.313929	0.136931	0	0.096719	0.172685	0.329266	0.371681	0.02178	0.159105
G1	ENSG00000240476	LINC00973	lincRNA	248.653	236.921	136.643	132.572	154.119	183.169	100.902	112.001	75.1731	77.4598
G1	ENSG00000240498	CDKN2B-AS1	antisense	0.039808	0.061005	0.016843	0.002331	0.040868	0.026963	0.019412	0.026417	0	0.021366
G1	ENSG00000240668	KRT8P36	processed_pseudogene	2.68159	2.46151	0.679024	0.472913	0.874405	1.32722	0.813001	0.529111	0.336405	0.639663
G1	ENSG00000240695	AC117382.1	processed_pseudogene	2.63857	2.69932	0.129782	0.09299	0.2744	0.077637	0.235421	0.243498	0.274759	0.460457
G1	ENSG00000240750	RN7SL559P	misc_RNA	0.487392	1.22182	0.699729	0.211822	0.973935	0.327246	0.792156	0.57163	0.232522	0.030453
G1	ENSG00000240770	C21orf91-OT1	lincRNA	0.35485	0.698017	0.401958	0.424222	0.126918	0.093411	0.044984	0.318541	0.521702	0.580691
G1	ENSG00000240889	NDUFB2-AS1	antisense	0.785825	1.09751	0.801239	0.646963	0.862137	0.669477	0.720803	0.711166	0.473494	0.524132
G1	ENSG00000240964	RN7SL751P	misc_RNA	7.60855	2.25838	0.316188	0.347236	0.721987	0.384238	0.428436	0.218643	0.185451	0.22055
G1	ENSG00000241112	RPL29P14	processed_pseudogene	0.637607	0.29881	0.12538	0.185848	0.125499	0.329362	0.109685	0.102007	0.14411	0.182488
G1	ENSG00000241157	AC104763.1	processed_pseudogene	4.93708	3.88726	1.92059	1.58106	1.11803	1.85555	1.29899	1.7116	1.16285	1.04441
G1	ENSG00000241269	AC093620.1	antisense	1.43949	1.13985	0.233429	0.115152	0.400645	0.311107	0	0	0.284078	0.340147
G1	ENSG00000241280	AC106712.1	lincRNA	13.2508	12.2233	4.55841	5.07467	10.0681	12.1868	12.1691	12.7824	7.41984	6.1835
G1	ENSG00000241313	WWTR1-AS1	antisense	0.933655	0.988122	0.858295	0.773787	1.07987	1.15867	0.76656	0.565259	0.419554	0.559164
G1	ENSG00000241361	SLC25A24P1	transcribed_unprocessed_pseudogene	2.71863	2.56875	2.15373	1.9446	2.25915	2.18632	1.82454	1.76938	1.85797	1.90561
G1	ENSG00000241547	ACTG1P20	processed_pseudogene	4.35641	4.36015	2.2032	2.62535	1.81385	1.99761	2.10069	2.50467	1.09883	1.59161
G1	ENSG00000241684	ADAMTS9-AS2	antisense	0.186996	0.302967	0.127731	0.056973	0.193078	0.134089	0.061941	0.122436	0.062093	0.035007
G1	ENSG00000241749	RPSAP52	transcribed_processed_pseudogene	1.56838	1.59945	0.104473	0.067907	0.854309	0.879147	0.910906	0.682931	0.420564	0.380173
G1	ENSG00000241764	AC002467.1	antisense	10.3888	9.14973	3.88844	2.95338	5.64243	5.88994	4.95974	6.90329	4.58908	3.50326
G1	ENSG00000242020	RN7SL68P	misc_RNA	0.876516	1.19829	0.177165	0	0.090256	0.221043	0.05126	0.128112	0	0.134701
G1	ENSG00000242419	PCDHGC4	protein_coding	0.277884	0.306651	7.16903	0.063981	0.095589	0.126526	0.068273	0.114897	0.057434	0.024575
G1	ENSG00000242474	AC093627.5	lincRNA	12.4979	12.9424	5.54721	5.09347	4.46654	4.87449	4.18236	4.59285	4.80361	4.10202
G1	ENSG00000242599	CSAG4	transcribed_unprocessed_pseudogene	3.05079	2.58119	1.11754	0.796106	1.10884	1.01666	1.14876	1.29725	0.708304	1.14786
G1	ENSG00000242615	AC022415.1	transcribed_processed_pseudogene	1.67248	1.23298	1.29684	0.883097	2.05337	1.35357	1.79006	1.47963	0.442406	0.92778
G1	ENSG00000242616	GNG10	protein_coding	54.1636	52.1535	47.276	46.8194	43.9418	48.4322	38.242	36.4053	56.528	57.8331
G1	ENSG00000242689	CNTF	protein_coding	4.59291	3.86258	1.53283	1.51538	2.079	1.97138	1.87229	1.55286	1.17127	1.45116
G1	ENSG00000242853	RN7SL749P	misc_RNA	1.95501	2.27865	0.611233	0.663896	0.359599	0.452289	0.549514	0.333356	0.24751	0.287691
G1	ENSG00000243008	AL359538.1	processed_transcript	0.20234	0.130055	0.298654	0.295716	0.307754	0.306993	0.234849	0.191806	0.042466	0.133541
G1	ENSG00000243678	NME2	protein_coding	1064.28	967.762	982.906	956.828	921.004	1003.68	697.449	847.801	1097.21	1099.74
G1	ENSG00000243819	RN7SL832P	lincRNA	1.60026	1.57419	1.37089	1.18728	1.62118	1.38352	1.1106	1.05173	0.447687	0.53357
G1	ENSG00000243854	RN7SL67P	misc_RNA	2.13435	2.10444	0.427268	0.39179	0.772071	0.250253	0.863854	0.89861	0.092378	0.379525
G1	ENSG00000243960	AL390195.1	sense_overlapping	3.68058	3.89068	1.60693	1.64037	1.79698	2.53238	2.1465	3.71691	1.6516	1.61411
G1	ENSG00000244346	AC092953.1	processed_pseudogene	0.179184	0.101719	0.011257	0.076772	0.069053	0.016022	0.062704	0.061234	0.04864	0
G1	ENSG00000244485	RPL18P13	processed_pseudogene	10.127	6.60225	3.25758	2.99699	2.4164	2.78556	0.842808	1.73914	1.29492	2.23728
G1	ENSG00000245904	AC025164.1	antisense	0.244704	0.390246	0.077174	0.09667	0.152104	0.098105	0.001924	0.14924	0.101715	0.024189
G1	ENSG00000246130	AC107959.2	antisense	0.223856	0.207636	0.06496	0	0.093762	0.081833	0.072613	0.027175	0.031563	0.047908
G1	ENSG00000246250	AC087521.2	antisense	0.314672	0.207843	0.024216	0	0	0	0.036985	0	0	0.03068
G1	ENSG00000246350	AL049543.1	antisense	0.450742	0.334159	0.248351	0.129881	0.141427	0.185203	0.130219	0.104491	0.073912	0.08705
G1	ENSG00000246363	LINC02458	lincRNA	0.14153	0.180248	0.036493	0.051634	0.087032	0.066487	0.162565	0.153872	0.05531	0
G1	ENSG00000246889	AP000487.1	antisense	3.56951	2.34735	3.1408	3.16874	2.33897	2.95452	0.965383	1.7141	1.02693	1.90912
G1	ENSG00000247092	SNHG10	antisense	29.0486	26.3631	19.0889	17.2941	14.9538	15.3082	15.745	16.2866	10.0498	11.2673
G1	ENSG00000247516	MIR4458HG	lincRNA	4.81211	4.78134	6.91974	6.42099	3.58532	6.17752	2.76612	4.00686	2.98675	2.75167
G1	ENSG00000247626	MARS2	protein_coding	22.9881	23.906	7.61496	7.53364	10.8713	12.0522	9.02819	10.2859	3.36414	3.85405
G1	ENSG00000248124	RRN3P1	transcribed_unprocessed_pseudogene	3.43415	2.95239	2.90968	2.37931	2.66654	2.55285	3.28569	2.95558	2.02472	1.73978
G1	ENSG00000248370	LINC02434	lincRNA	19.4432	19.1415	13.7187	11.149	14.3346	14.5536	9.99918	10.7245	4.31208	4.33397
G1	ENSG00000248461	LINC02119	lincRNA	0.176972	0.178757	0	0	0.04006	0.015264	0.026009	0	0	0
G1	ENSG00000248476	BACH1-IT1	sense_intronic	2.09441	1.46465	0.924026	0.714686	1.357	1.4321	1.32079	1.22158	1.09502	1.16271
G1	ENSG00000248503	AL356235.1	transcribed_processed_pseudogene	1.03497	0.879138	0.286788	0.292344	0.318354	0.278651	0.367941	0.182451	0.227237	0.298728
G1	ENSG00000248943	AC140125.1	lincRNA	3.84848	3.65229	1.14992	1.22403	3.1995	2.96653	2.91717	4.21303	0.990498	0.543632
G1	ENSG00000249026	CTNNA1P1	processed_pseudogene	0.113681	0.11551	0.011071	0.014579	0.046103	0.02278	0.061012	0.07928	0.055869	0.023766
G1	ENSG00000249345	LINC02405	lincRNA	1.27709	1.89931	0.745527	0.89489	1.17012	1.45767	0.812518	1.14352	0.795828	0.528089
G1	ENSG00000249378	LINC01060	lincRNA	8.84293	8.52718	4.78742	4.69048	10.142	10.3088	5.75838	6.3405	4.63345	5.30485
G1	ENSG00000249637	AC008438.1	antisense	11.4486	11.1343	2.16942	1.8366	3.43059	2.20448	2.34797	1.73833	1.60438	2.17256
G1	ENSG00000249661	TNRC18P1	processed_pseudogene	0.193807	0.181322	0.131211	0.084867	0.0967	0.059362	0.120631	0.041262	0.088302	0.098355
G1	ENSG00000249850	KRT18P31	processed_pseudogene	0.82084	1.19982	0.432043	0.334553	0.332004	0.40892	0.724807	0.610025	0.241282	0.41991
G1	ENSG00000249884	RNF103-CHMP3	protein_coding	0.507642	0.648296	0.218811	0.230702	0.405761	0.388239	0.567795	0.405646	0.423468	0.264872
G1	ENSG00000249926	AC117500.1	lincRNA	0.314191	0.482314	0.304013	0.302495	0.290757	0.340765	0.157144	0.261879	0.245006	0.234643
G1	ENSG00000249992	TMEM158	protein_coding	51.5024	53.2167	15.8082	14.435	51.4952	57.8126	37.873	42.2524	12.0654	15.6698
G1	ENSG00000250072	SH3TC2-DT	lincRNA	3.06311	3.39026	2.33099	2.04067	3.48852	3.093	2.62952	2.94293	1.31048	1.16651
G1	ENSG00000250240	AC008840.1	antisense	1.86983	1.43479	1.32322	0.970442	1.68941	2.0821	1.23212	1.56613	0.730194	0.82126
G1	ENSG00000250365	AL139353.2	antisense	0.579088	0.254433	0.156974	0.071495	0.433118	0.247788	0.250282	0.309312	0.117588	0.231115
G1	ENSG00000250657	AC097451.1	processed_transcript	0.689903	0.818188	0.301032	0.140028	0.529005	0.711312	0.50432	0.501976	0	0
G1	ENSG00000250853	RNF138P1	processed_pseudogene	0.938052	1.32798	0.461948	0.699542	0.217543	0.846169	0.675779	0.321525	0.262142	0.276019
G1	ENSG00000250992	AC139491.3	antisense	6.41483	6.40993	2.84308	2.99369	6.00906	5.24445	6.27383	7.50423	1.87538	1.8154
G1	ENSG00000251023	AC114980.1	sense_intronic	0.11576	0.103704	0.02124	0.03284	0.08809	0.112752	0.025426	0.07516	0.040502	0.018528
G1	ENSG00000251127	AC091173.1	lincRNA	0.270431	0.522762	0.057822	0.146135	0.442226	0.40522	0.284255	0.319487	0.050256	0
G1	ENSG00000251129	LINC02506	lincRNA	41.7064	40.034	29.7409	31.4089	25.1099	28.122	32.3736	31.6628	24.5162	22.4892
G1	ENSG00000251141	MRPS30-DT	antisense	1.88261	2.32098	1.51852	1.03835	1.66652	1.63617	1.30316	0.973433	0.592832	0.677576
G1	ENSG00000251194	AL133330.1	sense_intronic	1.34065	1.31978	0.610329	0.547789	1.00219	1.23808	1.36282	1.15176	0.124467	0.218
G1	ENSG00000251226	AP001999.1	lincRNA	4.89037	5.41499	4.05988	3.79414	3.13921	3.53531	3.42001	3.0374	2.51818	2.71136
G1	ENSG00000251323	AP003086.1	lincRNA	1.55238	1.18213	0.795573	0.728071	0.946868	0.806991	0.707605	1.47942	0.497077	0.509087
G1	ENSG00000251348	HSPD1P11	processed_pseudogene	2.32688	2.56651	1.8729	1.73924	1.45137	1.33463	2.63174	2.07454	0.56965	0.616984
G1	ENSG00000251441	RTEL1P1	processed_pseudogene	0.101896	0.109237	0.049786	0.058502	0.032602	0.025656	0.058129	0.073526	0.022092	0.049456
G1	ENSG00000251442	LINC01094	lincRNA	1.27039	1.58289	1.58706	1.31879	2.15255	1.91556	0.995051	2.05258	0.833646	0.721566
G1	ENSG00000251536	AC055717.1	lincRNA	0.098499	0.128145	0.006699	0.056756	0.132813	0.107181	0.050157	0.045675	0.011695	0.009332
G1	ENSG00000251598	AC096711.3	lincRNA	0.467215	0.356519	0.188981	0.162643	0.221336	0.199967	0.321034	0.361589	0.106441	0.279375
G1	ENSG00000251682	AC122718.2	processed_pseudogene	0.713316	0.984587	0.222817	0.108437	0.217366	0.188428	0.423132	0.249554	0.37395	0.195805
G1	ENSG00000251791	SCARNA6	scaRNA	0.199334	0.40505	0.22387	0.010233	0.130219	0.303291	0.587991	0.263047	0	0.105582
G1	ENSG00000251867	AC009812.1	antisense	4.31542	4.07257	3.04193	3.20856	1.78946	1.73611	1.94163	1.36908	2.50993	2.44037
G1	ENSG00000252050	RF00322	snoRNA	0.688479	0.826914	0	0.219021	0.296003	0.595938	0.227706	0.978584	0	0.015605
G1	ENSG00000253218	KLF3P1	processed_pseudogene	1.82628	1.90142	0.209678	0.136646	0.407725	0.339863	0.164813	0.238365	0.356408	0.335471
G1	ENSG00000253230	LINC00599	lincRNA	0.120569	0.108402	0	0.069352	0.098965	0	0.067898	0.089024	0	0.015212
G1	ENSG00000253256	AC134043.1	antisense	0.177811	0.117742	0	0	0.092079	0.093741	0.065547	0	0.032078	0
G1	ENSG00000253276	CCDC71L	protein_coding	4.70012	4.04785	2.22426	1.96097	4.69715	4.37227	2.99222	2.83232	1.96564	2.67251
G1	ENSG00000253307	AC011676.1	antisense	6.63231	5.40262	0.631249	0.811324	0.98085	1.58494	1.11507	1.60314	1.4601	1.51897
G1	ENSG00000253399	AC078852.1	sense_intronic	0.196213	0.271069	0	0	0.004073	0	0.021414	0.009359	0.056191	0.013801
G1	ENSG00000253522	MIR3142HG	lincRNA	0.037515	0	0	0	0.017201	0.063337	0.019676	0.06842	0	0
G1	ENSG00000253616	AC107959.3	antisense	3.55088	3.717	2.75297	1.83672	0.886845	1.60822	0.689197	0.438774	0.633537	0.588771
G1	ENSG00000253633	AP002852.1	lincRNA	3.53642	3.21863	1.18742	1.28337	2.63825	2.67441	1.15572	1.19001	0.435845	0.216677
G1	ENSG00000253775	AC100802.1	lincRNA	0.165919	0.117034	0	0	0.032897	0.096064	0.033907	0.051958	0.017768	0
G1	ENSG00000253993	AC104027.1	processed_pseudogene	0.40519	0.369837	0.044944	0	0.128038	0.233106	0	0	0	0
G1	ENSG00000254094	AC078852.2	sense_intronic	0.660661	0.892858	0.035956	0	0.073991	0.023584	0.132826	0.002785	0.094143	0.015721
G1	ENSG00000254207	AC100797.1	sense_intronic	0.436013	0.256507	0	0.125726	0.032903	0	0.235053	0	0.031062	0.177351
G1	ENSG00000254229	FAM90A12P	unprocessed_pseudogene	0.331849	0.270808	0.099188	0.110585	0.293522	0.310229	0.136935	0.313887	0.060212	0.053236
G1	ENSG00000254400	AC091564.2	antisense	1.73914	0.839411	0.722232	0.955547	1.20206	1.62268	1.10192	0.728858	0.501718	0.225068
G1	ENSG00000254454	RCC2P6	processed_pseudogene	0.336799	0.23988	0.113675	0.110956	0.149382	0.145516	0.106893	0.201741	0.022352	0.09521
G1	ENSG00000254530	AC090124.1	lincRNA	0.056231	0.146179	0	0.042972	0.082734	0.175535	0	0	0	0
G1	ENSG00000254547	AC036111.1	unprocessed_pseudogene	1.61285	1.76006	0.931742	0.948044	0.65696	0.817966	0.376277	0.317172	0.629169	0.737951
G1	ENSG00000254550	OMP	protein_coding	1.63676	1.62687	0.484697	0.418695	0.387901	0.299602	0.339772	0.276279	0.048156	0.16442
G1	ENSG00000254579	AC090720.1	processed_pseudogene	0.120026	0.026644	0.00225	0.020039	0.005375	0.02218	0.007111	0.048854	0	0.010118
G1	ENSG00000254615	AC027031.2	lincRNA	36.4708	34.5825	22.6118	20.3258	15.724	16.2928	15.8054	19.0436	16.4659	15.8834
G1	ENSG00000254905	AP001318.1	antisense	0.855746	1.43677	0.597914	0.285926	0.305073	0.44945	0.477027	0.292458	0.125996	0.278328
G1	ENSG00000254916	AP004607.4	unprocessed_pseudogene	0.620701	0.684961	0.407173	0.467833	0.327379	0.275432	0.199695	0.470464	0.250391	0.28196
G1	ENSG00000255112	CHMP1B	protein_coding	49.1526	43.2644	19.0913	18.815	22.3116	26.0726	14.8187	15.6422	17.8855	18.1951
G1	ENSG00000255150	EID3	protein_coding	2.71929	2.83765	0.454662	0.481035	0.948635	0.793107	0.169412	0.333254	0.226108	0.248171
G1	ENSG00000255154	HTD2	protein_coding	14.7443	14.6798	10.8664	11.4483	12.3209	13.7887	13.6892	12.6245	11.051	11.6271
G1	ENSG00000255248	MIR100HG	processed_transcript	27.6876	26.6524	8.74394	9.24076	13.0125	20.7087	8.85174	15.1426	4.40963	5.46976
G1	ENSG00000255409	RSF1-IT1	sense_intronic	0.775796	0.308622	0.160259	0.215361	0.11226	0.106504	0.323191	0.021043	0.079434	0.136647
G1	ENSG00000255496	AC103796.1	sense_overlapping	0.189446	0.187273	0.033645	0.094267	0.021559	0.087389	0.102656	0.233785	0	0.031167
G1	ENSG00000255498	AC068385.1	antisense	0.602471	0.9028	0.277484	0.337569	0.375016	0.326178	0.278773	0.461635	0.415208	0.32766
G1	ENSG00000255571	MIR9-3HG	lincRNA	2.25354	2.6975	1.73516	1.40588	1.77468	2.95412	2.71034	2.80026	0.644182	0.557453
G1	ENSG00000255690	TRIL	protein_coding	3.53708	3.72385	2.72919	2.35814	2.89225	2.39434	2.13667	2.07884	1.62594	1.82887
G1	ENSG00000255836	AC131206.1	processed_pseudogene	32.7737	32.1086	20.4336	17.1174	15.0206	17.3275	15.7402	17.9174	16.645	15.8977
G1	ENSG00000255847	AP003717.1	antisense	0.177777	0.099869	0.080794	0.007461	0.043081	0.031451	0.049838	0.021642	0.029176	0.041202
G1	ENSG00000256060	TRAPPC2B	protein_coding	19.475	15.8649	18.7508	19.2125	13.6932	14.7663	12.4791	15.3524	8.63531	9.04897
G1	ENSG00000256128	LINC00944	lincRNA	23.8744	24.3965	6.96101	5.8603	9.39804	12.7367	6.41043	5.2946	8.64667	5.57895
G1	ENSG00000256341	AP006333.1	antisense	0.532214	0.692075	0.611703	0.433241	0.189683	0.332216	0.314257	0.240032	0.299313	0.337482
G1	ENSG00000256712	AC134349.1	sense_intronic	1.01016	0.947775	0.538132	0.516031	0.549093	0.369334	0.917766	1.08643	0.396929	0.333991
G1	ENSG00000256843	AC023157.2	processed_pseudogene	0.847654	1.77477	0.529721	0.83402	0.914519	0.642882	0.329724	0.161129	0.845959	0.820113
G1	ENSG00000256981	AC134349.2	unprocessed_pseudogene	1.88966	2.25278	0.636125	0.604617	1.17763	1.2069	1.08914	0.862775	0.348372	0.698899
G1	ENSG00000257052	AP003721.4	antisense	0.594088	0.667736	0.105951	0.131344	0.229771	0.325396	0.062352	0.211409	0.175891	0.134725
G1	ENSG00000257246	PHBP19	processed_pseudogene	0.306841	0.201666	0.102405	0.175504	0.185447	0.13088	0.184054	0.250588	0.061507	0.083125
G1	ENSG00000257285	AL132780.1	antisense	0.584556	0.445108	0	0.048771	0.025607	0.074306	0	0.032426	0.136724	0.085816
G1	ENSG00000257432	AL512310.3	processed_pseudogene	4.53505	4.15401	2.25059	1.31297	2.22995	1.71088	2.59796	2.53743	0.933265	0.98016
G1	ENSG00000257453	AC011611.3	antisense	0.643732	0.575078	0	0.036321	0.198369	0.380918	0.323395	0.268924	0.051469	0
G1	ENSG00000257511	AC084824.1	processed_pseudogene	3.09375	3.05778	1.00692	1.13234	1.33571	1.13956	1.43116	2.16432	1.35591	1.07651
G1	ENSG00000257548	AC078929.1	antisense	0.086362	0.108959	0	0.016275	0.053357	0.074436	0.02329	0	0.006059	0.089793
G1	ENSG00000257576	HSPD1P4	processed_pseudogene	0.602903	0.589127	0.151	0.193748	0.310142	0.17959	0.277904	0.417349	0.447217	0.375788
G1	ENSG00000257594	GALNT4	protein_coding	10.3624	9.65007	2.24192	2.42922	6.30727	6.72943	10.4379	9.72541	1.59995	3.08062
G1	ENSG00000257599	OVCH1-AS1	antisense	0.438387	0.37387	0.302661	0.329088	0.330182	0.234244	0.225515	0.300162	0.206622	0.244883
G1	ENSG00000257635	CR383656.4	transcribed_processed_pseudogene	8.00502	6.96655	3.02357	2.901	3.79331	3.21482	4.63446	4.19513	1.48285	1.44768
G1	ENSG00000257681	AC025265.1	antisense	3.70137	2.92158	2.06238	1.66232	2.51531	1.89278	2.55678	2.36482	1.71778	1.74979
G1	ENSG00000257913	DDN-AS1	antisense	0.389295	0.300593	0.533078	0.177069	0.199255	0.169428	0.187373	0.301615	0.185424	0.127113
G1	ENSG00000257954	AC125611.2	processed_pseudogene	3.4804	3.32709	1.08504	0.746168	0.7712	1.23505	0.659479	0.532628	0.863983	1.1382
G1	ENSG00000258038	LINC02327	lincRNA	11.5609	10.3086	7.90646	7.85035	6.89037	8.4953	4.187	7.86961	2.96918	3.62933
G1	ENSG00000258099	ATXN2-AS	antisense	2.04724	1.71806	0.54544	0.446543	1.37429	1.2919	1.17875	0.804301	0.941469	0.436358
G1	ENSG00000258400	AL591767.1	antisense	1.39165	1.18962	0.43063	0.416363	0.374458	0.420852	0.592036	1.29886	0.653871	0.443481
G1	ENSG00000258441	LINC00641	processed_transcript	4.98906	4.53098	1.67212	1.33933	3.02545	2.48008	3.93707	4.35138	2.67215	2.86325
G1	ENSG00000258450	AL139099.2	sense_intronic	4.1317	2.3423	3.4814	1.19869	3.3396	2.39626	2.33639	4.30856	0.559615	0.426316
G1	ENSG00000258469	CHMP4BP1	processed_pseudogene	13.3573	12.7496	2.59527	1.44931	0.574122	0.520961	1.06261	0.96509	1.85353	1.58708
G1	ENSG00000258553	AL157911.1	antisense	0.213428	0.175593	0.090755	0.098815	0.113285	0.170823	0.031464	0.328059	0	0.208497
G1	ENSG00000258599	AL355922.2	processed_pseudogene	1.91892	2.10418	1.67158	0.983984	1.25957	0.890933	0.721384	0.825076	0.678958	0.804611
G1	ENSG00000258655	ARHGAP5-AS1	antisense	4.10166	3.92436	2.12738	1.86159	3.96345	3.79747	2.08517	2.00906	1.96167	1.75119
G1	ENSG00000258725	PRC1-AS1	antisense	0.574515	0.770806	0.609614	0.433355	0.894424	0.537037	0.235478	0.343912	0.103002	0.195743
G1	ENSG00000258789	AL162171.1	antisense	3.26395	3.18437	1.87424	1.51686	1.13433	1.03249	1.14886	0.87075	1.60438	1.70412
G1	ENSG00000258813	AL442663.3	antisense	2.47357	2.07516	1.50561	1.03842	1.57597	2.50636	1.37412	1.34081	0.440463	0.665583
G1	ENSG00000258891	AC005480.1	antisense	0.1123	0.216406	0.072643	0.021311	0.041127	0.121783	0.125456	0.085199	0.04969	0.053709
G1	ENSG00000258957	AL359317.2	lincRNA	1.23589	1.5132	0.344861	0.335065	0.424773	0.251183	0.331531	0.270931	0.117194	0.439421
G1	ENSG00000258997	NF1P2	unprocessed_pseudogene	1.92378	2.13916	0.805916	0	1.93459	1.64665	2.07568	2.12404	0.423479	0.531551
G1	ENSG00000259172	AC023024.1	antisense	0.553969	0.329495	0.252311	0.185575	0.26562	0.271005	0.109016	0.131324	0.064311	0.083249
G1	ENSG00000259200	AC068722.1	lincRNA	0.158546	0.132032	0	0.062833	0.016085	0	0	0	0	0
G1	ENSG00000259205	PRKXP1	processed_pseudogene	1.28409	1.08784	0.345785	0.544356	0.700111	0.839822	1.03031	1.08078	0.64532	0.709782
G1	ENSG00000259470	KRT8P9	processed_pseudogene	0.280445	0.201788	0.016315	0	0.06334	0.025942	0	0.037979	0.00847	0.002372
G1	ENSG00000259540	AC027020.1	antisense	2.2506	1.78994	0.678908	0.571479	1.06987	0.692663	1.34001	1.30904	0.672811	0.622486
G1	ENSG00000259581	TYRO3P	processed_pseudogene	0.257518	0.207904	0.089921	0.059948	0.079748	0.069778	0.079423	0.046724	0.072558	0.014218
G1	ENSG00000259623	AC125257.1	sense_overlapping	12.0422	11.4489	9.92429	8.33035	8.49204	7.42109	9.90012	9.21573	5.85276	5.66045
G1	ENSG00000259630	AC104046.1	transcribed_processed_pseudogene	3.44553	3.51347	0.267005	0.118664	0.295568	0.246737	0.115405	0.100079	0.320676	0.146573
G1	ENSG00000259687	LINC01220	lincRNA	1.68788	1.60483	1.13576	0.706725	2.49899	1.93125	0.240075	0.84372	0.229772	0.154745
G1	ENSG00000259706	HSP90B2P	processed_pseudogene	1.54656	1.29244	0.258539	0.532138	0.418726	0.560367	0.381418	0.436538	0.599784	0.637799
G1	ENSG00000259780	AC009065.1	lincRNA	0.913352	0.849099	0.42192	0.265487	0.347314	0.346312	0.243871	0.369576	0.487651	0.458804
G1	ENSG00000259820	AC083843.2	lincRNA	2.72603	2.593	2.13399	2.04282	3.14594	3.34318	2.5698	2.61393	1.05123	0.930903
G1	ENSG00000259826	AC072061.1	antisense	1.1356	1.24931	0.527132	0.413024	0.704163	0.85516	0.413287	0.504543	0.348072	0.380117
G1	ENSG00000259848	AC097374.1	transcribed_unprocessed_pseudogene	53.5941	48.2042	5.5417	6.8767	22.5491	18.8362	37.9062	40.7013	18.6946	19.1166
G1	ENSG00000259877	AC009113.1	antisense	6.56446	6.58846	5.13134	5.07243	5.83091	5.1963	3.85513	3.5328	3.10809	2.66771
G1	ENSG00000259984	AL928711.1	unprocessed_pseudogene	0	1.07119	0.841487	1.38328	0.493851	0.512637	0.76412	0.903077	0.337833	0.083217
G1	ENSG00000259993	AC135731.1	processed_pseudogene	0.311817	0.434294	0.295997	0.226116	0.271222	0.266898	0.28146	0.153167	0.067804	0.050741
G1	ENSG00000259994	AL353796.1	sense_overlapping	1.98332	1.77602	1.15278	0.669959	1.38495	1.22649	1.2733	1.26017	0.597101	0.647837
G1	ENSG00000260060	AC009088.1	antisense	0.870573	0.991441	0.608816	0.503707	1.05224	0.589255	0.703313	0.759197	0.463199	0.487083
G1	ENSG00000260064	AC092332.1	sense_intronic	0.41049	0.23775	0.059419	0.223521	0.181838	0.086856	0.134945	0.16607	0.0253	0.03059
G1	ENSG00000260101	AC008074.2	lincRNA	0.727059	0.8904	0.377743	0.347374	0.20961	0.301277	0.22746	0.179833	0.188196	0.212232
G1	ENSG00000260105	AOC4P	transcribed_unprocessed_pseudogene	0.515502	0.400614	0.050913	0.114421	0.184154	0.25848	0.135169	0.246139	0.177651	0.327388
G1	ENSG00000260186	LINC02137	lincRNA	0.230847	0.510034	0	0	0.183219	0.138037	0.154823	0.132177	0.171952	0.070354
G1	ENSG00000260190	AL807752.5	sense_overlapping	3.09498	2.72659	0.575936	0.642868	1.36422	1.31946	1.10469	1.30634	1.26877	1.51895
G1	ENSG00000260211	AC139426.1	processed_pseudogene	0.56764	0.659946	0.380182	0.2281	0.385294	0.31346	0.225302	0.283702	0.068728	0.082891
G1	ENSG00000260302	AP005482.1	lincRNA	38.6037	35.8809	18.5963	20.5345	38.8332	42.555	27.539	30.6141	10.4681	10.6812
G1	ENSG00000260339	HEXA-AS1	antisense	0.455186	0.454517	0.418164	0.282079	0.297225	0.312512	0.171528	0.088224	0.068625	0.077738
G1	ENSG00000260350	AC012173.1	antisense	1.78928	1.23356	0.893647	0.727015	0.678077	0.299487	0.535506	0.317553	0.557878	0.470677
G1	ENSG00000260493	AC011773.4	antisense	0.230345	0.298919	0.189304	0.060427	0.122731	0.196853	0.075286	0.123213	0.064038	0.133147
G1	ENSG00000260526	AC109347.1	antisense	1.27544	1.15219	0.907482	0.820698	0.637857	0.669903	0.272498	0.363412	0.260249	0.269821
G1	ENSG00000260643	AC092718.3	protein_coding	12.6405	6.25869	2.93485	3.76048	4.3464	4.96816	6.59252	6.08606	3.35345	3.44591
G1	ENSG00000260686	AC008669.1	sense_overlapping	0.284538	0.154373	0.026372	0.02378	0.129146	0.062467	0.037063	0.085446	0.056103	0.034852
G1	ENSG00000260708	AL118516.1	antisense	100.99	97.2407	37.2533	35.5056	25.6665	32.8943	23.0536	25.9649	23.5526	25.886
G1	ENSG00000260727	SLC7A5P1	unprocessed_pseudogene	21.9697	25.834	4.88036	4.88726	7.61324	9.48112	7.19	9.20838	8.03463	8.43821
G1	ENSG00000260742	AC009962.1	antisense	0.28336	0.200297	0.097997	0.114854	0.200424	0.164694	0.162816	0.168479	0.022716	0.076992
G1	ENSG00000260806	AL163051.1	antisense	1.68865	1.58208	0.763388	0.728078	0.576371	0.747419	0.39426	0.401701	0.421546	0.470278
G1	ENSG00000260830	AL135744.1	antisense	1.19591	0.879666	0.740248	0.413004	1.01035	0.933961	0.817226	1.14176	0.195254	0.267967
G1	ENSG00000260862	AC099506.1	sense_intronic	0.171778	0.159365	0.065306	0.063521	0.116224	0.108443	0.087113	0.062018	0.106141	0.046004
G1	ENSG00000260920	AL031985.3	sense_overlapping	36.1778	35.6488	19.0811	18.5019	27.057	29.1344	23.1076	22.2324	13.8794	14.4431
G1	ENSG00000260948	AL390195.2	sense_overlapping	1.55317	1.35481	0.329646	0.226086	0.915982	0.699192	0.903675	0.934068	0.563317	0.720609
G1	ENSG00000260966	AP001486.2	sense_overlapping	0.900374	0.812753	0.272563	0.177632	0.620846	0.533479	0.404448	0.377841	0.229627	0.205066
G1	ENSG00000260997	AC004847.1	sense_overlapping	0.10216	0.110615	0.028222	0.01419	0.080129	0.051466	0.041481	0.029661	0.014268	0.037731
G1	ENSG00000261029	AC138304.1	lincRNA	0	0	0	0	0.039539	0	0	0	0	0
G1	ENSG00000261051	AC107021.2	sense_overlapping	0.557254	0.494574	0.328443	0.18367	0.53794	0.490739	0.569566	0.55737	0.12151	0.174949
G1	ENSG00000261079	AC009053.2	lincRNA	0.178121	0.235112	0.088234	0.11678	0.175765	0.146744	0.094182	0.189103	0.027821	0.069375
G1	ENSG00000261083	LINC02516	lincRNA	0.034463	0.017225	0.015176	0	0.002028	0.027978	0.004491	0.015537	0	0
G1	ENSG00000261117	AC009486.1	lincRNA	1.88183	1.32208	0.358775	0.486525	0.443833	0.541786	0.304687	0.403546	0.408665	0.602206
G1	ENSG00000261220	AC103706.1	lincRNA	16.8405	12.3222	12.1701	9.08036	8.74418	10.8352	8.8837	8.93442	2.89218	3.64484
G1	ENSG00000261324	AC010168.2	sense_overlapping	6.74494	6.11487	1.61228	1.35142	2.40058	2.32246	2.12146	1.97649	0.806026	0.817361
G1	ENSG00000261407	AC013565.3	antisense	0.376802	0.23474	0	0.18419	0.256591	0.328729	0.166801	0.201186	0	0.194601
G1	ENSG00000261409	AL035425.3	sense_overlapping	0.258422	0.314972	0.126627	0.13562	0.177852	0.165002	0.126418	0.206966	0.094023	0.052116
G1	ENSG00000261428	AC097461.1	antisense	1.5875	1.5513	0.857992	0.837473	0.933504	1.15739	0.616822	0.677351	0.907644	0.778112
G1	ENSG00000261441	AC124068.2	antisense	1.02277	0.809954	0.182786	0.112396	0.347418	0.316862	0.120197	0.160118	0.133002	0.126375
G1	ENSG00000261468	AC096921.2	sense_overlapping	1.4612	1.41224	0.340924	0.267112	0.995603	0.87459	0.930729	0.842764	0.19165	0.186176
G1	ENSG00000261526	AC012615.1	lincRNA	11.4955	9.35727	5.06376	4.99425	4.43135	4.13684	3.49021	3.46285	2.15451	2.5197
G1	ENSG00000261582	AL121753.1	protein_coding	1.64675	2.8132	0.277813	0.492251	0.612217	0.456532	0.292292	0.601892	0.3707	0.828472
G1	ENSG00000261596	AC005632.2	sense_intronic	0.722018	0.840062	0.539758	0.321931	0.595816	0.628338	0.852209	0.762556	0.314948	0.299503
G1	ENSG00000261659	Z92544.2	processed_transcript	0.474327	0.463165	0.396868	0.278346	0.406535	0.206962	0.444969	0.441873	0.340688	0.371976
G1	ENSG00000261678	SCRT1	protein_coding	0.842777	0.934184	0.179608	0.138586	0.591326	0.548892	0.550488	0.495323	0.128908	0.134164
G1	ENSG00000261845	AC124283.1	antisense	0.286161	0.39649	0.131583	0.090997	0.138809	0.126515	0.081951	0.163863	0.076702	0.031894
G1	ENSG00000261889	AC108134.2	lincRNA	3.59616	4.13457	0.820161	0.936523	2.07375	2.16172	1.15434	1.25425	0.798002	0.922702
G1	ENSG00000262119	AL079343.1	sense_intronic	0.082887	0.215554	0.047659	0.086664	0.076302	0.054693	0.03425	0.030867	0.009387	0.014223
G1	ENSG00000262454	MIR193BHG	lincRNA	2.46133	2.42283	1.61308	1.60705	2.33387	1.83134	1.83382	2.32192	1.04961	1.15652
G1	ENSG00000262652	AC124283.3	sense_intronic	1.75548	1.8657	1.02841	1.12135	1.6499	1.26923	1.64041	1.9394	0.700573	0.870054
G1	ENSG00000263069	AC124319.2	antisense	2.54483	1.87038	1.19259	1.35739	1.36393	1.30252	1.3144	0.91176	1.03589	1.06384
G1	ENSG00000263366	ABHD17AP5	processed_pseudogene	5.66564	4.40423	1.86165	1.76227	4.84053	3.41295	3.80714	4.75584	1.25937	1.67894
G1	ENSG00000263612	AF186192.3	lincRNA	1.71857	1.95982	0.638988	0.787544	0.559501	0.553046	0.148046	0.320972	0.73088	0.601434
G1	ENSG00000263750	MIR548AV	miRNA	1.5346	0.753624	0.031067	0.527758	0.30364	0.37286	0.451085	0.057695	0.097729	0.166863
G1	ENSG00000263823	AC009831.1	antisense	1.76805	1.82525	0.671371	0.440635	0.85782	0.640026	0.327338	0.599834	0.338421	0.311508
G1	ENSG00000263826	AC112907.3	antisense	0.512496	0.731196	0.407264	0.478476	0.41084	0.294843	0.221862	0.34204	0.084317	0.227117
G1	ENSG00000264235	AP005329.1	antisense	0.900182	0.697183	0.368724	0.44039	0.43868	0.977194	0.308854	0.586268	0.422908	0.42308
G1	ENSG00000265019	NCOR1P2	unprocessed_pseudogene	6.73583	7.40842	4.65426	4.59357	10.2168	5.9962	6.18232	6.57172	2.07851	2.75899
G1	ENSG00000265345	MIR5188	miRNA	1.15895	1.21206	0.683302	0.17678	0.635215	0.428221	0.494193	0.922884	0.09418	0.330637
G1	ENSG00000265417	AP005119.2	processed_pseudogene	22.6138	24.238	13.2663	13.3663	15.3873	11.9454	10.093	10.4599	10.6242	15.9163
G1	ENSG00000265452	MIR3682	miRNA	7.6022	5.83772	4.07061	4.19989	4.54316	4.80674	6.88156	6.56236	2.80579	2.1887
G1	ENSG00000265462	MIR3680-1	miRNA	2.31336	1.06767	0.239699	0.212987	0.401408	0.260002	0.499938	0.210851	0.344656	0
G1	ENSG00000266357	LINC02074	lincRNA	59.1093	58.1803	13.397	15.2782	36.8436	44.6271	38.5264	43.9023	15.7157	14.3506
G1	ENSG00000266501	AC025198.1	processed_pseudogene	0.312932	0.744581	0.145236	0.158559	0.054328	0.118453	0.065014	0.095223	0.111053	0.021586
G1	ENSG00000266897	AC005546.1	lincRNA	0.63932	0.365752	0.18801	0.232615	0.291363	0.26179	0.336687	0.321943	0.227484	0.148832
G1	ENSG00000266910	AC008507.1	processed_pseudogene	0.81762	1.121	0.632172	0.395128	0.715744	0.504955	0.695677	0.954664	0.348493	0.163936
G1	ENSG00000267009	AC007780.1	processed_transcript	3.29994	2.70919	2.76233	1.79806	1.65795	1.81967	1.60963	1.98879	2.8757	2.14682
G1	ENSG00000267160	AC091152.2	antisense	0.692668	0.730922	0.397128	0.378552	0.661067	0.511177	0.702246	0.733726	0.243356	0.390697
G1	ENSG00000267192	AC006116.4	antisense	0.254681	0.214029	0.082576	0.103988	0.123907	0.191886	0.104536	0.080453	0.133457	0.006545
G1	ENSG00000267216	AC020915.1	protein_coding	5.66182	5.08322	8.14533	5.21521	5.14112	9.25053	8.93143	7.43239	10.1138	5.25848
G1	ENSG00000267254	ZNF790-AS1	antisense	8.72991	8.1083	6.63269	5.38166	4.47171	5.85562	5.25621	5.04474	5.05903	5.41272
G1	ENSG00000267316	AC090409.2	lincRNA	0.76572	0.756457	0.330497	0.69932	1.26807	1.00686	1.08894	0.65227	0.421123	0.245332
G1	ENSG00000267328	AC002398.2	antisense	0.561725	0.542736	0.138014	0.140605	0.112426	0.083502	0.163134	0.249243	0.122161	0.005379
G1	ENSG00000267405	AC005180.1	lincRNA	1.90766	2.1913	0.786629	0.685082	1.33868	1.18542	0.599113	0.236073	0.771523	0.662842
G1	ENSG00000267493	CIRBP-AS1	antisense	1.44644	1.56891	0.686453	1.00811	1.63761	1.84346	0.605292	1.11679	0.343003	0.486086
G1	ENSG00000267497	NFE2L3P1	processed_pseudogene	1.04346	1.49788	0.419336	0.279797	0.315731	0.390138	0.186056	0.208624	0.098658	0.173719
G1	ENSG00000267504	AC090236.2	sense_intronic	0.15575	0.189806	0.073151	0.072574	0.09798	0.153599	0.222842	0.057148	0.008255	0.0919
G1	ENSG00000267519	AC020916.1	antisense	1.73738	1.85984	0.986662	0.827024	1.26654	1.28605	1.15617	1.22025	0.295174	0.39732
G1	ENSG00000267598	AC011446.2	antisense	0.598481	0.600716	0.503447	0.698689	0.505768	0.661865	0.777283	0.488816	0.277551	0.36441
G1	ENSG00000267757	EML2-AS1	processed_transcript	0.76582	1.35317	0.850657	1.00415	0.939364	1.36264	0.698727	0.828432	0.096284	0.242364
G1	ENSG00000267904	AC024075.1	sense_intronic	1.30859	1.40979	0.530434	0.682451	0.859605	1.05465	1.09522	1.09676	0.581665	0.568136
G1	ENSG00000268001	CARD8-AS1	antisense	7.01526	6.4153	3.50506	3.24154	5.76384	6.62921	6.51175	6.74929	2.91304	3.03387
G1	ENSG00000268095	ZNF649-AS1	antisense	0.472811	0.332432	0.144689	0	0.165076	0.151834	0	0.099007	0.090632	0.086573
G1	ENSG00000268333	AL132655.1	lincRNA	2.28789	2.23167	1.7796	2.49594	2.18796	2.28114	2.565	2.809	1.89037	1.87317
G1	ENSG00000268536	AC005523.1	lincRNA	0.512238	0.602122	0.251813	0.060764	0.133625	0.159372	0.078203	0.105105	0.139753	0.255003
G1	ENSG00000268543	AC012313.4	TEC	1.78453	1.42401	1.04887	1.51252	1.85642	2.28646	1.45083	1.60325	0.891064	1.18529
G1	ENSG00000268635	AP003680.1	antisense	0.074776	0.018952	0	0.021758	0.01737	0.033279	0.022254	0.013683	0.010994	0
G1	ENSG00000268670	AC016586.1	sense_intronic	0.347274	0.640416	0.346825	0.166289	0.221415	0.224743	0.309627	0.229825	0.070907	0.145717
G1	ENSG00000268798	AC027307.3	lincRNA	2.42045	1.98941	0.809312	0.501826	1.10464	1.10404	1.04002	1.09414	1.29206	1.26732
G1	ENSG00000268945	AC010422.2	lincRNA	0.363006	0.3248	0.256682	0.124039	0.365861	0.226808	0.097891	0.312676	0.0367	0.039235
G1	ENSG00000269044	AC024075.2	sense_intronic	1.32005	1.16953	1.0233	0.748153	1.31196	1.17345	1.06707	1.13252	0.581689	0.681226
G1	ENSG00000269296	AC005614.1	antisense	0.160222	0.078745	0.0203	0.062726	0.040254	0.035021	0.029654	0.03008	0.025306	0.020756
G1	ENSG00000269343	ZNF587B	protein_coding	26.7613	26.1508	12.7714	13.1403	11.7833	12.0389	14.0418	16.1322	5.26708	6.59698
G1	ENSG00000269486	ERVK9-11	lincRNA	1.94549	2.19409	1.18233	0.853905	1.56367	1.60174	1.04837	0.811891	0.79803	0.7691
G1	ENSG00000269559	AC093677.2	antisense	0.426068	0.389952	0.216878	0.229637	0.307378	0.291201	0.129015	0.152325	0.22112	0.088522
G1	ENSG00000269586	CT45A10	protein_coding	14.1856	12.5343	6.82501	7.61693	6.46558	7.11548	5.92382	6.8981	9.58528	8.93334
G1	ENSG00000269892	AC125494.2	lincRNA	0.233211	0.441495	0	0	0.064879	0	0.10642	0	0	0.114121
G1	ENSG00000269902	AC234772.2	lincRNA	0.960072	0.736535	0.264555	0.287432	0.532268	0.620178	0.273956	0.410135	0.103576	0.140562
G1	ENSG00000269906	AL606834.1	sense_intronic	13.0843	12.3845	3.65631	4.62502	4.59265	5.0511	3.28984	3.76534	3.09866	3.03242
G1	ENSG00000269929	AL158152.1	lincRNA	6.57106	5.49538	4.21681	3.15173	5.53997	5.24238	5.39192	5.00518	0.656423	0.892535
G1	ENSG00000269939	PCF11-AS1	lincRNA	2.97384	2.997	2.54856	2.05809	1.7845	1.14099	1.61139	1.89769	0.813044	0.868153
G1	ENSG00000270036	AC027243.2	lincRNA	1.04581	1.21578	0.110993	0.284527	0.337743	0.171781	0.436581	0.257298	0.318881	0.732626
G1	ENSG00000270069	MIR222HG	lincRNA	45.1145	46.712	23.4044	23.4358	29.6112	38.9077	32.174	32.7589	6.58499	7.87294
G1	ENSG00000270175	AC023509.4	antisense	1.2926	1.79471	1.62273	1.0933	1.68683	1.91556	1.01289	0.990579	0.540263	0.999736
G1	ENSG00000270190	AC068491.3	lincRNA	0.375571	0.459839	0.130233	0.214787	0.198648	0.048676	0.335791	0.395033	0.05589	0.085506
G1	ENSG00000270194	AC097359.2	antisense	1.16366	1.29219	0.579056	0.730721	0.600337	0.503806	0.604719	0.555658	0.459001	0.577198
G1	ENSG00000270426	AC099343.2	sense_intronic	0.661945	0.420608	0.117142	0.185654	0.063848	0.136365	0.0957	0.198282	0.141095	0.095619
G1	ENSG00000270638	AL023806.1	lincRNA	0.473709	0.501756	0.253145	0.33004	0.543379	0.411575	0.144932	0.170147	0.198844	0.109186
G1	ENSG00000270640	AC104695.3	sense_intronic	18.7794	18.2147	6.66016	4.73812	2.39545	1.55386	3.63549	4.26685	2.2651	1.8982
G1	ENSG00000270681	AC095055.1	antisense	0.768593	0.832836	0.049426	0.098186	0.199279	0.150156	0.299331	0.437505	0.409696	0.274245
G1	ENSG00000270878	AL136038.4	processed_pseudogene	1.28592	1.1055	0.866297	0.48062	0.703149	0.646895	1.13061	0.913347	0.354218	0.484116
G1	ENSG00000271127	AP000526.1	sense_intronic	59.8045	57.0879	25.9979	26.7677	16.8125	18.9628	25.0884	22.741	19.8301	19.9024
G1	ENSG00000271147	ARMCX5-GPRASP2	processed_transcript	14.2377	15.6003	7.03364	9.78417	8.72371	9.61219	6.29839	8.78487	8.61772	7.1486
G1	ENSG00000271361	HTATSF1P2	processed_pseudogene	4.73816	3.95918	3.82398	3.51688	4.3956	4.14499	3.11824	3.73088	1.87938	1.6654
G1	ENSG00000271614	ATP2B1-AS1	lincRNA	1.34137	1.29688	0.68252	0.626978	1.06729	1.05735	0.381612	0.528528	0.383831	0.397022
G1	ENSG00000271659	AL161729.4	antisense	1.6707	1.81885	1.32754	1.38281	1.15739	1.2319	1.3506	1.33592	0.575758	0.525644
G1	ENSG00000271784	AL031055.1	lincRNA	0.717034	0.533099	0.170515	0.101563	0.570143	0.337603	0.211825	0.346967	0.061062	0.086137
G1	ENSG00000271797	AC008494.3	antisense	1.13774	1.27188	0.63429	0.408668	1.71867	1.17765	0.91582	0.967726	0.228794	0.655908
G1	ENSG00000271852	SNORD11B	snoRNA	3.46845	2.81526	0.803992	0.475047	1.13952	1.30363	2.25897	2.68231	0.819973	1.37313
G1	ENSG00000271858	CYB561D2	antisense	0.557321	0.334058	0.21179	0.150243	0.153329	0.148404	0.305491	0.057791	0.136155	0.09753
G1	ENSG00000271870	AC024060.1	antisense	5.30352	5.35751	4.75021	3.44523	3.52124	3.30139	3.81427	3.45133	2.34397	2.00286
G1	ENSG00000272008	AL139274.2	antisense	0.217284	0.229313	0.114785	0.082001	0.065299	0.128854	0.051199	0.05626	0.080976	0.066361
G1	ENSG00000272056	AC013472.3	antisense	1.38479	1.01712	0.355184	0.300658	0.719784	0.401716	0.429901	0.421718	0.323693	0.306819
G1	ENSG00000272072	AC004492.1	antisense	0.525164	0.595089	0.417576	0.260205	0.558359	0.28989	0.273877	0.555019	0.11045	0.298245
G1	ENSG00000272081	AC008972.2	lincRNA	0.391073	0.958682	0.348086	0.35369	0.467372	0.31449	0.576617	0.456002	0.209772	0.117383
G1	ENSG00000272086	AC025181.2	lincRNA	3.369	3.82966	2.29246	2.53846	4.28323	3.82649	2.93751	2.82514	1.14382	1.2731
G1	ENSG00000272123	AC008966.2	antisense	0.429409	0.468229	0.148423	0.130097	0.294717	0.243269	0.231718	0.351898	0.118495	0.083596
G1	ENSG00000272146	ARF4-AS1	antisense	3.00542	1.64491	1.71627	1.77352	1.92691	1.58805	1.08609	1.59909	1.02755	1.04999
G1	ENSG00000272157	AC107373.2	antisense	2.05626	1.91417	1.04728	0.693786	1.14505	0.734898	0.939532	0.610033	0.400615	0.219604
G1	ENSG00000272159	AC087623.3	antisense	0.764336	0.62124	0.423828	0.173496	0.254372	0.30711	0.200681	0.178821	0.178724	0.047434
G1	ENSG00000272183	AC005041.3	antisense	0.988541	1.2129	0.261767	0.120473	0.111292	0.210272	0.220954	0.259756	0.529528	0.541039
G1	ENSG00000272267	AC021242.3	antisense	3.54157	3.2842	1.15659	1.26473	1.54483	1.64703	1.07499	1.25704	0.558552	0.375686
G1	ENSG00000272335	AC093297.2	lincRNA	2.86746	2.32045	1.38456	1.09696	2.11745	1.98171	1.96779	1.88691	0.803852	0.703336
G1	ENSG00000272368	AC074032.1	antisense	1.44846	1.51378	0.793294	0.857439	0.639149	0.464104	0.163706	0.547492	0.775997	0.473989
G1	ENSG00000272384	AC016405.3	lincRNA	0.908583	0.592787	0.241792	0.235515	0.310079	0.524605	0.103931	0.227061	0.161377	0.047671
G1	ENSG00000272468	AL021807.1	lincRNA	26.8865	25.6898	2.5695	2.11176	11.8255	11.2904	10.5931	9.93712	3.53115	3.46705
G1	ENSG00000272518	AC036214.2	sense_intronic	2.20086	1.77218	1.00797	1.11494	0.95894	1.89949	1.27213	1.53674	1.33745	0.938671
G1	ENSG00000272525	AC099522.2	lincRNA	2.51089	2.12048	2.01461	1.61243	1.03869	0.696607	0.831749	0.828318	0.540639	0.734405
G1	ENSG00000272549	LINC02538	lincRNA	0.037297	0.059846	0	0.023207	0.028655	0.029296	0.032577	0.009355	0	0.00555
G1	ENSG00000272551	AC017048.3	lincRNA	0.332677	0.36389	0.061694	0.064596	0.356812	0.569711	0.021556	0.055168	0.152688	0.055729
G1	ENSG00000272610	MAGI1-IT1	sense_intronic	0.530015	0.76809	0.287885	0.164867	0.317954	0.237596	0.138171	0.22721	0.069904	0.050283
G1	ENSG00000272622	AC010735.2	lincRNA	1.70323	1.49671	1.57041	0.904205	1.7691	2.07509	1.34105	1.50773	1.22614	1.18877
G1	ENSG00000272630	AL731563.3	lincRNA	0.651675	0.766198	0.33293	0.237065	0.365957	0.341502	0.344991	0.38543	0.169883	0.171451
G1	ENSG00000272644	AC097468.3	lincRNA	3.52955	2.98473	1.9103	1.85973	2.68401	2.06763	2.93676	3.14765	1.4211	2.34346
G1	ENSG00000272677	AC124016.1	antisense	2.19652	2.06899	1.18041	1.25856	0.996773	1.1615	0.523479	0.465003	0.279375	0.288946
G1	ENSG00000272686	AC006333.2	antisense	3.90668	3.41385	1.77394	1.62731	1.2128	1.53127	0.735637	0.617746	1.17711	1.24498
G1	ENSG00000272716	AL121658.1	lincRNA	4.24107	3.43615	2.49851	2.84092	1.3444	1.41648	1.42415	1.65354	1.26647	0.902799
G1	ENSG00000272758	AC083798.2	antisense	5.49642	5.22694	3.26928	3.35347	3.74596	2.45273	2.20069	2.3326	1.10612	1.47141
G1	ENSG00000272812	AC004908.2	sense_intronic	1.94561	2.26009	1.38871	1.0157	0.985063	1.02129	1.27219	0.894991	0.011115	0.414841
G1	ENSG00000272842	AL391834.1	antisense	0.724236	0.850569	0	0.02405	0.227364	0.302875	0.231061	0.106625	0.323905	0.189738
G1	ENSG00000272906	AL353708.3	lincRNA	3.18359	2.44567	1.55035	1.40355	1.47729	1.28425	1.33707	1.48125	1.01135	1.23315
G1	ENSG00000272910	AC090425.2	antisense	0.634338	0.506536	0.383053	0.140907	0.316191	0.208344	0.223567	0.173738	0.144975	0.236716
G1	ENSG00000272936	AC096586.1	antisense	0.615391	1.15788	0.25412	0.136954	0.395299	0.557259	0.411122	0.855075	0.146917	0.146608
G1	ENSG00000272994	AC012360.3	lincRNA	6.8871	6.50941	3.93338	3.515	4.28563	4.10149	4.56802	4.28952	2.55888	2.72567
G1	ENSG00000273063	AC007250.1	antisense	0.83915	1.19617	0.667301	0.651447	0.270413	0.452531	0.330436	0.467019	0.156972	0.394136
G1	ENSG00000273066	AL355987.4	processed_transcript	7.26282	6.82091	2.20143	1.82562	1.55267	2.33308	2.39475	2.39965	2.62289	3.01192
G1	ENSG00000273084	AC092171.5	lincRNA	0.323976	0.304939	0.085593	0	0.030326	0.037647	0	0.028723	0.024657	0.02692
G1	ENSG00000273106	AC019129.2	antisense	0.245146	0.163946	0.129845	0.039083	0.122675	0.174437	0.083744	0.057186	0.01887	0.094933
G1	ENSG00000273204	AC104506.1	antisense	8.27084	5.13343	3.5541	3.83955	5.02662	4.98074	2.79986	3.90228	2.06119	1.89176
G1	ENSG00000273319	AC058791.1	lincRNA	0.068991	0.04515	0	0	0.020353	0.027915	0.019876	0.023461	0.017319	0.005604
G1	ENSG00000273320	AC007032.1	antisense	2.39617	2.22252	1.01911	1.33279	1.08844	1.54945	0.80018	0.756503	1.05223	0.972535
G1	ENSG00000273328	AC099329.2	processed_transcript	0.188286	0.128809	0.010148	0.086215	0.074103	0.084327	0.075186	0.059833	0.019329	0
G1	ENSG00000273355	AP000894.4	lincRNA	1.96225	1.95206	1.54185	1.23252	1.12918	0.955009	0.836966	0.870298	1.30145	1.09118
G1	ENSG00000273356	LINC02019	lincRNA	1.48741	1.17093	0.348187	0.070951	0.520051	0.53404	0.679557	0.404942	0.694259	1.04419
G1	ENSG00000273381	AL158071.4	lincRNA	0.121312	0.144976	0.06084	0.092625	0.102304	0.093524	0.058048	0.085494	0.045008	0.010984
G1	ENSG00000273387	AC005005.3	antisense	0.982167	1.49924	0.374722	0.593306	1.47242	1.08074	0.46142	0.518639	0.326098	0.261358
G1	ENSG00000273394	AC128687.2	antisense	0.843274	0.841694	0.270932	0.534831	0.326262	0.380765	0.234226	0.385193	0.28067	0.187279
G1	ENSG00000273442	AC006946.3	lincRNA	0.16307	0.289804	0.02271	0.083814	0.148039	0.088886	0.079753	0.160025	0.049835	0.079945
G1	ENSG00000273448	AC006480.2	lincRNA	1.44677	1.15999	1.09072	0.832537	1.23167	0.851848	1.20567	1.48296	0.187755	0.208763
G1	ENSG00000273449	AC093788.1	lincRNA	1.83336	1.52849	1.22206	0.89824	0.877238	1.09977	0.928795	1.26093	0.474973	0.521036
G1	ENSG00000273485	AL139339.2	antisense	1.83074	1.97017	1.00039	0.392789	1.13843	0.897689	1.18251	1.04648	1.11072	0.956454
G1	ENSG00000273542	HIST1H4K	protein_coding	22.4376	22.3335	5.80997	5.19088	5.362	4.96283	5.11072	4.53883	8.47614	8.70976
G1	ENSG00000273568	AC131009.3	sense_intronic	9.08775	9.58612	4.10663	4.32327	7.99893	6.64594	7.28701	11.2084	4.64168	5.63754
G1	ENSG00000273669	AC015819.1	lincRNA	1.03859	0.980106	0.321045	0.391688	0.419355	0.384545	0.63384	0.577021	0.539436	0.275644
G1	ENSG00000273680	AC009318.2	antisense	0.785899	0.694182	0.51737	0.420568	0.45335	0.583059	0.454014	0.427887	0.144982	0.242161
G1	ENSG00000273711	AC005520.5	antisense	1.67599	1.64553	1.27824	1.03534	0.733013	0.853635	0.701038	0.959833	1.17606	0.727656
G1	ENSG00000273729	AC007686.3	antisense	1.12476	1.09043	0.41726	0.534158	0.660483	0.738292	0.435916	0.392501	0.224445	0.27714
G1	ENSG00000273742	MIR6075	miRNA	1.65986	3.11751	0	0.342529	0.225072	0.106407	0.200722	0.220129	0.128379	0.471584
G1	ENSG00000273797	AL133445.2	sense_intronic	0.705657	0.498607	0.233161	0.077869	0.078261	0.047168	0.094077	0.042988	0.083578	0.131205
G1	ENSG00000273820	USP27X	protein_coding	14.0819	13.9857	8.2297	7.88613	9.24624	9.99888	7.03898	7.88899	9.15988	9.09703
G1	ENSG00000273888	FRMD6-AS1	antisense	1.13118	1.09134	0.891695	0.902983	0.765483	0.627883	0.659247	0.51123	0.351606	0.407136
G1	ENSG00000273893	AL133520.1	sense_intronic	1.47151	1.55955	0.515568	1.16344	1.12638	0.781112	0.97198	0.532633	0.987556	0.866183
G1	ENSG00000273989	AC022079.1	sense_intronic	0.827215	0.499968	0.076598	0.042642	0.16577	0.205906	0.090049	0.24606	0.050971	0.027802
G1	ENSG00000274015	AL136038.5	lincRNA	1.87374	2.18315	0.9787	0.638382	1.10848	1.34891	1.37106	1.07207	0.508997	0.625763
G1	ENSG00000274021	AC024909.2	antisense	0.120286	0.137409	0	0	0	0.009398	0	0.021619	0.01776	0.011198
G1	ENSG00000274104	AC020910.4	lincRNA	2.10287	2.09226	0.949476	0.85167	1.17022	1.15188	1.05415	0.51754	0.460911	0.374746
G1	ENSG00000274105	AC084824.3	sense_intronic	1.28721	1.04827	0.453637	0.52597	0.577174	0.459202	0.681021	0.889129	0.063071	0.416228
G1	ENSG00000274184	AC011815.2	lincRNA	0.86769	0.965302	0.815524	0.671906	0.449206	0.449629	0.447365	0.50108	0.197913	0.301352
G1	ENSG00000274267	HIST1H3B	protein_coding	3.1006	3.21581	0.207987	0.591161	0.722199	0.849141	0.542387	0.534923	0.649615	0.247212
G1	ENSG00000274286	ADRA2B	protein_coding	0.254361	0.308009	0.164442	0.119188	0.326768	0.394011	0.133524	0.048431	0.060767	0.075853
G1	ENSG00000274290	HIST1H2BE	protein_coding	1.92199	1.92405	0.542415	0.379162	0.512878	0.66659	0.497575	0.484623	0.432056	0.669648
G1	ENSG00000274292	AC084018.2	lincRNA	0.280248	0.192316	0.086888	0.122193	0.223142	0.185484	0.09237	0.186009	0.109893	0.072921
G1	ENSG00000274340	AC032011.1	lincRNA	0.272207	0.1913	0.094414	0.103344	0.325489	0.211771	0.110968	0.141222	0.067351	0.144611
G1	ENSG00000274425	AC114271.1	antisense	2.49529	2.52213	1.72673	1.71615	2.40577	2.38408	1.24105	1.3724	1.15046	1.42741
G1	ENSG00000274598	AC087893.1	sense_intronic	0.399066	0.22145	0.144578	0.162266	0.352598	0.282952	0.128683	0.194215	0.071832	0.149836
G1	ENSG00000274649	AL512624.1	processed_pseudogene	3.64391	3.63312	2.40275	1.40128	1.47332	1.24869	1.7709	2.02628	0.666263	0.749613
G1	ENSG00000274712	AC005332.4	lincRNA	6.12849	5.71002	4.91904	4.38313	3.00065	3.07743	3.15367	2.85511	3.51678	3.54622
G1	ENSG00000274828	AC068473.5	lincRNA	8.02282	7.16661	5.91035	5.97034	3.9613	3.02209	3.50574	4.16946	3.61977	3.54305
G1	ENSG00000274911	AL627230.2	unprocessed_pseudogene	9.60591	11.261	7.31202	7.29851	8.84422	10.5834	7.52705	5.79425	3.09232	2.5333
G1	ENSG00000274943	AC079684.1	sense_intronic	3.57504	2.96459	1.27138	0.771517	1.4217	0.928689	0.666788	1.11848	0.606166	0.435799
G1	ENSG00000274997	HIST1H2AH	protein_coding	1.05308	1.10882	0.27361	0.249914	1.1067	0.892166	0.82098	0.509083	0.323172	0.31147
G1	ENSG00000275029	HMGB1P24	transcribed_processed_pseudogene	0.444474	0.346622	0.045766	0.060076	0.196024	0.137498	0.213645	0.688712	0.257851	0.160915
G1	ENSG00000275055	AC011468.5	antisense	5.30214	5.41341	3.02949	3.30623	1.0511	1.0314	1.32842	1.27844	2.19336	2.73206
G1	ENSG00000275084	SNORD91B	snoRNA	1.5347	2.20255	0.45157	0.274023	0.835499	2.09771	1.58188	0.772895	0.972231	0.264697
G1	ENSG00000275092	AL031710.2	sense_intronic	1.76263	1.62779	0.629027	0.529534	0.341283	0.331201	0.597826	0.994695	0.305777	0.276301
G1	ENSG00000275111	ZNF2	protein_coding	6.65707	6.10246	5.66071	4.8439	4.95464	4.91369	5.66021	6.26917	2.99657	4.11671
G1	ENSG00000275120	AC048382.5	antisense	0.055303	0.101482	0.055496	0.028125	0.022316	0.035559	0.065323	0.103141	0.00949	0.027546
G1	ENSG00000275221	HIST1H2AK	protein_coding	3.2825	3.23256	1.81398	1.63161	2.3089	1.92217	2.43781	2.46828	1.15297	1.4114
G1	ENSG00000275322	AC103746.1	lincRNA	0.943315	0.931722	0.133058	0.164345	0.441008	0.616131	0.316138	0.334152	0.145696	0.110194
G1	ENSG00000275454	AC105020.6	antisense	0.186499	0.236601	0.018908	0.060012	0.120295	0.119146	0.089534	0.044993	0.057128	0.041466
G1	ENSG00000275693	RF02116	misc_RNA	1.15485	1.67225	0.457896	1.64562	0.312508	0.821754	0.273477	0.933388	0.173641	0.135744
G1	ENSG00000275708	MIR3648-1	miRNA	34.3921	33.4728	25.4606	26.6226	26.9319	18.4252	18.9561	19.72	13.6414	14.7954
G1	ENSG00000275714	HIST1H3A	protein_coding	1.45667	1.26812	0.292188	0.228063	0.789266	0.865067	0.499305	0.829276	0.627501	0.645384
G1	ENSG00000275854	AC084824.4	sense_intronic	0.758859	0.675102	0.362377	0.384211	0.637264	0.249933	0.640216	0.714816	0.258549	0.193573
G1	ENSG00000275859	MIR6720	miRNA	0.532618	2.42651	0.892452	0.089467	1.44268	1.90488	1.06184	0.531603	0.202924	0.604643
G1	ENSG00000275894	AL021578.1	sense_intronic	3.00847	2.81726	0.689305	1.15913	0.887143	1.40905	0.383831	0.721602	0.71809	0.709378
G1	ENSG00000275895	U2AF1L5	protein_coding	160.335	147.76	105.205	109.338	103.476	113.722	95.3196	108.408	190.134	177.321
G1	ENSG00000275896	PRSS2	protein_coding	0.696501	1.07708	0.307698	0.341135	0.370061	0.16221	0.19839	0.168398	0.178768	0.155679
G1	ENSG00000276058	STMN1P1	processed_pseudogene	3.24661	4.22179	1.1524	0.933478	0.667141	0.516731	0.98129	0.597432	0.37552	0.467024
G1	ENSG00000276180	HIST1H4I	protein_coding	5.26173	4.62595	1.06218	0.931697	0.683402	0.67362	0.601797	0.391335	1.00218	1.04629
G1	ENSG00000276259	AC009118.3	antisense	1.58748	1.87791	0.469411	0.643909	0.957377	0.892833	0.467536	0.737287	0.307345	0.40454
G1	ENSG00000276524	AC010999.2	lincRNA	0.840014	0.550531	0.395293	0.414943	0.373534	0.381479	0.21619	0.27393	0.167354	0.158705
G1	ENSG00000276564	AC130650.2	lincRNA	0.641141	0.777572	0.238278	0.201204	0.32934	0.285912	0.216521	0.1405	0.195255	0.207401
G1	ENSG00000276573	AL442067.1	sense_intronic	0.447747	0.560541	0.206378	0.049451	0.250936	0.591151	0.212145	0.134251	0.148048	0.128121
G1	ENSG00000276603	AL109614.1	sense_intronic	6.84765	7.69892	0.411894	0.940353	1.1643	0.824029	1.18802	1.2692	0.62924	0.627211
G1	ENSG00000276728	AC142472.1	lincRNA	2.9274	2.49569	1.416	1.28122	2.88214	2.33773	3.46991	2.2212	1.71056	1.6935
G1	ENSG00000276744	AC105137.2	sense_intronic	1.4323	0.961356	0.910291	1.15724	0.728482	0.79379	0.375984	0.716052	0.099835	0.121554
G1	ENSG00000276786	BX640515.1	lincRNA	1.53289	1.18534	0.059066	0.156354	0.178157	0.172076	0.400202	0.385094	0.126183	0.033656
G1	ENSG00000276853	AC026124.2	sense_intronic	1.38252	1.23925	0.323664	0.235619	0.32115	0.506757	0.453737	0.523202	0.336186	0.383339
G1	ENSG00000276900	AC023157.3	antisense	9.68375	9.57743	6.46056	5.98463	7.49933	6.81311	4.81016	5.49632	2.41375	2.49681
G1	ENSG00000276966	HIST1H4E	protein_coding	7.60083	7.0209	0.699755	0.788766	1.50682	1.15917	2.11508	1.96375	1.40485	1.53039
G1	ENSG00000277157	HIST1H4D	protein_coding	8.67582	6.19414	0.17747	0.205984	1.09672	1.03971	2.11961	1.59423	0.464845	0.711996
G1	ENSG00000277170	AC012676.3	sense_intronic	1.32367	1.12983	1.10529	0.798221	1.20343	0.715794	1.19939	1.49242	0.253155	0.267176
G1	ENSG00000277173	AC004241.4	sense_intronic	0.369614	0.383279	0.238362	0.360267	0.418427	0.220461	0.41518	0.289328	0.018727	0.080907
G1	ENSG00000277224	HIST1H2BF	protein_coding	6.016	6.6851	0.487015	0.485579	2.66916	3.26859	1.94642	1.50748	1.14996	0.643723
G1	ENSG00000277342	AC048344.4	sense_intronic	4.97484	4.66982	2.75751	2.69419	3.62526	4.20499	2.71616	2.74534	2.18747	1.71994
G1	ENSG00000277352	AP001065.2	lincRNA	3.03581	2.65741	2.60743	1.72776	1.45838	1.99628	2.44971	3.01016	0.742064	0.381428
G1	ENSG00000277367	AL929601.4	processed_pseudogene	7.92679	7.11405	4.34098	3.07249	4.43698	3.48975	5.1837	5.30486	1.50262	1.36556
G1	ENSG00000277423	AC069234.5	lincRNA	0.713837	0.72081	0.276144	0.454772	0.539394	0.384811	0.493741	0.436333	0.356663	0.225547
G1	ENSG00000277462	ZNF670	protein_coding	9.98032	9.74815	4.9808	4.91763	4.85592	5.26469	4.22383	4.62355	4.67143	4.60395
G1	ENSG00000277586	NEFL	protein_coding	40.4157	41.8457	25.4956	21.0663	28.0744	30.2021	31.5243	26.3017	19.0567	29.9109
G1	ENSG00000277589	AC244093.4	sense_intronic	1.65997	0.976286	0.323067	0.291029	0.331274	0.268339	0.186689	0.349763	0.30417	0.332139
G1	ENSG00000277693	AP003900.1	lincRNA	19.6564	17.5693	12.6781	11.612	10.8885	12.8173	7.28991	8.60089	9.06718	9.91313
G1	ENSG00000277738	AC126175.1	lincRNA	0.869788	0.867013	0.062613	0.07286	0.392226	0.768347	0.418316	0.526605	0.179959	0.196826
G1	ENSG00000277945	AC107308.1	sense_intronic	2.45483	1.85691	0.424053	0.085585	0.864366	0.743793	0.583733	1.64121	0	0.082283
G1	ENSG00000278022	AC118658.1	sense_intronic	1.47441	1.1164	0.230691	0.644421	0.200657	0.134486	0.117905	0.03457	0.092067	0.336239
G1	ENSG00000278058	AC009159.3	lincRNA	0.297311	0.458771	0.222929	0.067455	0.362309	0.169116	0.050822	0.073011	0.028696	0.012301
G1	ENSG00000278156	TSC22D1-AS1	antisense	1.37384	1.23696	0.650961	0.638183	0.794773	0.825221	0.83146	0.622625	0.128167	0.156979
G1	ENSG00000278384	AL354822.1	protein_coding	1.34253	1.06625	0.808053	0.624199	0.536278	0.440528	0.801269	0.85627	0.619112	0.627502
G1	ENSG00000278576	AL162171.3	sense_intronic	0.68309	0.647215	0.375982	0.346171	0.350251	0.341625	0.416813	0.427402	0.223023	0.171689
G1	ENSG00000278743	AC087239.1	lincRNA	2.00797	2.06153	1.45061	1.11454	1.02987	1.20839	1.2868	1.09214	0.351197	0.342403
G1	ENSG00000278828	HIST1H3H	protein_coding	10.6998	10.1847	1.13758	0.583769	2.04125	2.38023	1.48661	1.44891	2.04786	1.8591
G1	ENSG00000278889	OR2S2	protein_coding	0.448307	0.461224	0.212103	0.13934	0.304185	0.224278	0.251074	0.37459	0.074788	0.087032
G1	ENSG00000279048	AC080080.1	TEC	0.760965	0.627003	0.379421	0.509618	0.303003	0.234946	0.355069	0.366199	0.114372	0.113521
G1	ENSG00000279075	AC091965.5	TEC	2.6679	2.83009	2.27189	1.85642	2.81673	2.31372	2.98428	2.54054	0.33821	0.183394
G1	ENSG00000279089	AC005839.1	TEC	1.01775	1.04955	0.740556	0.604088	1.04797	0.739118	1.10221	1.3275	0.365391	0.349402
G1	ENSG00000279092	AC025678.3	TEC	2.04694	1.98358	0.667896	0.465764	0.51042	0.494902	0.39341	0.51181	0.538087	0.532031
G1	ENSG00000279098	AC097460.3	TEC	0.301258	0.129506	0.049214	0	0.048063	0.003374	0.33178	0.067026	0.040774	0.043986
G1	ENSG00000279122	AC020763.2	TEC	0.214699	0.24328	0.064461	0.161477	0.043543	0.077246	0.077852	0.164877	0.04958	0.020206
G1	ENSG00000279133	AC018628.1	TEC	1.41688	1.19031	0.458235	0.253495	0.805871	0.607084	0.510877	0.526659	0.314922	0.305315
G1	ENSG00000279138	AP002847.1	TEC	0.351715	0.351564	0.19555	0.135323	0.24109	0.104486	0.177076	0.253712	0.081453	0.020295
G1	ENSG00000279145	AC011912.1	lincRNA	0.247471	0.263442	0.110892	0.07574	0.184076	0.211935	0.114139	0.089616	0.165186	0.158039
G1	ENSG00000279164	AL118508.3	TEC	0.083995	0.161129	0.014254	0.007313	0.129804	0.127192	0.072926	0.095876	0.012444	0
G1	ENSG00000279253	AL121753.2	TEC	3.84949	3.87136	1.03704	0.814371	0.925443	1.00223	0.829532	1.11208	0.453046	0.582853
G1	ENSG00000279349	AC092692.1	TEC	0.320017	0.278376	0.211504	0.179194	0.243701	0.227883	0.143815	0.188636	0.076065	0.103031
G1	ENSG00000279432	AC015799.1	TEC	0.266323	0.195976	0.160311	0.128636	0.173564	0.128639	0.178203	0.214582	0.069446	0.069909
G1	ENSG00000279476	AC092139.3	TEC	0.070639	0.076634	0.063346	0.017858	0.075959	0.116813	0.088983	0.056529	0.035288	0.02744
G1	ENSG00000279481	AC104791.2	TEC	0.107798	0.117642	0.019579	0.021443	0.035236	0.046958	0.160784	0.123105	0.026458	0.059991
G1	ENSG00000279528	AC115618.3	TEC	8.3888	7.4685	3.59422	3.41471	6.12329	6.21929	6.27621	6.87778	5.42606	4.65388
G1	ENSG00000279568	AC093525.9	TEC	2.47832	3.01479	0.59235	0.387236	0.875433	1.05838	1.13777	1.3606	0.598518	0.610441
G1	ENSG00000279583	AC009086.3	TEC	4.37798	5.30819	0.375511	0.020173	0.604117	0.347086	0.553375	0.695909	0.583152	0.021478
G1	ENSG00000279584	AC005593.1	TEC	0.364778	0.326588	0.140678	0.052479	0.003555	0.110048	0.052719	0.196264	0	0.048748
G1	ENSG00000279608	AL353795.3	TEC	0.214736	0.177532	0.131438	0.085032	0.198828	0.165251	0.152782	0.146058	0.067767	0.078955
G1	ENSG00000279613	AC124283.5	TEC	0.353227	0.503932	0.218631	0.255929	0.281305	0.256772	0.061322	0.10039	0.112851	0.069904
G1	ENSG00000279637	AC018445.3	TEC	0.403189	0.48145	0.020704	0.031509	0.149128	0.155364	0.103828	0.105113	0.053918	0.077532
G1	ENSG00000279649	AC020978.9	TEC	0.217294	0.204181	0.049601	0.076049	0.166734	0.173591	0.141174	0.150233	0.076498	0.027916
G1	ENSG00000279667	AL603839.4	TEC	2.43604	3.14877	1.32532	0.704139	1.96157	1.82015	0.846048	1.04278	1.03328	1.14623
G1	ENSG00000279685	MAPT-IT1	sense_intronic	0.063561	0.082146	0.008941	0.008901	0.015221	0	0	0	0.022357	0.008352
G1	ENSG00000279691	AC113410.3	TEC	4.82748	5.55969	1.33768	1.56111	0.960213	1.1645	2.07863	2.14933	1.88081	2.78155
G1	ENSG00000279696	AP001273.1	TEC	1.06245	0.957664	0.363485	0.271151	1.00231	0.960593	0.46539	0.631572	0.433213	0.489456
G1	ENSG00000279738	AL022311.1	sense_overlapping	0.453483	0.504962	0.305155	0.224594	0.451917	0.412054	0.335337	0.444913	0.185424	0.249338
G1	ENSG00000279861	AC073548.1	TEC	2.33554	1.84568	1.26022	0.992063	0.966083	0.791869	1.03764	1.51735	0.711182	0.831437
G1	ENSG00000279865	AC006511.3	TEC	1.27997	1.03436	0.715771	0.668619	0.501601	0.442868	0.411928	0.451862	0.294999	0.229419
G1	ENSG00000279962	AP001525.1	TEC	1.83281	1.89651	0.426965	0.258912	1.87817	0.609847	0.335509	0.68557	0.110598	0.465269
G1	ENSG00000280010	AP001350.2	TEC	2.55587	2.54557	0.690094	0.760792	1.01923	1.26991	0.803697	1.40305	0.972228	0.9683
G1	ENSG00000280046	AC104581.4	TEC	0.631267	0.58051	0.286359	0.194507	0.373169	0.438551	0.488393	0.453422	0.243091	0.273456
G1	ENSG00000280219	AC093908.1	TEC	0.244175	0.223199	0.167556	0.130826	0.21957	0.175986	0.115995	0.14199	0.022752	0.031599
G1	ENSG00000280231	AL031719.2	TEC	1.37435	1.24573	0.610444	0.338387	0.212568	0.488861	0.378208	0.512622	0.352587	0.375873
G1	ENSG00000280287	AC131212.3	TEC	1.21197	1.22603	0.18297	0.11807	0.262249	0.046741	0.279532	0.280813	0.236838	0.235516
G1	ENSG00000280453	AP006248.5	TEC	0.568159	0.295197	0.07238	0.127533	0.071793	0.104901	0.063627	0.129628	0.180642	0.148579
G1	ENSG00000280987	MATR3	protein_coding	30.0721	25.8105	15.0509	16.096	11.929	15.7237	15.0452	15.0497	30.4481	29.21
G1	ENSG00000281026	N4BP2L2-IT2	sense_intronic	0.444724	0.468268	0.395375	0.327658	0.336849	0.283394	0.410303	0.581364	0.20094	0.16064
G1	ENSG00000281347	NF1P9	transcribed_unprocessed_pseudogene	5.57815	5.9786	2.08593	1.97052	5.09103	4.09308	5.21482	5.54708	1.43553	1.20135
G1	ENSG00000281756	C2-AS1	antisense	0.730141	1.07452	0.308177	0.03545	0.128547	0.023922	0.143116	0.239879	0.129265	0.19782
G1	ENSG00000281912	LINC01144	lincRNA	1.75698	2.13139	0.763464	0.789613	0.820634	0.53092	0.602136	0.623805	0.437207	0.41584
G1	ENSG00000282100	HSP90AB4P	processed_pseudogene	0.215866	0.199761	0.028883	0.060288	0.138846	0.054063	0.045473	0.030243	0.043809	0.106494
G1	ENSG00000282164	PEG13	sense_intronic	0.92797	0.982663	0.382108	0.431454	0.471575	0.231224	0.209329	0.144041	0.080184	0.071079
G1	ENSG00000282988	AL031777.3	protein_coding	20.0653	18.5746	1.37294	0.627647	4.31356	3.62682	9.52486	5.89621	2.45818	2.56702
G1	ENSG00000283122	HYMAI	sense_overlapping	1.9042	1.91166	0.746258	0.727248	0.869324	0.812713	0.836463	0.95973	0.620415	0.569146
G1	ENSG00000283204	MIR4434	miRNA	0.730498	0.362031	0.156031	0	0.04497	0.259517	0	0.134984	0.073285	0.055821
G1	ENSG00000283566	AC243725.1	unprocessed_pseudogene	0.42566	0.366797	0	0	0.160036	0	0	0	0.186008	0
G1	ENSG00000283696	AL592295.4	lincRNA	1.02948	0.803697	0.482183	0.544906	0.418492	0.235699	0.132887	0.329095	0.374155	0.354948
G1	ENSG00000283740	TAF11L11	protein_coding	0.566654	0.519262	0.170569	0.254987	0.372196	0.459543	0.164148	0.376175	0.123197	0.073268
G1	ENSG00000284196	AL158064.1	processed_transcript	0.122924	0.036713	0	0	0.014933	0.058744	0.042311	0	0	0
G1	ENSG00000284697	AC006511.5	processed_transcript	0.598382	0.595485	0.205698	0	0.306143	0.253549	0.246633	0.761563	0.248484	0.477495
G1	ENSG00000284753	EEF1AKMT4	protein_coding	14.2755	14.0346	5.37072	5.10544	6.0365	5.99362	6.28795	6.95777	6.4623	8.061
G1	ENSG00000284834	AC183088.2	unprocessed_pseudogene	0.13414	0.298528	0.028406	0.00115	0.130313	0.014234	0.161866	0.10524	0	0.012195
G1	ENSG00000284930	AC005280.2	lincRNA	0.717319	1.15091	0.318797	0.148728	0.305455	0.573249	0.45077	0.656496	0.01082	0.04376
G1	ENSG00000284977	AL160272.1	lincRNA	0.13246	0.183323	0.148887	0.126442	0.095021	0.177244	0.261927	0.349247	0.070806	0.036148
G1	ENSG00000285053	TBCE	protein_coding	32.2903	34.4001	20.4437	23.2883	16.1892	17.5739	19.054	21.5913	37.6272	21.842
G1	ENSG00000285278	TFAP2A-AS2	antisense	1.46532	1.36525	0.988813	1.01428	1.06896	0.973331	0.685076	0.739275	0.446006	0.450395
G1	ENSG00000285410	GABPB1-IT1	sense_intronic	6.05512	5.88025	4.62722	4.71554	3.53301	3.44678	2.79076	2.75675	3.49883	4.03395
G1	ENSG00000285525	AC099670.3	lincRNA	0.157522	0.160225	0	0.057532	0.188799	0.120915	0.057153	0.124888	0	0
G1	ENSG00000285531	Z83840.1	processed_pseudogene	18.1834	18.5911	7.85322	7.81656	9.11441	11.0109	9.70161	13.9231	10.452	8.6019
G1	ENSG00000285641	AL358472.6	protein_coding	9.47038	10.8951	7.99876	7.87279	7.57206	6.76211	7.1527	7.86082	6.64148	8.4406
G1	ENSG00000285721	AL031281.2	protein_coding	0.672423	0.855994	0.313503	1.50867	1.51216	1.53198	0.707799	1.20757	0.424628	0.705583
G1	ENSG00000285722	AC207130.1	lincRNA	43.5341	46.5918	12.7444	12.1652	31.1882	38.8986	31.3764	36.1559	6.72207	6.69879
G1	ENSG00000285793	AC125232.2	processed_transcript	18.9476	19.0644	15.7179	16.881	13.0504	14.4626	13.8778	15.1886	19.1677	19.832
G1	ENSG00000285976	AL135905.2	protein_coding	33.1044	35.6152	16.1368	28.5323	27.1117	28.7352	19.6995	21.175	16.156	17.4207
G1S	ENSG00000003400	CASP10	protein_coding	0.267281	0.172173	1.32793	1.47011	1.03372	1.22765	1.10067	0.745679	0.27915	0.238347
G1S	ENSG00000004777	ARHGAP33	protein_coding	2.11794	2.281	17.7677	14.4556	8.78034	9.35164	12.4979	11.5111	6.74859	8.94682
G1S	ENSG00000004846	ABCB5	protein_coding	0.027568	0.032881	0.216311	0.201934	0.10817	0.146204	0.060645	0.061436	0.038179	0.058302
G1S	ENSG00000005108	THSD7A	protein_coding	0.002764	0.00573	0.073019	0.099897	0.031614	0.021276	0.043399	0.033035	0.034677	0.019002
G1S	ENSG00000005187	ACSM3	protein_coding	0.822375	1.10419	1.7433	1.74649	1.06202	0.978586	1.64364	1.02822	1.44837	1.09127
G1S	ENSG00000005469	CROT	protein_coding	3.43374	3.26908	10.3842	8.9695	6.08327	5.96339	4.5289	5.17669	3.86634	4.29366
G1S	ENSG00000005961	ITGA2B	protein_coding	0.030711	0.091262	0.70862	0.635481	0.513146	0.361945	0.613961	0.516959	0.204832	0.526903
G1S	ENSG00000006740	ARHGAP44	protein_coding	1.75414	2.00279	4.81703	5.0867	2.92107	3.24996	2.61102	3.12338	2.74709	2.9941
G1S	ENSG00000007171	NOS2	protein_coding	0.901469	0.865928	3.15929	3.36973	1.56462	1.68996	0.817381	0.782768	0.881851	0.98967
G1S	ENSG00000007968	E2F2	protein_coding	5.64909	5.13787	11.2679	11.2614	4.92579	3.95375	3.99676	3.92407	5.2381	5.69398
G1S	ENSG00000011638	TMEM159	protein_coding	5.97286	5.39485	12.4893	10.954	5.53675	7.04946	6.09988	6.64597	6.19025	7.40733
G1S	ENSG00000013392	RWDD2A	protein_coding	1.18586	1.01716	3.23886	2.943	1.86808	1.91797	1.15068	1.20226	0.765716	0.714389
G1S	ENSG00000014138	POLA2	protein_coding	11.7015	12.0629	47.7166	41.7378	30.6904	31.4176	21.4435	22.8656	17.4935	17.422
G1S	ENSG00000018625	ATP1A2	protein_coding	0.181407	0.152213	3.8684	3.53317	1.63478	1.63723	0.813382	0.727068	0.380406	0.377508
G1S	ENSG00000019485	PRDM11	protein_coding	6.32643	7.22962	14.0197	16.3454	9.59308	9.67872	8.19809	8.70521	12.2218	11.8063
G1S	ENSG00000030419	IKZF2	protein_coding	2.97156	2.29421	5.40652	5.56589	3.46245	3.23163	2.14617	1.8335	1.34779	0.755861
G1S	ENSG00000033122	LRRC7	protein_coding	0.2435	0.196995	1.01417	0.685653	0.388386	0.426952	0.196569	0.172343	0.140458	0.137847
G1S	ENSG00000033327	GAB2	protein_coding	6.52656	6.55565	12.6157	13.0676	7.87314	7.9391	6.83134	7.19029	9.1885	9.51267
G1S	ENSG00000033627	ATP6V0A1	protein_coding	0.475712	0.714278	1.76358	1.13659	0.761142	1.20322	0.911669	0.875116	0.214325	0.409007
G1S	ENSG00000036672	USP2	protein_coding	0.185513	0.168217	1.11882	0.891406	0.662802	0.966979	0.119779	0.222816	0.083718	0.040249
G1S	ENSG00000040608	RTN4R	protein_coding	6.72732	7.35129	29.4219	21.3336	14.5331	17.4472	12.1393	9.82476	10.276	12.1272
G1S	ENSG00000040731	CDH10	protein_coding	0.844682	0.306185	1.44581	1.57873	0.781644	0.586075	0.925627	0.911645	0.134327	0.225048
G1S	ENSG00000047648	ARHGAP6	protein_coding	0.225047	0.442241	1.23591	1.4671	0.777186	0.787276	0.668018	0.769591	0.593667	0.634028
G1S	ENSG00000049283	EPN3	protein_coding	0.359674	0.46249	2.22438	2.39636	0.817082	0.695125	0.585795	0.627418	0.192731	0.063948
G1S	ENSG00000050030	NEXMIF	protein_coding	0.066823	0.058588	0.468045	0.836699	0.215464	0.2458	0.088812	0.110925	0.064244	0.105111
G1S	ENSG00000050426	LETMD1	protein_coding	18.6925	18.3701	46.5893	44.6461	30.119	27.0851	37.3588	42.3728	20.4469	21.1095
G1S	ENSG00000051523	CYBA	protein_coding	0.02167	0.034751	1.03575	0.835021	0.366861	0.244293	0.712465	0.667878	0.37052	0.124871
G1S	ENSG00000052850	ALX4	protein_coding	0.091558	0.126382	0.499836	0.474242	0.22081	0.204797	0.133956	0.158048	0.059187	0.128577
G1S	ENSG00000053108	FSTL4	protein_coding	0.352318	0.45616	1.59563	0.918712	0.499637	0.561168	0.208275	0.37426	0.102499	0.240214
G1S	ENSG00000056736	IL17RB	protein_coding	0.803927	1.04102	4.80678	5.47212	3.61193	3.69483	1.93822	1.76228	0.592259	0.953124
G1S	ENSG00000057294	PKP2	protein_coding	10.7479	10.7496	32.6167	32.6061	17.511	16.7688	12.7489	10.5859	18.7105	20.7471
G1S	ENSG00000059122	FLYWCH1	protein_coding	15.0022	12.0741	30.7273	32.4664	17.8706	16.3707	24.1039	21.3463	19.6951	22.0827
G1S	ENSG00000060140	STYK1	protein_coding	1.62095	1.7559	6.93447	6.20743	4.08726	4.43985	3.32404	3.65192	3.32308	3.42576
G1S	ENSG00000061337	LZTS1	protein_coding	1.13777	1.36894	7.17668	8.09916	2.56197	2.79745	1.69382	1.81601	1.27726	1.5512
G1S	ENSG00000061455	PRDM6	protein_coding	0.010132	0.012137	0.096105	0.203927	0.033931	0.027715	0.063347	0.116548	0.208751	0.061871
G1S	ENSG00000061918	GUCY1B1	protein_coding	1.32252	0.9119	2.87316	3.3689	1.90356	2.36946	0.973379	0.828169	1.72799	2.09849
G1S	ENSG00000063127	SLC6A16	protein_coding	1.77229	2.30323	5.99733	4.95089	3.64928	2.98669	4.2661	3.93931	2.79534	3.12932
G1S	ENSG00000064547	LPAR2	protein_coding	1.78948	1.80977	10.665	8.4163	5.47531	4.47391	4.9836	6.36748	3.15503	3.59037
G1S	ENSG00000064989	CALCRL	protein_coding	0.10627	0.061192	0.436933	0.539674	0.2604	0.306705	0.247255	0.131231	0.035584	0.019308
G1S	ENSG00000065060	UHRF1BP1	protein_coding	9.23954	9.02896	34.8946	39.6985	19.7356	20.2541	11.2036	11.3019	20.3442	21.7366
G1S	ENSG00000065357	DGKA	protein_coding	8.44242	8.91511	36.1056	28.8901	17.6458	21.116	14.0406	17.8609	10.8018	13.2988
G1S	ENSG00000065361	ERBB3	protein_coding	1.40267	1.57065	2.25575	2.63327	0.991822	1.4824	1.89221	1.48125	1.83101	1.81263
G1S	ENSG00000065413	ANKRD44	protein_coding	1.59303	1.36336	8.95303	7.85625	5.13567	4.83708	3.76439	3.46861	2.88988	3.04303
G1S	ENSG00000065609	SNAP91	protein_coding	0.065645	0.199611	1.62412	1.61893	1.17735	0.896323	0.156553	0.266204	0.143153	0.171244
G1S	ENSG00000066735	KIF26A	protein_coding	3.99997	3.90382	8.11902	9.1628	5.59216	4.68644	2.24484	2.58729	3.43176	4.03653
G1S	ENSG00000067842	ATP2B3	protein_coding	0.143354	0.267447	1.202	1.70513	0.645001	0.635636	0.470282	0.150557	0.362005	0.610765
G1S	ENSG00000068137	PLEKHH3	protein_coding	7.30287	7.34728	14.737	13.5725	5.72754	6.20003	4.24601	4.8667	5.63658	5.73445
G1S	ENSG00000068615	REEP1	protein_coding	0.980883	1.02275	10.0875	10.0895	5.85275	6.92385	2.63377	3.12845	1.41292	1.18264
G1S	ENSG00000068971	PPP2R5B	protein_coding	4.16069	3.89828	13.0413	11.1058	5.79561	5.53607	6.455	7.03556	6.72928	7.28914
G1S	ENSG00000070371	CLTCL1	protein_coding	6.9203	6.65944	28.3322	25.9115	17.2688	17.207	13.1289	13.8435	17.1208	16.891
G1S	ENSG00000070669	ASNS	protein_coding	90.8682	77.1768	177.15	193.71	162.522	166.415	109.587	111.039	92.4376	103.44
G1S	ENSG00000071073	MGAT4A	protein_coding	1.02468	1.10184	3.09157	3.10098	2.33982	1.3845	1.00761	0.805723	1.59277	1.16954
G1S	ENSG00000072135	PTPN18	protein_coding	42.5412	48.0492	94.1842	91.6861	59.5962	64.2915	55.2133	60.7413	51.078	55.9683
G1S	ENSG00000072201	LNX1	protein_coding	1.8677	2.49713	6.11889	8.05241	3.32142	3.26204	2.27199	2.11441	3.44471	3.47977
G1S	ENSG00000073146	MOV10L1	protein_coding	0.68399	0.840478	7.16678	6.53294	2.75516	2.59549	3.76917	4.23447	0.799087	0.96866
G1S	ENSG00000073350	LLGL2	protein_coding	0.369834	0.355962	2.05199	1.88097	0.836413	0.763937	0.584794	0.649263	0.687075	0.889309
G1S	ENSG00000074855	ANO8	protein_coding	1.73566	2.11163	10.1187	8.65382	4.72375	4.94817	4.36567	4.63728	3.42825	3.81368
G1S	ENSG00000074966	TXK	protein_coding	0.178061	0.046294	0.45432	0.471517	0.198479	0.268124	0.147913	0.219716	0.108569	0.089861
G1S	ENSG00000075303	SLC25A40	protein_coding	7.68081	9.86441	18.7413	21.8646	13.6858	12.1464	12.9233	12.6749	13.4416	12.4735
G1S	ENSG00000075651	PLD1	protein_coding	4.98584	4.77457	16.1762	15.6332	8.00053	7.95813	8.03519	7.69616	8.07468	7.74773
G1S	ENSG00000075891	PAX2	protein_coding	0.432605	0.486042	2.43738	2.16003	1.72958	1.32824	1.02733	1.01558	0.26991	0.403717
G1S	ENSG00000076555	ACACB	protein_coding	2.52068	2.12114	3.74198	4.42505	1.8304	2.05919	1.95657	1.28947	1.19046	1.10056
G1S	ENSG00000077092	RARB	protein_coding	0.299309	0.358245	1.59002	1.88579	1.16499	1.2041	0.535147	0.685955	0.129975	0.071287
G1S	ENSG00000078053	AMPH	protein_coding	12.9696	13.4855	40.3595	39.7676	21.1352	19.555	12.8733	13.0157	19.596	20.6377
G1S	ENSG00000078246	TULP3	protein_coding	19.0033	19.5133	50.3694	50.8436	27.4953	28.712	25.5195	24.6986	38.6119	41.3026
G1S	ENSG00000078900	TP73	protein_coding	1.56027	1.74212	11.921	10.9188	8.30772	6.76257	2.48048	2.5394	1.5583	1.63911
G1S	ENSG00000079102	RUNX1T1	protein_coding	0.056422	0.109722	0.273359	0.311112	0.108194	0.159221	0.083075	0.089869	0.005285	0.063254
G1S	ENSG00000080031	PTPRH	protein_coding	2.41848	2.81964	8.44205	10.4174	4.04893	5.86291	2.91302	3.92335	3.35576	4.4571
G1S	ENSG00000080947	CROCCP3	transcribed_unprocessed_pseudogene	2.90725	1.94775	5.66381	5.74182	4.03825	2.93899	5.13829	4.10894	2.28669	3.17129
G1S	ENSG00000082438	COBLL1	protein_coding	5.04627	4.36303	14.0273	11.6877	8.92659	9.69555	8.85472	6.17028	4.4861	4.93057
G1S	ENSG00000082556	OPRK1	protein_coding	0.060952	0.136053	0.43953	0.326419	0.115677	0.128873	0.119271	0.07472	0.153148	0.334641
G1S	ENSG00000083290	ULK2	protein_coding	0.701476	0.817024	2.97201	3.62838	2.00332	2.10919	1.26712	1.16383	1.0288	1.10422
G1S	ENSG00000084453	SLCO1A2	protein_coding	0.470019	0.288409	1.73896	1.53207	0.706792	0.981997	0.959113	0.698945	0.372257	0.309877
G1S	ENSG00000085552	IGSF9	protein_coding	4.24162	4.546	11.8747	9.16363	6.70899	5.21142	7.76002	6.98838	4.91272	5.10962
G1S	ENSG00000085741	WNT11	protein_coding	0.5398	0.598281	5.41071	5.76302	3.2598	2.06792	1.30429	1.17013	0.463105	1.38417
G1S	ENSG00000087258	GNAO1	protein_coding	7.03695	5.71142	11.5606	13.2612	8.21815	6.80347	4.54972	3.13797	8.71514	8.20488
G1S	ENSG00000088053	GP6	protein_coding	1.0475	1.14659	10.5675	11.6031	5.77976	5.02162	3.22657	2.98941	2.04431	2.5261
G1S	ENSG00000088538	DOCK3	protein_coding	0.613667	0.635498	3.03233	2.71975	1.5399	1.47975	1.77584	1.90268	2.09824	1.91173
G1S	ENSG00000088756	ARHGAP28	protein_coding	1.84391	1.79311	7.98308	7.45141	3.89352	4.41866	3.26146	2.94949	6.55332	6.6666
G1S	ENSG00000088899	LZTS3	protein_coding	8.84925	8.85413	31.1921	30.1863	15.6607	16.0173	4.40648	11.346	16.9736	18.7596
G1S	ENSG00000089041	P2RX7	protein_coding	0.179397	0.150651	0.747621	1.13773	0.78966	0.553891	0.67328	0.417761	0.076806	0.303297
G1S	ENSG00000089225	TBX5	protein_coding	0.250944	0.130055	0.375382	0.55723	0.248513	0.123406	0.063967	0.154877	0.02366	0.01295
G1S	ENSG00000090512	FETUB	protein_coding	0.142811	0.118791	0.440848	0.411325	0.089317	0.072418	0.086617	0.069742	0	0.030401
G1S	ENSG00000091262	ABCC6	protein_coding	0.240304	0.356077	2.73926	3.22486	0.833863	1.35561	0.919065	1.03328	0.256934	0.333729
G1S	ENSG00000092421	SEMA6A	protein_coding	1.16738	1.0515	8.00049	8.05487	4.01659	4.46061	3.11311	2.34672	0.602268	0.462232
G1S	ENSG00000095370	SH2D3C	protein_coding	0.143465	0.091689	1.85163	1.51876	0.39506	0.420743	0.355089	0.244125	0.198127	0.241448
G1S	ENSG00000099251	HSD17B7P2	transcribed_unprocessed_pseudogene	1.77456	1.64201	9.7469	8.12256	4.26966	3.28016	5.56073	4.53534	2.741	2.98528
G1S	ENSG00000099260	PALMD	protein_coding	0	0.002275	0.09553	0.10062	0.022311	0.019774	0.039354	0.031099	0.009254	0.012422
G1S	ENSG00000099849	RASSF7	protein_coding	3.95626	3.60142	12.3571	12.3	7.60564	7.82363	5.74867	6.16362	5.908	7.1434
G1S	ENSG00000099866	MADCAM1	protein_coding	0.380321	0.459821	1.15951	1.09346	0.588242	0.47451	0.49964	0.448503	0.20291	0.146937
G1S	ENSG00000099889	ARVCF	protein_coding	13.783	12.8307	98.2604	95.7756	41.7011	39.4992	27.1358	30.3668	38.8269	42.117
G1S	ENSG00000099953	MMP11	protein_coding	0.106887	0	0.17247	0.271796	0.033704	0	0.042552	0	0	0
G1S	ENSG00000099957	P2RX6	protein_coding	0.815	0.92948	3.33461	2.85886	1.83755	1.92253	2.11032	2.39127	0.618729	0.523039
G1S	ENSG00000100027	YPEL1	protein_coding	0.559385	0.502951	2.84979	3.02783	1.75099	1.65877	0.909297	1.15305	0.932594	1.14386
G1S	ENSG00000100121	GGTLC2	protein_coding	0.507949	0.498326	2.91234	2.67938	2.65332	1.64644	1.54694	2.31269	1.11155	1.1588
G1S	ENSG00000100167	2019-09-03	protein_coding	4.4802	4.40125	12.3115	13.6779	8.48684	7.84034	4.0937	4.09629	5.27974	5.08663
G1S	ENSG00000100181	TPTEP1	transcribed_unprocessed_pseudogene	11.8678	17.0074	35.0102	36.4877	23.763	20.7201	15.0055	16.2034	22.3053	19.777
G1S	ENSG00000100344	PNPLA3	protein_coding	4.7503	4.84159	31.1732	22.1097	15.4825	20.6325	17.6295	17.9978	9.29141	11.2827
G1S	ENSG00000100439	ABHD4	protein_coding	6.15664	6.6479	41.7653	40.0669	19.12	19.4487	15.9375	13.4351	13.5368	14.4361
G1S	ENSG00000100557	CCDC198	protein_coding	0.942393	1.21764	2.40983	2.82819	1.239	1.61532	0.607485	0.942247	1.05482	0.854827
G1S	ENSG00000100767	PAPLN	protein_coding	2.35067	2.39885	9.1674	8.15557	4.92113	4.38057	4.8171	6.07188	1.98856	2.47702
G1S	ENSG00000101349	PAK5	protein_coding	0.037088	0.067085	0.282415	0.293742	0.109918	0.067967	0.111194	0.074785	0.19149	0.120289
G1S	ENSG00000101412	E2F1	protein_coding	27.7744	28.1431	67.2446	65.7666	41.6788	43.9071	22.0709	24.033	24.7899	28.0691
G1S	ENSG00000101417	PXMP4	protein_coding	1.03647	0.860165	3.91966	4.43792	2.42415	2.44078	2.19941	2.70522	1.91505	2.20981
G1S	ENSG00000101445	PPP1R16B	protein_coding	0.498186	0.571844	6.14868	7.12798	2.50509	2.72167	0.808285	0.755316	0.532898	0.533795
G1S	ENSG00000101489	CELF4	protein_coding	1.49998	1.63119	3.1277	3.05761	2.73932	2.86905	0.689487	0.664833	1.23313	0.777539
G1S	ENSG00000101746	NOL4	protein_coding	0.552569	0.359232	0.797837	1.40534	0.580342	0.796156	0.210201	0.379884	0.115925	0.04494
G1S	ENSG00000102053	ZC3H12B	protein_coding	0.259373	0.20257	1.36957	1.41675	0.876609	0.898755	0.856961	0.837437	0.538123	0.555038
G1S	ENSG00000102468	HTR2A	protein_coding	0.034569	0.055677	2.09174	1.66684	0.263797	0.192053	0.498102	0.445498	0.203955	0.148167
G1S	ENSG00000102678	FGF9	protein_coding	0.376784	0.489949	1.37837	0.774254	0.463578	0.57627	0.164812	0.118175	0.255633	0.080234
G1S	ENSG00000102796	DHRS12	protein_coding	1.11108	0.994268	3.00763	3.35665	2.56889	2.5494	1.7597	1.33844	1.54177	2.25076
G1S	ENSG00000102981	PARD6A	protein_coding	0.741302	0.81244	2.3195	2.22405	1.29919	1.3715	1.10279	0.948202	0.741824	0.879363
G1S	ENSG00000102984	ZNF821	protein_coding	5.77726	4.78951	9.76543	7.53976	6.25653	4.9717	7.03118	5.80342	5.14693	5.22128
G1S	ENSG00000103160	HSDL1	protein_coding	7.65266	7.60533	17.1875	17.7522	10.1139	10.3316	9.89754	12.7598	12.2765	13.296
G1S	ENSG00000103269	RHBDL1	protein_coding	0.84935	0.715083	5.30187	2.85421	2.40818	2.29291	2.48971	3.09668	1.33786	1.52687
G1S	ENSG00000103522	IL21R	protein_coding	0.599442	0.754137	4.71221	3.89544	2.48834	1.98213	1.43458	1.25896	0.16142	0.196143
G1S	ENSG00000103528	SYT17	protein_coding	5.68658	5.25368	19.1891	19.9175	10.895	8.51538	7.88207	7.42216	8.86455	9.42185
G1S	ENSG00000103995	CEP152	protein_coding	8.01744	8.28673	19.5568	19.7716	13.0565	13.0797	17.6466	17.0481	14.9428	14.4648
G1S	ENSG00000104093	DMXL2	protein_coding	4.14247	3.60566	21.2135	20.5688	12.8054	12.8978	9.42945	10.2193	8.25861	8.93606
G1S	ENSG00000104490	NCALD	protein_coding	0.099151	0.084849	0.795449	0.713239	0.32264	0.309005	0.24327	0.366023	0.150212	0.172202
G1S	ENSG00000105173	CCNE1	protein_coding	71.7642	74.1271	207.325	204.26	119.796	123.579	68.8122	73.6036	76.424	68.2172
G1S	ENSG00000105479	CCDC114	protein_coding	0.105027	0.050494	1.1782	1.30761	0.81665	0.866438	0.94944	1.00897	0.201741	0.342743
G1S	ENSG00000105550	FGF21	protein_coding	0.894113	1.15034	19.9189	24.0184	2.42378	3.35138	0.94704	1.07078	2.10056	2.36212
G1S	ENSG00000105711	SCN1B	protein_coding	4.49062	4.47944	10.2163	8.21221	7.29721	6.90095	3.91936	4.81064	3.86546	3.82178
G1S	ENSG00000105967	TFEC	protein_coding	0.07419	0.128106	1.36131	1.25995	0.415519	0.344154	0.666149	0.603723	0.058928	0.114013
G1S	ENSG00000105991	HOXA1	protein_coding	4.89835	5.21708	10.5059	12.2416	6.42393	6.42374	6.96784	7.19265	7.06851	7.55417
G1S	ENSG00000105997	HOXA3	protein_coding	2.40633	3.08069	7.23352	6.27616	3.52747	2.80891	1.29914	1.31683	1.49545	1.73769
G1S	ENSG00000106006	HOXA6	protein_coding	0.746338	0.504119	3.40295	3.12482	0.683466	0.354016	0.299989	0.228285	1.20739	1.29817
G1S	ENSG00000106031	HOXA13	protein_coding	0.550055	0.882451	3.74349	3.26261	1.15542	0.931744	0.746943	0.586671	0.398942	0.550773
G1S	ENSG00000106415	GLCCI1	protein_coding	0.870012	0.848472	5.41955	4.98675	1.76093	2.96319	2.24992	1.87537	1.68345	1.4411
G1S	ENSG00000106483	SFRP4	protein_coding	0.463187	0.411771	3.65782	3.11302	1.38049	1.2139	0.544447	0.592574	0.724652	0.536527
G1S	ENSG00000106536	POU6F2	protein_coding	0.480699	0.507008	2.52694	2.55889	1.29362	1.19256	1.53735	1.28187	1.02824	1.25908
G1S	ENSG00000106546	AHR	protein_coding	0.010081	0.134209	0.248397	0.183561	0.039588	0.119106	0.134945	0.163897	0.067776	0.119499
G1S	ENSG00000106560	GIMAP2	protein_coding	0.166083	0.266496	0.95836	0.79385	0.148904	0.294043	0.295487	0.334503	0.186106	0.122391
G1S	ENSG00000106689	LHX2	protein_coding	0.148246	0.302538	0.505583	0.327866	0.183189	0.28116	0.259259	0.238442	0.203576	0.216255
G1S	ENSG00000106823	ECM2	protein_coding	0.324127	0.26739	1.97918	1.85407	0.91605	1.0331	0.230678	0.29298	0.631793	0.48592
G1S	ENSG00000107105	ELAVL2	protein_coding	6.63648	6.2162	10.0423	13.5668	6.39576	8.36996	2.97494	3.27322	7.83666	7.40217
G1S	ENSG00000107242	PIP5K1B	protein_coding	0.498429	0.476965	2.35886	2.74474	0.929922	0.931782	0.867113	0.661819	1.19692	0.94476
G1S	ENSG00000107551	RASSF4	protein_coding	1.53459	1.76924	6.00125	6.56636	3.53987	3.75577	2.66102	3.4045	2.09049	3.35814
G1S	ENSG00000107562	CXCL12	protein_coding	0.149584	0.185714	1.65465	1.55055	1.0032	0.624772	0.496367	0.344473	0.269618	0.222156
G1S	ENSG00000107742	SPOCK2	protein_coding	0.299267	0.436546	1.01021	1.25077	0.719914	0.573783	0.963437	0.618622	0.437441	0.397065
G1S	ENSG00000107807	TLX1	protein_coding	0.833318	1.26109	2.32604	1.78086	1.05503	1.20206	1.14511	0.817565	0.530104	0.690386
G1S	ENSG00000107968	MAP3K8	protein_coding	4.3363	4.20967	8.69993	7.98698	5.65549	5.32951	5.5332	5.87604	3.14933	3.35131
G1S	ENSG00000108239	TBC1D12	protein_coding	5.09539	5.29605	11.2008	11.5056	5.73076	5.7738	6.95766	6.85277	6.76623	6.15203
G1S	ENSG00000108387	2019-09-04	protein_coding	0.506845	0.443236	1.74714	1.85153	1.20049	1.35941	1.01461	1.00266	0.95657	0.738085
G1S	ENSG00000108684	ASIC2	protein_coding	0.566514	0.233074	2.18156	1.86013	1.47208	1.04324	0.512812	0.760256	0.723922	0.700177
G1S	ENSG00000108799	EZH1	protein_coding	5.64305	5.74281	12.8692	12.9777	7.35197	6.96444	8.73839	9.84335	8.42795	9.6991
G1S	ENSG00000108823	SGCA	protein_coding	0.109654	0.024377	0.910806	1.05255	0.368579	0.566615	0.223295	0.074916	0.11778	0.062623
G1S	ENSG00000109103	UNC119	protein_coding	24.0393	21.0515	58.2884	51.2367	33.9755	27.7017	38.3533	35.9275	35.8446	34.6972
G1S	ENSG00000109265	KIAA1211	protein_coding	1.59817	1.1121	13.7685	13.349	7.21113	5.39142	2.98274	3.36387	2.7438	2.5184
G1S	ENSG00000109458	GAB1	protein_coding	2.89067	1.74266	4.50931	4.36091	2.61196	3.4513	2.52978	2.76154	2.59769	1.77039
G1S	ENSG00000109501	WFS1	protein_coding	10.6961	10.8186	42.6962	35.219	21.4118	26.9972	25.201	27.2187	21.2732	17.3266
G1S	ENSG00000109654	TRIM2	protein_coding	2.47142	2.2898	5.95927	6.35917	3.75828	3.70859	3.74706	3.70428	3.57697	3.9169
G1S	ENSG00000109680	TBC1D19	protein_coding	1.89708	1.73356	5.94436	5.19246	3.11793	2.88392	4.04641	2.47802	3.70333	3.00498
G1S	ENSG00000109738	GLRB	protein_coding	7.23348	6.72325	21.5105	24.2515	15.4674	16.191	6.79635	7.18418	10.7289	12.6848
G1S	ENSG00000109758	HGFAC	protein_coding	0.097371	0.037674	3.51505	2.45345	1.62702	1.57074	1.4772	1.13237	0.699383	0.877546
G1S	ENSG00000110171	TRIM3	protein_coding	6.69864	6.77635	16.2771	14.7016	9.41801	8.07018	11.1193	11.5734	7.13924	9.78982
G1S	ENSG00000110237	ARHGEF17	protein_coding	6.4833	6.6752	44.0543	43.8205	30.3057	26.1834	31.1363	37.7709	29.2869	32.9505
G1S	ENSG00000110675	ELMOD1	protein_coding	2.76904	2.41064	4.93982	4.56297	2.73848	2.74312	2.75846	3.04431	2.89036	3.048
G1S	ENSG00000110693	SOX6	protein_coding	0.634775	0.678806	3.48036	2.99345	2.48086	2.43267	1.88914	1.84116	1.7558	1.19466
G1S	ENSG00000111181	SLC6A12	protein_coding	0.196598	0.333609	3.37124	2.71757	2.02945	1.7786	1.00212	0.890467	0.441119	0.47382
G1S	ENSG00000111554	MDM1	protein_coding	4.31329	4.96678	10.5394	12.6785	7.64657	8.09201	7.96793	7.26608	7.38924	7.36913
G1S	ENSG00000111801	BTN3A3	protein_coding	0.651017	0.543009	2.80685	1.55572	1.41394	0.641017	1.86758	1.34103	0.691507	0.518535
G1S	ENSG00000111816	FRK	protein_coding	0.076795	0.050549	0.250782	0.236379	0.122066	0.076132	0.137433	0.100806	0.036257	0.043125
G1S	ENSG00000111879	FAM184A	protein_coding	0.426399	0.386256	0.898985	0.949254	0.249493	0.376806	0.254774	0.20847	0.577996	0.674057
G1S	ENSG00000111886	GABRR2	protein_coding	0.062337	0.021364	0.537797	0.435591	0.203106	0.114256	0.243889	0.269347	0.229023	0.46616
G1S	ENSG00000111912	NCOA7	protein_coding	9.20767	8.73206	16.0378	17.7049	10.4825	11.3155	9.36718	7.4385	11.6747	9.93366
G1S	ENSG00000112812	PRSS16	protein_coding	1.38038	1.31559	6.27059	4.75045	3.36012	3.65486	1.74627	2.20983	0.563084	0.988664
G1S	ENSG00000112902	SEMA5A	protein_coding	0.368588	0.33412	0.592429	1.06167	0.556426	0.578171	0.492834	0.365272	0.290531	0.272528
G1S	ENSG00000112964	GHR	protein_coding	1.34011	1.64923	4.17832	4.2504	1.69121	3.74293	2.05112	1.49476	1.41823	1.50068
G1S	ENSG00000113248	PCDHB15	protein_coding	0.410134	0.401209	1.26759	1.2353	0.794107	0.649314	0.763731	0.512992	0.387361	0.366657
G1S	ENSG00000113790	EHHADH	protein_coding	3.32333	3.06638	7.11714	8.05397	3.8613	3.81065	3.25588	3.82805	3.79935	4.64239
G1S	ENSG00000114698	PLSCR4	protein_coding	0.647078	0.548628	6.08086	7.41694	3.27083	3.25291	1.91243	1.97395	1.12729	1.06369
G1S	ENSG00000115267	IFIH1	protein_coding	1.0609	1.13434	4.55794	4.10043	2.32088	2.18384	1.65547	1.81832	0.740574	0.980803
G1S	ENSG00000115392	FANCL	protein_coding	22.6787	20.739	47.898	51.1448	31.7417	30.728	22.6507	22.1946	19.6493	19.8275
G1S	ENSG00000115902	SLC1A4	protein_coding	13.1228	12.2468	42.8759	42.2652	28.163	42.0088	23.6298	24.1457	12.5152	20.5468
G1S	ENSG00000116031	CD207	protein_coding	0.160458	0.070747	0.835004	1.12723	0.560609	0.559138	0.255172	0.384597	0.062938	0.104972
G1S	ENSG00000116035	VAX2	protein_coding	0.271359	0.391996	0.952291	0.937825	0.623224	0.570979	0.412662	0.106421	0.181989	0.17352
G1S	ENSG00000116205	TCEANC2	protein_coding	1.68581	1.1542	2.72704	2.72193	1.21529	1.13764	2.04988	1.76113	1.93343	2.34973
G1S	ENSG00000116213	WRAP73	protein_coding	13.8542	11.5416	26.6474	28.2774	15.359	17.2108	15.5383	18.0758	25.6998	27.6014
G1S	ENSG00000116574	RHOU	protein_coding	1.60568	1.59124	3.88263	3.63921	2.2	2.30016	1.83344	1.78208	1.77755	1.68396
G1S	ENSG00000116652	DLEU2L	sense_intronic	0.196071	0.177916	0.304454	0.506792	0.244779	0.250617	0.265332	0.339359	0.051176	0.069315
G1S	ENSG00000116785	CFHR3	protein_coding	0.115779	0.105008	1.13529	0.979863	0.378346	0.530455	0.313353	0.158282	0.03925	0.112684
G1S	ENSG00000117016	RIMS3	protein_coding	2.16839	1.97861	6.0028	6.48389	3.64691	3.35916	2.59639	2.42536	2.69449	3.16214
G1S	ENSG00000117600	PLPPR4	protein_coding	0.237787	0.168697	0.985839	1.04772	0.603104	0.7101	0.385099	0.296211	0.129682	0.113359
G1S	ENSG00000118407	FILIP1	protein_coding	0.01806	0.027457	0.450748	0.513064	0.083309	0.043865	0.238108	0.19035	0.0538	0.032374
G1S	ENSG00000118946	PCDH17	protein_coding	0.758168	0.78931	2.67288	2.67269	1.20951	1.04113	1.05	0.934658	1.31791	1.44355
G1S	ENSG00000119280	C1orf198	protein_coding	14.8841	16.9387	41.2169	47.812	22.9905	29.1063	14.282	15.0708	25.1856	28.294
G1S	ENSG00000119640	ACYP1	protein_coding	17.514	19.1292	49.4135	46.1961	28.6144	30.2691	16.4066	18.43	19.2596	19.99
G1S	ENSG00000119699	TGFB3	protein_coding	6.13991	6.00892	18.8876	18.7715	9.81927	8.29465	6.91907	6.65854	4.72826	4.52574
G1S	ENSG00000119899	SLC17A5	protein_coding	2.53207	2.19619	8.31785	8.08125	5.11378	4.57768	2.84711	2.58767	3.7554	3.80362
G1S	ENSG00000119922	IFIT2	protein_coding	0.379965	0.347858	1.08654	1.22833	0.485581	0.4277	0.699869	0.703084	0.080482	0.069468
G1S	ENSG00000119943	PYROXD2	protein_coding	3.50325	4.48345	14.3075	12.681	9.81535	7.31883	6.73454	7.3313	5.5217	5.41489
G1S	ENSG00000120162	MOB3B	protein_coding	8.59558	8.45014	41.4204	44.0555	23.5161	26.4772	13.9837	14.1883	16.5015	19.6128
G1S	ENSG00000120251	GRIA2	protein_coding	0	0.008355	0.136684	0.072094	0.153594	0.13688	0.032272	0.117777	0.027128	0.004496
G1S	ENSG00000120256	LRP11	protein_coding	2.7466	1.91304	8.16541	8.58302	5.73299	5.79374	3.62501	8.20383	2.28396	2.92011
G1S	ENSG00000120278	PLEKHG1	protein_coding	1.0795	1.1518	2.44951	4.22607	1.91002	2.25001	2.35517	1.94149	1.53439	2.63787
G1S	ENSG00000120658	ENOX1	protein_coding	0.208409	0.285205	1.23523	0.993787	0.604686	0.649371	0.748259	0.534931	0.529198	0.541155
G1S	ENSG00000120832	MTERF2	protein_coding	3.49096	2.51157	6.59696	7.21465	3.23498	3.44196	5.28436	4.28071	5.31695	4.42875
G1S	ENSG00000120868	APAF1	protein_coding	5.76879	4.74162	7.94337	8.00635	4.01436	3.97092	6.19492	10.4079	5.8596	6.82611
G1S	ENSG00000120907	ADRA1A	protein_coding	0.289539	0.312337	0.621374	0.717371	0.422489	0.27212	0.448681	0.34259	0.271056	0.236221
G1S	ENSG00000121068	TBX2	protein_coding	0.004506	0.007154	0.015049	0.070692	0.008397	0.011512	0.037814	0.014484	0.04158	0.027629
G1S	ENSG00000121075	TBX4	protein_coding	0.496925	0.62014	1.07216	1.20793	0.517713	0.450203	0.34464	0.300935	0.471247	0.574052
G1S	ENSG00000121690	DEPDC7	protein_coding	8.62597	9.81173	23.2995	25.1412	12.9607	12.8594	18.9941	21.1984	14.7195	14.8865
G1S	ENSG00000121931	LRIF1	protein_coding	0.073772	0.104961	0.158407	0.229059	0.163656	0.049119	0.203138	0.16668	0.098637	0.074337
G1S	ENSG00000123201	GUCY1B2	transcribed_unitary_pseudogene	0.096104	0.223771	1.20869	1.4259	1.10982	0.856095	0.820456	0.541929	0.584079	0.264272
G1S	ENSG00000123700	KCNJ2	protein_coding	0.227067	0.179356	0.457305	0.410692	0.082404	0.095566	0.111634	0.079779	0.042803	0.080171
G1S	ENSG00000124593	AL365205.1	protein_coding	34.4651	37.2599	32.4453	33.1547	29.9191	31.1282	27.2507	29.5688	41.2927	40.9012
G1S	ENSG00000124762	CDKN1A	protein_coding	264.251	222.71	265.026	298.01	273.474	284.817	192.629	206.817	50.2451	55.7394
G1S	ENSG00000125434	SLC25A35	protein_coding	0.478397	0.526525	3.69975	2.84174	1.82381	2.06588	2.02112	2.03415	1.24923	1.03734
G1S	ENSG00000125533	BHLHE23	protein_coding	0.367148	0.256799	0.772929	0.603737	0.340948	0.30376	0.123705	0.158883	0.310212	0.539644
G1S	ENSG00000125631	HTR5BP	transcribed_unprocessed_pseudogene	0	0.019044	0.251965	0.251566	0.068316	0.023358	0.039698	0.05279	0.058212	0
G1S	ENSG00000125787	GNRH2	protein_coding	0.081689	0.174062	0.824312	0.379441	0.409214	0.266275	0.417861	0.469385	0.279203	0.575311
G1S	ENSG00000125848	FLRT3	protein_coding	3.26038	2.72316	11.4583	11.2085	4.6383	4.29058	1.93821	2.14782	0.694061	0.762638
G1S	ENSG00000125910	S1PR4	protein_coding	0.401762	0.45978	1.24379	1.13987	0.758159	0.54188	0.539032	0.406034	0.252354	0.298148
G1S	ENSG00000125965	GDF5	protein_coding	0.02986	0.007894	0.165283	0.106367	0.05071	0.045667	0.022369	0.032789	0.005799	0.00986
G1S	ENSG00000126016	AMOT	protein_coding	8.60046	8.20143	19.8888	22.6074	9.40105	8.95063	7.73128	6.87111	14.566	13.9654
G1S	ENSG00000126246	IGFLR1	protein_coding	1.38396	1.48421	6.09144	3.74617	3.25156	2.33108	2.05479	1.98198	1.50133	1.4859
G1S	ENSG00000127084	FGD3	protein_coding	0.075329	0.137451	0.408354	0.434218	0.270792	0.115182	0.221426	0.191051	0.078153	0.143916
G1S	ENSG00000127220	ABHD8	protein_coding	10.0626	10.4014	20.7305	20.6499	12.3902	12.1903	10.7385	9.63832	14.9241	15.5565
G1S	ENSG00000127249	ATP13A4	protein_coding	0.107383	0.002907	0.132235	0.174502	0.167858	0.049439	0.137296	0.06899	0.066476	0.115472
G1S	ENSG00000128165	ADM2	protein_coding	8.97958	8.96847	25.4816	25.1848	11.3136	12.0052	6.71738	6.91962	9.64664	11.1516
G1S	ENSG00000128271	ADORA2A	protein_coding	1.65279	0.482711	10.0488	8.67246	5.72986	2.35407	3.23954	4.5973	2.70294	2.49876
G1S	ENSG00000128298	BAIAP2L2	protein_coding	0.157806	0.096901	0.906718	0.70987	0.444947	0.469598	0.635169	0.521087	0.290275	0.434227
G1S	ENSG00000128573	FOXP2	protein_coding	0.04859	0.112308	0.175962	0.092512	0.051207	0	0.01236	0.0191	0.090476	0.029375
G1S	ENSG00000128604	IRF5	protein_coding	0.09718	0.161787	0.742308	0.902579	0.401375	0.422013	0.232336	0.459277	0.155025	0.298553
G1S	ENSG00000128606	LRRC17	protein_coding	2.8096	1.65231	7.76876	8.13171	4.16539	4.40987	4.2195	2.88727	2.70982	2.67704
G1S	ENSG00000128652	HOXD3	protein_coding	0.961577	0.913704	2.43701	2.06337	1.16951	1.22441	0.910212	0.784534	0.671113	0.606848
G1S	ENSG00000128655	PDE11A	protein_coding	0.17351	0.17258	0.624879	0.777711	0.474807	0.520286	0.537486	0.575981	0.338136	0.446696
G1S	ENSG00000128965	CHAC1	protein_coding	4.05367	11.7389	16.5208	6.43179	2.1184	2.69085	4.26495	3.40768	2.46724	3.76355
G1S	ENSG00000129159	KCNC1	protein_coding	0.719754	0.649767	4.25173	2.40495	1.16225	2.34778	0.915695	0.964052	0.439231	0.44099
G1S	ENSG00000129474	AJUBA	protein_coding	22.9334	23.0514	61.3382	100.706	34.9618	35.7947	36.7764	34.3959	40.5006	44.2119
G1S	ENSG00000129757	CDKN1C	protein_coding	2.08815	1.8364	4.59492	3.66513	1.91325	2.17915	1.18161	1.1809	1.20948	1.24093
G1S	ENSG00000129988	LBP	protein_coding	0.01195	0.045054	0.459979	0.435958	0.239154	0.302257	0.089442	0.235637	0.047377	0.032286
G1S	ENSG00000129993	CBFA2T3	protein_coding	0.010468	0	0.043086	0.091466	0.013888	0.011067	0.011033	0	0	0
G1S	ENSG00000130045	NXNL2	protein_coding	1.95494	1.29935	2.74816	4.88567	2.79415	2.29625	2.0278	1.85717	1.31113	1.66224
G1S	ENSG00000130517	PGPEP1	protein_coding	5.58538	4.39832	10.9529	10.7745	7.36819	7.10487	4.78767	6.35313	2.25908	2.07743
G1S	ENSG00000130522	JUND	protein_coding	52.2555	53.9006	110.781	99.8614	65.7286	66.7526	34.8442	34.5793	14.7191	18.2612
G1S	ENSG00000130684	ZNF337	protein_coding	6.5443	6.6323	15.7026	13.7462	8.33218	7.83303	10.4457	10.2177	5.27963	5.8182
G1S	ENSG00000130734	ATG4D	protein_coding	8.33706	8.02954	19.0197	17.353	9.87506	11.3129	7.73615	9.17138	7.87371	11.7312
G1S	ENSG00000130783	CCDC62	protein_coding	3.59462	3.21604	10.163	11.0363	4.97865	5.40788	4.71784	4.22101	4.75639	4.6197
G1S	ENSG00000130876	SLC7A10	protein_coding	0.364521	0.381076	4.02229	3.22765	2.62722	1.83404	1.55222	1.75395	0.751173	0.628749
G1S	ENSG00000131669	NINJ1	protein_coding	35.3779	40.1824	103.315	94.7355	57.7467	58.2745	36.6416	36.7267	28.5439	28.5253
G1S	ENSG00000131797	CLUHP3	transcribed_unprocessed_pseudogene	2.3259	3.02324	6.1593	6.91266	3.89661	4.15963	3.68982	3.88547	0.896778	1.08621
G1S	ENSG00000132164	SLC6A11	protein_coding	2.31722	2.14543	4.19693	3.86205	2.47907	2.73154	1.57296	1.572	1.75446	1.80981
G1S	ENSG00000132196	HSD17B7	protein_coding	9.99174	10.9096	26.6124	25.0863	17.0101	16.5022	16.7381	16.7125	16.2265	15.4873
G1S	ENSG00000132517	SLC52A1	protein_coding	0.338192	0.199583	2.7848	2.85851	0.829027	0.678059	0.533438	0.739114	0.183015	0.196592
G1S	ENSG00000132793	LPIN3	protein_coding	2.50737	2.55805	13.9072	12.9796	6.68212	6.14347	7.18813	9.15618	4.56625	4.85895
G1S	ENSG00000132854	KANK4	protein_coding	0.01003	0.011579	0.626359	0.499663	0.352265	0.366304	0.06219	0.042329	0.097438	0.019464
G1S	ENSG00000132879	FBXO44	protein_coding	8.31455	8.34914	32.6983	23.3805	13.8031	13.856	13.3885	14.5843	11.7643	12.9905
G1S	ENSG00000132975	GPR12	protein_coding	0.104433	0.052736	0.333771	0.401679	0.183222	0.152722	0.095049	0.086701	0.166364	0.045106
G1S	ENSG00000133056	PIK3C2B	protein_coding	3.58118	3.47349	6.60691	7.22825	2.80074	2.65422	3.14984	3.2042	3.78794	4.47065
G1S	ENSG00000133247	KMT5C	protein_coding	5.03449	4.7444	16.3205	14.7474	10.2457	8.29457	8.22204	7.98332	3.11528	3.97142
G1S	ENSG00000133475	GGT2	protein_coding	0.009768	0.013741	0.286854	0.151073	0.078174	0.058582	0.097083	0.089505	0.049115	0.051512
G1S	ENSG00000133624	ZNF767P	transcribed_unprocessed_pseudogene	2.80867	2.77068	6.24013	4.53495	3.44889	3.44638	4.21076	5.14085	2.39278	1.90948
G1S	ENSG00000133985	TTC9	protein_coding	1.42341	1.6242	8.11275	8.30409	3.58821	3.49351	1.86068	1.78541	3.41686	4.05091
G1S	ENSG00000134253	TRIM45	protein_coding	2.92017	2.56153	6.56918	5.79712	2.61864	3.21623	2.26203	2.69297	1.11295	1.37282
G1S	ENSG00000134297	PLEKHA8P1	transcribed_processed_pseudogene	26.7544	24.7841	51.6701	51.4062	25.7447	26.8565	24.2307	24.0675	26.664	23.3923
G1S	ENSG00000134317	GRHL1	protein_coding	1.40147	1.42057	4.58928	3.89722	1.39233	1.57691	2.13746	1.86754	2.15785	2.23357
G1S	ENSG00000134574	DDB2	protein_coding	28.2766	40.477	88.2863	69.1947	49.215	50.2169	47.579	51.5155	29.8602	37.3606
G1S	ENSG00000134769	DTNA	protein_coding	7.48664	8.16513	13.061	17.4769	6.25931	5.92519	5.46127	6.35301	6.48704	7.1371
G1S	ENSG00000134986	NREP	protein_coding	11.217	11.954	63.1248	60.7006	45.8252	38.9359	30.0496	27.1934	14.4042	14.3769
G1S	ENSG00000135063	FAM189A2	protein_coding	0.065229	0.125255	0.254751	0.191089	0.103849	0.115546	0.028477	0.085711	0.012955	0.024044
G1S	ENSG00000135315	CEP162	protein_coding	4.57303	4.60787	9.85237	9.22274	5.19302	6.03514	7.25093	5.86998	4.78653	4.28658
G1S	ENSG00000135378	PRRG4	protein_coding	0.687204	0.613257	4.11226	4.23959	1.33989	1.31654	0.918324	0.953385	0.736599	0.92519
G1S	ENSG00000135835	KIAA1614	protein_coding	0.668707	0.281526	2.79384	2.97213	0.969746	1.58714	0.597381	1.01599	0.332306	0.698199
G1S	ENSG00000135917	SLC19A3	protein_coding	0	0.004617	0.095874	0.069137	0.027429	0.00475	0.020939	0.005223	0	0
G1S	ENSG00000135973	GPR45	protein_coding	3.33551	3.44676	8.52636	9.11524	5.29631	4.74216	4.55904	4.46397	6.16437	6.94672
G1S	ENSG00000136237	RAPGEF5	protein_coding	0.147178	0.107172	2.04496	1.97463	0.866101	0.885642	0.126084	0.272613	0.617527	0.927196
G1S	ENSG00000136352	NKX2-1	protein_coding	1.29102	1.25802	4.05668	2.5909	2.1989	2.29048	1.2485	1.49986	0.615002	0.645815
G1S	ENSG00000136514	RTP4	protein_coding	0.067026	0.0917	0.567377	0.713577	0.2107	0.310263	0.186277	0.184444	0.044789	0.074629
G1S	ENSG00000136531	SCN2A	protein_coding	0.269833	0.313244	2.34957	2.1373	1.32135	1.14362	1.10311	1.16063	0.322251	0.316173
G1S	ENSG00000136867	SLC31A2	protein_coding	3.80816	3.78139	12.1191	12.5551	7.54966	8.12274	6.03635	6.1147	4.9569	5.48246
G1S	ENSG00000137090	DMRT1	protein_coding	0.35262	0.094519	0.642544	0.66515	0.285858	0.319551	0.38678	0.183523	0.085336	0.124017
G1S	ENSG00000137103	TMEM8B	protein_coding	1.37039	1.36434	2.87374	3.38739	1.91686	1.7866	1.84336	1.91029	1.77473	1.98776
G1S	ENSG00000137266	SLC22A23	protein_coding	2.11246	1.76772	3.44703	3.74584	1.48854	1.55257	0.844872	1.22234	2.54312	2.49624
G1S	ENSG00000137310	TCF19	protein_coding	11.5593	12.3329	64.0131	37.3877	22.2821	41.1557	29.6822	30.6897	23.2262	15.1408
G1S	ENSG00000137393	RNF144B	protein_coding	0.718743	0.684414	1.69804	1.76908	0.917782	0.880291	0.447433	0.443521	0.36117	0.350247
G1S	ENSG00000137502	RAB30	protein_coding	4.74362	8.00519	11.1791	15.793	5.63533	6.34683	6.08716	8.2622	9.77976	7.73285
G1S	ENSG00000137561	TTPA	protein_coding	1.51641	1.50728	5.11473	5.02366	2.32782	2.5469	0.840878	1.25634	3.07396	1.85655
G1S	ENSG00000137834	SMAD6	protein_coding	3.31499	3.59709	7.92899	7.9685	5.62803	5.10179	2.37962	2.80252	2.12673	2.12476
G1S	ENSG00000137878	GCOM1	protein_coding	1.635	1.9651	4.17969	3.52933	2.78284	2.81331	1.57227	2.37904	3.23581	1.90323
G1S	ENSG00000138030	KHK	protein_coding	1.52375	1.93068	6.16515	5.96111	3.6555	3.26558	2.67272	2.95619	1.95485	2.23654
G1S	ENSG00000138346	DNA2	protein_coding	9.0881	9.58907	35.5672	31.7005	20.5781	20.6553	13.8964	14.7156	13.4073	14.5144
G1S	ENSG00000138376	BARD1	protein_coding	7.60798	6.90135	15.3759	14.8978	9.58269	11.165	11.087	8.73923	3.98018	3.74432
G1S	ENSG00000138449	SLC40A1	protein_coding	7.67101	8.91206	17.31	18.6443	7.85059	9.36666	7.73636	7.30768	9.14529	10.0553
G1S	ENSG00000138496	PARP9	protein_coding	2.73516	2.33866	25.8293	26.3822	11.4885	13.7525	11.5517	9.13434	5.75527	6.9773
G1S	ENSG00000138639	ARHGAP24	protein_coding	0.311212	0.276637	2.34748	2.67224	0.839599	1.21985	1.93392	2.08739	0.614081	0.395383
G1S	ENSG00000138735	PDE5A	protein_coding	2.13823	2.29982	9.62159	9.04617	3.86046	4.42304	2.57232	2.15046	1.7843	1.74306
G1S	ENSG00000139174	PRICKLE1	protein_coding	9.366	9.34337	20.5823	22.9559	12.2104	14.3221	12.7266	11.3321	12.826	14.4317
G1S	ENSG00000139190	VAMP1	protein_coding	9.31271	9.60799	27.77	23.2574	12.1194	9.90175	13.8572	13.2506	3.26561	4.12631
G1S	ENSG00000139269	INHBE	protein_coding	0.971283	1.23581	10.452	9.58226	3.56726	3.81235	1.215	0.962635	1.13899	1.30421
G1S	ENSG00000139531	SUOX	protein_coding	1.95869	2.52646	7.91111	3.29576	1.94685	3.24676	3.59731	2.85502	7.52372	2.23293
G1S	ENSG00000139835	GRTP1	protein_coding	3.61803	3.70524	7.08064	7.06089	3.72684	3.3041	3.49245	3.03223	4.49918	5.16425
G1S	ENSG00000139910	NOVA1	protein_coding	2.18062	2.19872	6.18888	6.52632	3.8668	4.17763	3.28529	3.48974	1.9858	1.95614
G1S	ENSG00000140022	STON2	protein_coding	6.06599	5.79414	18.6115	19.0201	10.9384	10.2984	10.5528	10.2703	3.26411	2.89781
G1S	ENSG00000140090	SLC24A4	protein_coding	0.19888	0.187523	0.633927	0.68363	0.358862	0.277495	0.144758	0.217579	0.123417	0.270058
G1S	ENSG00000140835	CHST4	protein_coding	1.74942	1.84814	4.93632	4.79048	2.42248	2.44171	2.71415	2.59641	3.41006	3.59934
G1S	ENSG00000140839	CLEC18B	protein_coding	0.427804	0.551688	1.65258	1.63109	1.38403	1.00234	1.11428	1.26744	0.365211	0.563986
G1S	ENSG00000141034	GID4	protein_coding	3.56959	3.21119	9.29714	9.87857	4.8769	4.48116	3.70471	2.69664	3.38155	3.26898
G1S	ENSG00000141068	KSR1	protein_coding	5.02531	4.16868	13.9825	13.7321	8.05488	8.97219	7.24547	7.61032	7.9961	8.61589
G1S	ENSG00000141391	PRELID3A	protein_coding	3.99187	3.51309	24.5438	20.6204	12.7805	13.4363	12.3238	13.716	13.6835	14.8602
G1S	ENSG00000141401	IMPA2	protein_coding	5.3112	6.26704	19.9133	14.1135	11.9848	7.86191	4.21983	4.73593	12.5678	12.9913
G1S	ENSG00000141441	GAREM1	protein_coding	1.55548	1.39342	3.08826	3.50216	1.91237	1.81149	1.57151	1.40885	2.30916	2.11859
G1S	ENSG00000141449	GREB1L	protein_coding	0.67208	0.568825	4.9897	6.31133	3.13289	3.20176	2.35726	2.38219	1.95257	1.40691
G1S	ENSG00000141574	SECTM1	protein_coding	0.019707	0.053594	0.174667	0.210529	0.0438	0.030585	0.191842	0.098648	0.091532	0.089257
G1S	ENSG00000141738	GRB7	protein_coding	0.399266	0.266662	1.62982	1.38885	0.520509	0.812983	0.462882	0.845464	0.805984	0.53566
G1S	ENSG00000141854	MISP3	protein_coding	1.2854	1.2009	3.06398	2.16992	2.07535	1.4628	1.59803	1.74173	0.730413	0.614047
G1S	ENSG00000142065	ZFP14	protein_coding	0.48407	0.489059	4.52792	4.09959	1.78023	1.62312	1.47832	1.76104	1.50192	1.2975
G1S	ENSG00000142149	HUNK	protein_coding	4.09041	4.17169	16.7207	17.9992	9.61641	9.98601	5.49181	5.70526	4.44596	4.49495
G1S	ENSG00000142327	RNPEPL1	protein_coding	13.4501	12.94	32.4909	25.9251	18.2013	16.5521	11.1323	11.8438	7.3421	21.8902
G1S	ENSG00000142459	EVI5L	protein_coding	3.12963	3.35155	7.95874	8.20457	5.01695	4.55046	3.41902	2.81458	5.32332	6.14186
G1S	ENSG00000142677	IL22RA1	protein_coding	0.521386	0.507034	3.42625	3.1155	1.06672	0.978124	1.4323	1.31716	0.700495	0.646235
G1S	ENSG00000143013	LMO4	protein_coding	8.28214	11.0136	26.3698	25.7485	10.1359	12.902	8.81914	10.1468	11.5547	13.274
G1S	ENSG00000143105	KCNA10	protein_coding	0.047808	0	0.363828	0.520133	0.215102	0.222303	0.136035	0.158439	0.023792	0.089448
G1S	ENSG00000143178	TBX19	protein_coding	0.627272	0.542628	2.97216	2.4365	1.6822	1.52459	1.93933	2.09243	1.19123	1.32398
G1S	ENSG00000143184	XCL1	protein_coding	0.230361	0.347717	1.09398	0.761269	0.572998	0.532848	0.623265	0.714539	0.171616	0.218115
G1S	ENSG00000143217	NECTIN4	protein_coding	4.76513	6.86537	15.1282	14.7792	9.45183	10.9185	7.96911	9.10567	1.11935	0.80391
G1S	ENSG00000143367	TUFT1	protein_coding	26.5194	28.9607	61.3181	91.8659	30.5216	49.7896	62.1266	45.3877	28.7486	29.0919
G1S	ENSG00000143630	HCN3	protein_coding	1.73094	1.20799	5.54074	3.81702	3.4934	2.4691	4.00249	2.69855	1.03315	1.27817
G1S	ENSG00000143847	PPFIA4	protein_coding	4.27937	4.12611	12.9529	13.0296	5.23022	5.03862	4.46933	5.07064	3.56161	3.21548
G1S	ENSG00000144026	ZNF514	protein_coding	8.42236	6.5369	12.3266	10.8474	7.67779	8.26517	7.18773	5.74593	5.57691	7.80894
G1S	ENSG00000144227	NXPH2	protein_coding	0.875813	0.908831	13.0976	13.1635	6.82769	6.39934	1.60502	2.59833	1.1173	1.05123
G1S	ENSG00000144362	PHOSPHO2	protein_coding	1.6475	2.25385	3.24069	3.68411	1.67303	2.12557	2.05979	2.58988	2.38694	2.16534
G1S	ENSG00000144460	NYAP2	protein_coding	0.071398	0.051381	1.10482	1.16236	0.599411	0.848853	1.0134	0.785845	0.060583	0.0949
G1S	ENSG00000144485	HES6	protein_coding	4.01307	3.86511	9.24192	9.83942	6.05397	5.83875	2.72167	2.44642	3.09094	3.20248
G1S	ENSG00000144791	LIMD1	protein_coding	15.219	16.1023	29.9482	30.9186	19.3022	19.6182	15.9338	16.7843	12.8127	13.3569
G1S	ENSG00000144792	ZNF660	protein_coding	1.79913	1.97155	4.18876	4.1588	3.0801	2.82844	3.4396	3.02077	1.36094	1.07432
G1S	ENSG00000144852	NR1I2	protein_coding	0.030198	0.061286	0.681001	1.04112	0.3237	0.317163	0.341848	0.276057	0.013682	0.026803
G1S	ENSG00000145284	SCD5	protein_coding	10.1881	9.23654	37.7972	35.1692	19.3998	17.714	9.75783	9.15399	17.8022	18.5161
G1S	ENSG00000145428	RNF175	protein_coding	0.049646	0.038527	0.109898	0.138718	0.160862	0.083383	0.062297	0.171659	0	0
G1S	ENSG00000145506	NKD2	protein_coding	0.380061	0.386688	2.08489	1.39374	1.07323	1.07901	1.04537	1.27628	1.32424	1.44224
G1S	ENSG00000145687	SSBP2	protein_coding	6.55314	5.48419	14.0507	12.9316	6.32062	6.85148	3.57328	3.17947	9.89101	9.42584
G1S	ENSG00000145779	TNFAIP8	protein_coding	1.66291	3.18169	19.9209	13.4736	7.47868	7.85728	3.90091	3.28106	4.25013	5.04152
G1S	ENSG00000145861	C1QTNF2	protein_coding	4.50908	5.06301	22.5636	20.2558	13.1226	14.2771	7.12851	7.72893	4.1997	5.08362
G1S	ENSG00000145864	GABRB2	protein_coding	1.26266	1.10667	1.96749	2.24152	1.04877	1.43633	0.858866	0.931057	0.333813	0.181791
G1S	ENSG00000146021	KLHL3	protein_coding	0.039596	0.062215	1.90339	1.34774	1.0713	0.862533	0.738084	0.706964	0.752293	0.602014
G1S	ENSG00000146233	CYP39A1	protein_coding	0.685489	0.619646	2.79208	2.47884	1.30707	1.11418	0.612372	0.973826	0.44317	0.473573
G1S	ENSG00000146411	SLC2A12	protein_coding	2.00587	1.86328	8.05701	8.1729	3.58245	2.63235	7.79066	4.43749	4.21668	4.46942
G1S	ENSG00000146733	PSPH	protein_coding	25.3588	24.2167	60.6072	62.3879	34.8837	38.7625	17.813	24.3185	24.5599	22.5842
G1S	ENSG00000146859	TMEM140	protein_coding	0.107572	0.174175	0.401634	0.550801	0.297356	0.272804	0.356164	0.400088	0.069824	0.076953
G1S	ENSG00000147003	CLTRN	protein_coding	0.512015	0.516076	2.5359	2.69124	1.83029	1.77782	0.816496	1.08588	0.360151	0.461154
G1S	ENSG00000147246	HTR2C	protein_coding	0.174511	0.08915	0.594258	0.614985	0.41487	0.256378	0.240836	0.24572	0.176266	0.208201
G1S	ENSG00000147852	VLDLR	protein_coding	9.93766	5.95251	16.3295	15.0511	12.6474	14.532	10.0971	9.24311	5.36881	5.31343
G1S	ENSG00000148408	CACNA1B	protein_coding	0.077972	0.127286	1.55225	1.38945	0.721045	0.569902	0.317832	0.419306	0.124852	0.155858
G1S	ENSG00000148483	TMEM236	protein_coding	0.134815	0.120555	0.539982	0.479855	0.289217	0.289955	0.19048	0.158832	0.14842	0.098251
G1S	ENSG00000148541	FAM13C	protein_coding	1.72162	1.74435	5.4232	5.88674	1.24097	1.49488	1.46486	1.24311	1.46834	1.39234
G1S	ENSG00000149043	SYT8	protein_coding	0.017751	0.02436	1.06276	1.0307	0.849903	0.441274	0.747459	0.849652	0.082448	0.088329
G1S	ENSG00000149090	PAMR1	protein_coding	0.328739	0.237514	0.773712	0.860884	0.412334	0.57951	0.400958	0.3586	0.345422	0.377204
G1S	ENSG00000149212	SESN3	protein_coding	2.69268	2.67137	7.45323	7.89727	4.56907	4.16771	5.71753	4.26708	4.35727	4.67677
G1S	ENSG00000149573	MPZL2	protein_coding	0	0	0.302532	0.299417	0.143131	0.123563	0.13959	0.200188	0.034644	0.042119
G1S	ENSG00000149636	DSN1	protein_coding	17.0218	16.4202	56.0633	54.5418	34.5413	33.254	24.8096	24.9193	22.8482	22.9018
G1S	ENSG00000149679	CABLES2	protein_coding	3.89646	4.50408	10.0654	10.4977	6.46168	6.57164	4.89509	4.63758	6.74172	7.13426
G1S	ENSG00000149922	TBX6	protein_coding	0.363943	0.508672	1.76091	1.09016	0.862846	0.860979	1.06845	1.14767	0.385807	0.521488
G1S	ENSG00000150394	CDH8	protein_coding	1.47946	1.26241	2.47424	2.61102	1.40051	1.36363	1.00795	1.08252	0.376703	0.670654
G1S	ENSG00000150510	FAM124A	protein_coding	0.685835	0.505533	2.7077	2.40921	0.946835	1.00809	0.506469	0.553457	1.53079	1.63892
G1S	ENSG00000150637	CD226	protein_coding	0.157468	0.159493	0.590603	0.818657	0.569344	0.624624	0.669589	0.26986	0.052115	0.38646
G1S	ENSG00000151365	THRSP	protein_coding	0.091124	0.052945	0.422179	0.392047	0.072145	0.021103	0	0.046798	0.039701	0
G1S	ENSG00000151687	ANKAR	protein_coding	2.69444	2.04702	5.20439	4.9776	3.93892	3.85871	3.46265	4.03077	2.98934	3.06354
G1S	ENSG00000151692	RNF144A	protein_coding	2.7169	2.64635	20.39	21.9597	12.2967	12.7344	9.80969	9.13917	6.32091	7.28003
G1S	ENSG00000151790	TDO2	protein_coding	0.977223	1.23117	2.92704	3.27644	1.49972	1.21075	0.900452	1.14659	1.9326	1.9475
G1S	ENSG00000151838	CCDC175	protein_coding	0.021706	0.009145	0.216817	0.128765	0.107824	0.107067	0.037645	0.041204	0.008849	0.043483
G1S	ENSG00000151882	CCL28	protein_coding	1.19636	0.80957	3.02097	2.78394	1.26453	2.16011	1.45118	1.14355	0.553911	0.575508
G1S	ENSG00000151967	SCHIP1	protein_coding	6.08204	5.11885	10.5217	11.5755	6.81039	8.79147	8.15097	7.70652	8.71933	6.29622
G1S	ENSG00000152061	RABGAP1L	protein_coding	6.60308	6.08726	14.9626	15.0842	10.2484	10.8707	10.4778	9.79405	12.6299	12.3695
G1S	ENSG00000152672	CLEC4F	protein_coding	0	0.028253	0.696227	0.655948	0.270095	0.357187	0.101864	0.082974	0.027808	0.036749
G1S	ENSG00000152779	SLC16A12	protein_coding	0.183601	0.241809	4.09872	3.71382	2.42367	2.67833	0.93576	0.867795	0.28596	0.209099
G1S	ENSG00000152782	PANK1	protein_coding	1.74849	2.08282	4.95909	7.09575	1.96891	2.01416	4.16932	3.83202	2.31665	2.82904
G1S	ENSG00000152910	CNTNAP4	protein_coding	0.44283	0.633598	2.64915	2.74063	1.77338	1.70412	2.22806	2.28258	0.523117	0.731503
G1S	ENSG00000153291	SLC25A27	protein_coding	4.18942	4.70336	27.2856	22.9322	12.8979	12.8354	9.74602	10.1742	1.632	1.39407
G1S	ENSG00000153823	PID1	protein_coding	5.58758	7.04295	23.3935	19.3092	11.2649	14.8485	8.05463	9.18951	11.873	9.12759
G1S	ENSG00000153930	ANKFN1	protein_coding	0.237499	0.221228	2.06272	1.88165	1.37297	1.33496	0.565354	0.782378	0.560358	0.416655
G1S	ENSG00000153982	GDPD1	protein_coding	1.91768	1.92764	6.02547	9.2796	3.54973	3.40456	3.94779	3.53658	3.24484	3.39966
G1S	ENSG00000154080	CHST9	protein_coding	0.020584	0.074412	0.140033	0.189776	0.100261	0.217441	0.070556	0.148397	0.11805	0.076007
G1S	ENSG00000154274	C4orf19	protein_coding	2.36642	2.6797	15.6806	16.7948	9.3142	10.3521	6.53515	7.26638	4.01442	3.66473
G1S	ENSG00000154330	PGM5	protein_coding	3.60823	3.50166	11.0922	10.1197	6.71643	6.89123	3.64197	4.36482	3.41029	3.06567
G1S	ENSG00000154760	SLFN13	protein_coding	1.10426	0.994039	5.98414	6.39787	3.07025	2.79047	2.22486	1.99807	0.997193	1.30905
G1S	ENSG00000154917	RAB6B	protein_coding	7.20245	4.3508	11.806	13.6158	5.97273	7.65656	3.56422	3.26443	5.15566	7.11486
G1S	ENSG00000155330	C16orf87	protein_coding	7.04858	7.04921	14.8291	15.9851	7.70498	9.90909	11.0822	10.288	12.6198	12.6055
G1S	ENSG00000156052	GNAQ	protein_coding	1.64523	1.61841	3.3083	3.61374	1.98967	2.17517	1.29329	1.31351	2.22559	1.97949
G1S	ENSG00000156689	GLYATL2	protein_coding	0.145372	0.050824	0.505681	0.700451	0.37644	0.465166	0.326555	0.298353	0.099091	0.253433
G1S	ENSG00000156869	FRRS1	protein_coding	7.9371	7.43842	16.0039	16.148	8.98788	8.98202	6.56206	5.80395	4.85534	5.21292
G1S	ENSG00000157152	SYN2	protein_coding	0.622876	0.570938	4.53071	4.72224	2.6156	2.56242	1.98966	1.76154	1.07582	1.09362
G1S	ENSG00000157353	FUK	protein_coding	1.79235	1.86173	6.21736	4.75215	2.91639	2.84044	3.34974	3.48877	3.39785	4.30372
G1S	ENSG00000157514	TSC22D3	protein_coding	5.59987	5.4614	10.6435	11.0427	4.64885	5.25374	4.12451	4.62529	6.0515	6.38062
G1S	ENSG00000157851	DPYSL5	protein_coding	1.70313	1.27246	5.7558	3.44184	2.1799	2.98919	1.61226	1.39057	1.79114	3.12421
G1S	ENSG00000157873	TNFRSF14	protein_coding	0.850742	0.621863	4.90649	3.16041	2.43098	1.87114	2.13069	2.08623	0.938995	0.9606
G1S	ENSG00000157978	LDLRAP1	protein_coding	5.3916	5.57789	20.6825	27.9877	10.6082	11.9186	9.15805	14.2185	15.8617	19.1494
G1S	ENSG00000158055	GRHL3	protein_coding	0.192043	0.158041	1.55188	1.56814	0.337645	0.413822	0.53258	0.518508	0.036592	0.082521
G1S	ENSG00000158079	PTPDC1	protein_coding	4.7582	4.31902	10.1872	10.1086	4.93808	5.37281	6.22739	5.90554	6.74479	7.28468
G1S	ENSG00000158106	RHPN1	protein_coding	1.39583	1.50873	29.3956	22.8689	16.7263	14.8761	13.0955	15.5063	3.95862	4.77916
G1S	ENSG00000158156	XKR8	protein_coding	0.063623	0.041642	1.77531	1.34622	0.516941	0.390588	0.24237	0.459506	0.095082	0.126184
G1S	ENSG00000158220	ESYT3	protein_coding	1.18507	1.11288	2.98978	2.5103	1.56048	1.61457	1.27752	1.34773	0.789702	1.09322
G1S	ENSG00000158813	EDA	protein_coding	1.09523	1.75667	5.68767	2.78873	0.843029	0.980832	3.07881	1.37792	0.540841	1.48579
G1S	ENSG00000159259	CHAF1B	protein_coding	11.2342	11.2759	27.4523	27.014	17.1113	20.3352	12.2628	12.9583	11.4666	11.424
G1S	ENSG00000159921	GNE	protein_coding	12.5217	12.4531	37.0954	28.3515	15.9887	16.9281	20.5381	16.0631	19.1263	19.3149
G1S	ENSG00000160094	ZNF362	protein_coding	3.32809	3.39757	17.7101	16.2855	11.4323	10.1979	6.88723	6.44642	9.55339	10.1441
G1S	ENSG00000160219	GAB3	protein_coding	0.86382	1.02465	3.23443	1.86386	0.892082	1.37907	2.2685	2.42314	1.39224	1.35288
G1S	ENSG00000160298	C21orf58	protein_coding	3.39785	3.85837	33.1027	21.8667	16.48	14.1411	13.3494	21.8571	10.8073	8.14549
G1S	ENSG00000160401	CFAP157	protein_coding	0.049682	0.04723	0.106571	0.216681	0.072468	0.074872	0.044418	0.183035	0.04184	0.049943
G1S	ENSG00000161277	THAP8	protein_coding	2.21114	1.70978	7.11651	5.87672	2.63604	2.04554	2.40915	2.5332	4.62461	4.89752
G1S	ENSG00000161509	GRIN2C	protein_coding	0.350036	0.534122	1.96526	1.62271	0.550815	0.406684	0.999027	1.21406	0.512908	0.535224
G1S	ENSG00000161682	FAM171A2	protein_coding	7.39751	6.4047	18.7219	17.9856	11.3349	9.72539	7.48517	6.33129	7.60563	8.97243
G1S	ENSG00000161888	SPC24	protein_coding	5.27909	4.24008	33.1945	33.258	19.7576	20.7861	16.368	17.7572	14.6141	14.1572
G1S	ENSG00000161992	PRR35	protein_coding	0.089938	0.096912	0.442987	0.369675	0.266208	0.170614	0.036878	0.093512	0.041856	0.096049
G1S	ENSG00000162062	TEDC2	protein_coding	9.15693	9.61131	23.0953	22.6936	12.0721	14.0653	12.9741	12.4191	13.7978	15.0636
G1S	ENSG00000162065	TBC1D24	protein_coding	3.477	3.95178	9.35462	7.64234	7.03161	8.1512	7.07707	8.98282	6.74131	7.11593
G1S	ENSG00000162066	AMDHD2	protein_coding	13.9235	17.0412	30.5975	25.4745	16.5597	15.837	17.7708	18.8845	9.31526	10.8509
G1S	ENSG00000162068	NTN3	protein_coding	0.164214	0.170061	0.634371	0.744599	0.487717	0.169149	0.186105	0.308921	0.118093	0.256754
G1S	ENSG00000162104	ADCY9	protein_coding	4.71236	4.62515	9.42923	10.759	6.10244	6.23622	5.92764	6.07322	5.75641	6.1232
G1S	ENSG00000162415	ZSWIM5	protein_coding	0.129518	0.239183	0.593631	0.430653	0.298005	0.295616	0.57389	0.323802	0.136384	0.124691
G1S	ENSG00000162437	RAVER2	protein_coding	8.05076	8.33968	19.6531	18.6009	10.2815	10.2205	7.54741	7.20709	13.5701	13.7383
G1S	ENSG00000162496	DHRS3	protein_coding	1.14585	1.17202	4.58624	4.43953	2.7618	2.83509	2.19323	1.82577	0.5508	0.93414
G1S	ENSG00000162572	SCNN1D	protein_coding	0.137075	0.149635	3.19963	2.29382	1.81302	1.47154	1.49906	2.01177	0.841765	0.969155
G1S	ENSG00000162599	NFIA	protein_coding	2.38988	1.69762	10.1343	14.3037	4.72997	5.23995	7.66401	7.61284	5.35975	6.39393
G1S	ENSG00000162643	WDR63	protein_coding	0.176849	0.282278	1.14751	1.53585	0.398916	0.707758	0.476487	0.427877	0.148614	0.177759
G1S	ENSG00000162687	KCNT2	protein_coding	0.165505	0.225243	1.38198	1.2153	0.766181	0.769132	0.281585	0.367975	0.266387	0.228001
G1S	ENSG00000162733	DDR2	protein_coding	10.2524	7.63155	38.9882	51.1484	22.659	22.2994	16.047	15.8283	16.7713	12.7646
G1S	ENSG00000162782	TDRD5	protein_coding	1.19244	1.31056	2.8968	3.30059	1.50074	1.57241	1.29986	1.17529	0.740256	0.777075
G1S	ENSG00000162981	FAM84A	protein_coding	0.93656	0.987981	2.05859	2.08585	0.895067	0.90212	1.08685	1.09571	0.430067	0.490942
G1S	ENSG00000162989	KCNJ3	protein_coding	0.116007	0.032359	0.181239	0.219466	0.075352	0.056718	0.075015	0.014395	0	0.014327
G1S	ENSG00000162997	PRORSD1P	transcribed_unitary_pseudogene	1.62282	1.67931	3.63004	3.31881	1.76606	1.8395	1.17235	1.05173	0.374273	0.392626
G1S	ENSG00000163285	GABRG1	protein_coding	0.474287	0.422447	2.08824	2.2318	1.20557	1.33954	0.404437	0.36072	0.479215	0.306897
G1S	ENSG00000163328	GPR155	protein_coding	1.55458	1.54876	4.2226	4.12916	2.48546	2.58404	2.47388	1.97816	0.89061	0.993302
G1S	ENSG00000163406	SLC15A2	protein_coding	0.271172	0.129753	0.694304	0.450289	0.249823	0.362012	0.15878	0.219877	0.099809	0.144501
G1S	ENSG00000163491	NEK10	protein_coding	7.00761	6.57189	22.6631	23.8297	8.99487	10.8562	10.0615	9.2351	10.8261	8.19096
G1S	ENSG00000163517	HDAC11	protein_coding	6.87415	6.45224	15.8237	14.556	8.45674	9.74796	6.68595	8.26409	10.0039	12.8762
G1S	ENSG00000163629	PTPN13	protein_coding	7.48527	7.2237	18.0367	20.9159	9.40646	9.76851	8.60155	8.34377	10.7694	10.23
G1S	ENSG00000163633	C4orf36	protein_coding	1.61467	1.12323	3.5159	2.44982	2.76376	1.93667	0.968941	1.56925	1.41931	0.707185
G1S	ENSG00000163694	RBM47	protein_coding	1.13207	0.922251	1.87154	1.98806	1.08249	1.34127	1.98926	1.03936	1.20393	1.07743
G1S	ENSG00000163840	DTX3L	protein_coding	8.72721	9.08323	35.2184	37.1948	17.5031	18.5057	19.5981	19.842	12.8638	13.5176
G1S	ENSG00000163864	NMNAT3	protein_coding	0.491218	0.459825	1.74985	1.14113	0.7725	0.494352	0.299996	0.254156	0.28942	0.302901
G1S	ENSG00000164061	BSN	protein_coding	0.006521	0.006763	0.177673	0.282225	0.104841	0.118832	0.077087	0.086936	0.042811	0.085553
G1S	ENSG00000164220	F2RL2	protein_coding	20.6676	21.3678	46.7751	44.3166	23.6364	24.181	21.5319	22.2475	14.7057	14.9265
G1S	ENSG00000164266	SPINK1	protein_coding	0.010621	0	0.30711	0.329011	0.058108	0	0.06391	0.307401	0	0
G1S	ENSG00000164342	TLR3	protein_coding	0.424799	0.403211	2.69388	3.04603	0.808379	0.878763	1.01418	0.929197	0.204088	0.244545
G1S	ENSG00000164542	KIAA0895	protein_coding	3.55503	3.05828	6.65932	7.15346	3.35454	2.87562	3.13917	3.24778	3.07753	3.28601
G1S	ENSG00000164796	CSMD3	protein_coding	0.429385	0.505574	6.15017	5.97475	3.65875	3.757	6.93659	5.39152	1.58351	1.2276
G1S	ENSG00000164938	TP53INP1	protein_coding	7.36499	6.26061	19.924	18.6192	4.74972	4.17126	5.66441	6.15009	1.83918	1.94079
G1S	ENSG00000165113	GKAP1	protein_coding	6.9811	7.12467	16.0706	14.9961	7.16229	6.3765	7.93589	6.34313	11.3386	11.1804
G1S	ENSG00000165152	TMEM246	protein_coding	4.53417	4.95157	17.5332	17.1783	10.2749	9.94192	5.43109	5.15811	5.85203	6.8242
G1S	ENSG00000165325	DEUP1	protein_coding	0.137186	0.030135	0.648637	0.661322	0.452896	0.320628	0.3281	0.189612	0.216783	0.193941
G1S	ENSG00000165617	DACT1	protein_coding	7.81504	7.3108	29.5802	31.7465	13.8696	14.6535	13.0766	9.76093	8.77886	10.6551
G1S	ENSG00000165731	RET	protein_coding	0.082112	0.004228	0.767515	0.589338	0.463617	0.569379	0.211422	0.166416	0.034192	0.027665
G1S	ENSG00000165943	MOAP1	protein_coding	6.69631	4.24204	17.0122	15.9122	9.98242	6.83892	7.04342	8.4307	6.19114	7.11523
G1S	ENSG00000165959	CLMN	protein_coding	1.80846	1.99648	5.48248	8.76993	2.25154	3.2067	1.92516	3.06275	3.40725	3.62039
G1S	ENSG00000165995	CACNB2	protein_coding	0.187767	0.122355	1.81269	2.26235	0.890783	0.723164	0.817043	0.53633	0.888578	0.706993
G1S	ENSG00000166123	GPT2	protein_coding	19.0242	20.4267	39.9528	39.6188	26.3653	26.4129	15.8519	17.4823	24.1412	25.5355
G1S	ENSG00000166145	SPINT1	protein_coding	0.037952	0	0.288887	0.129927	0.166229	0.197603	0.144494	0.11071	0.00755	0.057634
G1S	ENSG00000166349	RAG1	protein_coding	0.505793	0.363843	1.15051	1.07118	0.591263	0.43357	0.654606	0.481817	0.441647	0.662335
G1S	ENSG00000166402	TUB	protein_coding	12.0788	12.1362	39.9662	41.2819	25.1791	26.4639	17.3362	18.925	17.7372	18.3964
G1S	ENSG00000166448	TMEM130	protein_coding	0.086097	0.208068	1.77574	1.12923	0.660277	0.730192	0.539188	0.602384	0.369514	0.375272
G1S	ENSG00000166473	PKD1L2	polymorphic_pseudogene	1.40355	0.867016	7.13216	5.51482	2.81989	2.4493	1.90603	2.22278	0.792771	0.873017
G1S	ENSG00000166578	IQCD	protein_coding	0.777627	0.778919	3.92628	3.50765	2.60014	2.42553	2.16677	2.37226	1.79634	1.73573
G1S	ENSG00000166801	FAM111A	protein_coding	6.96487	7.2446	44.1041	49.1082	27.5739	27.715	58.8037	24.973	19.2682	18.8978
G1S	ENSG00000166816	LDHD	protein_coding	0.069802	0.060743	0.584036	0.254752	0.248382	0.182644	0.180513	0.103937	0.116648	0.164631
G1S	ENSG00000166823	MESP1	protein_coding	0.285769	0.205435	0.625151	0.788362	0.406476	0.286662	0.162594	0.127495	0.210354	0.215908
G1S	ENSG00000166840	GLYATL1	protein_coding	0.732645	0.693983	1.87751	2.36345	1.01948	0.848098	0.699456	0.480631	0.606563	0.436517
G1S	ENSG00000166869	CHP2	protein_coding	0.23025	0.196865	0.69023	0.474157	0.262201	0.349693	0.200628	0.165805	0.32051	0.284781
G1S	ENSG00000167103	PIP5KL1	protein_coding	1.68993	1.39796	9.89036	8.91392	3.68584	5.31508	2.6797	4.5163	0.964309	1.46074
G1S	ENSG00000167191	GPRC5B	protein_coding	1.85225	1.97937	5.18445	5.23783	3.98585	2.98177	1.84398	1.99423	1.07227	1.3566
G1S	ENSG00000167216	KATNAL2	protein_coding	0.179188	0.116017	1.03352	0.605805	0.402204	0.622765	0.583777	0.34313	0.418073	0.136993
G1S	ENSG00000167280	ENGASE	protein_coding	5.76018	6.05679	30.3461	24.0814	14.4692	12.0998	15.4815	18.0087	8.65227	10.5397
G1S	ENSG00000167333	TRIM68	protein_coding	8.16229	7.94559	14.5665	15.6892	9.1741	9.45295	8.60416	8.58172	9.25085	9.36109
G1S	ENSG00000167535	CACNB3	protein_coding	19.8213	19.9185	38.347	42.1287	28.1792	25.5023	20.1218	23.1529	26.8711	29.1559
G1S	ENSG00000167536	DHRS13	protein_coding	4.09003	3.2004	23.8032	20.1405	10.3555	9.26467	7.42397	6.64128	6.89871	6.59862
G1S	ENSG00000167549	CORO6	protein_coding	0.005316	0.076305	0.312697	0.253249	0.090451	0.055217	0.066974	0.055048	0.030278	0.027649
G1S	ENSG00000167964	RAB26	protein_coding	1.07908	0.866194	6.1124	4.70325	3.58266	2.71047	2.29312	1.92721	1.0067	1.48456
G1S	ENSG00000167995	BEST1	protein_coding	0.083948	0.080968	0.607153	0.604085	0.559267	0.42242	0.139378	0.343181	0.10667	0.096192
G1S	ENSG00000168061	SAC3D1	protein_coding	18.2489	15.7133	31.7438	29.6343	21.2684	19.7643	21.3862	20.6137	14.3499	15.1059
G1S	ENSG00000168255	POLR2J3	protein_coding	19.0522	22.3399	32.412	30.4897	27.5848	25.394	24.1732	22.1192	29.8278	32.5146
G1S	ENSG00000168297	PXK	protein_coding	11.9084	12.0432	20.2903	21.0845	12.6981	13.5143	11.7378	10.4887	16.7351	15.3913
G1S	ENSG00000168310	IRF2	protein_coding	6.48064	5.79942	11.7036	14.4601	6.34639	6.59098	8.892	6.66937	9.29981	7.36717
G1S	ENSG00000168484	SFTPC	protein_coding	0	0.153492	0.284692	0.488	0.177714	0.149277	0.134305	0.117414	0.022205	0.102793
G1S	ENSG00000168675	LDLRAD4	protein_coding	1.25154	1.3477	6.8102	9.73866	5.706	5.07362	6.92387	6.4435	3.27902	3.71544
G1S	ENSG00000168763	CNNM3	protein_coding	10.1531	10.1558	24.3782	24.0539	15.2874	15.1079	14.0222	11.9968	11.9905	12.2731
G1S	ENSG00000168779	SHOX2	protein_coding	9.62871	8.63187	18.4502	17.9952	11.7267	11.9269	7.90296	6.37412	7.10441	5.49472
G1S	ENSG00000168792	ABHD15	protein_coding	3.22897	3.22169	16.3402	14.6873	9.49588	8.74163	5.46245	5.46565	4.88469	5.46329
G1S	ENSG00000168939	SPRY3	protein_coding	0.379388	0.325209	1.17443	1.00065	0.653753	0.603431	0.652212	0.683676	0.165277	0.118598
G1S	ENSG00000168959	GRM5	protein_coding	0.012876	0.008852	0.130982	0.214073	0.084196	0.132708	0.076404	0.060179	0.112211	0.133987
G1S	ENSG00000168970	JMJD7-PLA2G4B	protein_coding	1.07367	1.60009	2.48682	2.44954	1.71971	1.12749	1.1175	1.6469	1.91419	2.19966
G1S	ENSG00000169064	ZBBX	protein_coding	0.021631	0.264594	0.560096	0.613954	0.234384	0.072367	0.13128	0.050234	0.014269	0.031833
G1S	ENSG00000169083	AR	protein_coding	0.900972	1.56562	4.21857	1.89603	2.83149	2.78642	1.07201	2.92163	2.08946	2.20128
G1S	ENSG00000169193	CCDC126	protein_coding	4.83896	4.0677	12.2319	11.1232	7.4005	7.78312	6.35562	6.75324	6.67646	7.13526
G1S	ENSG00000169302	STK32A	protein_coding	2.94926	2.2912	9.50773	9.20736	3.8591	3.28861	3.91715	3.30187	1.0009	0.921982
G1S	ENSG00000169668	BCRP2	transcribed_unprocessed_pseudogene	0.041167	0.033265	0.150735	0.187961	0.058909	0.056141	0.020834	0.027428	0.012563	0.050394
G1S	ENSG00000169683	LRRC45	protein_coding	6.08007	5.62066	38.1382	34.1626	20.7007	19.5284	16.9673	19.2301	12.6491	13.7426
G1S	ENSG00000169750	RAC3	protein_coding	1.47144	2.04945	14.0819	10.7495	6.11606	4.93095	5.84099	6.57078	3.68342	4.27596
G1S	ENSG00000169758	TMEM266	protein_coding	0.029848	0.102983	0.348616	0.302285	0.1424	0.12816	0.159325	0.122385	0.118279	0.111718
G1S	ENSG00000169871	TRIM56	protein_coding	13.2248	13.846	26.2206	25.1482	16.7405	15.1864	15.3172	17.9107	17.7466	20.4069
G1S	ENSG00000169894	MUC3A	protein_coding	1.69697	2.30279	6.07546	5.16574	3.18724	3.86828	3.75326	3.45851	2.51605	2.05348
G1S	ENSG00000169918	OTUD7A	protein_coding	0.118115	0.378307	1.11502	0.62788	0.672838	0.565914	0.546338	0.533619	0.559728	0.655332
G1S	ENSG00000170011	MYRIP	protein_coding	0.110516	0.105122	0.357038	0.367243	0.178744	0.180349	0.153061	0.134356	0.285243	0.238645
G1S	ENSG00000170271	FAXDC2	protein_coding	0.341335	0.313524	1.19702	1.78777	0.375843	0.364437	0.410233	0.291119	0.103441	0.066257
G1S	ENSG00000170276	HSPB2	protein_coding	3.47989	3.47093	7.84456	9.54886	5.35733	6.13669	5.88192	6.35389	4.42052	5.3337
G1S	ENSG00000170456	DENND5B	protein_coding	9.59049	9.18601	21.1644	26.2234	15.1288	16.8305	18.0578	16.0828	18.8125	18.6487
G1S	ENSG00000170743	SYT9	protein_coding	0.218593	0.254995	1.35975	1.49616	0.71002	0.591322	0.498584	0.649602	0.389331	0.285582
G1S	ENSG00000170775	GPR37	protein_coding	1.20865	1.15123	2.70001	3.15879	1.4101	1.31868	0.812988	0.857543	0.493398	0.603289
G1S	ENSG00000170827	CELP	transcribed_unprocessed_pseudogene	0.256737	0	0.524864	0.030554	0.374322	0.042737	0.494264	0	0	0
G1S	ENSG00000171105	INSR	protein_coding	0.657737	0.707703	4.40138	4.51034	2.8061	2.64665	1.73267	1.6654	0.945672	0.911446
G1S	ENSG00000171119	NRTN	protein_coding	1.50513	1.0701	3.48923	3.5679	2.1379	1.91985	0.702678	1.02844	1.48184	2.08434
G1S	ENSG00000171121	KCNMB3	protein_coding	1.14593	1.31528	2.76479	2.9257	1.69835	1.16769	1.66062	1.68917	1.08366	0.755125
G1S	ENSG00000171126	KCNG3	protein_coding	0.695999	0.886101	2.73421	2.57982	1.67215	1.60114	0.888717	0.946	0.887807	1.10915
G1S	ENSG00000171227	TMEM37	protein_coding	1.50284	1.21364	7.94981	10.923	4.30164	2.52147	2.74562	2.71281	2.13353	4.54151
G1S	ENSG00000171291	ZNF439	protein_coding	1.57483	1.32559	3.49239	3.63757	1.28297	1.97376	2.5365	2.91208	1.75982	1.83846
G1S	ENSG00000171320	ESCO2	protein_coding	4.47709	4.03402	27.3924	29.6064	16.3113	18.0614	17.9446	21.9376	11.9961	12.1489
G1S	ENSG00000171777	RASGRP4	protein_coding	0.434126	0.430138	2.15265	2.42181	1.76784	1.48399	1.36663	1.13198	0.969196	0.999685
G1S	ENSG00000172164	SNTB1	protein_coding	1.22419	1.10726	3.65896	5.07577	2.98424	2.24749	1.95497	1.978	2.42645	2.06049
G1S	ENSG00000172197	MBOAT1	protein_coding	2.3043	2.42134	7.04864	6.44299	3.4127	2.78518	1.97028	2.24683	1.1811	1.44423
G1S	ENSG00000172345	STARD5	protein_coding	0.861411	0.582822	4.67374	4.01045	2.24034	1.59612	1.2094	1.12754	0.84381	0.569157
G1S	ENSG00000172403	SYNPO2	protein_coding	0.084984	0.106378	0.427334	0.365514	0.184606	0.222338	0.162444	0.200048	0.045526	0.066137
G1S	ENSG00000172461	FUT9	protein_coding	0.21729	0.27676	1.31896	1.22704	0.575732	0.578062	0.618306	0.42509	0.130689	0.117221
G1S	ENSG00000172594	SMPDL3A	protein_coding	4.91387	4.27423	8.04312	8.56777	5.2204	5.63863	3.93655	4.2541	5.10743	3.39284
G1S	ENSG00000172687	ZNF738	protein_coding	2.64274	3.62058	10.9736	5.93747	2.94374	3.14148	3.50343	3.19407	0.862222	1.68334
G1S	ENSG00000172733	PURG	protein_coding	3.81709	2.41397	10.6659	11.3718	4.74439	4.8962	3.63489	1.65074	6.35964	5.73495
G1S	ENSG00000172915	NBEA	protein_coding	0.599242	0.577493	2.03305	2.10089	1.25479	1.47776	1.04516	1.20061	1.40277	1.38353
G1S	ENSG00000172969	FRG2C	protein_coding	0.033416	0.022563	0.366362	0.364779	0.15095	0.226685	0.091284	0.125247	0.216331	0.153014
G1S	ENSG00000173157	ADAMTS20	protein_coding	0.274822	0.257607	0.791772	0.758255	0.539375	0.397293	0.388876	0.330032	0.295058	0.237318
G1S	ENSG00000173208	ABCD2	protein_coding	0.027818	0.03056	0.222769	0.231031	0.106656	0.091234	0.06884	0.04773	0.029738	0.008117
G1S	ENSG00000173209	AHSA2P	transcribed_unitary_pseudogene	6.27075	5.73669	77.0424	46.2049	36.4982	41.5709	39.1271	55.5978	13.6677	15.6747
G1S	ENSG00000173262	SLC2A14	protein_coding	0.429352	0.437191	1.8736	1.23782	1.08426	1.06581	0.490259	0.911745	0.246498	0.28612
G1S	ENSG00000173320	STOX2	protein_coding	1.81106	2.11954	4.39055	4.14174	2.12956	2.27165	1.98813	1.47131	2.2077	2.44186
G1S	ENSG00000173531	MST1	protein_coding	0.191349	0.196424	1.98794	1.62698	0.926419	0.875253	1.07294	1.3152	0.628826	0.413919
G1S	ENSG00000173706	HEG1	protein_coding	12.9822	13.8696	62.4555	68.7609	44.2732	42.0485	34.7519	36.8783	35.8113	38.8919
G1S	ENSG00000173727	AP000769.1	transcribed_unprocessed_pseudogene	20.0543	18.3939	20.5534	36.1205	19.2574	18.9097	7.2446	18.1151	8.75555	18.3561
G1S	ENSG00000173926	2019-03-03	protein_coding	3.5678	3.27975	7.01489	6.98571	4.31176	5.244	3.01047	3.55406	2.96281	3.40513
G1S	ENSG00000173930	SLCO4C1	protein_coding	0.995938	0.952348	7.20118	8.16617	4.83326	4.56845	2.99444	2.0675	1.76185	1.84924
G1S	ENSG00000173988	LRRC63	protein_coding	0.057682	0.083359	0.469414	0.55718	0.135693	0.140552	0.041493	0.025642	0.143984	0.113293
G1S	ENSG00000174007	CEP19	protein_coding	2.7189	2.50551	4.9831	5.71236	2.45732	3.08539	2.58332	2.4109	3.07395	3.10842
G1S	ENSG00000174740	PABPC5	protein_coding	1.67304	1.67108	4.41315	5.18319	2.75569	2.72065	2.56733	2.36953	1.92737	1.64337
G1S	ENSG00000174951	FUT1	protein_coding	1.1595	1.43933	8.40205	7.45744	2.95701	3.79454	1.11795	1.26204	1.88643	1.53754
G1S	ENSG00000175093	SPSB4	protein_coding	1.11755	1.46925	10.5946	10.2406	2.53691	2.68266	1.25719	1.01013	1.7333	1.77572
G1S	ENSG00000175170	FAM182B	lincRNA	0.210973	0.175873	4.67973	6.1457	0.970927	2.46725	1.21789	0.91125	0.229124	0.325266
G1S	ENSG00000175305	CCNE2	protein_coding	11.857	12.5467	34.7648	35.9149	21.2083	22.0614	4.25666	5.01692	1.57162	1.74285
G1S	ENSG00000175318	GRAMD2A	protein_coding	0.038392	0.026745	0.494424	0.362865	0.177076	0.228439	0.039664	0.049369	0.007103	0.007729
G1S	ENSG00000175322	ZNF519	protein_coding	12.2502	11.3478	25.2001	27.9068	16.5151	12.404	17.3989	17.2239	17.4601	18.0013
G1S	ENSG00000175643	RMI2	protein_coding	8.08707	8.39219	31.2806	31.2616	19.0244	17.4781	11.1179	10.4561	5.85817	7.63565
G1S	ENSG00000175785	PRIMA1	protein_coding	0.084413	0.138889	0.75138	0.670766	0.315095	0.313025	0.097874	0.111913	0.191535	0.306
G1S	ENSG00000176046	NUPR1	protein_coding	17.3251	15.0597	58.5027	58.2529	30.9815	36.3216	19.5597	21.1626	22.4685	23.8547
G1S	ENSG00000176058	TPRN	protein_coding	7.14409	6.28437	17.5613	12.7408	8.42295	9.04794	10.5212	11.0754	9.92321	11.3006
G1S	ENSG00000176204	LRRTM4	protein_coding	0.024154	0.013299	0.89045	0.673911	0.096543	0.108726	0.011275	0.074624	0.006445	0.047922
G1S	ENSG00000176293	ZNF135	protein_coding	1.04022	0.768104	3.59877	3.72689	2.56298	2.02544	2.44164	2.62349	1.78115	1.55883
G1S	ENSG00000176383	B3GNT4	protein_coding	1.36649	1.28137	3.47913	3.4425	2.19918	1.77599	1.98063	1.62751	1.64515	1.46111
G1S	ENSG00000176428	VPS37D	protein_coding	1.70174	1.34415	3.89382	3.10503	1.38141	1.33037	2.29982	1.67658	1.1947	2.02683
G1S	ENSG00000176641	RNF152	protein_coding	3.11869	3.00813	5.17712	5.53755	3.26342	3.63607	2.05049	2.49445	1.09612	1.06601
G1S	ENSG00000176700	SCAND2P	transcribed_unprocessed_pseudogene	1.98974	2.88367	3.65461	3.63727	2.76073	2.35078	3.09332	3.27407	1.43865	1.93903
G1S	ENSG00000176714	CCDC121	protein_coding	2.25752	2.2852	5.59476	5.56514	3.80839	3.32231	2.84411	3.068	2.47559	2.51063
G1S	ENSG00000176826	FKBP9P1	transcribed_unprocessed_pseudogene	3.62863	3.9681	6.49145	7.09136	6.18457	7.08639	3.9893	4.62203	4.86234	4.53777
G1S	ENSG00000176834	VSIG10	protein_coding	10.3699	10.9623	34.611	37.5904	19.6434	19.2595	11.3188	11.0604	13.2591	15.867
G1S	ENSG00000176912	TYMSOS	bidirectional_promoter_lncRNA	3.38621	3.56773	9.07433	6.89274	5.54984	4.8888	3.66321	3.25914	2.79258	3.75123
G1S	ENSG00000176998	HCG4	unprocessed_pseudogene	3.06802	2.66478	5.4852	5.86038	3.0261	3.26184	1.71616	2.46156	2.92769	3.41513
G1S	ENSG00000177096	PHETA2	protein_coding	11.0309	11.1333	25.2713	25.1797	16.4671	17.7876	14.8755	16.0404	17.7251	20.4376
G1S	ENSG00000177595	PIDD1	protein_coding	5.44875	5.30208	21.5034	16.2248	10.0198	8.31986	7.74754	9.50633	4.20026	4.80128
G1S	ENSG00000177854	TMEM187	protein_coding	0.871559	0.772048	3.36923	2.53831	1.49734	1.50397	1.84048	1.12782	1.75104	2.02742
G1S	ENSG00000178026	LRRC75B	protein_coding	1.12534	1.27108	3.34036	3.97418	2.66342	2.35995	1.78035	2.66647	0.777734	0.830589
G1S	ENSG00000178033	CALHM5	protein_coding	0.42309	0.392528	1.66986	1.62122	0.871746	0.753282	1.01582	0.870424	0.282946	0.233155
G1S	ENSG00000178184	PARD6G	protein_coding	14.6461	14.2221	38.2618	37.9069	19.8142	19.4724	12.6701	13.9571	13.6697	14.7243
G1S	ENSG00000178662	CSRNP3	protein_coding	0.041025	0.192233	0.407856	0.380159	0.235839	0.080974	0.133461	0.361755	0.259812	0.032713
G1S	ENSG00000178685	PARP10	protein_coding	6.15354	5.01661	31.2695	25.2632	15.725	24.2304	20.211	21.4756	13.3884	6.03321
G1S	ENSG00000178761	FAM219B	protein_coding	6.0905	4.52319	17.2131	15.6308	11.0673	7.25542	10.7775	13.5605	7.96063	7.14437
G1S	ENSG00000178803	ADORA2A-AS1	antisense	0.009195	0.009388	0.141256	0.197044	0.079927	0.039759	0.031783	0	0.016284	0.013984
G1S	ENSG00000178809	TRIM73	protein_coding	0.947125	1.12924	2.98724	2.57251	2.39117	1.71023	2.15752	2.17581	0.837085	0.789794
G1S	ENSG00000178947	SMIM10L2A	protein_coding	0.168405	0.130126	0.866682	0.881661	0.491613	0.598635	0.264648	0.273898	0.133292	0.156193
G1S	ENSG00000179023	KLHDC7A	protein_coding	0.107818	0.113531	1.29723	1.22762	0.433305	0.317114	0.41044	0.417652	0.049176	0.06626
G1S	ENSG00000179029	TMEM107	protein_coding	4.33367	3.68833	18.9889	17.9403	11.24	10.9907	6.49254	7.03506	3.67428	4.998
G1S	ENSG00000179240	GVQW3	protein_coding	1.4483	1.90666	6.44822	8.70813	3.91157	2.93024	3.3537	3.44367	1.18585	1.57299
G1S	ENSG00000179284	DAND5	protein_coding	0	0.048931	0.27672	0.327951	0.144316	0.109011	0.047328	0.108628	0.020527	0.035892
G1S	ENSG00000179314	WSCD1	protein_coding	2.40869	2.09415	6.52501	6.09594	3.07362	3.64925	1.47311	1.67461	3.18225	3.20785
G1S	ENSG00000179397	CATSPERE	protein_coding	0.010777	0.020416	0.354986	0.310537	0.149014	0.059124	0.094479	0.152006	0.056232	0.014431
G1S	ENSG00000179571	NBPF17P	unprocessed_pseudogene	0	0	0.051292	0.063303	0.026193	0.024322	0	0.032377	0	0
G1S	ENSG00000179673	RPRML	protein_coding	0.265738	0.187817	0.833986	0.877349	0.474872	0.547825	0.380741	0.452056	0.458983	0.603383
G1S	ENSG00000179772	FOXS1	protein_coding	0.763173	0.660402	16.4045	15.7403	7.04497	5.79527	6.16681	4.31885	1.10268	1.50063
G1S	ENSG00000179841	AKAP5	protein_coding	2.57647	2.09214	10.8885	11.4217	4.60356	4.81738	2.7183	2.49385	2.13495	1.94099
G1S	ENSG00000179869	ABCA13	protein_coding	2.45585	2.99081	18.4046	18.1131	7.49964	6.99533	7.4529	6.8232	4.70991	4.76903
G1S	ENSG00000180347	ITPRID1	protein_coding	0.499265	0.283436	2.56825	2.54451	1.32799	1.59479	1.13066	1.14698	1.83109	1.90037
G1S	ENSG00000180440	SERTM1	protein_coding	0.078715	0.170629	0.910056	0.991213	0.249746	0.351816	0.135284	0.157243	0.311405	0.352008
G1S	ENSG00000180871	CXCR2	protein_coding	0.039826	0.016648	0.47365	0.257139	0.078611	0.124328	0.124149	0.147228	0	0.033177
G1S	ENSG00000181035	SLC25A42	protein_coding	1.31546	1.57699	5.19387	5.22167	2.71373	2.55606	2.57269	2.46187	3.04236	3.59696
G1S	ENSG00000181104	F2R	protein_coding	21.7821	21.1991	46.8717	44.3822	30.1319	27.0789	25.6518	22.8257	20.3933	22.2924
G1S	ENSG00000181126	HLA-V	transcribed_unprocessed_pseudogene	0.201591	0.407934	3.31606	3.06689	1.07478	0.800788	0.522256	0.641278	0.228919	0.496824
G1S	ENSG00000181350	LRRC75A	protein_coding	0.800017	0.955731	3.8197	3.88091	2.27564	1.89366	0.905866	0.864002	1.41063	1.3824
G1S	ENSG00000181481	RNF135	protein_coding	1.64986	2.32115	5.01472	5.65559	3.78698	3.35851	3.02786	2.5315	3.70461	3.57785
G1S	ENSG00000181513	ACBD4	protein_coding	2.25792	2.55733	10.2483	9.07905	5.68453	4.8841	4.87279	5.08261	4.33541	4.29974
G1S	ENSG00000181690	PLAG1	protein_coding	5.49155	6.06673	10.2386	8.92647	6.21394	4.92383	7.05687	6.32723	3.06753	2.75862
G1S	ENSG00000181982	CCDC149	protein_coding	1.28765	1.08465	2.14119	2.33113	1.34147	1.57278	1.04286	1.29	1.69461	1.6632
G1S	ENSG00000182165	TP53TG1	lincRNA	4.905	4.34028	8.05804	8.73326	5.40256	5.84859	4.05345	3.75987	4.3167	3.51294
G1S	ENSG00000182175	RGMA	protein_coding	3.03174	2.17881	8.68928	8.65783	6.97613	2.85783	2.68216	2.74162	1.94595	3.73567
G1S	ENSG00000182255	KCNA4	protein_coding	0.183198	0.188392	0.498695	0.579212	0.33332	0.273121	0.19917	0.185617	0.410547	0.241857
G1S	ENSG00000182263	FIGN	protein_coding	3.67214	3.97132	9.66207	9.59569	4.61006	4.13247	7.97293	7.89144	6.34423	5.74348
G1S	ENSG00000182902	SLC25A18	protein_coding	0.020886	0.104365	0.610805	0.484201	0.327788	0.233221	0.133593	0.091848	0.04232	0.033676
[truncated: 3,163 more rows]

## Sheet: 2044_phase_specific_lncRNAs
phase	ensemble_id	gene_names	bio_type
G1	ENSG00000175302	ANKRD30BP1	unprocessed_pseudogene
G1	ENSG00000175841	FAM172BP	processed_pseudogene
G1	ENSG00000176318	FOXN3P1	processed_pseudogene
G1	ENSG00000176593	AC008969.1	processed_transcript
G1	ENSG00000177173	NAP1L4P1	processed_pseudogene
G1	ENSG00000178440	LINC00843	lincRNA
G1	ENSG00000178636	AC092656.1	transcribed_processed_pseudogene
G1	ENSG00000178977	LINC00324	lincRNA
G1	ENSG00000179219	LINC00311	lincRNA
G1	ENSG00000179935	LINC00652	lincRNA
G1	ENSG00000183154	AC138356.1	antisense
G1	ENSG00000186019	AC021092.1	antisense
G1	ENSG00000189149	CRYM-AS1	transcribed_unitary_pseudogene
G1	ENSG00000196756	SNHG17	processed_transcript
G1	ENSG00000197182	MIRLET7BHG	lincRNA
G1	ENSG00000197588	KLKP1	transcribed_unprocessed_pseudogene
G1	ENSG00000198312	BMS1P9	unprocessed_pseudogene
G1	ENSG00000203335	AC006019.1	antisense
G1	ENSG00000203435	E2F3P2	processed_pseudogene
G1	ENSG00000203688	LINC02487	lincRNA
G1	ENSG00000204460	LINC01854	lincRNA
G1	ENSG00000204625	HCG9	lincRNA
G1	ENSG00000204876	AC021218.1	lincRNA
G1	ENSG00000204915	AC234772.1	processed_pseudogene
G1	ENSG00000204993	AC139712.1	processed_pseudogene
G1	ENSG00000205485	AC004980.1	transcribed_unprocessed_pseudogene
G1	ENSG00000205534	SMG1P2	unprocessed_pseudogene
G1	ENSG00000205830	AC024132.1	lincRNA
G1	ENSG00000206337	HCP5	sense_overlapping
G1	ENSG00000206448	PPIAP30	processed_pseudogene
G1	ENSG00000206573	THUMPD3-AS1	antisense
G1	ENSG00000213060	AL031864.1	processed_pseudogene
G1	ENSG00000213144	AC084880.1	processed_pseudogene
G1	ENSG00000213232	PPP1R2P10	processed_pseudogene
G1	ENSG00000213453	FTH1P3	processed_pseudogene
G1	ENSG00000213513	IMPDH1P5	processed_pseudogene
G1	ENSG00000213997	PGAM1P7	processed_pseudogene
G1	ENSG00000214093	AL096701.1	processed_pseudogene
G1	ENSG00000214331	AC009053.1	transcribed_unprocessed_pseudogene
G1	ENSG00000214875	MED28P1	processed_pseudogene
G1	ENSG00000215105	TTC3P1	processed_pseudogene
G1	ENSG00000215120	AL590763.1	processed_pseudogene
G1	ENSG00000215154	AC141586.1	transcribed_unprocessed_pseudogene
G1	ENSG00000215156	AC138409.1	processed_pseudogene
G1	ENSG00000215284	AL512633.1	processed_pseudogene
G1	ENSG00000215354	FAM90A24P	transcribed_unprocessed_pseudogene
G1	ENSG00000215388	ACTG1P3	processed_pseudogene
G1	ENSG00000215417	MIR17HG	processed_transcript
G1	ENSG00000215840	AL592295.1	processed_pseudogene
G1	ENSG00000215861	AC245297.1	unprocessed_pseudogene
G1	ENSG00000215875	ST13P20	transcribed_processed_pseudogene
G1	ENSG00000217159	LARP1P1	processed_pseudogene
G1	ENSG00000217275	AL031777.1	processed_pseudogene
G1	ENSG00000217801	AL390719.1	transcribed_unprocessed_pseudogene
G1	ENSG00000218109	KIRREL3-AS3	antisense
G1	ENSG00000219470	AL355802.1	processed_pseudogene
G1	ENSG00000221949	LINC01465	lincRNA
G1	ENSG00000223356	AL590666.1	antisense
G1	ENSG00000223390	AL445685.1	antisense
G1	ENSG00000223461	AC004471.1	antisense
G1	ENSG00000223599	AL513523.1	processed_pseudogene
G1	ENSG00000223692	DIP2A-IT1	sense_intronic
G1	ENSG00000223760	MED15P9	transcribed_unprocessed_pseudogene
G1	ENSG00000223773	CD99P1	transcribed_unprocessed_pseudogene
G1	ENSG00000223959	AFG3L1P	transcribed_unitary_pseudogene
G1	ENSG00000224032	EPB41L4A-AS1	lincRNA
G1	ENSG00000224080	UBE2FP1	processed_pseudogene
G1	ENSG00000224083	MTCO1P11	unprocessed_pseudogene
G1	ENSG00000224255	PDCL3P6	processed_pseudogene
G1	ENSG00000224271	AL117329.1	lincRNA
G1	ENSG00000224675	AC009227.1	antisense
G1	ENSG00000224679	MED15P4	unprocessed_pseudogene
G1	ENSG00000224680	PLA2G12AP1	processed_pseudogene
G1	ENSG00000224967	AC009303.1	processed_pseudogene
G1	ENSG00000225205	AC078883.1	antisense
G1	ENSG00000225206	MIR137HG	lincRNA
G1	ENSG00000225213	AC073367.1	sense_intronic
G1	ENSG00000225330	AF064860.1	sense_overlapping
G1	ENSG00000225448	AC009477.1	processed_pseudogene
G1	ENSG00000225450	AL021707.1	antisense
G1	ENSG00000225578	NCBP2-AS1	antisense
G1	ENSG00000225655	BX255923.1	lincRNA
G1	ENSG00000225813	AC009299.1	processed_pseudogene
G1	ENSG00000226380	LINC-PINT	lincRNA
G1	ENSG00000226396	AL031727.1	processed_pseudogene
G1	ENSG00000226581	AC092634.3	lincRNA
G1	ENSG00000226652	PSMD10P2	transcribed_processed_pseudogene
G1	ENSG00000226767	AC114501.1	processed_pseudogene
G1	ENSG00000226954	AL023802.1	lincRNA
G1	ENSG00000226981	ABHD17AP6	unprocessed_pseudogene
G1	ENSG00000227014	AC007285.1	antisense
G1	ENSG00000227053	AC105446.1	antisense
G1	ENSG00000227210	AC079145.1	antisense
G1	ENSG00000227258	SMIM2-AS1	antisense
G1	ENSG00000227267	AC072039.1	processed_pseudogene
G1	ENSG00000227376	FTH1P16	processed_pseudogene
G1	ENSG00000227379	PPIAP2	processed_pseudogene
G1	ENSG00000227698	AP001619.1	sense_intronic
G1	ENSG00000227777	AL031736.1	processed_pseudogene
G1	ENSG00000227910	AC092634.4	transcribed_processed_pseudogene
G1	ENSG00000227963	RBM15-AS1	antisense
G1	ENSG00000228005	AC020743.1	antisense
G1	ENSG00000228124	AL096678.1	antisense
G1	ENSG00000228158	TLE1P1	processed_pseudogene
G1	ENSG00000228184	SNX19P1	processed_pseudogene
G1	ENSG00000228192	AL512353.1	antisense
G1	ENSG00000228201	AL022341.1	antisense
G1	ENSG00000228294	BMS1P17	transcribed_unprocessed_pseudogene
G1	ENSG00000228412	AL022068.1	antisense
G1	ENSG00000228485	GRK5-IT1	sense_intronic
G1	ENSG00000228527	AC016396.1	lincRNA
G1	ENSG00000228606	AL139011.1	antisense
G1	ENSG00000228615	AC093166.2	processed_pseudogene
G1	ENSG00000228709	LINC02575	lincRNA
G1	ENSG00000228817	BACH1-IT2	lincRNA
G1	ENSG00000229107	ABHD17AP4	processed_pseudogene
G1	ENSG00000229124	VIM-AS1	antisense
G1	ENSG00000229222	KRT18P4	processed_pseudogene
G1	ENSG00000229419	RALGAPA1P1	processed_pseudogene
G1	ENSG00000229473	RGS17P1	processed_pseudogene
G1	ENSG00000229587	AL158825.2	sense_intronic
G1	ENSG00000229808	AL391825.1	transcribed_processed_pseudogene
G1	ENSG00000230002	ALMS1-IT1	sense_intronic
G1	ENSG00000230071	RPL4P6	processed_pseudogene
G1	ENSG00000230149	AL021707.3	antisense
G1	ENSG00000230176	LINC01433	antisense
G1	ENSG00000230450	NEK2P4	processed_pseudogene
G1	ENSG00000230532	AC091133.1	antisense
G1	ENSG00000230581	ACTG1P14	processed_pseudogene
G1	ENSG00000230844	ZNF674-AS1	lincRNA
G1	ENSG00000230898	AL596087.2	sense_intronic
G1	ENSG00000230914	AC004840.1	transcribed_unitary_pseudogene
G1	ENSG00000230922	AL079301.1	sense_intronic
G1	ENSG00000230955	AL929472.2	antisense
G1	ENSG00000230987	AL359976.1	processed_pseudogene
G1	ENSG00000231023	LINC00326	lincRNA
G1	ENSG00000231154	MORF4L2-AS1	antisense
G1	ENSG00000231177	LINC00852	antisense
G1	ENSG00000231233	CFAP58-DT	antisense
G1	ENSG00000231290	APCDD1L-DT	processed_transcript
G1	ENSG00000231565	NEK2P2	processed_pseudogene
G1	ENSG00000231681	AC020743.2	lincRNA
G1	ENSG00000231701	BMS1P13	unprocessed_pseudogene
G1	ENSG00000231714	AL513348.1	lincRNA
G1	ENSG00000231721	LINC-PINT	processed_transcript
G1	ENSG00000231806	PCAT7	antisense
G1	ENSG00000231940	RPS7P3	processed_pseudogene
G1	ENSG00000232034	AC092168.2	sense_intronic
G1	ENSG00000232044	LINC01105	processed_transcript
G1	ENSG00000232202	AC098824.1	processed_pseudogene
G1	ENSG00000232301	LNCPRESS1	lincRNA
G1	ENSG00000232303	DFFBP1	processed_pseudogene
G1	ENSG00000232445	AC006329.1	antisense
G1	ENSG00000232486	AL592437.2	processed_pseudogene
G1	ENSG00000232487	RASA3-IT1	sense_intronic
G1	ENSG00000232519	AL353807.2	antisense
G1	ENSG00000232611	AL683813.1	lincRNA
G1	ENSG00000232623	AP000266.1	antisense
G1	ENSG00000232638	AL390294.1	lincRNA
G1	ENSG00000232679	LINC01705	lincRNA
G1	ENSG00000232891	AL450344.3	sense_intronic
G1	ENSG00000232956	SNHG15	lincRNA
G1	ENSG00000233028	AC006970.2	processed_pseudogene
G1	ENSG00000233117	LINC00702	lincRNA
G1	ENSG00000233221	AC133785.1	antisense
G1	ENSG00000233230	AC079807.1	antisense
G1	ENSG00000233242	AL512604.2	antisense
G1	ENSG00000233325	MIPEPP3	transcribed_unprocessed_pseudogene
G1	ENSG00000233384	AC096537.1	bidirectional_promoter_lncRNA
G1	ENSG00000233397	AC008063.2	lincRNA
G1	ENSG00000233491	AC008163.1	transcribed_unitary_pseudogene
G1	ENSG00000233542	AL391845.2	antisense
G1	ENSG00000233614	DDX11L10	transcribed_unprocessed_pseudogene
G1	ENSG00000233671	AC083899.2	processed_pseudogene
G1	ENSG00000234219	CDCA4P4	unprocessed_pseudogene
G1	ENSG00000234231	AC093616.1	transcribed_unprocessed_pseudogene
G1	ENSG00000234290	AC116366.1	antisense
G1	ENSG00000234492	RPL34-AS1	lincRNA
G1	ENSG00000234685	NUS1P2	processed_pseudogene
G1	ENSG00000234737	KRT18P15	processed_pseudogene
G1	ENSG00000234832	AL096677.1	antisense
G1	ENSG00000234912	SNHG20	sense_overlapping
G1	ENSG00000234981	AC244034.1	processed_pseudogene
G1	ENSG00000234999	SNRPCP19	processed_pseudogene
G1	ENSG00000235026	DPP10-AS1	antisense
G1	ENSG00000235244	DANT2	lincRNA
G1	ENSG00000235529	AGAP1-IT1	sense_intronic
G1	ENSG00000235618	FAM21EP	transcribed_unprocessed_pseudogene
G1	ENSG00000235651	AC064850.1	processed_pseudogene
G1	ENSG00000236013	AL357146.1	lincRNA
G1	ENSG00000236120	AC110995.1	lincRNA
G1	ENSG00000236184	TCEA1P4	processed_pseudogene
G1	ENSG00000236255	AC009404.1	lincRNA
G1	ENSG00000236296	GUSBP5	transcribed_processed_pseudogene
G1	ENSG00000236519	LINC01424	antisense
G1	ENSG00000236581	STARD13-AS	processed_transcript
G1	ENSG00000236643	AL354928.1	antisense
G1	ENSG00000236956	NF1P8	unprocessed_pseudogene
G1	ENSG00000237013	LINC01812	lincRNA
G1	ENSG00000237149	ZNF503-AS2	antisense
G1	ENSG00000237268	AC092447.7	transcribed_unprocessed_pseudogene
G1	ENSG00000237436	CAMTA1-DT	antisense
G1	ENSG00000237499	AL357060.1	antisense
G1	ENSG00000237531	AL672277.1	lincRNA
G1	ENSG00000237605	AL591846.2	antisense
G1	ENSG00000237788	AL162615.1	processed_pseudogene
G1	ENSG00000237863	AL035425.1	antisense
G1	ENSG00000237870	AC073130.1	processed_transcript
G1	ENSG00000237892	KLF7-IT1	sense_intronic
G1	ENSG00000238062	SPATA3-AS1	lincRNA
G1	ENSG00000238129	AL121904.1	lincRNA
G1	ENSG00000238286	SLC35E1P1	processed_pseudogene
G1	ENSG00000239218	RPS20P22	transcribed_processed_pseudogene
G1	ENSG00000240211	AC092849.1	antisense
G1	ENSG00000240288	GHRLOS	antisense
G1	ENSG00000240441	AC007622.1	processed_pseudogene
G1	ENSG00000240476	LINC00973	lincRNA
G1	ENSG00000240498	CDKN2B-AS1	antisense
G1	ENSG00000240668	KRT8P36	processed_pseudogene
G1	ENSG00000240695	AC117382.1	processed_pseudogene
G1	ENSG00000240770	C21orf91-OT1	lincRNA
G1	ENSG00000240889	NDUFB2-AS1	antisense
G1	ENSG00000241112	RPL29P14	processed_pseudogene
G1	ENSG00000241157	AC104763.1	processed_pseudogene
G1	ENSG00000241269	AC093620.1	antisense
G1	ENSG00000241280	AC106712.1	lincRNA
G1	ENSG00000241313	WWTR1-AS1	antisense
G1	ENSG00000241361	SLC25A24P1	transcribed_unprocessed_pseudogene
G1	ENSG00000241547	ACTG1P20	processed_pseudogene
G1	ENSG00000241684	ADAMTS9-AS2	antisense
G1	ENSG00000241749	RPSAP52	transcribed_processed_pseudogene
G1	ENSG00000241764	AC002467.1	antisense
G1	ENSG00000242474	AC093627.5	lincRNA
G1	ENSG00000242599	CSAG4	transcribed_unprocessed_pseudogene
G1	ENSG00000242615	AC022415.1	transcribed_processed_pseudogene
G1	ENSG00000243008	AL359538.1	processed_transcript
G1	ENSG00000243819	RN7SL832P	lincRNA
G1	ENSG00000243960	AL390195.1	sense_overlapping
G1	ENSG00000244346	AC092953.1	processed_pseudogene
G1	ENSG00000244485	RPL18P13	processed_pseudogene
G1	ENSG00000245904	AC025164.1	antisense
G1	ENSG00000246130	AC107959.2	antisense
G1	ENSG00000246250	AC087521.2	antisense
G1	ENSG00000246350	AL049543.1	antisense
G1	ENSG00000246363	LINC02458	lincRNA
G1	ENSG00000246889	AP000487.1	antisense
G1	ENSG00000247092	SNHG10	antisense
G1	ENSG00000247516	MIR4458HG	lincRNA
G1	ENSG00000248124	RRN3P1	transcribed_unprocessed_pseudogene
G1	ENSG00000248370	LINC02434	lincRNA
G1	ENSG00000248461	LINC02119	lincRNA
G1	ENSG00000248476	BACH1-IT1	sense_intronic
G1	ENSG00000248503	AL356235.1	transcribed_processed_pseudogene
G1	ENSG00000248943	AC140125.1	lincRNA
G1	ENSG00000249026	CTNNA1P1	processed_pseudogene
G1	ENSG00000249345	LINC02405	lincRNA
G1	ENSG00000249378	LINC01060	lincRNA
G1	ENSG00000249637	AC008438.1	antisense
G1	ENSG00000249661	TNRC18P1	processed_pseudogene
G1	ENSG00000249850	KRT18P31	processed_pseudogene
G1	ENSG00000249926	AC117500.1	lincRNA
G1	ENSG00000250072	SH3TC2-DT	lincRNA
G1	ENSG00000250240	AC008840.1	antisense
G1	ENSG00000250365	AL139353.2	antisense
G1	ENSG00000250657	AC097451.1	processed_transcript
G1	ENSG00000250853	RNF138P1	processed_pseudogene
G1	ENSG00000250992	AC139491.3	antisense
G1	ENSG00000251023	AC114980.1	sense_intronic
G1	ENSG00000251127	AC091173.1	lincRNA
G1	ENSG00000251129	LINC02506	lincRNA
G1	ENSG00000251141	MRPS30-DT	antisense
G1	ENSG00000251194	AL133330.1	sense_intronic
G1	ENSG00000251226	AP001999.1	lincRNA
G1	ENSG00000251323	AP003086.1	lincRNA
G1	ENSG00000251348	HSPD1P11	processed_pseudogene
G1	ENSG00000251441	RTEL1P1	processed_pseudogene
G1	ENSG00000251442	LINC01094	lincRNA
G1	ENSG00000251536	AC055717.1	lincRNA
G1	ENSG00000251598	AC096711.3	lincRNA
G1	ENSG00000251682	AC122718.2	processed_pseudogene
G1	ENSG00000251867	AC009812.1	antisense
G1	ENSG00000253218	KLF3P1	processed_pseudogene
G1	ENSG00000253230	LINC00599	lincRNA
G1	ENSG00000253256	AC134043.1	antisense
G1	ENSG00000253307	AC011676.1	antisense
G1	ENSG00000253399	AC078852.1	sense_intronic
G1	ENSG00000253522	MIR3142HG	lincRNA
G1	ENSG00000253616	AC107959.3	antisense
G1	ENSG00000253633	AP002852.1	lincRNA
G1	ENSG00000253775	AC100802.1	lincRNA
G1	ENSG00000253993	AC104027.1	processed_pseudogene
G1	ENSG00000254094	AC078852.2	sense_intronic
G1	ENSG00000254207	AC100797.1	sense_intronic
G1	ENSG00000254229	FAM90A12P	unprocessed_pseudogene
G1	ENSG00000254400	AC091564.2	antisense
G1	ENSG00000254454	RCC2P6	processed_pseudogene
G1	ENSG00000254530	AC090124.1	lincRNA
G1	ENSG00000254547	AC036111.1	unprocessed_pseudogene
G1	ENSG00000254579	AC090720.1	processed_pseudogene
G1	ENSG00000254615	AC027031.2	lincRNA
G1	ENSG00000254905	AP001318.1	antisense
G1	ENSG00000254916	AP004607.4	unprocessed_pseudogene
G1	ENSG00000255248	MIR100HG	processed_transcript
G1	ENSG00000255409	RSF1-IT1	sense_intronic
G1	ENSG00000255496	AC103796.1	sense_overlapping
G1	ENSG00000255498	AC068385.1	antisense
G1	ENSG00000255571	MIR9-3HG	lincRNA
G1	ENSG00000255836	AC131206.1	processed_pseudogene
G1	ENSG00000255847	AP003717.1	antisense
G1	ENSG00000256128	LINC00944	lincRNA
G1	ENSG00000256341	AP006333.1	antisense
G1	ENSG00000256712	AC134349.1	sense_intronic
G1	ENSG00000256843	AC023157.2	processed_pseudogene
G1	ENSG00000256981	AC134349.2	unprocessed_pseudogene
G1	ENSG00000257052	AP003721.4	antisense
G1	ENSG00000257246	PHBP19	processed_pseudogene
G1	ENSG00000257285	AL132780.1	antisense
G1	ENSG00000257432	AL512310.3	processed_pseudogene
G1	ENSG00000257453	AC011611.3	antisense
G1	ENSG00000257511	AC084824.1	processed_pseudogene
G1	ENSG00000257548	AC078929.1	antisense
G1	ENSG00000257576	HSPD1P4	processed_pseudogene
G1	ENSG00000257599	OVCH1-AS1	antisense
G1	ENSG00000257635	CR383656.4	transcribed_processed_pseudogene
G1	ENSG00000257681	AC025265.1	antisense
G1	ENSG00000257913	DDN-AS1	antisense
G1	ENSG00000257954	AC125611.2	processed_pseudogene
G1	ENSG00000258038	LINC02327	lincRNA
G1	ENSG00000258099	ATXN2-AS	antisense
G1	ENSG00000258400	AL591767.1	antisense
G1	ENSG00000258441	LINC00641	processed_transcript
G1	ENSG00000258450	AL139099.2	sense_intronic
G1	ENSG00000258469	CHMP4BP1	processed_pseudogene
G1	ENSG00000258553	AL157911.1	antisense
G1	ENSG00000258599	AL355922.2	processed_pseudogene
G1	ENSG00000258655	ARHGAP5-AS1	antisense
G1	ENSG00000258725	PRC1-AS1	antisense
G1	ENSG00000258789	AL162171.1	antisense
G1	ENSG00000258813	AL442663.3	antisense
G1	ENSG00000258891	AC005480.1	antisense
G1	ENSG00000258957	AL359317.2	lincRNA
G1	ENSG00000258997	NF1P2	unprocessed_pseudogene
G1	ENSG00000259172	AC023024.1	antisense
G1	ENSG00000259200	AC068722.1	lincRNA
G1	ENSG00000259205	PRKXP1	processed_pseudogene
G1	ENSG00000259470	KRT8P9	processed_pseudogene
G1	ENSG00000259540	AC027020.1	antisense
G1	ENSG00000259581	TYRO3P	processed_pseudogene
G1	ENSG00000259623	AC125257.1	sense_overlapping
G1	ENSG00000259630	AC104046.1	transcribed_processed_pseudogene
G1	ENSG00000259687	LINC01220	lincRNA
G1	ENSG00000259706	HSP90B2P	processed_pseudogene
G1	ENSG00000259780	AC009065.1	lincRNA
G1	ENSG00000259820	AC083843.2	lincRNA
G1	ENSG00000259826	AC072061.1	antisense
G1	ENSG00000259848	AC097374.1	transcribed_unprocessed_pseudogene
G1	ENSG00000259877	AC009113.1	antisense
G1	ENSG00000259984	AL928711.1	unprocessed_pseudogene
G1	ENSG00000259993	AC135731.1	processed_pseudogene
G1	ENSG00000259994	AL353796.1	sense_overlapping
G1	ENSG00000260060	AC009088.1	antisense
G1	ENSG00000260064	AC092332.1	sense_intronic
G1	ENSG00000260101	AC008074.2	lincRNA
G1	ENSG00000260105	AOC4P	transcribed_unprocessed_pseudogene
G1	ENSG00000260186	LINC02137	lincRNA
G1	ENSG00000260190	AL807752.5	sense_overlapping
G1	ENSG00000260211	AC139426.1	processed_pseudogene
G1	ENSG00000260302	AP005482.1	lincRNA
G1	ENSG00000260339	HEXA-AS1	antisense
G1	ENSG00000260350	AC012173.1	antisense
G1	ENSG00000260493	AC011773.4	antisense
G1	ENSG00000260526	AC109347.1	antisense
G1	ENSG00000260686	AC008669.1	sense_overlapping
G1	ENSG00000260708	AL118516.1	antisense
G1	ENSG00000260727	SLC7A5P1	unprocessed_pseudogene
G1	ENSG00000260742	AC009962.1	antisense
G1	ENSG00000260806	AL163051.1	antisense
G1	ENSG00000260830	AL135744.1	antisense
G1	ENSG00000260862	AC099506.1	sense_intronic
G1	ENSG00000260920	AL031985.3	sense_overlapping
G1	ENSG00000260948	AL390195.2	sense_overlapping
G1	ENSG00000260966	AP001486.2	sense_overlapping
G1	ENSG00000260997	AC004847.1	sense_overlapping
G1	ENSG00000261029	AC138304.1	lincRNA
G1	ENSG00000261051	AC107021.2	sense_overlapping
G1	ENSG00000261079	AC009053.2	lincRNA
G1	ENSG00000261083	LINC02516	lincRNA
G1	ENSG00000261117	AC009486.1	lincRNA
G1	ENSG00000261220	AC103706.1	lincRNA
G1	ENSG00000261324	AC010168.2	sense_overlapping
G1	ENSG00000261407	AC013565.3	antisense
G1	ENSG00000261409	AL035425.3	sense_overlapping
G1	ENSG00000261428	AC097461.1	antisense
G1	ENSG00000261441	AC124068.2	antisense
G1	ENSG00000261468	AC096921.2	sense_overlapping
G1	ENSG00000261526	AC012615.1	lincRNA
G1	ENSG00000261596	AC005632.2	sense_intronic
G1	ENSG00000261659	Z92544.2	processed_transcript
G1	ENSG00000261845	AC124283.1	antisense
G1	ENSG00000261889	AC108134.2	lincRNA
G1	ENSG00000262119	AL079343.1	sense_intronic
G1	ENSG00000262454	MIR193BHG	lincRNA
G1	ENSG00000262652	AC124283.3	sense_intronic
G1	ENSG00000263069	AC124319.2	antisense
G1	ENSG00000263366	ABHD17AP5	processed_pseudogene
G1	ENSG00000263612	AF186192.3	lincRNA
G1	ENSG00000263823	AC009831.1	antisense
G1	ENSG00000263826	AC112907.3	antisense
G1	ENSG00000264235	AP005329.1	antisense
G1	ENSG00000265019	NCOR1P2	unprocessed_pseudogene
G1	ENSG00000265417	AP005119.2	processed_pseudogene
G1	ENSG00000266357	LINC02074	lincRNA
G1	ENSG00000266501	AC025198.1	processed_pseudogene
G1	ENSG00000266897	AC005546.1	lincRNA
G1	ENSG00000266910	AC008507.1	processed_pseudogene
G1	ENSG00000267009	AC007780.1	processed_transcript
G1	ENSG00000267160	AC091152.2	antisense
G1	ENSG00000267192	AC006116.4	antisense
G1	ENSG00000267254	ZNF790-AS1	antisense
G1	ENSG00000267316	AC090409.2	lincRNA
G1	ENSG00000267328	AC002398.2	antisense
G1	ENSG00000267405	AC005180.1	lincRNA
G1	ENSG00000267493	CIRBP-AS1	antisense
G1	ENSG00000267497	NFE2L3P1	processed_pseudogene
G1	ENSG00000267504	AC090236.2	sense_intronic
G1	ENSG00000267519	AC020916.1	antisense
G1	ENSG00000267598	AC011446.2	antisense
G1	ENSG00000267757	EML2-AS1	processed_transcript
G1	ENSG00000267904	AC024075.1	sense_intronic
G1	ENSG00000268001	CARD8-AS1	antisense
G1	ENSG00000268095	ZNF649-AS1	antisense
G1	ENSG00000268333	AL132655.1	lincRNA
G1	ENSG00000268536	AC005523.1	lincRNA
G1	ENSG00000268543	AC012313.4	TEC
G1	ENSG00000268635	AP003680.1	antisense
G1	ENSG00000268670	AC016586.1	sense_intronic
G1	ENSG00000268798	AC027307.3	lincRNA
G1	ENSG00000268945	AC010422.2	lincRNA
G1	ENSG00000269044	AC024075.2	sense_intronic
G1	ENSG00000269296	AC005614.1	antisense
G1	ENSG00000269486	ERVK9-11	lincRNA
G1	ENSG00000269559	AC093677.2	antisense
G1	ENSG00000269892	AC125494.2	lincRNA
G1	ENSG00000269902	AC234772.2	lincRNA
G1	ENSG00000269906	AL606834.1	sense_intronic
G1	ENSG00000269929	AL158152.1	lincRNA
G1	ENSG00000269939	PCF11-AS1	lincRNA
G1	ENSG00000270036	AC027243.2	lincRNA
G1	ENSG00000270069	MIR222HG	lincRNA
G1	ENSG00000270175	AC023509.4	antisense
G1	ENSG00000270190	AC068491.3	lincRNA
G1	ENSG00000270194	AC097359.2	antisense
G1	ENSG00000270426	AC099343.2	sense_intronic
G1	ENSG00000270638	AL023806.1	lincRNA
G1	ENSG00000270640	AC104695.3	sense_intronic
G1	ENSG00000270681	AC095055.1	antisense
G1	ENSG00000270878	AL136038.4	processed_pseudogene
G1	ENSG00000271127	AP000526.1	sense_intronic
G1	ENSG00000271147	ARMCX5-GPRASP2	processed_transcript
G1	ENSG00000271361	HTATSF1P2	processed_pseudogene
G1	ENSG00000271614	ATP2B1-AS1	lincRNA
G1	ENSG00000271659	AL161729.4	antisense
G1	ENSG00000271784	AL031055.1	lincRNA
G1	ENSG00000271797	AC008494.3	antisense
G1	ENSG00000271858	CYB561D2	antisense
G1	ENSG00000271870	AC024060.1	antisense
G1	ENSG00000272008	AL139274.2	antisense
G1	ENSG00000272056	AC013472.3	antisense
G1	ENSG00000272072	AC004492.1	antisense
G1	ENSG00000272081	AC008972.2	lincRNA
G1	ENSG00000272086	AC025181.2	lincRNA
G1	ENSG00000272123	AC008966.2	antisense
G1	ENSG00000272146	ARF4-AS1	antisense
G1	ENSG00000272157	AC107373.2	antisense
G1	ENSG00000272159	AC087623.3	antisense
G1	ENSG00000272183	AC005041.3	antisense
G1	ENSG00000272267	AC021242.3	antisense
G1	ENSG00000272335	AC093297.2	lincRNA
G1	ENSG00000272368	AC074032.1	antisense
G1	ENSG00000272384	AC016405.3	lincRNA
G1	ENSG00000272468	AL021807.1	lincRNA
G1	ENSG00000272518	AC036214.2	sense_intronic
G1	ENSG00000272525	AC099522.2	lincRNA
G1	ENSG00000272549	LINC02538	lincRNA
G1	ENSG00000272551	AC017048.3	lincRNA
G1	ENSG00000272610	MAGI1-IT1	sense_intronic
G1	ENSG00000272622	AC010735.2	lincRNA
G1	ENSG00000272630	AL731563.3	lincRNA
G1	ENSG00000272644	AC097468.3	lincRNA
G1	ENSG00000272677	AC124016.1	antisense
G1	ENSG00000272686	AC006333.2	antisense
G1	ENSG00000272716	AL121658.1	lincRNA
G1	ENSG00000272758	AC083798.2	antisense
G1	ENSG00000272812	AC004908.2	sense_intronic
G1	ENSG00000272842	AL391834.1	antisense
G1	ENSG00000272906	AL353708.3	lincRNA
G1	ENSG00000272910	AC090425.2	antisense
G1	ENSG00000272936	AC096586.1	antisense
G1	ENSG00000272994	AC012360.3	lincRNA
G1	ENSG00000273063	AC007250.1	antisense
G1	ENSG00000273066	AL355987.4	processed_transcript
G1	ENSG00000273084	AC092171.5	lincRNA
G1	ENSG00000273106	AC019129.2	antisense
G1	ENSG00000273204	AC104506.1	antisense
G1	ENSG00000273319	AC058791.1	lincRNA
G1	ENSG00000273320	AC007032.1	antisense
G1	ENSG00000273328	AC099329.2	processed_transcript
G1	ENSG00000273355	AP000894.4	lincRNA
G1	ENSG00000273356	LINC02019	lincRNA
G1	ENSG00000273381	AL158071.4	lincRNA
G1	ENSG00000273387	AC005005.3	antisense
G1	ENSG00000273394	AC128687.2	antisense
G1	ENSG00000273442	AC006946.3	lincRNA
G1	ENSG00000273448	AC006480.2	lincRNA
G1	ENSG00000273449	AC093788.1	lincRNA
G1	ENSG00000273485	AL139339.2	antisense
G1	ENSG00000273568	AC131009.3	sense_intronic
G1	ENSG00000273669	AC015819.1	lincRNA
G1	ENSG00000273680	AC009318.2	antisense
G1	ENSG00000273711	AC005520.5	antisense
G1	ENSG00000273729	AC007686.3	antisense
G1	ENSG00000273797	AL133445.2	sense_intronic
G1	ENSG00000273888	FRMD6-AS1	antisense
G1	ENSG00000273893	AL133520.1	sense_intronic
G1	ENSG00000273989	AC022079.1	sense_intronic
G1	ENSG00000274015	AL136038.5	lincRNA
G1	ENSG00000274021	AC024909.2	antisense
G1	ENSG00000274104	AC020910.4	lincRNA
G1	ENSG00000274105	AC084824.3	sense_intronic
G1	ENSG00000274184	AC011815.2	lincRNA
G1	ENSG00000274292	AC084018.2	lincRNA
G1	ENSG00000274340	AC032011.1	lincRNA
G1	ENSG00000274425	AC114271.1	antisense
G1	ENSG00000274598	AC087893.1	sense_intronic
G1	ENSG00000274649	AL512624.1	processed_pseudogene
G1	ENSG00000274712	AC005332.4	lincRNA
G1	ENSG00000274828	AC068473.5	lincRNA
G1	ENSG00000274911	AL627230.2	unprocessed_pseudogene
G1	ENSG00000274943	AC079684.1	sense_intronic
G1	ENSG00000275029	HMGB1P24	transcribed_processed_pseudogene
G1	ENSG00000275055	AC011468.5	antisense
G1	ENSG00000275092	AL031710.2	sense_intronic
G1	ENSG00000275120	AC048382.5	antisense
G1	ENSG00000275322	AC103746.1	lincRNA
G1	ENSG00000275454	AC105020.6	antisense
G1	ENSG00000275854	AC084824.4	sense_intronic
G1	ENSG00000275894	AL021578.1	sense_intronic
G1	ENSG00000276058	STMN1P1	processed_pseudogene
G1	ENSG00000276259	AC009118.3	antisense
G1	ENSG00000276524	AC010999.2	lincRNA
G1	ENSG00000276564	AC130650.2	lincRNA
G1	ENSG00000276573	AL442067.1	sense_intronic
G1	ENSG00000276603	AL109614.1	sense_intronic
G1	ENSG00000276728	AC142472.1	lincRNA
G1	ENSG00000276744	AC105137.2	sense_intronic
G1	ENSG00000276786	BX640515.1	lincRNA
G1	ENSG00000276853	AC026124.2	sense_intronic
G1	ENSG00000276900	AC023157.3	antisense
G1	ENSG00000277170	AC012676.3	sense_intronic
G1	ENSG00000277173	AC004241.4	sense_intronic
G1	ENSG00000277342	AC048344.4	sense_intronic
G1	ENSG00000277352	AP001065.2	lincRNA
G1	ENSG00000277367	AL929601.4	processed_pseudogene
G1	ENSG00000277423	AC069234.5	lincRNA
G1	ENSG00000277589	AC244093.4	sense_intronic
G1	ENSG00000277693	AP003900.1	lincRNA
G1	ENSG00000277738	AC126175.1	lincRNA
G1	ENSG00000277945	AC107308.1	sense_intronic
G1	ENSG00000278022	AC118658.1	sense_intronic
G1	ENSG00000278058	AC009159.3	lincRNA
G1	ENSG00000278156	TSC22D1-AS1	antisense
G1	ENSG00000278576	AL162171.3	sense_intronic
G1	ENSG00000278743	AC087239.1	lincRNA
G1	ENSG00000279048	AC080080.1	TEC
G1	ENSG00000279075	AC091965.5	TEC
G1	ENSG00000279089	AC005839.1	TEC
G1	ENSG00000279092	AC025678.3	TEC
G1	ENSG00000279098	AC097460.3	TEC
G1	ENSG00000279122	AC020763.2	TEC
G1	ENSG00000279133	AC018628.1	TEC
G1	ENSG00000279138	AP002847.1	TEC
G1	ENSG00000279145	AC011912.1	lincRNA
G1	ENSG00000279164	AL118508.3	TEC
G1	ENSG00000279253	AL121753.2	TEC
G1	ENSG00000279349	AC092692.1	TEC
G1	ENSG00000279432	AC015799.1	TEC
G1	ENSG00000279476	AC092139.3	TEC
G1	ENSG00000279481	AC104791.2	TEC
G1	ENSG00000279528	AC115618.3	TEC
G1	ENSG00000279568	AC093525.9	TEC
G1	ENSG00000279583	AC009086.3	TEC
G1	ENSG00000279584	AC005593.1	TEC
G1	ENSG00000279608	AL353795.3	TEC
G1	ENSG00000279613	AC124283.5	TEC
G1	ENSG00000279637	AC018445.3	TEC
G1	ENSG00000279649	AC020978.9	TEC
G1	ENSG00000279667	AL603839.4	TEC
G1	ENSG00000279685	MAPT-IT1	sense_intronic
G1	ENSG00000279691	AC113410.3	TEC
G1	ENSG00000279696	AP001273.1	TEC
G1	ENSG00000279738	AL022311.1	sense_overlapping
G1	ENSG00000279861	AC073548.1	TEC
G1	ENSG00000279865	AC006511.3	TEC
G1	ENSG00000279962	AP001525.1	TEC
G1	ENSG00000280010	AP001350.2	TEC
G1	ENSG00000280046	AC104581.4	TEC
G1	ENSG00000280219	AC093908.1	TEC
G1	ENSG00000280231	AL031719.2	TEC
G1	ENSG00000280287	AC131212.3	TEC
G1	ENSG00000280453	AP006248.5	TEC
G1	ENSG00000281026	N4BP2L2-IT2	sense_intronic
G1	ENSG00000281347	NF1P9	transcribed_unprocessed_pseudogene
G1	ENSG00000281756	C2-AS1	antisense
G1	ENSG00000281912	LINC01144	lincRNA
G1	ENSG00000282100	HSP90AB4P	processed_pseudogene
G1	ENSG00000282164	PEG13	sense_intronic
G1	ENSG00000283122	HYMAI	sense_overlapping
G1	ENSG00000283566	AC243725.1	unprocessed_pseudogene
G1	ENSG00000283696	AL592295.4	lincRNA
G1	ENSG00000284196	AL158064.1	processed_transcript
G1	ENSG00000284697	AC006511.5	processed_transcript
G1	ENSG00000284834	AC183088.2	unprocessed_pseudogene
G1	ENSG00000284930	AC005280.2	lincRNA
G1	ENSG00000284977	AL160272.1	lincRNA
G1	ENSG00000285278	TFAP2A-AS2	antisense
G1	ENSG00000285410	GABPB1-IT1	sense_intronic
G1	ENSG00000285525	AC099670.3	lincRNA
G1	ENSG00000285531	Z83840.1	processed_pseudogene
G1	ENSG00000285722	AC207130.1	lincRNA
G1	ENSG00000285793	AC125232.2	processed_transcript
G1S	ENSG00000080947	CROCCP3	transcribed_unprocessed_pseudogene
G1S	ENSG00000099251	HSD17B7P2	transcribed_unprocessed_pseudogene
G1S	ENSG00000100181	TPTEP1	transcribed_unprocessed_pseudogene
G1S	ENSG00000116652	DLEU2L	sense_intronic
G1S	ENSG00000123201	GUCY1B2	transcribed_unitary_pseudogene
G1S	ENSG00000125631	HTR5BP	transcribed_unprocessed_pseudogene
G1S	ENSG00000131797	CLUHP3	transcribed_unprocessed_pseudogene
G1S	ENSG00000133624	ZNF767P	transcribed_unprocessed_pseudogene
G1S	ENSG00000134297	PLEKHA8P1	transcribed_processed_pseudogene
G1S	ENSG00000162997	PRORSD1P	transcribed_unitary_pseudogene
G1S	ENSG00000166473	PKD1L2	polymorphic_pseudogene
G1S	ENSG00000169668	BCRP2	transcribed_unprocessed_pseudogene
G1S	ENSG00000170827	CELP	transcribed_unprocessed_pseudogene
G1S	ENSG00000173209	AHSA2P	transcribed_unitary_pseudogene
G1S	ENSG00000173727	AP000769.1	transcribed_unprocessed_pseudogene
G1S	ENSG00000175170	FAM182B	lincRNA
G1S	ENSG00000176700	SCAND2P	transcribed_unprocessed_pseudogene
G1S	ENSG00000176826	FKBP9P1	transcribed_unprocessed_pseudogene
G1S	ENSG00000176912	TYMSOS	bidirectional_promoter_lncRNA
G1S	ENSG00000176998	HCG4	unprocessed_pseudogene
G1S	ENSG00000178803	ADORA2A-AS1	antisense
G1S	ENSG00000179571	NBPF17P	unprocessed_pseudogene
G1S	ENSG00000181126	HLA-V	transcribed_unprocessed_pseudogene
G1S	ENSG00000182165	TP53TG1	lincRNA
G1S	ENSG00000183929	DUSP5P1	processed_pseudogene
G1S	ENSG00000185495	AC138393.1	transcribed_unprocessed_pseudogene
G1S	ENSG00000186369	LINC00643	transcribed_unitary_pseudogene
G1S	ENSG00000188662	HILS1	transcribed_unitary_pseudogene
G1S	ENSG00000189014	SHLD2P3	unprocessed_pseudogene
G1S	ENSG00000189166	TNRC18P3	unprocessed_pseudogene
G1S	ENSG00000189229	AC069277.1	lincRNA
G1S	ENSG00000189348	FAM90A27P	transcribed_unprocessed_pseudogene
G1S	ENSG00000189419	SPATA41	lincRNA
G1S	ENSG00000196566	AL138767.1	antisense
G1S	ENSG00000196668	LINC00173	processed_transcript
G1S	ENSG00000197536	C5orf56	processed_transcript
G1S	ENSG00000197550	AL359955.1	unprocessed_pseudogene
G1S	ENSG00000198155	ZNF876P	transcribed_unprocessed_pseudogene
G1S	ENSG00000198468	FLVCR1-DT	lincRNA
G1S	ENSG00000198496	NBR2	bidirectional_promoter_lncRNA
G1S	ENSG00000198555	AC133561.1	unprocessed_pseudogene
G1S	ENSG00000203635	AC144450.1	lincRNA
G1S	ENSG00000203739	AL645568.1	antisense
G1S	ENSG00000203865	ATP1A1-AS1	processed_transcript
G1S	ENSG00000204118	NAP1L6	transcribed_processed_pseudogene
G1S	ENSG00000204261	PSMB8-AS1	lincRNA
G1S	ENSG00000204650	LINC02210	transcribed_unitary_pseudogene
G1S	ENSG00000204666	AC010624.1	sense_overlapping
G1S	ENSG00000204904	LINC01545	lincRNA
G1S	ENSG00000205325	AC005863.1	lincRNA
G1S	ENSG00000205334	LINC01460	lincRNA
G1S	ENSG00000205634	LINC00898	lincRNA
G1S	ENSG00000205682	AC020741.1	lincRNA
G1S	ENSG00000206567	AC022007.1	lincRNA
G1S	ENSG00000212694	LINC01089	lincRNA
G1S	ENSG00000213365	AP000593.1	processed_pseudogene
G1S	ENSG00000213385	AC105052.2	processed_pseudogene
G1S	ENSG00000213412	HNRNPA1P33	processed_pseudogene
G1S	ENSG00000213542	AC007000.1	processed_pseudogene
G1S	ENSG00000213801	ZNF321P	transcribed_processed_pseudogene
G1S	ENSG00000214076	CPSF1P1	processed_pseudogene
G1S	ENSG00000214106	PAXIP1-AS2	antisense
G1S	ENSG00000214335	CTAGE16P	processed_pseudogene
G1S	ENSG00000214425	LRRC37A4P	transcribed_unprocessed_pseudogene
G1S	ENSG00000214617	SLC6A10P	transcribed_unprocessed_pseudogene
G1S	ENSG00000214776	AC092821.1	transcribed_unprocessed_pseudogene
G1S	ENSG00000214796	AC098934.1	transcribed_unprocessed_pseudogene
G1S	ENSG00000214894	LINC00243	lincRNA
G1S	ENSG00000214922	HLA-F-AS1	processed_transcript
G1S	ENSG00000215237	AL592293.1	unprocessed_pseudogene
G1S	ENSG00000215838	AL451074.1	transcribed_processed_pseudogene
G1S	ENSG00000219747	AL133260.1	processed_pseudogene
G1S	ENSG00000222020	AC062017.1	antisense
G1S	ENSG00000223343	AC137630.1	antisense
G1S	ENSG00000223382	LINC01778	lincRNA
G1S	ENSG00000223396	RPS10P7	transcribed_processed_pseudogene
G1S	ENSG00000223495	AC239859.2	processed_pseudogene
G1S	ENSG00000223566	TNRC18P2	unprocessed_pseudogene
G1S	ENSG00000223703	AC027612.1	unprocessed_pseudogene
G1S	ENSG00000223745	CCDC18-AS1	processed_transcript
G1S	ENSG00000223855	HRAT92	lincRNA
G1S	ENSG00000224003	YES1P1	processed_pseudogene
G1S	ENSG00000224020	MIR181A2HG	antisense
G1S	ENSG00000224027	AL133456.1	lincRNA
G1S	ENSG00000224046	AC005076.1	antisense
G1S	ENSG00000224050	AL008723.1	lincRNA
G1S	ENSG00000224106	CYP4F25P	unprocessed_pseudogene
G1S	ENSG00000224152	AC009506.1	antisense
G1S	ENSG00000224165	DNAJC27-AS1	antisense
G1S	ENSG00000224216	AC234781.1	antisense
G1S	ENSG00000224505	AC138150.1	antisense
G1S	ENSG00000224533	TMLHE-AS1	antisense
G1S	ENSG00000224536	AC096677.1	antisense
G1S	ENSG00000224794	AL022326.1	lincRNA
G1S	ENSG00000224897	POT1-AS1	antisense
G1S	ENSG00000224905	AP001347.1	antisense
G1S	ENSG00000225032	AL162586.1	antisense
G1S	ENSG00000225096	AL445250.1	lincRNA
G1S	ENSG00000225138	SLC9A3-AS1	processed_transcript
G1S	ENSG00000225177	FLJ46906	antisense
G1S	ENSG00000225399	AC121247.1	lincRNA
G1S	ENSG00000225411	CR786580.1	lincRNA
G1S	ENSG00000225492	GBP1P1	transcribed_unprocessed_pseudogene
G1S	ENSG00000225511	LINC00475	transcribed_unprocessed_pseudogene
G1S	ENSG00000225595	LINC01623	lincRNA
G1S	ENSG00000225675	LINC01771	lincRNA
G1S	ENSG00000225855	RUSC1-AS1	antisense
G1S	ENSG00000225868	AC016582.1	transcribed_unprocessed_pseudogene
G1S	ENSG00000226031	FGF13-AS1	antisense
G1S	ENSG00000226053	LINC01776	lincRNA
G1S	ENSG00000226087	AC073283.2	lincRNA
G1S	ENSG00000226091	LINC00937	lincRNA
G1S	ENSG00000226332	AL354836.1	antisense
G1S	ENSG00000226374	LINC01345	lincRNA
G1S	ENSG00000226383	LINC01876	lincRNA
G1S	ENSG00000226386	PARD3-AS1	antisense
G1S	ENSG00000226445	BX322234.1	antisense
G1S	ENSG00000226468	AC018641.1	processed_pseudogene
G1S	ENSG00000226508	LINC01918	lincRNA
G1S	ENSG00000226580	RPL39P40	processed_pseudogene
G1S	ENSG00000226620	LINC00343	processed_transcript
G1S	ENSG00000226686	LINC01535	lincRNA
G1S	ENSG00000226696	LENG8-AS1	antisense
G1S	ENSG00000226913	BSN-DT	lincRNA
G1S	ENSG00000226964	RHEBP2	processed_pseudogene
G1S	ENSG00000227141	AL160286.1	processed_pseudogene
G1S	ENSG00000227479	AC124861.1	lincRNA
G1S	ENSG00000227495	AC004771.1	antisense
G1S	ENSG00000227502	LINC01268	lincRNA
G1S	ENSG00000227811	INKA2-AS1	bidirectional_promoter_lncRNA
G1S	ENSG00000227825	SLC9A7P1	transcribed_processed_pseudogene
G1S	ENSG00000227964	LINC01429	lincRNA
G1S	ENSG00000228126	FALEC	lincRNA
G1S	ENSG00000228142	AL354861.2	lincRNA
G1S	ENSG00000228203	RNF144A-AS1	processed_transcript
G1S	ENSG00000228274	AL021707.2	antisense
G1S	ENSG00000228561	AC026355.1	lincRNA
G1S	ENSG00000228630	HOTAIR	antisense
G1S	ENSG00000228656	MYO5BP3	processed_pseudogene
G1S	ENSG00000229064	AC104073.1	processed_pseudogene
G1S	ENSG00000229153	EPHA1-AS1	antisense
G1S	ENSG00000229178	AC233280.1	lincRNA
G1S	ENSG00000229221	HNRNPA1P66	processed_pseudogene
G1S	ENSG00000229261	AL596223.1	antisense
G1S	ENSG00000229356	LRRC3-DT	antisense
G1S	ENSG00000229401	MIR5689HG	lincRNA
G1S	ENSG00000229404	LINC00858	lincRNA
G1S	ENSG00000229422	AL512625.2	lincRNA
G1S	ENSG00000229539	AL353194.1	antisense
G1S	ENSG00000229558	SACS-AS1	lincRNA
G1S	ENSG00000229589	ACVR2B-AS1	antisense
G1S	ENSG00000229657	AL391822.1	processed_pseudogene
G1S	ENSG00000229661	BUD31P2	processed_pseudogene
G1S	ENSG00000229743	LINC01159	processed_transcript
G1S	ENSG00000229847	EMX2OS	antisense
G1S	ENSG00000229867	STEAP3-AS1	antisense
G1S	ENSG00000229970	AC007128.1	antisense
G1S	ENSG00000230027	AC092813.2	lincRNA
G1S	ENSG00000230074	AL162231.2	antisense
G1S	ENSG00000230177	AL080317.1	antisense
G1S	ENSG00000230194	AC000081.1	processed_pseudogene
G1S	ENSG00000230312	AC234782.1	processed_pseudogene
G1S	ENSG00000230316	FEZF1-AS1	antisense
G1S	ENSG00000230471	AP000532.2	lincRNA
G1S	ENSG00000230521	AL645929.1	unprocessed_pseudogene
G1S	ENSG00000230658	KLHL7-DT	lincRNA
G1S	ENSG00000230787	PSAT1P3	processed_pseudogene
G1S	ENSG00000230790	AC012456.2	antisense
G1S	ENSG00000230825	AC005532.1	processed_transcript
G1S	ENSG00000230870	FBXW11P1	processed_pseudogene
G1S	ENSG00000231079	AC105402.3	antisense
G1S	ENSG00000231083	AC011747.1	lincRNA
G1S	ENSG00000231187	AL356056.2	antisense
G1S	ENSG00000231249	ITPR1-DT	antisense
G1S	ENSG00000231367	AC011247.1	lincRNA
G1S	ENSG00000231419	LINC00689	processed_transcript
G1S	ENSG00000231437	LINC01750	lincRNA
G1S	ENSG00000231563	AL670729.1	antisense
G1S	ENSG00000231574	LINC02015	lincRNA
G1S	ENSG00000231584	FAHD2CP	transcribed_unprocessed_pseudogene
G1S	ENSG00000231638	LUARIS	antisense
G1S	ENSG00000231646	FSIP2-AS1	antisense
G1S	ENSG00000231652	AL590428.1	antisense
G1S	ENSG00000231728	TMSB15B-AS1	antisense
G1S	ENSG00000231793	DOC2GP	transcribed_unitary_pseudogene
G1S	ENSG00000232006	AC005537.1	lincRNA
G1S	ENSG00000232065	LINC01063	antisense
G1S	ENSG00000232093	DCST1-AS1	antisense
G1S	ENSG00000232155	AC244090.1	processed_pseudogene
G1S	ENSG00000232448	AL354824.2	lincRNA
G1S	ENSG00000232450	AL133517.1	transcribed_processed_pseudogene
G1S	ENSG00000232471	AC119751.1	unprocessed_pseudogene
G1S	ENSG00000232480	TGFB2-AS1	antisense
G1S	ENSG00000232645	LINC01431	lincRNA
G1S	ENSG00000232716	AC016831.2	processed_pseudogene
G1S	ENSG00000232807	AL137186.2	antisense
G1S	ENSG00000232815	DUX4L50	unprocessed_pseudogene
G1S	ENSG00000232874	AC080129.2	antisense
G1S	ENSG00000232936	AL157400.2	antisense
G1S	ENSG00000232940	HCG25	antisense
G1S	ENSG00000233006	MIR3936HG	processed_transcript
G1S	ENSG00000233215	LINC01687	lincRNA
G1S	ENSG00000233264	AC006042.3	processed_pseudogene
G1S	ENSG00000233275	AC009238.2	processed_pseudogene
G1S	ENSG00000233359	AC114485.1	lincRNA
G1S	ENSG00000233396	LINC01719	lincRNA
G1S	ENSG00000233429	HOTAIRM1	antisense
G1S	ENSG00000233435	AGGF1P2	processed_pseudogene
G1S	ENSG00000233455	AL035414.1	processed_pseudogene
G1S	ENSG00000233527	ZNF529-AS1	antisense
G1S	ENSG00000233571	AL592043.1	lincRNA
G1S	ENSG00000233654	AC108047.1	antisense
G1S	ENSG00000233912	AC026202.2	antisense
G1S	ENSG00000233937	CTC-338M12.4	processed_transcript
G1S	ENSG00000234062	AL390879.1	transcribed_unprocessed_pseudogene
G1S	ENSG00000234183	LINC01952	antisense
G1S	ENSG00000234235	BOK-AS1	antisense
G1S	ENSG00000234327	AC012146.1	processed_transcript
G1S	ENSG00000234460	AL772337.3	transcribed_unprocessed_pseudogene
G1S	ENSG00000234509	AP000253.1	lincRNA
G1S	ENSG00000234537	AL354751.1	unprocessed_pseudogene
G1S	ENSG00000234546	LNCTAM34A	lincRNA
G1S	ENSG00000234617	SNRK-AS1	antisense
G1S	ENSG00000234690	AC106869.1	lincRNA
G1S	ENSG00000234692	AL355601.1	lincRNA
G1S	ENSG00000234709	UPF3AP3	transcribed_processed_pseudogene
G1S	ENSG00000234754	C1orf140	lincRNA
G1S	ENSG00000234773	AC012618.3	transcribed_unprocessed_pseudogene
G1S	ENSG00000234883	MIR155HG	lincRNA
G1S	ENSG00000234928	LINC01659	lincRNA
G1S	ENSG00000234936	AC010883.1	antisense
G1S	ENSG00000235257	ITGA9-AS1	processed_transcript
G1S	ENSG00000235269	LINC02331	lincRNA
G1S	ENSG00000235280	MCF2L-AS1	antisense
G1S	ENSG00000235295	LINC01634	lincRNA
G1S	ENSG00000235368	SAPCD2P2	processed_pseudogene
G1S	ENSG00000235370	DNM1P51	transcribed_unprocessed_pseudogene
G1S	ENSG00000235410	AL157896.1	antisense
G1S	ENSG00000235545	AC103923.1	antisense
G1S	ENSG00000235688	AC116614.1	antisense
G1S	ENSG00000235821	IFITM4P	processed_pseudogene
G1S	ENSG00000235823	OLMALINC	lincRNA
G1S	ENSG00000235897	TM4SF19-AS1	antisense
G1S	ENSG00000236008	LINC01814	lincRNA
G1S	ENSG00000236028	AL354766.2	lincRNA
G1S	ENSG00000236213	AC006369.1	antisense
G1S	ENSG00000236358	AL355472.3	antisense
G1S	ENSG00000236404	VLDLR-AS1	antisense
G1S	ENSG00000236562	AC116049.1	processed_pseudogene
G1S	ENSG00000236670	KRT18P5	processed_pseudogene
G1S	ENSG00000236750	AC009237.9	processed_pseudogene
G1S	ENSG00000236819	LINC01563	lincRNA
G1S	ENSG00000236830	CBR3-AS1	processed_transcript
G1S	ENSG00000236947	AL139412.1	lincRNA
G1S	ENSG00000236969	GGT8P	unprocessed_pseudogene
G1S	ENSG00000236993	GAPDHP21	processed_pseudogene
G1S	ENSG00000237119	LINC01056	lincRNA
G1S	ENSG00000237161	AC068446.1	processed_pseudogene
G1S	ENSG00000237298	TTN-AS1	antisense
G1S	ENSG00000237310	GS1-124K5.4	lincRNA
G1S	ENSG00000237356	AL365295.1	processed_transcript
G1S	ENSG00000237357	BX088651.4	lincRNA
G1S	ENSG00000237523	LINC00857	lincRNA
G1S	ENSG00000237595	AL161937.2	lincRNA
G1S	ENSG00000237689	AC007064.2	lincRNA
G1S	ENSG00000237706	TRIM51EP	unprocessed_pseudogene
G1S	ENSG00000237751	LINC01143	lincRNA
G1S	ENSG00000237849	NFYAP1	processed_pseudogene
G1S	ENSG00000237886	NALT1	antisense
G1S	ENSG00000237940	LINC01238	lincRNA
G1S	ENSG00000237961	AC118282.1	processed_pseudogene
G1S	ENSG00000238107	AC245100.6	lincRNA
G1S	ENSG00000238113	LINC01410	lincRNA
G1S	ENSG00000238245	MYO5BP2	processed_pseudogene
G1S	ENSG00000238287	AL603839.3	antisense
G1S	ENSG00000239213	NCK1-DT	antisense
G1S	ENSG00000239335	LLPH-DT	antisense
G1S	ENSG00000239467	AC007405.3	lincRNA
G1S	ENSG00000239556	AC004951.2	transcribed_unprocessed_pseudogene
G1S	ENSG00000239791	AC002310.2	antisense
G1S	ENSG00000240086	AC092969.1	antisense
G1S	ENSG00000240687	AC082651.1	lincRNA
G1S	ENSG00000240922	LSAMP-AS1	antisense
G1S	ENSG00000240996	AL157400.4	lincRNA
G1S	ENSG00000241163	LINC00877	lincRNA
G1S	ENSG00000241889	AC079944.2	processed_pseudogene
G1S	ENSG00000243224	AC006252.1	antisense
G1S	ENSG00000243701	DUBR	lincRNA
G1S	ENSG00000243766	HOTTIP	antisense
G1S	ENSG00000243926	TIPARP-AS1	bidirectional_promoter_lncRNA
G1S	ENSG00000243967	NBPF5P	transcribed_unprocessed_pseudogene
G1S	ENSG00000243981	AC064862.6	transcribed_processed_pseudogene
G1S	ENSG00000244301	AOX3P	transcribed_unprocessed_pseudogene
G1S	ENSG00000244345	AC104435.2	lincRNA
G1S	ENSG00000244480	AC005154.2	transcribed_processed_pseudogene
G1S	ENSG00000244558	KCNK15-AS1	antisense
G1S	ENSG00000244627	TPTEP2	transcribed_unprocessed_pseudogene
G1S	ENSG00000245149	RNF139-AS1	lincRNA
G1S	ENSG00000245164	LINC00861	lincRNA
G1S	ENSG00000245213	AC105285.1	antisense
G1S	ENSG00000245275	SAP30L-AS1	antisense
G1S	ENSG00000245534	RORA-AS1	antisense
G1S	ENSG00000245556	SCAMP1-AS1	lincRNA
G1S	ENSG00000245571	FAM111A-DT	lincRNA
G1S	ENSG00000245614	DDX11-AS1	antisense
G1S	ENSG00000245662	LINC02211	lincRNA
G1S	ENSG00000246100	LINC00900	lincRNA
G1S	ENSG00000246174	KCTD21-AS1	antisense
G1S	ENSG00000246263	UBR5-AS1	antisense
G1S	ENSG00000246273	SBF2-AS1	antisense
G1S	ENSG00000246375	AC107067.1	lincRNA
G1S	ENSG00000246465	AC138904.1	lincRNA
G1S	ENSG00000246523	AP001528.1	lincRNA
G1S	ENSG00000246731	MGC16275	antisense
G1S	ENSG00000246863	AC012377.1	lincRNA
G1S	ENSG00000246877	DNM1P35	antisense
G1S	ENSG00000247121	AC009126.1	antisense
G1S	ENSG00000247151	CSTF3-DT	processed_transcript
G1S	ENSG00000247271	ZBED5-AS1	antisense
G1S	ENSG00000247317	LY6E-DT	lincRNA
G1S	ENSG00000247373	AC055713.1	lincRNA
G1S	ENSG00000247765	AC068446.2	lincRNA
G1S	ENSG00000248015	AC005329.1	antisense
G1S	ENSG00000248019	FAM13A-AS1	antisense
G1S	ENSG00000248206	AC074194.1	sense_intronic
G1S	ENSG00000248215	LINC02505	lincRNA
G1S	ENSG00000248334	WHAMMP2	transcribed_unprocessed_pseudogene
G1S	ENSG00000248362	AC011352.1	antisense
G1S	ENSG00000248367	AC008610.1	antisense
G1S	ENSG00000248429	FAM198B-AS1	antisense
G1S	ENSG00000248494	LNX1-AS2	sense_intronic
G1S	ENSG00000248498	ASNSP1	transcribed_unprocessed_pseudogene
G1S	ENSG00000248821	AC009238.3	unprocessed_pseudogene
G1S	ENSG00000248846	LINC02065	lincRNA
G1S	ENSG00000248858	FLJ46284	processed_transcript
G1S	ENSG00000248932	AC097103.2	antisense
G1S	ENSG00000249006	AL136360.1	processed_pseudogene
G1S	ENSG00000249052	AC093810.1	lincRNA
G1S	ENSG00000249079	AC118282.2	processed_pseudogene
G1S	ENSG00000249087	ZNF436-AS1	antisense
G1S	ENSG00000249092	PPIAP77	processed_pseudogene
G1S	ENSG00000249199	AC026785.3	lincRNA
G1S	ENSG00000249267	LINC00939	lincRNA
G1S	ENSG00000249337	SNX18P25	processed_pseudogene
G1S	ENSG00000249359	AC093274.1	lincRNA
G1S	ENSG00000249413	AC116049.2	lincRNA
G1S	ENSG00000249476	AC008467.1	lincRNA
G1S	ENSG00000249502	AC006160.1	antisense
G1S	ENSG00000249650	AC106772.1	antisense
G1S	ENSG00000249738	AC008691.1	antisense
G1S	ENSG00000249740	OSMR-AS1	lincRNA
G1S	ENSG00000249828	AC118282.3	processed_pseudogene
G1S	ENSG00000249898	MCPH1-AS1	antisense
G1S	ENSG00000249937	LINC02223	lincRNA
G1S	ENSG00000250012	AC079848.1	antisense
G1S	ENSG00000250016	SNX18P23	processed_pseudogene
G1S	ENSG00000250049	AC114316.2	lincRNA
G1S	ENSG00000250075	AC104806.2	lincRNA
G1S	ENSG00000250159	AC106791.1	antisense
G1S	ENSG00000250284	AC109439.2	lincRNA
G1S	ENSG00000250286	AC021491.2	processed_transcript
G1S	ENSG00000250303	AP002884.1	lincRNA
G1S	ENSG00000250318	AC003072.1	unprocessed_pseudogene
G1S	ENSG00000250320	AC113383.1	antisense
G1S	ENSG00000250371	AC007370.2	lincRNA
G1S	ENSG00000250519	AP002784.1	lincRNA
G1S	ENSG00000250546	AC079160.1	processed_transcript
G1S	ENSG00000250569	NTAN1P2	processed_pseudogene
G1S	ENSG00000250753	AC119751.4	processed_pseudogene
G1S	ENSG00000250786	SNHG18	lincRNA
G1S	ENSG00000250903	GMDS-DT	lincRNA
G1S	ENSG00000250950	AC093752.2	lincRNA
G1S	ENSG00000251095	AC097478.1	antisense
G1S	ENSG00000251136	AF117829.1	lincRNA
G1S	ENSG00000251179	TMEM92-AS1	antisense
G1S	ENSG00000251364	AC107884.1	antisense
G1S	ENSG00000251455	AC092611.1	antisense
G1S	ENSG00000251539	SNX18P24	processed_pseudogene
G1S	ENSG00000251611	FAM160A1-DT	lincRNA
G1S	ENSG00000251637	AP003716.1	lincRNA
G1S	ENSG00000253210	AC040970.1	antisense
G1S	ENSG00000253227	AC090192.2	lincRNA
G1S	ENSG00000253417	LINC02159	lincRNA
G1S	ENSG00000253508	AC004080.2	lincRNA
G1S	ENSG00000253535	AC120193.1	antisense
G1S	ENSG00000253554	AC022639.1	lincRNA
G1S	ENSG00000253582	AC090579.1	antisense
G1S	ENSG00000253671	AC027117.1	processed_transcript
G1S	ENSG00000253771	TPTE2P1	transcribed_unprocessed_pseudogene
G1S	ENSG00000253819	LINC01151	lincRNA
G1S	ENSG00000253841	AC024681.1	processed_pseudogene
G1S	ENSG00000253858	AC008619.1	antisense
G1S	ENSG00000253878	AC087752.3	sense_intronic
G1S	ENSG00000254477	AP000640.1	processed_transcript
G1S	ENSG00000254560	BBOX1-AS1	antisense
G1S	ENSG00000254718	AL157756.1	antisense
G1S	ENSG00000254750	CASP1P2	unprocessed_pseudogene
G1S	ENSG00000254777	AC022182.1	lincRNA
G1S	ENSG00000254815	AP006284.1	antisense
G1S	ENSG00000254839	AF131215.3	lincRNA
G1S	ENSG00000254847	AC009806.1	lincRNA
G1S	ENSG00000254859	AC067930.4	antisense
G1S	ENSG00000255020	AF131216.3	antisense
G1S	ENSG00000255031	AP002807.1	antisense
G1S	ENSG00000255094	AC090159.1	lincRNA
G1S	ENSG00000255099	AC023245.2	processed_pseudogene
G1S	ENSG00000255108	AP006621.1	antisense
G1S	ENSG00000255121	AP003392.4	lincRNA
G1S	ENSG00000255129	AP000880.1	antisense
G1S	ENSG00000255142	AP006621.2	lincRNA
G1S	ENSG00000255240	AP001636.3	antisense
G1S	ENSG00000255282	WTAPP1	transcribed_processed_pseudogene
G1S	ENSG00000255284	AP006621.3	lincRNA
G1S	ENSG00000255337	AP001830.1	antisense
G1S	ENSG00000255345	AP002957.1	lincRNA
G1S	ENSG00000255458	AC108471.2	lincRNA
G1S	ENSG00000255471	AP001528.2	antisense
G1S	ENSG00000255559	ZNF252P-AS1	antisense
G1S	ENSG00000255710	AP003170.1	processed_pseudogene
G1S	ENSG00000255867	DENND5B-AS1	antisense
G1S	ENSG00000256312	AC138466.1	lincRNA
G1S	ENSG00000256321	AC087258.1	lincRNA
G1S	ENSG00000256331	NIFKP3	processed_pseudogene
G1S	ENSG00000256542	AC148477.2	antisense
G1S	ENSG00000256650	RERG-IT1	sense_intronic
G1S	ENSG00000256742	AC145422.1	lincRNA
G1S	ENSG00000256988	AC005833.2	lincRNA
G1S	ENSG00000257185	LINC02293	lincRNA
G1S	ENSG00000258053	AC025575.2	lincRNA
G1S	ENSG00000258199	AC073896.4	sense_overlapping
G1S	ENSG00000258487	LINC02277	lincRNA
G1S	ENSG00000258545	RHOXF1-AS1	antisense
G1S	ENSG00000258592	AL391152.1	lincRNA
G1S	ENSG00000258733	LINC02328	lincRNA
G1S	ENSG00000258743	LINC02301	lincRNA
G1S	ENSG00000258897	EGLN3-AS1	antisense
G1S	ENSG00000258940	AL132639.2	antisense
G1S	ENSG00000258969	LINC02307	lincRNA
G1S	ENSG00000259048	AL392023.2	antisense
G1S	ENSG00000259065	AC005520.2	antisense
G1S	ENSG00000259070	LINC00639	lincRNA
G1S	ENSG00000259153	AC004816.1	lincRNA
G1S	ENSG00000259178	AC023906.2	lincRNA
G1S	ENSG00000259209	AC004943.1	antisense
G1S	ENSG00000259295	CSPG4P12	transcribed_unprocessed_pseudogene
G1S	ENSG00000259315	ACTG1P17	transcribed_processed_pseudogene
G1S	ENSG00000259319	AF111167.2	antisense
G1S	ENSG00000259343	TMC3-AS1	antisense
G1S	ENSG00000259349	AC011921.1	antisense
G1S	ENSG00000259363	AC090825.1	lincRNA
G1S	ENSG00000259424	IRAIN	antisense
G1S	ENSG00000259430	CERS3-AS1	antisense
G1S	ENSG00000259518	LINC01583	lincRNA
G1S	ENSG00000259610	AC023034.2	lincRNA
G1S	ENSG00000259658	AC027559.1	transcribed_unprocessed_pseudogene
G1S	ENSG00000259719	LINC02284	lincRNA
G1S	ENSG00000259744	AC009269.4	sense_intronic
G1S	ENSG00000259786	LINC02109	lincRNA
G1S	ENSG00000259834	AL365361.1	lincRNA
G1S	ENSG00000259954	IL21R-AS1	antisense
G1S	ENSG00000259969	AL049838.1	sense_overlapping
G1S	ENSG00000260066	AC112176.1	lincRNA
G1S	ENSG00000260077	AC104794.2	lincRNA
G1S	ENSG00000260081	AF274858.1	transcribed_processed_pseudogene
G1S	ENSG00000260141	AC145350.2	lincRNA
G1S	ENSG00000260158	AC137761.1	lincRNA
G1S	ENSG00000260198	AC009102.1	sense_intronic
G1S	ENSG00000260232	PWRN4	lincRNA
G1S	ENSG00000260261	AC124944.3	transcribed_unprocessed_pseudogene
G1S	ENSG00000260352	AC092287.1	antisense
G1S	ENSG00000260400	AL513534.1	sense_overlapping
G1S	ENSG00000260409	AC012414.5	lincRNA
G1S	ENSG00000260412	AL353746.1	sense_overlapping
G1S	ENSG00000260442	ATP2A1-AS1	antisense
G1S	ENSG00000260500	AC010336.2	antisense
G1S	ENSG00000260577	AC126773.2	antisense
G1S	ENSG00000260584	AC142381.2	processed_pseudogene
G1S	ENSG00000260604	AL590004.3	lincRNA
G1S	ENSG00000260611	AC106785.2	lincRNA
G1S	ENSG00000260625	AC026471.2	antisense
G1S	ENSG00000260644	HERC2P5	transcribed_unprocessed_pseudogene
G1S	ENSG00000260645	AL359715.2	lincRNA
G1S	ENSG00000260650	AC010542.1	antisense
G1S	ENSG00000260653	AC237221.1	lincRNA
G1S	ENSG00000260725	AC005307.1	lincRNA
G1S	ENSG00000260750	AC092720.1	lincRNA
G1S	ENSG00000260777	AC061975.1	lincRNA
G1S	ENSG00000260793	AC003102.1	antisense
G1S	ENSG00000260798	AC099314.1	antisense
G1S	ENSG00000260857	AC018558.1	lincRNA
G1S	ENSG00000260874	AC106820.5	lincRNA
G1S	ENSG00000260947	AL356489.2	lincRNA
G1S	ENSG00000260949	AP006545.1	sense_overlapping
G1S	ENSG00000261038	AL133457.1	lincRNA
G1S	ENSG00000261039	LINC02544	lincRNA
G1S	ENSG00000261040	WFDC21P	transcribed_unitary_pseudogene
G1S	ENSG00000261054	AC036108.2	antisense
G1S	ENSG00000261251	Z97055.2	antisense
G1S	ENSG00000261302	AC106779.1	antisense
G1S	ENSG00000261319	LINC02152	lincRNA
G1S	ENSG00000261360	AC010491.1	antisense
G1S	ENSG00000261366	MANEA-DT	antisense
G1S	ENSG00000261524	ABCB10P3	processed_pseudogene
G1S	ENSG00000261572	AC097639.1	sense_intronic
G1S	ENSG00000261575	AC005829.1	transcribed_unprocessed_pseudogene
G1S	ENSG00000261599	HERC2P8	transcribed_unprocessed_pseudogene
G1S	ENSG00000261645	DISC1FP1	processed_transcript
G1S	ENSG00000261655	AC100803.2	sense_overlapping
G1S	ENSG00000261770	AC006504.1	lincRNA
G1S	ENSG00000261959	AC015909.3	antisense
G1S	ENSG00000262096	PCDHB19P	transcribed_unprocessed_pseudogene
G1S	ENSG00000262185	AC005736.1	lincRNA
G1S	ENSG00000262333	HNRNPA1P16	processed_pseudogene
G1S	ENSG00000262823	AC127521.1	antisense
G1S	ENSG00000262877	AC110285.2	lincRNA
G1S	ENSG00000263006	ROCK1P1	transcribed_unprocessed_pseudogene
G1S	ENSG00000263412	AC004477.1	processed_transcript
G1S	ENSG00000264015	AC124254.1	lincRNA
G1S	ENSG00000264278	ZNF236-DT	lincRNA
G1S	ENSG00000264672	SEPT4-AS1	antisense
G1S	ENSG00000264775	PPIAP14	processed_pseudogene
G1S	ENSG00000264843	AP001180.4	antisense
G1S	ENSG00000264956	AC138761.3	lincRNA
G1S	ENSG00000264964	AP001033.1	lincRNA
G1S	ENSG00000265015	AP005901.3	transcribed_processed_pseudogene
G1S	ENSG00000265055	AC145343.1	lincRNA
G1S	ENSG00000265349	AC118755.2	antisense
G1S	ENSG00000265413	AP001094.2	sense_intronic
G1S	ENSG00000265480	KRT18P55	transcribed_unprocessed_pseudogene
G1S	ENSG00000265702	AC005821.1	antisense
G1S	ENSG00000265750	AC090772.3	lincRNA
G1S	ENSG00000265888	DSCAS	antisense
G1S	ENSG00000265982	AC103810.3	unprocessed_pseudogene
G1S	ENSG00000266306	AC061975.5	unprocessed_pseudogene
G1S	ENSG00000266313	AC026254.2	lincRNA
G1S	ENSG00000266869	AC005993.1	lincRNA
G1S	ENSG00000266885	AC132825.4	transcribed_processed_pseudogene
G1S	ENSG00000266903	AC243964.2	antisense
G1S	ENSG00000266904	LINC00663	lincRNA
G1S	ENSG00000266970	AC061992.1	lincRNA
G1S	ENSG00000266983	AC011444.1	antisense
G1S	ENSG00000267016	AC111170.1	antisense
G1S	ENSG00000267030	AC011498.2	antisense
G1S	ENSG00000267080	ASB16-AS1	antisense
G1S	ENSG00000267191	AC006213.3	antisense
G1S	ENSG00000267199	AP001029.2	antisense
G1S	ENSG00000267248	AC025048.2	processed_transcript
G1S	ENSG00000267264	AC006504.3	processed_pseudogene
G1S	ENSG00000267272	LINC01140	lincRNA
G1S	ENSG00000267313	KC6	lincRNA
G1S	ENSG00000267327	AC009271.1	lincRNA
G1S	ENSG00000267345	AC010632.1	antisense
G1S	ENSG00000267370	AC008752.3	unprocessed_pseudogene
G1S	ENSG00000267394	AC004596.1	antisense
G1S	ENSG00000267416	AC025048.4	lincRNA
G1S	ENSG00000267424	AC020934.1	antisense
G1S	ENSG00000267500	ZNF887P	transcribed_unprocessed_pseudogene
G1S	ENSG00000267509	AC010511.1	lincRNA
G1S	ENSG00000267530	LINC01836	lincRNA
G1S	ENSG00000267546	AC015802.4	antisense
G1S	ENSG00000267666	AC004156.1	lincRNA
G1S	ENSG00000267707	AC015961.2	antisense
G1S	ENSG00000267780	AC021594.2	lincRNA
G1S	ENSG00000267886	AC074135.1	lincRNA
G1S	ENSG00000268204	AC008763.1	antisense
G1S	ENSG00000268324	LRRC2-AS1	antisense
G1S	ENSG00000268355	AC243960.3	lincRNA
G1S	ENSG00000268362	AC092279.1	lincRNA
G1S	ENSG00000268560	AC010636.1	lincRNA
G1S	ENSG00000268583	AC011466.1	antisense
G1S	ENSG00000268592	RAET1E-AS1	antisense
G1S	ENSG00000268658	LINC00664	lincRNA
G1S	ENSG00000268926	AL354861.3	lincRNA
G1S	ENSG00000269068	AC009955.4	antisense
G1S	ENSG00000269097	TPRG1LP1	processed_pseudogene
G1S	ENSG00000269388	AC018755.3	transcribed_processed_pseudogene
G1S	ENSG00000269514	AC024257.3	antisense
G1S	ENSG00000269609	RPARP-AS1	processed_transcript
G1S	ENSG00000269815	AC010463.3	sense_intronic
G1S	ENSG00000269834	ZNF528-AS1	processed_transcript
G1S	ENSG00000269837	IPO5P1	transcribed_processed_pseudogene
G1S	ENSG00000269842	AC011453.1	lincRNA
G1S	ENSG00000269938	AC068790.2	sense_intronic
G1S	ENSG00000269959	SPACA6P-AS	lincRNA
G1S	ENSG00000269978	AL359881.1	lincRNA
G1S	ENSG00000269997	AC068790.3	sense_intronic
G1S	ENSG00000270049	AC009061.2	antisense
G1S	ENSG00000270061	AC068790.5	sense_intronic
G1S	ENSG00000270095	AC068790.6	sense_intronic
G1S	ENSG00000270164	LINC01480	lincRNA
G1S	ENSG00000270332	SMC2-AS1	lincRNA
G1S	ENSG00000270504	AL391422.4	antisense
G1S	ENSG00000270533	CR382285.1	transcribed_processed_pseudogene
G1S	ENSG00000270557	AC013731.1	lincRNA
G1S	ENSG00000270605	AL353622.1	antisense
G1S	ENSG00000270673	YTHDF3-AS1	lincRNA
G1S	ENSG00000270761	AL355353.1	lincRNA
G1S	ENSG00000270876	ZNF30-AS1	lincRNA
G1S	ENSG00000270977	AC015849.5	lincRNA
G1S	ENSG00000271151	AC016737.1	lincRNA
G1S	ENSG00000271155	AL161729.1	antisense
G1S	ENSG00000271200	AC099791.2	lincRNA
G1S	ENSG00000271270	TMCC1-AS1	antisense
G1S	ENSG00000271335	AL117336.3	antisense
G1S	ENSG00000271380	AL451085.2	antisense
G1S	ENSG00000271387	AL445228.2	lincRNA
G1S	ENSG00000271395	LINC02336	lincRNA
G1S	ENSG00000271584	LINC02550	lincRNA
G1S	ENSG00000271646	AC099343.3	bidirectional_promoter_lncRNA
G1S	ENSG00000271855	AC073195.1	lincRNA
G1S	ENSG00000271947	AC017076.1	lincRNA
G1S	ENSG00000272195	AL356512.1	antisense
G1S	ENSG00000272205	AL451050.2	lincRNA
G1S	ENSG00000272221	AL645933.2	lincRNA
G1S	ENSG00000272374	Z97832.2	lincRNA
G1S	ENSG00000272473	AC006273.1	lincRNA
G1S	ENSG00000272482	AC254633.1	lincRNA
G1S	ENSG00000272502	AC104958.2	antisense
G1S	ENSG00000272523	LINC01023	lincRNA
G1S	ENSG00000272631	AC067750.1	antisense
G1S	ENSG00000272638	AC006027.1	antisense
G1S	ENSG00000272668	AL590560.1	antisense
G1S	ENSG00000272693	AC073107.1	transcribed_unprocessed_pseudogene
G1S	ENSG00000272702	AC010913.1	processed_transcript
G1S	ENSG00000272746	AP005131.7	sense_intronic
G1S	ENSG00000272791	AC073389.3	lincRNA
G1S	ENSG00000272854	AC004839.1	antisense
G1S	ENSG00000272870	AC097534.2	antisense
G1S	ENSG00000272872	AP000525.1	sense_intronic
G1S	ENSG00000272894	AC004982.2	lincRNA
G1S	ENSG00000273002	AL355388.2	antisense
G1S	ENSG00000273082	Z73429.1	antisense
G1S	ENSG00000273129	PACERR	lincRNA
G1S	ENSG00000273141	AP001269.4	antisense
G1S	ENSG00000273162	AL133215.2	lincRNA
G1S	ENSG00000273196	AC062037.2	antisense
G1S	ENSG00000273211	AC137630.4	lincRNA
G1S	ENSG00000273212	AC000068.2	antisense
G1S	ENSG00000273243	Z82243.1	lincRNA
G1S	ENSG00000273253	AL022328.4	antisense
G1S	ENSG00000273265	CNNM3-DT	lincRNA
G1S	ENSG00000273297	AC009275.1	lincRNA
G1S	ENSG00000273305	AC009237.15	lincRNA
G1S	ENSG00000273329	AC078846.1	lincRNA
G1S	ENSG00000273340	MICE	transcribed_unprocessed_pseudogene
G1S	ENSG00000273344	PAXIP1-AS1	lincRNA
G1S	ENSG00000273362	AP000547.2	lincRNA
G1S	ENSG00000273363	AL353801.3	sense_intronic
G1S	ENSG00000273472	AC096733.2	lincRNA
G1S	ENSG00000273599	AL731571.1	antisense
G1S	ENSG00000273639	AL512310.11	processed_transcript
G1S	ENSG00000273654	AC020904.2	transcribed_processed_pseudogene
G1S	ENSG00000273674	AC021752.1	lincRNA
G1S	ENSG00000273872	SLC25A15P4	unprocessed_pseudogene
G1S	ENSG00000274099	ABCB10P1	processed_pseudogene
G1S	ENSG00000274114	ALOX15P1	transcribed_unprocessed_pseudogene
G1S	ENSG00000274270	AL137060.1	sense_intronic
G1S	ENSG00000274680	MYO5BP1	processed_pseudogene
G1S	ENSG00000274767	AC243829.1	antisense
G1S	ENSG00000274928	KRT89P	transcribed_unprocessed_pseudogene
G1S	ENSG00000275212	AC005186.1	lincRNA
G1S	ENSG00000275223	AL121906.2	lincRNA
G1S	ENSG00000275437	AL121832.3	sense_intronic
G1S	ENSG00000275484	AP003419.3	lincRNA
G1S	ENSG00000275542	AC027601.3	lincRNA
G1S	ENSG00000275549	STPG3-AS1	antisense
G1S	ENSG00000275552	AC243965.2	antisense
G1S	ENSG00000275613	AC243830.1	lincRNA
G1S	ENSG00000275807	AC145285.6	antisense
G1S	ENSG00000275902	AC139530.3	antisense
G1S	ENSG00000276071	AC074138.1	lincRNA
G1S	ENSG00000276118	AC242852.1	unprocessed_pseudogene
G1S	ENSG00000276141	WHAMMP3	transcribed_unprocessed_pseudogene
G1S	ENSG00000276505	AP000892.2	sense_intronic
G1S	ENSG00000276710	CSPG4P10	transcribed_unprocessed_pseudogene
G1S	ENSG00000276772	AC025271.4	lincRNA
G1S	ENSG00000277112	ANKRD20A21P	transcribed_unprocessed_pseudogene
G1S	ENSG00000277152	AC110048.2	lincRNA
G1S	ENSG00000277287	AL109976.1	lincRNA
G1S	ENSG00000277382	AC005837.3	antisense
G1S	ENSG00000277511	AC116407.2	lincRNA
G1S	ENSG00000277741	GOLGA6L17P	transcribed_unprocessed_pseudogene
G1S	ENSG00000277744	AC011462.4	sense_intronic
G1S	ENSG00000277999	AC009093.6	lincRNA
G1S	ENSG00000278041	AL133325.3	lincRNA
G1S	ENSG00000278467	AC138393.3	lincRNA
G1S	ENSG00000278673	AC136352.4	pseudogene
G1S	ENSG00000278897	AC020951.1	TEC
G1S	ENSG00000278931	CR381670.1	unprocessed_pseudogene
G1S	ENSG00000278948	AL031587.5	TEC
G1S	ENSG00000279026	AC005225.4	TEC
G1S	ENSG00000279042	AP005242.4	TEC
G1S	ENSG00000279080	AL022322.2	antisense
G1S	ENSG00000279161	AC093503.3	TEC
G1S	ENSG00000279208	CR381653.2	unprocessed_pseudogene
G1S	ENSG00000279259	AC087741.3	TEC
G1S	ENSG00000279479	AP005205.3	TEC
G1S	ENSG00000279511	AL356274.2	TEC
G1S	ENSG00000279561	AL845472.2	TEC
G1S	ENSG00000279569	AC020763.4	TEC
G1S	ENSG00000279611	AC012313.10	TEC
G1S	ENSG00000279641	AC120057.3	TEC
G1S	ENSG00000279672	AP006621.5	TEC
G1S	ENSG00000279718	SNX18P12	processed_pseudogene
G1S	ENSG00000279726	AC005609.5	antisense
G1S	ENSG00000279742	AP000974.1	TEC
G1S	ENSG00000279771	AP000997.3	TEC
G1S	ENSG00000279803	AC009090.5	TEC
G1S	ENSG00000279821	AC145098.2	TEC
G1S	ENSG00000279837	AC112694.2	TEC
G1S	ENSG00000279873	LINC01126	lincRNA
G1S	ENSG00000279924	AL356585.4	unprocessed_pseudogene
G1S	ENSG00000280043	AC118282.4	TEC
G1S	ENSG00000280079	AC011447.7	TEC
G1S	ENSG00000280239	AC011498.7	TEC
G1S	ENSG00000280362	AC084759.3	TEC
G1S	ENSG00000280435	AC006058.4	TEC
G1S	ENSG00000280445	AL049536.1	lincRNA
G1S	ENSG00000280798	LINC00294	lincRNA
G1S	ENSG00000281128	PTENP1-AS	antisense
G1S	ENSG00000281358	RASSF1-AS1	antisense
G1S	ENSG00000281404	LINC01176	lincRNA
G1S	ENSG00000281468	AC006504.8	sense_intronic
G1S	ENSG00000281566	AL157778.1	lincRNA
G1S	ENSG00000282206	AC233280.19	unprocessed_pseudogene
G1S	ENSG00000282381	AC104073.4	lincRNA
G1S	ENSG00000282851	BISPR	lincRNA
G1S	ENSG00000282870	FRG1DP	unprocessed_pseudogene
G1S	ENSG00000283355	AC074194.2	TEC
G1S	ENSG00000283646	LINC02009	lincRNA
G1S	ENSG00000283674	AC068587.4	processed_transcript
G1S	ENSG00000283757	AL031686.1	processed_transcript
G1S	ENSG00000283828	AL137002.2	antisense
G1S	ENSG00000283897	AC011416.3	lincRNA
G1S	ENSG00000283982	AL445623.2	lincRNA
G1S	ENSG00000284060	AC002472.2	transcribed_unprocessed_pseudogene
G1S	ENSG00000284543	LINC01226	processed_transcript
G1S	ENSG00000284606	AC105233.5	processed_transcript
G1S	ENSG00000284634	AC092821.3	processed_transcript
G1S	ENSG00000284690	CD300H	polymorphic_pseudogene
G1S	ENSG00000284719	AL033527.5	lincRNA
G1S	ENSG00000285205	AL121612.2	bidirectional_promoter_lncRNA
G1S	ENSG00000285571	AL513548.4	lincRNA
G1S	ENSG00000285579	AC015687.1	processed_transcript
G1S	ENSG00000285588	AL160254.1	antisense
G1S	ENSG00000285644	AC108448.3	antisense
G1S	ENSG00000285696	AP002433.2	antisense
G1S	ENSG00000285699	AL360267.2	lincRNA
G1S	ENSG00000285706	AL807776.1	bidirectional_promoter_lncRNA
G1S	ENSG00000285799	AL645929.2	transcribed_unprocessed_pseudogene
G1S	ENSG00000285804	AC093218.1	antisense
G1S	ENSG00000285852	AL353147.1	bidirectional_promoter_lncRNA
G1S	ENSG00000285876	AC093912.1	lincRNA
G1S	ENSG00000285886	AC211476.6	lincRNA
S	ENSG00000128254	C22orf24	processed_transcript
S	ENSG00000131885	KRT17P1	transcribed_unprocessed_pseudogene
S	ENSG00000172460	PRSS30P	transcribed_unitary_pseudogene
S	ENSG00000173295	FAM86B3P	transcribed_unprocessed_pseudogene
S	ENSG00000175746	C15orf54	lincRNA
S	ENSG00000183822	NCF4-AS1	antisense
S	ENSG00000186831	KRT17P2	transcribed_unprocessed_pseudogene
S	ENSG00000188850	AC114947.1	transcribed_processed_pseudogene
S	ENSG00000189223	PAX8-AS1	processed_transcript
S	ENSG00000196979	AL360004.1	lincRNA
S	ENSG00000203446	AC004988.1	antisense
S	ENSG00000203709	MIR29B2CHG	lincRNA
S	ENSG00000203804	ADAMTSL4-AS1	processed_transcript
S	ENSG00000205215	KRT17P7	transcribed_unprocessed_pseudogene
S	ENSG00000205632	LINC01310	lincRNA
S	ENSG00000205890	AC108134.1	antisense
S	ENSG00000205913	SRRM2-AS1	antisense
S	ENSG00000213344	PCNPP3	processed_pseudogene
S	ENSG00000214146	LINC02026	lincRNA
S	ENSG00000214514	KRT42P	transcribed_unprocessed_pseudogene
S	ENSG00000214822	KRT16P3	transcribed_unprocessed_pseudogene
S	ENSG00000214856	KRT16P1	transcribed_unprocessed_pseudogene
S	ENSG00000215014	AL645728.1	processed_transcript
S	ENSG00000215296	TMCO5B	transcribed_unitary_pseudogene
S	ENSG00000223669	AL357033.2	antisense
S	ENSG00000224116	INHBA-AS1	antisense
S	ENSG00000224596	ZMIZ1-AS1	antisense
S	ENSG00000224635	AL391095.1	lincRNA
S	ENSG00000225335	AC016027.1	antisense
S	ENSG00000225339	AL354740.1	processed_transcript
S	ENSG00000225611	LINC02158	antisense
S	ENSG00000225670	CADM3-AS1	antisense
S	ENSG00000226125	LINC01907	lincRNA
S	ENSG00000226377	AC084809.1	antisense
S	ENSG00000226673	LINC01108	lincRNA
S	ENSG00000226798	AL138749.1	lincRNA
S	ENSG00000226828	AL591885.1	lincRNA
S	ENSG00000226833	AC092164.1	antisense
S	ENSG00000226921	LINC00454	lincRNA
S	ENSG00000226968	LINC00423	lincRNA
S	ENSG00000227036	LINC00511	processed_transcript
S	ENSG00000227300	KRT16P2	transcribed_unprocessed_pseudogene
S	ENSG00000227308	AC009502.1	lincRNA
S	ENSG00000227619	AL391056.1	lincRNA
S	ENSG00000228022	HCG20	lincRNA
S	ENSG00000228140	AL031283.1	lincRNA
S	ENSG00000228216	AL355607.1	lincRNA
S	ENSG00000228323	AC008440.1	antisense
S	ENSG00000228705	LINC00659	antisense
S	ENSG00000228714	AL691420.1	antisense
S	ENSG00000228775	WEE2-AS1	antisense
S	ENSG00000229191	AL358473.1	antisense
S	ENSG00000229334	AC046143.1	antisense
S	ENSG00000229647	MYOSLID	lincRNA
S	ENSG00000229848	AC139149.1	antisense
S	ENSG00000229915	AC016999.1	antisense
S	ENSG00000230359	TPI1P2	transcribed_processed_pseudogene
S	ENSG00000230650	AC140479.2	processed_pseudogene
S	ENSG00000230838	LINC01614	lincRNA
S	ENSG00000231090	MIR4422HG	lincRNA
S	ENSG00000231346	LINC01160	lincRNA
S	ENSG00000231441	AL512422.1	antisense
S	ENSG00000231645	KRT17P6	transcribed_unprocessed_pseudogene
S	ENSG00000231672	DIRC3	lincRNA
S	ENSG00000231948	HS1BP3-IT1	sense_intronic
S	ENSG00000232783	FRG2FP	transcribed_unprocessed_pseudogene
S	ENSG00000233128	LINC01794	lincRNA
S	ENSG00000233424	BX664718.1	lincRNA
S	ENSG00000233581	AC069155.1	antisense
S	ENSG00000233817	AL162727.1	lincRNA
S	ENSG00000233845	AC093732.1	antisense
S	ENSG00000234155	LINC02535	lincRNA
S	ENSG00000234362	LINC01914	lincRNA
S	ENSG00000234703	AF015262.1	lincRNA
S	ENSG00000234814	SVIL2P	transcribed_unprocessed_pseudogene
S	ENSG00000234859	AC003958.2	antisense
S	ENSG00000235927	NEXN-AS1	antisense
S	ENSG00000235947	EGOT	lincRNA
S	ENSG00000236056	GAPDHP14	processed_pseudogene
S	ENSG00000236094	LINC00545	lincRNA
S	ENSG00000236963	LINC01141	lincRNA
S	ENSG00000237015	AL031186.1	antisense
S	ENSG00000237624	OXCT2P1	unprocessed_pseudogene
S	ENSG00000237864	LINC00322	lincRNA
S	ENSG00000237879	LINC00398	lincRNA
S	ENSG00000238290	AL034417.2	lincRNA
S	ENSG00000239332	LINC01119	lincRNA
S	ENSG00000240405	SAMMSON	lincRNA
S	ENSG00000240541	TM4SF1-AS1	antisense
S	ENSG00000240859	AC093627.4	lincRNA
S	ENSG00000243225	AC007686.1	processed_pseudogene
S	ENSG00000244300	GATA2-AS1	antisense
S	ENSG00000244945	AC136604.2	antisense
S	ENSG00000245954	LINC02273	lincRNA
S	ENSG00000246145	RRS1-AS1	lincRNA
S	ENSG00000246308	AC116535.1	antisense
S	ENSG00000247993	FOXD1-AS1	lincRNA
S	ENSG00000248150	LINC02150	lincRNA
S	ENSG00000248323	LUCAT1	antisense
S	ENSG00000248724	NPHP3-AS1	antisense
S	ENSG00000248996	AC145098.1	antisense
S	ENSG00000249237	AL359273.1	transcribed_unitary_pseudogene
S	ENSG00000249526	AC008667.1	lincRNA
S	ENSG00000253106	AC090198.1	antisense
S	ENSG00000253161	LINC01605	lincRNA
S	ENSG00000253182	AC084026.1	lincRNA
S	ENSG00000253282	AP001330.1	lincRNA
S	ENSG00000253584	AC091987.1	lincRNA
S	ENSG00000253628	AC110011.1	lincRNA
S	ENSG00000253632	AC084026.2	lincRNA
S	ENSG00000253669	GASAL1	lincRNA
S	ENSG00000253686	LINC01484	lincRNA
S	ENSG00000254038	AC092818.1	lincRNA
S	ENSG00000254396	AL355432.1	lincRNA
S	ENSG00000254431	AC084083.1	antisense
S	ENSG00000254620	AL050327.1	lincRNA
S	ENSG00000254632	AP003119.1	antisense
S	ENSG00000254791	FAR1-IT1	sense_intronic
S	ENSG00000254842	LINC02551	lincRNA
S	ENSG00000254887	AC010247.1	processed_transcript
S	ENSG00000255202	AL049629.1	antisense
S	ENSG00000255317	AP002833.2	antisense
S	ENSG00000255750	AC022509.1	antisense
S	ENSG00000256083	AC090673.2	antisense
S	ENSG00000256196	AP003721.1	antisense
S	ENSG00000256268	LINC02454	lincRNA
S	ENSG00000256540	AC007406.3	lincRNA
S	ENSG00000256694	AC026369.2	antisense
S	ENSG00000257176	AC009318.1	antisense
S	ENSG00000257839	AC011611.4	antisense
S	ENSG00000258137	AC079313.2	antisense
S	ENSG00000258279	LINC00592	lincRNA
S	ENSG00000258303	AC012464.2	sense_intronic
S	ENSG00000258602	LINC01629	lincRNA
S	ENSG00000258794	DUX4L27	processed_pseudogene
S	ENSG00000259230	LINC02323	lincRNA
S	ENSG00000259354	AC025580.2	antisense
S	ENSG00000259523	AC022613.2	antisense
S	ENSG00000259672	AC087612.1	lincRNA
S	ENSG00000259712	AC023906.5	antisense
S	ENSG00000259727	AC103740.2	lincRNA
S	ENSG00000260139	CSPG4P13	transcribed_unprocessed_pseudogene
S	ENSG00000260219	AC106782.2	lincRNA
S	ENSG00000260267	AC026471.1	antisense
S	ENSG00000260328	AC104024.2	lincRNA
S	ENSG00000260504	AC010551.1	lincRNA
S	ENSG00000260807	AC009041.2	lincRNA
S	ENSG00000261055	AL450468.2	lincRNA
S	ENSG00000261068	AL512274.1	lincRNA
S	ENSG00000261116	AL049555.1	sense_overlapping
S	ENSG00000261578	AP003119.3	sense_overlapping
S	ENSG00000261618	AC083837.1	lincRNA
S	ENSG00000261651	AC136285.2	antisense
S	ENSG00000261888	AC144831.1	lincRNA
S	ENSG00000262769	AC025627.1	antisense
S	ENSG00000263731	AC145207.5	lincRNA
S	ENSG00000265148	TSPOAP1-AS1	antisense
S	ENSG00000267052	AC005050.1	lincRNA
S	ENSG00000267056	AC005336.1	processed_pseudogene
S	ENSG00000267375	AC008649.2	antisense
S	ENSG00000267475	AC008736.1	lincRNA
S	ENSG00000267685	NTF6B	unprocessed_pseudogene
S	ENSG00000267733	AP005264.5	transcribed_processed_pseudogene
S	ENSG00000267736	HMGB2P1	transcribed_processed_pseudogene
S	ENSG00000267801	AC087289.5	antisense
S	ENSG00000269275	AC020922.3	antisense
S	ENSG00000269976	AC012065.3	lincRNA
S	ENSG00000270096	AC078795.2	antisense
S	ENSG00000270607	AC009549.1	lincRNA
S	ENSG00000271474	AC106881.1	antisense
S	ENSG00000271856	LINC01215	lincRNA
S	ENSG00000272079	AC004233.3	lincRNA
S	ENSG00000272259	LINC01749	lincRNA
S	ENSG00000272825	AL844908.1	antisense
S	ENSG00000272841	AL139393.2	antisense
S	ENSG00000273056	AL354694.1	lincRNA
S	ENSG00000273108	AL121929.2	antisense
S	ENSG00000273143	AL355512.1	lincRNA
S	ENSG00000273489	AC008264.2	antisense
S	ENSG00000273812	BX640514.2	lincRNA
S	ENSG00000274653	AC106782.6	antisense
S	ENSG00000275367	AC092111.1	lincRNA
S	ENSG00000275393	AC018695.6	sense_intronic
S	ENSG00000275401	AL391095.3	lincRNA
S	ENSG00000275880	AL139385.1	antisense
S	ENSG00000276308	AC078880.4	lincRNA
S	ENSG00000276527	AL356515.1	lincRNA
S	ENSG00000277013	AC008556.1	lincRNA
S	ENSG00000277406	SEC22B4P	transcribed_unprocessed_pseudogene
S	ENSG00000277718	LINC02255	lincRNA
S	ENSG00000278973	AC073592.2	TEC
S	ENSG00000278989	AP001148.1	TEC
S	ENSG00000279118	AC093535.2	TEC
S	ENSG00000279489	AL355377.2	TEC
S	ENSG00000279631	AL158211.5	TEC
S	ENSG00000279633	AL137918.1	TEC
S	ENSG00000279675	AC080100.1	TEC
S	ENSG00000279739	AC011369.2	TEC
S	ENSG00000279770	LINC00552	TEC
S	ENSG00000279806	AC018629.1	TEC
S	ENSG00000279838	AL356273.3	TEC
S	ENSG00000279879	AC091152.4	TEC
S	ENSG00000280143	AP000892.3	TEC
S	ENSG00000280587	LINC01348	lincRNA
S	ENSG00000281207	SLFNL1-AS1	antisense
S	ENSG00000281832	LINC00602	lincRNA
S	ENSG00000282849	AL359834.1	lincRNA
S	ENSG00000283025	AC027045.3	antisense
S	ENSG00000283033	AC022596.2	lincRNA
S	ENSG00000283265	AL356234.3	lincRNA
S	ENSG00000284052	AC006460.2	bidirectional_promoter_lncRNA
S	ENSG00000284391	AL139398.1	antisense
S	ENSG00000285116	AC135068.10	unprocessed_pseudogene
S	ENSG00000285244	DINOL	bidirectional_promoter_lncRNA
S	ENSG00000285623	Z82202.2	lincRNA
S	ENSG00000285802	AL450043.1	lincRNA
S	ENSG00000285844	FO393414.3	bidirectional_promoter_lncRNA
S	ENSG00000285867	BX470102.2	lincRNA
S	ENSG00000285881	AC105206.3	antisense
S	ENSG00000285888	Z85996.2	lincRNA
S	ENSG00000285966	AC007686.4	lincRNA
S	ENSG00000285980	AP003025.2	antisense
G2	ENSG00000088340	FER1L4	transcribed_unitary_pseudogene
G2	ENSG00000166104	AC126323.1	transcribed_unprocessed_pseudogene
G2	ENSG00000171483	SSX6P	transcribed_unprocessed_pseudogene
G2	ENSG00000174353	STAG3L3	transcribed_unprocessed_pseudogene
G2	ENSG00000177410	ZFAS1	antisense
G2	ENSG00000178162	FAR2P2	transcribed_unprocessed_pseudogene
G2	ENSG00000181800	CELF2-AS1	antisense
G2	ENSG00000185186	LINC00313	lincRNA
G2	ENSG00000187721	GTF2IP3	unprocessed_pseudogene
G2	ENSG00000189423	USP32P3	transcribed_unprocessed_pseudogene
G2	ENSG00000196143	OR11H13P	unprocessed_pseudogene
G2	ENSG00000196593	ANKRD20A19P	transcribed_unprocessed_pseudogene
G2	ENSG00000197989	SNHG12	antisense
G2	ENSG00000198590	C3orf35	processed_transcript
G2	ENSG00000203645	LINC00501	lincRNA
G2	ENSG00000203875	SNHG5	processed_transcript
G2	ENSG00000204177	BMS1P1	transcribed_unprocessed_pseudogene
G2	ENSG00000204434	POTEKP	unprocessed_pseudogene
G2	ENSG00000205583	STAG3L1	transcribed_unprocessed_pseudogene
G2	ENSG00000205702	CYP2D7	polymorphic_pseudogene
G2	ENSG00000213073	AL353625.1	transcribed_processed_pseudogene
G2	ENSG00000214049	UCA1	lincRNA
G2	ENSG00000214081	CYP4F30P	transcribed_unprocessed_pseudogene
G2	ENSG00000214815	IMPDH1P3	processed_pseudogene
G2	ENSG00000215158	AC138409.2	transcribed_unprocessed_pseudogene
G2	ENSG00000215769	ARHGAP27P1-BPTFP1-KPNA2P3	processed_transcript
G2	ENSG00000216809	AL589993.1	processed_pseudogene
G2	ENSG00000219395	HSPA8P15	processed_pseudogene
G2	ENSG00000223564	CYP4F32P	unprocessed_pseudogene
G2	ENSG00000223720	AL109659.1	lincRNA
G2	ENSG00000223756	TSSC2	transcribed_unprocessed_pseudogene
G2	ENSG00000223831	AC005006.1	sense_intronic
G2	ENSG00000224099	AC104823.1	lincRNA
G2	ENSG00000224566	FAM96AP2	processed_pseudogene
G2	ENSG00000224709	OR11M1P	unitary_pseudogene
G2	ENSG00000224723	GUSBP10	unprocessed_pseudogene
G2	ENSG00000224763	FDPSP8	processed_pseudogene
G2	ENSG00000224975	INE1	sense_intronic
G2	ENSG00000225328	LINC01594	antisense
G2	ENSG00000225418	AKR1C5P	unprocessed_pseudogene
G2	ENSG00000225420	AC104134.1	antisense
G2	ENSG00000225447	RPS15AP10	processed_pseudogene
G2	ENSG00000226057	PHF2P2	transcribed_unprocessed_pseudogene
G2	ENSG00000226450	CYP2D8P	unprocessed_pseudogene
G2	ENSG00000226480	OR7H1P	unprocessed_pseudogene
G2	ENSG00000227045	AL589765.1	antisense
G2	ENSG00000227398	KIF9-AS1	antisense
G2	ENSG00000227706	AL713998.1	lincRNA
G2	ENSG00000227954	TARID	antisense
G2	ENSG00000228107	AP000692.1	sense_overlapping
G2	ENSG00000228252	COL6A4P2	transcribed_unitary_pseudogene
G2	ENSG00000228629	AC092295.1	antisense
G2	ENSG00000228793	AL138881.1	lincRNA
G2	ENSG00000229056	AC020571.1	antisense
G2	ENSG00000229089	ANKRD20A8P	transcribed_unprocessed_pseudogene
G2	ENSG00000229325	ACAP2-IT1	sense_intronic
G2	ENSG00000229375	USP24P1	unprocessed_pseudogene
G2	ENSG00000229425	AJ009632.2	lincRNA
G2	ENSG00000229771	AL035665.1	lincRNA
G2	ENSG00000230333	AC004160.1	processed_transcript
G2	ENSG00000230498	AL035409.1	antisense
G2	ENSG00000230551	AC021078.1	processed_transcript
G2	ENSG00000230590	FTX	lincRNA
G2	ENSG00000230666	CEACAM22P	transcribed_unprocessed_pseudogene
G2	ENSG00000230715	AC018638.2	processed_pseudogene
G2	ENSG00000230869	AGAP10P	unprocessed_pseudogene
G2	ENSG00000231125	AF129075.1	sense_intronic
G2	ENSG00000231131	LNCAROD	lincRNA
G2	ENSG00000231298	MANCR	lincRNA
G2	ENSG00000231431	FAR2P4	transcribed_unprocessed_pseudogene
G2	ENSG00000231439	WASIR2	lincRNA
G2	ENSG00000231969	AC007364.1	antisense
G2	ENSG00000232502	AC073464.1	processed_pseudogene
G2	ENSG00000232732	AC097717.1	processed_transcript
G2	ENSG00000233327	USP32P2	transcribed_unprocessed_pseudogene
G2	ENSG00000233515	LINC01518	lincRNA
G2	ENSG00000233585	AC231533.2	transcribed_processed_pseudogene
G2	ENSG00000233602	ERI3-IT1	sense_intronic
G2	ENSG00000234741	GAS5	processed_transcript
G2	ENSG00000234771	SLC25A25-AS1	antisense
G2	ENSG00000234996	AC098934.2	transcribed_processed_pseudogene
G2	ENSG00000235081	AC245052.3	processed_pseudogene
G2	ENSG00000235500	SNX19P2	processed_pseudogene
G2	ENSG00000235571	SNX18P14	processed_pseudogene
G2	ENSG00000235703	LINC00894	antisense
G2	ENSG00000235890	TSPEAR-AS1	antisense
G2	ENSG00000236039	AC019117.1	lincRNA
G2	ENSG00000236047	AC073410.1	processed_pseudogene
G2	ENSG00000236261	AC064862.4	unprocessed_pseudogene
G2	ENSG00000236345	AL354719.2	antisense
G2	ENSG00000236780	LINC01829	lincRNA
G2	ENSG00000236953	ZDHHC20-IT1	sense_intronic
G2	ENSG00000237055	MTCO1P48	processed_pseudogene
G2	ENSG00000237094	AL732372.2	transcribed_unprocessed_pseudogene
G2	ENSG00000237152	DLEU7-AS1	antisense
G2	ENSG00000237200	ZBTB40-IT1	sense_intronic
G2	ENSG00000237548	TTLL11-IT1	lincRNA
G2	ENSG00000237639	AC064862.5	unprocessed_pseudogene
G2	ENSG00000237950	AL357079.1	antisense
G2	ENSG00000238035	AC138035.1	lincRNA
G2	ENSG00000239402	CYP4F62P	transcribed_unprocessed_pseudogene
G2	ENSG00000239827	SUGT1P3	transcribed_unprocessed_pseudogene
G2	ENSG00000240731	AL139287.1	sense_intronic
G2	ENSG00000241120	HMGN1P8	processed_pseudogene
G2	ENSG00000241362	RPL36AP43	processed_pseudogene
G2	ENSG00000241634	AC069499.1	processed_pseudogene
G2	ENSG00000241671	AC117394.1	processed_pseudogene
G2	ENSG00000242294	STAG3L5P	transcribed_unprocessed_pseudogene
G2	ENSG00000242588	AC108010.1	processed_transcript
G2	ENSG00000243289	AGAP13P	unprocessed_pseudogene
G2	ENSG00000243302	AC018638.4	processed_pseudogene
G2	ENSG00000243679	AC018638.5	processed_pseudogene
G2	ENSG00000244167	AC005532.2	processed_pseudogene
G2	ENSG00000244468	AC093001.1	antisense
G2	ENSG00000247157	LINC01252	lincRNA
G2	ENSG00000247627	MTND4P12	processed_pseudogene
G2	ENSG00000248112	AC108174.1	lincRNA
G2	ENSG00000248458	AL139147.1	antisense
G2	ENSG00000248527	MTATP6P1	unprocessed_pseudogene
G2	ENSG00000248587	GDNF-AS1	antisense
G2	ENSG00000248596	AC139491.2	processed_transcript
G2	ENSG00000248936	AC027607.1	antisense
G2	ENSG00000249849	AC138819.1	antisense
G2	ENSG00000249855	EEF1A1P19	processed_pseudogene
G2	ENSG00000249857	AC027338.2	lincRNA
G2	ENSG00000249867	AC090833.1	lincRNA
G2	ENSG00000250271	AC068647.2	transcribed_unprocessed_pseudogene
G2	ENSG00000250787	HMGN1P17	processed_pseudogene
G2	ENSG00000251011	TMEM108-AS1	antisense
G2	ENSG00000251273	LINC02228	lincRNA
G2	ENSG00000251458	AC139491.4	lincRNA
G2	ENSG00000251562	MALAT1	lincRNA
G2	ENSG00000251600	AC139713.2	processed_transcript
G2	ENSG00000251623	AC139491.5	transcribed_processed_pseudogene
G2	ENSG00000251768	RNA5SP217	rRNA_pseudogene
G2	ENSG00000252690	AC105339.2	processed_transcript
G2	ENSG00000253476	AC091185.1	lincRNA
G2	ENSG00000253503	AC060765.1	lincRNA
G2	ENSG00000253636	AC022893.1	antisense
G2	ENSG00000253888	AC090150.1	antisense
G2	ENSG00000254165	AC090739.1	antisense
G2	ENSG00000254166	CASC19	processed_transcript
G2	ENSG00000254226	LINC01933	lincRNA
G2	ENSG00000254463	PPIAP41	processed_pseudogene
G2	ENSG00000254526	AC090791.1	lincRNA
G2	ENSG00000254577	AC087276.1	sense_overlapping
G2	ENSG00000254606	AC013714.1	lincRNA
G2	ENSG00000254676	AP000873.4	sense_overlapping
G2	ENSG00000254687	AC009646.2	antisense
G2	ENSG00000255176	AP000941.1	antisense
G2	ENSG00000255197	AC090559.1	antisense
G2	ENSG00000255227	AC090124.2	lincRNA
G2	ENSG00000255234	AP000446.1	antisense
G2	ENSG00000255363	AP001189.5	lincRNA
G2	ENSG00000255364	SMILR	lincRNA
G2	ENSG00000255644	AC010185.1	antisense
G2	ENSG00000256615	AC010197.1	antisense
G2	ENSG00000256651	AC006518.1	unprocessed_pseudogene
G2	ENSG00000256667	KLRA1P	transcribed_unprocessed_pseudogene
G2	ENSG00000257243	AC020612.1	processed_pseudogene
G2	ENSG00000257475	AC068888.2	sense_intronic
G2	ENSG00000257621	PSMA3-AS1	antisense
G2	ENSG00000257662	EIF4A1P12	processed_pseudogene
G2	ENSG00000257803	AC010200.1	processed_pseudogene
G2	ENSG00000258027	NF1P4	unprocessed_pseudogene
G2	ENSG00000258077	AC078923.1	lincRNA
G2	ENSG00000258559	AC005519.1	sense_overlapping
G2	ENSG00000258682	AL132989.1	sense_overlapping
G2	ENSG00000258791	LINC00520	lincRNA
G2	ENSG00000258859	LINC02296	lincRNA
G2	ENSG00000259005	AC005479.1	lincRNA
G2	ENSG00000259033	AL356804.1	lincRNA
G2	ENSG00000259158	ADAM20P1	transcribed_unprocessed_pseudogene
G2	ENSG00000259254	AC022405.1	sense_intronic
G2	ENSG00000259562	AC090607.2	transcribed_processed_pseudogene
G2	ENSG00000259659	AC009996.1	sense_intronic
G2	ENSG00000259732	AC092757.2	sense_overlapping
G2	ENSG00000259767	AC022558.1	sense_intronic
G2	ENSG00000259807	AC009093.1	lincRNA
G2	ENSG00000259868	AL163952.1	processed_transcript
G2	ENSG00000259878	AC126323.3	lincRNA
G2	ENSG00000259939	AC022167.1	antisense
G2	ENSG00000260062	GOLGA2P11	transcribed_unprocessed_pseudogene
G2	ENSG00000260144	AC100827.2	unprocessed_pseudogene
G2	ENSG00000260296	AC095057.3	sense_overlapping
G2	ENSG00000260375	AC126323.4	unprocessed_pseudogene
G2	ENSG00000260648	AC020658.3	sense_intronic
G2	ENSG00000260751	AC008870.2	sense_intronic
G2	ENSG00000260774	AC021087.2	processed_transcript
G2	ENSG00000260896	ARLNC1	lincRNA
G2	ENSG00000261123	AC009065.5	sense_intronic
G2	ENSG00000261136	AC023908.3	antisense
G2	ENSG00000261373	VPS9D1-AS1	antisense
G2	ENSG00000261534	AL596244.1	sense_overlapping
G2	ENSG00000261553	AL137782.1	processed_transcript
G2	ENSG00000261560	AC007216.3	sense_intronic
G2	ENSG00000261744	AC116552.1	antisense
G2	ENSG00000261971	MMP25-AS1	antisense
G2	ENSG00000262663	AC087222.1	lincRNA
G2	ENSG00000262766	AC135050.5	sense_intronic
G2	ENSG00000263126	AC040162.3	lincRNA
G2	ENSG00000263786	AC022211.1	sense_intronic
G2	ENSG00000264188	AC106037.1	sense_intronic
G2	ENSG00000264334	AC134978.1	lincRNA
G2	ENSG00000264743	DPRXP4	processed_pseudogene
G2	ENSG00000265233	ABBA01006766.1	processed_pseudogene
G2	ENSG00000265766	CXADRP3	transcribed_processed_pseudogene
G2	ENSG00000265800	AC022211.3	sense_intronic
G2	ENSG00000265843	LINC01029	lincRNA
G2	ENSG00000266236	NARF-IT1	sense_intronic
G2	ENSG00000266743	AC103808.6	lincRNA
G2	ENSG00000266777	SH3GL1P1	transcribed_processed_pseudogene
G2	ENSG00000266924	AC021594.1	lincRNA
G2	ENSG00000267614	AC245748.3	lincRNA
G2	ENSG00000267648	AC060766.5	transcribed_processed_pseudogene
G2	ENSG00000267686	AC090771.2	lincRNA
G2	ENSG00000268108	AC008687.2	antisense
G2	ENSG00000268201	AC020915.2	sense_intronic
G2	ENSG00000268287	AC008687.3	lincRNA
G2	ENSG00000268499	AC011479.2	sense_intronic
G2	ENSG00000268743	AC008737.1	sense_intronic
G2	ENSG00000268896	AC009955.3	antisense
G2	ENSG00000269821	KCNQ1OT1	antisense
G2	ENSG00000269954	AC022239.1	antisense
G2	ENSG00000269974	AC091057.4	lincRNA
G2	ENSG00000270000	AC005479.2	lincRNA
G2	ENSG00000270012	AC232271.1	lincRNA
G2	ENSG00000270015	AC087481.3	sense_intronic
G2	ENSG00000270108	AL049840.5	sense_intronic
G2	ENSG00000270165	AC010530.1	sense_intronic
G2	ENSG00000270580	PKD1P6-NPIPP1	processed_transcript
G2	ENSG00000270704	AC124312.4	sense_intronic
G2	ENSG00000271021	AC239600.1	processed_pseudogene
G2	ENSG00000271209	BRDTP1	processed_pseudogene
G2	ENSG00000271347	AC124312.5	sense_intronic
G2	ENSG00000271533	Z83843.1	sense_intronic
G2	ENSG00000271590	AC108463.3	lincRNA
G2	ENSG00000271795	AC011337.1	antisense
G2	ENSG00000271833	AL445222.1	sense_intronic
G2	ENSG00000271862	AC104118.1	lincRNA
G2	ENSG00000272054	AC007390.2	sense_intronic
G2	ENSG00000272071	AC122710.3	lincRNA
G2	ENSG00000272505	AC104964.3	lincRNA
G2	ENSG00000272574	AL596325.2	sense_intronic
G2	ENSG00000272752	STAG3L5P-PVRIG2P-PILRB	processed_transcript
G2	ENSG00000272918	AC005070.3	antisense
G2	ENSG00000273007	AC021205.3	antisense
G2	ENSG00000273096	AL021707.8	sense_intronic
G2	ENSG00000273345	AC104109.4	processed_transcript
G2	ENSG00000273353	AL008718.3	sense_intronic
G2	ENSG00000273373	AL355488.1	antisense
G2	ENSG00000273588	AC093838.1	unprocessed_pseudogene
G2	ENSG00000273973	AC025162.2	sense_intronic
G2	ENSG00000274238	AC097478.2	antisense
G2	ENSG00000274297	AC009269.5	sense_intronic
G2	ENSG00000274422	AC245060.5	lincRNA
G2	ENSG00000274461	AL391425.1	processed_transcript
G2	ENSG00000274602	PI4KAP1	transcribed_unprocessed_pseudogene
G2	ENSG00000274776	AC090241.3	lincRNA
G2	ENSG00000275318	AL136981.2	unprocessed_pseudogene
G2	ENSG00000275560	AC008115.3	sense_intronic
G2	ENSG00000276115	AC026356.2	sense_intronic
G2	ENSG00000276248	AL442125.1	sense_intronic
G2	ENSG00000276934	AC009704.2	sense_intronic
G2	ENSG00000277072	STAG3L2	transcribed_unprocessed_pseudogene
G2	ENSG00000277297	ATP5F1AP10	processed_pseudogene
G2	ENSG00000277728	AC097641.2	antisense
G2	ENSG00000277883	NLRP3P1	unprocessed_pseudogene
G2	ENSG00000278133	AC135050.6	sense_intronic
G2	ENSG00000278861	AC117503.2	TEC
G2	ENSG00000278959	AC006378.2	TEC
G2	ENSG00000279030	AC007336.3	TEC
G2	ENSG00000279066	HEXDC-IT1	sense_intronic
G2	ENSG00000279191	AC068491.4	TEC
G2	ENSG00000279192	PWAR5	TEC
G2	ENSG00000279355	AGPAT4-IT1	TEC
G2	ENSG00000279676	AC011483.3	TEC
G2	ENSG00000279688	AQP7P3	unprocessed_pseudogene
G2	ENSG00000279712	FP325330.3	lincRNA
G2	ENSG00000279794	AC024580.1	TEC
G2	ENSG00000279812	AC120057.4	TEC
G2	ENSG00000279998	FP475955.3	lincRNA
G2	ENSG00000280063	AC012676.5	TEC
G2	ENSG00000280069	AC127024.8	TEC
G2	ENSG00000280136	AC240565.1	lincRNA
G2	ENSG00000280184	AL023806.3	TEC
G2	ENSG00000280228	AC079753.1	TEC
G2	ENSG00000280279	AC240565.2	lincRNA
G2	ENSG00000280347	AC000123.3	TEC
G2	ENSG00000280543	ASAP1-IT2	sense_intronic
G2	ENSG00000280639	LINC02204	lincRNA
G2	ENSG00000280734	LINC01232	processed_transcript
G2	ENSG00000281183	NPTN-IT1	sense_intronic
G2	ENSG00000281344	HELLPAR	macro_lncRNA
G2	ENSG00000281398	SNHG4	lincRNA
G2	ENSG00000283064	AL353759.1	antisense
G2	ENSG00000283235	AC139493.2	processed_transcript
G2	ENSG00000283311	MTND6P29	unprocessed_pseudogene
G2	ENSG00000283578	MTND5P42	processed_pseudogene
G2	ENSG00000283709	FAM238C	transcribed_unprocessed_pseudogene
G2	ENSG00000283879	AC132825.5	unprocessed_pseudogene
G2	ENSG00000284630	AP000553.5	transcribed_unitary_pseudogene
G2	ENSG00000284656	AL645937.4	lincRNA
G2	ENSG00000284837	AC007846.1	lincRNA
G2	ENSG00000284879	AC133644.3	processed_transcript
G2	ENSG00000285190	AC018754.1	antisense
G2	ENSG00000285534	AL163541.1	lincRNA
G2	ENSG00000285648	AC137735.2	lincRNA
G2	ENSG00000285730	Z94721.3	bidirectional_promoter_lncRNA
G2	ENSG00000285873	AL445253.1	bidirectional_promoter_lncRNA
M	ENSG00000078319	PMS2P1	unprocessed_pseudogene
M	ENSG00000103832	GOLGA8UP	unprocessed_pseudogene
M	ENSG00000160172	FAM86C2P	transcribed_unprocessed_pseudogene
M	ENSG00000171084	FAM86JP	transcribed_unprocessed_pseudogene
M	ENSG00000183458	AC138932.1	transcribed_unprocessed_pseudogene
M	ENSG00000183604	SMG1P5	transcribed_unprocessed_pseudogene
M	ENSG00000184441	AP001062.1	antisense
M	ENSG00000187951	AC091057.1	processed_transcript
M	ENSG00000198416	ZNF658B	transcribed_unprocessed_pseudogene
M	ENSG00000199804	RNA5SP383	rRNA_pseudogene
M	ENSG00000203644	AC083799.1	sense_intronic
M	ENSG00000204789	ZNF204P	processed_pseudogene
M	ENSG00000205628	LINC01446	lincRNA
M	ENSG00000205746	AC126755.1	transcribed_unprocessed_pseudogene
M	ENSG00000212978	AC016747.1	processed_transcript
M	ENSG00000214783	POLR2J4	processed_transcript
M	ENSG00000214832	UPF3AP2	transcribed_processed_pseudogene
M	ENSG00000215424	MCM3AP-AS1	antisense
M	ENSG00000215630	GUSBP9	unprocessed_pseudogene
M	ENSG00000217648	AL136116.3	processed_pseudogene
M	ENSG00000220685	AL139094.1	processed_pseudogene
M	ENSG00000223768	LINC00205	bidirectional_promoter_lncRNA
M	ENSG00000224886	AL132656.1	transcribed_processed_pseudogene
M	ENSG00000226318	RPS3AP38	processed_pseudogene
M	ENSG00000227082	AC244021.1	lincRNA
M	ENSG00000227110	LMCD1-AS1	antisense
M	ENSG00000227827	AC138969.1	unprocessed_pseudogene
M	ENSG00000228137	AP001469.2	antisense
M	ENSG00000228623	ZNF883	transcribed_unprocessed_pseudogene
M	ENSG00000229619	MBNL1-AS1	antisense
M	ENSG00000229816	DDX50P1	processed_pseudogene
M	ENSG00000230309	AL121718.1	lincRNA
M	ENSG00000231007	CDC20P1	processed_pseudogene
M	ENSG00000232328	AC084030.1	lincRNA
M	ENSG00000232725	U52111.1	antisense
M	ENSG00000233514	AL356653.1	processed_pseudogene
M	ENSG00000233639	PANTR1	processed_transcript
M	ENSG00000234129	AC073529.1	lincRNA
M	ENSG00000234684	SDCBP2-AS1	antisense
M	ENSG00000235072	AC012074.1	lincRNA
M	ENSG00000235499	AC073046.1	lincRNA
M	ENSG00000235748	SEPT14P12	processed_pseudogene
M	ENSG00000236451	AC067956.1	lincRNA
M	ENSG00000236889	AC244035.2	lincRNA
M	ENSG00000237212	AL449403.1	lincRNA
M	ENSG00000237296	SMG1P1	transcribed_unprocessed_pseudogene
M	ENSG00000239415	AP001469.3	antisense
M	ENSG00000242021	AC112493.1	lincRNA
M	ENSG00000242512	LINC01206	lincRNA
M	ENSG00000242779	ZNF702P	transcribed_processed_pseudogene
M	ENSG00000245937	LINC01184	lincRNA
M	ENSG00000246763	RGMB-AS1	antisense
M	ENSG00000247134	AC090204.1	lincRNA
M	ENSG00000247675	LRP4-AS1	antisense
M	ENSG00000247796	AC008966.1	antisense
M	ENSG00000248008	NRAV	antisense
M	ENSG00000248663	LINC00992	lincRNA
M	ENSG00000248927	AC114284.1	lincRNA
M	ENSG00000249279	LINC02057	lincRNA
M	ENSG00000249456	AL731577.2	sense_overlapping
M	ENSG00000249685	AC079921.2	lincRNA
M	ENSG00000249743	AC116345.1	lincRNA
M	ENSG00000250251	PKD1P6	transcribed_unprocessed_pseudogene
M	ENSG00000250474	WBP1LP2	processed_pseudogene
M	ENSG00000251031	AC132803.1	lincRNA
M	ENSG00000251485	AC068134.3	processed_pseudogene
M	ENSG00000251595	ABCA11P	transcribed_processed_pseudogene
M	ENSG00000251602	AL928654.1	antisense
M	ENSG00000253301	LINC01606	lincRNA
M	ENSG00000254186	AC113414.1	antisense
M	ENSG00000254302	AC087855.2	lincRNA
M	ENSG00000254602	AP000662.1	sense_overlapping
M	ENSG00000254681	PKD1P5	transcribed_unprocessed_pseudogene
M	ENSG00000255394	C8orf49	lincRNA
M	ENSG00000255441	AC008750.2	antisense
M	ENSG00000255495	AC145124.1	antisense
M	ENSG00000256151	ADGRD1-AS1	lincRNA
M	ENSG00000256152	AC027290.1	lincRNA
M	ENSG00000256663	AC112777.1	processed_pseudogene
M	ENSG00000257038	AP002761.3	antisense
M	ENSG00000257496	AC025031.1	lincRNA
M	ENSG00000258081	AL110292.1	lincRNA
M	ENSG00000258101	AC010173.1	antisense
[truncated: 45 more rows]
