# Supplementary material for: The S-phase-induced lncRNA SUNO1 promotes cell proliferation by controlling YAP1/Hippo signaling pathway
Source: eLife. 2020 Oct 27;9:e55102. doi: 10.7554/eLife.55102 (PMC7591261; doi:10.7554/eLife.55102)
Supplement: Supplementary file 6. [file elife-55102-supp6.xlsx]

## Sheet: CTL vs KD-36hr
SYMBOL	ACCESSION	ProbeID	Chr	Start	logFC	Fold change (siSUNO1-a vs siNC)	t	P.Value	adj.P.Val	rowMean	rowMeanPctl	rowVar	rowVarPctl	CTL-12hr_KD_no_DOX_1	CTL-12hr_KD_no_DOX_2	si7b-12hr_KD_no_DOX_1	si7b-12hr_KD_no_DOX_2
KRT80	NM_182507.2	4830520	12	52563537	-2.064	0.239152	-7.86	4.1e-05	0.566	6.96	83.634	1.475	99.975	8.0538	7.9343	5.6484	6.2124
NBPF5	XR_000523.1	3420102	1	108729969	-1.902	0.267572	-3.71	0.00557	0.566	3.74	3.983	1.797	99.981	4.6074	4.7818	3.729	1.8554
COQ2	NM_015697.6	5720128	4	84404171	-1.831	0.28107	-6.53	0.000156	0.566	8.1	90.165	1.2	99.956	8.9855	9.0419	6.8319	7.5328
LOC100101266	NR_003603.1	6450193	19	24345157	-1.813	0.284599	-1.83	0.102621	0.677	2.86	0.008	3.66	99.998	4.0605	3.4725	0.0144	3.8922
UBE2N	NM_003348.3	270156	12	93802263	-1.777	0.29179	-6.98	9.7e-05	0.566	8.56	92.3	1.097	99.947	9.4023	9.4935	7.4179	7.9236
MOBKL3	NM_199482.2	6940307	2	198125341	-1.755	0.296273	-6.76	0.000121	0.566	7.79	88.522	1.078	99.941	8.6625	8.6823	6.6409	7.1935
CTAG1A	NM_139250.1	1430215	X	153466617	-1.745	0.298334	-3.81	0.004861	0.566	3.73	3.682	1.461	99.972	4.5558	4.6524	3.6752	2.0426
CTGF	NM_001901.1	5690687	6	132311203	-1.713	0.305025	-6.53	0.000157	0.566	7.02	83.945	1.033	99.934	7.7438	8.0002	5.9019	6.417
LOC392843	XM_374586.3	2450370	7	150519897	-1.612	0.327145	-2.32	0.04765	0.62	3.26	0.051	2.061	99.987	4.2275	3.9011	1.1235	3.7817
KRTAP4-2	NM_033062.2	1580634	17	39333906	-1.577	0.335178	-3.61	0.006533	0.566	3.3	0.083	1.222	99.958	4.6576	3.5113	1.9963	3.0192
BTBD3	NM_014962.2	6020653	20	11854867	-1.569	0.337042	-6.89	0.000106	0.566	7.17	84.917	0.828	99.841	8.0617	7.8492	6.3615	6.4122
RAC2	NM_002872.3	110382	22	37621465	-1.566	0.337744	-6.59	0.000145	0.566	8.53	92.181	0.838	99.848	9.2149	9.4121	7.6013	7.8938
PREI3	NM_199482.1	240288	2	198125136	-1.543	0.343171	-6.68	0.000133	0.566	8.18	90.557	0.806	99.82	8.93	8.9657	7.2706	7.5396
UBA7	NM_003335.2	2850202	3	49842665	-1.541	0.343647	-2.54	0.03381	0.609	4.17	34.655	1.673	99.979	5.0521	4.837	2.2586	4.5491
KIAA1618	NM_020954.2	7400743	17	75909786	-1.522	0.348203	-6.05	0.000266	0.566	5.85	75.87	0.811	99.826	6.5826	6.644	4.8496	5.3337
ATP11C	NM_173694.3	6040204	X	138808842	-1.508	0.351598	-6.29	0.000202	0.566	6.31	79.333	0.781	99.807	7.0525	7.0662	5.739	5.3644
MOBKL3	NM_001100819.1	6510669	2	198124637	-1.5	0.353553	-5.87	0.000326	0.566	7.09	84.409	0.795	99.812	7.8573	7.8282	6.0833	6.6028
LEPROTL1	NM_015344.1	6370164	8	30084876	-1.497	0.354289	-6.67	0.000134	0.566	8.03	89.824	0.751	99.782	8.797	8.7636	7.208	7.3583
GADD45B	NM_015675.2	4920110	19	2429063	-1.493	0.355273	-6.51	0.000159	0.566	6.31	79.382	0.753	99.79	7.18	6.9393	5.5387	5.5949
LOC441031	XM_498974.2	4070041	4	97450937	-1.468	0.361483	-4.65	0.001506	0.566	3.75	4.158	0.859	99.86	4.1798	4.7896	2.6733	3.3606
BCAP29	NM_001008405.1	5090086	7	107041359	-1.467	0.361734	-5.48	0.000522	0.566	3.72	3.352	0.78	99.805	4.2683	4.6377	3.232	2.7403
RNF12	NM_183353.1	1470402	X	73726913	-1.46	0.363493	-1.87	0.096882	0.671	3.35	0.136	2.256	99.989	3.7863	4.3696	4.1127	1.1235
LOC100129412	XM_001724449.1	150168	1	151051694	-1.455	0.364755	-6.38	0.000183	0.566	3.71	3.244	0.715	99.748	4.5558	4.3293	2.9769	2.9972
POLR3G	NM_006467.2	3400037	5	89809735	-1.445	0.367292	-6.28	0.000204	0.566	8.66	92.723	0.707	99.746	9.3755	9.3941	7.8109	8.0678
ITGA2	NM_002203.3	3890541	5	52386964	-1.444	0.367547	-6.01	0.000279	0.566	5.82	75.633	0.719	99.754	6.3477	6.7308	5.0982	5.093
SYPL1	NM_182715.1	1190452	7	105731442	-1.431	0.370874	-5.98	0.000289	0.566	8.86	93.487	0.706	99.742	9.6845	9.4648	7.9926	8.2949
EMP1	NM_001423.1	3940435	12	13260606	-1.43	0.371131	-5.34	0.000617	0.566	5.93	76.528	0.745	99.776	6.4539	6.8416	5.4563	4.9782
GABRB3	NM_000814.4	1710528	15	26792115	-1.406	0.377356	-3.58	0.006828	0.566	3.61	1.323	0.952	99.915	4.121	4.4972	3.5377	2.2678
LOC647370	XM_936444.1	5220075			-1.39	0.381565	-4.3	0.002395	0.566	3.88	10.07	0.797	99.816	5.0228	4.1375	3.0071	3.3734
ANKRD58	XM_293380.4	5270474	X	118776630	-1.377	0.385019	-2.96	0.017348	0.587	3.82	6.544	1.093	99.945	4.724	4.2888	3.9322	2.3265
RAB23	NM_016277.3	6020719	6	57161608	-1.373	0.386088	-4.29	0.002443	0.566	7.49	86.833	0.776	99.801	7.7963	8.5531	6.522	7.0822
INHBC	NM_005538.2	2350093	12	56130442	-1.367	0.387697	-6.06	0.000264	0.566	3.95	14.304	0.628	99.581	4.5414	4.7209	3.2472	3.2818
MAGED4	NM_001098800.1	1090762	X	51929024	-1.365	0.388234	-1.29	0.232761	0.758	2.79	0.002	3.594	99.994	3.7545	3.1899	4.1995	0.0144
GPRC5A	NM_003979.3	5690270	12	12957521	-1.361	0.389312	-5.82	0.000346	0.566	5.44	72.393	0.633	99.591	5.965	6.2727	4.7663	4.7503
TMEM19	NM_018279.3	110196	12	70383455	-1.351	0.39202	-5.37	0.000591	0.566	6.15	78.161	0.648	99.623	6.9843	6.6697	5.2895	5.6617
APOBEC3B	NM_004900.3	3170068	22	37715452	-1.342	0.394473	-4.99	0.000954	0.566	6.24	78.868	0.665	99.661	6.8711	6.9554	5.2632	5.8791
DNAJB6	NM_058246.3	5860315	7	156902552	-1.339	0.395295	-5.76	0.000371	0.566	7.47	86.712	0.612	99.543	8.2749	8.006	6.746	6.8566
LOC650985	XM_940092.1	1780301			-1.335	0.396392	-4.34	0.002286	0.566	3.86	8.719	0.721	99.757	4.4412	4.6161	3.6204	2.7667
SIX4	NM_017420.3	20653	14	61176419	-1.322	0.39998	-5.19	0.000746	0.566	8.08	90.091	0.626	99.574	8.7574	8.7321	7.1661	7.6803
CD9	NM_001769.2	6250487	12	6214685	-1.32	0.400535	-5.69	0.000406	0.566	7.63	87.686	0.594	99.502	8.2038	8.3799	6.8585	7.0856
HOXA2	NM_006735.3	4260692	7	27140421	-1.309	0.403601	-4.31	0.00238	0.566	5.23	70.257	0.691	99.727	5.8131	5.9486	4.153	4.9904
IRF2BP2	NM_182972.2	3290224	1	234740591	-1.303	0.405283	-5.74	0.000381	0.566	6.79	82.594	0.574	99.454	7.4744	7.4162	6.2432	6.0405
KIAA0101	NM_014736.4	5090754	15	64669038	-1.298	0.40669	-5.83	0.000342	0.566	9.35	95.118	0.564	99.405	9.996	10.0103	8.6521	8.7578
PDLIM3	NM_014476.1	770463	4	186660434	-1.297	0.406972	-5.77	0.000369	0.566	5.85	75.842	0.565	99.416	6.4315	6.5629	5.2525	5.1478
HIF1AN	NM_017902.2	2070095	10	102299012	-1.297	0.406972	-5.59	0.000455	0.566	6.49	80.581	0.574	99.456	7.0648	7.2069	5.7148	5.9627
DPY19L4	NM_181787.1	2190544	8	95872884	-1.294	0.407819	-4.69	0.001413	0.566	6.43	80.235	0.633	99.596	7.1369	7.0254	5.4563	6.1176
AHNAK	NM_001620.1	2810482	11	62301545	-1.286	0.410086	-5.59	0.000457	0.566	4.48	55.781	0.563	99.397	5.0871	5.1519	3.707	3.9596
LOC728701	XM_001128647.2	5130592	9	67898483	-1.277	0.412653	-3.41	0.008689	0.566	3.85	8.306	0.795	99.814	4.3082	4.6763	3.8009	2.6289
RAB11FIP2	NM_014904.1	4760630	10	119754684	-1.275	0.413225	-5.49	0.000516	0.566	7.46	86.617	0.556	99.371	8.1509	8.0365	6.6843	6.9528
DGKA	NM_001345.4	460064	12	54611341	-1.269	0.414947	-5.2	0.000733	0.566	3.72	3.335	0.566	99.42	4.4679	4.2395	3.2605	2.9085
TGFBR2	NM_001024847.2	6560091	3	30709225	-1.267	0.415523	-5.3	0.000651	0.566	5.8	75.467	0.558	99.375	6.4369	6.4228	4.9782	5.3484
BHLHB2	NM_003670.1	2640735	3	5001452	-1.266	0.415811	-4.51	0.001811	0.566	8.76	93.144	0.617	99.557	9.3922	9.3936	7.7751	8.4794
KRT81	NM_002281.2	430446	12	50966078	-1.262	0.416966	-4.92	0.001048	0.566	4.84	65.537	0.578	99.466	5.2042	5.7333	4.2145	4.1983
WFDC13	NM_172005.1	6110379	20	43770490	-1.257	0.418413	-3.94	0.003989	0.566	3.72	3.487	0.672	99.682	4.3452	4.3604	3.5633	2.6289
UHRF1	NM_001048201.1	2940110	19	4912360	-1.242	0.422786	-5.31	0.00064	0.566	9.62	95.873	0.53	99.255	10.3269	10.1574	8.87	9.1299
SCML1	NM_001037540.1	1430152	X	17682478	-1.241	0.423079	-5.22	0.000719	0.566	6.5	80.648	0.535	99.267	6.956	7.2785	5.8001	5.9524
KRTAP6-2	NM_181604.1	5860056	21	31971119	-1.234	0.425137	-4.89	0.00109	0.566	3.73	3.625	0.548	99.331	4.4888	4.2047	2.9109	3.3152
PLAUR	NM_001005376.1	360475	19	48842368	-1.229	0.426613	-5.47	0.000529	0.566	6.7	81.984	0.508	99.134	7.2315	7.3982	6.0921	6.0793
LOC645441	XM_930470.2	6250035	1	77367120	-1.226	0.427501	-2.55	0.033064	0.609	3.57	0.976	1.003	99.928	4.1025	4.2647	3.8215	2.0942
LYPLA1	NM_006330.2	70300	8	55126215	-1.225	0.427798	-4.44	0.001991	0.566	6.26	79.018	0.576	99.46	6.7211	7.0315	5.3529	5.9495
LOC643365	XM_928445.1	360458	13	113491347	-1.225	0.427798	-3.43	0.008464	0.566	4.18	35.115	0.717	99.75	4.8098	4.775	4.1375	2.9972
BMP6	NM_001718.4	6980064	6	7825617	-1.221	0.428985	-3.59	0.006697	0.566	5.13	69.274	0.681	99.708	5.3721	6.1021	4.1375	4.8955
RAB15	NM_198686.1	5720392	14	64482581	-1.219	0.42958	-5.2	0.000738	0.566	5.26	70.585	0.512	99.162	5.8321	5.9023	4.4936	4.8035
FAHD1	NM_031208.2	5090592	16	1818355	-1.218	0.429878	-5.28	0.000663	0.566	3.94	13.733	0.506	99.119	4.4824	4.6161	3.2167	3.4461
DDEF2	NM_003887.1	2030041	2	9462928	-1.217	0.430176	-4.38	0.002151	0.566	6.88	83.096	0.571	99.443	7.65	7.3234	5.9697	6.5702
SCML2	NM_006089.1	70112	X	18168178	-1.215	0.430773	-4.12	0.00308	0.566	5.92	76.378	0.596	99.509	6.363	6.6837	5.6708	4.9469
CECR1	NM_017424.2	4010427	22	17687974	-1.211	0.431969	-4.37	0.002184	0.566	3.73	3.635	0.566	99.418	4.5792	4.0924	3.3618	2.887
KCNIP2	NM_173197.2	1850358	10	103593602	-1.208	0.432868	-1.93	0.088856	0.665	3.64	1.81	1.436	99.968	4.0864	4.4062	1.8554	4.2216
MGC44328	NM_001004344.1	7040373	20	18309796	-1.207	0.433168	-3.49	0.00777	0.566	3.88	9.593	0.681	99.704	4.0518	4.9073	2.9409	3.6047
ZAK	NM_133646.2	4670059	2	173799586	-1.206	0.433469	-4.99	0.000957	0.566	8.39	91.605	0.511	99.157	9.0079	8.9876	7.5934	7.9896
PRAMEF10	NM_001039361.2	4390131	1	12877087	-1.206	0.433469	-4.08	0.003284	0.566	3.61	1.416	0.591	99.494	4.4056	4.0266	3.3618	2.6585
RBMS1	NM_002897.3	4150639	2	160843364	-1.205	0.433769	-5.19	0.00074	0.566	6.77	82.461	0.497	99.051	7.3865	7.3584	6.0259	6.3096
MYADM	NM_001020820.1	2970730	19	54379429	-1.205	0.433769	-4.77	0.00127	0.566	9.3	94.969	0.525	99.223	9.6788	10.123	8.5873	8.8053
PLAUR	NM_001005376.1	6220671	19	48848309	-1.204	0.43407	-4.98	0.000976	0.566	6.83	82.827	0.51	99.145	7.4116	7.4608	6.0338	6.4305
LOC731823	XM_001133747.1	940156			-1.202	0.434672	-4.22	0.002681	0.566	3.55	0.771	0.571	99.439	3.9969	4.2979	3.2776	2.6124
PRO0611	NR_002762.1	1240754	1	31234006	-1.199	0.435577	-4.69	0.001416	0.566	3.5	0.523	0.524	99.221	4.2047	3.9886	2.6607	3.1349
MSX1	NM_002448.3	1010333	4	4865147	-1.196	0.436484	-5.3	0.000647	0.566	11.45	98.78	0.483	98.958	11.9917	12.1015	10.7769	10.9236
BTBD3	NM_014962.2	10608	20	11854410	-1.195	0.436786	-5.15	0.000787	0.566	6.29	79.219	0.49	99.005	6.905	6.8722	5.5495	5.8371
CKAP2	NM_001098525.1	1050672	13	51947829	-1.191	0.437999	-4.95	0.001004	0.566	6.51	80.71	0.498	99.056	7.1346	7.0726	5.7225	6.1021
DYRK2	NM_003583.2	2100743	12	66340325	-1.188	0.438911	-5.21	0.000728	0.566	7.42	86.418	0.479	98.929	8.0039	8.025	6.7126	6.9403
ARID3B	NM_006465.2	5960670	15	72677313	-1.179	0.441658	-4.16	0.002926	0.566	6.78	82.503	0.55	99.342	7.7053	7.0332	6.0584	6.3216
LOC649159	NM_001040069.1	4490113	16	33868633	-1.173	0.443498	-4.04	0.00349	0.566	3.92	12.308	0.557	99.373	4.8836	4.1293	3.2605	3.4058
MAMDC2	NM_153267.3	1300470	9	72031386	-1.172	0.443806	-5.05	0.000887	0.566	3.61	1.433	0.472	98.872	4.2047	4.1963	2.8853	3.1716
CPEB1	NM_001079534.1	7510603	15	83212843	-1.172	0.443806	-3.03	0.01561	0.587	3.9	11.209	0.736	99.765	4.4335	4.5465	3.961	2.6751
MIR591	NR_030322.1	2690736			-1.169	0.444729	-3.59	0.006717	0.566	3.83	7.269	0.614	99.547	4.6771	4.1612	2.8364	3.6638
LYPLA1	NM_006330.2	4480451	8	55121872	-1.165	0.445964	-4.79	0.001243	0.566	5.09	68.955	0.48	98.937	5.857	5.4973	4.413	4.6122
ORM1	NM_000607.1	2850315	9	116126187	-1.164	0.446273	-4.59	0.001628	0.566	4.71	63.306	0.494	99.026	5.0665	5.5255	4.026	4.2388
ARL8B	NM_018184.2	130685	3	5196802	-1.162	0.446893	-4.83	0.001187	0.566	7.99	89.63	0.475	98.895	8.4965	8.6532	7.2354	7.5904
FAM73A	NM_198549.1	2320097	1	78116356	-1.162	0.446893	-3.91	0.004207	0.566	4.27	43.084	0.56	99.384	4.5019	5.2047	3.893	3.4891
KRTAP22-2	NM_001164434.1	4390204			-1.161	0.447202	-3.86	0.004469	0.566	3.94	13.449	0.564	99.411	4.515	4.5177	2.9409	3.7694
PRAMEF5	NM_001013407.1	940176	1	13238864	-1.158	0.448133	-4.48	0.001875	0.566	3.92	12.56	0.496	99.043	4.724	4.2808	3.5019	3.1864
ADD2	NM_017483.2	2630021	2	70922898	-1.158	0.448133	-4.26	0.002551	0.566	3.5	0.517	0.517	99.181	4.2683	3.8816	3.1746	2.6585
LOC643834	XM_932200.1	3780201	11	60735548	-1.158	0.448133	-2.53	0.034227	0.609	3.74	3.856	0.89	99.877	4.2351	4.3993	2.3484	3.9703
ABCA4	NM_000350.2	6650504	1	94458480	-1.154	0.449378	-4.05	0.003417	0.566	4.68	62.542	0.533	99.261	5.4707	5.0418	4.3983	3.807
C8orf13	NM_053279.1	4010184	8	11316511	-1.152	0.450001	-4.84	0.00117	0.566	5.2	69.988	0.464	98.814	5.6654	5.8855	4.7663	4.4797
GLI2	NM_005270.3	5290427	2	121465002	-1.151	0.450313	-5	0.000943	0.566	4.8	64.938	0.453	98.702	5.4395	5.3112	4.1127	4.3362
MIR215	NR_029628.1	4050615			-1.147	0.451563	-3.48	0.00787	0.566	3.93	13.049	0.603	99.528	4.5098	4.4972	3.854	2.8597
F2R	NM_001992.2	4570398	5	76066216	-1.142	0.453131	-5.15	0.000784	0.566	6	77.085	0.436	98.541	6.5812	6.5644	5.3938	5.4669
PLA2G3	NM_015715.3	50626	22	31530905	-1.138	0.454389	-4.94	0.001023	0.566	6.97	83.695	0.443	98.6	7.6583	7.4162	6.4507	6.3478
FLJ16171	NM_001004348.1	3190184	5	174279192	-1.133	0.455967	-4.83	0.001176	0.566	3.73	3.8	0.444	98.622	4.2508	4.3527	3.3187	3.0192
SNORD56	NR_002739.1	2450020	20	2585290	-1.133	0.455967	-4.13	0.003046	0.566	7.22	85.236	0.501	99.083	8.058	7.5124	6.838	6.4659
IRF2BP2	NM_182972.2	6660768	1	234743250	-1.131	0.456599	-4.37	0.002197	0.566	5.69	74.616	0.477	98.907	6.2014	6.3017	5.3904	4.85
UPP1	NM_003364.2	7570673	7	48114453	-1.13	0.456916	-4.52	0.001778	0.566	8.21	90.731	0.463	98.808	8.7873	8.7654	7.4091	7.883
VIM	NM_003380.2	7050019	10	17317867	-1.128	0.45755	-4.73	0.001351	0.566	5.59	73.78	0.446	98.643	6.2186	6.09	5.197	4.8563
LOC647229	XM_930273.1	5090369	16	33668931	-1.127	0.457867	-3.01	0.016234	0.587	3.88	9.826	0.677	99.695	4.3838	4.5051	2.7034	3.9306
	BX090520	4060521	16	53506736	-1.125	0.458502	-3.2	0.012006	0.583	3.63	1.662	0.628	99.583	4.6136	3.7748	2.7034	3.4341
	AB074172	4010100	5	55269084	-1.121	0.459775	-4.95	0.001005	0.566	6.12	77.902	0.425	98.41	6.5789	6.7727	5.5684	5.5411
F2RL1	NM_005242.3	5810047	5	76166279	-1.119	0.460413	-4.95	0.001004	0.566	7.84	88.747	0.423	98.395	8.3138	8.4784	7.2322	7.3217
AFM	NM_001133.2	3120681	4	74368819	-1.117	0.461052	-3.05	0.015177	0.587	3.82	6.589	0.651	99.632	4.1705	4.5833	2.7034	3.8173
CENPQ	NM_018132.3	2350630	6	49460397	-1.116	0.461371	-4.22	0.002689	0.566	6.14	78.089	0.473	98.886	6.4539	6.9475	5.4227	5.7464
REEP4	NM_025232.2	450196	8	22051677	-1.113	0.462332	-4.79	0.001249	0.566	6.23	78.808	0.427	98.437	6.7736	6.8085	5.8233	5.5324
CTSL1	NM_001912.3	840717	9	89531002	-1.113	0.462332	-4.74	0.001331	0.566	5.23	70.31	0.43	98.473	5.6346	5.9411	4.6248	4.7249
COMMD2	NM_016094.2	6560020	3	150941394	-1.112	0.462652	-4.85	0.001157	0.566	7.16	84.853	0.423	98.391	7.6311	7.8003	6.6962	6.5106
LOC203547	NM_001017980.2	7550743	X	150328271	-1.108	0.463937	-4.26	0.002547	0.566	8.85	93.437	0.461	98.789	9.4518	9.3473	8.0174	8.5653
	BM682355	4490670	6	170312538	-1.101	0.466193	-3.56	0.006962	0.566	4.21	37.967	0.533	99.263	4.9942	4.5332	3.2889	4.037
CNTN1	NM_001843.2	3890364	12	39709271	-1.101	0.466193	-2.91	0.018893	0.587	3.61	1.344	0.664	99.659	4.3082	4.0074	2.4503	3.6638
SLC2A3	NM_006931.1	3800168	12	7963180	-1.099	0.46684	-4.69	0.001424	0.566	5.25	70.462	0.42	98.351	5.7707	5.8237	4.8546	4.5414
MANEA	NM_024641.2	3840181	6	96053710	-1.097	0.467488	-4.4	0.002086	0.566	4.21	38.119	0.438	98.56	4.9735	4.5541	3.5633	3.7694
MGAT5B	NM_144677.2	2470195	17	72457592	-1.097	0.467488	-3.52	0.007413	0.566	4.53	58.034	0.535	99.27	4.7569	5.406	4.2918	3.6767
TRAK2	NM_015049.1	110075	2	201950317	-1.094	0.468461	-4.72	0.001371	0.566	7.27	85.543	0.413	98.243	7.8445	7.7882	6.5825	6.8622
LOC653587	XM_932741.1	5560719	1	51206393	-1.094	0.468461	-3.02	0.015848	0.587	3.64	1.749	0.625	99.57	3.9306	4.4391	2.5663	3.616
DNAJB9	NM_012328.1	2760164	7	108002326	-1.092	0.469111	-4.06	0.003368	0.566	6.69	81.927	0.462	98.793	7.122	7.3548	5.8576	6.4352
LOC100133118	XM_001719352.1	2360500	1	76938093	-1.092	0.469111	-3.79	0.004995	0.566	4.1	27.984	0.492	99.015	4.3978	4.9012	3.2776	3.8376
CKAP2L	NM_152515.2	6380324	2	113212054	-1.089	0.470087	-4.04	0.003483	0.566	7.64	87.733	0.461	98.791	8.3206	8.0466	6.8114	7.3775
KRTAP9-8	XM_937208.1	1260209			-1.088	0.470413	-2.81	0.022044	0.595	3.58	1.05	0.674	99.691	4.2207	4.0266	3.6752	2.3953
ID2	NM_002166.4	1260086	2	8739817	-1.087	0.470739	-4.24	0.00263	0.566	6.85	82.882	0.44	98.573	7.6078	7.1714	6.4523	6.1538
ADD3	NM_001121.2	1990468	10	111883660	-1.087	0.470739	-3.65	0.006071	0.566	7.87	88.961	0.503	99.111	8.2102	8.624	6.9819	7.6781
MAMLD1	NM_005491.2	2320343	X	149432768	-1.085	0.471392	-3.14	0.013265	0.587	5.6	73.901	0.587	99.488	6.1556	6.1363	4.5203	5.6023
ALPK2	NM_052947.3	5270519	18	56148547	-1.082	0.472374	-3.97	0.003836	0.566	5.59	73.799	0.46	98.78	6.0974	6.1713	5.3746	4.7303
LOC342934	XM_292724.5	1570278	19	61411864	-1.074	0.475	-2.03	0.075211	0.655	3.62	1.541	1.02	99.932	3.9409	4.3778	2.1336	4.037
PIM1	NM_002648.2	3130301	6	37250764	-1.069	0.476649	-4.14	0.003003	0.566	6.07	77.58	0.429	98.463	6.6721	6.5349	5.2733	5.7965
	BX098094	630021	9	88561285	-1.066	0.477641	-2.86	0.020453	0.587	4.19	35.794	0.627	99.577	4.9639	4.4759	4.2145	3.0943
F2RL1	NM_005242.3	1050068	5	76166727	-1.065	0.477973	-4.11	0.003151	0.566	8.46	91.855	0.429	98.454	8.9384	9.0441	7.6556	8.1965
CYP26B1	NM_019885.2	6280224	2	72356794	-1.064	0.478304	-3.89	0.004333	0.566	7.64	87.731	0.449	98.67	8.3369	8.0046	6.8235	7.3905
PCDHA1	NM_031411.1	4040050	5	140146773	-1.063	0.478636	-3.85	0.004591	0.566	4.04	22.46	0.453	98.706	4.2508	4.9012	3.4207	3.6047
GATA6	NM_005257.3	2490594	18	18036132	-1.063	0.478636	-3.63	0.006337	0.566	4.74	63.719	0.479	98.922	5.5579	4.9753	3.9417	4.4657
	AJ420516	6580674	6	11246423	-1.062	0.478968	-4.56	0.001681	0.566	6.24	78.863	0.391	97.9	6.6282	6.9178	5.6789	5.7423
LARP6	NM_018357.2	4830433	15	71123993	-1.061	0.4793	-4.49	0.001859	0.566	7.2	85.137	0.395	97.967	7.7322	7.7327	6.5013	6.8414
CTGF	NM_001901.2	2640292	6	132311214	-1.058	0.480297	-3.55	0.007044	0.566	6.17	78.277	0.483	98.956	6.3551	7.0345	5.4158	5.8583
UCP1	NM_021833.3	4390348	4	141702929	-1.057	0.48063	-3.78	0.005035	0.566	4.24	40.194	0.453	98.713	4.7436	4.7896	3.3618	4.0567
MANEA	NM_024641.2	4610091	6	96056815	-1.056	0.480964	-4.15	0.002985	0.566	6.11	77.87	0.416	98.3	6.496	6.7808	5.3683	5.7965
FAM55B	NM_182495.5	3060491	11	114577553	-1.056	0.480964	-4.13	0.003057	0.566	4.18	35.629	0.418	98.329	4.4824	4.9448	3.78	3.5344
ATP8B2	NM_020452.2	6960168	1	152590047	-1.055	0.481297	-4.64	0.001508	0.566	6.54	80.966	0.378	97.69	6.9816	7.1609	6.0723	5.9603
YAP1	NM_006106.2	3360768	11	101608998	-1.055	0.481297	-4.61	0.001582	0.566	7.08	84.339	0.38	97.722	7.5473	7.6663	6.4479	6.6563
NPFFR2	NM_004885.1	4260128	4	73232141	-1.055	0.481297	-2.67	0.027354	0.609	4.25	41.494	0.667	99.668	4.285	5.2773	4.1698	3.2818
KATNAL1	NM_001014380.1	2470600	13	30777013	-1.054	0.481631	-4.66	0.001476	0.566	6.65	81.701	0.376	97.65	7.1656	7.1958	6.2217	6.0324
KIAA1609	NM_020947.3	620110	16	84510278	-1.054	0.481631	-4.57	0.001666	0.566	4.58	59.679	0.383	97.751	5.0022	5.2047	3.961	4.1368
TAGLN	NM_003186.3	650678	11	116580580	-1.052	0.482299	-3.85	0.004551	0.566	6.37	79.757	0.44	98.569	6.6028	7.18	5.688	5.9915
R3HDML	NM_178491.2	4570397	20	42412875	-1.051	0.482634	-2.64	0.028926	0.609	3.98	17.188	0.671	99.678	4.9249	4.0924	3.9886	2.9275
TWISTNB	NM_001002926.1	5570343	7	19735411	-1.05	0.482968	-3.59	0.006729	0.566	6.07	77.576	0.47	98.855	6.4622	6.725	5.1747	5.9117
RAB11FIP2	NM_014904.1	4860180	10	119754953	-1.049	0.483303	-4.42	0.002031	0.566	6.5	80.68	0.387	97.823	7.1555	6.8999	6.0967	5.8615
LOC729218	XM_001129698.1	3440148	4	119725535	-1.048	0.483638	-4.55	0.001723	0.566	4.13	30.637	0.378	97.684	4.6646	4.6457	3.7399	3.4737
MAK	NM_005906.3	1440044	6	10871282	-1.048	0.483638	-3.61	0.006504	0.566	3.69	2.744	0.464	98.812	4.3221	4.1119	3.5377	2.8005
HEPACAM2	NM_198151.1	4560619	7	92848792	-1.048	0.483638	-3.48	0.007835	0.566	3.75	4.156	0.481	98.948	4.6576	3.8922	3.0649	3.3885
	DV080421	7210500	10	133781033	-1.048	0.483638	-2.74	0.02465	0.603	3.93	12.879	0.635	99.6	4.2275	4.6763	2.8092	3.9985
PDGFB	NM_002608.1	4040397	22	37950040	-1.047	0.483974	-4.61	0.00158	0.566	5.32	71.279	0.373	97.574	5.9253	5.7682	4.8696	4.7303
LOC647865	XM_936929.1	6940592			-1.046	0.484309	-2.09	0.068916	0.647	3.31	0.097	0.923	99.903	4.2047	3.4583	3.6204	1.9499
WASL	NM_003941.2	6380138	7	123322280	-1.045	0.484645	-4.7	0.001403	0.566	8.18	90.568	0.366	97.428	8.7502	8.6532	7.6583	7.655
RALGDS	NM_006266.2	770349	9	135996371	-1.045	0.484645	-3.67	0.005898	0.566	3.42	0.26	0.452	98.698	3.6514	4.2305	3.1167	2.6751
COL28	XM_295195.6	3800739	7	7543355	-1.044	0.484981	-4.38	0.002157	0.566	4.01	19.415	0.385	97.796	4.7101	4.3527	3.5157	3.4594
KRT86	NM_002284.3	4280672	12	50989023	-1.043	0.485317	-3.68	0.005881	0.566	4.28	43.291	0.449	98.675	4.4754	5.1166	3.5866	3.9203
TGFBR2	NM_001024847.1	5490070	3	30710194	-1.042	0.485654	-4.67	0.001466	0.566	6.48	80.559	0.364	97.396	6.9752	7.0345	5.9071	6.0189
	AW117187	3140600	5	50346963	-1.042	0.485654	-3.12	0.01365	0.587	4.29	44.308	0.535	99.278	4.9528	4.6646	3.2776	4.2558
TSPY2	NM_022573.2	3850326	Y	6116915	-1.04	0.486327	-4.69	0.001419	0.566	3.68	2.477	0.361	97.339	4.1798	4.2216	3.1864	3.1349
RUNX1	NM_001754.3	7400368	21	35082209	-1.039	0.486665	-4.39	0.002139	0.566	5.36	71.713	0.379	97.705	5.8819	5.8855	5.0175	4.673
PBX3	NM_006195.4	2470634	9	127769242	-1.037	0.48734	-3.78	0.005014	0.566	6.63	81.554	0.431	98.482	7.0648	7.2337	5.7938	6.4305
SUMO3	NM_006936.2	5900682	21	46225734	-1.037	0.48734	-3.68	0.005838	0.566	9.02	94.038	0.443	98.596	9.6102	9.4686	8.154	8.8505
C21orf114	NM_001012707.1	3290093	21	18001586	-1.037	0.48734	-2.56	0.032922	0.609	3.6	1.281	0.679	99.699	4.5491	3.6949	3.6302	2.5389
NT5E	NM_002526.1	5960398	6	86261733	-1.036	0.487678	-4.45	0.001962	0.566	6.44	80.286	0.372	97.565	6.8751	7.0465	5.8043	6.0457
C19orf71	NM_001135580.1	4120382	19	3543646	-1.035	0.488016	-3.51	0.007535	0.566	4.3	45.214	0.462	98.8	5.2144	4.4214	3.7588	3.807
KRT80	NM_182507.2	2340193	12	52563035	-1.029	0.49005	-4.42	0.002039	0.566	5.47	72.717	0.368	97.47	6.1331	5.8432	4.927	4.9904
PDLIM3	NM_014476.1	6330008	4	186660357	-1.029	0.49005	-3.83	0.004701	0.566	6.9	83.212	0.417	98.315	7.1962	7.6285	6.1611	6.6066
ALCAM	NM_001627.2	2070575	3	105295394	-1.028	0.49039	-4.63	0.001544	0.566	7.33	85.886	0.354	97.171	7.8141	7.868	6.8488	6.7769
TSPAN5	NM_005723.2	4900168	4	99616396	-1.027	0.49073	-4.62	0.001564	0.566	7.87	88.948	0.353	97.159	8.4123	8.3572	7.3984	7.3168
SNORD72	NR_002583.1	2640754	5	40868540	-1.027	0.49073	-4.38	0.002154	0.566	3.7	2.86	0.368	97.476	4.331	4.0924	3.2889	3.0801
HTN1	NM_002159.2	6960202	4	70918818	-1.027	0.49073	-3.06	0.014842	0.587	3.3	0.085	0.527	99.242	4.2275	3.3958	3.0844	2.4849
TRIAP1	NM_016399.2	2600184	12	120881849	-1.025	0.49141	-4.57	0.001675	0.566	9.16	94.531	0.355	97.184	9.7037	9.6449	8.5756	8.7225
POSTN	NM_006475.1	1050747	13	37035506	-1.025	0.49141	-4.54	0.001728	0.566	3.51	0.548	0.355	97.201	4.0518	3.9886	2.9109	3.0801
DHRS9	NM_005771.3	4490079	2	169637369	-1.024	0.491751	-4.16	0.002939	0.566	3.7	2.841	0.383	97.749	4.2047	4.2132	2.9632	3.4058
KLF15	NM_014079.2	2570577	3	127544501	-1.023	0.492092	-4.62	0.001556	0.566	5.23	70.293	0.35	97.065	5.7164	5.7645	4.7223	4.7119
NPTN	NM_012428.2	430307	15	71639809	-1.023	0.492092	-4.47	0.001914	0.566	8.56	92.321	0.358	97.273	9.1374	9.01	8.1533	7.9484
RAB31	NM_006868.2	6590341	18	9852301	-1.023	0.492092	-4.26	0.002559	0.566	8.9	93.623	0.373	97.586	9.4375	9.3766	8.1948	8.5733
ERRFI1	NM_018948.2	7100639	1	7994689	-1.021	0.492775	-4.02	0.003552	0.566	10.86	98.166	0.39	97.891	11.2954	11.4522	10.1118	10.5936
LOC100132802	XM_001722593.1	430131	17	119723	-1.02	0.493116	-2.98	0.016819	0.587	5.72	74.896	0.535	99.274	5.7354	6.725	5.0175	5.4025
ZNF217	NM_006526.2	60672	20	52184280	-1.017	0.494143	-4.16	0.002938	0.566	6.31	79.389	0.374	97.618	6.6531	6.9919	5.9339	5.6781
NETO2	NM_018092.3	1580161	16	47115854	-1.016	0.494485	-3.2	0.011962	0.583	6.13	78.014	0.487	98.988	6.5549	6.7211	5.1669	6.077
FAM26A	NM_182494.1	6180450	10	105222692	-1.016	0.494485	-3.05	0.015225	0.587	5.3	71.011	0.517	99.176	5.3721	6.2362	4.5203	5.0553
C16orf82	NM_182831.1	1980100	16	26987808	-1.015	0.494828	-3.29	0.010475	0.576	3.85	8.071	0.47	98.863	4.6205	4.0924	2.9935	3.6903
CTSE	NM_001910.2	1770307	1	204495419	-1.014	0.495171	-3.41	0.008742	0.566	4.21	37.331	0.451	98.694	4.3082	5.1166	3.707	3.6903
CCND1	NM_053056.2	5820601	11	69178329	-1.013	0.495515	-4.12	0.003121	0.566	11.24	98.594	0.375	97.624	11.853	11.6498	10.5421	10.9339
ZFP41	NM_173832.3	2070484	8	144333171	-1.011	0.496202	-2.42	0.041038	0.618	3.58	1.023	0.689	99.723	4.0518	4.1119	2.3484	3.7931
HES1	NM_005524.2	1010528	3	193856060	-1.008	0.497235	-3.64	0.006175	0.566	6.1	77.824	0.415	98.279	6.3896	6.823	5.3393	5.8583
MAP4	NM_030884.2	6550608	3	47925602	-1.008	0.497235	-3.49	0.007803	0.566	3.68	2.399	0.434	98.516	4.3154	4.0458	3.5271	2.819
DCUN1D1	NM_020640.2	5220670	3	184144228	-1.006	0.497925	-4.35	0.002255	0.566	6.5	80.669	0.35	97.074	6.8988	7.1079	5.9071	6.088
	BQ181809	1230372			-1.006	0.497925	-2.01	0.078218	0.656	4.36	49.51	0.896	99.881	5.0619	4.6646	2.9632	4.7503
PTPN22	NM_015967.3	6560220	1	114158585	-1.004	0.498616	-3.22	0.011724	0.582	3.96	14.961	0.47	98.861	4.4956	4.4214	3.0071	3.9011
CDC2L6	NM_015076.3	3930452	6	111038242	-1.003	0.498961	-3.92	0.004118	0.566	7.14	84.752	0.381	97.726	7.6385	7.6501	6.3798	6.9031
LOC648469	XM_939565.1	2350039			-1.002	0.499307	-4.18	0.002848	0.566	3.98	16.771	0.358	97.262	4.5748	4.384	3.6398	3.3152
FAM46D	NM_152630.2	1820113	X	79586854	-0.999	0.500347	-3.31	0.010218	0.574	4.23	39.106	0.45	98.679	4.4679	4.9824	3.3958	4.0567
SERPINB11	NM_080475.1	4290482	18	59541420	-0.998	0.500694	-4.09	0.003219	0.566	4.3	45.548	0.361	97.328	4.9975	4.6093	3.729	3.8824
STX11	NM_003764.2	60470	6	144550749	-0.997	0.501041	-4.36	0.002205	0.566	4.91	66.615	0.341	96.873	5.5204	5.2966	4.4473	4.3749
RBP1	NM_002899.2	6650731	3	140719986	-0.995	0.501736	-4	0.003674	0.566	9.86	96.437	0.365	97.421	10.202	10.5192	9.1975	9.5345
SERPINB9	NM_004155.3	1230156	6	2833461	-0.993	0.502432	-4.49	0.001864	0.566	5.29	70.939	0.328	96.572	5.7979	5.7768	4.7943	4.7954
SCAND3	NM_052923.1	3710750	6	28647799	-0.993	0.502432	-4.44	0.001996	0.566	3.74	3.966	0.332	96.667	4.3082	4.1705	3.2605	3.232
KCNK10	NM_021161.3	2350088	14	87721278	-0.993	0.502432	-3.97	0.003843	0.566	3.91	11.577	0.367	97.451	4.413	4.3993	3.1746	3.6514
TGFB1I1	NM_015927.3	1820376	16	31396358	-0.992	0.50278	-3	0.016335	0.587	4.2	36.739	0.494	99.028	5.184	4.2047	3.8009	3.6047
	AI949799	3440300	13	48039838	-0.992	0.50278	-2.67	0.027602	0.609	3.8	5.886	0.575	99.458	3.8824	4.7123	3.7507	2.8597
ABCD4	NM_020326.2	1430301	14	73826155	-0.991	0.503129	-3.87	0.004402	0.566	4.05	23.038	0.373	97.576	4.331	4.7623	3.4083	3.7036
SH2B3	NM_005475.1	6560301	12	110373463	-0.989	0.503827	-3.55	0.007128	0.566	6.42	80.123	0.406	98.141	6.5749	7.2529	5.9945	5.8548
HNF4A	NM_178850.1	6370070	20	42486468	-0.989	0.503827	-2.85	0.020632	0.587	4.3	45.394	0.523	99.214	4.7628	4.8312	4.3505	3.2652
PION	NM_017439.3	2340301	7	76940687	-0.988	0.504176	-3.88	0.004374	0.566	3.68	2.378	0.37	97.51	3.9409	4.3993	3.0649	3.2992
NPTN	NM_017455.2	830553	15	71639488	-0.987	0.504526	-4.42	0.00203	0.566	9.82	96.324	0.327	96.517	10.3164	10.304	9.2658	9.3814
DNMT3A	NM_175630.1	1300592	2	25504645	-0.985	0.505226	-2.34	0.046013	0.62	3.7	2.973	0.676	99.693	4.2992	4.0924	2.4914	3.9306
HHLA3	NM_001036645.1	5270349	1	70593430	-0.984	0.505576	-3.74	0.005338	0.566	4.58	59.723	0.379	97.699	4.8238	5.3157	3.9322	4.2388
CDCP1	NM_178181.1	60215	3	45152240	-0.983	0.505927	-3.64	0.006169	0.566	6.21	78.645	0.388	97.849	6.5869	6.8198	5.4285	6.0125
TJP1	NM_175610.2	1010386	15	29993179	-0.982	0.506277	-4.31	0.002374	0.566	6.63	81.523	0.33	96.608	7.1609	7.0742	6.0319	6.2385
ADD2	NM_017483.2	6250193	2	70903969	-0.982	0.506277	-3.73	0.005455	0.566	4.11	28.998	0.378	97.679	4.4554	4.7554	3.8734	3.3734
AP2A1	NM_014203.2	5130019	19	50305793	-0.982	0.506277	-1.66	0.133393	0.697	4.41	52.499	1.148	99.951	3.8922	5.909	4.3915	3.4461
ACVR2A	NM_001616.3	4590349	2	148404569	-0.981	0.506628	-3.38	0.00912	0.566	6.06	77.468	0.418	98.336	6.3204	6.7787	5.2632	5.8742
UHRF1	NM_013282.3	1510278	19	4901898	-0.978	0.507683	-3.63	0.00634	0.566	5.09	68.95	0.385	97.794	5.7707	5.3966	4.8586	4.3522
ZCCHC12	NM_173798.2	2690279	X	117844643	-0.977	0.508035	-3.67	0.005903	0.566	7.47	86.716	0.379	97.696	8.0183	7.9031	6.688	7.2789
MRPL35	NM_016622.2	5340100	2	86293273	-0.976	0.508387	-4.07	0.003305	0.566	7.47	86.748	0.34	96.864	7.9271	7.9986	6.804	7.1707
	DA652386	3520053	2	51423257	-0.976	0.508387	-3.47	0.008035	0.566	4.21	37.844	0.402	98.088	4.3978	5.0026	3.5377	3.9099
HKDC1	NM_025130.2	870301	10	70697054	-0.975	0.50874	-4.31	0.002376	0.566	4.41	52.756	0.323	96.392	4.85	4.9528	3.8452	4.0082
LOC100129571	XM_001715275.1	2490326	5	65928244	-0.974	0.509093	-3.74	0.005359	0.566	4.63	61.091	0.369	97.5	4.8435	5.3845	4.2145	4.0646
LOC653412	XM_927305.1	1090164	5	70549791	-0.974	0.509093	-3.42	0.008615	0.566	4.09	26.768	0.405	98.124	4.7164	4.4391	3.9417	3.2652
LOC649553	XR_038252.1	1980239	7	64168295	-0.973	0.509446	-3.96	0.003894	0.566	10.65	97.862	0.347	97.015	10.9358	11.3308	10.0682	10.2528
ITGB5	NM_002213.3	2490411	3	125964752	-0.972	0.509799	-4.13	0.003038	0.566	8.75	93.113	0.332	96.672	9.2653	9.2041	8.1035	8.4223
TAGLN2	NM_003564.1	2340180	1	159888402	-0.971	0.510152	-4.11	0.003134	0.566	6.3	79.325	0.333	96.691	6.7078	6.8704	5.9655	5.6715
SPATA21	NM_198546.1	1740575	1	16725924	-0.97	0.510506	-2.97	0.01719	0.587	3.7	2.96	0.474	98.888	4.0782	4.2979	3.6949	2.7403
CD48	NM_001778.2	2030767	1	160648718	-0.97	0.510506	-2.58	0.031574	0.609	3.5	0.527	0.569	99.428	4.0157	3.9503	3.6302	2.3953
PNLIPRP3	NM_001011709.1	1740112	10	118227276	-0.969	0.51086	-3.85	0.004591	0.566	3.63	1.607	0.354	97.165	4.1963	4.0266	2.9109	3.3734
	AF131784	7040682	18	50713547	-0.969	0.51086	-3.66	0.006051	0.566	5.77	75.226	0.372	97.557	6.0547	6.4468	5.0583	5.5051
PLEKHA6	NM_014935.2	4290017	1	204188094	-0.969	0.51086	-3.38	0.009188	0.566	5.19	69.91	0.405	98.122	5.5242	5.8272	5.0465	4.3668
MGC4677	NM_052871.3	6350189	2	87602016	-0.968	0.511214	-3.83	0.004688	0.566	9.2	94.656	0.354	97.176	9.5401	9.8183	8.5043	8.9176
AQP11	NM_173039.1	780594	11	76998148	-0.967	0.511569	-3.63	0.006335	0.566	5.01	67.991	0.373	97.588	5.4879	5.4973	4.829	4.2216
MIR192	NR_029578.1	70133			-0.965	0.512278	-1.99	0.080222	0.657	3.51	0.58	0.824	99.835	3.7863	4.2047	2.1785	3.8824
	BC041923	1050100	19	49096921	-0.964	0.512634	-3.52	0.007393	0.566	3.46	0.387	0.382	97.747	4.1375	3.7526	2.7141	3.2472
XKRX	NM_212559.1	4010356	X	100055351	-0.964	0.512634	-3.26	0.011039	0.579	4.63	61.182	0.417	98.323	5.0619	5.1623	4.5455	3.7499
LOC644479	XM_927610.1	3140129	6	92858759	-0.963	0.512989	-2.2	0.058025	0.627	3.43	0.299	0.705	99.737	3.8824	3.9409	3.7181	2.1785
KPNA4	NM_002268.3	2850128	3	161700944	-0.962	0.513345	-4.15	0.002961	0.566	8.85	93.466	0.322	96.35	9.2983	9.372	8.2374	8.5089
MGAT4C	NM_013244.2	70437	12	84896680	-0.962	0.513345	-3.72	0.005477	0.566	3.71	3.138	0.358	97.248	4.3838	3.9985	3.4207	3.0377
PLEKHA1	NM_001001974.1	6650324	10	124180729	-0.961	0.513701	-4.32	0.002342	0.566	8.59	92.431	0.31	95.903	9.0984	9.0448	8.0673	8.1532
LHX2	NM_004789.3	5550142	9	125834947	-0.961	0.513701	-4.2	0.002787	0.566	7.93	89.304	0.317	96.223	8.2935	8.5316	7.4317	7.4722
FAM167A	NM_053279.2	2320615	8	11279219	-0.961	0.513701	-4.15	0.002988	0.566	5.73	74.957	0.321	96.333	6.2014	6.2142	5.1057	5.3881
GZMH	NM_033423.3	2370010	14	25075771	-0.96	0.514057	-1.59	0.14895	0.708	3.61	1.38	1.179	99.953	3.9409	4.2395	1.9963	4.2634
YRDC	NM_024640.3	3440224	1	38268850	-0.959	0.514413	-4.24	0.002601	0.566	9.68	96.013	0.312	95.979	10.1138	10.2027	9.1179	9.2816
LOC100130467	XM_001726493.1	1770682	14	100076292	-0.958	0.51477	-4.32	0.002339	0.566	3.77	4.643	0.307	95.785	4.2275	4.2647	3.2605	3.3152
RBM47	NM_019027.3	2320576	4	40426007	-0.957	0.515127	-4.3	0.002393	0.566	6.87	83.039	0.307	95.799	7.3913	7.3027	6.3737	6.4059
PTP4A3	NM_032611.1	4480286	8	142432193	-0.956	0.515484	-4.21	0.002717	0.566	5.25	70.494	0.312	95.965	5.6539	5.8022	4.701	4.8435
AADACL1	NM_020792.3	7650020	3	173831679	-0.956	0.515484	-3.7	0.00567	0.566	6.17	78.357	0.354	97.167	6.4423	6.8622	5.5241	5.8686
AXIN2	NM_004655.2	1070189	17	60955365	-0.955	0.515842	-3.1	0.014119	0.587	7.32	85.806	0.431	98.486	7.913	7.6739	6.4183	7.2594
ZNF350	NM_021632.3	1240286	19	57160019	-0.955	0.515842	-2.59	0.031173	0.609	3.55	0.807	0.545	99.318	3.9116	4.1464	3.6629	2.4849
LOC649260	XM_938322.1	770348			-0.952	0.516915	-4.12	0.003117	0.566	4.66	62.033	0.315	96.111	5.2176	5.0562	4.0717	4.2972
OR10G8	NM_001004464.1	2650309	11	123406319	-0.952	0.516915	-3.16	0.01285	0.587	3.6	1.198	0.419	98.342	4.3154	3.8292	3.4594	2.7804
DDX11	NM_030653.3	380209	12	31146056	-0.95	0.517632	-4.27	0.002501	0.566	4.19	36.209	0.302	95.592	4.7101	4.6233	3.707	3.7273
PTCH1	NM_001083605.1	1410289	9	98206680	-0.95	0.517632	-3.54	0.007223	0.566	3.78	5.126	0.365	97.406	4.4484	4.0646	3.5501	3.0628
JAZF1	NM_175061.3	3520463	7	27871165	-0.95	0.517632	-3.28	0.010622	0.577	5.61	73.932	0.397	98.012	6.1052	6.0565	4.751	5.5103
ZNF185	NM_007150.2	6840674	X	151892370	-0.949	0.517991	-3.72	0.005506	0.566	6.25	78.908	0.345	96.962	6.5089	6.934	5.6249	5.9199
LOC728070	XM_001128758.1	6290458	16	42233	-0.947	0.51871	-4.07	0.003338	0.566	4.04	21.672	0.314	96.053	4.6576	4.3604	3.5633	3.5603
DEPDC1B	NM_018369.1	7330338	5	59935142	-0.947	0.51871	-2.58	0.031556	0.609	6.15	78.156	0.535	99.276	6.6391	6.6098	5.0823	6.2727
LOC728241	XM_001128352.1	50471			-0.945	0.51943	-3.85	0.004538	0.566	4.21	37.513	0.328	96.57	4.6892	4.6716	3.9509	3.5207
ADD3	NM_001121.2	3420747	10	111869015	-0.945	0.51943	-3.73	0.005425	0.566	5.31	71.121	0.339	96.835	5.7063	5.8507	4.5937	5.0742
LOC285943	XR_040114.1	460768	7	27212746	-0.945	0.51943	-2.7	0.026361	0.609	4.76	64.17	0.502	99.096	5.0813	5.3772	3.7507	4.8175
RRAD	NM_004165.1	7200639	16	65513576	-0.944	0.51979	-3.75	0.005286	0.566	3.72	3.356	0.337	96.79	4.1025	4.2808	3.4761	3.0192
TCEA1	NM_201437.1	110427	8	55054168	-0.944	0.51979	-3.56	0.007024	0.566	7.57	87.326	0.356	97.222	7.9387	8.1473	6.8198	7.379
EDN3	NM_207032.1	1410240	20	57333984	-0.943	0.52015	-2.5	0.03621	0.609	3.54	0.703	0.556	99.367	3.8922	4.121	2.4503	3.6767
BCOR	NM_017745.4	510576	X	39795901	-0.942	0.520511	-4	0.003684	0.566	6.6	81.358	0.314	96.045	7.1645	6.9797	6.267	5.9939
MAP3K7IP3	NM_152787.3	1340601	X	30848643	-0.942	0.520511	-2.68	0.027192	0.609	3.72	3.436	0.502	99.102	4.3978	3.9886	2.7334	3.7694
LOC728117	XM_001126583.1	1710543	21	45878811	-0.941	0.520872	-4	0.003667	0.566	4.11	28.134	0.313	95.998	4.7303	4.4214	3.6855	3.5846
OTUD1	XM_001134465.1	7200561			-0.94	0.521233	-4.09	0.003226	0.566	5.05	68.47	0.305	95.704	5.507	5.5316	4.4544	4.7051
MIR490	NR_030165.1	3990402			-0.94	0.521233	-3.13	0.013408	0.587	3.93	13.203	0.409	98.198	4.0157	4.7896	3.6094	3.3152
LOC651386	XM_001131678.1	6770400	13	26030365	-0.938	0.521956	-4.15	0.002981	0.566	3.77	4.804	0.3	95.501	4.285	4.1963	3.2167	3.3885
ALPL	NM_000478.3	6100356	1	21777338	-0.937	0.522318	-4	0.003664	0.566	5.4	71.993	0.309	95.871	6.0166	5.7138	4.9678	4.8888
HOXA10	NM_018951.3	510097	7	27210506	-0.936	0.52268	-4.22	0.002711	0.566	8.42	91.726	0.293	95.196	8.8948	8.8875	7.9939	7.9173
P2RY2	NM_002564.2	4150408	11	72624553	-0.936	0.52268	-4.18	0.002829	0.566	5.8	75.499	0.295	95.325	6.3352	6.202	5.3494	5.3155
LRRC55	NM_001005210.1	4120672	11	56713801	-0.936	0.52268	-4.1	0.003201	0.566	3.95	14.131	0.301	95.56	4.4056	4.4214	3.3618	3.5937
SNORA42	NR_002974.1	6960438	1	155889727	-0.936	0.52268	-4.09	0.003221	0.566	5.26	70.619	0.301	95.571	5.8407	5.6169	4.7556	4.8308
OR52E2	NM_001005164.1	1470044	11	5080017	-0.936	0.52268	-3.33	0.009907	0.568	4.03	21.139	0.375	97.633	4.8162	4.1785	3.4083	3.7146
MRPL35	NM_016622.2	6760022	2	86292835	-0.935	0.523042	-4.15	0.002976	0.566	6.68	81.876	0.297	95.387	7.0668	7.2372	6.2432	6.1902
LOC100130216	XM_001713696.1	5960601			-0.935	0.523042	-3.89	0.004315	0.566	4.02	19.966	0.316	96.138	4.6453	4.3214	3.4461	3.6514
LOC646452	XM_929379.1	2490327	13	24613680	-0.935	0.523042	-2.76	0.02395	0.602	3.89	10.453	0.474	98.893	3.9116	4.8081	3.6949	3.1541
GNG10	NM_001017998.2	450348	9	113463766	-0.934	0.523405	-3.6	0.006589	0.566	8.8	93.25	0.341	96.883	9.0424	9.4876	8.1683	8.4945
FXYD7	NM_022006.1	6380110	19	35645091	-0.932	0.524131	-3.5	0.007656	0.566	4.23	39.389	0.35	97.08	4.6074	4.7818	4.0521	3.4737
FAM69B	XM_001130258.1	3450114			-0.931	0.524495	-4.06	0.003361	0.566	7.85	88.846	0.299	95.482	8.32	8.3163	7.5096	7.2644
HSPB8	NM_014365.2	6180259	12	118116751	-0.931	0.524495	-3.29	0.010464	0.576	3.73	3.489	0.375	97.629	4.2683	4.1119	3.6094	2.9085
AASDHPPT	NM_015423.2	7040717	11	105474164	-0.931	0.524495	-3.16	0.01279	0.585	9.25	94.825	0.394	97.95	9.6322	9.8018	8.3981	9.1729
DEFB104A	NM_080389.1	7320156	8	7320010	-0.931	0.524495	-2.53	0.034551	0.609	3.9	10.845	0.53	99.253	4.9528	3.7748	3.5501	3.3152
SF3B1	NM_012433.2	5310048	2	198285785	-0.93	0.524858	-4.14	0.00302	0.566	7.09	84.406	0.293	95.213	7.4804	7.6357	6.6562	6.5989
LOC643293	XM_931499.1	70193	X	148864761	-0.93	0.524858	-2.18	0.060098	0.633	3.79	5.486	0.658	99.642	4.2752	4.2395	4.0717	2.5827
MED10	NM_032286.2	5720056	5	6425370	-0.929	0.525222	-4.03	0.003501	0.566	8.32	91.245	0.299	95.456	8.8444	8.7283	7.7413	7.9742
LOC400793	XM_930558.1	5090142	1	160615284	-0.925	0.526681	-3.45	0.008259	0.566	3.92	12.67	0.349	97.059	4.5019	4.2733	3.1746	3.7499
LOC642154	XM_936305.1	5900086			-0.924	0.527046	-3.8	0.004905	0.566	4.43	53.429	0.313	96.028	4.8777	4.9012	3.7588	4.1711
C20orf7	NM_199052.1	2640398	20	13743100	-0.924	0.527046	-3.13	0.013453	0.587	3.53	0.65	0.39	97.885	4.0605	3.9211	3.4594	2.6751
VTRNA1-1	NR_026703.1	4220255	5	140090892	-0.923	0.527411	-4.09	0.003212	0.566	4.88	66.2	0.289	95.046	5.4194	5.2616	4.3778	4.4576
	BX104914	3460338	14	87671986	-0.923	0.527411	-3.76	0.005206	0.566	3.98	16.542	0.315	96.119	4.4679	4.4062	3.729	3.2992
PCDHA2	NM_018905.2	6760136	5	140157043	-0.923	0.527411	-3.48	0.007828	0.566	3.37	0.163	0.343	96.915	3.6145	4.0458	2.7034	3.1112
PJA1	NM_145119.2	6480736	X	68383007	-0.923	0.527411	-3.17	0.012611	0.584	4.15	32.498	0.383	97.764	4.5866	4.6377	3.3039	4.0739
LRRC58	NM_001099678.1	1690161	3	121526807	-0.92	0.528509	-4.12	0.003093	0.566	7.46	86.649	0.285	94.83	7.9537	7.8868	7.0523	6.9484
TTLL7	NM_024686.4	2570307	1	84348746	-0.92	0.528509	-4.03	0.003535	0.566	5.49	72.844	0.291	95.13	5.9377	5.961	5.1457	4.9125
VRK1	NM_003384.2	2600739	14	96412169	-0.92	0.528509	-3.83	0.004682	0.566	7.8	88.546	0.307	95.78	8.1058	8.4143	7.227	7.4522
C4orf32	NM_152400.1	290368	4	113329352	-0.92	0.528509	-3.81	0.004828	0.566	4.42	53.113	0.308	95.831	4.9249	4.837	4.153	3.7694
IL8	NM_000584.2	1980309	4	74609125	-0.919	0.528875	-3.23	0.011497	0.581	6.07	77.532	0.37	97.527	6.1603	6.888	5.6296	5.5802
HIF1A	NM_181054.1	2680722	14	61284383	-0.918	0.529242	-3.57	0.006901	0.566	6.94	83.515	0.328	96.562	7.1484	7.6537	6.3969	6.5702
LOC729973	XM_001131929.1	4850360	1	27847615	-0.918	0.529242	-3.52	0.007366	0.566	4.22	39.074	0.333	96.697	4.5792	4.7896	4.026	3.5071
LOC643951	XM_927208.1	290626	19	40415462	-0.917	0.529609	-3.69	0.005804	0.566	4.11	28.447	0.317	96.183	4.7823	4.3527	3.7399	3.5603
PHYHIP	NM_014759.2	1400343	8	22133316	-0.917	0.529609	-3.22	0.011668	0.581	4.08	25.723	0.369	97.493	4.8719	4.2047	3.7694	3.4737
LOC644299	XM_932110.1	1340672	9	67793504	-0.917	0.529609	-2.03	0.075055	0.655	3.78	5.179	0.705	99.74	3.9211	4.5618	2.5931	4.0567
LOC732435	XM_001718358.1	20372			-0.916	0.529976	-2.78	0.023099	0.599	3.92	11.99	0.444	98.609	4.3154	4.4296	2.9632	3.9503
ZNF468	NM_199132.1	3930010	19	58034064	-0.916	0.529976	-2.07	0.070693	0.65	3.72	3.428	0.683	99.714	4.0864	4.2733	2.4914	4.037
GAN	NM_022041.3	460600	16	81413406	-0.915	0.530344	-4.12	0.00309	0.566	5.46	72.575	0.28	94.576	5.8857	5.945	4.9782	5.0232
ANKRD46	NM_198401.2	2750598	8	101602463	-0.914	0.530712	-4.06	0.00338	0.566	7.66	87.87	0.284	94.783	8.0347	8.2076	7.1974	7.2166
ANXA2	NM_001002857.1	770730	15	60689458	-0.914	0.530712	-4.01	0.003635	0.566	9.23	94.77	0.287	94.923	9.7261	9.6542	8.6687	8.8837
SKP1	NM_006930.3	2940369	5	133492119	-0.914	0.530712	-3.76	0.005184	0.566	7.16	84.826	0.307	95.772	7.7774	7.4472	6.5763	6.8198
CYR61	NM_001554.3	3930605	1	85821467	-0.913	0.53108	-3.95	0.003973	0.566	7.88	89.003	0.291	95.113	8.4011	8.2735	7.3005	7.5476
	AI702254	4860082			-0.913	0.53108	-2.14	0.063142	0.637	3.96	15.471	0.643	99.61	4.3838	4.4544	4.2458	2.7667
KBTBD2	NM_015483.1	4920372	7	32874399	-0.912	0.531448	-3.94	0.003979	0.566	8.34	91.323	0.29	95.063	8.7717	8.817	7.7477	8.0176
BNIPL	NM_138279.1	7380196	1	149284018	-0.911	0.531816	-3.71	0.005622	0.566	4.06	23.756	0.308	95.861	4.6074	4.4214	3.8009	3.4058
MIR1286	NR_031618.1	2450376			-0.911	0.531816	-2.9	0.019266	0.587	4.12	29.053	0.415	98.291	4.6711	4.47	4.1036	3.2152
GTF2A1	NM_201595.1	5910133	14	81651941	-0.91	0.532185	-3.45	0.008178	0.566	4.43	53.685	0.333	96.693	5.1737	4.6019	4.0349	3.9203
CYP11B1	NM_001026213.1	4220398	8	143955288	-0.91	0.532185	-3.37	0.009332	0.566	4.19	36.12	0.343	96.922	4.8777	4.414	3.9509	3.5207
NCBP2	NM_007362.3	5910189	3	198148286	-0.908	0.532923	-4.05	0.003404	0.566	7.01	83.941	0.278	94.493	7.5343	7.4032	6.5335	6.5888
	BG221551	1990634	14	46023353	-0.907	0.533293	-4.1	0.003174	0.566	3.76	4.518	0.274	94.296	4.2207	4.2132	3.3039	3.3152
LOC647946	XM_943582.1	160707			-0.907	0.533293	-3.74	0.005364	0.566	4.08	26.186	0.301	95.581	4.5866	4.4899	3.435	3.8283
SNORA59B	NR_003022.1	6980594	17	19401465	-0.907	0.533293	-3.45	0.008262	0.566	4.7	62.988	0.33	96.604	5.432	4.8731	4.1698	4.3221
LRMP	NM_006152.2	7150324	12	25152225	-0.904	0.534403	-1.54	0.161012	0.718	3.65	1.865	1.091	99.943	4.4208	3.7748	4.2534	2.1336
MIR1277	NR_031685.1	4810411			-0.903	0.534774	-3.28	0.010583	0.576	4.43	53.694	0.346	96.977	5.1737	4.595	4.1453	3.8173
TMEM87A	NM_015497.2	7150196	15	40290188	-0.902	0.535144	-4.03	0.003541	0.566	9.58	95.742	0.275	94.326	10.0379	10.0199	9.0541	9.1996
BCAR3	NM_003567.2	4070053	1	94027798	-0.902	0.535144	-3.97	0.003855	0.566	7.81	88.603	0.279	94.512	8.1664	8.3585	7.314	7.4077
THBS1	NM_003246.2	5810685	15	37676117	-0.902	0.535144	-3.8	0.004913	0.566	5.26	70.64	0.292	95.145	5.5457	5.8805	4.8649	4.7576
ATRX	NM_138271.1	7550187	X	76833023	-0.902	0.535144	-3.79	0.00498	0.566	3.78	5.202	0.293	95.192	4.4056	4.0646	3.2776	3.3885
LOC643660	XM_926964.1	4480240	10	46571565	-0.902	0.535144	-3.08	0.014399	0.587	3.88	9.574	0.372	97.569	4.5414	4.1119	3.0996	3.7499
PMP22	NM_153321.1	7560138	17	15133244	-0.9	0.535887	-3.82	0.004771	0.566	9.24	94.8	0.289	95.008	9.8208	9.5698	8.9041	8.6861
CLDN3	NM_001306.2	20546	7	72821281	-0.9	0.535887	-3.8	0.004932	0.566	5.71	74.845	0.29	95.103	6.1784	6.1518	5.091	5.4387
MYO5B	NM_001080467.1	1440014	18	45603353	-0.9	0.535887	-3.62	0.006437	0.566	5.78	75.372	0.306	95.734	6.2441	6.2165	5.5626	5.0988
ZNF644	NM_016620.2	430458	1	91486831	-0.899	0.536258	-4.06	0.003386	0.566	4.41	52.22	0.27	93.998	4.8275	4.8808	3.9509	3.9596
	XM_087762	2900431			-0.899	0.536258	-3.81	0.004834	0.566	4.35	48.89	0.288	94.978	4.9639	4.6377	3.8635	3.94
HTN3	NM_000200.1	6450091	4	70933543	-0.898	0.53663	-3.71	0.005635	0.566	4.25	41.596	0.296	95.355	4.724	4.6836	4.0067	3.6047
ITIH3	NM_002217.3	6560678	3	52817787	-0.898	0.53663	-3.66	0.006056	0.566	3.94	13.531	0.3	95.52	4.5414	4.2305	3.3369	3.6398
	BX112120	4590379	X	55528084	-0.898	0.53663	-2.77	0.023646	0.601	4.39	51.166	0.425	98.412	5.1982	4.4759	4.2614	3.616
POLR3G	NM_006467.2	6450274	5	89770811	-0.897	0.537002	-4	0.003654	0.566	5.76	75.19	0.272	94.139	6.17	6.247	5.3746	5.2476
TOR1B	NM_014506.1	6180056	9	131613002	-0.895	0.537747	-3.64	0.006237	0.566	6.3	79.297	0.299	95.499	6.962	6.5349	5.9071	5.7993
	BM932132	7100358	17_random	677592	-0.895	0.537747	-3.45	0.008245	0.566	3.99	17.389	0.318	96.257	4.2433	4.6233	3.3369	3.7391
DPYSL5	NM_020134.2	3520332	2	27024294	-0.895	0.537747	-2.56	0.032695	0.609	4.19	35.845	0.47	98.857	4.1025	5.1679	3.5975	3.8824
PLEKHA1	NM_021622.3	3930541	10	124172520	-0.894	0.53812	-4.03	0.003514	0.566	8.32	91.23	0.267	93.856	8.7339	8.7992	7.8877	7.8567
BCOR	NM_020926.2	6760273	X	39816360	-0.894	0.53812	-3.71	0.005612	0.566	5.72	74.919	0.292	95.143	6.3429	5.9981	5.1851	5.3683
LOC100134157	XM_001724318.1	5050332			-0.894	0.53812	-3.23	0.011423	0.581	3.88	9.75	0.343	96.928	4.3082	4.3446	3.7694	3.0943
CR1	NM_000651.4	3940356	1	205859986	-0.894	0.53812	-3.09	0.01433	0.587	3.66	2.145	0.363	97.381	4.3387	3.8816	2.9109	3.5207
GRRP1	NM_024869.2	1710270	1	26361510	-0.893	0.538493	-3.83	0.004715	0.566	5.16	69.63	0.281	94.662	5.5609	5.6533	4.8586	4.5693
SUSD2	NM_019601.3	110592	22	22915000	-0.893	0.538493	-3.72	0.005515	0.566	5.25	70.511	0.29	95.092	5.6562	5.7392	4.6185	4.9904
SLC45A1	NM_001080397.1	1230678	1	8326734	-0.89	0.539614	-3.92	0.004146	0.566	6.59	81.26	0.272	94.133	6.9263	7.1384	6.1233	6.1606
SDC4P	NR_001580.1	6290040	22	30877507	-0.89	0.539614	-3.41	0.008698	0.566	3.62	1.469	0.316	96.17	4.1638	3.9604	2.9109	3.4341
LOC642420	XM_930795.1	5050309	6	97391970	-0.889	0.539988	-3.29	0.010436	0.576	4.07	25.094	0.329	96.589	4.6515	4.384	3.914	3.344
LOC651006	XM_942564.1	6560538			-0.889	0.539988	-3.29	0.010545	0.576	4.27	42.855	0.33	96.61	4.6262	4.801	4.1293	3.5207
RPS4Y2	NM_001039567.2	6020273	Y	21340111	-0.888	0.540363	-3.92	0.004125	0.566	4.13	30.3	0.269	93.976	4.6453	4.4972	3.7507	3.616
SMPDL3A	NM_006714.2	4230669	6	123171997	-0.886	0.541112	-3.86	0.004476	0.566	5.46	72.639	0.272	94.103	5.9792	5.8345	4.9218	5.1208
FXYD3	NM_021910.1	5390240	19	40301943	-0.886	0.541112	-2.65	0.028235	0.609	3.56	0.91	0.435	98.531	4.0349	3.9802	3.6302	2.6124
LOC644003	XM_927256.1	2030010	4	7534991	-0.886	0.541112	-2.48	0.03715	0.61	3.69	2.803	0.479	98.924	3.9787	4.2979	3.8009	2.7042
C14orf139	XR_040801.1	5290767	14	94945274	-0.885	0.541488	-2.79	0.02269	0.598	3.84	7.804	0.403	98.099	4.2508	4.3214	2.9409	3.862
LOC645676	XM_935153.1	3180221	1	153798674	-0.884	0.541863	-2.78	0.023178	0.599	3.88	9.949	0.405	98.111	4.5208	4.1293	3.8635	3.0192
LOC441205	XM_499062.2	5890128	7	26572808	-0.884	0.541863	-2.72	0.025536	0.607	3.67	2.299	0.418	98.338	4.1557	4.0732	2.7459	3.7146
CALHM3	NM_001129742.1	5720463	10	105232797	-0.883	0.542239	-3.48	0.007924	0.566	4.92	66.759	0.303	95.624	5.1528	5.5666	4.3293	4.6248
IFNAR1	NM_000629.2	7550181	21	33653639	-0.882	0.542615	-3.96	0.003871	0.566	6.62	81.463	0.261	93.489	7.1078	7.0053	6.1705	6.1781
LOC646917	XM_934050.1	2120424	1	96260759	-0.882	0.542615	-3.95	0.00395	0.566	4.2	36.94	0.262	93.557	4.5792	4.7051	3.7507	3.7694
TMEM189	NM_199129.1	4050072	20	48173748	-0.882	0.542615	-3.83	0.004684	0.566	7.63	87.707	0.271	94.078	8.0301	8.1213	7.0709	7.3158
LOC100128163	XM_001722350.1	6040576	18	54488312	-0.882	0.542615	-3.21	0.011864	0.582	5.36	71.688	0.333	96.701	5.7096	5.8958	4.601	5.2395
C13orf1	NM_020456.1	4010554	13	49385160	-0.881	0.542991	-3.45	0.008235	0.566	5.86	75.897	0.303	95.653	6.2164	6.3735	5.1669	5.6617
LOC649189	XM_943611.1	4540524			-0.881	0.542991	-3.36	0.00944	0.566	4.39	51.25	0.314	96.058	4.6136	5.0468	4.1375	3.7605
	AK056736	4220059	X	21812927	-0.881	0.542991	-3.13	0.013349	0.587	6.82	82.759	0.342	96.909	6.997	7.5227	6.1415	6.6156
NEK6	NM_014397.3	5860463	9	126154389	-0.88	0.543367	-3.8	0.004909	0.566	6.53	80.858	0.271	94.101	6.9727	6.9677	6.2306	5.9495
	AA399242	5310546	3	55180293	-0.88	0.543367	-3.7	0.005686	0.566	3.75	4.182	0.279	94.552	4.2132	4.1705	3.4891	3.1349
WDR89	NM_001008726.1	150440	14	64108075	-0.88	0.543367	-3.45	0.008183	0.566	4.13	31.058	0.302	95.609	4.751	4.3993	3.8833	3.5071
TNFRSF6B	NM_003823.2	2640392	20	61798486	-0.879	0.543744	-3.91	0.004165	0.566	4.78	64.636	0.262	93.525	5.2261	5.2144	4.2614	4.4214
OR4F21	NM_001005504.1	2120358	8	116476	-0.879	0.543744	-3.49	0.007748	0.566	3.98	16.836	0.298	95.425	4.4679	4.3696	3.78	3.2992
IL1RAP	NM_002182.2	4880632	3	191851688	-0.879	0.543744	-3.24	0.011382	0.581	4.75	64.053	0.326	96.492	5.2872	5.0954	4.0067	4.6185
LOC652147	XM_941485.1	130546			-0.878	0.544121	-3.4	0.008867	0.566	3.72	3.284	0.306	95.755	4.2752	4.0355	3.0332	3.5207
LOC100127982	XR_039012.1	870279			-0.877	0.544499	-3.66	0.006044	0.566	4.26	42.301	0.28	94.607	4.7436	4.6589	3.6398	4.0082
LOC441167	XR_040136.1	2850561			-0.874	0.545632	-3.46	0.008077	0.566	3.88	9.763	0.296	95.346	4.0864	4.5465	3.35	3.5344
RTKN	NM_033046.2	6100382	2	74653082	-0.874	0.545632	-3.35	0.009529	0.567	9.45	95.376	0.308	95.827	9.7281	10.0391	8.7747	9.2436
ACAP2	NM_012287.4	4280026	3	194996609	-0.873	0.54601	-3.55	0.00707	0.566	5.88	76.105	0.286	94.866	6.1628	6.4744	5.2933	5.5984
	CK825060	6940110	3	185725055	-0.873	0.54601	-3.05	0.01523	0.587	4	18.488	0.345	96.97	4.2683	4.6019	3.893	3.232
FBLN1	NM_006487.2	430088	22	44332766	-0.873	0.54601	-2.88	0.01965	0.587	3.63	1.579	0.372	97.567	4.1638	3.9604	3.5975	2.7804
ADM	NM_001124.1	5670465	11	10285345	-0.872	0.546389	-3.7	0.005644	0.566	7.82	88.643	0.271	94.089	8.4177	8.0906	7.3915	7.3734
BMPER	NM_133468.2	4780082	7	34161772	-0.871	0.546768	-2.63	0.029335	0.609	3.61	1.395	0.422	98.38	4.3082	3.7853	2.7459	3.6047
ANTXR1	NM_018153.2	60255	2	69226712	-0.87	0.547147	-3.92	0.004146	0.566	5.65	74.316	0.253	92.99	6.1052	6.0659	5.2525	5.1793
	AK095707	3460020	16	79981590	-0.87	0.547147	-3.91	0.004155	0.566	6.94	83.479	0.254	93.03	7.3262	7.4192	6.4995	6.5053
LOC654256	XM_942353.1	3290653			-0.87	0.547147	-2.26	0.052969	0.623	4.06	23.442	0.527	99.246	4.7164	4.2647	4.2228	3.0192
NFIX	NM_002501.2	5720129	19	13070426	-0.869	0.547526	-3.92	0.004134	0.566	6.94	83.498	0.253	92.95	7.342	7.4089	6.5178	6.495
TSPAN18	NM_130783.3	1820279	11	44909223	-0.869	0.547526	-3.13	0.013432	0.587	5.61	73.941	0.329	96.593	5.8918	6.1904	4.8649	5.4798
CHMP6	NM_024591.3	5690520	17	76580319	-0.869	0.547526	-2.97	0.01713	0.587	4.71	63.2	0.352	97.127	5.4563	4.8312	4.0437	4.5068
IGF2	NM_001007139.3	3420682	11	2113287	-0.869	0.547526	-2.91	0.018829	0.587	3.62	1.497	0.363	97.362	4.2596	3.8485	3.5377	2.8326
KRTAP4-11	NM_033059.2	2100392	17	10072	-0.869	0.547526	-2.61	0.030295	0.609	3.8	5.642	0.423	98.397	4.3154	4.1464	2.8616	3.862
TMEM173	NM_198282.1	3460008	5	138855576	-0.868	0.547906	-3.15	0.01308	0.587	5.93	76.522	0.326	96.509	6.2888	6.4423	5.1705	5.8245
CEP97	NM_024548.2	7400575	3	101485886	-0.867	0.548286	-3.34	0.009794	0.567	3.9	10.705	0.302	95.598	4.5208	4.1375	3.2605	3.6638
DLC1	NM_024767.2	1190446	8	13116451	-0.866	0.548666	-3.9	0.004233	0.566	3.66	2.056	0.251	92.867	4.1025	4.0817	3.1864	3.2652
DEPDC1B	NM_018369.1	2370441	5	59928585	-0.866	0.548666	-3.79	0.005007	0.566	7.76	88.372	0.259	93.394	8.3163	8.0784	7.3264	7.3364
ROPN1	NM_017578.2	5420739	3	125171656	-0.866	0.548666	-3.57	0.006925	0.566	3.62	1.457	0.278	94.472	4.2275	3.8703	3.0844	3.2818
LOC653193	XM_926448.1	7210747	4	75695488	-0.866	0.548666	-3.54	0.007249	0.566	3.78	5.122	0.281	94.643	4.2508	4.1785	3.1361	3.5603
LOC652456	XM_941905.1	110022			-0.866	0.548666	-2.95	0.017607	0.587	4.62	60.833	0.352	97.129	4.7436	5.3568	4.4281	3.94
KLF11	XM_001129527.1	5700088			-0.865	0.549046	-3.63	0.006317	0.566	6.15	78.141	0.271	94.093	6.4004	6.7624	5.7042	5.7287
C1orf204	NM_001134233.1	3390025	1	159804420	-0.865	0.549046	-3.37	0.009277	0.566	4.7	63.029	0.296	95.359	5.3335	4.9325	4.0945	4.4412
	BC035081	4890324	1	89834526	-0.865	0.549046	-2.91	0.018934	0.587	7.79	88.472	0.359	97.29	8.2644	8.1781	6.9525	7.7591
TRPS1	NM_014112.2	6450484	8	116493702	-0.865	0.549046	-2.19	0.05859	0.629	4.36	49.429	0.545	99.32	4.7702	4.8129	3.2605	4.5917
GPBAR1	NM_001077191.1	5560079	2	218836765	-0.865	0.549046	-2.06	0.07184	0.652	4.12	29.671	0.6	99.524	4.2132	4.8943	3.0481	4.3293
GPR137C	NM_001099652.1	2640300	14	52173780	-0.864	0.549427	-3.74	0.005337	0.566	4.85	65.762	0.261	93.466	5.3412	5.2224	4.5389	4.2972
C1orf41	NM_016126.1	6450273	1	54178340	-0.864	0.549427	-3.21	0.011848	0.582	8.3	91.156	0.314	96.037	8.8289	8.6356	7.5718	8.1651
NAMPT	NM_005746.2	3060523	7	105925277	-0.864	0.549427	-2.98	0.016799	0.587	5.9	76.253	0.346	96.983	6.2557	6.4074	5.0939	5.8403
	BM986869	430246			-0.864	0.549427	-2.86	0.020355	0.587	4.85	65.726	0.366	97.436	5.6721	4.888	4.2683	4.5632
ORAI2	NM_032831.1	6400113	7	101875595	-0.864	0.549427	-2.13	0.064485	0.64	4.13	30.632	0.569	99.426	4.5932	4.5332	3.0071	4.3903
ZNF364	NM_014455.1	7380382	1	144399891	-0.863	0.549808	-3.86	0.00451	0.566	7.43	86.467	0.252	92.905	7.9179	7.8046	7.0394	6.9562
LOC100129267	XR_037397.1	5270551			-0.863	0.549808	-3.85	0.004587	0.566	6.79	82.588	0.252	92.941	7.3024	7.1463	6.3586	6.3636
MGC39581	NM_152784.2	7650546	19	5723902	-0.863	0.549808	-3.76	0.005231	0.566	4.13	30.387	0.259	93.341	4.5792	4.5398	3.8215	3.5725
AXL	NM_021913.2	4640403	19	46459368	-0.863	0.549808	-3.5	0.007622	0.566	6.86	82.975	0.281	94.62	7.2995	7.2816	6.207	6.6487
MIR1827	NR_031728.1	5130333			-0.863	0.549808	-3.48	0.007867	0.566	3.95	14.609	0.283	94.751	4.1963	4.5693	3.6514	3.3885
LOC390466	XM_372521.1	3710471	14	34459695	-0.863	0.549808	-3.33	0.009938	0.568	8.39	91.571	0.3	95.507	8.8111	8.8297	7.6802	8.2337
C1orf210	NM_182517.1	3420435	1	43520214	-0.863	0.549808	-3.11	0.013912	0.587	4.36	49.381	0.326	96.511	4.4956	5.0833	3.7507	4.1022
LOC100132302	XR_038899.1	6400575	X	91124279	-0.863	0.549808	-2.6	0.030846	0.609	4.02	20.423	0.418	98.34	4.8238	4.0817	3.9322	3.2472
VEGFB	NM_003377.3	4060333	11	63762769	-0.862	0.550189	-3.72	0.005553	0.566	9.42	95.308	0.261	93.479	9.8829	9.8208	8.8514	9.1291
LOC284701	XM_934038.2	520010	1	241326034	-0.862	0.550189	-1.81	0.106115	0.679	4.04	21.723	0.737	99.767	5.2958	3.6379	3.8215	3.3885
PLAUR	NM_002659.2	730528	19	48852486	-0.861	0.550571	-3.76	0.00518	0.566	6	77.062	0.257	93.208	6.3183	6.5421	5.5273	5.6113
SUNC1	NM_001030019.1	6370731	7	48033983	-0.861	0.550571	-2.94	0.01791	0.587	4.05	22.57	0.348	97.038	4.4056	4.5465	3.9985	3.232
ZAK	NM_016653.2	3360431	2	173790175	-0.86	0.550953	-3.7	0.00568	0.566	6.26	78.993	0.261	93.453	6.5482	6.8326	5.8617	5.7993
HNRNPC	NM_001077442.1	5670487	14	21677424	-0.86	0.550953	-3.41	0.008784	0.566	8.04	89.869	0.288	94.955	8.6868	8.2607	7.4865	7.7405
TMEM14A	NM_014051.3	3780619	6	52546654	-0.86	0.550953	-3.08	0.014506	0.587	9.23	94.777	0.327	96.515	9.4624	9.8675	8.5236	9.087
LOC730396	XM_001129946.2	770598	6	29055548	-0.86	0.550953	-2.38	0.043617	0.62	3.73	3.559	0.473	98.88	3.9696	4.3446	2.7459	3.8485
LOC644569	XM_932248.1	50356	6	95111171	-0.86	0.550953	-1.79	0.110669	0.681	3.53	0.646	0.753	99.788	4.0782	3.8384	3.961	2.2354
AGL	NM_000645.2	5270041	1	100099393	-0.86	0.550953	-1.61	0.144362	0.705	3.94	13.917	0.898	99.886	4.5414	4.2047	4.4872	2.5389
TOX	NM_014729.2	7550451	8	59880996	-0.859	0.551335	-3.55	0.007076	0.566	3.82	6.767	0.272	94.156	4.3082	4.1963	3.2023	3.5846
KIAA0363	XM_001133202.1	6590156			-0.859	0.551335	-3.3	0.010265	0.574	4.03	21.429	0.298	95.429	4.1963	4.7285	3.6855	3.5207
TBX1	NM_080646.1	7560482	22	18146799	-0.859	0.551335	-3.07	0.014599	0.587	4.36	49.73	0.326	96.513	5.0813	4.5051	3.7399	4.1285
BTBD7	NM_001002860.2	1780403	14	93704341	-0.858	0.551717	-3.87	0.004408	0.566	5.99	76.937	0.246	92.494	6.439	6.3902	5.5592	5.5543
CLCN4	NM_001830.3	3870066	X	10162658	-0.857	0.552099	-3.68	0.005848	0.566	3.7	2.892	0.259	93.384	4.2752	3.9802	3.2605	3.2818
LOC100129250	XM_001725563.1	4490075	9	32542299	-0.857	0.552099	-3.56	0.007022	0.566	4.18	35.602	0.27	94.006	4.6319	4.595	3.5633	3.9503
LOC646895	XM_929858.2	7560682	19	23806912	-0.857	0.552099	-2.15	0.062965	0.636	3.69	2.797	0.551	99.344	4.0518	4.1963	2.5931	3.94
TAC3	NM_001006667.1	5310209	12	55690279	-0.857	0.552099	-2.06	0.072691	0.653	3.74	3.953	0.589	99.492	4.3903	3.9503	3.9985	2.6289
POLR2J4	NR_003655.1	580180			-0.856	0.552482	-3.74	0.005379	0.566	3.42	0.29	0.255	93.068	3.9409	3.7632	2.9109	3.0801
LIMS1	NM_004987.3	1090739	2	108658771	-0.856	0.552482	-3.71	0.005618	0.566	6.33	79.465	0.256	93.182	6.8825	6.6242	5.8599	5.9355
SLC38A4	NM_018018.2	2260181	12	45444928	-0.856	0.552482	-2.82	0.021643	0.593	4.46	55.288	0.364	97.383	4.6515	5.1355	4.384	3.6903
	AV731331	60139	12	88505274	-0.855	0.552865	-3.48	0.007842	0.566	4.59	60.016	0.275	94.349	5.2311	4.801	4.193	4.1285
MCART6	NM_001012755.1	6650291	X	103230889	-0.855	0.552865	-3.28	0.010665	0.578	4.01	19.208	0.297	95.372	4.7164	4.1534	3.5745	3.5846
LOC729417	XM_001130201.2	4210156	17	52517608	-0.855	0.552865	-2.89	0.019378	0.587	4.57	59.296	0.349	97.061	4.6646	5.3194	4.365	3.9099
CRSP2	XM_942908.1	60435			-0.854	0.553249	-3.14	0.013104	0.587	4.31	45.737	0.312	95.967	4.7628	4.7051	4.1995	3.5603
ANRIL	NR_003529.1	780538	9	22019523	-0.854	0.553249	-3.03	0.015759	0.587	3.95	14.565	0.329	96.574	4.5347	4.2216	3.8452	3.2023
LOC389857	XM_938184.2	3710468			-0.854	0.553249	-2.8	0.022427	0.595	4.18	35.534	0.366	97.43	4.7763	4.4473	3.3618	4.1527
LOC400752	XM_001133824.1	1340279			-0.854	0.553249	-2.69	0.026566	0.609	3.65	1.954	0.386	97.813	3.6885	4.47	2.9769	3.4737
LOC441081	XR_017029.1	2000470	5	69818600	-0.854	0.553249	-2.24	0.054439	0.625	3.87	8.973	0.51	99.147	4.4335	4.1534	2.8226	4.0567
YOD1	NM_018566.3	4590020	1	207217681	-0.853	0.553632	-3.79	0.005006	0.566	7.22	85.226	0.248	92.653	7.5945	7.6948	6.7184	6.8643
PAX4	NM_006193.1	3800292	7	127038165	-0.853	0.553632	-3.69	0.005726	0.566	4.08	26.025	0.255	93.119	4.5019	4.5177	3.7922	3.5207
CFHR3	NM_021023.3	4260008	1	195029674	-0.853	0.553632	-3.69	0.005776	0.566	3.81	6.29	0.255	93.13	4.1476	4.3293	3.4891	3.2818
CEACAM5	NM_004363.2	2360632	19	42224961	-0.853	0.553632	-3.46	0.008139	0.566	4.02	19.997	0.276	94.383	4.6646	4.2216	3.5633	3.616
	XM_168073	5570475			-0.853	0.553632	-2.12	0.065791	0.641	4.35	48.801	0.556	99.363	4.1375	5.4153	3.6752	4.1711
FLJ00312	XM_374801.3	2940608	10	48556260	-0.852	0.554016	-2.92	0.018559	0.587	4.32	46.99	0.342	96.896	4.8836	4.6161	4.2614	3.5344
LOC100128374	XM_001721079.1	4490746			-0.852	0.554016	-2.85	0.020634	0.587	4.22	38.905	0.353	97.144	4.2433	5.0562	3.8359	3.7605
SPON2	NM_012445.1	6450619	4	1151074	-0.851	0.5544	-2.99	0.016707	0.587	4.06	24.09	0.33	96.619	4.8388	4.1375	3.7399	3.5344
LOC653066	XM_930921.1	6200113	2	138136	-0.85	0.554785	-3.62	0.006414	0.566	5.82	75.685	0.258	93.326	6.207	6.2886	5.2414	5.5543
GPC4	NM_001448.2	6330270	X	132435446	-0.85	0.554785	-3.48	0.007867	0.566	6.61	81.421	0.271	94.07	7.2237	6.8416	6.0921	6.2727
NHS	XM_939091.1	3450184			-0.85	0.554785	-2.96	0.017486	0.587	4.15	32.14	0.333	96.708	4.5414	4.6019	3.35	4.0938
MXD3	NM_031300.2	2970121	5	176667071	-0.849	0.555169	-3.77	0.005094	0.566	5.89	76.136	0.245	92.45	6.3934	6.2269	5.4474	5.4746
CXCL12	NM_000609.4	4610615	10	44876268	-0.849	0.555169	-3.51	0.007564	0.566	3.64	1.848	0.267	93.83	3.8734	4.2647	3.1746	3.2652
LOC152663	XM_940836.1	4670075			-0.849	0.555169	-2.74	0.024605	0.603	4.02	20.256	0.37	97.523	4.7164	4.1705	3.9417	3.2472
FZD3	NM_017412.2	1470121	8	28420818	-0.848	0.555554	-3.81	0.004845	0.566	4.74	63.85	0.241	92.206	5.1162	5.2144	4.2985	4.3362
LOC651189	XM_940313.1	4150228			-0.848	0.555554	-3.23	0.011572	0.581	3.99	17.495	0.295	95.312	4.3668	4.4544	3.2776	3.8485
	DB310706	6450019	4	45587339	-0.848	0.555554	-1.88	0.095021	0.669	3.84	7.334	0.664	99.655	3.8734	4.6457	2.7141	4.1098
FOXD1	NM_004472.2	3870500	5	72778221	-0.847	0.55594	-3.74	0.005393	0.566	7.41	86.361	0.246	92.549	7.925	7.7359	6.9417	7.0245
UCRC	NM_013387.3	7550768	22	28496236	-0.845	0.556711	-3.17	0.012583	0.584	7.17	84.927	0.299	95.49	7.4247	7.7654	6.4995	7.0002
LRRC18	NM_001006939.2	2900221	10	49787576	-0.845	0.556711	-2.05	0.073077	0.653	4.13	30.696	0.572	99.445	4.7164	4.3921	3.0198	4.3978
DPH1	NM_001383.3	7510397	17	1891535	-0.844	0.557097	-3.41	0.008715	0.566	4.91	66.55	0.271	94.087	5.4976	5.1571	4.6309	4.3362
LOC100131986	XM_001717755.1	5690136	Y	57757155	-0.844	0.557097	-2.8	0.022374	0.595	4.45	54.38	0.353	97.15	4.888	4.85	3.6094	4.4412
LOC644086	XM_929460.1	2760730	7	29152798	-0.844	0.557097	-2.55	0.033479	0.609	4.35	48.815	0.406	98.145	5.0182	4.526	3.4891	4.3668
RYBP	NM_012234.4	840554	3	72508786	-0.843	0.557483	-3.72	0.005486	0.566	7.82	88.666	0.243	92.327	8.3417	8.1468	7.4151	7.3877
ABR	NM_001092.3	620240	17	908332	-0.843	0.557483	-3.72	0.005508	0.566	8.87	93.504	0.243	92.333	9.2408	9.3313	8.3546	8.5321
LOC100128327	XM_001726393.1	3180114			-0.843	0.557483	-3.47	0.007977	0.566	3.65	1.908	0.265	93.708	4.1705	3.9703	3.0481	3.4058
ANXA2	NM_001002857.1	3520328	15	60639433	-0.842	0.55787	-3.77	0.00511	0.566	7.51	86.992	0.239	92.037	7.9963	7.8732	7.1064	7.0785
LOC646782	XM_929734.1	2940348	19	21176030	-0.842	0.55787	-3.45	0.008228	0.566	4.22	38.727	0.265	93.731	4.4956	4.7896	3.6514	3.9503
LOC441505	XR_018332.2	6100131			-0.842	0.55787	-3.22	0.011626	0.581	4.96	67.354	0.29	95.084	5.2176	5.5434	4.3065	4.7702
ESCO2	NM_001017420.2	6590279	8	27661976	-0.842	0.55787	-2.48	0.037299	0.611	5.37	71.8	0.42	98.353	5.7454	5.8399	5.474	4.4281
TACC1	NM_006283.1	2940373	8	38829434	-0.841	0.558256	-3.63	0.006324	0.566	8.59	92.437	0.249	92.708	8.975	9.0492	8.035	8.3078
TNFAIP8L1	NM_152362.1	6200187	19	4604837	-0.841	0.558256	-3.59	0.006653	0.566	6.77	82.478	0.252	92.937	7.312	7.0771	6.2494	6.4571
LOC653600	XM_928349.1	770400	8	6842670	-0.841	0.558256	-3.02	0.016009	0.587	4.06	23.476	0.315	96.13	4.3154	4.6377	3.9417	3.3297
SFMBT1	NM_001005159.1	6900113	3	53078966	-0.841	0.558256	-1.83	0.103683	0.678	3.77	4.92	0.686	99.718	4.2992	4.0924	4.1698	2.5389
LOC728343	XM_001127346.1	1050630	X	101506869	-0.841	0.558256	-1.63	0.141212	0.703	3.59	1.169	0.839	99.852	3.7445	4.2808	2.2586	4.0847
DLEU2	XR_001514.1	1500661	13	49516020	-0.84	0.558644	-3.78	0.005018	0.566	7.43	86.447	0.236	91.779	7.8256	7.8657	6.9739	7.0377
MICB	NM_005931.2	3170064	6	31586763	-0.84	0.558644	-3.78	0.005083	0.566	8.91	93.678	0.237	91.88	9.3245	9.338	8.4392	8.5424
DR1	NM_001938.2	4890706	1	93600166	-0.84	0.558644	-3.67	0.005903	0.566	8.05	89.916	0.244	92.393	8.4527	8.4973	7.5197	7.7509
PREI3	NM_199482.1	6520379	2	198088574	-0.84	0.558644	-3.55	0.007066	0.566	3.42	0.254	0.254	93.06	3.9969	3.6733	3.0481	2.9425
C11orf82	NM_145018.2	2570019	11	82322969	-0.84	0.558644	-3.51	0.007491	0.566	7.95	89.361	0.258	93.322	8.2926	8.4394	7.3555	7.696
PREPL	NM_006036.3	5310204	2	44546557	-0.84	0.558644	-3.49	0.007775	0.566	6.28	79.158	0.261	93.449	6.5168	6.888	5.8043	5.9199
ASAP1	NM_018482.2	6840129	8	131135896	-0.839	0.559031	-3.64	0.006181	0.566	8.96	93.837	0.246	92.503	9.5022	9.2569	8.4953	8.5862
LOC100128406	XM_001724246.1	1770427	2	132805887	-0.839	0.559031	-3.28	0.010686	0.578	4.28	43.535	0.281	94.629	4.4754	4.9198	3.7181	3.9985
ATP11C	NM_001010986.1	2940551	X	138809011	-0.839	0.559031	-3.21	0.011798	0.582	5.4	72.016	0.288	94.959	5.8702	5.7645	4.701	5.256
LOC643089	XM_927911.1	2750121	10	14648638	-0.838	0.559419	-3.76	0.005173	0.566	3.97	16.174	0.236	91.798	4.4208	4.3604	3.5975	3.5071
LOC100131653	XM_001723206.1	360189			-0.838	0.559419	-3.37	0.009269	0.566	3.65	1.891	0.27	94.025	4.0518	4.0817	3.4594	2.9972
PPT2	NM_138717.1	1660575	6	32121352	-0.837	0.559806	-3.42	0.008661	0.566	4.86	65.906	0.264	93.642	5.4194	5.1355	4.601	4.2808
ANXA2P3	NR_001446.2	2810411	10	66256423	-0.837	0.559806	-3.07	0.01461	0.587	5.87	75.999	0.303	95.647	5.9999	6.5749	5.3023	5.5984
LOC641972	XM_935742.1	6100678			-0.837	0.559806	-2.91	0.018776	0.587	4.43	53.567	0.326	96.5	4.8238	4.8731	4.384	3.6398
EDA	NM_001005613.1	6020035	X	68806803	-0.836	0.560195	-3.62	0.00637	0.566	3.44	0.326	0.245	92.456	3.7863	3.9306	3.1361	2.9085
ALKBH8	NM_138775.1	6420044	11	106880688	-0.836	0.560195	-3.44	0.008385	0.566	5.65	74.33	0.261	93.506	6.0725	6.069	5.4407	5.0283
CCDC46	NM_145036.2	4010010	17	61278576	-0.836	0.560195	-2.31	0.048693	0.62	4.6	60.31	0.46	98.772	4.8275	5.2047	4.7324	3.6281
INE1	NM_003669.1	2350113	X	46949859	-0.836	0.560195	-2.21	0.056603	0.625	4.05	22.75	0.492	99.011	4.0437	4.888	4.0882	3.1716
MLL5	NM_182931.2	2710767	7	104540593	-0.835	0.560583	-3.66	0.005994	0.566	4.81	65.152	0.241	92.16	5.2463	5.2144	4.2838	4.5068
DARS2	NM_018122.3	5910097	1	172094085	-0.835	0.560583	-3.53	0.007287	0.566	6.28	79.166	0.252	92.89	6.6015	6.7991	5.7272	6.0038
BVES	NM_147147.2	7210349	6	105651709	-0.835	0.560583	-2.57	0.032319	0.609	4.6	60.412	0.39	97.879	5.1528	4.888	3.7181	4.6524
RHEBL1	NM_144593.1	4590398	12	49458658	-0.834	0.560972	-3.71	0.005557	0.566	5.49	72.863	0.236	91.791	5.8475	5.9694	5.1254	5.0232
LOC652513	XM_941984.1	2340639			-0.834	0.560972	-3.7	0.00566	0.566	3.88	9.807	0.237	91.882	4.3221	4.2733	3.3782	3.5484
EIF5A2	NM_020390.5	2190356	3	172089591	-0.834	0.560972	-3.46	0.008075	0.566	5.98	76.852	0.257	93.206	6.3454	6.4393	5.3711	5.7464
PNLIPRP1	NM_006229.2	3610296	10	118352038	-0.834	0.560972	-3.2	0.012093	0.583	3.99	17.743	0.285	94.834	4.6262	4.1877	3.3958	3.7499
SPAG11A	NM_001081552.2	60382	8	7721183	-0.834	0.560972	-2.23	0.055278	0.625	4.12	29.339	0.484	98.971	4.1375	4.9325	4.1698	3.232
PAGE2B	NM_001015038.1	4850528	X	55101504	-0.833	0.561361	-3.54	0.007246	0.566	3.77	4.66	0.25	92.767	4.1638	4.2047	3.5157	3.1864
ALG13	NM_018466.3	6660411	X	110814959	-0.833	0.561361	-3.33	0.009917	0.568	8.66	92.719	0.269	93.949	9.3146	8.8391	8.2247	8.2636
PAMR1	NM_015430.2	7320669	11	35453874	-0.833	0.561361	-2.34	0.04632	0.62	3.58	1.027	0.446	98.634	4.0157	3.9703	2.5931	3.7273
LCOR	NM_032440.1	7150554	10	98708585	-0.832	0.56175	-2.94	0.018116	0.587	6.86	82.99	0.317	96.227	7.0413	7.5109	6.1705	6.7179
LOC729668	NR_003524.1	580291	10	30693723	-0.831	0.562139	-2.24	0.054072	0.625	3.87	8.888	0.474	98.891	3.7098	4.85	3.6514	3.2472
NR1I2	NM_003889.3	3870068	3	119536617	-0.83	0.562529	-2.82	0.021768	0.593	3.86	8.844	0.334	96.733	3.9116	4.6457	3.5975	3.2992
TGIF1	NM_174886.1	2450743	18	3408155	-0.83	0.562529	-2.72	0.025612	0.607	3.8	5.846	0.352	97.131	4.6319	3.7984	3.4891	3.2818
LOC100133053	XM_001720766.1	380475	X	145699115	-0.83	0.562529	-2.65	0.028315	0.609	3.93	12.837	0.365	97.411	4.285	4.3993	3.0649	3.9596
C11orf49	NM_001003678.1	1940673	11	47135319	-0.829	0.562919	-3.65	0.006147	0.566	4.32	46.292	0.237	91.861	4.7303	4.7285	3.7922	4.0082
LRIT3	NM_198506.1	4900241	4	111012827	-0.829	0.562919	-3.18	0.012377	0.583	4.2	36.787	0.281	94.665	4.6515	4.5758	4.0624	3.5071
	BC030091	4590066	6	109811101	-0.829	0.562919	-2.83	0.02122	0.59	4.22	39.076	0.33	96.602	4.285	4.9945	3.971	3.6514
TRPC4	NM_016179.1	10367	13	37109167	-0.828	0.56331	-3.36	0.00938	0.566	4.2	36.434	0.261	93.487	4.7702	4.4473	3.6302	3.9306
COL13A1	NM_080815.2	5720692	10	71388731	-0.828	0.56331	-3.36	0.009413	0.566	4.96	67.299	0.261	93.473	5.3507	5.3884	4.7615	4.3221
LOC651751	XM_940969.1	6660379			-0.828	0.56331	-3.23	0.011504	0.581	4.39	51.418	0.275	94.332	4.7628	4.85	3.7181	4.2388
	CA428670	7200121			-0.828	0.56331	-2.94	0.017873	0.587	4.5	56.944	0.312	95.984	4.9639	4.8731	4.4412	3.7391
RORC	NM_005060.3	5390110	1	151804214	-0.828	0.56331	-2.74	0.024721	0.603	4.01	19.896	0.346	96.985	4.1375	4.7209	3.9035	3.2992
CYGB	NM_134268.3	7100731	17	74523559	-0.828	0.56331	-2.36	0.044589	0.62	4.28	43.918	0.433	98.499	4.5688	4.8238	4.4062	3.3297
LOC649191	XM_938256.1	3180255			-0.828	0.56331	-1.82	0.104668	0.678	3.54	0.714	0.664	99.657	3.9503	3.9503	2.3144	3.9306
NRP1	NM_003873.4	5720424	10	33507128	-0.827	0.5637	-3.71	0.005636	0.566	6.07	77.623	0.231	91.311	6.4412	6.5349	5.6188	5.7027
LOC730796	XM_001127241.1	2600026			-0.827	0.5637	-3.66	0.006034	0.566	3.97	15.907	0.234	91.561	4.4484	4.3141	3.6204	3.4891
NLRC4	NM_021209.3	1050020	2	32460579	-0.827	0.5637	-2.65	0.028251	0.609	3.92	12.149	0.361	97.332	4.7303	3.9306	3.3039	3.7036
MIR611	NR_030342.1	5560446			-0.826	0.564091	-3.59	0.006702	0.566	4.29	44.128	0.238	91.965	4.8002	4.595	3.9509	3.7931
PPAT	NM_002703.3	4070132	4	57259919	-0.826	0.564091	-3.45	0.008263	0.566	9.13	94.417	0.251	92.85	9.4665	9.6151	8.5427	8.887
ALOX5AP	NM_001629.2	3930343	13	30236347	-0.826	0.564091	-3.38	0.009152	0.566	4.38	50.708	0.257	93.252	4.5932	4.9945	4.0349	3.9011
2013-09-10	NM_178584.1	7400327	2	110301895	-0.826	0.564091	-2.18	0.059516	0.632	4.42	53.226	0.488	98.999	5.0421	4.6305	4.601	3.4194
CYP4Z1	NM_178134.2	6480215	1	47344411	-0.826	0.564091	-1.84	0.101542	0.676	3.41	0.246	0.648	99.621	4.1127	3.5366	2.2586	3.7391
PRRX2	NM_016307.3	4150204	9	131524659	-0.825	0.564482	-3.7	0.005715	0.566	8.87	93.534	0.229	91.169	9.2418	9.3268	8.4168	8.5027
SGPL1	NM_003901.2	3370273	10	72309382	-0.825	0.564482	-3.69	0.005802	0.566	5.73	74.938	0.23	91.271	6.1882	6.0883	5.3647	5.2613
NUP50	NM_007172.2	3990356	22	43938774	-0.825	0.564482	-3.64	0.006234	0.566	3.87	9.47	0.234	91.559	4.2752	4.2979	3.5633	3.3606
ST6GALNAC3	NM_152996.1	2070100	1	76868513	-0.825	0.564482	-3.63	0.006275	0.566	4.33	47.361	0.234	91.614	4.6515	4.8312	3.971	3.862
PPP1R14C	NM_030949.2	5490437	6	150570697	-0.825	0.564482	-3.63	0.006322	0.566	6.86	82.996	0.234	91.628	7.312	7.2337	6.3486	6.548
ITGA5	NM_002205.2	6330338	12	54789098	-0.825	0.564482	-3.54	0.007205	0.566	6.92	83.365	0.242	92.215	7.2135	7.4461	6.4113	6.5989
LOC389517	NR_003664.1	610347			-0.825	0.564482	-3.53	0.007344	0.566	3.94	13.497	0.243	92.3	4.3838	4.3141	3.6752	3.3734
LOC730347	XM_001130955.1	7560112			-0.825	0.564482	-2.94	0.017998	0.587	4.28	43.497	0.31	95.89	4.6453	4.7347	3.5157	4.2138
S100A10	NM_002966.2	540681	1	151955580	-0.824	0.564874	-3.51	0.007544	0.566	11.88	99.134	0.244	92.376	12.2038	12.3879	11.3383	11.6044
MIR1271	NR_031569.1	6550193			-0.824	0.564874	-3.26	0.01095	0.579	3.84	7.465	0.267	93.841	4.0605	4.4391	3.5866	3.2652
LOC400578	XR_017543.1	610025	17	16673907	-0.824	0.564874	-3.18	0.012498	0.584	4.36	49.611	0.277	94.457	4.7303	4.8175	4.2228	3.6767
LOC100130563	XM_001715097.1	4390767	13	20393961	-0.824	0.564874	-3.09	0.014331	0.587	4.04	22.534	0.288	94.997	4.1798	4.7347	3.7588	3.5071
REEP1	NM_022912.1	1340192	2	86294886	-0.823	0.565265	-3.62	0.006394	0.566	6.57	81.142	0.233	91.529	6.9263	7.0362	6.0669	6.2502
LOC652751	XM_001719824.1	1820598			-0.823	0.565265	-3.53	0.007347	0.566	4.28	43.742	0.241	92.147	4.6136	4.7691	3.9985	3.7391
FSD1	NM_024333.1	1580156	19	4263013	-0.823	0.565265	-3.49	0.007745	0.566	5.61	73.943	0.244	92.363	6.168	5.8681	5.1254	5.2656
URB2	NM_014777.2	1580433	1	229795341	-0.823	0.565265	-3.38	0.009207	0.566	7.33	85.876	0.255	93.11	7.8057	7.6677	7.1108	6.7163
FAM48A	NM_017569.3	6590086	13	37633618	-0.823	0.565265	-3.31	0.010231	0.574	3.91	11.799	0.262	93.521	4.5098	4.1375	3.3618	3.6398
LOC442204	XM_498088.2	780039	6	33405407	-0.823	0.565265	-2.99	0.016685	0.587	3.6	1.308	0.3	95.524	4.0059	4.0266	3.5271	2.8597
SEC14L1	NM_003003.2	1770044	17	72721073	-0.822	0.565657	-3.69	0.005759	0.566	4.74	63.897	0.227	91.052	5.1737	5.1355	4.384	4.2808
LOC283887	XM_929898.1	7650148	16	24986184	-0.822	0.565657	-3.1	0.013965	0.587	3.98	16.868	0.284	94.819	4.2351	4.5465	3.8215	3.3152
WDR17	NM_170710.3	3850348	4	177254671	-0.822	0.565657	-2.86	0.020434	0.587	4.11	28.604	0.318	96.261	4.2351	4.8081	3.4594	3.94
	CB529590	7150653	9	89518666	-0.821	0.566049	-2.71	0.025782	0.608	4.27	42.614	0.343	96.924	4.8836	4.47	4.2228	3.4891
AKAP12	NM_005100.2	3290564	6	151668591	-0.82	0.566442	-3.41	0.008808	0.566	5.32	71.214	0.249	92.719	5.5319	5.919	4.8987	4.9125
CDC25C	NM_001790.3	4200451	5	137664181	-0.82	0.566442	-3.37	0.009278	0.566	5.56	73.509	0.252	92.926	6.1399	5.8022	5.0337	5.2691
POLR3F	NM_006466.2	610019	20	18413153	-0.82	0.566442	-3.14	0.013121	0.587	7.38	86.206	0.277	94.413	7.8349	7.743	6.6918	7.2466
LOC729069	XM_001721674.1	4830278			-0.818	0.567228	-2.99	0.016742	0.587	3.91	11.473	0.295	95.331	4.4208	4.2132	3.8112	3.1864
ASAP2	NM_003887.2	5340646	2	9545148	-0.818	0.567228	-2.97	0.017061	0.587	6.84	82.874	0.297	95.401	7.3412	7.1644	6.1133	6.7557
CCDC108	NM_152389.2	6420332	2	219900251	-0.818	0.567228	-2.92	0.018708	0.587	4.36	49.484	0.305	95.713	4.528	5.0088	3.6949	4.2067
LOC642490	XR_016152.1	460035	9	40803118	-0.818	0.567228	-2.53	0.034169	0.609	4.3	45.536	0.376	97.648	4.6576	4.7691	4.3714	3.4194
KCNN1	NM_002248.3	4250064	19	17970459	-0.817	0.567621	-2.85	0.020753	0.588	4.49	56.285	0.314	96.077	4.7702	5.0201	3.729	4.4281
LOC654780	XR_040612.1	4850240	16	82784635	-0.816	0.568015	-3.49	0.007799	0.566	4.19	36.285	0.238	91.923	4.4888	4.7123	3.893	3.6767
LOC100132413	XM_001725738.1	780564	2	69009484	-0.816	0.568015	-2.98	0.016826	0.587	4.33	47.117	0.294	95.247	4.5792	4.888	4.2067	3.6281
LOC644083	XM_930110.1	4070156	1	19598653	-0.815	0.568408	-2.64	0.028973	0.609	4.16	33.463	0.35	97.076	4.5491	4.5886	4.193	3.3152
CDKN1B	NM_004064.2	130309	12	12765845	-0.814	0.568803	-3.11	0.013872	0.587	6.68	81.815	0.276	94.366	6.8092	7.3601	6.1926	6.3478
LOC285943	XR_040116.1	4890692			-0.814	0.568803	-2.95	0.017631	0.587	6.58	81.211	0.295	95.319	7.088	6.885	5.8543	6.4916
RIMS2	NM_014677.3	3450164	8	104996998	-0.814	0.568803	-2.69	0.026774	0.609	4.29	44.183	0.339	96.837	4.8098	4.5758	4.2838	3.4737
POM121L2	XM_001717703.1	3060427	6	27384930	-0.814	0.568803	-1.47	0.177347	0.726	3.74	3.815	0.927	99.909	3.1554	5.1301	3.6204	3.0377
LOC100132177	XM_001716750.1	3780086			-0.813	0.569197	-3.43	0.00851	0.566	4.17	34.674	0.241	92.164	4.6005	4.5618	3.9417	3.5937
CAST	NM_001042442.1	6560136	5	96108707	-0.813	0.569197	-3.18	0.012365	0.583	7.12	84.586	0.265	93.724	7.5726	7.4713	6.4539	6.9643
SOCS2	NM_003877.3	1690692	12	92493453	-0.813	0.569197	-2.78	0.023259	0.599	6.84	82.867	0.323	96.382	7.4157	7.081	6.0812	6.7886
RGPD1	NM_001024457.1	6020196	2	87094367	-0.813	0.569197	-1.16	0.278024	0.779	3.31	0.095	1.44	99.97	3.8402	3.5866	1.5541	4.2471
RAB37	NM_001006638.1	3830184	17	70253884	-0.812	0.569592	-3.6	0.006626	0.566	4.58	59.728	0.226	90.923	4.8999	5.0677	4.1293	4.2138
GPR114	NM_153837.1	7380273	16	56168442	-0.812	0.569592	-3.08	0.014499	0.587	5.63	74.125	0.277	94.417	6.3031	5.7682	5.1057	5.3417
SERP2	NM_001010897.1	1710053	13	43869663	-0.811	0.569987	-3.42	0.008554	0.566	3.48	0.432	0.239	92.029	3.7545	4.0171	2.9632	3.1864
KRT8P9	XR_017231.2	1410097	15	68939242	-0.811	0.569987	-3.15	0.012936	0.587	6.3	79.257	0.266	93.782	6.4423	6.9605	5.9542	5.8274
DLK2	NM_023932.2	1070037	6	43531197	-0.811	0.569987	-2.05	0.073346	0.653	4.62	60.951	0.516	99.174	5.5135	4.5398	3.7588	4.673
IL21R	NM_181078.1	1570392	16	27321367	-0.81	0.570382	-3.48	0.007919	0.566	4.24	40.401	0.234	91.58	4.6074	4.6836	3.9802	3.6903
C6orf211	NM_024573.1	3710465	6	151790834	-0.81	0.570382	-3.01	0.016241	0.587	6.07	77.553	0.284	94.821	6.1901	6.7522	5.8001	5.5218
NHLH2	NM_005599.2	1430446	1	116180551	-0.81	0.570382	-2.66	0.027847	0.609	3.61	1.349	0.339	96.833	4.1963	3.8292	3.5866	2.819
LOC401180	XM_379325.2	610224	5	34702291	-0.81	0.570382	-2.04	0.073983	0.654	4.42	53.005	0.518	99.187	5.1359	4.511	3.4207	4.6056
LOC650846	XM_944386.1	5700619			-0.809	0.570777	-2.94	0.01802	0.587	3.85	8.304	0.292	95.16	4.2351	4.2808	3.1167	3.7817
TUBB8	NM_177987.1	6200324	10	83193	-0.809	0.570777	-2.53	0.034421	0.609	4.03	20.734	0.366	97.423	4.3527	4.5051	3.156	4.0847
LOC643808	XM_927089.1	150296	20	44552890	-0.808	0.571173	-3.58	0.006746	0.566	4.05	23.298	0.223	90.671	4.4554	4.4609	3.7399	3.5603
PCGF5	NM_032373.3	3440377	10	93028982	-0.808	0.571173	-2.87	0.019991	0.587	4.59	60.172	0.301	95.573	4.6831	5.3112	4.026	4.3522
ANKRD2	NM_020349.2	840333	10	99332457	-0.808	0.571173	-2.42	0.040512	0.618	4.03	20.876	0.389	97.857	4.4609	4.3993	3.1167	4.1285
LOC100134424	XR_038546.1	6290471			-0.807	0.571569	-3.63	0.006331	0.566	6.17	78.332	0.219	90.309	6.6233	6.5274	5.7474	5.7887
LOC729852	XR_040870.1	6840564	7	7883574	-0.807	0.571569	-3.53	0.007329	0.566	4.98	67.65	0.227	91.029	5.4003	5.3683	4.696	4.4576
TAS2R1	NM_019599.2	4780228	5	9682159	-0.807	0.571569	-3.17	0.012623	0.584	4.07	24.594	0.261	93.494	4.4956	4.4473	3.4083	3.9203
ZNF532	NM_018181.4	2360437	18	54804526	-0.807	0.571569	-2.6	0.030484	0.609	5.14	69.387	0.347	97.008	5.8098	5.2712	4.384	5.0836
LOC642231	XM_936385.1	7210193			-0.807	0.571569	-1.55	0.15766	0.715	3.9	11.205	0.829	99.843	3.3641	5.2513	3.3369	3.6638
LOC647086	XR_038406.1	6020703			-0.806	0.571965	-3.64	0.0062	0.566	4.99	67.801	0.217	90.11	5.3874	5.4023	4.6136	4.5632
LOC340511	XM_944546.1	1780382			-0.806	0.571965	-3.56	0.006954	0.566	3.75	4.029	0.222	90.61	4.2047	4.0924	3.4207	3.2652
MC1R	NM_002386.2	520292	16	88514810	-0.806	0.571965	-3.4	0.008855	0.566	7.53	87.102	0.237	91.849	8.1015	7.7642	7.1676	7.0856
ERAP1	NM_001040458.1	3930161	5	96144589	-0.806	0.571965	-3.19	0.012301	0.583	4.47	55.58	0.258	93.299	4.6711	5.0778	3.9236	4.2138
TPRXL	NR_002223.1	2690347	3	14081637	-0.806	0.571965	-3.14	0.013304	0.587	4	18.799	0.264	93.644	4.285	4.526	3.3618	3.8376
LOC442096	XM_497945.2	1770414	3	172153642	-0.806	0.571965	-3.06	0.015032	0.587	3.6	1.275	0.274	94.254	4.0518	3.9604	2.9109	3.4891
DAZL	NM_001351.2	6620747	3	16628983	-0.806	0.571965	-2.95	0.01784	0.587	3.94	14.042	0.289	95.022	4.5491	4.1464	3.8009	3.2818
LOC643968	XM_927221.1	6580204	11	107358737	-0.806	0.571965	-2.87	0.020103	0.587	4.22	38.682	0.299	95.492	4.3604	4.888	4.0521	3.5846
FLJ13224	XM_495918.3	70228	12	31369916	-0.806	0.571965	-2.84	0.021083	0.59	4.33	47.081	0.304	95.674	4.751	4.7051	4.2838	3.5603
	AW995179	1570008	8	17662290	-0.806	0.571965	-2.77	0.023548	0.601	4.49	56.205	0.315	96.113	4.9583	4.8175	4.4609	3.7036
HOXA10	NM_153715.2	3290427	7	27185791	-0.805	0.572362	-3.47	0.007945	0.566	5.27	70.744	0.23	91.207	5.8065	5.5434	4.9218	4.8175
ATP8B2	NM_001005855.1	4490446	1	152576515	-0.805	0.572362	-3.3	0.010258	0.574	3.95	14.135	0.244	92.41	4.3668	4.3293	3.3369	3.7499
TNIK	NM_015028.1	3800376	3	172264384	-0.805	0.572362	-2.23	0.054896	0.625	5.87	75.984	0.44	98.571	6.0278	6.512	4.9383	5.9915
EPB41L5	NM_020909.2	7320646	2	120652735	-0.804	0.572759	-3.42	0.008654	0.566	4.25	41.183	0.233	91.531	4.5688	4.7347	3.707	3.9886
SYNE1	NM_033071.2	6380402	6	152681044	-0.804	0.572759	-3.18	0.012382	0.583	3.65	1.967	0.257	93.225	3.862	4.2489	3.4083	3.0943
MMP28	NM_024302.3	4810477	17	34093034	-0.804	0.572759	-2.61	0.030228	0.609	3.81	6.174	0.343	96.917	4.285	4.1375	2.9769	3.8376
KRT26	NM_181539.3	1260301	17	36176363	-0.804	0.572759	-2.46	0.038623	0.615	3.65	1.944	0.376	97.654	3.7545	4.3527	3.6398	2.8597
DTL	NM_016448.1	5570296	1	210344381	-0.803	0.573156	-3.55	0.007134	0.566	6.04	77.333	0.221	90.494	6.3737	6.5036	5.5626	5.7096
PDE4DIP	NM_014644.3	160288	1	143585330	-0.803	0.573156	-3.38	0.009106	0.566	3.75	4.076	0.235	91.686	4.0157	4.2808	3.232	3.4594
HAS2	NM_005328.1	840204	8	122695474	-0.803	0.573156	-2.48	0.037001	0.61	3.85	8.181	0.369	97.504	4.4412	4.0646	3.0071	3.8922
SPPL2A	NM_032802.3	4920398	15	51012170	-0.802	0.573554	-3.59	0.006652	0.566	7.74	88.262	0.217	90.104	8.0836	8.2037	7.3595	7.3234
CYP26A1	NM_057157.1	990364	10	94823222	-0.802	0.573554	-3.53	0.007343	0.566	4.42	52.942	0.222	90.585	4.7164	4.9198	4.0521	3.9802
LOC388381	XM_936648.1	2030301			-0.802	0.573554	-2.23	0.054889	0.625	4.05	22.919	0.435	98.533	4.8943	4.0074	4.0164	3.2818
B3GALT3	NM_033169.1	3940711	3	162305268	-0.801	0.573951	-3.18	0.012419	0.583	4.16	33.275	0.254	93.015	4.6646	4.4544	3.5377	3.9802
TGFB1I1	NM_015927.3	7330142	16	31396652	-0.801	0.573951	-3.12	0.013567	0.587	5.45	72.55	0.261	93.451	5.7645	5.945	4.8049	5.3026
FOXN2	NM_002158.3	6020612	2	48459743	-0.8	0.574349	-3.51	0.007535	0.566	7.55	87.224	0.222	90.553	8.0509	7.8546	7.0978	7.2079
MERTK	NM_006343.2	7550066	2	112503000	-0.8	0.574349	-3.38	0.009154	0.566	6.03	77.316	0.233	91.539	6.2645	6.6043	5.6626	5.6056
LOC647862	XM_937831.1	4230504			-0.8	0.574349	-3.29	0.010493	0.576	3.77	4.58	0.241	92.179	4.0253	4.3046	3.5157	3.2152
LOC651390	XM_942401.1	5310725			-0.799	0.574747	-3.56	0.006993	0.566	3.77	4.815	0.217	90.045	4.1963	4.1464	3.4461	3.2992
SP110	NM_080424.1	5870184	2	230744660	-0.799	0.574747	-3.34	0.009745	0.567	4.56	59.167	0.236	91.772	4.9191	5.0026	4.3434	3.9802
TAS1R3	NM_152228.1	1740128	1	1257965	-0.799	0.574747	-3.25	0.011228	0.581	4.02	20.171	0.246	92.473	4.5866	4.2489	3.4761	3.7605
GCSH	NM_004483.3	60196	16	81129743	-0.799	0.574747	-2.98	0.01691	0.587	9.24	94.792	0.277	94.41	9.9311	9.3522	8.7345	8.9502
	CN285178	7210768	4	180547548	-0.799	0.574747	-2.74	0.024518	0.603	4.7	62.965	0.313	96.001	5.1929	5.0026	3.9236	4.673
	BU787513	6550468	X	7898924	-0.799	0.574747	-2.12	0.065509	0.641	3.42	0.275	0.47	98.859	3.2818	4.3604	2.7141	3.3297
HPGD	NM_000860.3	4250364	4	175648475	-0.798	0.575146	-3.41	0.008688	0.566	4.07	25.123	0.228	91.114	4.5618	4.384	3.8009	3.5484
STS-1	NM_032873.3	1940524	11	122190247	-0.798	0.575146	-3.38	0.009126	0.566	7.31	85.787	0.231	91.334	7.5913	7.8322	6.7973	7.0302
MED27	NM_004269.2	5360446	9	134955192	-0.798	0.575146	-3.38	0.009147	0.566	7.25	85.402	0.232	91.391	7.5227	7.7753	6.9628	6.7383
LOC729986	XM_001717334.1	10056			-0.798	0.575146	-3.21	0.01185	0.582	3.84	7.504	0.248	92.649	4.069	4.4062	3.5975	3.2818
MIR541	NR_030594.1	1400647			-0.798	0.575146	-3.17	0.012599	0.584	4.12	29.188	0.252	92.939	4.5414	4.4899	3.961	3.4737
TMEM47	NM_031442.2	2570730	X	34555202	-0.797	0.575545	-2.25	0.053675	0.625	4.35	48.987	0.424	98.404	4.413	5.0895	3.5019	4.4062
CXXC5	NM_016463.7	1050279	5	139041167	-0.796	0.575944	-3.54	0.007195	0.566	8.84	93.409	0.216	89.941	9.3011	9.1747	8.4945	8.3898
CD47	NM_198793.2	4150193	3	109245076	-0.796	0.575944	-3.34	0.009658	0.567	7.09	84.394	0.233	91.495	7.6449	7.3324	6.6044	6.7806
LOC647606	XM_937260.1	430255			-0.795	0.576343	-3.59	0.006691	0.566	4.26	42.121	0.211	89.492	4.6319	4.6836	3.8635	3.862
PMP22	NM_153321.1	270538	17	15165758	-0.795	0.576343	-2.99	0.016555	0.587	5.96	76.727	0.271	94.061	6.0858	6.6265	5.4323	5.6897
KPNA2	NM_002266.2	4230196	17	63469563	-0.794	0.576743	-3.49	0.00778	0.566	9.78	96.242	0.218	90.18	10.0867	10.2638	9.3179	9.4453
GAS2L3	NM_174942.1	6400356	12	99542644	-0.794	0.576743	-3.4	0.008894	0.566	5.98	76.92	0.226	90.889	6.3241	6.4369	5.445	5.7287
RPS6KB1	NM_003161.2	1940576	17	55382430	-0.793	0.577143	-3.58	0.006756	0.566	8.92	93.718	0.21	89.409	9.3348	9.3014	8.5071	8.5424
LOC100128516	XR_039701.1	4060709			-0.793	0.577143	-3.39	0.009039	0.566	4.31	46.196	0.226	90.951	4.8661	4.5541	3.9322	3.9011
TAF13	NM_005645.3	4150553	1	109617679	-0.793	0.577143	-3.09	0.014328	0.587	6.07	77.621	0.257	93.259	6.6875	6.2547	5.8335	5.5218
PRKCE	NM_005400.2	1690039	2	46266226	-0.793	0.577143	-2.95	0.017637	0.587	4.68	62.491	0.274	94.256	4.9307	5.2182	4.0067	4.5562
SLC39A1	NM_014437.3	5670368	1	153931812	-0.792	0.577543	-3.54	0.007197	0.566	8.26	90.945	0.212	89.63	8.6372	8.6754	7.7966	7.9314
	DB148555	4210201	18	5307564	-0.792	0.577543	-3.39	0.008965	0.566	4.05	23.41	0.225	90.82	4.4554	4.4473	3.8112	3.5071
DCK	NM_000788.1	5290703	4	72114509	-0.792	0.577543	-2.73	0.025045	0.605	7.33	85.918	0.307	95.806	7.4973	7.9591	6.6304	7.2414
DTX2	XM_001133140.1	650358			-0.792	0.577543	-2.65	0.028402	0.609	3.93	13.091	0.321	96.32	4.5414	4.1119	3.8833	3.1864
WSB2	NM_018639.3	6550703	12	118470799	-0.791	0.577943	-3.47	0.007937	0.566	7.66	87.817	0.216	90.026	7.9647	8.137	7.1934	7.3271
QKI	XM_945803.1	6960528			-0.791	0.577943	-3.38	0.009195	0.566	4.05	23.413	0.225	90.881	4.4412	4.4609	3.5019	3.8173
	AA482005	1030681	2	216512302	-0.791	0.577943	-3.37	0.00933	0.566	4.08	25.428	0.226	90.919	4.6074	4.3375	3.7694	3.5937
ERI1	NM_153332.3	5360398	8	8890610	-0.791	0.577943	-3.3	0.010271	0.574	7.98	89.541	0.231	91.385	8.1991	8.5487	7.6469	7.5197
KLHDC5	NM_020782.1	4490273	12	27846826	-0.791	0.577943	-3.3	0.010275	0.574	8.86	93.485	0.232	91.393	9.3001	9.209	8.283	8.6445
SLC38A1	NM_030674.3	2070687	12	46662323	-0.791	0.577943	-3.09	0.014289	0.587	4.44	54.236	0.255	93.127	4.5792	5.1002	4.0882	4.0082
C11orf40	NM_144663.1	110477	11	4593451	-0.791	0.577943	-2.87	0.019972	0.587	3.84	7.349	0.283	94.734	4.0157	4.4473	3.6949	3.1864
CDH9	NM_016279.2	2340274	5	26917335	-0.791	0.577943	-2.54	0.033756	0.609	4.32	46.973	0.341	96.888	4.8002	4.6377	3.4891	4.3668
FRG2B	NM_001080998.1	2940039	10	135438906	-0.791	0.577943	-1.88	0.095858	0.669	3.4	0.218	0.563	99.401	3.551	4.0355	2.3144	3.6903
SOCS2	NM_003877.3	6770673	12	92493848	-0.79	0.578344	-3.55	0.007068	0.566	8.83	93.367	0.21	89.361	9.2733	9.1778	8.4234	8.4473
CHP2	NM_022097.2	2680332	16	23677491	-0.79	0.578344	-3.34	0.009655	0.567	3.68	2.467	0.227	91.044	3.9969	4.1534	3.435	3.1349
CTRB2	NM_001025200.3	4010315	16	75238016	-0.79	0.578344	-3.28	0.010649	0.577	4.47	55.646	0.233	91.525	4.8098	4.9266	3.893	4.2634
MRS2	NM_020662.2	6480440	6	24423870	-0.79	0.578344	-3.19	0.012137	0.583	7.01	83.907	0.241	92.2	7.1953	7.6116	6.5297	6.6981
C12orf40	NM_173599.1	4260072	12	38588024	-0.79	0.578344	-3.02	0.01599	0.587	4.25	41.479	0.262	93.549	4.7628	4.5332	3.5975	4.1195
	DB337880	2640563	5	158943287	-0.79	0.578344	-2.74	0.02474	0.603	4.35	48.538	0.303	95.611	4.8719	4.6093	3.5975	4.3046
RUNX2	NM_001015051.2	70201	6	45624731	-0.79	0.578344	-2.52	0.034872	0.609	4.4	51.659	0.344	96.955	5.2042	4.3778	4.1851	3.8173
CRYBB1	NM_001887.3	3310653	22	26995407	-0.79	0.578344	-1.96	0.084982	0.663	3.8	5.875	0.525	99.225	4.1877	4.2047	4.0945	2.717
EIF5A2	NM_020390.5	7560592	3	172089193	-0.789	0.578745	-3.56	0.006964	0.566	4.72	63.477	0.208	89.204	5.1478	5.0895	4.3293	4.3293
LOC729497	XR_015501.2	7210523			-0.789	0.578745	-3.46	0.008078	0.566	3.7	2.879	0.215	89.928	4.1877	3.9985	3.3618	3.2472
FEM1B	NM_015322.3	1690746	15	66370310	-0.789	0.578745	-3.3	0.010284	0.574	4.52	57.386	0.23	91.268	4.7374	5.0833	4.1851	4.0567
FRMD6	NM_152330.2	7510309	14	51266219	-0.789	0.578745	-3.1	0.014014	0.587	6.26	78.971	0.252	92.894	6.7187	6.585	5.6146	6.1102
IQCA1	NM_024726.3	7320064	2	237233114	-0.789	0.578745	-2.92	0.018429	0.587	3.96	14.859	0.274	94.264	4.3154	4.384	3.8734	3.2472
EYA2	NM_172112.1	4290706	20	45250552	-0.789	0.578745	-2.2	0.057961	0.627	3.92	12.284	0.428	98.446	4.0945	4.5332	2.9935	4.0567
LOC643752	XM_928885.1	6450132	5	75502282	-0.788	0.579146	-3.55	0.007055	0.566	4.24	40.006	0.207	89.094	4.6005	4.6589	3.8359	3.8485
MELK	NM_014791.2	2340392	9	36633149	-0.788	0.579146	-3.46	0.008149	0.566	8.87	93.525	0.216	89.971	9.2292	9.3001	8.3684	8.5841
TSHR	NM_001018036.1	4050022	14	80632752	-0.788	0.579146	-3	0.016324	0.587	4.01	19.659	0.262	93.523	4.5558	4.2564	3.8635	3.3734
CEND1	NM_016564.3	5560162	11	787376	-0.788	0.579146	-2.98	0.016983	0.587	5.02	68.087	0.265	93.72	5.5135	5.3056	4.8987	4.3446
ETV5	NM_004454.1	770746	3	187247011	-0.788	0.579146	-2.91	0.01876	0.587	8.67	92.742	0.274	94.258	9.01	9.113	7.9611	8.5862
STON2	NM_033104.2	460577	14	81737203	-0.788	0.579146	-2.15	0.062391	0.636	3.68	2.388	0.442	98.59	3.6514	4.4899	2.8616	3.7036
ISL1	NM_002202.1	4760553	5	50725929	-0.787	0.579548	-3.5	0.007691	0.566	6.81	82.681	0.212	89.562	7.1331	7.2711	6.3615	6.468
TET1	NM_030625.2	5490767	10	70124034	-0.787	0.579548	-3.4	0.008896	0.566	4.87	66.109	0.22	90.343	5.4032	5.1254	4.4609	4.4936
C10orf62	NM_001009997.1	6560364	10	99340555	-0.787	0.579548	-3.36	0.009457	0.566	4.16	33.671	0.223	90.712	4.6319	4.4829	3.6302	3.9099
LOC645137	XM_928167.2	160463	15	28034	-0.787	0.579548	-2.99	0.01669	0.587	4.13	30.937	0.263	93.623	4.3082	4.7475	3.9322	3.5484
C9orf91	NM_153045.2	5720131	9	116447348	-0.787	0.579548	-2.65	0.028516	0.609	6.03	77.282	0.315	96.121	6.6567	6.1904	5.3063	5.9671
THSD7B	NM_001080427.1	2680008	2	138030195	-0.786	0.57995	-3	0.016452	0.587	4.26	42.37	0.261	93.458	4.7436	4.5693	3.5975	4.1436
EDNRB	NM_003991.1	3840465	13	77390773	-0.785	0.580352	-3.4	0.008829	0.566	4.04	21.865	0.217	90.079	4.4754	4.384	3.7694	3.5207
MIR557	NR_030284.1	6130343			-0.785	0.580352	-3	0.016288	0.587	4.36	49.457	0.259	93.343	4.4888	5.0143	4.0717	3.862
PSRC1	NM_001032290.1	1070762	1	109822305	-0.785	0.580352	-2.87	0.020201	0.587	7.83	88.717	0.278	94.474	8.5267	7.9206	7.3102	7.5668
AKAP8	NM_005858.2	6550053	19	15464546	-0.785	0.580352	-2.69	0.026736	0.609	6.68	81.823	0.306	95.744	7.3227	6.8177	6.5804	5.9898
PTPN20B	NM_001042363.3	3450594	10	48795394	-0.785	0.580352	-2.55	0.033158	0.609	4.01	19.519	0.331	96.653	4.0437	4.7623	3.8635	3.3734
LOC100130716	XM_001720551.1	1070142			-0.785	0.580352	-2.47	0.037593	0.611	4.5	56.908	0.349	97.055	4.5208	5.2712	4.384	3.8376
DEFB125	NM_153325.2	2970196	20	24975	-0.785	0.580352	-1.97	0.083645	0.662	3.93	13.042	0.511	99.155	4.2924	4.3527	2.8616	4.2138
PCDHA10	NM_031859.1	3460433	5	140218282	-0.785	0.580352	-1.94	0.087581	0.664	3.18	0.025	0.525	99.231	3.6273	3.5113	2.0942	3.4737
PRKAA1	NM_206907.3	6980750	5	40795875	-0.784	0.580754	-3.42	0.008599	0.566	7.67	87.885	0.214	89.837	7.9888	8.1274	7.1749	7.3741
FOXI1	NM_012188.4	4050433	5	169468976	-0.784	0.580754	-3.19	0.012239	0.583	4.22	38.735	0.237	91.84	4.5688	4.6589	4.0437	3.616
LOC100131851	XM_001716920.1	6560095			-0.784	0.580754	-3.01	0.016048	0.587	3.8	5.674	0.256	93.195	4.121	4.2564	3.6752	3.1349
ERGIC2	NM_016570.2	6660674	12	29493832	-0.784	0.580754	-2.98	0.016826	0.587	6.61	81.417	0.261	93.46	6.75	7.2491	6.3615	6.0694
DENND1B	NM_144977.2	3390725	1	195788112	-0.783	0.581157	-3.08	0.014467	0.587	3.93	13.246	0.248	92.626	4.528	4.121	3.6949	3.3885
C8orf37	NM_177965.2	4280470	8	96328001	-0.783	0.581157	-2.29	0.050445	0.621	4.57	59.484	0.394	97.942	4.7823	5.1411	4.6799	3.6767
SLC12A7	NM_006598.1	4880403	5	1104002	-0.783	0.581157	-1.77	0.113363	0.683	3.89	10.461	0.61	99.538	4.4554	4.1119	4.2614	2.7403
LOC653464	XM_209227.7	630687	1	120835947	-0.782	0.58156	-2.63	0.029324	0.609	3.59	1.15	0.313	96.015	4.0518	3.9099	3.5975	2.8005
PRM2	NM_002762.2	3780224	16	11369652	-0.782	0.58156	-2.41	0.041582	0.618	4.06	23.883	0.36	97.303	4.4269	4.4759	3.1864	4.1527
LOC731002	XR_015554.1	2680431			-0.782	0.58156	-2.1	0.067796	0.646	3.98	16.925	0.453	98.704	4.3903	4.3527	4.1995	2.9788
MAGOHB	NM_018048.2	110348	12	10756800	-0.781	0.581963	-3.52	0.007434	0.566	5.21	70.066	0.205	88.787	5.6021	5.5954	4.8586	4.7763
LHFPL1	NM_178175.3	6840735	X	111874100	-0.781	0.581963	-3.34	0.00971	0.567	4.35	48.866	0.219	90.331	4.6205	4.8623	3.8635	4.0567
PLCH1	NM_014996.1	5910521	3	156680640	-0.781	0.581963	-3.3	0.010337	0.574	4.86	65.895	0.223	90.705	5.4032	5.0954	4.5455	4.3903
KRT18P13	XM_001726959.1	6110026	9	99502526	-0.781	0.581963	-2.79	0.022641	0.598	9.06	94.156	0.284	94.787	9.2135	9.6783	8.4068	8.924
LOC393078	XM_001732852.1	5390348			-0.781	0.581963	-1.93	0.088063	0.665	3.66	2.079	0.519	99.193	3.6036	4.4972	2.7459	3.7931
PRKAG2	NM_016203.3	6660414	7	151574124	-0.78	0.582367	-3.04	0.015369	0.587	4.02	20.133	0.249	92.712	4.1557	4.6589	3.707	3.5484
LOC649540	XM_943761.1	2970468			-0.78	0.582367	-3.03	0.015614	0.587	4.29	44.829	0.251	92.833	4.724	4.6457	4.1698	3.6398
SLC1A7	NM_006671.3	290669	1	53325531	-0.78	0.582367	-1.99	0.080386	0.658	4.04	21.598	0.492	99.018	4.0059	4.8435	3.1361	4.1527
ELL2	NM_012081.4	610270			-0.779	0.582771	-3.52	0.0074	0.566	5.64	74.184	0.202	88.55	6.0191	6.0341	5.2525	5.2429
GJA9	NM_030772.3	2350114	1	39339822	-0.779	0.582771	-3.35	0.009591	0.567	3.54	0.737	0.217	90.093	3.862	3.9985	3.0198	3.2818
C13orf26	NM_152325.1	4860612	13	30438409	-0.779	0.582771	-3.35	0.009599	0.567	4.25	41.428	0.217	90.108	4.6136	4.6716	3.7181	4.0082
	BX400436	3390386	7	142195463	-0.779	0.582771	-3.16	0.012744	0.584	4.17	34.238	0.235	91.669	4.3978	4.7209	3.6302	3.9306
SCARNA8	NR_003009.1	2600403	9	19063694	-0.779	0.582771	-2.83	0.021423	0.59	7.95	89.405	0.277	94.44	8.6781	8.0102	7.5459	7.5838
NT5DC4	XM_001715677.1	6130095			-0.778	0.583175	-3.09	0.014365	0.587	3.65	1.929	0.242	92.266	3.8922	4.1877	3.0649	3.4594
LOC646890	XR_017594.1	3710743	4	159418789	-0.778	0.583175	-2.92	0.018482	0.587	3.84	7.537	0.263	93.593	4.1127	4.3446	3.729	3.1716
ARSB	NM_000046.2	270215	5	78108988	-0.777	0.583579	-3.51	0.007557	0.566	5.69	74.659	0.202	88.486	6.0725	6.0852	5.326	5.2781
PROCR	NM_006404.3	290181	20	33228539	-0.777	0.583579	-3.49	0.00779	0.566	7.56	87.254	0.203	88.645	7.9742	7.9142	7.1211	7.2135
PPFIBP2	NM_003621.1	6900053	11	7631436	-0.777	0.583579	-3.46	0.008149	0.566	5.81	75.561	0.206	88.956	6.2014	6.1904	5.3359	5.5012
SYCP2	NM_014258.2	2690577	20	58439161	-0.777	0.583579	-2.27	0.052176	0.621	3.54	0.741	0.391	97.906	3.7767	4.0817	2.6409	3.6638
PTPN20B	NM_001042358.3	4610373	10	48737722	-0.777	0.583579	-1.46	0.181214	0.728	2.88	0.011	0.848	99.856	3.5645	2.9778	3.435	1.5541
PPP1R3C	NM_005398.4	6580593	10	93388548	-0.776	0.583984	-2.64	0.028849	0.609	4	18.282	0.304	95.689	4.6771	4.0924	3.8734	3.344
GLYAT	NM_005838.3	5810053	11	58477811	-0.776	0.583984	-2.16	0.061508	0.636	4.26	42.131	0.422	98.387	4.3838	4.9133	4.384	3.3606
LOC652640	XM_945777.1	1050372			-0.775	0.584389	-3.41	0.008783	0.566	4.37	49.878	0.208	89.115	4.6892	4.8175	3.893	4.0646
CDC42EP5	NM_145057.2	3370730	19	59668026	-0.775	0.584389	-3.21	0.01195	0.583	4.65	61.822	0.227	91.027	4.9639	5.1166	4.0803	4.4494
PBK	NM_018492.2	3420554	8	27723197	-0.775	0.584389	-3.07	0.014797	0.587	9.04	94.091	0.242	92.242	9.5105	9.3364	8.4143	8.8821
CHD2	NM_001271.1	2030468	15	91366040	-0.775	0.584389	-2.02	0.076299	0.656	3.71	3.045	0.47	98.85	4.1705	4.0171	2.6879	3.9503
LOC100133565	XM_001724542.1	5340279			-0.773	0.585199	-3.45	0.008283	0.566	7.67	87.879	0.203	88.668	8.1264	7.9769	7.2578	7.2989
TNFRSF19	NM_018647.2	2100477	13	23141242	-0.773	0.585199	-2.98	0.016846	0.587	3.52	0.618	0.249	92.738	3.8922	3.9211	3.4083	2.8597
CPXM1	NM_019609.3	730577	20	2774820	-0.773	0.585199	-2.75	0.024251	0.603	5	67.866	0.283	94.743	5.4426	5.3243	4.2614	4.9589
	BE622355	540747	18	27906836	-0.773	0.585199	-2.38	0.043168	0.62	7.59	87.426	0.354	97.173	7.8178	8.1274	6.7436	7.6565
RTN1	NM_206852.1	990047	14	60097172	-0.773	0.585199	-2.22	0.056264	0.625	3.84	7.573	0.4	98.05	4.2924	4.1612	3.9985	2.9085
TNFRSF10B	NM_003842.3	2600463	8	22933755	-0.772	0.585605	-3.42	0.008675	0.566	8.86	93.479	0.205	88.808	9.3393	9.1494	8.4616	8.4828
USP20	NM_001008563.1	4670370	9	131683555	-0.772	0.585605	-3.3	0.010404	0.576	4.01	19.737	0.215	89.896	4.5098	4.2888	3.5157	3.7391
FAIM2	NM_012306.2	5270504	12	50260762	-0.772	0.585605	-3.26	0.011022	0.579	4.35	48.911	0.219	90.282	4.6576	4.8175	3.8112	4.1195
IL17RB	NM_018725.3	1070152	3	53874362	-0.772	0.585605	-2.98	0.016935	0.587	8.01	89.712	0.249	92.744	8.5957	8.1927	7.4343	7.8096
C2orf58	NM_173652.1	5570315	2	38262329	-0.772	0.585605	-2.64	0.028878	0.609	3.73	3.769	0.3	95.537	4.331	3.9099	3.0198	3.6767
NFATC2IP	XM_944125.1	6380136			-0.772	0.585605	-2.64	0.028972	0.609	4.43	53.818	0.3	95.533	4.6005	5.0418	4.3714	3.7273
LRP1	NM_002332.2	2710286	12	55892995	-0.771	0.586011	-3.12	0.013622	0.587	3.41	0.239	0.232	91.412	3.6398	3.9503	2.8616	3.1864
RBMS1	NM_002897.3	2470520	2	160839018	-0.771	0.586011	-3	0.016391	0.587	6.13	78.006	0.246	92.475	6.5168	6.512	5.4767	6.0099
LOC643009	XM_932195.1	510678	22	18747872	-0.771	0.586011	-2.41	0.041572	0.618	3.81	6.206	0.346	96.974	3.7445	4.6457	3.2889	3.5603
SMAD5	NM_005903.5	7560367	5	135517986	-0.77	0.586417	-3.13	0.013396	0.587	8.51	92.117	0.229	91.182	8.8353	8.9615	7.9197	8.338
CSDC2	NM_014460.2	3840349	22	40302546	-0.77	0.586417	-2.91	0.018931	0.587	4.89	66.403	0.256	93.176	5.2463	5.3112	4.2145	4.8035
	R59697	1500291	13	25877168	-0.77	0.586417	-2.58	0.031819	0.609	4.58	59.931	0.31	95.893	5.1582	4.7818	3.8359	4.5632
LOC646804	XM_929761.1	4880639	1	169312712	-0.77	0.586417	-2.57	0.032123	0.609	4.33	47.598	0.31	95.912	4.5019	4.9325	3.5975	4.2972
CCDC147	NM_001008723.1	580025	10	106139793	-0.77	0.586417	-2.5	0.036101	0.609	4.09	27.143	0.325	96.458	4.1025	4.8563	3.4891	3.9306
LOC653260	XM_927041.1	1980577	3	100879648	-0.769	0.586824	-3.46	0.008167	0.566	4.19	36.214	0.199	88.198	4.6136	4.5398	3.8452	3.7694
PDGFA	NM_033023.3	3840112	7	525213	-0.769	0.586824	-3.31	0.010149	0.573	4.4	51.801	0.211	89.443	4.9191	4.6457	3.971	4.0567
NCAM2	NM_004540.2	5080292	21	21832517	-0.769	0.586824	-2.23	0.055126	0.625	3.84	7.808	0.39	97.883	4.5748	3.8816	3.0481	3.8711
CDKN1B	NM_004064.2	1030348	12	12766376	-0.768	0.587231	-3.46	0.008098	0.566	7.13	84.696	0.198	87.982	7.5047	7.5332	6.7167	6.7851
LOC339902	XM_945300.2	2650438			-0.768	0.587231	-2.6	0.030851	0.609	3.76	4.406	0.303	95.649	3.7767	4.511	3.2167	3.5344
HDAC9	NM_014707.1	2480605	7	18672838	-0.768	0.587231	-2.24	0.054146	0.625	4.01	19.301	0.385	97.804	4.2508	4.5332	4.1375	3.1112
RBMY1F	NM_152585.1	20020	Y	24321323	-0.767	0.587638	-2.15	0.062924	0.636	3.85	7.836	0.414	98.258	4.6576	3.7984	3.0844	3.8376
LOC653748	XM_930502.1	2360008	7	153868734	-0.767	0.587638	-2.14	0.063135	0.637	3.69	2.784	0.415	98.283	3.8191	4.3375	3.8215	2.8005
C13orf30	NM_182508.1	3170288	13	42263444	-0.766	0.588046	-3.36	0.009487	0.567	3.78	5.058	0.204	88.768	4.0945	4.2305	3.3039	3.4891
LOC642035	XM_936105.1	4040086			-0.766	0.588046	-3.27	0.010803	0.579	5.3	71.053	0.212	89.545	5.8253	5.5387	4.8546	4.9782
ROPN1B	NM_001012337.1	1710390	3	125688094	-0.766	0.588046	-3.1	0.013991	0.587	4.66	62.069	0.229	91.175	4.8719	5.2182	4.4208	4.1368
SPAG1	NM_172218.1	6130601	8	101247224	-0.766	0.588046	-3.06	0.015	0.587	4.75	63.954	0.234	91.601	5.3507	4.9073	4.4544	4.2714
TXNDC2	NM_032243.5	940563	18	9875862	-0.766	0.588046	-1.94	0.086962	0.664	4.09	26.965	0.491	99.007	3.8105	5.1411	3.729	3.6903
FAM160B1	NM_020940.3	1340739	10	116624309	-0.765	0.588453	-3.06	0.014871	0.587	8	89.638	0.232	91.431	8.3251	8.4301	7.383	7.8429
MGC57359	XM_499348.3	2810431			-0.765	0.588453	-2.82	0.021698	0.593	4.1	27.435	0.263	93.6	4.6711	4.2888	3.971	3.4594
ATOH8	NM_032827.4	3840376	2	85868438	-0.765	0.588453	-2.62	0.029846	0.609	4.03	21.02	0.296	95.34	4.331	4.4899	4.026	3.2652
FGL1	NM_201552.1	4480463	8	17783856	-0.765	0.588453	-2.01	0.078039	0.656	4.06	23.512	0.461	98.785	3.8105	5.0677	3.6204	3.7273
RBM47	NM_001098634.1	4780600	4	40425558	-0.764	0.588861	-3.09	0.014173	0.587	7.52	87.04	0.228	91.088	7.9012	7.9067	6.9166	7.3635
LRIG1	NM_015541.2	5090408	3	66512493	-0.764	0.588861	-3.01	0.01615	0.587	4.57	59.467	0.238	91.918	4.7628	5.1411	4.3575	4.0177
ANTXR2	NM_058172.3	10685	4	81045984	-0.764	0.588861	-3.01	0.016159	0.587	6.46	80.411	0.238	91.906	6.6378	7.0522	5.9339	6.2279
CYorf14	NR_001544.1	7150066	Y	19494064	-0.764	0.588861	-2.41	0.041417	0.618	4	18.331	0.337	96.786	4.121	4.6377	3.232	3.9985
	M97723	3930537	7	142128129	-0.763	0.58927	-3.15	0.012946	0.587	3.61	1.389	0.221	90.43	4.1025	3.8816	3.3958	3.0628
AIPL1	NM_001033054.1	3610138	17	6327336	-0.763	0.58927	-3.07	0.014728	0.587	4.33	47.585	0.23	91.22	4.4824	4.9448	3.9509	3.9503
SGMS1	NM_147156.3	290358	10	52066938	-0.763	0.58927	-3.03	0.015633	0.587	4.69	62.8	0.234	91.635	4.8836	5.2616	4.153	4.4657
	DB082485	2750131	2	732671	-0.763	0.58927	-2.76	0.024	0.602	4.45	54.426	0.271	94.063	4.5019	5.1571	4.153	3.9802
LOC646405	NM_001126062.1	2120470			-0.763	0.58927	-2.35	0.045597	0.62	3.98	16.887	0.35	97.068	4.6576	4.0646	3.2167	3.9802
PABPC1L2B	NM_001042506.1	1400324	X	72141892	-0.763	0.58927	-1.89	0.0939	0.668	3.67	2.261	0.508	99.132	4.5019	3.6015	2.7711	3.807
LOC643357	XM_926688.1	290326	7	55767228	-0.762	0.589678	-3.42	0.008578	0.566	10.74	97.989	0.196	87.775	11.0727	11.163	10.3842	10.3269
EMILIN2	NM_032048.2	1190142	18	2891292	-0.762	0.589678	-3.26	0.010907	0.579	7.83	88.726	0.209	89.285	8.065	8.3613	7.4172	7.4851
NDRG4	NM_020465.2	2100433	16	57055152	-0.762	0.589678	-3.17	0.012658	0.584	4.2	37.054	0.218	90.223	4.3978	4.7691	3.8734	3.7694
LOC653108	XR_016129.1	1400543	21	13973082	-0.762	0.589678	-3.07	0.014737	0.587	5.83	75.705	0.229	91.184	6.0451	6.3692	5.2807	5.6087
TJP2	NM_201629.1	3120615	9	71059142	-0.762	0.589678	-2.96	0.017521	0.587	4.77	64.426	0.242	92.28	5.3188	4.9824	4.1772	4.5991
SORBS1	NM_015385.2	1990088	10	97101382	-0.762	0.589678	-2.77	0.02345	0.601	4.43	53.624	0.267	93.837	4.8238	4.801	3.7181	4.3829
PCDHGA2	NM_032009.1	510458	5	140700311	-0.762	0.589678	-2.49	0.036286	0.609	3.81	6.136	0.316	96.164	3.9306	4.4473	3.0844	3.7694
SP140	NM_001005176.1	870193	2	230811253	-0.761	0.590087	-3.43	0.008445	0.566	4.12	30.076	0.193	87.512	4.528	4.4829	3.729	3.7605
CNIH2	NM_182553.1	670398	11	65808112	-0.761	0.590087	-3.43	0.008529	0.566	6.11	77.89	0.194	87.629	6.4844	6.5036	5.7731	5.693
IKBIP	NM_153687.2	3170605	12	99018177	-0.761	0.590087	-3.39	0.009004	0.566	5.13	69.293	0.197	87.91	5.4911	5.5282	4.6739	4.8238
	CR627122	4070193	X	131333820	-0.761	0.590087	-3.3	0.010291	0.574	5.14	69.446	0.205	88.815	5.6271	5.419	4.6799	4.8435
TMSB15A	NM_021992.2	1740291	X	101768868	-0.761	0.590087	-3.26	0.010977	0.579	8.97	93.86	0.209	89.253	9.3465	9.3501	8.4347	8.7395
KIAA0895	NM_015314.2	3890164	7	36364797	-0.761	0.590087	-3.03	0.015544	0.587	6.41	80.085	0.232	91.444	6.8169	6.7717	6.2732	5.7925
FHL1	NM_001449.3	4640446	X	135120766	-0.761	0.590087	-2.93	0.018374	0.587	5.98	76.897	0.245	92.446	6.612	6.113	5.4767	5.7256
CD83	NM_004233.3	6620026	6	14136299	-0.761	0.590087	-2.91	0.018881	0.587	6.93	83.413	0.247	92.596	7.3439	7.2711	6.2642	6.8286
LOC253724	XM_942551.1	6550497			-0.76	0.590496	-3.42	0.008671	0.566	3.97	16.434	0.194	87.663	4.331	4.3778	3.6398	3.5484
TUBB	NM_178014.2	3610259	6	30691647	-0.76	0.590496	-3.25	0.011238	0.581	9.82	96.341	0.209	89.297	10.2669	10.1422	9.3001	9.5888
GPR162	NM_019858.1	3520598	12	6806759	-0.76	0.590496	-3.23	0.011586	0.581	8.26	90.94	0.211	89.49	8.5775	8.6983	7.7227	8.0325
IMPG1	NM_001563.2	3520609	6	76715227	-0.76	0.590496	-3.14	0.013163	0.587	4.05	23.186	0.219	90.269	4.2351	4.6305	3.6949	3.6514
GEM	NM_181702.1	1170246	8	95331564	-0.76	0.590496	-3	0.016329	0.587	5.33	71.324	0.234	91.603	5.4943	5.919	4.815	5.0791
SUMO2	NM_001005849.1	2600066	17	73178914	-0.76	0.590496	-2.89	0.019317	0.587	10.69	97.934	0.248	92.63	11.1022	11.0277	10.0199	10.5906
COL11A1	NM_080629.2	5560739	1	103343309	-0.76	0.590496	-2.27	0.051756	0.621	4.63	61.197	0.367	97.457	4.9942	5.0261	4.7615	3.7391
ITPKA	NM_002220.1	6560546	15	39582984	-0.759	0.590906	-3.35	0.009579	0.567	7.78	88.45	0.199	88.11	8.0877	8.2385	7.3386	7.4699
ZNF800	NM_176814.3	7150682	7	127010642	-0.759	0.590906	-3.32	0.010095	0.573	7	83.854	0.202	88.488	7.3575	7.3962	6.4995	6.7366
TRIOBP	NM_138632.2	2900246	22	36485654	-0.759	0.590906	-3.29	0.01042	0.576	6.93	83.43	0.204	88.702	7.3624	7.2549	6.429	6.6699
FOXC1	NM_001453.1	2760079	6	1557280	-0.759	0.590906	-3.23	0.011443	0.581	7.4	86.329	0.21	89.342	7.9046	7.6583	6.9178	7.126
LOC649910	XM_938993.1	3710477			-0.759	0.590906	-3.16	0.012777	0.585	4.16	32.881	0.216	89.985	4.724	4.3446	3.7694	3.7817
EDN1	NM_001955.2	7040386	6	12404601	-0.759	0.590906	-2.84	0.020893	0.59	4.91	66.602	0.254	93.034	5.0665	5.5111	4.3214	4.7374
FLJ35785	XR_017720.1	2070634	15	20806683	-0.759	0.590906	-2.54	0.033856	0.609	4.15	32.523	0.304	95.685	4.5558	4.5051	3.3618	4.1805
LOC100128655	XM_001722497.1	1440523			-0.759	0.590906	-2.52	0.035067	0.609	3.95	14.766	0.308	95.854	4.5932	4.0732	3.2472	3.9011
ANKRD23	NM_144994.6	3520195	2	96867550	-0.759	0.590906	-2.35	0.045466	0.62	3.72	3.328	0.344	96.943	4.0945	4.1014	2.8616	3.8173
DNAJC21	NM_001012339.2	6060168	5	34958712	-0.759	0.590906	-1.69	0.127686	0.692	3.76	4.336	0.612	99.545	3.6648	4.6093	4.0164	2.7403
E2F2	NM_004091.2	5340338	1	23832967	-0.758	0.591316	-3.14	0.01318	0.587	8.39	91.59	0.218	90.148	8.9356	8.6068	7.9042	8.1217
TFCP2L1	NM_014553.1	6510240	2	121695121	-0.758	0.591316	-3.01	0.016102	0.587	4.88	66.183	0.231	91.359	5.0276	5.4852	4.413	4.5843
LOC340096	XM_293943.2	7610743	5	17544434	-0.758	0.591316	-2.31	0.048641	0.62	3.76	4.37	0.354	97.182	4.4269	3.8485	3.78	2.9788
A1BG	NM_130786.2	2570615	19	63548541	-0.758	0.591316	-2.11	0.066484	0.642	4.23	39.097	0.412	98.234	5.0968	4.1119	3.5501	4.1436
ZSWIM3	XM_001132374.1	4810280			-0.758	0.591316	-1.99	0.080397	0.658	4.34	48.267	0.457	98.751	5.0421	4.3993	4.5057	3.4194
GSR	NM_000637.2	4540392	8	30655990	-0.757	0.591726	-3.35	0.009584	0.567	4.7	62.952	0.197	87.966	5.1162	5.0361	4.4062	4.2311
LOC387882	NM_207376.1	5810743	12	104288777	-0.757	0.591726	-3.22	0.011635	0.581	9.11	94.336	0.209	89.249	9.4366	9.5354	8.5746	8.8829
ZNF582	NM_144690.1	5670253	19	61586610	-0.757	0.591726	-3.19	0.012184	0.583	4.29	44.807	0.211	89.498	4.751	4.595	4.0717	3.7605
	AK125357	70288	1	232933773	-0.757	0.591726	-2.96	0.017513	0.587	4.02	20.622	0.237	91.851	4.6576	4.1464	3.5866	3.7036
LOC153561	NM_207331.2	3060524	5	69805952	-0.757	0.591726	-2.83	0.021423	0.59	4.7	63.005	0.254	93.038	4.8329	5.3243	4.5057	4.1368
LOC100129463	XM_001716195.1	1770139			-0.757	0.591726	-1.88	0.095731	0.669	4.02	20.586	0.504	99.115	4.4335	4.3696	4.3293	2.9598
MDM2	NM_002392.2	4150113	12	67488444	-0.756	0.592136	-3.19	0.012201	0.583	4.47	55.447	0.211	89.445	5.0182	4.6763	4.0624	4.1195
LOC652298	XM_941716.1	2370524			-0.756	0.592136	-1.38	0.204412	0.74	3.76	4.465	0.889	99.875	3.8734	4.4062	4.3714	2.3953
ZSWIM2	NM_182521.2	6860538	2	187692333	-0.755	0.592546	-3.22	0.011735	0.582	3.81	6.231	0.207	89.105	4.0782	4.2979	3.5501	3.3152
ST3GAL2	NM_006927.3	7160292	16	70415375	-0.755	0.592546	-3.11	0.013752	0.587	5.69	74.654	0.218	90.17	6.17	5.9655	5.4879	5.1368
MAP1LC3A	NM_181509.1	1010079	20	32601383	-0.755	0.592546	-2.63	0.029127	0.609	4.01	19.288	0.282	94.696	4.0157	4.7554	3.5975	3.6638
	BC035064	4880753	3	32253623	-0.754	0.592957	-3.39	0.009008	0.566	4.48	55.978	0.191	87.244	4.9062	4.8081	4.1036	4.1022
CHST12	NM_018641.3	1710546	7	2440612	-0.754	0.592957	-3.27	0.010851	0.579	5.2	70.015	0.201	88.463	5.7125	5.4477	4.8091	4.8435
LOC643045	XM_931258.1	5390075	1	33124517	-0.754	0.592957	-3.07	0.014611	0.587	4.33	47.64	0.22	90.405	4.85	4.5693	3.7922	4.1195
SNORD107	NR_001293.1	1230491	15	22778234	-0.754	0.592957	-2.59	0.031115	0.609	4.27	43.236	0.288	94.969	4.4888	4.8129	4.2458	3.5484
CASP8	NM_033355.3	1050092	2	201849873	-0.754	0.592957	-2.42	0.040855	0.618	4.43	53.492	0.323	96.386	4.9062	4.7051	4.4872	3.616
LOC100133270	XM_001725241.1	540669	4	132897317	-0.754	0.592957	-2.11	0.066885	0.644	4.17	33.825	0.408	98.181	4.5748	4.511	3.2167	4.3604
BMS1	NM_014753.2	5340392	10	42632822	-0.754	0.592957	-1.73	0.119951	0.689	3.52	0.631	0.577	99.462	4.0605	3.7409	2.4019	3.8922
BHLHB9	NM_030639.1	7210546	X	101893766	-0.752	0.59378	-3.29	0.01054	0.576	5.74	75.057	0.198	88.05	6.0359	6.1996	5.453	5.2781
LOC649676	XM_943839.1	4570097			-0.752	0.59378	-3.11	0.013838	0.587	3.86	8.579	0.215	89.877	4.4335	4.0355	3.4761	3.4891
JPH2	NM_175913.3	4040722	20	42805559	-0.752	0.59378	-2.9	0.019166	0.587	4.09	26.273	0.24	92.065	4.5792	4.3446	3.4594	3.9596
LOC644846	XM_932442.1	4670615	X	135549501	-0.751	0.594192	-3.4	0.008927	0.566	3.97	15.738	0.188	86.814	4.3452	4.3375	3.5866	3.5937
LOC650611	XM_940706.1	2450482			-0.751	0.594192	-2.85	0.020607	0.587	4.37	50.046	0.245	92.429	4.888	4.6019	3.7399	4.2471
ZNF705A	NM_001004328.1	6650437	12	8223673	-0.751	0.594192	-2.6	0.030544	0.609	3.91	11.721	0.283	94.76	4.6646	3.9099	3.5377	3.5344
LOC645563	XM_928579.1	6650445	17	54764925	-0.751	0.594192	-2.47	0.037493	0.611	4.38	50.738	0.307	95.814	4.3387	5.1747	4.0717	3.94
LOC649812	XM_941337.1	7160241			-0.751	0.594192	-1.79	0.109584	0.68	3.37	0.152	0.539	99.303	3.4452	4.0355	3.6514	2.3265
ASAP2	NM_003887.2	2750674	2	9545233	-0.75	0.594604	-3.35	0.009592	0.567	6.08	77.631	0.191	87.212	6.4622	6.4393	5.6296	5.7718
MIR374A	NR_030785.1	6960296			-0.75	0.594604	-3.19	0.012293	0.583	3.92	12.166	0.205	88.829	4.1705	4.414	3.6514	3.4341
MIR218-1	NR_029631.1	2360093			-0.75	0.594604	-3.12	0.013712	0.587	4.01	19.337	0.212	89.589	4.5618	4.2047	3.707	3.5603
LRRC58	XM_938862.2	5340059			-0.75	0.594604	-2.95	0.017821	0.587	5.66	74.358	0.232	91.419	5.9792	6.0824	5.0283	5.5324
CLDN9	NM_020982.2	6060661	16	3004266	-0.75	0.594604	-2.91	0.01881	0.587	3.85	8.325	0.236	91.724	3.9878	4.47	3.5975	3.3606
ZAN	NM_003386.1	4040414	7	100229531	-0.75	0.594604	-2.77	0.023497	0.601	3.94	13.512	0.255	93.083	4.0349	4.5886	3.7181	3.4058
GP9	NM_000174.2	1050292	3	130263874	-0.75	0.594604	-2.53	0.034491	0.609	4.03	21.509	0.296	95.344	4.4956	4.3214	4.0521	3.2652
OR12D3	NM_030959.2	5560753	6	29449795	-0.75	0.594604	-2.48	0.037036	0.61	4.33	47.28	0.305	95.698	4.6771	4.7285	4.3714	3.5344
ABCG2	NM_004827.2	7160220	4	89230773	-0.75	0.594604	-2.47	0.037909	0.612	3.59	1.148	0.307	95.812	4.3668	3.5625	3.35	3.0801
CLEC4A	NM_194448.1	4050202	12	8182336	-0.75	0.594604	-1.96	0.08399	0.662	3.99	17.857	0.456	98.74	4.2433	4.4899	2.9935	4.2388
LOC283481	XM_001133584.1	6840053			-0.749	0.595016	-3.34	0.009748	0.567	3.77	4.774	0.191	87.235	4.1375	4.1534	3.3187	3.4737
LY6K	NM_017527.2	1340390	8	143782292	-0.749	0.595016	-3.16	0.012738	0.584	4.17	34.695	0.206	88.999	4.4888	4.6093	3.961	3.6398
ANG	NM_001097577.1	3890484	14	20231551	-0.749	0.595016	-3.15	0.012937	0.587	6.05	77.424	0.208	89.166	6.4251	6.4292	5.501	5.8548
RAB23	NM_016277.3	3930047	6	57162268	-0.749	0.595016	-2.84	0.021014	0.59	5.59	73.748	0.244	92.386	6.0451	5.8782	4.9321	5.4928
LOC641931	XM_935951.1	1990192			-0.749	0.595016	-2.82	0.021683	0.593	3.94	13.387	0.246	92.547	4.1638	4.4544	3.8215	3.2992
C3orf37	NM_001006109.1	1570010	3	128998003	-0.749	0.595016	-2.59	0.031086	0.609	4.47	55.673	0.283	94.745	4.6074	5.0895	4.3915	3.807
GPR83	NM_016540.2	110398	11	93750259	-0.749	0.595016	-2.26	0.05287	0.623	4.7	63.105	0.356	97.226	4.8275	5.3292	4.7663	3.8922
LOC100134655	XM_001718700.1	7050044	7	40027829	-0.749	0.595016	-1.9	0.093185	0.667	3.84	7.626	0.483	98.96	3.5755	4.8563	3.6514	3.2818
ITGB5	NM_002213.3	2650114	3	125964619	-0.748	0.595428	-3.31	0.010196	0.574	9.11	94.328	0.193	87.396	9.4409	9.5168	8.6436	8.8183
CCDC126	NM_138771.3	7000332	7	23649839	-0.748	0.595428	-3.29	0.010441	0.576	5.3	71.07	0.194	87.546	5.6021	5.7499	4.8546	5.0022
TMED5	NM_016040.3	4210309	1	93617762	-0.748	0.595428	-3.13	0.013464	0.587	8.54	92.236	0.209	89.302	8.7365	9.0998	8.1356	8.2053
LOC649993	XM_939079.1	20494			-0.748	0.595428	-3	0.016463	0.587	3.93	13.25	0.223	90.701	4.3838	4.2305	3.3369	3.7817
SMARCC2	NM_003075.2	6840561	12	54844476	-0.748	0.595428	-2.53	0.034102	0.609	4.38	50.967	0.292	95.149	4.8053	4.7123	4.4062	3.616
LOC650909	XM_939995.2	5420521			-0.748	0.595428	-2.28	0.050675	0.621	5.04	68.347	0.347	97.017	5.7325	5.0895	4.2918	5.0351
CTXN3	NM_001048252.1	6020088	5	127021862	-0.747	0.595841	-2.18	0.059484	0.632	3.91	11.609	0.374	97.61	4.6964	3.8703	3.2023	3.8711
	DB069686	2450176	10	3297075	-0.746	0.596254	-2.78	0.023015	0.599	4.1	27.264	0.249	92.693	4.7763	4.1612	3.707	3.7391
	BU838786	2340414	10	82271034	-0.746	0.596254	-2.53	0.034256	0.609	4.42	53.029	0.29	95.09	4.5748	5.0088	4.3778	3.7146
CLUAP1	NM_024793.1	2230129	16	3527168	-0.745	0.596668	-3.2	0.012026	0.583	5.62	74.07	0.2	88.264	5.9166	6.069	5.3746	5.1208
FAM126B	NM_173822.2	4880110	2	201552981	-0.745	0.596668	-3.07	0.014656	0.587	5.59	73.81	0.212	89.598	6.1588	5.7752	5.2865	5.1578
LOC399965	XR_036921.1	3520333			-0.745	0.596668	-3.06	0.01483	0.587	6.97	83.701	0.213	89.678	7.1421	7.5415	6.5501	6.644
COL18A1	NM_130445.2	6590181	21	45649535	-0.745	0.596668	-3.01	0.016093	0.587	4.42	52.967	0.219	90.314	4.9787	4.6019	4.1698	3.9203
OLIG1	NM_138983.1	2030403	21	33366204	-0.745	0.596668	-2.9	0.019076	0.587	3.85	7.98	0.232	91.4	4.4412	3.9985	3.6204	3.3297
SPHAR	NM_006542.2	4010368	1	227507677	-0.745	0.596668	-2.86	0.020393	0.587	5.35	71.633	0.238	91.897	5.446	6.0069	4.9782	4.9842
CTSL1	NM_001912.3	4150189	9	89535894	-0.745	0.596668	-2.75	0.024383	0.603	8.87	93.53	0.253	92.971	9.4366	9.0501	8.2443	8.7531
PSMA8	NM_001025097.1	7040129	18	22026991	-0.745	0.596668	-2.58	0.031504	0.609	3.67	2.242	0.28	94.595	4.3978	3.6855	3.4207	3.1716
KRTAP2-1	XM_926554.2	6020382	17	36456760	-0.745	0.596668	-2.23	0.054816	0.625	4.39	51.487	0.357	97.243	4.5792	4.9528	4.4936	3.5484
CC2D1B	NM_032449.1	730497	1	52816354	-0.745	0.596668	-2.09	0.068911	0.647	5.03	68.29	0.401	98.063	5.5825	5.2271	5.2008	4.1195
LOC100133301	XM_001721533.1	6510181	1	16738363	-0.744	0.597082	-3.29	0.010534	0.576	4.01	19.068	0.191	87.233	4.3082	4.4473	3.5633	3.7036
SNRNP48	NM_152551.3	3190538	6	7556649	-0.744	0.597082	-3.2	0.012076	0.583	4.08	25.197	0.199	88.137	4.5558	4.3375	3.8009	3.6047
UBL7	NM_032907.3	1240307	15	74753380	-0.744	0.597082	-3.11	0.013785	0.587	5.99	76.996	0.208	89.124	6.3241	6.4074	5.4407	5.8022
CALCR	NM_001742.2	110239	7	92892206	-0.744	0.597082	-3.02	0.015945	0.587	3.99	17.397	0.217	90.085	4.5019	4.2132	3.4461	3.7817
PRR19	NM_199285.2	3170255	19	42814609	-0.744	0.597082	-2.26	0.052533	0.622	4.71	63.323	0.348	97.034	4.8238	5.3502	3.9236	4.7633
NBPF3	XM_939326.1	1690594			-0.743	0.597496	-3.11	0.013867	0.587	4.12	29.375	0.207	89.024	4.5098	4.47	3.5633	3.9306
SLC26A11	XM_001132495.1	7040647			-0.743	0.597496	-3.03	0.015612	0.587	6.1	77.809	0.215	89.918	6.5146	6.4309	5.5175	5.941
PALMD	NM_017734.3	2140082	1	99932764	-0.743	0.597496	-2.93	0.018272	0.587	4.33	47.172	0.226	90.953	4.4754	4.9198	3.8359	4.0739
RP9P	NR_003500.1	4490603	7	32956561	-0.743	0.597496	-2.92	0.018497	0.587	6.15	78.148	0.228	91.093	6.6363	6.4074	5.5495	6.0074
ZMIZ1	NM_020338.2	2450131	10	80745948	-0.743	0.597496	-2.91	0.01888	0.587	7.69	88.021	0.229	91.199	8.1355	7.9909	7.0695	7.5701
DUSP4	NM_001394.5	2650041	8	29263496	-0.743	0.597496	-2.81	0.022015	0.595	5.56	73.505	0.242	92.247	5.9446	5.919	4.8943	5.4831
HOXA10	NM_018951.3	5270537	7	27213383	-0.742	0.59791	-2.55	0.033427	0.609	4.32	46.609	0.283	94.777	4.4269	4.9528	4.2311	3.6638
ZNF563	NM_145276.1	2000041	19	12289874	-0.742	0.59791	-2.52	0.035114	0.609	4.5	56.668	0.289	95.035	4.7164	5.0201	3.7588	4.4936
LOC729569	XM_001130645.1	7570605	5	178883665	-0.742	0.59791	-2.27	0.051872	0.621	4.06	23.796	0.344	96.953	4.2992	4.5618	4.1612	3.2152
MEST	NM_177524.1	3520338	7	129913417	-0.741	0.598324	-3.3	0.010333	0.574	5.56	73.511	0.187	86.691	5.8637	5.9998	5.1501	5.2314
SPAST	NM_199436.1	460333	2	32236050	-0.741	0.598324	-3.29	0.010475	0.576	5.67	74.466	0.188	86.738	6.0547	6.0197	5.2138	5.3795
KCMF1	XM_001133393.1	3290360			-0.741	0.598324	-3.23	0.011539	0.581	5.94	76.6	0.194	87.599	6.1882	6.4349	5.5418	5.5984
LOC643451	XM_931554.1	2760561	9	45327817	-0.741	0.598324	-3.23	0.011564	0.581	4.4	51.794	0.193	87.529	4.724	4.8129	4.1453	3.9099
	BU665282	630615	15	60387763	-0.741	0.598324	-3.16	0.012719	0.584	4.76	64.254	0.199	88.181	5.2872	4.9753	4.3983	4.3829
RRAGC	NM_022157.2	2810112	1	39305190	-0.741	0.598324	-3.02	0.015939	0.587	5.85	75.844	0.215	89.873	6.2372	6.202	5.2611	5.6952
CACNG5	NM_014404.1	3120377	17	62311293	-0.741	0.598324	-2.65	0.028434	0.609	4.07	24.791	0.264	93.655	4.528	4.3527	3.3618	4.037
C8orf79	NM_001039462.1	7050446	8	12909419	-0.741	0.598324	-2.63	0.029371	0.609	4.05	23.156	0.267	93.835	4.376	4.47	4.0349	3.3297
DEFB112	NM_001037498.1	5310167	6	50119455	-0.741	0.598324	-2.56	0.032877	0.609	4.51	57.219	0.28	94.578	4.9125	4.85	4.5203	3.7605
LOC648362	XM_943290.1	1470730			-0.741	0.598324	-2.3	0.049367	0.62	3.68	2.456	0.334	96.731	3.9878	4.1119	2.8364	3.7817
ELANE	NM_001972.2	7650497	19	807179	-0.741	0.598324	-2.17	0.061119	0.636	4.11	28.907	0.371	97.54	4.8943	4.0732	4.0803	3.4058
LOC100132184	XR_039315.1	4670687	1	22451	-0.741	0.598324	-1.72	0.122423	0.69	4.07	24.274	0.561	99.394	4.2683	4.6019	4.4281	2.9598
	AI916618	6040019	4	153347826	-0.74	0.598739	-3.31	0.010118	0.573	4.02	20.387	0.185	86.46	4.3978	4.384	3.5866	3.7146
CXorf30	XR_000668.2	360671			-0.739	0.599155	-3.26	0.011026	0.579	4.06	23.751	0.189	86.922	4.3387	4.5177	3.6398	3.7391
LOC100132377	XM_001722278.1	1690138	X	849431	-0.739	0.599155	-3.25	0.011125	0.58	4.3	45.591	0.189	86.962	4.6074	4.7418	3.854	4.0177
WDFY1	NM_020830.3	3400612	2	224740138	-0.739	0.599155	-3.19	0.012166	0.583	8.4	91.647	0.195	87.75	8.793	8.7525	7.8949	8.1717
	AI692977	4010246	12	117793194	-0.738	0.59957	-3.22	0.011605	0.581	4.73	63.6	0.191	87.218	5.1359	5.0613	4.4747	4.2471
SNX16	NM_022133.2	940324	8	82874531	-0.738	0.59957	-3.22	0.011634	0.581	6.11	77.856	0.191	87.263	6.5749	6.3769	5.6678	5.8079
C1orf55	NM_152608.3	1010435	1	226170900	-0.738	0.59957	-2.83	0.021383	0.59	7.69	87.985	0.234	91.618	7.8376	8.2718	7.1381	7.4956
C21orf81	NM_153750.1	1430484	21	14248286	-0.738	0.59957	-2.65	0.028442	0.609	3.93	12.926	0.261	93.509	4.331	4.2647	3.9035	3.2152
LOC651280	XM_944575.1	6350328			-0.738	0.59957	-2.5	0.036234	0.609	4.16	33	0.288	94.963	4.2132	4.837	3.5377	4.037
C5orf4	NM_032385.3	1690240	5	154198595	-0.738	0.59957	-2.19	0.059096	0.631	4.05	22.621	0.361	97.315	4.5414	4.2888	3.1746	4.1805
LOC257039	XM_940826.3	2480392			-0.737	0.599986	-3.25	0.011106	0.58	4	18.619	0.188	86.752	4.3452	4.3921	3.729	3.5344
	CD640673	6840477	5	140085938	-0.737	0.599986	-2.83	0.021393	0.59	7.19	85.056	0.234	91.573	7.6266	7.4881	7.0919	6.548
PEX5L	NM_016559.1	4560068	3	181001294	-0.736	0.600402	-3.26	0.010936	0.579	4.09	26.726	0.186	86.528	4.3903	4.526	3.6629	3.7817
KIAA1712	NM_030633.1	1470181	4	175489879	-0.736	0.600402	-3.21	0.011776	0.582	4.49	56.266	0.19	87.123	4.8719	4.837	4.2382	3.9985
SYPL1	NM_006754.2	3170360	7	105732278	-0.736	0.600402	-3.04	0.015487	0.587	8.93	93.744	0.208	89.155	9.1089	9.4834	8.4838	8.6362
ILDR2	NM_199351.1	5690048	1	166888280	-0.736	0.600402	-2.7	0.026136	0.609	4.38	50.696	0.25	92.801	4.7763	4.7209	4.3351	3.6903
SNORD108	NR_001292.1	2230066	15	22783186	-0.736	0.600402	-2.64	0.028674	0.609	3.48	0.443	0.26	93.403	3.8402	3.862	2.7711	3.4594
IGLL3	NM_001013618.1	670170	22	24044111	-0.736	0.600402	-2.45	0.039076	0.615	4.57	59.535	0.295	95.3	5.1737	4.7051	4.5455	3.862
PPARD	NM_177435.1	7510682	6	35500624	-0.735	0.600818	-3.31	0.010106	0.573	4.39	51.208	0.18	85.681	4.7303	4.7818	4.0349	4.0082
LLGL2	XM_946149.1	5700040			-0.735	0.600818	-3.27	0.010748	0.579	4.34	48.356	0.184	86.291	4.6319	4.7896	3.971	3.9802
	BX344951	1690246	5	96793280	-0.735	0.600818	-3.01	0.016134	0.587	4.09	26.383	0.21	89.34	4.2924	4.6161	3.854	3.5846
	BX107598	7650719	4	166647567	-0.735	0.600818	-2.92	0.018502	0.587	4.8	65.012	0.22	90.369	5.0022	5.3417	4.2614	4.6122
SLC17A6	NM_020346.1	3190040	11	22357394	-0.735	0.600818	-2.6	0.0307	0.609	3.8	5.822	0.265	93.71	3.8292	4.5051	3.5501	3.3152
RAE1	NM_003610.3	4780541	20	55359815	-0.735	0.600818	-2.58	0.031682	0.609	6.26	78.999	0.27	93.989	6.5609	6.6965	5.5336	6.253
SNORD124	NR_003692.1	5050685	17	35437366	-0.734	0.601235	-3.27	0.010888	0.579	3.69	2.721	0.184	86.287	4.1375	3.9802	3.35	3.2992
LOC646098	XM_933399.2	4070707	19	55980881	-0.734	0.601235	-2.18	0.059826	0.632	3.87	8.895	0.358	97.245	4.1025	4.3604	3.9985	2.9972
GSTT2B	NM_001080843.2	6980504	22	24300844	-0.733	0.601652	-3.18	0.012438	0.583	6.18	78.396	0.191	87.214	6.5591	6.5297	5.6789	5.9437
LOC100130431	XM_001724860.1	2190747	11	85457751	-0.733	0.601652	-3.15	0.013023	0.587	3.7	2.839	0.194	87.612	4.0253	4.1014	3.1864	3.4737
LOC645620	XM_928633.2	2340379	15	50010048	-0.733	0.601652	-2.9	0.019196	0.587	4.3	44.92	0.22	90.398	4.7303	4.595	4.1698	3.6903
CPA4	NM_016352.2	520682	7	129750916	-0.733	0.601652	-2.63	0.029455	0.609	5.81	75.569	0.259	93.392	6.1227	6.2269	5.7845	5.0988
LOC646764	XM_929715.1	3180168	19	20588040	-0.733	0.601652	-2.08	0.069921	0.649	3.58	1.088	0.388	97.845	3.8191	4.0817	2.6733	3.7605
TGIF1	NM_170695.2	3140369	18	3447640	-0.732	0.602069	-2.86	0.020498	0.587	8.3	91.16	0.225	90.832	8.8149	8.5213	7.7177	8.1547
CNTN3	NM_020872.1	1660367	3	74399153	-0.732	0.602069	-2.51	0.035201	0.609	4.16	33.465	0.278	94.478	4.1476	4.9073	3.729	3.862
TJP1	NM_003257.3	5700504	15	29992875	-0.731	0.602486	-3.29	0.010425	0.576	7.52	87.015	0.179	85.45	7.8719	7.8949	7.1861	7.1192
LOC729993	XM_001131913.2	2690170			-0.731	0.602486	-3.24	0.01136	0.581	4.27	42.582	0.183	86.164	4.5866	4.6763	3.8215	3.9802
MIR506	NR_030233.1	2070709			-0.731	0.602486	-3.15	0.013016	0.587	4.07	24.641	0.192	87.335	4.2924	4.5758	3.729	3.6767
GMNN	NM_015895.3	4830373	6	24785941	-0.73	0.602904	-3.23	0.011585	0.581	8.54	92.238	0.184	86.246	8.8455	8.9735	8.2539	8.1051
DKFZp667F0711	XM_001723851.1	650440			-0.73	0.602904	-3.17	0.012543	0.584	3.69	2.691	0.188	86.858	4.121	3.9886	3.435	3.2152
KBTBD8	NM_032505.1	6370523	3	67144173	-0.73	0.602904	-3.02	0.015975	0.587	5.96	76.765	0.204	88.715	6.2094	6.4491	5.4407	5.7588
NT5DC3	NM_001031701.1	3370433	12	102695658	-0.73	0.602904	-2.31	0.048809	0.62	4.22	38.411	0.319	96.295	4.4609	4.7051	3.4083	4.2972
LOC727732	XM_001124828.1	3450392	17	20132	-0.729	0.603322	-3.19	0.012197	0.583	4.26	41.839	0.186	86.564	4.515	4.7285	3.8452	3.94
MTMR11	NM_181873.2	3890138	1	148167309	-0.729	0.603322	-2.96	0.017556	0.587	6.98	83.748	0.21	89.359	7.4681	7.2141	6.4308	6.7941
LOC100131009	XM_001716640.1	2470138			-0.729	0.603322	-2.52	0.03471	0.609	4.76	64.191	0.273	94.173	5.0871	5.1571	4.0164	4.7702
LOC728825	XM_001128769.1	7100014	X	114859890	-0.728	0.60374	-2.72	0.025222	0.606	5.91	76.325	0.238	91.957	6.0095	6.5349	5.3904	5.699
EPS8L3	NM_139053.1	3710184	1	110292861	-0.728	0.60374	-2.64	0.028634	0.609	4.18	35.165	0.251	92.875	4.6136	4.4759	3.4891	4.1436
LOC390671	XR_037351.1	7510747			-0.728	0.60374	-2.56	0.032563	0.609	5.39	71.91	0.264	93.674	6.0858	5.4153	4.884	5.1613
	CD693563	2120746	7	142004890	-0.728	0.60374	-2.47	0.037622	0.611	3.86	8.827	0.281	94.673	3.9211	4.5332	3.7507	3.2472
CA12	NM_001218.3	150474	15	63615818	-0.728	0.60374	-2.12	0.065194	0.641	5.42	72.23	0.367	97.444	5.4356	6.1363	4.6552	5.4599
LOC729703	XM_001131089.1	1690491	5	17610627	-0.728	0.60374	-2.12	0.06559	0.641	4.17	34.452	0.367	97.461	4.0157	5.0562	3.6855	3.9306
NBPF22P	NR_003719.1	4760719	5	85592886	-0.727	0.604159	-3.19	0.012173	0.583	3.59	1.154	0.184	86.312	4.0157	3.8922	3.3187	3.1349
LOC728539	XM_001127707.2	6650441	9	66239282	-0.727	0.604159	-3.16	0.012876	0.587	4.13	30.838	0.187	86.721	4.3838	4.6093	3.8359	3.7036
HAPLN3	NM_178232.2	4900086	15	89420751	-0.727	0.604159	-3.14	0.013197	0.587	4.86	65.965	0.189	86.884	5.1396	5.3112	4.6074	4.3903
GLIPR1L1	NM_152779.2	870681	12	74050137	-0.727	0.604159	-2.95	0.017793	0.587	4.17	34.755	0.209	89.266	4.4824	4.595	3.5975	4.0266
	BG325888	3310162	5	192818	-0.727	0.604159	-1.91	0.091805	0.667	4.51	57.227	0.443	98.605	5.4356	4.3141	3.854	4.4412
	CA867598	5340360	X	131180214	-0.726	0.604578	-3.2	0.012103	0.583	4.35	49.023	0.183	86.138	4.6771	4.7554	4.0882	3.8922
ADD3	NM_016824.3	1010477	10	111872576	-0.726	0.604578	-3.17	0.012629	0.584	5.91	76.302	0.186	86.532	6.3787	6.1596	5.5984	5.4871
LOC654000	XM_940558.1	6280110			-0.726	0.604578	-2.49	0.036336	0.609	3.84	7.37	0.274	94.286	4.069	4.3293	3.8359	3.1112
TNRC6C	NM_018996.2	770301	17	73612212	-0.726	0.604578	-2.09	0.068515	0.647	3.88	9.983	0.373	97.591	4.2207	4.2733	2.9769	4.0646
LOC100131193	NR_024580.1	3460044	9	139698478	-0.725	0.604997	-3.22	0.011674	0.581	4.33	47.477	0.18	85.656	4.6386	4.7475	4.0349	3.9011
DNAJB14	NM_001031723.1	1710240	4	101041051	-0.725	0.604997	-3.1	0.01405	0.587	6.14	78.11	0.192	87.299	6.3818	6.6333	5.8744	5.6897
PRKAG2	NM_016203.3	3360347	7	151573592	-0.725	0.604997	-2.85	0.02078	0.588	3.82	6.676	0.219	90.28	4.1877	4.1785	3.2023	3.7146
PKP1	NM_000299.2	1440441	1	199555577	-0.725	0.604997	-2.79	0.022915	0.599	4.31	45.881	0.227	91.057	4.86	4.4829	3.7399	4.1527
UBQLNL	NM_145053.4	840360	11	5535774	-0.725	0.604997	-2.6	0.030569	0.609	4.61	60.6	0.255	93.113	4.6453	5.3	4.3575	4.1368
C3orf47	NM_001025468.1	3180725	3	130524897	-0.725	0.604997	-2.38	0.043613	0.62	4	18.143	0.297	95.408	3.9409	4.775	3.5377	3.7273
	BG184196	1820154	21	14971094	-0.725	0.604997	-2.24	0.054499	0.625	4.42	53.031	0.33	96.595	5.1929	4.3696	4.3065	3.807
LOC648256	XM_943583.1	4490364			-0.725	0.604997	-2.2	0.058152	0.627	4.79	64.735	0.341	96.881	5.5579	4.7418	4.1375	4.7119
NFASC	NM_001005389.1	4040128	1	203212643	-0.725	0.604997	-1.77	0.113296	0.683	3.98	17.245	0.503	99.104	4.8836	3.8088	4.0717	3.1716
GAD2	NM_000818.1	7210736	10	26633089	-0.725	0.604997	-1.54	0.160107	0.717	3.74	3.976	0.649	99.627	4.1557	4.0552	4.2228	2.5389
LOC645411	XM_932886.1	4220730	18	75651167	-0.724	0.605417	-3.04	0.015326	0.587	4.82	65.184	0.196	87.858	5.0361	5.3194	4.3434	4.5632
LOC652424	XM_941864.1	2490129			-0.724	0.605417	-2.27	0.051859	0.621	4.1	28.015	0.32	96.31	4.3154	4.6161	4.1851	3.2992
MALT1	NM_006785.2	1770386	18	54568095	-0.723	0.605836	-3.05	0.015195	0.587	7.26	85.476	0.195	87.682	7.601	7.6435	6.7259	7.0723
PRKG1	NM_006258.1	6860288	10	53725238	-0.723	0.605836	-2.98	0.017042	0.587	3.92	12.121	0.203	88.571	4.2683	4.2888	3.35	3.7605
RCADH5	XM_001717469.1	5490440			-0.723	0.605836	-2.87	0.020201	0.587	6.08	77.633	0.215	89.882	6.4783	6.3973	5.9585	5.4711
CIDEA	NM_001279.2	10048	18	12267509	-0.723	0.605836	-2.59	0.031342	0.609	4.12	29.214	0.255	93.096	4.5019	4.4544	3.4083	4.1022
LRP11	NM_032832.4	240615	6	150182212	-0.722	0.606256	-3.24	0.011329	0.581	6.81	82.702	0.176	84.999	7.1595	7.1848	6.3947	6.5053
SNTB2	NM_006750.3	840053	16	67851608	-0.722	0.606256	-3.23	0.011579	0.581	5.27	70.704	0.177	85.2	5.6136	5.6485	4.8394	4.9782
NSL1	NM_001042549.1	5490112	1	212899857	-0.722	0.606256	-2.9	0.019137	0.587	4.28	43.347	0.209	89.314	4.6005	4.6716	3.6855	4.1436
TRO	NM_001039705.1	5260561	X	54957643	-0.722	0.606256	-2.45	0.038752	0.615	4.67	62.351	0.278	94.51	4.6576	5.4101	4.4346	4.1884
RDX	NM_002906.3	6110291	11	110100702	-0.721	0.606677	-3.24	0.011312	0.581	7.85	88.802	0.175	84.815	8.1676	8.2457	7.5148	7.4568
LOC100134699	XM_001718002.1	4540286	7	16182385	-0.721	0.606677	-3.23	0.011414	0.581	4.32	47.016	0.176	84.961	4.724	4.6457	4.0067	3.9203
MCM7	NM_182776.1	2360528	7	99696851	-0.721	0.606677	-3.2	0.012027	0.583	4.99	67.748	0.178	85.31	5.3111	5.3845	4.7051	4.5491
GLT6D1	NM_182974.2	6560687	9	138515850	-0.721	0.606677	-2.53	0.034111	0.609	4.23	39.756	0.262	93.544	4.4056	4.7818	4.1851	3.5603
LOC652696	XM_942305.1	7650273			-0.721	0.606677	-2.52	0.035033	0.609	4.24	40.029	0.265	93.688	4.3978	4.7954	3.5633	4.1884
HOXD12	NM_021193.2	650731	2	176673527	-0.721	0.606677	-2.23	0.055441	0.625	3.89	10.252	0.328	96.555	4.285	4.2132	3.0481	4.0082
LOC645427	XM_928468.1	7210021	17	21257901	-0.721	0.606677	-1.98	0.082022	0.659	4.25	41.363	0.406	98.13	4.3527	4.8731	3.3618	4.4214
LOC728802	XM_001132893.1	6770632	1	144736330	-0.72	0.607097	-3.25	0.011106	0.58	4.46	55.174	0.173	84.466	4.8329	4.8129	4.1127	4.0938
MAPKAP1	NM_001006618.1	60102	9	128283829	-0.72	0.607097	-2.92	0.018436	0.587	6.45	80.335	0.205	88.793	6.6259	6.9936	6.2101	5.9703
MRPL20	NM_017971.2	520521	1	1332472	-0.72	0.607097	-2.89	0.019361	0.587	8.65	92.691	0.209	89.289	9.0515	8.9797	8.0655	8.5253
UBE2NL	NM_001012989.1	2030195	X	142795885	-0.72	0.607097	-2.45	0.038899	0.615	4.58	59.685	0.276	94.37	5.1438	4.7285	4.5506	3.8824
RABGEF1	NM_014504.1	1940707	7	65913114	-0.719	0.607518	-3.11	0.013805	0.587	5.67	74.464	0.184	86.323	6.0791	5.9728	5.4323	5.1822
LOC728193	XM_001128013.1	6590553	4	53312313	-0.719	0.607518	-2.82	0.021657	0.593	4.83	65.404	0.217	90.076	4.9528	5.4221	4.5758	4.3604
LOC100132441	XR_037882.1	150632	9	42997349	-0.719	0.607518	-2.79	0.022902	0.599	4.3	45.11	0.221	90.453	4.4484	4.8679	3.7694	4.1098
SRD5A2	NM_000348.3	6350035	2	31749915	-0.719	0.607518	-2.01	0.078192	0.656	3.78	5.081	0.392	97.912	4.5491	3.7301	3.8215	3.0192
LOC645545	XM_928563.1	6960280	17	54093627	-0.719	0.607518	-1.86	0.098061	0.673	4.02	20.688	0.448	98.66	4.528	4.2395	4.2918	3.0377
SNORD5	NR_003033.1	5690470	11	93466397	-0.718	0.60794	-2.79	0.0227	0.598	3.82	6.532	0.22	90.36	3.9696	4.384	3.2889	3.6281
OR51T1	NM_001004759.1	1260491	11	4860216	-0.718	0.60794	-2.27	0.052131	0.621	4.34	48.119	0.314	96.049	5.0922	4.3046	3.7399	4.2216
PDLIM7	NM_213636.1	4560164	5	176917287	-0.717	0.608361	-3.24	0.011336	0.581	6.3	79.312	0.172	84.334	6.6754	6.6479	5.9627	5.926
AFAP1L2	NM_001001936.1	4590133	10	116057592	-0.717	0.608361	-3.08	0.01439	0.587	5.14	69.463	0.185	86.445	5.4194	5.5856	4.905	4.6664
PTER	NM_030664.3	110674	10	16555489	-0.717	0.608361	-3.04	0.015496	0.587	3.82	6.64	0.19	87.085	4.0518	4.3046	3.35	3.5725
LOC100134189	XM_001722214.1	830674			-0.717	0.608361	-2.92	0.018546	0.587	7.18	84.976	0.203	88.609	7.4647	7.6088	6.6147	7.0245
PARP12	NM_022750.2	2340072	7	139723786	-0.717	0.608361	-2.91	0.018863	0.587	6.11	77.839	0.204	88.692	6.4636	6.4638	5.9677	5.5265
FOXD2	NM_004474.3	510180	1	47678784	-0.717	0.608361	-2.73	0.025084	0.606	6.22	78.677	0.227	91.046	6.3006	6.8495	5.9494	5.7663
LOC647960	XM_943150.1	4120241			-0.717	0.608361	-2.55	0.033032	0.609	4.01	19.32	0.254	93.028	4.7164	4.0171	3.6094	3.6903
ZMAT3	NM_152240.1	3140543	3	180224833	-0.717	0.608361	-2.41	0.04143	0.618	6.36	79.744	0.281	94.654	6.8419	6.6043	6.3933	5.618
MAPK4	NM_002747.3	4860403	18	46511729	-0.716	0.608783	-2.68	0.027242	0.609	4.25	41.111	0.233	91.548	4.7164	4.4972	4.1772	3.6047
MLL3	NM_170606.2	780102	7	151833932	-0.716	0.608783	-2.64	0.029054	0.609	4.73	63.528	0.24	92.081	5.1884	4.9824	4.6739	4.0646
LOC116412	XM_938741.1	630482			-0.716	0.608783	-2.56	0.032885	0.609	4.16	33.724	0.253	92.954	4.4754	4.5693	4.153	3.4594
LOC100129707	XR_038954.1	4590735	3	121231261	-0.716	0.608783	-2.22	0.056251	0.625	4.28	43.899	0.323	96.407	4.3154	4.9639	4.2758	3.5725
LOC645929	XM_928899.1	4850056	8	68038480	-0.716	0.608783	-2.01	0.077819	0.656	3.66	2.141	0.385	97.8	3.4583	4.5833	3.3782	3.232
SNTB2	NM_006750.2	1240750	16	67891156	-0.715	0.609205	-3.19	0.012215	0.583	7.58	87.368	0.174	84.713	7.8592	8.0071	7.2058	7.2299
LOC391033	XM_941328.1	7560064			-0.715	0.609205	-3	0.016283	0.587	4.06	24.071	0.192	87.352	4.4484	4.3921	3.5271	3.8824
	AI445566	7380072	1	221775124	-0.715	0.609205	-2.5	0.036171	0.609	4.68	62.669	0.262	93.534	5.0022	5.0833	4.696	3.9596
FOXA1	NM_004496.2	830056	14	38059458	-0.713	0.61005	-3.02	0.01595	0.587	6.04	77.335	0.188	86.826	6.4161	6.3714	5.5139	5.8483
FAM71D	NM_173526.2	5890673	14	66761621	-0.713	0.61005	-2.91	0.018765	0.587	3.69	2.653	0.199	88.228	3.9011	4.1877	3.1746	3.4891
	BQ014132	7100553	5	34684775	-0.713	0.61005	-2.41	0.041387	0.618	3.86	8.744	0.276	94.402	4.4956	3.9409	3.2167	3.7931
GRB14	XM_944164.1	5490037			-0.713	0.61005	-2.39	0.042566	0.618	3.95	14.402	0.28	94.59	4.331	4.2808	3.9985	3.1864
LOC646795	XM_933942.2	5820162	22	36153644	-0.713	0.61005	-2	0.078919	0.656	4.44	54.104	0.385	97.792	4.8053	4.7896	3.5157	4.6524
CCRL2	NM_001130910.1	3360372	3	46449865	-0.712	0.610473	-2.96	0.017341	0.587	4.07	25.119	0.193	87.5	4.2433	4.6161	3.7588	3.6767
OR1N2	NM_001004457.1	4250431	9	124355689	-0.712	0.610473	-2.83	0.021541	0.591	4.06	24.048	0.21	89.344	4.2275	4.6093	3.5501	3.862
LOC644038	XM_928871.2	5870477	9	68543304	-0.712	0.610473	-2.46	0.038371	0.614	4	18.498	0.265	93.729	4.4609	4.2489	3.2776	4.0082
ZIC3	NM_003413.2	670414	X	136481778	-0.712	0.610473	-2.34	0.046662	0.62	4.41	52.707	0.291	95.111	4.4335	5.1052	4.3214	3.7931
XPNPEP3	NM_022098.2	1710446	22	39653117	-0.712	0.610473	-1.94	0.086668	0.664	4.64	61.432	0.405	98.109	5.0871	4.9012	3.6949	4.8696
GAS7	NM_201433.1	1070435	17	9814868	-0.711	0.610897	-2.99	0.016698	0.587	4.57	59.501	0.189	86.96	5.0564	4.7954	4.0945	4.3362
C2orf57	NM_152614.1	1690671	2	232167163	-0.711	0.610897	-2.69	0.026806	0.609	3.9	11.217	0.227	91.038	4.4269	4.0924	3.3039	3.7931
LOC643986	XM_931962.1	5270615	X	129071689	-0.711	0.610897	-2.53	0.034236	0.609	4.13	30.577	0.251	92.859	4.1476	4.8238	3.8734	3.6767
GALNT13	NM_052917.2	6480575	2	155017499	-0.711	0.610897	-2.41	0.04116	0.618	3.89	10.226	0.273	94.197	4.4609	4.0266	3.8635	3.2023
	CN304251	2640095	20	56825622	-0.711	0.610897	-1.83	0.102782	0.677	3.73	3.671	0.449	98.668	3.8292	4.3446	3.971	2.7804
TERC	NR_001566.1	3420678	3	170965371	-0.711	0.610897	-1.75	0.11731	0.687	6.16	78.258	0.491	99.009	7.1684	5.8707	6.0584	5.5583
SH3GL1	NM_003025.2	4280639	19	4360440	-0.71	0.61132	-3.17	0.012692	0.584	7	83.867	0.172	84.392	7.419	7.2912	6.6011	6.6884
ZNF511	NM_145806.2	1260435	10	134976544	-0.71	0.61132	-3.06	0.015036	0.587	8.38	91.531	0.182	85.996	8.8801	8.5894	8.0152	8.0338
LYL1	NM_005583.3	3190288	19	13074680	-0.71	0.61132	-3	0.016397	0.587	6.51	80.737	0.188	86.74	7.0272	6.7082	6.0947	6.2208
CD276	NM_025240.2	5420561	15	71781984	-0.71	0.61132	-1.68	0.129329	0.694	4.34	47.981	0.524	99.217	5.368	4.0171	4.2614	3.7036
PRTG	NM_173814.3	4890747	15	53699381	-0.709	0.611744	-3.12	0.013581	0.587	3.97	15.983	0.175	84.802	4.3903	4.2564	3.6949	3.5344
ENKUR	NM_145010.2	4880022	10	25311608	-0.709	0.611744	-2.43	0.04002	0.617	4.08	25.718	0.268	93.862	4.1798	4.6894	4.0164	3.4341
	CB270075	6620082	16	87107166	-0.709	0.611744	-2.18	0.05942	0.632	4.08	26.095	0.324	96.445	4.5792	4.2979	4.193	3.2652
LOC645431	NR_024334.1	5080725	14	65877530	-0.708	0.612168	-2.61	0.030218	0.609	4.31	45.724	0.235	91.683	4.9372	4.384	4.1127	3.7931
MKNK1	NM_003684.3	6450278	1	46795909	-0.708	0.612168	-2.43	0.040173	0.617	7.25	85.406	0.266	93.775	7.5818	7.6258	7.2812	6.5106
SAGE1	NM_018666.1	6040242	X	134821610	-0.707	0.612593	-2.68	0.027182	0.609	3.34	0.127	0.225	90.813	3.4307	3.9604	3.1167	2.8597
FRAS1	NM_032863.2	5050435	4	79459575	-0.707	0.612593	-2.37	0.044319	0.62	4.1	27.829	0.278	94.482	4.0864	4.8238	3.9236	3.5725
AQP2	NM_000486.3	4480079	12	48638827	-0.707	0.612593	-2.26	0.052528	0.622	3.96	15.57	0.302	95.59	4.5618	4.0732	3.9886	3.232
	BM674241	1570670	17	29150979	-0.707	0.612593	-2.12	0.065267	0.641	4.07	24.873	0.338	96.801	4.1963	4.6524	4.1698	3.2652
FPR3	NM_002030.3	5310402	19	52329046	-0.707	0.612593	-1.61	0.145238	0.705	3.79	5.31	0.567	99.422	4.0945	4.1877	2.6607	4.2067
SYT11	NM_152280.2	5910500	1	154121345	-0.706	0.613017	-3.1	0.01396	0.587	5.09	68.885	0.174	84.69	5.3412	5.5434	4.696	4.7763
RSU1	NM_012425.3	6110209	10	16673664	-0.706	0.613017	-3.08	0.014544	0.587	6.58	81.228	0.177	85.103	6.8105	7.0596	6.2352	6.2226
LOC651315	XM_940450.1	3390685			-0.706	0.613017	-3.04	0.01545	0.587	3.67	2.232	0.18	85.622	4.0349	4.0074	3.4594	3.1716
LOC100131658	XM_001724476.1	4590309			-0.706	0.613017	-2.97	0.017077	0.587	4.08	25.329	0.187	86.653	4.5208	4.3375	3.8734	3.5725
LCT	NM_002299.2	2680711	2	136545907	-0.706	0.613017	-2.94	0.017977	0.587	3.87	8.937	0.19	87.14	4.1638	4.2733	3.6949	3.3297
LOC100130992	XM_001722099.1	4010376			-0.706	0.613017	-2.92	0.018624	0.587	4.28	43.889	0.193	87.43	4.6319	4.6377	3.729	4.1285
PRKCDBP	NM_145040.2	7550307	11	6340362	-0.706	0.613017	-2.86	0.020286	0.587	7.67	87.908	0.199	88.143	7.8782	8.1687	7.1502	7.4851
PCDH19	NM_020766.1	7150397	X	99433663	-0.706	0.613017	-2.82	0.021872	0.595	4.2	36.686	0.205	88.825	4.7101	4.3921	4.026	3.6638
LPGAT1	NM_014873.1	60070	1	209986819	-0.706	0.613017	-2.57	0.032042	0.609	4.49	56.501	0.239	92.018	4.5748	5.1166	4.3293	3.9503
LOC100129686	XM_001719479.1	360088			-0.706	0.613017	-2.27	0.051807	0.621	4.02	20.647	0.298	95.427	4.4484	4.3046	3.232	4.1098
TIAM2	NM_001010927.2	7050612	6	155578084	-0.706	0.613017	-1.95	0.085864	0.664	5.46	72.624	0.393	97.925	5.8065	5.8237	4.526	5.693
CCDC116	NM_152612.2	1470379	22	20321415	-0.705	0.613442	-3.02	0.015786	0.587	5.35	71.578	0.181	85.793	5.624	5.7768	4.8649	5.1251
SCARNA20	NR_002999.2	1170497	17	58308930	-0.705	0.613442	-2.76	0.023718	0.601	4.61	60.651	0.21	89.42	5.2223	4.7051	4.2458	4.2714
LOC647584	XM_936635.1	2650711			-0.705	0.613442	-2.5	0.036048	0.609	3.96	15.63	0.25	92.795	4.6453	3.9886	3.7507	3.4737
PSD3	NM_015310.3	5560630	8	18435991	-0.705	0.613442	-2.47	0.037519	0.611	5.38	71.868	0.255	93.091	5.955	5.5111	5.3191	4.7374
SHOX2	NM_006884.2	2000739	3	159297914	-0.705	0.613442	-2.46	0.038602	0.615	4.62	60.926	0.259	93.35	5.3222	4.6233	4.3983	4.1368
AAK1	NM_014911.3	1170332	2	69692089	-0.705	0.613442	-2.17	0.061001	0.636	5.06	68.565	0.323	96.403	5.4094	5.4153	5.1933	4.2216
CDCP1	NM_178181.1	150463	3	45153802	-0.704	0.613868	-3.17	0.012565	0.584	5.91	76.344	0.166	83.369	6.2759	6.2497	5.5918	5.5265
LOC652204	XM_945283.1	1260184			-0.704	0.613868	-3.07	0.014662	0.587	4.26	41.678	0.176	84.934	4.6136	4.6019	3.78	4.0266
	AK123157	7380537	11	17760687	-0.704	0.613868	-2.92	0.018599	0.587	4.09	26.917	0.191	87.142	4.4888	4.3993	3.5501	3.9306
ZFP14	NM_020917.1	4560601	19	41519350	-0.704	0.613868	-2.49	0.036766	0.61	4.33	47.31	0.251	92.865	4.4335	4.9266	4.2382	3.7146
ITPRIP	NM_033397.2	2970347	10	106072438	-0.704	0.613868	-2.43	0.040176	0.617	6.83	82.785	0.262	93.513	6.8404	7.5124	6.2942	6.6513
CCDC63	NM_152591.1	7050128	12	109826894	-0.704	0.613868	-2.32	0.04814	0.62	4.17	34.048	0.285	94.857	4.1025	4.9376	3.893	3.7391
LOC651974	XM_941263.1	6660438			-0.703	0.614293	-2.91	0.018808	0.587	3.91	11.63	0.19	87.102	4.069	4.4544	3.5975	3.5207
RBM12B	NM_203390.2	450132	8	94813467	-0.703	0.614293	-2.9	0.019016	0.587	6.45	80.333	0.191	87.254	6.9799	6.6227	6.0087	6.1882
	AK096912	6350253	11	92517466	-0.703	0.614293	-2.88	0.019763	0.587	4.73	63.698	0.194	87.614	4.8777	5.293	4.413	4.3522
CERKL	NM_201548.3	4070524	2	182110829	-0.703	0.614293	-2.65	0.028588	0.609	4.28	43.857	0.225	90.811	4.3387	4.9266	3.9886	3.8711
C14orf144	XM_930354.1	6270133	14	103775315	-0.703	0.614293	-2.51	0.035342	0.609	4.29	44.649	0.246	92.516	4.2992	4.9883	3.8833	3.9985
GABRA6	NM_000811.1	540162	5	161061206	-0.703	0.614293	-2.44	0.039639	0.617	3.8	5.858	0.259	93.375	3.7863	4.5177	3.5377	3.3606
HAND2	NM_021973.1	6350546	4	174683084	-0.703	0.614293	-2.39	0.042978	0.62	4.13	30.594	0.27	93.987	4.121	4.8435	3.9417	3.616
AGPAT6	NM_178819.2	3870022	8	41597578	-0.702	0.614719	-3.09	0.014206	0.587	5.95	76.655	0.171	84.229	6.206	6.3929	5.6414	5.5543
LOC645504	XM_928527.1	5560358	7	447	-0.702	0.614719	-3.05	0.015209	0.587	3.9	10.912	0.175	84.915	4.2275	4.2733	3.4207	3.6767
LOC644683	XM_927783.1	1340735	5	164697740	-0.702	0.614719	-3.02	0.016008	0.587	4.01	19.14	0.179	85.497	4.5019	4.2132	3.6204	3.6903
LOC729792	XM_001131329.1	1400148	6	31108091	-0.702	0.614719	-2.97	0.017155	0.587	3.98	16.889	0.183	86.155	4.4484	4.2132	3.7507	3.5071
USMG5	NM_032747.2	2320253	10	105154019	-0.702	0.614719	-2.91	0.018916	0.587	6.34	79.588	0.19	87.061	6.827	6.5543	5.8466	6.1308
LOC100130721	XR_037257.1	2600722	7	64438123	-0.702	0.614719	-2.89	0.019503	0.587	3.88	9.858	0.192	87.383	4.0349	4.4296	3.5866	3.4737
LOC728707	XR_015588.2	2000253	5	37541645	-0.702	0.614719	-2.69	0.02652	0.609	3.75	4.091	0.217	90.123	4.069	4.1293	3.1167	3.6767
	BM987153	2650132	7	152192479	-0.702	0.614719	-2.48	0.037036	0.61	4.2	36.66	0.25	92.778	4.3154	4.7818	3.5745	4.1195
LOC100130332	XM_001723315.1	4590519			-0.702	0.614719	-2.43	0.039997	0.617	5.13	69.342	0.26	93.407	5.6163	5.3535	4.4281	5.1368
LOC650239	XM_943161.1	5340379			-0.702	0.614719	-2.04	0.074349	0.655	4.13	30.969	0.355	97.203	4.069	4.9012	4.121	3.4461
GABPAP	NR_002723.2	7000576			-0.702	0.614719	-1.83	0.102742	0.677	4.02	20.654	0.434	98.514	4.1877	4.5618	3.0649	4.2808
PIP5KL1	NM_173492.1	4830546	9	130683995	-0.701	0.615146	-3.14	0.013147	0.587	4.36	49.387	0.166	83.335	4.7043	4.7123	3.9509	4.0646
PPP2R2C	NM_181876.2	3450047	4	6373966	-0.701	0.615146	-3.02	0.016017	0.587	7.38	86.183	0.178	85.302	7.6311	7.8194	6.9125	7.136
ABCC9	NM_020298.2	4040025	12	21968793	-0.701	0.615146	-2.98	0.016929	0.587	4.61	60.498	0.181	85.829	5.1114	4.801	4.2067	4.3046
CXCL16	NM_022059.1	290379	17	4589707	-0.701	0.615146	-2.17	0.060378	0.634	4.19	35.741	0.316	96.155	4.7043	4.3696	4.2838	3.3885
LOC100129559	XR_038027.1	270528	3	159810410	-0.701	0.615146	-2.11	0.066298	0.642	4.11	28.79	0.333	96.682	4.4208	4.5051	3.2605	4.2634
LOC649044	XM_944545.1	2570408			-0.7	0.615572	-2.91	0.018911	0.587	4.2	36.914	0.188	86.839	4.6319	4.47	3.6752	4.0266
ATP6V1B1	NM_001692.3	6290239	2	71045957	-0.7	0.615572	-2.75	0.024167	0.603	4.71	63.145	0.207	89.026	5.2383	4.8731	4.1772	4.5347
RETNLB	NM_032579.1	5270553	3	109957095	-0.7	0.615572	-2.51	0.035276	0.609	4.47	55.627	0.242	92.278	4.7887	4.8563	3.78	4.4657
SPG21	XM_945617.1	3780446			-0.7	0.615572	-2.44	0.039365	0.616	4.15	32.239	0.256	93.151	4.5748	4.4214	4.1612	3.4341
	DA297081	1400047	14	100610185	-0.7	0.615572	-2.38	0.0435	0.62	4.11	28.278	0.267	93.839	4.1127	4.801	3.5633	3.9503
DTNBP1	NM_183040.1	4590450	6	15632491	-0.699	0.615999	-2.86	0.020449	0.587	3.71	3.161	0.193	87.443	3.9596	4.1612	3.1746	3.5484
C6orf211	NM_024573.1	2750129	6	151790288	-0.699	0.615999	-2.78	0.023141	0.599	5.8	75.461	0.203	88.594	6.0074	6.2845	5.2458	5.6477
CAPN5	NM_004055.4	6760661	11	76514748	-0.698	0.616426	-3.11	0.013897	0.587	6.13	78.021	0.167	83.511	6.408	6.5543	5.7474	5.8186
NFKBIE	NM_004556.2	540139	6	44333944	-0.698	0.616426	-2.76	0.023832	0.602	6.39	79.939	0.204	88.757	6.885	6.5974	5.8382	6.2475
GRIP2	NM_001080423.1	2690053	3	14547196	-0.698	0.616426	-2.59	0.031176	0.609	3.81	6.032	0.228	91.074	4.2351	4.0732	3.7588	3.1541
MAGEC3	NM_177456.2	3310377	X	140813232	-0.698	0.616426	-2.36	0.044565	0.62	3.99	17.99	0.268	93.894	4.6386	4.0458	3.3782	3.9099
C3orf56	NM_001007534.1	5570674	3	128399594	-0.698	0.616426	-2.27	0.051928	0.621	4.06	24.039	0.289	95.02	4.7763	4.0458	3.4761	3.9503
PRELP	NM_201348.1	7000446	1	201726515	-0.698	0.616426	-2.11	0.066169	0.641	4.24	40.778	0.329	96.576	4.9307	4.2564	3.5271	4.2634
CDKN1C	NM_000076.1	5890653	11	2861687	-0.697	0.616854	-2.73	0.024866	0.603	6.06	77.449	0.206	88.961	6.4068	6.4021	5.4502	5.9655
LOC100133875	XM_001720097.1	6330612			-0.697	0.616854	-2.67	0.027638	0.609	3.8	5.977	0.216	89.947	4.4335	3.8703	3.4207	3.4891
MIR543	NR_030619.1	2260475			-0.697	0.616854	-2.6	0.030595	0.609	3.58	1.033	0.225	90.875	3.7219	4.1293	3.4594	2.9972
LOC644695	XM_932310.2	6130152	17	44069024	-0.696	0.617281	-3.12	0.013678	0.587	6.35	79.617	0.164	83.106	6.6733	6.7159	5.9377	6.059
RPRD1A	NM_018170.3	2600706	18	33570381	-0.696	0.617281	-3.03	0.015609	0.587	7.84	88.772	0.172	84.366	8.144	8.2335	7.3752	7.6101
MIR337	NR_029889.1	3440286			-0.696	0.617281	-2.99	0.016586	0.587	4.14	31.966	0.176	85.01	4.4679	4.5177	3.9417	3.6514
TGIF1	NM_003244.2	4210196	18	3440265	-0.696	0.617281	-2.92	0.018468	0.587	5.35	71.62	0.183	86.134	5.6207	5.7807	4.8435	5.1655
LOC642335	XM_930823.2	6350156	6	481288	-0.696	0.617281	-2.8	0.022568	0.597	4.28	43.332	0.198	88.023	4.3903	4.8563	3.914	3.94
MIR1276	NR_031682.1	1940411			-0.696	0.617281	-2.21	0.057144	0.625	4.17	33.783	0.301	95.575	4.285	4.7418	3.4207	4.2138
LOC642730	XM_931047.1	110703	8	92061827	-0.696	0.617281	-1.55	0.159606	0.717	4.02	20.421	0.587	99.486	4.1293	4.6093	2.9109	4.4354
GPR137B	NM_003272.1	1240392	1	234438518	-0.695	0.617709	-3.06	0.014936	0.587	5.92	76.435	0.169	83.843	6.2465	6.293	5.4707	5.6781
VBP1	NM_003372.4	4860358	X	154121137	-0.695	0.617709	-2.9	0.019093	0.587	10.16	97.057	0.185	86.339	10.6054	10.4113	9.6524	9.9736
TMUB2	NM_001076674.1	4200270	17	39622408	-0.695	0.617709	-2.56	0.032623	0.609	4.39	51.473	0.229	91.203	5.0521	4.4296	4.121	3.9703
LOC648302	XM_944495.1	1430273			-0.695	0.617709	-2.47	0.037941	0.612	4.4	51.784	0.246	92.499	4.9372	4.5541	4.3505	3.7499
LOC647881	XM_939136.1	380427			-0.695	0.617709	-2.31	0.048395	0.62	3.95	14.469	0.275	94.343	4.1476	4.4473	3.2167	3.9886
LOC154449	NR_002787.1	10192	6	170563549	-0.695	0.617709	-1.85	0.099711	0.673	4.39	51.572	0.414	98.264	4.8002	4.6836	4.6606	3.4341
S100A3	NM_002960.1	150100	1	153519825	-0.694	0.618138	-2.72	0.025359	0.606	6.65	81.679	0.205	88.823	6.7539	7.2418	6.2189	6.3891
CHIA	NM_201653.2	2350204	1	111654615	-0.694	0.618138	-2.29	0.050231	0.621	3.55	0.779	0.28	94.569	3.9409	3.8485	3.6204	2.7804
MYT1L	NM_015025.2	3420050	2	1870290	-0.693	0.618566	-2.48	0.036893	0.61	4.13	30.935	0.24	92.124	4.8238	4.1375	3.8359	3.7391
	BX096476	7510577	18	17727870	-0.693	0.618566	-2.05	0.07321	0.653	4.07	24.581	0.34	96.86	4.1638	4.6646	4.1772	3.2652
WHSC1	NM_014919.1	380349	4	1924684	-0.692	0.618995	-3.1	0.014071	0.587	4.05	22.612	0.163	82.761	4.4554	4.3293	3.6855	3.7146
RHOXF1	NM_139282.1	3190593	X	119246792	-0.692	0.618995	-3.04	0.015502	0.587	4.01	19.072	0.168	83.752	4.4056	4.2979	3.7588	3.5603
NTRK1	NM_001012331.1	7050113	1	155116572	-0.692	0.618995	-2.76	0.023849	0.602	4.06	23.95	0.198	88.063	4.2047	4.6093	3.8452	3.5846
LOC439936	XR_000620.1	3940180			-0.692	0.618995	-2.61	0.030336	0.609	3.43	0.305	0.219	90.299	3.4844	4.0732	3.1361	3.0377
KRTAP10-10	NM_181688.1	3290327	21	44882553	-0.691	0.619424	-2.96	0.017486	0.587	4.24	40.689	0.175	84.783	4.6515	4.526	3.7588	4.037
KLK11	NM_144947.1	5900008	19	56217339	-0.691	0.619424	-2.86	0.020532	0.587	4.39	51.178	0.186	86.549	4.9062	4.5618	4.1453	3.94
LOC100132767	XM_001725561.1	4920142	16	29514480	-0.691	0.619424	-2.32	0.04808	0.62	4.92	66.751	0.27	94.038	5.3376	5.1893	4.9732	4.1711
LOC647174	XM_930203.2	650019	13	50813469	-0.691	0.619424	-1.72	0.12164	0.69	3.92	12.475	0.468	98.838	3.7336	4.801	3.9985	3.1541
PPAP2B	NM_003713.3	7050575	1	56960852	-0.69	0.619854	-3.09	0.01418	0.587	8.6	92.469	0.161	82.412	8.9202	8.9631	8.1991	8.305
LOC283553	XR_017821.1	3870739			-0.69	0.619854	-3.09	0.014358	0.587	5.41	72.071	0.162	82.66	5.7895	5.7103	5.0029	5.1162
GPRC5C	NM_018653.3	7510634	17	69955058	-0.69	0.619854	-2.84	0.021208	0.59	6.44	80.284	0.187	86.638	6.776	6.7991	5.8923	6.3038
PRSS8	NM_002773.3	990619	16	31142772	-0.69	0.619854	-2.73	0.024911	0.603	8.09	90.125	0.2	88.275	8.508	8.3672	7.5096	7.9855
ZNF606	NM_025027.3	770484	19	63180378	-0.69	0.619854	-2.57	0.032385	0.609	4.06	23.48	0.223	90.724	4.6319	4.1705	3.5019	3.9203
ADRA2B	NM_000682.5	3390286	2	96778849	-0.69	0.619854	-2.55	0.033241	0.609	4.94	67.119	0.225	90.879	5.0759	5.4973	4.8337	4.3604
OR5A2	NM_001001954.1	4880187	11	59189474	-0.69	0.619854	-2.47	0.03756	0.611	4.06	24.092	0.238	91.961	4.376	4.4391	4.0624	3.3734
	DB075090	4210291	20	45960728	-0.69	0.619854	-2.35	0.045817	0.62	4.21	37.852	0.263	93.595	4.7702	4.3446	4.1995	3.5344
LOC643962	XM_931945.1	1300414	6	87598537	-0.69	0.619854	-1.43	0.190072	0.732	3.71	3.136	0.669	99.676	4.1025	4.0074	2.4914	4.2388
TROVE2	NM_001042370.1	4220278	1	191295419	-0.689	0.620284	-3.1	0.0141	0.587	6.45	80.326	0.16	82.224	6.8404	6.7474	6.0947	6.1154
THRA	NM_199334.2	6220523	17	35499439	-0.689	0.620284	-3.05	0.015057	0.587	4.42	53.291	0.164	82.969	4.8329	4.7051	4.0164	4.1436
TWIST2	NM_057179.1	2260242	2	239756958	-0.689	0.620284	-2.89	0.019468	0.587	4.07	25.083	0.18	85.596	4.5618	4.2733	3.6204	3.8376
BRD4	NM_014299.1	6060768	19	15220351	-0.689	0.620284	-2.87	0.020006	0.587	4.29	44.143	0.182	85.897	4.4412	4.8175	3.9509	3.9306
EXPH5	NM_015065.1	7650286	11	107885192	-0.688	0.620714	-3.07	0.014658	0.587	4.7	63.033	0.161	82.448	4.9835	5.1052	4.3915	4.3221
TMEM188	NM_153261.4	5340148	16	48628012	-0.688	0.620714	-3	0.01652	0.587	7.54	87.186	0.169	83.82	7.9046	7.8723	7.0743	7.3262
COL22A1	NM_152888.1	840288	8	139743471	-0.688	0.620714	-2.94	0.018078	0.587	4.11	28.602	0.175	84.773	4.5491	4.3604	3.893	3.6398
SRY	NM_003140.1	7160259	Y	2715089	-0.688	0.620714	-2.27	0.051863	0.621	4.02	20.542	0.277	94.423	4.0437	4.6894	3.9509	3.4058
BTBD11	NM_001017523.1	4040484	12	106498863	-0.687	0.621144	-2.95	0.017764	0.587	4.12	29.97	0.172	84.387	4.6136	4.3214	3.8112	3.7499
	AW087252	1510369	5	124690284	-0.687	0.621144	-2.61	0.030454	0.609	4.24	40.145	0.214	89.767	4.2992	4.8623	3.971	3.8173
SGK	NM_005627.2	4390450	6	134532365	-0.686	0.621575	-3.07	0.014659	0.587	7.05	84.171	0.16	82.171	7.4226	7.3648	6.6517	6.7636
ZFP36L1	NM_004926.2	830164	14	69254536	-0.686	0.621575	-3.04	0.015439	0.587	8.58	92.386	0.162	82.736	8.943	8.9012	8.3257	8.1468
CBR1	NM_001757.2	2900377	21	36366911	-0.686	0.621575	-2.96	0.017513	0.587	4.15	32.621	0.17	84.127	4.3527	4.6377	3.8009	3.8173
H3F3B	NM_005324.3	1440296	17	73772637	-0.686	0.621575	-2.92	0.01864	0.587	9.61	95.833	0.174	84.732	9.8003	10.105	9.323	9.2106
NXPH2	NM_007226.1	840377	2	139144936	-0.686	0.621575	-2.9	0.01908	0.587	4.06	23.516	0.176	85.069	4.5347	4.2647	3.6094	3.8173
C18orf19	NM_152352.1	3450300	18	13671757	-0.686	0.621575	-2.9	0.019166	0.587	5.57	73.623	0.176	85.008	5.7799	6.0526	5.3327	5.1284
ZNF136	XM_001126650.1	60064			-0.686	0.621575	-2.78	0.023153	0.599	3.68	2.418	0.19	87.023	3.9211	4.121	3.1361	3.5344
2013-09-10	NM_144710.2	3710386	2	110301579	-0.686	0.621575	-2.73	0.024828	0.603	4.91	66.651	0.196	87.819	5.4976	5.0143	4.5758	4.5632
CGRRF1	NM_006568.2	1940561	14	54074683	-0.686	0.621575	-2.73	0.025014	0.605	7.26	85.505	0.197	87.887	7.7712	7.4434	6.7404	7.1012
HEBP1	NM_015987.3	360689	12	13127952	-0.686	0.621575	-2.64	0.02868	0.609	8.29	91.103	0.207	89.096	8.6597	8.6074	7.6734	8.2226
TPM3	NM_152263.2	6280091	1	154140138	-0.686	0.621575	-2.49	0.036441	0.609	4.57	59.319	0.231	91.376	4.6453	5.1715	4.0164	4.4281
EIF4G1	NM_004953.2	4280280	3	185521051	-0.685	0.622006	-2.88	0.019897	0.587	3.94	13.974	0.178	85.366	4.2752	4.2979	3.4207	3.7817
ATP2B4	NM_001684.3	6900630	1	201979139	-0.685	0.622006	-2.35	0.045318	0.62	6.32	79.448	0.255	93.123	6.6567	6.6735	5.5954	6.3649
LOC100134360	XM_001717847.1	10564			-0.684	0.622437	-2.9	0.019261	0.587	4.29	44.428	0.175	84.762	4.5208	4.7418	3.8215	4.0739
SNCB	NM_003085.3	1110521	5	176047473	-0.684	0.622437	-2.38	0.04331	0.62	3.89	10.411	0.249	92.71	3.9969	4.47	3.2605	3.8376
RAD17	NM_133343.1	6060386	5	68665151	-0.684	0.622437	-2.03	0.075876	0.655	3.64	1.745	0.336	96.752	3.7984	4.1612	2.8092	3.7817
ALOX12P2	NR_002710.2	1770630	17	6744081	-0.683	0.622869	-3.08	0.01455	0.587	4.61	60.704	0.156	81.561	4.9883	4.9198	4.2534	4.2888
UBL3	NM_007106.2	6620538	13	29236843	-0.683	0.622869	-2.9	0.019019	0.587	7.29	85.641	0.173	84.569	7.5098	7.7494	6.8359	7.057
CXorf21	NM_025159.1	730138	X	30577327	-0.683	0.622869	-2.57	0.031945	0.609	4	18.318	0.214	89.833	4.2992	4.3778	3.9509	3.3606
2013-03-06	NM_005885.2	780544	5	10435017	-0.683	0.622869	-2.56	0.032623	0.609	6.33	79.486	0.217	90.081	6.4844	6.8552	6.2269	5.7464
OPA3	NM_025136.1	2190048	19	50779746	-0.683	0.622869	-2.54	0.033855	0.609	4.04	21.986	0.22	90.402	4.2992	4.4609	3.3958	3.9985
LOC100133673	XM_001725120.1	2340138			-0.683	0.622869	-2.47	0.037671	0.611	5.44	72.359	0.231	91.383	5.8321	5.7229	4.7615	5.4277
LOC440934	XR_015854.1	2690228			-0.683	0.622869	-2.27	0.051643	0.621	4.1	27.56	0.27	94.017	4.6074	4.2733	3.3782	4.1368
LOC647711	XM_936771.1	4070541			-0.683	0.622869	-2.23	0.054801	0.625	3.93	12.839	0.279	94.531	3.8922	4.6457	3.3782	3.7931
C2orf90	NM_001013662.2	840224	2	903109	-0.682	0.623301	-2.87	0.020141	0.587	3.85	7.946	0.176	84.968	4.0864	4.2888	3.6514	3.3606
RXRB	NM_021976.3	6380431	6	33269394	-0.682	0.623301	-2.78	0.023127	0.599	7.4	86.32	0.186	86.566	7.776	7.7066	6.8456	7.2728
TRIM47	NM_033452.2	840528	17	73870441	-0.682	0.623301	-2.58	0.031804	0.609	7.11	84.51	0.213	89.704	7.1916	7.7003	6.6131	6.9147
FOLR1	NM_016731.2	3840709	11	71584815	-0.682	0.623301	-2.43	0.039876	0.617	5.22	70.244	0.237	91.838	5.4252	5.7063	4.5632	5.2042
LTB	NM_002341.1	5420091	6	31656512	-0.682	0.623301	-1.95	0.08532	0.664	3.97	15.918	0.357	97.239	3.9596	4.6589	4.0521	3.2023
MIRLET7C	NR_029480.1	2360634			-0.682	0.623301	-1.89	0.094613	0.669	4.35	48.809	0.381	97.732	4.4554	4.9266	3.4761	4.5414
PATE1	NM_138294.2	1440484	11	125124707	-0.682	0.623301	-1.8	0.108484	0.68	4.47	55.506	0.418	98.327	4.8943	4.7285	4.751	3.5071
MYT1L	NM_015025.2	2190358	2	1874858	-0.682	0.623301	-1.77	0.112988	0.682	4.07	24.442	0.429	98.457	3.862	4.9528	4.0624	3.3885
TUBA3C	NM_006001.1	160348	13	19748274	-0.682	0.623301	-1.67	0.131396	0.695	3.86	8.486	0.478	98.916	4.331	4.0646	4.1995	2.8326
ZNF792	NM_175872.4	2650102	19	40139192	-0.681	0.623733	-3	0.016367	0.587	5.43	72.311	0.162	82.613	5.8098	5.7333	4.9942	5.1868
OLFM1	NM_006334.3	3800204	9	137129482	-0.681	0.623733	-2.93	0.018308	0.587	4.46	55.262	0.169	83.89	4.9062	4.7051	4.2311	4.0177
TTTY19	NR_001549.1	7040653	Y	8573248	-0.681	0.623733	-2.91	0.01891	0.587	4.38	50.691	0.171	84.14	4.5688	4.8731	4.0067	4.0739
TROVE2	NM_001042369.1	360259	1	191327438	-0.681	0.623733	-2.73	0.024887	0.603	8.71	92.901	0.191	87.167	8.8301	9.2617	8.277	8.4534
LOC100131336	XR_038376.1	1850050	6	86059114	-0.681	0.623733	-2.72	0.025358	0.606	8.57	92.357	0.192	87.349	8.8312	8.994	8.0082	8.4555
BMI1	NM_005180.5	1090292	10	22659819	-0.681	0.623733	-2.69	0.026575	0.609	9.45	95.382	0.196	87.86	9.9039	9.6732	8.8853	9.3297
LOC441698	XR_019206.1	2900647			-0.681	0.623733	-2.5	0.036219	0.609	4.26	42.14	0.226	90.904	4.6005	4.6019	4.2458	3.5937
EPHA6	NM_001080448.2	5360431	3	97454860	-0.681	0.623733	-2.17	0.060415	0.634	3.9	11.124	0.29	95.096	4.3154	4.1705	3.1167	4.0082
CLEC17A	NM_207390.2	1110020	19	14582289	-0.681	0.623733	-1.86	0.098816	0.673	4.28	43.298	0.39	97.893	4.7763	4.4544	3.3618	4.5068
KIAA1012	NM_014939.2	3990504	18	27664314	-0.68	0.624165	-3.01	0.016055	0.587	7.66	87.874	0.16	82.283	8.0782	7.9309	7.3804	7.2681
ARL2BP	NM_012106.3	2570523	16	55844676	-0.68	0.624165	-2.97	0.017216	0.587	9.14	94.455	0.164	83.077	9.5201	9.4388	8.9145	8.6839
LOC727788	XM_001125756.1	4070717	1	141795292	-0.68	0.624165	-2.9	0.019234	0.587	4	18.321	0.171	84.216	4.2351	4.4391	3.78	3.5344
FAM197Y2	NR_001553.1	5870079	Y	9970916	-0.68	0.624165	-2.8	0.022302	0.595	4.18	35.24	0.182	85.878	4.4056	4.6377	3.6752	4.0082
LOC100128326	XR_036976.1	1430270	7	55779019	-0.68	0.624165	-2.8	0.022439	0.595	4.03	20.927	0.182	85.929	4.1798	4.5541	3.7694	3.6047
LOC647346	XM_936495.2	4860066			-0.68	0.624165	-2.61	0.030294	0.609	7.8	88.537	0.206	88.986	8.1545	8.1213	7.1785	7.7382
tAKR	XM_937939.1	3710301			-0.68	0.624165	-2.46	0.038563	0.615	3.94	13.457	0.231	91.279	4.1127	4.4391	3.893	3.2992
VLDLR	NM_003383.3	7000291	9	2636536	-0.68	0.624165	-1.83	0.102983	0.677	3.85	8.376	0.399	98.033	4.2433	4.1464	2.9109	4.1195
ID1	NM_181353.1	670386	20	29657653	-0.679	0.624598	-2.97	0.017051	0.587	9.6	95.804	0.163	82.808	10.0393	9.8405	9.3205	9.2004
CUEDC1	NM_017949.1	1300228	17	55940366	-0.679	0.624598	-2.96	0.017472	0.587	7.64	87.741	0.164	83.083	7.9081	8.0526	7.1988	7.4034
PREPL	NM_006036.2	3940653	2	44399027	-0.679	0.624598	-2.82	0.021674	0.593	6.96	83.623	0.179	85.435	7.1857	7.4124	6.463	6.7769
LOC100131354	XM_001719406.1	430370	1	204050645	-0.679	0.624598	-2.41	0.041311	0.618	4.07	24.852	0.237	91.855	4.3903	4.4296	3.3782	4.0847
	BX640888	450754	13	93857335	-0.679	0.624598	-2.24	0.054113	0.625	4.46	54.82	0.272	94.152	5.1211	4.47	4.384	3.8485
ZNF828	NM_032436.1	4480504	13	114110657	-0.678	0.625031	-2.93	0.018359	0.587	8.57	92.359	0.167	83.443	9.0486	8.775	8.201	8.2661
PLXNB3	NM_005393.1	4060139	X	152697649	-0.678	0.625031	-2.91	0.018849	0.587	4.22	38.216	0.168	83.733	4.7043	4.4062	3.8833	3.8711
	AJ011593	6900753	11	27738422	-0.678	0.625031	-2.83	0.021374	0.59	4.31	45.942	0.176	85.05	4.8002	4.4972	4.0803	3.862
LMO1	NM_002315.1	6980543	11	8246018	-0.678	0.625031	-2.81	0.021926	0.595	4.45	54.519	0.179	85.471	4.6646	4.9133	4.2614	3.9596
CYP2U1	NM_183075.2	4390541	4	108874179	-0.678	0.625031	-2.63	0.029507	0.609	4.53	57.742	0.203	88.582	4.86	4.8679	3.914	4.4576
TNFSF4	NM_003326.2	5690398	1	171419727	-0.678	0.625031	-2.4	0.042368	0.618	6.28	79.145	0.239	92.039	6.408	6.8276	5.6484	6.2313
LOC100130825	XM_001720026.1	5420554	12	130714865	-0.678	0.625031	-2.1	0.067953	0.646	4.08	25.346	0.307	95.776	4.3604	4.47	3.2605	4.2138
LOC650482	XM_944215.1	6220333			-0.678	0.625031	-1.63	0.141361	0.703	3.84	7.787	0.498	99.062	4.0605	4.3046	2.7958	4.2138
TBL1XR1	NM_024665.3	540082	3	178222096	-0.677	0.625465	-3.01	0.01609	0.587	5.88	76.094	0.158	81.79	6.3031	6.1363	5.5471	5.5374
MIR296	NR_029844.1	5910360			-0.677	0.625465	-2.89	0.019396	0.587	4.08	25.536	0.169	83.862	4.3221	4.511	3.8635	3.616
SLC10A4	NM_152679.2	7000176	4	48185684	-0.677	0.625465	-2.89	0.019616	0.587	7.04	84.095	0.17	84.008	7.2223	7.5306	6.7404	6.6588
GALNT10	NM_198321.2	2060301	5	153689346	-0.677	0.625465	-2.84	0.021021	0.59	4.48	56.082	0.175	84.76	4.9583	4.6836	4.2614	4.0266
LOC402679	XM_940439.1	1740524			-0.677	0.625465	-2.78	0.023271	0.599	4.06	23.491	0.182	85.967	4.1877	4.6019	3.6855	3.7499
KIAA0125	NM_014792.2	3780647	14	105469129	-0.677	0.625465	-2.58	0.031526	0.609	3.97	15.869	0.207	89.09	4.331	4.2808	3.914	3.344
PRSS35	NM_153362.1	5090307	6	84234889	-0.677	0.625465	-2.39	0.042581	0.618	4.44	53.939	0.239	91.999	4.7823	4.7691	3.7399	4.4576
FAM161B	NM_152445.1	1450138	14	74400986	-0.676	0.625898	-3.04	0.015474	0.587	4.07	25.085	0.154	81.133	4.3838	4.4391	3.78	3.6903
BAMBI	NM_012342.2	430050	10	28971562	-0.676	0.625898	-2.93	0.018231	0.587	7.5	86.875	0.164	83.011	7.8521	7.8167	7.0277	7.2897
ID1	NM_181353.1	580692	20	29657464	-0.676	0.625898	-2.66	0.027989	0.609	6.31	79.35	0.196	87.771	6.88	6.4124	6.0723	5.8686
LOC642922	XM_926303.1	2450484	11	2903231	-0.676	0.625898	-2.46	0.038211	0.612	4.2	36.732	0.225	90.87	4.6515	4.4214	3.5501	4.1711
LOC392232	XM_929117.1	2970136	8	73312915	-0.676	0.625898	-1.89	0.094814	0.669	3.96	15.405	0.372	97.555	4.4208	4.1785	4.1851	3.0628
LOC649094	XM_945141.1	2260451			-0.675	0.626332	-3.04	0.015413	0.587	3.99	17.944	0.153	80.756	4.3154	4.3446	3.6204	3.6903
FANCA	NM_001018112.1	1980563	16	89864975	-0.675	0.626332	-2.95	0.017728	0.587	4.49	56.249	0.162	82.63	4.9191	4.7285	4.2228	4.0739
MBOAT1	NM_001080480.1	5490414	6	20209754	-0.675	0.626332	-2.95	0.017807	0.587	6.25	78.938	0.162	82.658	6.4677	6.7114	5.9264	5.9019
LYZ	NM_000239.1	1690056	12	68032310	-0.675	0.626332	-2.93	0.018255	0.587	3.99	17.95	0.163	82.85	4.4554	4.2047	3.6204	3.6903
SPRED1	NM_152594.1	5700707	15	36433449	-0.675	0.626332	-2.91	0.018989	0.587	8.24	90.864	0.166	83.367	8.5501	8.6031	7.7592	8.044
	AL137257	4180612	1	160765587	-0.675	0.626332	-2.88	0.019733	0.587	9.52	95.588	0.169	83.809	9.7484	9.9717	9.0733	9.2965
LOC100132553	XR_038870.1	70711			-0.675	0.626332	-2.84	0.021011	0.59	4.57	59.529	0.173	84.51	5.0361	4.7818	4.3575	4.1098
ARSB	NM_198709.1	150546	5	78147573	-0.675	0.626332	-2.84	0.021134	0.59	3.54	0.76	0.173	84.455	4.0349	3.7301	3.1167	3.2992
LOC100129174	XM_001722672.1	4260670	13	47606615	-0.675	0.626332	-2.33	0.047298	0.62	4.26	42.459	0.249	92.734	4.9735	4.2305	4.0164	3.8376
CNDP1	NM_032649.5	3460037	18	70402965	-0.675	0.626332	-1.88	0.095871	0.669	3.77	4.664	0.374	97.603	4.0059	4.2047	2.8616	3.9985
TBC1D3F	XM_001134185.1	2760615	17	33358394	-0.674	0.626767	-2.87	0.019996	0.587	4.02	20.525	0.168	83.795	4.2132	4.5051	3.6204	3.7499
P15RS	NM_018170.2	270524	18	31823897	-0.674	0.626767	-2.84	0.021147	0.59	9.56	95.704	0.172	84.383	9.8805	9.9211	9.0515	9.4023
FZR1	NM_016263.2	2370338	19	3489118	-0.674	0.626767	-2.83	0.021318	0.59	4.67	62.275	0.173	84.567	5.0871	4.9266	4.4936	4.1711
MFNG	NM_002405.2	2000438	22	37865200	-0.674	0.626767	-2.76	0.023929	0.602	5.6	73.903	0.181	85.836	5.7772	6.1042	5.4012	5.1321
GAGE1	NM_001468.3	4490070	X	49257749	-0.674	0.626767	-2.29	0.050317	0.621	3.61	1.334	0.256	93.189	4.1127	3.7748	2.9109	3.6281
SLC5A12	NM_178498.2	6980671	11	26670162	-0.674	0.626767	-2.11	0.066793	0.644	4.03	21.53	0.298	95.452	4.6205	4.121	4.0945	3.2992
DLGAP1	NM_001003809.1	4040044	18	3534565	-0.674	0.626767	-1.73	0.121109	0.69	3.74	3.826	0.438	98.556	4.3387	3.8088	3.9985	2.8005
TNFRSF10B	NM_147187.1	1710014	8	22933844	-0.673	0.627201	-3.02	0.015832	0.587	5.65	74.345	0.152	80.695	6.0359	5.945	5.2973	5.3386
TTC28	XM_929318.2	6180634	22	27355541	-0.673	0.627201	-2.94	0.017929	0.587	3.95	14.493	0.16	82.34	4.3604	4.2132	3.707	3.5207
GPX8	NM_001008397.2	4730138	5	54462826	-0.673	0.627201	-2.86	0.02045	0.587	7.26	85.469	0.169	83.958	7.536	7.6583	6.7701	7.0773
LYPD3	NM_014400.2	2470524	19	48656904	-0.673	0.627201	-2.75	0.02437	0.603	5.15	69.528	0.181	85.831	5.6163	5.3568	4.6439	4.9842
SLC3A2	NM_001013251.1	2450725	11	62405013	-0.673	0.627201	-2.71	0.025627	0.607	6.37	79.778	0.185	86.433	6.7673	6.6412	5.8131	6.2502
C1orf107	NM_014388.5	1300092	1	208097076	-0.673	0.627201	-2.71	0.025778	0.608	6.16	78.213	0.187	86.6	6.631	6.3583	6.0069	5.6357
TAZ	NM_181314.1	2140736	X	153294819	-0.673	0.627201	-2.36	0.045172	0.62	4.39	51.597	0.242	92.217	4.6319	4.8312	4.413	3.7036
LOC729254	XM_001129762.1	540132	2	192387372	-0.673	0.627201	-2.15	0.062587	0.636	4.03	20.889	0.287	94.908	4.1798	4.5465	3.2776	4.1022
SMAD3	NM_005902.3	6840328	15	65274286	-0.672	0.627636	-3.01	0.016181	0.587	7.64	87.72	0.154	80.955	7.9093	8.0365	7.2843	7.3168
LOC651319	XM_944594.1	70341			-0.672	0.627636	-2.89	0.019321	0.587	4.14	31.865	0.164	83.098	4.4888	4.47	3.9509	3.6638
HRIHFB2122	NM_138632.1	4880332	22	36484062	-0.672	0.627636	-2.65	0.028408	0.609	5.27	70.699	0.193	87.498	5.8291	5.3818	4.815	5.0517
TEX14	NM_031272.3	3890156	17	56634238	-0.672	0.627636	-2.54	0.033739	0.609	4.83	65.493	0.208	89.208	5.2958	5.0418	4.2311	4.7633
WNT3	NM_030753.3	4070615	17	44841819	-0.672	0.627636	-2.32	0.047847	0.62	5.37	71.783	0.247	92.575	5.6909	5.7229	4.6552	5.4153
RNF43	NM_017763.3	2060228	17	53786311	-0.672	0.627636	-2.31	0.048501	0.62	5.04	68.328	0.249	92.746	5.4395	5.3056	4.3214	5.0791
LCE2C	NM_178429.2	5690224	1	150915575	-0.672	0.627636	-2	0.078821	0.656	4.06	23.574	0.326	96.49	3.9969	4.7896	3.3958	4.0472
TRPC2	NR_002720.1	4230746	11	3615180	-0.671	0.628071	-2.95	0.017839	0.587	3.93	12.82	0.159	82.014	4.1877	4.3375	3.6752	3.5071
LOC642077	XM_942735.1	6180008			-0.671	0.628071	-2.91	0.018879	0.587	4.39	51.35	0.162	82.639	4.6453	4.8081	4.1612	3.9503
2013-09-03	NM_019106.4	4890021	22	40724017	-0.671	0.628071	-2.89	0.019422	0.587	7.34	85.99	0.164	82.958	7.7193	7.6308	6.8685	7.1401
LOC100134794	XM_001718809.1	6550280	7	135967579	-0.671	0.628071	-2.73	0.024911	0.603	5.36	71.642	0.181	85.853	5.4783	5.9023	5.0665	4.9723
CACNA1G	NM_198396.1	2600202	17	46059482	-0.671	0.628071	-2.64	0.02869	0.609	4.36	49.268	0.193	87.434	4.528	4.8563	4.2145	3.8283
PM20D1	NM_152491.3	4040594	1	205797588	-0.671	0.628071	-2.55	0.0331	0.609	4.57	59.457	0.206	88.967	5.0022	4.8081	3.961	4.5068
LOC440059	XM_495891.2	4210468	11	89270446	-0.671	0.628071	-2.06	0.072501	0.653	3.78	5.141	0.308	95.859	4.1798	4.0552	2.9632	3.9306
	AA057423	1820537	10	89610543	-0.67	0.628507	-2.99	0.016648	0.587	4.35	48.555	0.153	80.871	4.6205	4.7418	4.0521	3.9703
LOC100129027	XM_001726404.1	110097			-0.67	0.628507	-2.94	0.017992	0.587	4.79	64.695	0.158	81.876	5.1929	5.0468	4.365	4.5347
FAM139A	NM_173678.1	3190347	7	143031309	-0.67	0.628507	-2.75	0.024141	0.603	3.84	7.552	0.179	85.418	4.2683	4.0817	3.3187	3.6903
LOC100130503	XM_001717149.1	6110397	3	35657247	-0.67	0.628507	-2.7	0.026203	0.609	3.91	11.948	0.185	86.388	4.121	4.3778	3.7694	3.3885
PDLIM1	NM_020992.2	1410010	10	97013625	-0.67	0.628507	-2.6	0.030777	0.609	7.74	88.275	0.198	88.01	8.0753	8.0818	7.1398	7.6781
OR7E91P	NR_002185.1	4830072	2	71110445	-0.67	0.628507	-2.48	0.037323	0.611	3.78	4.944	0.217	90.055	4.413	3.8088	3.5377	3.344
UTP15	NM_032175.2	1770195	5	72877654	-0.669	0.628942	-3.02	0.015997	0.587	6.26	78.99	0.15	80.172	6.5919	6.5974	5.9603	5.8913
UNC13A	NM_001080421.1	5720195	19	17716903	-0.669	0.628942	-2.98	0.016938	0.587	4.15	32.51	0.154	80.983	4.5098	4.4609	3.893	3.7391
LOC128102	XM_371285.3	5860121	1	119916260	-0.669	0.628942	-2.92	0.018597	0.587	4.05	23.125	0.159	82.139	4.413	4.3604	3.5975	3.8376
BATF	NM_006399.2	6220195	14	75082963	-0.669	0.628942	-2.69	0.026752	0.609	4.07	24.975	0.185	86.407	4.4754	4.3375	3.5157	3.9596
ARL5B	NM_178815.3	1710753	10	18966787	-0.669	0.628942	-2.66	0.027982	0.609	5.94	76.573	0.189	86.937	6.0336	6.512	5.6533	5.5543
CYP2E1	NM_000773.3	670068	10	135202405	-0.669	0.628942	-2.57	0.032422	0.609	4.24	40.622	0.202	88.52	4.7702	4.384	4.1127	3.7036
FNDC5	NM_153756.1	3390739	1	33327976	-0.669	0.628942	-2.44	0.039417	0.616	3.78	4.997	0.221	90.496	4.376	3.8485	3.6398	3.2472
BZRPL1	NM_001010873.1	7380195	6	41119805	-0.669	0.628942	-2.43	0.040002	0.617	4.33	47.329	0.222	90.616	4.331	4.9945	3.9802	4.0082
FLJ43390	NR_015358.1	3610445	14	62584287	-0.669	0.628942	-2.32	0.047945	0.62	3.86	8.49	0.244	92.391	4.413	3.9703	3.2167	3.8283
LOC651345	XM_946159.1	4210438			-0.668	0.629379	-2.81	0.021993	0.595	4.03	21.475	0.169	83.951	4.4609	4.2733	3.5501	3.8485
LOC283155	XR_037003.1	2230154			-0.668	0.629379	-2.09	0.068615	0.647	3.92	12.132	0.295	95.317	4.5414	3.9604	3.9509	3.2152
S100A10	NM_002966.1	2490195	1	150222202	-0.667	0.629815	-2.94	0.017899	0.587	11.53	98.872	0.155	81.252	11.8738	11.8597	11.2994	11.1006
HOMEZ	NM_020834.1	1980554	14	22812726	-0.667	0.629815	-2.88	0.019692	0.587	4.34	48.386	0.161	82.482	4.7303	4.6233	4.1375	3.8824
UGCG	NM_003358.1	3800647	9	113735032	-0.667	0.629815	-2.72	0.025369	0.606	5.82	75.643	0.18	85.584	5.9879	6.3176	5.3455	5.625
CENTB2	NM_012287.3	60746	3	196477153	-0.667	0.629815	-2.66	0.027861	0.609	6.67	81.792	0.187	86.644	6.8566	7.1567	6.1518	6.5272
MAGEA9	NM_005365.4	7200397	X	148677161	-0.667	0.629815	-2.48	0.037099	0.61	4.16	33.542	0.213	89.689	4.6074	4.384	3.5377	4.1195
CENPI	NM_006733.2	6250451	X	100287847	-0.667	0.629815	-2.31	0.048904	0.62	4.96	67.339	0.245	92.424	5.0619	5.5218	4.927	4.3221
LOC200030	NM_183372.3	4780279	1	146032670	-0.667	0.629815	-1.87	0.097674	0.672	4.17	34.592	0.366	97.44	4.3838	4.6305	4.3983	3.2818
C4orf15	NM_024511.4	20296	4	2200492	-0.666	0.630252	-2.98	0.016828	0.587	4.05	23.36	0.15	80.214	4.4056	4.3696	3.78	3.6638
FCRL2	NM_030764.2	6770070	1	155982443	-0.666	0.630252	-2.87	0.019982	0.587	4.34	48.491	0.162	82.575	4.5748	4.7818	3.914	4.1098
HIST1H2BO	NM_003527.4	2900180	6	27861206	-0.666	0.630252	-2.76	0.023943	0.602	4.14	31.807	0.174	84.631	4.376	4.5758	3.9802	3.6398
EIF2C3	NM_024852.2	6380601	1	36211566	-0.666	0.630252	-2.54	0.033618	0.609	4.55	58.9	0.203	88.59	5.1582	4.6161	4.313	4.1285
C10orf72	NM_001031746.2	1110201	10	49896673	-0.666	0.630252	-2.38	0.043183	0.62	4.63	61.155	0.229	91.152	5.2872	4.6377	4.4208	4.1711
LOC646458	XM_929383.1	5570500	2	217864930	-0.666	0.630252	-2.26	0.052996	0.623	3.87	9.339	0.254	93.019	4.3082	4.1014	3.9236	3.1541
PIP5K2A	NM_005028.3	7200603	10	22866077	-0.666	0.630252	-2.05	0.073395	0.653	5.92	76.388	0.305	95.717	6.0191	6.4824	6.0109	5.1578
LOC728533	XR_038917.1	2190017			-0.666	0.630252	-2.02	0.077396	0.656	3.96	15.458	0.315	96.098	4.5558	4.0355	3.2023	4.0567
LOC650638	XM_939727.1	3610224			-0.666	0.630252	-1.88	0.095434	0.669	4.12	29.675	0.359	97.281	4.2992	4.6093	4.3293	3.2472
C20orf144	NM_080825.2	4120762	20	31715326	-0.666	0.630252	-1.87	0.097442	0.672	3.6	1.27	0.364	97.387	3.8734	3.9985	3.8359	2.7042
PDLIM5	NM_001011516.1	6040608	4	95506828	-0.665	0.630689	-2.89	0.019322	0.587	5.08	68.726	0.158	81.87	5.2925	5.5218	4.6892	4.7954
HPCAL4	NM_016257.2	5220524	1	40144719	-0.665	0.630689	-2.78	0.023237	0.599	6.84	82.833	0.171	84.161	7.0314	7.3051	6.3756	6.6309
LOC647187	XR_037895.1	380709	16	32856810	-0.665	0.630689	-2.76	0.023927	0.602	4.14	31.238	0.173	84.436	4.3221	4.6161	3.9322	3.6767
C10orf140	NM_207371.3	3520343	10	21842489	-0.665	0.630689	-2.74	0.024802	0.603	6	77.11	0.176	84.997	6.458	6.2142	5.5042	5.8371
NXNL2	NM_145283.1	2690309	9	90379905	-0.665	0.630689	-2.6	0.030578	0.609	3.73	3.637	0.192	87.347	3.9116	4.2132	3.6094	3.1864
PAOX	NM_207127.1	830315	10	135054827	-0.665	0.630689	-2.49	0.03671	0.609	3.94	13.802	0.21	89.397	3.9787	4.5693	3.5271	3.6903
FGA	NM_000508.3	1470424	4	155724167	-0.665	0.630689	-1.44	0.185546	0.73	3.67	2.316	0.599	99.513	4.0605	3.9503	2.5195	4.1612
PPPDE1	NM_016076.3	3870255	1	242938451	-0.664	0.631126	-2.98	0.016964	0.587	8.39	91.575	0.149	79.937	8.6659	8.7762	8.0465	8.0683
LOC100134644	XM_001721285.1	1090091	7	73662574	-0.664	0.631126	-2.83	0.021315	0.59	3.85	7.919	0.164	82.943	4.0518	4.3046	3.6094	3.4194
NUAK1	NM_014840.2	7210497	12	106457219	-0.664	0.631126	-2.71	0.025847	0.609	6.85	82.935	0.178	85.275	7.2888	7.0821	6.7102	6.3327
PLSCR1	NM_021105.1	3890609	3	147729187	-0.664	0.631126	-2.68	0.026864	0.609	5.05	68.455	0.181	85.789	5.5338	5.2271	4.5506	4.882
ABCB10	NM_012089.1	4810048	1	227719373	-0.664	0.631126	-2.63	0.029227	0.609	7.5	86.89	0.187	86.716	7.8256	7.8352	6.9199	7.4136
LOC728318	XM_001714684.1	4200278			-0.664	0.631126	-2.55	0.033081	0.609	4.34	48.282	0.199	88.203	4.4679	4.8808	3.8215	4.1983
SDHALP1	NR_003264.1	5910187			-0.663	0.631564	-2.96	0.017557	0.587	6.34	79.585	0.15	80.238	6.6781	6.662	5.9319	6.0824
LOC100133669	XM_001720809.1	6280315			-0.663	0.631564	-2.95	0.017803	0.587	4.52	57.725	0.151	80.458	4.8388	4.8731	4.2758	4.1098
SLC12A2	NM_001046.2	830022	5	127522672	-0.663	0.631564	-2.83	0.021238	0.59	6.1	77.826	0.163	82.776	6.4763	6.3929	5.9213	5.6216
LOC647719	XM_936779.1	460605			-0.663	0.631564	-2.83	0.021291	0.59	4.39	51.271	0.162	82.747	4.7303	4.7123	3.9035	4.2138
ITGB5	NM_002213.3	5360243	3	125965004	-0.663	0.631564	-2.45	0.038684	0.615	5.86	75.948	0.213	89.647	6.1519	6.2339	5.2176	5.843
TMEM194B	NM_001142645.1	3520201	2	191371995	-0.662	0.632002	-2.98	0.016801	0.587	4.26	41.858	0.147	79.482	4.5748	4.6019	3.893	3.9596
CCNY	NM_145012.3	5310605	10	35899004	-0.662	0.632002	-2.91	0.018924	0.587	8.83	93.354	0.154	81.044	9.262	9.0565	8.4592	8.5356
LOC100130386	NM_001137672.1	6130709			-0.662	0.632002	-2.53	0.034236	0.609	3.59	1.173	0.2	88.361	4.0945	3.7526	3.0332	3.4891
CTNNA2	NM_004389.2	4610692	2	80729162	-0.662	0.632002	-2.39	0.042942	0.62	4.18	35.472	0.223	90.699	4.4412	4.5886	4.1851	3.5207
LOC652552	XM_942051.1	1070154			-0.662	0.632002	-2.22	0.056391	0.625	4.02	20.69	0.258	93.28	4.0945	4.6161	3.3782	4.0082
BCL11A	NM_138553.1	7330504	2	60626653	-0.662	0.632002	-2.14	0.06358	0.638	4.03	21.164	0.275	94.358	4.3154	4.4062	3.2605	4.1368
MFSD2B	NM_001080473.1	2650131	2	24100026	-0.662	0.632002	-1.37	0.205461	0.741	3.59	1.188	0.652	99.634	4.1557	3.6949	4.1036	2.4236
C9orf72	NM_145005.3	2510026	9	27550698	-0.661	0.63244	-2.9	0.01928	0.587	4.21	37.619	0.154	81.169	4.5748	4.5051	3.9886	3.7694
PANX3	NM_052959.2	20112	11	123994978	-0.661	0.63244	-2.9	0.019299	0.587	4.22	38.534	0.154	81.093	4.6386	4.4609	3.961	3.8173
OR8K5	NM_001004058.1	4490189	11	55683597	-0.661	0.63244	-2.54	0.033697	0.609	4.15	32.565	0.198	87.991	4.2351	4.7285	3.9509	3.6903
MAP3K5	NM_005923.3	5810600	6	136977522	-0.661	0.63244	-2.44	0.039861	0.617	4.95	67.208	0.214	89.793	4.9639	5.5954	4.6739	4.5632
LRP2BP	NM_018409.2	1110288	4	186522322	-0.661	0.63244	-2.25	0.053671	0.625	4.19	36.404	0.25	92.763	4.4609	4.5886	4.2534	3.4737
AGPAT9	NM_032717.3	2060477	4	84526603	-0.66	0.632878	-2.94	0.017946	0.587	6.82	82.772	0.149	79.994	7.076	7.2286	6.4995	6.4852
LOC100128300	XM_001725044.1	6590487			-0.66	0.632878	-2.88	0.01978	0.587	4.21	37.624	0.155	81.345	4.4335	4.6457	3.9417	3.8173
MAPK13	NM_002754.3	4280019	6	36107608	-0.66	0.632878	-2.85	0.02072	0.588	8.23	90.847	0.158	81.853	8.5369	8.5844	7.764	8.0381
TYW3	NM_138467.1	4010343	1	75003783	-0.66	0.632878	-2.85	0.020797	0.589	6.89	83.14	0.158	81.925	7.0859	7.3475	6.505	6.6089
	BX096642	510296	4	119169627	-0.66	0.632878	-2.84	0.021005	0.59	4.09	27.198	0.159	82.109	4.4208	4.4296	3.6204	3.9099
MCL1	NM_021960.3	7380100	1	150550866	-0.66	0.632878	-2.76	0.023837	0.602	6.24	78.83	0.168	83.718	6.499	6.636	5.7357	6.0793
LRRC8D	NM_018103.3	2650100	1	90173573	-0.66	0.632878	-2.67	0.027445	0.609	5.7	74.728	0.179	85.501	5.8291	6.2314	5.4707	5.2691
SLC10A4	NM_152679.2	540541	4	48185248	-0.66	0.632878	-2.62	0.029957	0.609	5.86	75.95	0.186	86.591	6.4094	5.9751	5.4118	5.6518
CHI3L2	NM_004000.2	610598	1	111586462	-0.66	0.632878	-2.61	0.030032	0.609	3.96	15.255	0.187	86.606	4.5347	4.0458	3.6752	3.5846
LOC100132652	XR_038357.1	1980551	6	84732315	-0.66	0.632878	-2.6	0.030826	0.609	4.89	66.401	0.188	86.81	5.364	5.0833	4.7759	4.3522
SOX9	NM_000346.2	4230475	17	67633576	-0.66	0.632878	-2.34	0.046378	0.62	7.6	87.529	0.23	91.232	7.8623	8.0046	6.9243	7.6228
LOC732313	XM_001132721.1	830551			-0.66	0.632878	-2.23	0.054772	0.625	4.08	26.106	0.252	92.882	4.6319	4.1963	4.0882	3.4194
EHF	NM_012153.3	5090132	11	34639394	-0.66	0.632878	-1.77	0.112641	0.682	4.16	33.006	0.393	97.931	4.4679	4.5051	3.2167	4.4354
LOC647328	XM_930397.1	4810364	2	88904028	-0.659	0.633317	-2.93	0.018272	0.587	4.38	50.617	0.149	80.072	4.6831	4.7347	4.1293	3.9703
SIKE	NM_025073.1	2230392	1	115117280	-0.659	0.633317	-2.64	0.028903	0.609	4.69	62.842	0.182	85.886	4.86	5.1849	4.193	4.5347
GPR56	NM_201524.1	4890241	16	56256163	-0.659	0.633317	-2.62	0.029977	0.609	7.33	85.882	0.185	86.382	7.6203	7.6919	6.7541	7.2403
MTUS1	NM_020749.3	7320520	8	17599076	-0.659	0.633317	-1.79	0.110071	0.681	3.86	8.865	0.384	97.771	4.2752	4.1119	2.9409	4.1285
LOC729426	XM_001721134.1	7380039			-0.658	0.633756	-2.93	0.018287	0.587	4.08	25.532	0.148	79.793	4.331	4.4829	3.729	3.7694
ZNF497	NM_198458.1	540102	19	63557855	-0.658	0.633756	-2.65	0.02853	0.609	4.23	39.823	0.18	85.692	4.6964	4.4296	4.0945	3.7146
KRTAP3-1	NM_031958.1	2350484	17	39165184	-0.658	0.633756	-2.63	0.029074	0.609	5.42	72.239	0.182	85.865	5.5338	5.9694	5.1851	5.0022
LOC644891	XM_927976.1	4880152	3	109233562	-0.658	0.633756	-2.25	0.053864	0.625	3.88	9.648	0.246	92.509	3.9011	4.511	3.3039	3.7931
LOC100132514	XM_001719344.1	4210528	11	127032869	-0.658	0.633756	-2.21	0.057015	0.625	4.11	28.382	0.255	93.081	4.8098	4.0646	3.9417	3.616
MRC2	NM_006039.3	4050593	17	58123467	-0.658	0.633756	-1.99	0.080042	0.657	4.36	49.497	0.311	95.935	4.9307	4.4473	4.4674	3.5937
LOC642933	XM_926904.1	6020180	5	106785273	-0.658	0.633756	-1.51	0.169337	0.722	3.66	2.058	0.537	99.291	3.9116	4.0646	2.5663	4.0938
MTMR9	NM_015458.3	6960014	8	11184850	-0.657	0.634196	-2.87	0.020178	0.587	7.2	85.135	0.154	81.127	7.5589	7.5006	6.7523	6.9924
DARC	NM_002036.2	50192	1	157442608	-0.657	0.634196	-2.45	0.038905	0.615	3.62	1.488	0.207	89.107	4.2433	3.6514	3.3782	3.2023
NFATC2	NM_012340.3	7150553	20	50048680	-0.657	0.634196	-1.88	0.095428	0.669	4.06	23.728	0.346	96.972	3.9503	4.8238	3.3958	4.0646
CCT6A	NM_001762.3	2600630	7	56089640	-0.656	0.634635	-2.91	0.019011	0.587	8.5	92.035	0.149	80.024	8.7528	8.899	8.2278	8.112
LOC651704	XM_940917.1	7160014			-0.656	0.634635	-2.84	0.021129	0.59	3.27	0.064	0.156	81.497	3.5755	3.6262	2.8092	3.0801
LOC652499	XM_941964.2	2350403			-0.656	0.634635	-2.53	0.034211	0.609	3.98	16.69	0.193	87.508	4.0349	4.5758	3.6949	3.6047
ARHGAP11A	NM_014783.2	990121	15	30718773	-0.656	0.634635	-2.49	0.036352	0.609	5.32	71.237	0.2	88.262	5.648	5.6449	5.2807	4.7001
FLJ30851	NM_198553.1	6660653	2	24252190	-0.656	0.634635	-2.49	0.036353	0.609	3.87	9.055	0.2	88.258	4.3838	4.0074	3.3187	3.7605
LOC648791	XR_018474.1	780075			-0.656	0.634635	-2.48	0.036855	0.61	4.19	35.701	0.201	88.446	4.2207	4.8081	3.8452	3.8711
LOC648279	XR_019614.2	7210343			-0.656	0.634635	-2.18	0.059853	0.633	4.04	21.937	0.259	93.348	3.9696	4.7623	3.8359	3.5846
PDC	NM_002597.3	2070546	1	186412978	-0.656	0.634635	-2.04	0.074326	0.655	4.11	28.829	0.294	95.259	4.069	4.8129	4.0803	3.4891
LOC285216	XM_496652.2	6960136	3	96856597	-0.656	0.634635	-1.97	0.082761	0.661	5.23	70.329	0.314	96.051	5.3966	5.7269	4.4281	5.3837
LOC100130133	XR_037134.1	5570411			-0.656	0.634635	-1.45	0.18351	0.729	4.68	62.465	0.572	99.447	4.9583	5.0515	5.1501	3.5484
LOC731835	XM_001133935.1	1820711			-0.656	0.634635	-1.33	0.219864	0.749	4.04	21.789	0.684	99.716	3.8922	4.837	4.4747	2.9425
LOC150051	XM_097792.4	2760273	21	31854530	-0.655	0.635075	-2.96	0.017484	0.587	4.95	67.21	0.144	78.637	5.2872	5.2664	4.6439	4.5991
LOC729397	XM_001716365.1	3990414			-0.655	0.635075	-2.76	0.023794	0.602	4.47	55.481	0.163	82.814	4.7702	4.8238	3.971	4.3139
GGT1	NM_013430.2	5290184	22	23309723	-0.655	0.635075	-2.76	0.023993	0.602	4.2	36.98	0.164	83.073	4.413	4.6457	3.7399	4.0082
FAM21C	NM_015262.1	2750450	10	45568668	-0.655	0.635075	-2.64	0.028608	0.609	4.27	43.114	0.177	85.181	4.376	4.8238	3.9802	3.9099
CPEB3	NM_014912.3	3610386	10	93811150	-0.655	0.635075	-2.49	0.036301	0.609	5.53	73.206	0.199	88.101	6.0029	5.7103	5.4502	4.9528
DEFB114	XM_941743.1	4150064			-0.655	0.635075	-2.3	0.049042	0.62	4.11	28.176	0.231	91.33	4.4888	4.3778	4.1375	3.4194
LOC441811	XR_018108.1	4560491			-0.655	0.635075	-2.13	0.064152	0.639	3.92	12.598	0.268	93.881	3.8191	4.6836	3.6204	3.5725
LOC100128693	XM_001719987.1	7160537	7	148617303	-0.655	0.635075	-1.89	0.094613	0.669	3.92	12.576	0.341	96.879	4.7823	3.7199	3.7181	3.4737
HECTD2	NM_173497.1	6250082	10	93213090	-0.654	0.635516	-2.89	0.019451	0.587	5.53	73.249	0.149	79.873	5.8291	5.8914	5.1152	5.2979
FLJ45340	NR_024368.1	7570653	7	128300174	-0.654	0.635516	-2.86	0.020249	0.587	4.33	47.388	0.152	80.506	4.6005	4.7123	4.1036	3.9011
LOC392459	XM_001714796.1	3400068	X	47470183	-0.654	0.635516	-2.86	0.020355	0.587	4.23	39.44	0.151	80.49	4.6576	4.4544	3.8452	3.9596
CYP24A1	NM_000782.3	6400131	20	52203887	-0.654	0.635516	-2.81	0.022101	0.595	9.73	96.153	0.157	81.624	9.9432	10.1811	9.3214	9.4957
LIMS1	XM_938773.1	990358			-0.654	0.635516	-2.73	0.025009	0.605	9.09	94.296	0.166	83.39	9.2476	9.5935	8.6939	8.8391
LOC100130716	XM_001713845.1	460500			-0.654	0.635516	-2.34	0.046366	0.62	4.03	21.505	0.224	90.758	4.3154	4.4062	4.0521	3.3606
RFX5	NM_000449.3	2490427	1	151313928	-0.654	0.635516	-2.17	0.060401	0.634	4.85	65.817	0.258	93.333	4.7763	5.5856	4.6248	4.4281
LOC340069	NM_182761.1	3850707	5	118998267	-0.654	0.635516	-2.16	0.061805	0.636	3.62	1.474	0.261	93.462	4.3527	3.5366	3.3958	3.1864
SCARNA9	NR_002569.1	6220112	11	93094373	-0.654	0.635516	-2.07	0.070476	0.65	6.55	81.023	0.282	94.675	7.3069	6.4468	6.3771	6.0694
IKZF1	NM_006060.3	730482	7	50437632	-0.654	0.635516	-2.07	0.071458	0.652	4.12	29.582	0.284	94.813	3.9878	4.9073	3.7588	3.8283
GNPDA2	NM_138335.1	7550639	4	44704601	-0.653	0.635957	-2.94	0.018069	0.587	7.25	85.399	0.143	78.529	7.5428	7.6088	6.9501	6.8966
SNORD9	NR_003029.2	1510021	14	21860310	-0.653	0.635957	-2.85	0.020588	0.587	3.85	8.035	0.152	80.572	4.2683	4.0817	3.5975	3.4461
CDT1	NM_030928.2	2630433	16	87403077	-0.653	0.635957	-2.45	0.038991	0.615	8.59	92.429	0.203	88.637	8.9485	8.8812	7.9611	8.5631
HGF	NM_001010934.1	780634	7	81380526	-0.653	0.635957	-2.38	0.043598	0.62	4.19	36.252	0.215	89.911	4.8329	4.2047	3.971	3.7605
PLEKHA2	XM_940486.1	7400685			-0.653	0.635957	-1.96	0.084925	0.663	4.07	25.079	0.315	96.132	4.5019	4.2979	4.2458	3.2472
LOC645681	XM_928690.1	4010168	8	7631782	-0.653	0.635957	-1.83	0.102927	0.677	3.87	8.933	0.358	97.26	4.3668	4.0171	4.0803	2.9972
OR1N1	NM_012363.1	380161	9	125288776	-0.652	0.636397	-2.93	0.018273	0.587	4.1	27.744	0.143	78.559	4.4754	4.3778	3.78	3.7694
MRPL50	NM_019051.1	2060152	9	103192266	-0.652	0.636397	-2.83	0.021419	0.59	9.55	95.683	0.154	80.987	9.7822	9.9738	9.133	9.3182
IFNGR2	NM_005534.2	2570291	21	33731481	-0.652	0.636397	-2.81	0.022039	0.595	9.49	95.499	0.156	81.406	9.7511	9.8902	9.0424	9.294
PTPRC	NM_002838.3	6650193	1	196938173	-0.652	0.636397	-2.51	0.03563	0.609	4.04	21.867	0.194	87.578	4.3978	4.3293	3.9886	3.4341
LOC653715	XM_933474.1	270626	22	25237095	-0.652	0.636397	-2.36	0.045069	0.62	4.42	53.221	0.218	90.197	4.751	4.7475	3.7588	4.4354
GALNTL2	NM_054110.3	1980379	3	16244827	-0.652	0.636397	-2.29	0.049778	0.621	4.17	34.206	0.23	91.226	4.3387	4.6524	3.5157	4.1711
MUC17	NM_001040105.1	7050162	7	100488594	-0.652	0.636397	-2.17	0.060454	0.634	4.21	37.882	0.255	93.115	4.5792	4.4972	3.4761	4.2972
RFX4	NM_002920.3	1690097	12	105650945	-0.652	0.636397	-2.15	0.062216	0.636	3.72	3.47	0.26	93.428	4.4484	3.6514	3.2605	3.5344
LOC644436	XM_927579.1	520703	11	62572059	-0.652	0.636397	-1.86	0.099148	0.673	4.3	45.54	0.348	97.029	4.3668	4.8943	4.4674	3.4891
ADORA1	NM_000674.1	4060519	1	201403112	-0.651	0.636839	-2.87	0.01998	0.587	6.29	79.192	0.148	79.647	6.5362	6.6918	5.9019	6.0249
ABHD4	NM_022060.2	3120014	14	22150820	-0.651	0.636839	-2.81	0.021926	0.595	5.12	69.179	0.154	81.154	5.5825	5.3056	4.8091	4.7763
SPEF2	NM_144722.3	6980630	5	35667175	-0.651	0.636839	-2.78	0.023066	0.599	4.26	41.913	0.157	81.669	4.5019	4.6646	3.8009	4.0646
	BX088936	1260048	9	29206598	-0.651	0.636839	-2.67	0.027363	0.609	4.14	31.547	0.17	84.025	4.2596	4.6716	3.7922	3.8376
ELF2	NM_006874.2	3130059	4	140198715	-0.651	0.636839	-2.6	0.030511	0.609	7.26	85.45	0.179	85.406	7.7363	7.4272	6.7515	7.1106
RTKN	NM_001015056.1	5080048	2	74653475	-0.651	0.636839	-2.54	0.033923	0.609	4.77	64.46	0.188	86.793	5.2106	4.9824	4.6845	4.2067
LOC647827	XR_018213.1	7560484			-0.651	0.636839	-2.06	0.072518	0.653	4.67	62.355	0.283	94.768	5.3376	4.6589	4.0349	4.6595
C11orf75	NM_020179.1	4900747	11	92851448	-0.65	0.63728	-2.88	0.01967	0.587	8.44	91.789	0.147	79.369	8.7339	8.8024	8.0335	8.2019
SIRPA	NM_001040023.1	1940129	20	1868371	-0.65	0.63728	-2.75	0.024106	0.603	8.42	91.692	0.16	82.279	8.8057	8.6758	7.9345	8.2463
BCL2L12	NM_001040668.1	6420379	19	50173744	-0.65	0.63728	-2.57	0.03198	0.609	9.96	96.651	0.182	85.867	10.4811	10.0853	9.4849	9.7822
C20orf86	XM_001134462.1	4040053			-0.65	0.63728	-2.05	0.073135	0.653	4.28	43.649	0.283	94.739	4.6964	4.511	3.5019	4.4062
HIF1A	NM_001530.2	6220543	14	61282171	-0.649	0.637722	-2.83	0.021538	0.591	5.8	75.537	0.151	80.369	6.0336	6.2237	5.3974	5.5624
MXRA7	NM_001008528.1	3990403	17	74672114	-0.649	0.637722	-2.81	0.022068	0.595	7.32	85.825	0.153	80.737	7.5244	7.7627	6.9302	7.0592
EPDR1	NM_017549.3	6400044	7	37957726	-0.649	0.637722	-2.77	0.02354	0.601	8.07	90.015	0.157	81.684	8.4819	8.3087	7.6138	7.8788
MOSPD2	NM_152581.2	450193	X	14848716	-0.649	0.637722	-2.51	0.035535	0.609	5.48	72.764	0.19	87.076	5.7063	5.9001	4.8987	5.4101
LOC100132088	XR_037760.1	4280563	2	130511283	-0.649	0.637722	-2.38	0.043438	0.62	3.9	11.018	0.211	89.441	4.5414	3.9099	3.5019	3.6514
CNNM2	NM_017649.3	1070605	10	104678667	-0.649	0.637722	-2.26	0.052792	0.623	4.01	19.464	0.233	91.516	4.6515	4.0171	3.4891	3.8824
C7orf52	NM_198571.1	2000735	7	100813862	-0.649	0.637722	-2.24	0.054066	0.625	4.6	60.403	0.237	91.866	4.86	4.9945	3.9035	4.6524
ANKH	XM_944214.1	2680253			-0.649	0.637722	-2.11	0.066626	0.643	3.82	6.727	0.267	93.799	4.1638	4.1293	3.9322	3.0628
FBXO30	NM_032145.4	2510048	6	146161586	-0.648	0.638164	-2.86	0.020333	0.587	6.4	79.994	0.147	79.384	6.6259	6.8243	6.0747	6.0793
C1orf162	NM_174896.2	7050719	1	111822501	-0.648	0.638164	-2.6	0.030911	0.609	4.62	60.956	0.177	85.143	4.8549	5.0361	4.0803	4.515
EHD1	NM_006795.2	1780619	11	64620296	-0.648	0.638164	-2.39	0.042563	0.618	8.83	93.343	0.207	89.039	9.3265	8.973	8.2387	8.7656
SLFNL1	NM_144990.2	5700626	1	41481334	-0.648	0.638164	-2.35	0.045326	0.62	3.99	17.518	0.214	89.765	4.5098	4.1119	3.3958	3.9306
NCAPH	NM_015341.3	3180411	2	96403053	-0.648	0.638164	-2.31	0.048699	0.62	4.3	45.402	0.222	90.599	4.6005	4.6524	4.3293	3.6281
LOC648657	XM_943417.1	620139			-0.648	0.638164	-2.24	0.054554	0.625	4.28	43.698	0.236	91.817	4.4056	4.801	3.6302	4.2808
NIPA2	NM_030922.5	4670020	15	23005565	-0.647	0.638607	-2.85	0.020652	0.587	9.49	95.494	0.147	79.429	9.8712	9.7625	9.2578	9.0816
LYN	NM_002350.1	7320551	8	57085442	-0.647	0.638607	-2.85	0.020859	0.59	7.55	87.212	0.147	79.547	7.8408	7.9067	7.3291	7.1244
LOC100131247	XR_042362.1	5860070	7	56404764	-0.647	0.638607	-2.66	0.027774	0.609	3.74	3.911	0.168	83.691	4.0157	4.1119	3.2167	3.616
MANEAL	NM_001031740.1	1470603	1	38039260	-0.647	0.638607	-2.47	0.037535	0.611	5.92	76.46	0.194	87.572	6.499	5.9961	5.4662	5.7344
	CB241739	4810711			-0.647	0.638607	-2.29	0.050209	0.621	4.04	22.197	0.225	90.83	4.2683	4.4609	4.0624	3.3734
SCARNA21	NR_003000.1	2120370	17	7750254	-0.647	0.638607	-2.1	0.067635	0.645	4.47	55.425	0.266	93.771	5.2144	4.3696	4.2534	4.037
WFDC3	NM_080614.1	1240746	20	44404090	-0.646	0.63905	-2.91	0.018748	0.587	5.08	68.762	0.14	77.862	5.3721	5.4295	4.7324	4.7763
KRT6C	NM_173086.3	5820626			-0.646	0.63905	-2.89	0.019483	0.587	3.87	8.892	0.142	78.345	4.1877	4.1877	3.6094	3.4737
NCRNA00081	NR_024142.1	4610022	10	112660280	-0.646	0.63905	-2.67	0.027453	0.609	5.96	76.738	0.165	83.246	6.1859	6.3792	5.8105	5.4633
GLRX	NM_002064.1	4590228	5	95175728	-0.646	0.63905	-2.46	0.038496	0.615	9.4	95.234	0.195	87.72	9.4414	9.997	8.9909	9.1552
DOCK8	NM_203447.1	3520202	9	454869	-0.646	0.63905	-2.34	0.046528	0.62	3.42	0.269	0.215	89.935	4.0518	3.4329	3.232	2.9598
	BU742963	830347	3	120410830	-0.646	0.63905	-1.74	0.118397	0.689	4.23	39.182	0.383	97.762	4.7943	4.3046	3.35	4.4576
ZNF605	NM_183238.2	6280435	12	132008514	-0.646	0.63905	-1.58	0.151561	0.71	3.93	13.324	0.466	98.827	4.8053	3.7088	3.1746	4.0472
WFDC3	NM_181522.1	4280048	20	43837583	-0.645	0.639493	-2.89	0.019337	0.587	6.19	78.487	0.141	77.959	6.4608	6.5644	5.8506	5.8853
	AW241826	1580376	9	38494114	-0.645	0.639493	-2.88	0.019889	0.587	4.5	56.632	0.142	78.328	4.8002	4.837	4.2458	4.1022
AUP1	NM_012103.2	1990632	2	74609631	-0.645	0.639493	-2.87	0.019954	0.587	4.39	51.102	0.143	78.514	4.7887	4.6305	4.0717	4.0567
FAM176A	NM_001135032.1	3990341	2	75720197	-0.645	0.639493	-2.79	0.022604	0.597	3.86	8.566	0.151	80.288	4.1127	4.2489	3.4207	3.6514
VSTM2A	NM_182546.2	5870091	7	54585277	-0.645	0.639493	-2.64	0.029027	0.609	4.23	39.125	0.169	83.831	4.6205	4.4759	4.1036	3.7036
SULT2B1	NM_177973.1	1940452	19	49055527	-0.645	0.639493	-2.59	0.031285	0.609	3.9	11.221	0.175	84.919	4.4269	4.0266	3.4594	3.7036
	DB043695	7200692	10	123276110	-0.645	0.639493	-2.55	0.03345	0.609	3.87	9.354	0.181	85.766	3.9596	4.4296	3.4594	3.6398
DEFB106B	NM_001040704.1	3850047	8	7340158	-0.645	0.639493	-2.51	0.035418	0.609	4.29	44.344	0.186	86.5	4.8435	4.3778	4.0945	3.8376
FRMPD2	NM_001018071.2	510167	10	49482629	-0.645	0.639493	-2.19	0.058723	0.629	4.22	38.532	0.243	92.308	4.9372	4.1464	3.893	3.9011
LOC644473	XM_927604.1	3170414	X	18809	-0.645	0.639493	-1.81	0.106275	0.679	3.91	11.524	0.354	97.178	4.2752	4.1877	3.0198	4.1527
GRM7	NM_181875.1	4760670	3	7710320	-0.645	0.639493	-1.73	0.121008	0.69	3.83	6.995	0.389	97.859	4.285	4.0171	4.1036	2.9085
SPRED3	NM_001042522.1	1740603	19	38885415	-0.645	0.639493	-1.62	0.142912	0.704	4.36	49.141	0.442	98.588	4.2433	5.1114	3.5157	4.5491
PM20D2	NM_001010853.1	50470	6	89874733	-0.644	0.639936	-2.68	0.027245	0.609	6.71	82.058	0.163	82.935	7.0051	7.0603	6.5804	6.1964
CGN	NM_020770.1	1980670	1	149777635	-0.644	0.639936	-2.53	0.034176	0.609	7.39	86.28	0.182	85.891	7.9459	7.4804	6.9641	7.1745
LOC645942	XM_928913.1	2060735	17	24942243	-0.644	0.639936	-2.51	0.035629	0.609	4.36	49.288	0.186	86.486	4.413	4.9448	4.0521	4.0177
KCND3	NM_172198.1	3440242	1	112326515	-0.644	0.639936	-2.48	0.037089	0.61	3.98	17.351	0.189	86.934	4.4609	4.1534	3.893	3.4341
SLC5A7	NM_021815.2	1010097	2	107996654	-0.644	0.639936	-2.47	0.037906	0.612	3.39	0.199	0.192	87.286	3.4307	3.9886	3.0198	3.1112
ANTXR1	NM_053034.1	3120689	2	69203712	-0.644	0.639936	-2.33	0.046853	0.62	5.01	67.998	0.214	89.782	5.4783	5.1849	4.384	4.9904
	DB304963	4200528	3	122625850	-0.644	0.639936	-2.28	0.050815	0.621	3.96	14.882	0.224	90.75	4.3154	4.2395	3.2776	3.9886
LOC100130800	XM_001719118.1	7400242	1	110516516	-0.644	0.639936	-2.23	0.055162	0.625	3.99	17.762	0.233	91.554	3.9409	4.6836	3.5975	3.7391
FAM70B	XM_001130122.1	3440563			-0.643	0.64038	-2.47	0.037871	0.612	4.8	64.947	0.191	87.172	5.1929	5.0515	4.751	4.2067
	BQ016124	2630471	2	238259888	-0.643	0.64038	-2.34	0.0466	0.62	3.81	6.36	0.212	89.556	4.2992	3.9703	3.2023	3.7817
LOC100129876	XM_001714628.1	1260671			-0.643	0.64038	-2.22	0.055629	0.625	4	18.363	0.233	91.533	4.6576	3.9802	3.8452	3.5071
LOC642537	XM_926026.1	1070008	1	95437	-0.643	0.64038	-2.17	0.060437	0.634	3.92	12.032	0.245	92.46	4.0349	4.4391	3.2472	3.94
LOC731007	XM_001132080.1	1850402			-0.643	0.64038	-1.58	0.152337	0.71	4.63	61.337	0.462	98.795	4.5208	5.3928	4.8586	3.7694
CREBL2	NM_001310.2	6220377	12	12689183	-0.642	0.640824	-2.9	0.019169	0.587	4.79	64.843	0.137	77.229	5.1262	5.1052	4.4609	4.4872
C1orf19	NM_052965.1	3870112	1	182309649	-0.642	0.640824	-2.66	0.028002	0.609	7.57	87.332	0.163	82.869	7.7322	8.0541	7.1381	7.365
FGFR1	NM_023106.2	6770128	8	38434170	-0.642	0.640824	-2.48	0.037086	0.61	3.85	8.257	0.187	86.67	3.9409	4.4062	3.6752	3.3885
FLJ20273	NM_019027.1	7380626	4	40120673	-0.642	0.640824	-2.31	0.048353	0.62	5.74	75.002	0.216	89.949	6.0886	6.0261	5.0742	5.7556
CHORDC1	NM_012124.1	2370674	11	89574441	-0.642	0.640824	-2.2	0.057979	0.627	4.83	65.474	0.238	91.921	4.8238	5.4816	4.7169	4.3046
FAM13A	NM_001015045.1	4540376	4	89867383	-0.641	0.641268	-2.84	0.021118	0.59	5.47	72.702	0.143	78.516	5.8819	5.7024	5.1809	5.1208
LOC644743	XR_016703.1	20044	1	44341805	-0.641	0.641268	-2.83	0.021472	0.591	9.83	96.367	0.144	78.696	10.0565	10.2528	9.4878	9.5397
LOC643918	XM_933328.1	4070129	18	35585293	-0.641	0.641268	-2.63	0.029509	0.609	5.67	74.453	0.166	83.426	5.7957	6.1775	5.2571	5.4344
A2BP1	NM_145891.1	1580181	16	7666834	-0.641	0.641268	-1.81	0.107247	0.68	4.02	20.349	0.35	97.078	4.3838	4.2979	3.1361	4.2634
SMEK1	NM_032560.4	940154	14	91976569	-0.64	0.641713	-2.89	0.019577	0.587	3.86	8.835	0.138	77.282	4.2207	4.1464	3.5377	3.5484
GPR180	NM_180989.4	3180563	13	94079051	-0.64	0.641713	-2.8	0.022359	0.595	7.09	84.364	0.145	79.035	7.3451	7.4656	6.6673	6.8643
C17orf44	NM_173621.1	5810167	17	8064965	-0.64	0.641713	-2.75	0.024176	0.603	4.87	66.141	0.151	80.339	5.2872	5.1002	4.4412	4.6664
GPR56	NM_201525.1	5490768	16	56256102	-0.64	0.641713	-2.74	0.024734	0.603	7.19	85.052	0.152	80.648	7.5558	7.4592	6.7217	7.0139
KLF11	XM_001129527.1	3360731			-0.64	0.641713	-2.73	0.024894	0.603	5.19	69.946	0.153	80.718	5.3831	5.6449	4.79	4.9589
LOC201175	NM_174919.2	7330070	17	40862551	-0.64	0.641713	-2.69	0.026434	0.609	5.5	72.99	0.157	81.739	5.9446	5.7063	5.055	5.3155
	T56469	4280121	2	98427378	-0.64	0.641713	-2.58	0.031461	0.609	3.9	11.253	0.171	84.15	4.3668	4.0817	3.4083	3.7605
SCHIP1	NM_014575.2	630465	3	159609932	-0.64	0.641713	-2.57	0.032432	0.609	5.92	76.45	0.173	84.582	6.0257	6.4602	5.6927	5.5132
VEGFB	NM_003377.3	5700201	11	63761516	-0.64	0.641713	-2.53	0.034564	0.609	4.43	53.418	0.179	85.531	4.6136	4.8808	4.3214	3.8922
	DA830074	4480270	7	81168066	-0.64	0.641713	-2.2	0.057627	0.627	3.76	4.393	0.235	91.711	3.7669	4.3921	3.6629	3.2152
CSH2	NM_022644.2	130719	17	59303195	-0.64	0.641713	-2.1	0.0678	0.646	4.17	33.777	0.258	93.288	4.069	4.9012	3.7507	3.94
GABRR1	NM_002042.2	5080722	6	89944888	-0.64	0.641713	-2.04	0.07456	0.655	4.11	29	0.273	94.226	3.9878	4.8808	3.7181	3.8711
SIK1	NM_173354.3	4920164	21	44834946	-0.639	0.642158	-2.88	0.019905	0.587	4.87	66.065	0.138	77.267	5.2042	5.1715	4.5057	4.5917
LOC650990	XM_945847.1	2710273			-0.639	0.642158	-2.87	0.019935	0.587	4.01	19.837	0.137	77.189	4.3387	4.3293	3.6514	3.7391
	BX111356	5270593	6	72087678	-0.639	0.642158	-2.86	0.02038	0.587	4.09	27.097	0.139	77.644	4.3668	4.4609	3.8215	3.7273
ERCC1	NM_001983.2	3610474	19	50618911	-0.639	0.642158	-2.82	0.021866	0.595	5.42	72.213	0.143	78.525	5.8239	5.6533	5.1579	5.0418
MMD	NM_012329.2	5550431	17	53470363	-0.639	0.642158	-2.81	0.022026	0.595	8.02	89.767	0.144	78.719	8.2416	8.4291	7.643	7.7494
TTTY9B	NR_002159.1	3780678	Y	20743475	-0.639	0.642158	-2.67	0.027679	0.609	3.94	13.862	0.16	82.289	4.2752	4.2489	3.8112	3.4341
TP53INP1	NM_033285.2	6660630	8	96007891	-0.639	0.642158	-2.66	0.027816	0.609	7.1	84.461	0.16	82.361	7.3319	7.5035	6.6082	6.9484
	AI796409	5690189	2	123138905	-0.639	0.642158	-2.66	0.027881	0.609	4.15	32.415	0.16	82.272	4.6576	4.2808	3.854	3.807
LOC646515	XM_929439.1	130615	4	142746425	-0.639	0.642158	-2.59	0.031039	0.609	4.22	38.934	0.169	83.847	4.3527	4.7347	4.0164	3.7931
ABCG1	NM_207174.1	6450059	21	42513173	-0.639	0.642158	-2.55	0.033158	0.609	4.22	38.307	0.174	84.667	4.4269	4.6457	3.6855	4.1098
SOHLH2	NM_017826.1	10528	13	35640614	-0.639	0.642158	-2.51	0.035199	0.609	4.03	20.988	0.18	85.626	4.4554	4.2395	3.4761	3.94
AMHR2	NM_020547.1	5420152	12	52111472	-0.639	0.642158	-2.4	0.042039	0.618	4.42	53.334	0.196	87.838	4.8943	4.595	3.8452	4.3668
SEC61A2	NM_018144.2	5700364	10	12246596	-0.639	0.642158	-2	0.078789	0.656	4.94	67.151	0.282	94.717	5.1929	5.3339	5.0869	4.1612
MYBPC1	NM_206820.1	4230563	12	100584657	-0.639	0.642158	-1.39	0.201061	0.738	3.86	8.753	0.585	99.479	4.4609	3.9011	2.7711	4.3139
MAOA	NM_000240.2	6550528	X	43490870	-0.638	0.642603	-2.8	0.022313	0.595	7.43	86.452	0.143	78.614	7.7083	7.7827	7.0056	7.2101
DICER1	NM_030621.2	5130091	14	94623147	-0.638	0.642603	-2.72	0.025267	0.606	6.98	83.784	0.153	80.722	7.2573	7.3448	6.8147	6.5106
TMEM51	NM_018022.1	380102	1	15419242	-0.638	0.642603	-2.69	0.026511	0.609	9.14	94.478	0.156	81.394	9.6035	9.3214	8.7245	8.9244
EPHA2	NM_004431.2	6510332	1	16451294	-0.638	0.642603	-2.65	0.02818	0.609	7.04	84.089	0.16	82.334	7.5457	7.1665	6.7483	6.6876
CDH8	NM_001796.2	940193	16	61687573	-0.638	0.642603	-2.63	0.029197	0.609	3.91	11.88	0.163	82.799	4.2683	4.1963	3.3958	3.7931
VAMP1	NM_199245.1	4060110	12	6573777	-0.638	0.642603	-2.63	0.029323	0.609	4.38	50.74	0.163	82.905	4.7702	4.6305	4.2534	3.8711
FTMT	NM_177478.1	2630646	5	121188189	-0.638	0.642603	-2.29	0.050253	0.621	3.96	14.941	0.215	89.863	3.9878	4.5618	3.4461	3.8283
GLB1L3	NM_001080407.2	3060475	11	134189124	-0.638	0.642603	-2.06	0.0727	0.653	3.67	2.31	0.266	93.786	4.1127	3.8703	3.78	2.9275
MAGEC3	NM_138702.1	4120220	X	140810958	-0.638	0.642603	-1.91	0.090567	0.667	3.74	3.993	0.308	95.837	3.7336	4.3921	3.8112	3.0377
LAMA4	NM_002290.2	5130435	6	112537188	-0.638	0.642603	-1.91	0.0916	0.667	3.74	3.896	0.31	95.899	4.0253	4.0924	2.9109	3.9306
LOC728650	XR_042472.1	6200228			-0.638	0.642603	-1.59	0.149374	0.708	4.39	51.6	0.446	98.632	5.3069	4.121	4.413	3.7391
LOC652489	XM_941950.2	6650228			-0.637	0.643049	-2.81	0.022176	0.595	9.69	96.037	0.142	78.353	10.0932	9.9172	9.3146	9.4224
LOC644024	XM_927269.1	20564	2	174227241	-0.637	0.643049	-2.77	0.023665	0.601	4.31	45.642	0.147	79.48	4.7436	4.5051	4.0437	3.9306
SNORD111	NR_003079.1	7400332	16	69129453	-0.637	0.643049	-2.76	0.023957	0.602	4.05	23.387	0.147	79.585	4.2924	4.4544	3.8452	3.6281
FCF1	NM_015962.4	1990402	14	74272648	-0.637	0.643049	-2.69	0.026576	0.609	6.24	78.866	0.155	81.279	6.7326	6.3889	5.9213	5.926
C14orf129	NM_016472.3	5700301	14	95922696	-0.637	0.643049	-2.62	0.029827	0.609	7.35	86.022	0.164	83.032	7.561	7.7675	6.8475	7.2064
TSPAN33	NM_178562.2	4250753	7	128784758	-0.637	0.643049	-2.43	0.040205	0.617	7.25	85.427	0.191	87.146	7.5551	7.5875	6.6468	7.2208
LOC652760	XM_942393.1	3520348			-0.637	0.643049	-2.37	0.044449	0.62	4.59	60.047	0.2	88.368	4.7374	5.0778	4.5327	4.0082
SRI	NM_198901.1	5290242	7	87856255	-0.637	0.643049	-2.29	0.050493	0.621	3.68	2.5	0.215	89.852	3.8292	4.1705	3.6629	3.0628
SIAH3	NM_198849.2	3060600	13	46354500	-0.637	0.643049	-1.92	0.090079	0.667	4.19	35.854	0.305	95.723	4.7823	4.2305	4.2918	3.4461
LOC645094	XR_039085.1	3850025			-0.636	0.643495	-2.86	0.020505	0.587	6.82	82.727	0.136	76.952	7.1522	7.1139	6.4507	6.544
LOC728431	XM_001132105.2	4210376			-0.636	0.643495	-2.85	0.020821	0.589	5.21	70.109	0.138	77.28	5.5319	5.5282	4.829	4.9589
OR13C9	NM_001001956.1	4120608	9	107379769	-0.636	0.643495	-2.56	0.032595	0.609	4.37	50.17	0.17	84.032	4.9191	4.4609	4.0437	4.0646
ZNF100	NM_173531.1	7100110	19	21697763	-0.636	0.643495	-2.29	0.050418	0.621	3.84	7.374	0.214	89.75	4.1557	4.1534	3.1746	3.862
AXL	NM_021913.2	6480703	19	46459226	-0.635	0.643941	-2.86	0.020533	0.587	6.88	83.13	0.136	76.899	7.1666	7.2395	6.6011	6.5344
ZFP64	NM_199426.1	4670328	20	50776685	-0.635	0.643941	-2.82	0.021714	0.593	4.5	56.882	0.14	77.707	4.9062	4.7347	4.1995	4.1711
	AI984350	4860072	X	106066612	-0.635	0.643941	-2.81	0.022205	0.595	4.33	47.784	0.14	77.913	4.5558	4.7475	4.026	4.0082
ARTN	NM_057091.1	1850246	1	44172469	-0.635	0.643941	-2.8	0.022402	0.595	4.08	25.644	0.141	78.065	4.4484	4.3446	3.6752	3.8485
GSTT2	NM_000854.2	7570762	22	22654881	-0.635	0.643941	-2.65	0.028249	0.609	6.51	80.744	0.158	81.796	6.7187	6.9443	6.0477	6.3451
LOC100131765	XR_037587.1	2360170			-0.635	0.643941	-1.96	0.084217	0.662	3.9	11.298	0.289	95.05	3.8503	4.595	3.893	3.2818
STEAP1	XM_940149.1	4040608			-0.635	0.643941	-1.83	0.103502	0.678	4.25	41.57	0.333	96.686	4.6964	4.4473	4.4674	3.4058
LOC100128140	XR_037026.1	2260022	17	507033	-0.634	0.644387	-2.87	0.020197	0.587	3.71	3.112	0.134	76.382	4.0253	4.0266	3.3958	3.3885
TRIM55	NM_184085.1	60743	8	67087397	-0.634	0.644387	-2.8	0.022445	0.595	3.81	6.373	0.141	78.036	4.1798	4.0817	3.4083	3.5846
ESX1	NM_153448.2	4260343	X	103494973	-0.634	0.644387	-2.76	0.023718	0.601	4.14	31.676	0.144	78.724	4.5792	4.3375	3.8009	3.8485
LOC154872	NM_001024603.1	5870167	7	124217944	-0.634	0.644387	-2.65	0.028262	0.609	4.09	26.487	0.156	81.559	4.5208	4.2888	3.914	3.6281
GPR109A	NM_177551.3	3830228	12	123186733	-0.634	0.644387	-2.64	0.028836	0.609	3.78	5.028	0.158	81.893	3.9696	4.2216	3.3187	3.6047
MYO1H	NM_001101421.2	6020609	12	108370146	-0.634	0.644387	-2.59	0.031191	0.609	4.46	55.252	0.165	83.155	4.8661	4.6978	3.9509	4.3446
ZNF66	XM_001719758.1	5910435	19	20878109	-0.634	0.644387	-2.42	0.0406	0.618	4	18.611	0.188	86.786	4.1798	4.4544	3.9322	3.4341
LOC100132540	XM_001723375.1	5050739	16	16392894	-0.633	0.644834	-2.78	0.022981	0.599	4.29	44.333	0.142	78.224	4.6074	4.6019	4.0803	3.862
ARHGEF15	NM_173728.2	3610601	17	8166286	-0.633	0.644834	-2.78	0.023264	0.599	3.56	0.921	0.142	78.29	3.8922	3.8703	3.1361	3.3606
KDELR3	NM_006855.2	3360053	22	37208995	-0.633	0.644834	-2.59	0.03108	0.609	8.18	90.542	0.163	82.882	8.5066	8.4755	7.648	8.0683
RAP1GDS1	NM_021159.3	730035	4	99433638	-0.633	0.644834	-2.48	0.03714	0.61	5.96	76.712	0.179	85.421	6.2134	6.3339	5.3877	5.8932
AMPH	NM_001635.2	4040152	7	38538692	-0.633	0.644834	-1.84	0.102261	0.677	4.1	27.772	0.326	96.498	4.413	4.4214	3.2472	4.3221
XAGE-4	XM_932510.1	670451	X	55695457	-0.632	0.645281	-2.74	0.024771	0.603	3.99	17.889	0.145	78.988	4.376	4.2395	3.7922	3.5603
TMEM30B	NM_001017970.2	670754	14	61744887	-0.632	0.645281	-2.68	0.027007	0.609	3.95	14.389	0.152	80.559	4.3838	4.1464	3.5157	3.7499
LOC152118	XM_098163.3	4920341	3	154685097	-0.632	0.645281	-2.6	0.030884	0.609	4.19	35.682	0.162	82.672	4.5748	4.4296	3.6752	4.0646
LOC100049716	XR_041968.1	2600471			-0.632	0.645281	-2.54	0.03388	0.609	4.08	25.477	0.169	83.907	4.1705	4.6161	3.6949	3.8283
MGLL	NM_001003794.1	3400546	3	129024622	-0.632	0.645281	-2.49	0.036607	0.609	4.17	33.81	0.176	85.025	4.5491	4.414	4.0945	3.6047
LOC100132942	XR_042340.1	6940347	1	14912612	-0.632	0.645281	-2.16	0.061366	0.636	3.86	8.748	0.234	91.584	3.8292	4.526	3.7181	3.3734
CD8B	NM_004931.3	4210753	2	87080121	-0.632	0.645281	-2	0.079667	0.657	3.6	1.194	0.275	94.317	3.8922	3.9306	3.7399	2.819
LRRC52	NM_001005214.2	4540082	1	163799559	-0.632	0.645281	-1.55	0.15862	0.716	3.69	2.649	0.457	98.753	4.1375	3.8703	2.6879	4.0567
TCL1B	NM_199206.1	5720047	14	95227816	-0.631	0.645729	-2.84	0.021113	0.59	3.42	0.271	0.135	76.52	3.6885	3.7853	3.1167	3.0943
PDX1	NM_000209.3	4120427	13	28500098	-0.631	0.645729	-2.78	0.023197	0.599	5.79	75.427	0.14	77.828	6.0095	6.202	5.4323	5.5175
FOXH1	NM_003923.1	5130180	8	145670729	-0.631	0.645729	-2.66	0.028042	0.609	4.82	65.281	0.153	80.9	5.0871	5.1849	4.6739	4.3362
LOC730038	XM_001134271.2	2230307	15	26834200	-0.631	0.645729	-2.55	0.033365	0.609	4.34	48.35	0.167	83.49	4.5748	4.7418	4.2382	3.8173
UBE2T	NM_014176.2	2480722	1	200568772	-0.631	0.645729	-2.52	0.034763	0.609	9.33	95.058	0.171	84.152	9.4899	9.8061	8.8383	9.1956
LOC391081	XR_019377.1	2600482			-0.631	0.645729	-2.45	0.039198	0.616	4.17	34.081	0.181	85.795	4.4412	4.526	3.5866	4.1195
	BX647520	3800424	12	68259740	-0.631	0.645729	-2.39	0.042998	0.62	6.36	79.687	0.191	87.231	6.7123	6.6307	5.7474	6.3327
	BE466563	4730338	1	210737445	-0.631	0.645729	-2.37	0.044351	0.62	4.51	57.003	0.194	87.58	5.0471	4.595	4.3915	3.9886
OR1S1	NM_001004458.1	1740048	11	57739464	-0.631	0.645729	-2.36	0.044983	0.62	4.07	24.467	0.195	87.705	4.515	4.2489	3.4761	4.0266
ARHGAP6	NM_013423.2	3130646	X	11187663	-0.631	0.645729	-2.12	0.065953	0.641	4.27	42.773	0.243	92.291	4.6205	4.5465	4.3575	3.5484
C1QTNF4	NM_031909.1	6520056	11	47568269	-0.631	0.645729	-2.01	0.077911	0.656	3.82	6.646	0.27	93.981	3.9011	4.3696	3.1167	3.8922
ACBD7	XM_928013.1	630678	10	15157561	-0.63	0.646176	-2.81	0.02216	0.595	6.12	77.97	0.137	77.036	6.4474	6.4309	5.7299	5.8878
HCCS	NM_005333.2	3440544	X	11050956	-0.63	0.646176	-2.78	0.023022	0.599	5.6	73.843	0.139	77.631	5.9228	5.9023	5.3819	5.1822
AK3L1	NM_013410.2	160148	1	65465577	-0.63	0.646176	-2.57	0.032011	0.609	8.5	92.043	0.163	82.829	8.8231	8.8087	7.9716	8.3997
PHF14	NM_014660.2	2230025	7	11030333	-0.63	0.646176	-2.57	0.03209	0.609	4.18	35.127	0.163	82.91	4.3527	4.6377	4.026	3.7036
ARFIP1	NM_001025595.1	4220484	4	153791909	-0.63	0.646176	-2.56	0.032609	0.609	4.58	59.92	0.164	83.056	4.7569	5.0418	4.1036	4.4354
U2AF1L2	NM_005089.1	5260692	X	15751200	-0.63	0.646176	-2.5	0.036097	0.609	6.85	82.931	0.173	84.508	7.1435	7.1912	6.2914	6.7832
RFC3	NM_002915.3	3890309	13	33309319	-0.63	0.646176	-2.45	0.038974	0.615	7.28	85.609	0.18	85.673	7.8539	7.3383	6.8922	7.0392
LOC100133435	XM_001715771.1	6580746			-0.63	0.646176	-2.38	0.043581	0.62	4.92	66.757	0.191	87.153	5.446	5.0201	4.8091	4.3978
RUFY1	NM_025158.3	2680646	5	178910256	-0.63	0.646176	-2.38	0.043708	0.62	3.96	14.935	0.191	87.216	4.0157	4.526	3.4891	3.7931
LOC644241	XM_933648.1	1710064	6	138230793	-0.63	0.646176	-2.33	0.04723	0.62	4.19	35.989	0.199	88.213	4.7043	4.3046	4.121	3.6281
RGPD1	NM_001024457.1	2970634	2	87067153	-0.63	0.646176	-1.96	0.084755	0.663	4.13	30.222	0.283	94.77	3.9696	4.9133	3.8734	3.7499
VNN2	NM_004665.2	7100161	6	133120672	-0.63	0.646176	-1.85	0.100031	0.673	3.93	12.725	0.317	96.231	4.2683	4.2132	3.0844	4.1368
LOC650062	XM_939151.1	2680068			-0.63	0.646176	-1.64	0.138167	0.701	3.93	12.841	0.404	98.107	4.7436	3.7409	3.2167	4.0082
EXT2	NM_207122.1	6760070	11	44176134	-0.629	0.646624	-2.83	0.021433	0.59	7.67	87.889	0.134	76.357	7.9987	7.9646	7.4003	7.304
KLC3	NM_177417.1	2340500	19	50546060	-0.629	0.646624	-2.69	0.026676	0.609	6.18	78.4	0.148	79.776	6.4315	6.5543	6.0069	5.7202
LOC732215	XR_015772.1	3290278			-0.629	0.646624	-2.49	0.036357	0.609	4.22	38.426	0.172	84.389	4.7043	4.3604	4.0803	3.7273
DUB4	XR_039891.1	1260132			-0.629	0.646624	-2.47	0.037763	0.611	4.13	30.942	0.176	84.957	4.3082	4.5886	4.0349	3.6047
BMP7	NM_001719.1	3170100	20	55179001	-0.629	0.646624	-2.31	0.048655	0.62	5.41	72.156	0.201	88.459	5.7742	5.6828	4.7802	5.4198
MESTIT1	NR_004382.1	520139	7	130127363	-0.629	0.646624	-2.31	0.048879	0.62	3.96	15.644	0.202	88.567	3.9969	4.5618	3.8112	3.4891
PACRG	NM_152410.1	6580600	6	163656436	-0.629	0.646624	-2.25	0.053627	0.625	3.64	1.793	0.213	89.653	3.9409	3.9703	3.6752	2.9788
HNMT	NM_006895.2	6840286	2	138489738	-0.629	0.646624	-2.09	0.069211	0.647	4.87	66.048	0.248	92.638	5.2723	5.0895	4.1453	4.9589
RIC3	NM_024557.2	1580114	11	8087430	-0.629	0.646624	-2.03	0.075381	0.655	4.16	33.302	0.261	93.502	4.0349	4.9133	3.8833	3.807
OLR1	NM_002543.3	7510132	12	10311172	-0.629	0.646624	-1.99	0.080786	0.658	3.84	7.338	0.273	94.211	4.1127	4.1877	3.9802	3.0628
HMOX2	NM_002134.2	4230347	16	4500153	-0.629	0.646624	-1.96	0.083964	0.662	5.12	69.183	0.28	94.571	5.3874	5.4781	4.3351	5.2733
LOC646026	XM_933344.1	130575	17	60208411	-0.628	0.647073	-2.74	0.024616	0.603	4.33	47.175	0.142	78.171	4.7628	4.5177	4.0067	4.0177
LOC653219	XM_927237.1	4390386	X	52256096	-0.628	0.647073	-2.73	0.025133	0.606	4.25	41.189	0.143	78.44	4.6576	4.47	3.8452	4.0266
ZBED1	NM_004729.3	4180468	Y	2417070	-0.628	0.647073	-2.7	0.026193	0.609	7.58	87.404	0.145	79.075	7.8814	7.9091	7.4123	7.123
MIR203	NR_029620.1	2360369			-0.628	0.647073	-2.7	0.026415	0.609	4.25	40.958	0.146	79.359	4.6319	4.4899	3.8009	4.0646
SPRR2C	NR_003062.1	6550356	1	153112804	-0.628	0.647073	-2.55	0.033332	0.609	3.71	3.182	0.164	83.085	3.9596	4.0924	3.6094	3.1864
LOC646096	XM_929060.2	4280097	15	18750558	-0.628	0.647073	-2.23	0.05481	0.625	4.03	20.965	0.215	89.901	4.2992	4.384	3.3618	4.0646
HCFC1R1	NM_001002018.1	50088	16	3072632	-0.628	0.647073	-1.9	0.092228	0.667	6.91	83.348	0.297	95.399	7.3513	7.1056	6.1173	7.0836
LOC100128564	XM_001725686.1	6220707			-0.628	0.647073	-1.81	0.106489	0.679	4	18.839	0.329	96.585	4.2047	4.4296	3.156	4.2216
GOLPH4	NM_014498.2	5870221	3	169209931	-0.627	0.647521	-2.79	0.02294	0.599	7.09	84.381	0.136	76.78	7.3251	7.4771	6.7368	6.812
T	NM_003181.2	10719	6	166571622	-0.627	0.647521	-2.73	0.025106	0.606	3.92	12.394	0.142	78.338	4.3154	4.1534	3.707	3.5071
C1orf124	NM_001010984.1	20553	1	229555914	-0.627	0.647521	-2.6	0.030593	0.609	6.61	81.423	0.156	81.518	6.8825	6.9605	6.1039	6.4852
MGC39900	NM_194324.1	4200070	X	103103900	-0.627	0.647521	-2.59	0.031145	0.609	7.72	88.165	0.158	81.883	8.0745	7.9967	7.2112	7.6052
BRCA1	NM_007306.2	3120672	17	38516053	-0.627	0.647521	-2.56	0.032549	0.609	4.63	61.218	0.161	82.488	4.7628	5.1254	4.4281	4.2067
LARGE	NM_133642.2	4570242	22	31999582	-0.627	0.647521	-2.4	0.041837	0.618	4.17	34.706	0.184	86.225	4.331	4.6457	4.0945	3.6281
LOC116349	XM_931730.1	6380181	5	496455	-0.627	0.647521	-2.3	0.049333	0.62	4.17	33.927	0.202	88.501	4.285	4.6763	4.1127	3.5937
GLIPR2	NM_022343.2	830278	9	36153460	-0.627	0.647521	-2.04	0.074737	0.655	8.14	90.396	0.257	93.265	8.5616	8.3534	7.4078	8.2534
C12orf57	NM_138425.2	3130291	12	6923970	-0.626	0.64797	-2.81	0.022195	0.595	11.08	98.391	0.133	76.06	11.4494	11.3396	10.7846	10.7534
CTRL	NM_001907.1	6350131	16	67963582	-0.626	0.64797	-2.7	0.02622	0.609	6.15	78.131	0.144	78.76	6.4881	6.4329	5.9737	5.6952
	AW168583	130692	5	133460673	-0.626	0.64797	-2.64	0.028753	0.609	4.07	24.308	0.151	80.398	4.5347	4.2216	3.6752	3.8283
LOC654002	XM_944665.1	540181			-0.626	0.64797	-2.48	0.037025	0.61	4.67	62.353	0.171	84.25	4.8661	5.1052	4.5758	4.1436
LOC652523	XM_942002.1	4760136			-0.626	0.64797	-2.24	0.054148	0.625	3.85	7.967	0.211	89.454	3.8503	4.47	3.3782	3.6903
OR5AR1	NM_001004730.1	2350170	11	56188279	-0.626	0.64797	-2.13	0.064655	0.64	4.07	24.403	0.234	91.65	4.4208	4.3375	4.1453	3.3606
LOC653238	XM_932437.1	7570286	5	68909989	-0.625	0.64842	-2.72	0.025596	0.607	3.64	1.819	0.141	78.055	3.9503	3.9604	3.4594	3.2023
COG5	NM_006348.2	1430577	7	106630792	-0.625	0.64842	-2.45	0.039095	0.615	5.3	71.021	0.175	84.876	5.4159	5.8022	5.1579	4.8105
CCKBR	NM_176875.2	2070201	11	6249626	-0.625	0.64842	-2.41	0.041239	0.618	3.59	1.112	0.181	85.717	3.6273	4.1705	3.232	3.3152
TMEM33	NM_018126.1	6650382	4	41652447	-0.625	0.64842	-2.25	0.053279	0.624	6.34	79.596	0.208	89.168	6.3152	6.9963	6.0048	6.0566
LOC341230	XR_018617.1	1410491			-0.625	0.64842	-2.15	0.063012	0.636	4.24	40.016	0.23	91.213	4.3154	4.7818	4.2311	3.616
PTPRT	NM_007050.5	4780138	20	40703050	-0.625	0.64842	-2.13	0.064809	0.64	4.43	53.541	0.234	91.571	4.4824	5.0026	3.8215	4.413
LOC374443	NR_002814.1	4010681	12	9701485	-0.625	0.64842	-1.91	0.09135	0.667	4.35	49.103	0.292	95.135	4.4208	4.9133	4.4674	3.616
LOC646335	XM_929269.1	1470674	5	21516384	-0.625	0.64842	-1.7	0.126616	0.691	4.05	22.907	0.369	97.483	4.1293	4.595	3.1864	4.2888
IFT122	NM_052989.1	5390554	3	129200400	-0.625	0.64842	-1.64	0.137453	0.7	4.26	41.983	0.394	97.944	4.9372	4.2047	3.435	4.4576
ANG	NM_001097577.1	3930392	14	20232018	-0.624	0.648869	-2.81	0.021903	0.595	7.78	88.446	0.131	75.491	8.0996	8.0906	7.4374	7.5044
CLINT1	NM_014666.2	7040280	5	157214041	-0.624	0.648869	-2.79	0.022653	0.598	8.95	93.809	0.133	76.1	9.2038	9.3222	8.6106	8.6671
ACOT1	NM_001037161.1	4810471	14	73073794	-0.624	0.648869	-2.69	0.026694	0.609	4.44	53.965	0.143	78.601	4.7101	4.7896	3.9886	4.2634
STX6	NM_005819.4	4050161	1	180942629	-0.624	0.648869	-2.68	0.027254	0.609	7.46	86.68	0.145	78.929	7.8023	7.7507	7.0044	7.3009
FAM46B	NM_052943.2	4180324	1	27204252	-0.624	0.648869	-2.61	0.030368	0.609	6.12	77.928	0.153	80.847	6.2645	6.5974	5.7225	5.8913
BATF3	NM_018664.1	5900253	1	210926551	-0.624	0.648869	-2.44	0.039565	0.617	6.17	78.347	0.176	84.97	6.3871	6.585	5.6188	6.1045
SSX2	NM_003147.4	3940168	X	52743243	-0.624	0.648869	-2.38	0.043421	0.62	3.93	12.742	0.184	86.32	4.0059	4.47	3.4461	3.7817
LOC392395	NM_001013664.1	1710201			-0.624	0.648869	-2.35	0.045693	0.62	3.6	1.292	0.19	86.983	3.9696	3.862	3.5866	2.9972
GDF5OS	XR_041059.1	4640068			-0.624	0.648869	-2.25	0.053449	0.625	4.14	31.38	0.207	89.073	4.331	4.5693	4.1453	3.5071
	BX105693	4490768	15	37356007	-0.624	0.648869	-2.22	0.056231	0.625	4.29	44.348	0.214	89.763	4.9125	4.2888	4.1453	3.807
UBTD1	NM_024954.3	6770097	10	99320319	-0.624	0.648869	-2.21	0.056927	0.625	6.42	80.115	0.215	89.848	6.8931	6.5664	5.7887	6.4234
LOC651552	XM_940727.1	5290563			-0.624	0.648869	-1.98	0.081434	0.658	3.78	4.984	0.269	93.93	3.9306	4.2489	3.893	3.0377
	BX091613	4480424	10	17397705	-0.624	0.648869	-1.73	0.120485	0.69	4.63	61.307	0.353	97.161	4.5347	5.3568	3.914	4.7303
LST1	NM_205837.1	770471	6	31554646	-0.624	0.648869	-1.64	0.13783	0.701	3.5	0.544	0.394	97.946	3.6273	4.0074	2.5931	3.7931
MAN1A1	NM_005907.2	630014	6	119542644	-0.623	0.649319	-2.8	0.022496	0.596	4.92	66.761	0.132	75.764	5.184	5.2773	4.5758	4.6386
LARP6	NM_197958.1	5810687	15	71143944	-0.623	0.649319	-2.78	0.023256	0.599	7.67	87.927	0.134	76.346	7.979	7.9943	7.4423	7.2841
ZBTB34	NM_001099270.1	1400059	9	128687415	-0.623	0.649319	-2.65	0.028395	0.609	6.07	77.614	0.147	79.435	6.4094	6.3611	5.6023	5.9228
GFRA1	NM_005264.3	5220022	10	117813134	-0.623	0.649319	-2.64	0.028653	0.609	4.33	47.75	0.148	79.693	4.4956	4.7954	3.9509	4.0938
MIR889	NR_030595.1	4490519			-0.623	0.649319	-2.64	0.029034	0.609	4.2	36.671	0.149	79.977	4.3668	4.6524	3.7922	3.9802
LOC100134245	XM_001723619.1	6250228			-0.623	0.649319	-2.44	0.039827	0.617	4	18.16	0.175	84.809	4.5491	4.0646	3.5866	3.7817
RAD21	NM_006265.1	6040487	8	117932155	-0.623	0.649319	-2.41	0.041205	0.618	7.47	86.706	0.178	85.382	7.7666	7.7959	6.8873	7.4287
MTP18	NM_016498.3	6450184	22	29153339	-0.623	0.649319	-2.41	0.04173	0.618	5.63	74.102	0.18	85.605	6.1941	5.6828	5.4158	5.2144
AIM1L	NM_001039775.2	7000082	1	26648540	-0.623	0.649319	-2.28	0.050734	0.621	5.16	69.634	0.2	88.294	5.3551	5.5892	4.5455	5.1528
C17orf47	NM_001038704.1	5890367	17	56619202	-0.623	0.649319	-1.52	0.166152	0.72	4.34	48.453	0.459	98.768	4.1127	5.1989	3.5866	4.4797
LOC100130988	XM_001713888.1	3930471	7	50139884	-0.622	0.64977	-2.78	0.023253	0.599	3.92	12.644	0.133	76.122	4.2752	4.1963	3.5501	3.6767
CIB2	NM_006383.2	3420022	15	78397285	-0.622	0.64977	-2.7	0.026196	0.609	5.95	76.651	0.14	77.841	6.3718	6.1464	5.5722	5.7027
ARPC1B	NM_005720.2	130717	7	98821298	-0.622	0.64977	-2.7	0.02628	0.609	7.45	86.568	0.14	77.906	7.7363	7.781	7.0074	7.2665
HNRNPU	NM_031844.2	4250112	1	245013642	-0.622	0.64977	-2.65	0.028571	0.609	6.19	78.455	0.146	79.353	6.6335	6.3626	5.9655	5.7868
FLJ36032	XM_371311.5	3120044	1	149956991	-0.622	0.64977	-2.59	0.031337	0.609	4.04	22.324	0.153	80.928	4.2683	4.4391	3.9035	3.5603
EPHA5	NM_182472.1	3460411	4	65896485	-0.622	0.64977	-2.57	0.031957	0.609	4.12	29.953	0.155	81.358	4.2752	4.595	3.6949	3.9306
LOC100130227	XM_001713694.1	6420139			-0.622	0.64977	-2.56	0.032891	0.609	3.81	6.085	0.158	81.825	4.2752	3.9604	3.6302	3.3606
EGLN3	NM_022073.3	6130484	14	34393467	-0.622	0.64977	-2.46	0.038576	0.615	4.56	59.012	0.171	84.231	4.9125	4.8238	3.9985	4.4936
GABPAP	NR_002723.2	4590088			-0.622	0.64977	-2.44	0.039835	0.617	4.19	36.101	0.174	84.739	4.2752	4.7285	3.7507	4.0082
NAMPT	NM_005746.2	2230379	7	105893542	-0.622	0.64977	-2.41	0.041233	0.618	6.76	82.442	0.177	85.209	6.9155	7.2337	6.2352	6.6699
FLRT3	NM_198391.1	2350487	20	14309812	-0.622	0.64977	-2.4	0.042452	0.618	3.98	17.253	0.18	85.662	4.2924	4.2979	3.3958	3.9503
MESP2	NM_001039958.1	6980079	15	88121485	-0.622	0.64977	-1.97	0.083344	0.661	4.28	43.757	0.27	94.034	4.2132	4.9694	3.707	4.2311
LOC652355	XM_941785.2	5820709			-0.622	0.64977	-1.72	0.121635	0.69	4.46	54.837	0.353	97.146	4.1963	5.3376	4.0437	4.2471
C9orf31	XM_928521.1	6980086	9	123083120	-0.622	0.64977	-1.71	0.123877	0.69	3.78	5.001	0.358	97.25	4.4824	3.6949	3.0332	3.9011
TARP	NM_001003806.1	4280192	7	38305087	-0.622	0.64977	-1.42	0.1925	0.733	3.62	1.527	0.525	99.229	3.551	4.3141	2.6409	3.9802
SYPL1	NM_182715.1	3120519	7	105752706	-0.621	0.65022	-2.75	0.024403	0.603	5.86	75.923	0.134	76.486	6.2238	6.113	5.4707	5.625
OR10G7	NM_001004463.1	1780452	11	123908873	-0.621	0.65022	-2.7	0.0264	0.609	4.14	31.892	0.14	77.82	4.5792	4.3293	3.8734	3.7931
LOC100133979	XR_037040.1	380538			-0.621	0.65022	-2.57	0.032343	0.609	3.94	13.968	0.155	81.322	4.1557	4.3527	3.4594	3.807
IGSF3	NM_001542.2	2900674	1	117117393	-0.621	0.65022	-2.41	0.041522	0.618	8.18	90.587	0.177	85.095	8.617	8.3689	7.634	8.1108
LOC653053	XM_925853.2	2600438	1	50957	-0.621	0.65022	-2.2	0.057449	0.627	3.94	13.963	0.213	89.668	4.2596	4.2489	3.2776	3.9886
LOC730713	XM_001126896.1	2360301			-0.621	0.65022	-2.01	0.078287	0.656	3.86	8.677	0.258	93.314	4.2132	4.1293	3.9886	3.1112
TMEM182	NM_144632.2	6200097	2	102799989	-0.62	0.650671	-2.78	0.023145	0.599	4.84	65.645	0.13	75.328	5.0968	5.2096	4.526	4.5414
AKAP10	NM_007202.2	460020	17	19809334	-0.62	0.650671	-2.62	0.029661	0.609	5.34	71.54	0.147	79.583	5.5457	5.7645	4.905	5.1655
ARPC4	NM_005718.3	2230068	3	9809524	-0.62	0.650671	-2.49	0.036766	0.61	4.07	24.497	0.165	83.225	4.2433	4.511	3.5633	3.9503
BCAP29	NM_001008406.1	6250564	7	107050770	-0.62	0.650671	-2.35	0.04549	0.62	6.96	83.61	0.186	86.483	7.3486	7.1881	6.3661	6.9296
SALL3	NM_171999.2	2100561	18	74859066	-0.62	0.650671	-2.13	0.064593	0.64	4.28	43.73	0.227	91.042	4.2047	4.9753	3.9802	3.9596
	AW292093	2060309	2	45137192	-0.62	0.650671	-1.99	0.080373	0.658	4.39	51.409	0.26	93.441	5.1478	4.2564	4.0803	4.0847
TMEM151B	NM_001137560.1	1050767	6	44246818	-0.62	0.650671	-1.81	0.106321	0.679	4.43	53.804	0.317	96.185	4.6771	4.8129	3.5975	4.6524
LOC100132234	XM_001724063.1	2320438			-0.619	0.651122	-2.67	0.027431	0.609	3.9	11.198	0.141	78.089	4.1705	4.2564	3.729	3.4594
	CT000682	3870296	1	226347071	-0.619	0.651122	-2.59	0.031111	0.609	4.15	32.841	0.15	80.197	4.6136	4.3141	3.9509	3.7391
	AI368246	1400131	11	133409342	-0.619	0.651122	-2.59	0.03142	0.609	3.95	14.823	0.151	80.39	4.3668	4.1612	3.8009	3.4891
SLC7A5P1	NR_002593.1	3460523	16	29624434	-0.619	0.651122	-2.42	0.040667	0.618	4.35	48.788	0.173	84.536	4.9191	4.3993	4.0624	4.0177
TWSG1	NM_020648.3	940041	18	9391956	-0.619	0.651122	-2.41	0.041653	0.618	8.88	93.555	0.175	84.838	9.1034	9.2662	8.3125	8.8199
HOOK3	NM_032410.2	3440241	8	42993320	-0.619	0.651122	-2.34	0.046223	0.62	4.85	65.739	0.185	86.456	4.9583	5.3568	4.7556	4.3221
B3GALT1	NM_020981.2	3310736	2	168435268	-0.619	0.651122	-2.26	0.05225	0.621	3.91	11.914	0.199	88.224	4.069	4.3778	3.893	3.3152
FN1	NM_212474.1	6180528	2	216284087	-0.619	0.651122	-2.23	0.055009	0.625	4.26	42.119	0.205	88.804	4.4554	4.6836	3.6302	4.2714
HERC5	NM_016323.2	5720482	4	89427202	-0.618	0.651574	-2.78	0.023273	0.599	8.49	92.007	0.129	75.014	8.7995	8.8055	8.1337	8.2357
FBXO48	NM_001024680.1	2060609	2	68689942	-0.618	0.651574	-2.71	0.025671	0.607	4.49	56.474	0.136	76.825	4.6892	4.9133	4.1772	4.1884
NBPF10	NM_001039703.1	1510681			-0.618	0.651574	-2.68	0.027258	0.609	10.59	97.771	0.14	77.788	11.0234	10.7657	10.2306	10.3218
GCG	NM_002054.2	7560450	2	163000636	-0.618	0.651574	-2.52	0.034578	0.609	4.07	24.808	0.158	81.768	4.5618	4.1963	3.6514	3.8711
LOC643008	XM_942645.2	1010154			-0.617	0.652025	-2.74	0.024461	0.603	3.84	7.44	0.132	75.802	4.2275	4.0646	3.5501	3.5071
CCT6P1	NR_003110.2	5420053	7	64865437	-0.617	0.652025	-2.68	0.027163	0.609	9.61	95.818	0.139	77.504	9.7829	10.0462	9.2833	9.3114
IFITM4P	NR_001590.1	2480451	6	29826852	-0.617	0.652025	-2.65	0.028432	0.609	4.11	28.191	0.142	78.226	4.5558	4.2733	3.8452	3.7499
ATP2B4	NM_001001396.1	6100482	1	201979201	-0.617	0.652025	-2.49	0.036616	0.609	6.49	80.6	0.162	82.617	6.9608	6.636	6.0204	6.342
CHAC1	NM_024111.2	1500082	15	39035692	-0.617	0.652025	-2.04	0.075016	0.655	4.07	24.374	0.246	92.49	4.1025	4.6457	4.0803	3.4341
TMEM166	NM_032181.1	240523	2	75573323	-0.617	0.652025	-2.03	0.075564	0.655	3.79	5.27	0.247	92.558	4.4679	3.7199	3.2776	3.6767
MCM4	NM_005914.2	6020170	8	48889351	-0.616	0.652477	-2.76	0.023676	0.601	7.93	89.306	0.128	74.817	8.2709	8.2099	7.5794	7.6696
SLC26A9	NM_052934.2	2190711	1	204149083	-0.616	0.652477	-2.67	0.027519	0.609	3.76	4.414	0.139	77.54	4.0437	4.0924	3.3187	3.5846
LOC100130790	XM_001726820.1	4060368			-0.616	0.652477	-2.45	0.039112	0.615	3.76	4.546	0.167	83.441	3.8402	4.3046	3.3782	3.5344
	DB304625	110114	5	94648665	-0.616	0.652477	-1.86	0.098325	0.673	3.69	2.746	0.294	95.238	4.0518	3.9503	3.8833	2.887
LOC653056	XM_930618.1	2650358	7	54418	-0.616	0.652477	-1.59	0.149678	0.708	3.73	3.656	0.407	98.156	3.8292	4.2489	2.8092	4.037
	AA177072	6380195	3	25801197	-0.616	0.652477	-1.43	0.188978	0.732	4.42	52.842	0.502	99.1	4.6453	4.801	4.8546	3.3606
SLMO1	NM_006553.2	1110088	18	12422060	-0.615	0.65293	-2.75	0.024154	0.603	6.95	83.566	0.129	75.107	7.1936	7.3225	6.662	6.6233
NUAK1	NM_014840.2	1690156	12	106457601	-0.615	0.65293	-2.71	0.025931	0.609	6.71	82.061	0.133	76.236	7.1102	6.926	6.4539	6.3528
GPR153	NM_207370.1	1300110	1	6308939	-0.615	0.65293	-2.6	0.030629	0.609	4.73	63.562	0.145	78.969	5.1982	4.8731	4.4674	4.3749
LOC388153	XM_370887.4	3610079	15	80790027	-0.615	0.65293	-2.56	0.032671	0.609	4.15	32.781	0.15	80.187	4.376	4.5465	4.0164	3.6767
LY96	NM_015364.2	70167	8	75103777	-0.615	0.65293	-2.53	0.034421	0.609	3.83	7.256	0.155	81.192	4.0349	4.2489	3.35	3.7036
LOC100129543	XM_001715065.1	7570768			-0.615	0.65293	-2.5	0.035739	0.609	5.07	68.631	0.157	81.743	5.4134	5.3339	4.5455	4.9723
MGC26356	XR_041104.1	7150202			-0.615	0.65293	-2.39	0.042483	0.618	3.99	17.391	0.174	84.608	4.069	4.5177	3.8215	3.5344
	AI221824	3400670	20	46404775	-0.615	0.65293	-1.86	0.098273	0.673	4.22	38.593	0.292	95.147	4.6005	4.4544	4.4062	3.4194
NCKAP1	NM_205842.1	3930615	2	183822303	-0.614	0.653383	-2.61	0.030098	0.609	6.41	80.041	0.143	78.493	6.5537	6.876	6.111	6.0911
	BX101683	2570424	4	138483793	-0.614	0.653383	-2.56	0.032651	0.609	4.19	35.938	0.149	80	4.3082	4.6836	3.893	3.8711
LOC732393	XR_015873.1	5270465			-0.614	0.653383	-2.55	0.033314	0.609	4.01	19.909	0.151	80.409	4.2924	4.3527	3.5157	3.9011
CDX1	NM_001804.2	70184	5	149544138	-0.614	0.653383	-2.39	0.042869	0.62	4.08	25.835	0.173	84.58	4.1877	4.5886	3.5975	3.9503
LOC642464	XM_931105.1	3370241	12	7936460	-0.614	0.653383	-2.37	0.044203	0.62	3.98	16.951	0.176	85.061	4.5491	4.0266	3.5866	3.7605
RASSF4	NM_032023.3	10639	10	44810022	-0.614	0.653383	-2.2	0.058193	0.627	4.38	50.558	0.207	89.045	4.413	4.9585	3.854	4.2888
C11orf24	NM_022338.2	6110348	11	67785449	-0.614	0.653383	-2.06	0.071843	0.652	6.03	77.259	0.236	91.77	6.3787	6.2886	5.3153	6.1231
LOC643225	XM_931419.1	4570471	1	111019294	-0.614	0.653383	-1.77	0.113739	0.683	4.14	32.026	0.324	96.422	3.9596	4.9448	4.0717	3.6047
ACOT1	NM_001037161.1	4900438	14	73078125	-0.614	0.653383	-1.71	0.123539	0.69	3.42	0.267	0.345	96.958	3.7219	3.7301	3.6855	2.5389
LOC342531	XM_001715697.1	5690746	17	6501988	-0.613	0.653836	-2.53	0.034231	0.609	4.54	58.525	0.152	80.693	4.6892	5.0143	4.3575	4.1195
CHN1	NM_001822.3	6480477	2	175578058	-0.613	0.653836	-2.29	0.050406	0.621	3.69	2.769	0.189	86.93	4.0605	3.9409	3.0844	3.6903
CASZ1	NM_017766.3	2450047	1	10707544	-0.613	0.653836	-2.21	0.056569	0.625	6.33	79.528	0.202	88.535	6.5731	6.7042	5.6927	6.3584
LOC100129744	XM_001715569.1	20215			-0.613	0.653836	-2.19	0.058493	0.628	3.84	7.734	0.206	88.895	4.2433	4.0552	3.2023	3.8711
USP7	NM_003470.2	4640670	16	8987527	-0.613	0.653836	-2.19	0.05882	0.63	7.56	87.26	0.206	88.995	7.9874	7.7396	6.9243	7.5772
ABCC11	NM_145186.2	110138	16	48204805	-0.613	0.653836	-2.15	0.062719	0.636	3.71	3.159	0.215	89.932	4.3838	3.6514	3.435	3.3734
KLB	NM_175737.2	5550292	4	39126454	-0.613	0.653836	-2.09	0.068687	0.647	4.44	54.225	0.228	91.097	4.8549	4.6457	3.7588	4.515
LOC284232	XR_018826.1	4760500			-0.613	0.653836	-1.72	0.122537	0.69	4.2	36.599	0.342	96.89	4.1127	4.8943	3.4761	4.3046
FAM170A	NM_182761.2	1170021	5	118999322	-0.612	0.654289	-2.74	0.024457	0.603	4.09	26.328	0.127	74.32	4.3452	4.4391	3.8112	3.7499
LYSMD2	NM_153374.1	770538	15	49802846	-0.612	0.654289	-2.65	0.028371	0.609	8.86	93.475	0.137	77.066	9.0769	9.2494	8.4483	8.6547
GPR82	NM_080817.3	4920246	X	41471730	-0.612	0.654289	-2.48	0.037347	0.611	3.92	12.435	0.159	82.037	4.0253	4.4296	3.5157	3.7146
LOC402269	XM_935778.3	290753	7	62483332	-0.612	0.654289	-2.18	0.05925	0.631	4.35	48.976	0.207	89.007	4.3903	4.9266	3.8215	4.2714
LOC100132813	XM_001724347.1	5560470			-0.612	0.654289	-2.18	0.060007	0.633	3.88	9.767	0.208	89.149	3.9409	4.4296	3.3187	3.8283
USP22	XM_042698.7	5420148	17	20887235	-0.612	0.654289	-1.91	0.091102	0.667	3.95	14.611	0.273	94.23	4.0605	4.4544	3.2167	4.0739
RAMP1	NM_005855.2	7050064	2	238485302	-0.612	0.654289	-1.83	0.103581	0.678	3.61	1.34	0.299	95.471	3.9878	3.8384	2.7958	3.807
LOC643319	XM_927980.1	5310632	8	107779156	-0.612	0.654289	-1.73	0.12093	0.69	6.2	78.578	0.336	96.767	6.4742	6.5455	5.3359	6.4599
VN1R5	NM_173858.1	7650332	1	245486740	-0.611	0.654743	-2.72	0.025598	0.607	4.38	50.672	0.129	75.158	4.7628	4.6093	4.1127	4.037
PABPC3	NM_030979.2	1780377	13	24570566	-0.611	0.654743	-2.7	0.026291	0.609	3.77	4.656	0.131	75.664	4.0253	4.121	3.5501	3.3734
RASSF2	NM_170773.1	5390095	20	4708746	-0.611	0.654743	-2.68	0.02706	0.609	5.92	76.456	0.133	76.069	6.1575	6.3004	5.7042	5.5324
TCP11L1	NM_018393.2	1070753	11	33050620	-0.611	0.654743	-2.63	0.029303	0.609	5.57	73.594	0.138	77.392	5.7673	5.9845	5.1705	5.3601
NTF5	NM_006179.3	7050707	19	54256389	-0.611	0.654743	-2.6	0.030549	0.609	4.49	56.482	0.141	78.148	4.8836	4.7123	4.0521	4.3221
LOC100133740	XR_037083.1	1410154			-0.611	0.654743	-2.55	0.032993	0.609	4.49	56.262	0.147	79.556	4.6892	4.8943	4.3351	4.0266
	DB338622	4830452			-0.611	0.654743	-2.55	0.033014	0.609	4.3	45.352	0.148	79.649	4.4679	4.7475	3.8734	4.1195
RNASE4	NM_194430.1	5910382	14	20237478	-0.611	0.654743	-2.51	0.035555	0.609	5.26	70.587	0.153	80.881	5.693	5.4348	4.79	5.1162
LOC392197	XM_373243.3	2510095	8	12027722	-0.611	0.654743	-2.5	0.035783	0.609	4.13	30.895	0.154	81.042	4.3452	4.5332	4.0164	3.6398
CR1	NM_000573.3	1050025	1	205879575	-0.611	0.654743	-2.5	0.035909	0.609	4.16	33.025	0.154	81.114	4.5792	4.3446	3.6752	4.0266
ARSB	NM_000046.2	6900309	5	78217242	-0.611	0.654743	-2.5	0.036246	0.609	4.13	30.772	0.155	81.211	4.515	4.3604	4.026	3.6281
LOC652792	XM_942452.1	1940014			-0.611	0.654743	-2.38	0.043355	0.62	4.16	33.158	0.171	84.163	4.2433	4.6836	3.707	3.9985
SLC26A4	NM_000441.1	5900358	7	107145198	-0.611	0.654743	-2.14	0.063237	0.637	3.96	15.128	0.214	89.81	4.5019	4.0266	3.9322	3.3734
MIR891B	NR_030590.1	2230717			-0.611	0.654743	-2.11	0.066907	0.644	3.85	8.086	0.221	90.489	4.5347	3.7748	3.5157	3.5725
GJB3	NM_001005752.1	3420446	1	35024216	-0.611	0.654743	-2.03	0.075597	0.655	5.44	72.421	0.24	92.105	5.4744	6.0223	5.4502	4.8238
C12orf64	NM_173591.2	4830600	12	79257173	-0.611	0.654743	-1.99	0.080496	0.658	3.39	0.212	0.249	92.723	3.3152	4.0817	3.2889	2.887
LOC652679	XM_942270.1	2230373			-0.611	0.654743	-1.55	0.157939	0.715	3.98	16.788	0.417	98.317	4.5414	4.0266	4.2838	3.0628
PARP3	NM_001003935.1	290224	3	51952010	-0.611	0.654743	-1.5	0.171582	0.723	4.48	55.921	0.451	98.687	5.0228	4.5465	3.5157	4.8308
MED27	NM_004269.2	5220392	9	134814856	-0.61	0.655197	-2.75	0.024318	0.603	7.54	87.182	0.125	73.746	7.8154	7.8819	7.2569	7.2208
LOC728942	XM_001131211.1	1740241			-0.61	0.655197	-2.68	0.026932	0.609	4.3	45.407	0.132	75.777	4.6319	4.5833	3.893	4.1022
ESR1	NM_000125.2	3360095	6	152465685	-0.61	0.655197	-2.64	0.028881	0.609	3.71	3.25	0.137	76.983	4.1476	3.8922	3.4594	3.3606
KRT18P28	XR_017689.1	2260068	1	181194889	-0.61	0.655197	-2.62	0.029941	0.609	5.61	73.968	0.139	77.561	5.7673	6.0586	5.2679	5.3386
	AW009205	2000408			-0.61	0.655197	-2.59	0.030972	0.609	4.13	30.916	0.141	78.099	4.5558	4.3214	3.7181	3.94
VSIG8	NM_001013661.1	3420291	1	159824137	-0.61	0.655197	-2.52	0.034995	0.609	4.28	43.315	0.151	80.432	4.3978	4.7623	3.8833	4.0567
KIF16B	NM_024704.3	3610592	20	16359820	-0.61	0.655197	-2.36	0.044983	0.62	4.61	60.507	0.174	84.625	5.0327	4.7896	4.5455	4.0567
TGIF2LX	NM_138960.3	5560373	X	89064088	-0.61	0.655197	-2.22	0.056154	0.625	4.38	51.009	0.198	88.038	4.9421	4.4391	4.2985	3.862
STGC3	XR_017950.1	5810739			-0.61	0.655197	-2.01	0.077781	0.656	4.2	36.861	0.243	92.295	4.6576	4.3527	3.5019	4.2888
GIPC2	NM_017655.4	2680093	1	78375500	-0.61	0.655197	-2.01	0.078285	0.656	3.84	7.362	0.244	92.397	4.0782	4.2047	3.9509	3.1112
PKHD1L1	NM_177531.4	150300	8	110501934	-0.61	0.655197	-1.98	0.081698	0.659	4.26	42.157	0.251	92.88	4.1293	5.0026	3.971	3.94
LOC441711	XR_017229.2	3890068	15	21051749	-0.61	0.655197	-1.5	0.169757	0.722	3.31	0.102	0.443	98.598	3.7445	3.4866	3.6855	2.3265
CASP2	NM_032982.2	1440019	7	142699858	-0.609	0.655651	-2.71	0.025886	0.609	4.84	65.518	0.128	74.692	5.1396	5.1411	4.6136	4.4494
LOC644877	XR_017355.2	1110242	2	184181121	-0.609	0.655651	-2.68	0.027005	0.609	8.91	93.686	0.131	75.675	9.1974	9.2368	8.5029	8.7125
EFR3A	NM_015137.3	110161	8	133025013	-0.609	0.655651	-2.67	0.027622	0.609	8.93	93.746	0.132	75.965	9.1689	9.2962	8.5283	8.7194
PTP4A1	NM_003463.3	1030025	6	64293312	-0.609	0.655651	-2.61	0.030004	0.609	6.06	77.498	0.138	77.449	6.2186	6.514	5.7762	5.7385
LOC100131912	XM_001726043.1	4180414			-0.609	0.655651	-2.61	0.030427	0.609	3.58	1.04	0.14	77.746	4.0349	3.7301	3.2472	3.2992
RP5-1022P6.2	NM_019593.3	3360553	20	5527816	-0.609	0.655651	-2.6	0.030853	0.609	6.13	78.012	0.14	77.834	6.5382	6.3294	5.7067	5.9437
NUFIP2	NM_020772.1	5690113	17	24612861	-0.609	0.655651	-2.54	0.03367	0.609	7.44	86.536	0.147	79.507	7.9223	7.5668	7.0757	7.1956
	BQ049870	3170600	1	42659935	-0.609	0.655651	-2.52	0.034577	0.609	5.34	71.508	0.149	80.045	5.6762	5.6169	4.8435	5.2314
NDUFS1	NM_005006.5	5080687	2	206988239	-0.609	0.655651	-2.49	0.036608	0.609	5.15	69.539	0.154	81.108	5.2606	5.6533	4.9321	4.7633
HCG26	NR_002812.3	5360240	6	31439793	-0.609	0.655651	-2.42	0.040662	0.618	4.24	40.287	0.163	82.774	4.331	4.7554	4.0521	3.8173
CDO1	NM_001801.2	3780315	5	115169008	-0.609	0.655651	-2.4	0.042129	0.618	4.79	64.699	0.167	83.437	4.85	5.3292	4.5632	4.3978
KRT33A	NM_004138.2	6620341	17	39502387	-0.609	0.655651	-2.38	0.043496	0.62	3.84	7.628	0.169	83.879	4.3604	3.9306	3.6855	3.3885
C4orf32	NM_152400.1	4590167	4	113328846	-0.609	0.655651	-2.19	0.058873	0.63	6.2	78.533	0.202	88.56	6.3518	6.6497	5.582	6.2015
LOC100130492	XR_039385.1	4060156			-0.609	0.655651	-2.09	0.069104	0.647	4.32	46.317	0.223	90.731	4.2508	4.9883	3.893	4.1285
DSCR1L1	NM_005822.1	4250196	6	46296675	-0.609	0.655651	-1.38	0.202963	0.74	4.17	34.179	0.526	99.238	4.6831	4.2647	3.1167	4.6122
	AK092218	4890431	17	5315953	-0.608	0.656106	-2.69	0.026566	0.609	5.9	76.295	0.129	75.057	6.119	6.2981	5.5722	5.6287
CLK3	NM_003992.1	4640041	15	72709406	-0.608	0.656106	-2.67	0.027359	0.609	7.84	88.76	0.131	75.533	8.194	8.0906	7.4407	7.6285
LOC100128613	XM_001715288.1	3440255			-0.608	0.656106	-2.59	0.031352	0.609	4.08	26.01	0.141	78.053	4.3903	4.384	3.9417	3.616
NXF2B	NM_001099686.1	7400592	X	101719595	-0.608	0.656106	-2.57	0.032291	0.609	4.01	19.305	0.143	78.55	4.1638	4.4609	3.7922	3.616
GPR37	NM_005302.2	7210377	7	124386616	-0.608	0.656106	-2.53	0.034364	0.609	5.78	75.374	0.147	79.579	6.2258	5.9432	5.6056	5.3484
	AK056963	2450114	1	212589151	-0.608	0.656106	-2.5	0.036173	0.609	5.89	76.202	0.152	80.545	6.0228	6.3692	5.702	5.4746
CRISP1	NM_001131.2	1300397	6	49914110	-0.608	0.656106	-2.37	0.044154	0.62	3.57	0.932	0.17	84.021	4.1025	3.6379	3.1361	3.3885
LRRC17	NM_005824.1	4480035	7	102372456	-0.608	0.656106	-2.35	0.045394	0.62	4.25	41.051	0.173	84.481	4.7436	4.3604	4.1375	3.7499
LOC650373	XM_939458.2	430097			-0.608	0.656106	-2.22	0.05626	0.625	3.81	6.388	0.196	87.836	3.9969	4.2395	3.2023	3.8173
LOC388813	XM_373925.4	2320685	21	14910176	-0.608	0.656106	-1.97	0.083039	0.661	3.63	1.605	0.251	92.846	3.9306	3.9306	2.8853	3.7605
LOC728423	XR_015617.2	3610095	16	21803059	-0.608	0.656106	-1.88	0.095047	0.669	3.85	7.878	0.276	94.391	4.1025	4.1963	3.0649	4.0177
ARHGAP30	NM_001025598.1	1440634	1	161016900	-0.608	0.656106	-1.78	0.112118	0.681	4.21	37.276	0.312	95.975	4.5792	4.4391	4.4281	3.3734
SCD	NM_005063.4	2140128	10	102113442	-0.607	0.656561	-2.71	0.025654	0.607	11.85	99.109	0.126	74.155	12.1729	12.1261	11.4768	11.6076
SGK1	NM_005627.3	1410209	6	134491069	-0.607	0.656561	-2.7	0.026097	0.609	6.31	79.384	0.127	74.477	6.6076	6.6265	6.09	5.9294
LOC728955	XM_001128899.2	610754	10	50884658	-0.607	0.656561	-2.68	0.027241	0.609	4.36	49.154	0.13	75.226	4.6453	4.6716	4.153	3.9503
C3orf35	NM_178344.1	5360348	3	37402819	-0.607	0.656561	-2.64	0.028758	0.609	3.86	8.791	0.134	76.363	4.0518	4.2808	3.5019	3.616
PCSK5	NM_006200.2	1740343	9	77994461	-0.607	0.656561	-2.62	0.029682	0.609	6.46	80.413	0.136	76.74	6.8899	6.6461	6.0947	6.2279
CA2	NM_000067.1	2060674	8	86580533	-0.607	0.656561	-2.59	0.031021	0.609	9.74	96.174	0.139	77.688	9.9493	10.1473	9.319	9.5628
LOC652140	XM_941477.1	4920445			-0.607	0.656561	-2.56	0.032721	0.609	4.37	49.952	0.143	78.436	4.5098	4.8312	4.1293	3.9985
TM2D2	NM_078473.2	110711	8	38965720	-0.607	0.656561	-2.53	0.034532	0.609	5.88	76.13	0.147	79.499	6.0051	6.3714	5.5273	5.6357
PGCP	NM_016134.2	2640377	8	97916380	-0.607	0.656561	-2.42	0.041078	0.618	3.76	4.359	0.162	82.6	4.285	3.8384	3.3618	3.5484
C1orf85	NM_144580.1	2640086	1	156262580	-0.607	0.656561	-2.33	0.047177	0.62	8.14	90.4	0.175	84.896	8.3369	8.5586	7.583	8.0987
TAAR6	NM_175067.1	1010070	6	132891988	-0.607	0.656561	-1.97	0.083248	0.661	3.82	6.513	0.25	92.799	4.4888	3.7526	3.2776	3.7499
ITSN2	NM_147152.1	4590687	2	24297018	-0.607	0.656561	-1.96	0.084271	0.662	3.91	11.399	0.252	92.928	4.2992	4.121	4.0349	3.1716
LOC644754	XR_016963.2	7150435	5	126027059	-0.607	0.656561	-1.53	0.162972	0.719	3.81	6.195	0.421	98.365	4.285	3.9409	4.153	2.8597
TARBP2	NM_134323.1	7570446	12	52186326	-0.606	0.657016	-2.72	0.025529	0.607	7.21	85.205	0.124	73.621	7.5551	7.4791	6.8685	6.9543
LOC100127922	XR_038410.1	5130403	5	173921577	-0.606	0.657016	-2.71	0.025883	0.609	6.27	79.065	0.126	73.996	6.5097	6.636	5.9965	5.937
MOG	NM_002433.3	5340463	6	29639556	-0.606	0.657016	-2.41	0.041798	0.618	4.11	28.723	0.163	82.772	4.1705	4.6589	3.8359	3.7817
LOC100129979	XM_001718810.1	7000538	15	30564809	-0.606	0.657016	-2.4	0.04241	0.618	4.06	23.76	0.164	83.132	4.1293	4.595	3.6629	3.8485
USP4	NM_003363.2	6290435	3	49290103	-0.606	0.657016	-2.36	0.044896	0.62	5.76	75.188	0.169	83.926	5.955	6.1692	5.2138	5.699
	BE552335	7200630	12	127116843	-0.606	0.657016	-2.34	0.04662	0.62	4.55	58.572	0.174	84.603	4.6262	5.073	4.0803	4.4062
SYT14	NM_153262.1	4120259	1	208340192	-0.606	0.657016	-2.32	0.047803	0.62	4.17	34.568	0.175	84.883	4.4056	4.5465	3.5975	4.1436
C14orf80	NM_173608.1	7100008	14	105036505	-0.606	0.657016	-2.32	0.047989	0.62	7.73	88.207	0.176	85.012	7.9748	8.0942	7.1512	7.706
MIRLET7A2	NR_029477.1	4050546			-0.606	0.657016	-2.24	0.054314	0.625	4	18.776	0.19	87.025	3.9878	4.6233	3.6949	3.7036
MIR128-2	NR_029824.1	7200131			-0.606	0.657016	-2.11	0.067003	0.644	4.39	51.136	0.216	90.011	4.751	4.6305	4.4544	3.7146
RALYL	NM_173848.5	7400356	8	85686844	-0.606	0.657016	-2.06	0.072168	0.653	3.79	5.469	0.227	91.008	4.069	4.121	3.8833	3.0943
CHRNA9	NM_017581.2	610020	4	40051504	-0.606	0.657016	-1.93	0.088286	0.665	3.65	1.935	0.259	93.371	4.2351	3.6733	2.9935	3.7036
LOC645099	XM_930411.1	7560309	17	22429764	-0.606	0.657016	-1.23	0.252326	0.767	3.99	17.988	0.658	99.638	4.3527	4.2395	2.7958	4.5843
LPAR1	NM_057159.2	1050356	9	113636115	-0.605	0.657471	-2.47	0.0375	0.611	6.74	82.243	0.153	80.727	7.1122	6.9722	6.2352	6.6384
MFAP5	NM_003480.2	2570154	12	8798633	-0.605	0.657471	-2.47	0.03774	0.611	4.23	39.832	0.153	80.843	4.4208	4.6524	4.1127	3.7499
LDHC	NM_002301.2	1990161	11	18390535	-0.605	0.657471	-2.43	0.040502	0.618	3.96	14.836	0.159	82.052	4.413	4.1014	3.4761	3.8283
BAG3	NM_004281.3	1340075	10	121426542	-0.605	0.657471	-2.38	0.043589	0.62	9.76	96.208	0.165	83.284	10.167	9.9559	9.224	9.6893
TCIRG1	NM_006053.2	70672	11	67574603	-0.605	0.657471	-2.13	0.064375	0.64	6.23	78.766	0.209	89.306	6.8049	6.2602	6.1657	5.6897
C12orf56	NM_001099676.1	6040452	12	62947271	-0.605	0.657471	-2.02	0.077292	0.656	3.93	12.778	0.236	91.747	4.6386	3.8191	3.6752	3.5725
ATP5G2	NM_001002031.2	2320762	12	54070218	-0.605	0.657471	-1.93	0.088632	0.665	4.17	34.403	0.258	93.316	4.7943	4.1534	3.5501	4.1884
SNORD3C	NR_006881.1	580161	17	19093397	-0.604	0.657927	-2.71	0.025994	0.609	6.77	82.475	0.124	73.585	7.1061	7.0455	6.416	6.5272
DNAJC25-GNG10	NM_004125.2	540161	9	113433823	-0.604	0.657927	-2.67	0.027579	0.609	5.24	70.369	0.128	74.76	5.4662	5.6139	4.8696	5.0022
LOC643559	XM_926859.1	3800056	12	49884164	-0.604	0.657927	-2.58	0.031456	0.609	4.01	19.286	0.138	77.271	4.2508	4.3696	3.5633	3.8485
	AK091342	3290192	8	98033655	-0.604	0.657927	-2.52	0.034592	0.609	3.97	16.392	0.144	78.783	4.3903	4.1612	3.5271	3.8173
LOC651694	XM_944879.1	7570307			-0.604	0.657927	-2.41	0.041281	0.618	3.84	7.442	0.16	82.217	3.9011	4.3778	3.5501	3.5207
PPAPDC1A	NM_001030059.1	2070592	10	122216851	-0.604	0.657927	-2.36	0.045151	0.62	4.19	36.074	0.168	83.651	4.3387	4.6457	3.6752	4.1022
LOC339766	XM_939706.2	1300195			-0.604	0.657927	-1.83	0.102988	0.677	4.34	48.045	0.287	94.927	4.9835	4.2979	3.6752	4.3978
	AA398241	2450673	6	10840806	-0.604	0.657927	-1.57	0.153547	0.711	4.19	36.341	0.394	97.957	4.2433	4.7475	3.3039	4.4797
LOC100132703	XM_001714789.1	3450441	15	80943757	-0.603	0.658383	-2.71	0.025872	0.609	4.28	43.457	0.123	73.263	4.5618	4.595	3.9236	4.0266
KRTAP9-8	NM_031963.2	6020551	17	36648264	-0.603	0.658383	-2.69	0.026791	0.609	4.25	41.316	0.125	73.759	4.4824	4.6233	3.9802	3.9203
BNC1	NM_001717.2	1260037	15	81716601	-0.603	0.658383	-2.62	0.029892	0.609	3.71	3.028	0.133	76.105	3.9596	4.0552	3.5271	3.2818
C10orf113	NM_001010896.1	3450022	10	21454925	-0.603	0.658383	-2.5	0.035781	0.609	3.79	5.539	0.146	79.276	4.0782	4.1119	3.6855	3.2992
MRPS12	NM_021107.1	6980487	19	39421848	-0.603	0.658383	-2.34	0.046457	0.62	6.14	78.046	0.17	84.066	6.595	6.2829	5.6146	6.0566
GPR173	NM_018969.3	2320706	X	53123765	-0.603	0.658383	-1.77	0.113085	0.682	4.25	40.943	0.307	95.793	4.8836	4.2132	3.5377	4.3522
LOC402066	XM_377725.3	510519	2	2775993	-0.602	0.65884	-2.68	0.026984	0.609	4.14	31.373	0.125	73.691	4.4484	4.4296	3.914	3.7605
ZNF584	NM_173548.1	2480156	19	58929364	-0.602	0.65884	-2.57	0.032281	0.609	5.37	71.735	0.137	77.165	5.7645	5.5713	5.1905	4.9421
GPS1	NM_004127.4	1990520	17	77608574	-0.602	0.65884	-2.54	0.033851	0.609	10.46	97.578	0.141	78.139	10.7035	10.8243	9.997	10.326
SH3BGRL2	NM_031469.2	7200044	6	80413030	-0.602	0.65884	-2.53	0.034495	0.609	6.81	82.696	0.143	78.412	7.1512	7.0715	6.3328	6.6857
	CD237904	2060608	22	30363533	-0.602	0.65884	-2.45	0.039002	0.615	5.65	74.261	0.153	80.78	5.7707	6.1258	5.474	5.2182
C6orf199	NM_145025.3	1190017	6	110059982	-0.602	0.65884	-2.31	0.048386	0.62	4.46	54.775	0.173	84.476	4.5748	4.9376	3.9417	4.3668
CDH26	NM_177980.1	2650435	20	58005160	-0.602	0.65884	-2.12	0.0661	0.641	4.17	34.647	0.21	89.378	4.8388	4.1119	3.8359	3.9099
LOC100132713	XM_001714438.1	5220128	18	74482705	-0.602	0.65884	-2.04	0.074332	0.655	4.09	26.68	0.226	90.959	4.1293	4.6524	4.0882	3.4891
C21orf29	NM_144991.2	4070403	21	45918058	-0.602	0.65884	-1.65	0.135511	0.699	4.23	39.279	0.352	97.118	5.1162	3.9409	3.961	3.8922
CA2	NM_000067.1	870630	8	86580426	-0.601	0.659297	-2.69	0.026593	0.609	10.48	97.603	0.123	73.153	10.831	10.7345	10.2217	10.1422
	AA854001	5490653	X	134080818	-0.601	0.659297	-2.59	0.031256	0.609	3.85	8.118	0.134	76.456	4.1798	4.121	3.4083	3.6903
CCL26	NM_006072.4	4280301	7	75401257	-0.601	0.659297	-2.28	0.051287	0.621	4.53	57.763	0.178	85.243	5.0564	4.595	4.0437	4.4062
GUCY1A2	NM_000855.1	7000626	11	106558258	-0.601	0.659297	-2.11	0.066816	0.644	4.28	43.658	0.209	89.325	4.4754	4.6836	4.3293	3.6281
LOC642995	XM_931025.1	780360	X	301949	-0.601	0.659297	-2.04	0.074867	0.655	4.79	64.708	0.226	90.936	5.1162	5.0562	4.0882	4.882
SPANXN4	NM_001009613.2	2480082	X	141949608	-0.601	0.659297	-1.73	0.12049	0.69	3.53	0.671	0.318	96.259	3.9696	3.6949	3.7588	2.7042
	AV651250	6770458			-0.6	0.659754	-2.67	0.027632	0.609	4.33	47.547	0.125	73.653	4.5866	4.6763	3.961	4.1022
LOC100130301	XM_001721302.1	1770450	8	74316386	-0.6	0.659754	-2.64	0.028764	0.609	3.54	0.733	0.127	74.438	3.8503	3.8292	3.1361	3.344
XKRY	NM_004677.2	1980274	Y	19882210	-0.6	0.659754	-2.41	0.041716	0.618	4.12	29.629	0.156	81.525	4.3082	4.5332	4.026	3.616
ZMYM6	NM_007167.3	5810681	1	35452225	-0.6	0.659754	-2.35	0.04598	0.62	3.73	3.542	0.166	83.31	3.8922	4.1612	3.2023	3.6514
LFNG	NM_001040168.1	6060070	7	2535252	-0.6	0.659754	-2.16	0.061634	0.636	4.34	48.193	0.198	88.095	4.9835	4.2979	4.0437	4.037
BOLA3	NM_212552.2	7150687	2	74369435	-0.6	0.659754	-2.11	0.066533	0.642	3.8	5.626	0.208	89.126	3.7445	4.4473	3.5866	3.4058
C8orf54	NM_001038706.1	6350020	8	125065612	-0.6	0.659754	-2.1	0.067855	0.646	4.28	44.011	0.211	89.462	4.6205	4.5465	4.3505	3.616
PI3	NM_002638.2	1050168	20	43238123	-0.6	0.659754	-1.99	0.080073	0.657	3.97	15.862	0.236	91.738	4.121	4.414	3.2776	4.0567
UGT1A7	NM_019077.2	1340408	2	234255878	-0.599	0.660211	-2.7	0.026143	0.609	4.06	23.758	0.12	72.275	4.3387	4.3778	3.78	3.7391
BEGAIN	NM_020836.2	360537	14	100073457	-0.599	0.660211	-2.54	0.03366	0.609	5.31	71.146	0.137	77.237	5.7325	5.4816	5.1152	4.9018
MRGPRD	NM_198923.2	7050121	11	68747755	-0.599	0.660211	-2.49	0.036426	0.609	4.09	26.521	0.144	78.751	4.3978	4.3778	3.5975	3.9802
RGN	NM_152869.2	1710719	X	46825526	-0.599	0.660211	-2.42	0.040622	0.618	3.74	3.849	0.153	80.805	3.9211	4.1534	3.6302	3.2472
LOC643733	XM_001718847.1	650072			-0.599	0.660211	-2.42	0.041121	0.618	4.28	43.639	0.154	81.125	4.7569	4.3993	4.121	3.8376
KRT18P19	XR_016833.2	7050367	2	189884408	-0.599	0.660211	-2.41	0.041768	0.618	4.21	37.954	0.156	81.468	4.7043	4.3214	3.78	4.0472
LOC100130174	XM_001716215.1	6180372			-0.599	0.660211	-2.4	0.041931	0.618	4.09	26.879	0.156	81.453	4.5019	4.2808	3.5866	3.9985
	AL832093	4200020	16	83734044	-0.599	0.660211	-2.05	0.072976	0.653	4.14	31.158	0.22	90.377	4.6319	4.2395	3.5019	4.1711
LOC441868	XM_497647.3	150711			-0.599	0.660211	-2.01	0.078617	0.656	4.18	35.506	0.231	91.275	4.3838	4.5833	3.4891	4.2808
GFAP	NM_002055.2	3190167	17	40338756	-0.599	0.660211	-1.81	0.105996	0.679	4.45	54.587	0.286	94.878	5.1316	4.3696	4.4747	3.8283
JAKMIP2	NM_014790.3	2100253	5	147019198	-0.599	0.660211	-1.55	0.158043	0.715	3.97	16.332	0.396	97.978	3.9503	4.595	3.1167	4.2311
THEM5	NM_182578.1	990471	1	150085195	-0.598	0.660669	-2.57	0.03203	0.609	4.73	63.53	0.133	76.266	5.1396	4.9133	4.5203	4.3362
RBM12	NM_006047.4	2850438	20	34240511	-0.598	0.660669	-2.48	0.037038	0.61	7.6	87.517	0.144	78.836	7.7438	8.058	7.1881	7.418
LOC728989	NR_024442.1	2630392	1	146491227	-0.598	0.660669	-2.48	0.037259	0.611	3.92	12.335	0.145	79.041	4.285	4.1534	3.435	3.807
NEK2	NM_002497.2	1570309	1	211836836	-0.598	0.660669	-2.42	0.040639	0.618	6.46	80.386	0.152	80.665	6.8049	6.7082	5.9409	6.3763
LOC647541	XM_942887.1	3610292			-0.598	0.660669	-2.33	0.04693	0.62	4.2	36.48	0.165	83.248	4.4335	4.5541	3.6398	4.1527
SPRN	NM_001012508.3	3830142	10	135234853	-0.598	0.660669	-2.19	0.058516	0.628	4.02	19.911	0.19	87.021	4.2596	4.3696	3.3958	4.037
FAM49A	NM_030797.2	2510184	2	16734199	-0.598	0.660669	-2.19	0.059174	0.631	4.54	58.269	0.191	87.205	4.8836	4.7896	3.914	4.5632
LOC100133205	XM_001717665.1	6560092	6	26989515	-0.598	0.660669	-2.11	0.067168	0.645	4.17	34.041	0.207	89.075	4.2132	4.7209	3.6094	4.1285
LOC646407	XM_929333.1	2600168	19	13736110	-0.598	0.660669	-1.74	0.118967	0.689	4.83	65.465	0.311	95.948	5.5885	4.6716	4.2534	4.8105
LILRA5	NM_021250.2	2470162	19	59510171	-0.597	0.661127	-2.65	0.028182	0.609	4.47	55.572	0.123	73.27	4.85	4.6894	4.193	4.1527
ICMT	NM_012405.3	5550348	1	6281466	-0.597	0.661127	-2.64	0.028867	0.609	7.54	87.169	0.125	73.699	7.8034	7.8751	7.154	7.3313
AKAP4	NM_139289.1	7100575	X	49955705	-0.597	0.661127	-2.63	0.029301	0.609	3.91	11.359	0.126	74.229	4.3082	4.1014	3.6302	3.5846
	BU685158	2630736	11	105380539	-0.597	0.661127	-2.61	0.030177	0.609	4.19	36.281	0.128	74.737	4.528	4.4544	4.0067	3.7817
CACYBP	NM_014412.2	5890736	1	173235841	-0.597	0.661127	-2.55	0.033344	0.609	10.04	96.79	0.135	76.731	10.4711	10.1988	9.6578	9.8179
SKCG-1	XR_040140.2	5570112			-0.597	0.661127	-2.18	0.059454	0.632	4.03	21.416	0.191	87.148	4.6453	4.0171	3.6398	3.8283
C1orf112	NM_018186.2	940240	1	168088633	-0.597	0.661127	-1.97	0.082701	0.661	6.84	82.859	0.237	91.83	7.2306	7.0465	6.1314	6.9518
LOC391358	XM_940553.2	6650286			-0.597	0.661127	-1.39	0.201593	0.738	3.52	0.612	0.495	99.039	3.4047	4.2305	2.5931	3.8485
LOC399942	XM_934471.1	1740673	11	89655450	-0.596	0.661586	-2.66	0.027784	0.609	9.39	95.204	0.122	72.857	9.7394	9.6318	9.0417	9.1367
MRP63	NM_024026.4	7550452	13	20650964	-0.596	0.661586	-2.62	0.029874	0.609	7.25	85.423	0.127	74.261	7.6583	7.4422	6.9775	6.931
MGC40489	XR_016048.1	3420400	17	60181150	-0.596	0.661586	-2.62	0.029896	0.609	9.55	95.679	0.127	74.366	9.8746	9.8226	9.3613	9.1432
SC4MOL	NM_006745.3	4200037	4	166254525	-0.596	0.661586	-2.56	0.032591	0.609	7.12	84.608	0.133	76.054	7.4425	7.3962	6.6793	6.9679
	AW205453	7040424	3	71087150	-0.596	0.661586	-2.52	0.03486	0.609	4.69	62.751	0.138	77.352	4.8162	5.1571	4.4062	4.3749
DYRK1A	NM_130438.1	6220551	21	37808612	-0.596	0.661586	-2.43	0.040153	0.617	7.19	85.05	0.149	80.003	7.5303	7.4405	6.6793	7.1001
LOC441191	XR_001271.1	240463			-0.596	0.661586	-2.34	0.046028	0.62	5.96	76.723	0.162	82.615	6.3499	6.1618	5.4227	5.8971
RAB13	NM_002870.2	4390487	1	153954462	-0.596	0.661586	-2.31	0.048772	0.62	7.47	86.687	0.167	83.585	7.9515	7.576	6.9726	7.3635
SFI1	NM_001007467.1	1260113	22	30306288	-0.596	0.661586	-2.28	0.050928	0.621	3.87	9.108	0.172	84.324	4.3154	4.0171	3.8112	3.3297
TNP1	NM_003284.2	5490427	2	217432556	-0.596	0.661586	-2.27	0.05213	0.621	4.13	30.865	0.175	84.836	4.1798	4.6836	3.9802	3.6903
ADAM32	NM_145004.4	6450164	8	39233991	-0.596	0.661586	-2.09	0.068691	0.647	4.08	25.595	0.207	89.098	4.5748	4.1785	4.0882	3.4737
LOC646805	XM_001726979.1	6180523	16	20509417	-0.596	0.661586	-2.08	0.070412	0.649	3.93	12.97	0.212	89.551	4.0945	4.3604	3.9802	3.2818
C1QTNF1	NM_198594.1	5090079	17	74557316	-0.596	0.661586	-2	0.079884	0.657	5.6	73.911	0.229	91.196	5.6381	6.1654	4.9942	5.618
CASQ1	NM_001231.3	7150053	1	158437899	-0.596	0.661586	-1.55	0.159362	0.716	4.24	39.923	0.393	97.929	3.9696	5.0954	4.2458	3.6281
CACNB2	NM_201572.1	2850458	10	18868848	-0.595	0.662044	-2.67	0.027551	0.609	4.08	25.574	0.12	72.224	4.3221	4.4296	3.7694	3.7931
ACPP	NM_001099.2	2680725	3	133559926	-0.595	0.662044	-2.56	0.032479	0.609	4.34	48.466	0.132	75.84	4.6964	4.5886	3.914	4.1805
LOC100129652	XM_001715880.1	3990209	6	159108013	-0.595	0.662044	-2.49	0.036267	0.609	4.57	59.364	0.14	77.83	5.0228	4.7051	4.3575	4.1805
STMN1	NM_203401.1	3460707	1	26226891	-0.595	0.662044	-2.45	0.038914	0.615	9.34	95.077	0.146	79.128	9.5544	9.7165	8.854	9.2275
PACSIN2	NM_007229.1	7550333	22	41595886	-0.595	0.662044	-2.44	0.039289	0.616	8.59	92.452	0.147	79.454	8.8339	8.9492	8.0969	8.4958
LOC401913	XR_016508.2	6400347	19	40049680	-0.595	0.662044	-2.35	0.045672	0.62	3.98	16.936	0.16	82.232	4.2508	4.3046	3.9322	3.4341
TMEM191C	XM_928466.2	2750241	22	20151770	-0.595	0.662044	-2.22	0.056298	0.625	3.85	8.27	0.182	85.92	4.1798	4.121	3.8635	3.2472
TTYH1	NM_020659.2	50719	19	54947718	-0.595	0.662044	-1.89	0.094659	0.669	4.08	26.214	0.258	93.297	4.2683	4.4972	4.2311	3.344
METTL10	NM_212554.2	1980167	10	126447970	-0.595	0.662044	-1.69	0.128088	0.693	4.07	24.526	0.325	96.454	3.9116	4.8175	3.4461	4.0938
LOC441368	XM_926222.1	160653	8	92239887	-0.595	0.662044	-1.67	0.131838	0.695	3.9	10.906	0.333	96.684	3.8105	4.5833	3.1864	4.0177
MLC1	NM_015166.3	450358	22	50523796	-0.595	0.662044	-1.63	0.139994	0.703	3.84	7.768	0.351	97.097	4.5414	3.7409	3.9802	3.1112
BRD8	NM_139199.1	1010747	5	137506779	-0.594	0.662504	-2.66	0.028036	0.609	3.79	5.355	0.121	72.535	4.0518	4.121	3.5501	3.4341
LOC100128813	XM_001726057.1	770279			-0.594	0.662504	-2.59	0.031078	0.609	4.14	31.397	0.127	74.455	4.5491	4.3214	3.8009	3.8824
TMEM191A	XR_039958.1	1340477	22	19385688	-0.594	0.662504	-2.59	0.031258	0.609	5.8	75.512	0.128	74.703	6.0547	6.1434	5.6217	5.3881
FBXW12	NM_207102.1	6940014	3	48398321	-0.594	0.662504	-2.5	0.036172	0.609	4.26	42.298	0.139	77.517	4.6646	4.4544	3.8215	4.1098
LVRN	NM_173800.4	4250477	5	115362563	-0.594	0.662504	-2.33	0.047388	0.62	4.63	61.151	0.163	82.81	4.7628	5.0895	4.1293	4.5347
KIF1B	NM_015074.2	3450452	1	10278383	-0.594	0.662504	-2.16	0.061499	0.636	4.69	62.836	0.192	87.305	4.8329	5.1475	4.6892	4.1022
RMST	NR_024037.1	940364	12	97926951	-0.594	0.662504	-2.13	0.064607	0.64	4.19	35.824	0.197	87.921	4.3452	4.6233	3.5745	4.2067
SMAD7	NM_005904.2	4220767	18	46446794	-0.594	0.662504	-2.03	0.075972	0.655	4.81	65.118	0.22	90.362	5.4003	4.8175	4.2534	4.7763
HSD17B13	NM_178135.2	4070722	4	88444840	-0.594	0.662504	-1.97	0.082822	0.661	4.27	43.135	0.233	91.52	4.5932	4.5465	4.3915	3.5603
LOC730005	XM_001132040.2	1190154	22	29257893	-0.594	0.662504	-1.73	0.12046	0.69	4.59	59.969	0.308	95.85	4.6831	5.0833	4.7849	3.7931
VARS2	NM_020442.3	1500753	6	30894135	-0.593	0.662963	-2.62	0.029719	0.609	7.88	88.978	0.124	73.433	8.2397	8.1045	7.6509	7.5067
OR5M9	NM_001004743.1	2710132	11	56230555	-0.593	0.662963	-2.38	0.043461	0.62	4.1	27.355	0.154	80.998	4.1705	4.6161	3.729	3.8711
TGM1	NM_000359.2	6370615	14	24718457	-0.593	0.662963	-2.32	0.04795	0.62	5.09	68.919	0.163	82.785	5.4943	5.2833	4.5567	5.0351
	AW300868	4890576	17	73853652	-0.593	0.662963	-2.24	0.054566	0.625	4.95	67.261	0.176	85.052	5.2223	5.2773	4.9531	4.3604
TESSP1	XR_001529.1	2940041			-0.593	0.662963	-2.23	0.055509	0.625	4.07	24.276	0.178	85.317	4.2924	4.4296	4.0624	3.4737
NET1	NM_005863.3	6110279	10	5488103	-0.593	0.662963	-2.22	0.056096	0.625	5.4	72.025	0.179	85.448	5.4094	5.9801	5.2084	4.9961
LOC401127	XR_017898.1	6220537	4	39159590	-0.593	0.662963	-2.21	0.057277	0.626	6.34	79.594	0.182	85.982	6.9486	6.3276	6.0734	6.0159
LOC100130964	XM_001724267.1	4780035			-0.593	0.662963	-2.12	0.065526	0.641	3.81	6.39	0.198	88.021	4.1476	4.0732	3.8635	3.1716
TLR5	NM_003268.4	830440	1	223284002	-0.593	0.662963	-1.81	0.106181	0.679	4.59	60.185	0.277	94.453	5.3507	4.4296	4.1293	4.4657
L3MBTL3	NM_001007102.1	2190309	6	130446495	-0.593	0.662963	-1.71	0.124436	0.691	4.24	40.317	0.315	96.108	4.0157	5.0562	4.1036	3.7817
OR4P4	NM_001004124.1	290008	11	55163073	-0.593	0.662963	-1.69	0.127992	0.693	3.86	8.863	0.322	96.367	4.3903	3.9306	4.0717	3.0628
MIR548H4	NR_031680.1	2360240			-0.593	0.662963	-1.54	0.161675	0.718	3.81	6.038	0.394	97.948	4.5414	3.6629	3.9802	3.0377
SLC6A20	NM_022405.2	3170484	3	45772715	-0.593	0.662963	-1.11	0.297614	0.789	3.95	14.268	0.767	99.797	4.6386	3.8485	2.7459	4.5562
DMRTB1	NM_033067.1	1070341	1	53705454	-0.592	0.663423	-2.63	0.0292	0.609	4.11	28.195	0.121	72.692	4.3978	4.4062	3.893	3.7273
MGC40489	XR_016048.1	70554	17	60176197	-0.592	0.663423	-2.6	0.030561	0.609	5.66	74.377	0.124	73.63	5.8475	6.0602	5.3788	5.3452
PPIL4	NM_139126.2	3850386	6	149867494	-0.592	0.663423	-2.54	0.033872	0.609	4.02	20.247	0.132	75.832	4.3082	4.3214	3.8734	3.5725
ATP6V1E1	NM_001039367.1	6860543	22	18075124	-0.592	0.663423	-2.49	0.036611	0.609	10	96.731	0.138	77.43	10.2888	10.3054	9.526	9.8836
LOC642762	XM_926184.1	1510132	2	91392004	-0.592	0.663423	-2.42	0.04068	0.618	4.1	27.533	0.147	79.395	4.2351	4.5541	3.9417	3.6638
ZNF500	NM_021646.1	4280167	16	4801135	-0.592	0.663423	-2.4	0.041983	0.618	5.03	68.269	0.149	80.075	5.2176	5.4348	4.927	4.5414
PCDHGA9	NM_018921.2	7510243	5	140782854	-0.592	0.663423	-2.05	0.073268	0.653	4.03	20.825	0.212	89.56	4.4824	4.1612	4.0717	3.3885
TMPRSS11E2	NM_001099662.1	3170129	4	69337278	-0.592	0.663423	-2	0.079461	0.656	4.09	26.449	0.224	90.752	4.121	4.6457	4.0945	3.4891
MIR934	NR_030631.1	2340017			-0.592	0.663423	-1.97	0.083181	0.661	3.91	11.611	0.231	91.355	4.2508	4.1612	4.026	3.2023
HIST1H4E	NM_003545.3	2230619	6	26205148	-0.592	0.663423	-1.84	0.102309	0.677	5.33	71.358	0.269	93.915	5.6306	5.6198	5.5105	4.5562
PTTG1	NM_004219.2	1510291	5	159787441	-0.591	0.663883	-2.64	0.028643	0.609	11.06	98.37	0.119	72.118	11.3952	11.3218	10.7114	10.8233
LOC123855	XM_937998.2	730347			-0.591	0.663883	-2.59	0.03106	0.609	4.47	55.582	0.125	73.649	4.8053	4.7285	4.0717	4.2808
LOC644620	XM_001716736.1	4850402			-0.591	0.663883	-2.49	0.036689	0.609	4.25	41.013	0.138	77.299	4.4484	4.6377	3.8009	4.1022
LILRB4	NM_006847.2	2810259	19	59872826	-0.591	0.663883	-2.42	0.040532	0.618	4.05	23.053	0.145	79.096	4.1476	4.5465	3.6949	3.8173
LOXL3	NM_032603.2	7200706	2	74760688	-0.591	0.663883	-2.42	0.04065	0.618	4.93	66.996	0.145	79.088	5.3335	5.1254	4.82	4.4576
CECR4	NR_024483.1	7400431	22	17640612	-0.591	0.663883	-2.34	0.046402	0.62	4.14	31.625	0.157	81.737	4.4335	4.4391	3.5975	4.0938
LOC100132310	XR_037461.1	2360068			-0.591	0.663883	-2.34	0.046625	0.62	3.98	16.756	0.158	81.9	4.3082	4.2395	3.435	3.9306
MTPN	NM_145808.1	4210128	7	135262101	-0.591	0.663883	-2.33	0.046763	0.62	10.4	97.493	0.158	81.864	10.5598	10.8388	9.9011	10.3164
LOC100134368	NR_024453.1	4260470	16	442738	-0.591	0.663883	-2.25	0.053175	0.624	4.47	55.711	0.172	84.326	4.9583	4.5833	3.961	4.3978
CD14	NM_001040021.1	6370369	5	140011338	-0.591	0.663883	-2.06	0.072557	0.653	5.02	68.178	0.21	89.371	5.0709	5.5666	4.4473	5.0077
LOC100133985	NR_024444.1	2490546	2	70351456	-0.591	0.663883	-2.04	0.074726	0.655	3.74	3.995	0.214	89.757	4.2596	3.8191	3.1361	3.7605
ATP9A	NM_006045.1	2510156	20	50215478	-0.591	0.663883	-1.95	0.085683	0.664	3.78	4.95	0.235	91.662	4.2508	3.8922	3.0996	3.862
C7orf13	NM_032625.1	4900338	7	156124193	-0.591	0.663883	-1.75	0.116071	0.686	4.32	46.406	0.294	95.262	4.4609	4.7623	3.5271	4.515
KLHL8	NM_020803.3	2000019	4	88301892	-0.59	0.664343	-2.66	0.027849	0.609	7.38	86.217	0.117	71.131	7.6488	7.7017	7.0735	7.0974
SH3BP4	NM_014521.2	4890674	2	235628804	-0.59	0.664343	-2.6	0.030697	0.609	8.17	90.53	0.123	73.238	8.4692	8.4638	7.7729	7.9801
TROVE2	NM_001042369.1	4810390	1	191318407	-0.59	0.664343	-2.44	0.039513	0.617	8.75	93.123	0.142	78.374	9.1899	8.9083	8.3189	8.5994
FPR1	NM_002029.3	1030270	19	56941267	-0.59	0.664343	-2.42	0.040766	0.618	4.92	66.859	0.145	78.861	5.4252	5.0143	4.601	4.6595
LOC728416	XM_001715791.1	7150136			-0.59	0.664343	-2.4	0.042197	0.618	3.85	8.137	0.148	79.732	4.069	4.2216	3.35	3.7605
LOC650428	XM_939516.2	3370553			-0.59	0.664343	-2.31	0.048263	0.62	4.23	39.701	0.16	82.319	4.285	4.7691	4.026	3.8485
SHISA3	NM_001080505.1	5670286	4	42098261	-0.59	0.664343	-2.2	0.058185	0.627	4.55	58.841	0.18	85.67	5.1114	4.5833	4.4208	4.0938
LOC652276	NR_015441.1	870255	16	2680091	-0.59	0.664343	-2.19	0.058531	0.628	3.92	12.6	0.181	85.73	4.3452	4.0924	3.914	3.344
VILL	NM_015873.3	630689	3	38023135	-0.59	0.664343	-2.04	0.074635	0.655	4.11	28.401	0.212	89.617	4.2047	4.6019	4.1375	3.4891
MIR9-3	NR_029692.1	4670674			-0.59	0.664343	-1.65	0.137255	0.7	3.55	0.798	0.336	96.769	3.5885	4.1014	3.7694	2.7403
LOC255649	XM_172860.4	6130110	11	59529215	-0.59	0.664343	-1.38	0.204251	0.74	3.92	12.145	0.487	98.99	4.0864	4.3375	4.3575	2.887
VPS13D	NM_015378.2	4610408	1	12343271	-0.589	0.664804	-2.6	0.030726	0.609	3.92	12.32	0.122	72.872	4.2992	4.1293	3.5745	3.6767
RRM2B	NM_015713.3	7150224	8	103288170	-0.589	0.664804	-2.53	0.034526	0.609	6.33	79.461	0.131	75.486	6.4742	6.7643	5.9915	6.0694
MTMR2	NM_201281.1	4150739	11	95205823	-0.589	0.664804	-2.48	0.036969	0.61	6.3	79.319	0.136	76.884	6.771	6.4249	5.9815	6.0361
OR1D4	NM_003552.2	3830706	17	2966265	-0.589	0.664804	-2.44	0.039703	0.617	4.18	35.405	0.142	78.201	4.6576	4.2979	3.971	3.807
APOBEC3C	NM_014508.2	3120221	22	37744557	-0.589	0.664804	-2.37	0.044278	0.62	4.86	65.83	0.151	80.437	5.0521	5.2463	4.3505	4.7702
MEF2A	NM_005587.1	6400132	15	98070456	-0.589	0.664804	-2.36	0.044848	0.62	4.76	64.326	0.152	80.705	5.2872	4.8312	4.413	4.5275
UGDH	NM_003359.2	4780050	4	39500448	-0.589	0.664804	-2.22	0.05629	0.625	8.14	90.394	0.175	84.857	8.2655	8.6109	7.6058	8.0935
SLC9A2	NM_003048.3	3710563	2	102693971	-0.589	0.664804	-1.94	0.087696	0.665	4.7	62.929	0.236	91.808	4.6576	5.3243	4.1375	4.6664
LOC646038	XM_928999.1	3390278	17	60277349	-0.588	0.665265	-2.66	0.027961	0.609	4.92	66.721	0.116	70.824	5.2106	5.2096	4.6377	4.6056
GPSM3	NM_022107.1	6420386	6	32266808	-0.588	0.665265	-2.65	0.028405	0.609	4.79	64.729	0.116	70.975	5.0564	5.1052	4.5203	4.4657
RRP7A	NM_015703.3	3130598	22	42908623	-0.588	0.665265	-2.64	0.028803	0.609	8.21	90.752	0.117	71.343	8.4616	8.5547	7.8926	7.9475
KCTD6	NM_153331.2	5290193	3	58463014	-0.588	0.665265	-2.56	0.032497	0.609	8.37	91.465	0.126	74.013	8.7385	8.5813	7.9748	8.1682
C17orf41	XM_945964.1	3120338			-0.588	0.665265	-2.53	0.034051	0.609	4.15	32.481	0.129	74.875	4.4412	4.4473	3.9985	3.7146
LOC647082	XM_930093.1	3990286	2	61895607	-0.588	0.665265	-2.5	0.03577	0.609	3.72	3.275	0.132	76.016	3.8734	4.1464	3.3369	3.5071
STON1	NM_006873.2	4230730	2	48679254	-0.588	0.665265	-2.49	0.03636	0.609	3.85	8.3	0.134	76.295	3.9969	4.2979	3.6302	3.4891
PTK2B	NM_173176.1	2810632	8	27316269	-0.588	0.665265	-2.38	0.043802	0.62	5.27	70.765	0.149	80.064	5.4528	5.6828	4.7849	5.1747
C3orf35	NM_178343.1	6960100	3	37433224	-0.588	0.665265	-2.32	0.04817	0.62	3.63	1.668	0.158	81.885	3.7219	4.1293	3.4891	3.1864
LOC643927	XM_927188.1	4120368	9	13513	-0.588	0.665265	-2.3	0.049326	0.62	4.27	43.004	0.161	82.387	4.3221	4.8081	4.0717	3.8824
RNPEP	NM_020216.3	5570601	1	200241710	-0.588	0.665265	-2.08	0.069877	0.649	7.54	87.146	0.201	88.452	8.0471	7.6132	6.956	7.5277
LOC732111	XM_001134275.1	2760333			-0.588	0.665265	-1.81	0.105891	0.679	4.6	60.312	0.27	94.048	4.7702	5.0143	4.7709	3.8376
ADAM32	XM_940500.1	7550491			-0.588	0.665265	-1.52	0.16673	0.72	4.16	33.641	0.396	97.989	5.0228	3.8922	3.5501	4.1884
RBM12	NM_006047.4	4880021	20	34241601	-0.587	0.665726	-2.58	0.03148	0.609	6.18	78.404	0.123	73.016	6.4654	6.4792	5.7785	5.9915
ARHGAP20	NM_020809.2	6480593	11	110448264	-0.587	0.665726	-2.57	0.032374	0.609	4.24	40.346	0.125	73.644	4.6453	4.4214	3.9035	3.9886
PRRG1	NM_000950.1	7150673	X	37201128	-0.587	0.665726	-2.56	0.032766	0.609	6.28	79.137	0.125	73.837	6.5074	6.636	5.8782	6.0911
SIGLEC10	NM_033130.2	4480497	19	56605324	-0.587	0.665726	-2.55	0.033151	0.609	3.86	8.433	0.126	73.998	4.1375	4.1612	3.435	3.6903
HIF1A	NM_001530.2	4900010	14	61277556	-0.587	0.665726	-2.5	0.035845	0.609	5.03	68.262	0.132	75.878	5.3462	5.3	4.8943	4.5772
SLC15A4	NM_145648.1	160279	12	127843966	-0.587	0.665726	-2.5	0.036083	0.609	8.07	89.992	0.132	75.94	8.5164	8.2076	7.8226	7.7275
MAPKBP1	NM_014994.1	1300747	15	39907042	-0.587	0.665726	-2.46	0.038105	0.612	5	67.936	0.136	76.973	5.3412	5.2513	4.884	4.5347
CCT8L1	NM_001029866.2	360546	7	151774846	-0.587	0.665726	-2.37	0.044402	0.62	3.83	7.243	0.15	80.193	4.285	3.9703	3.707	3.3734
SNORD26	NR_002564.1	6590408	11	62379414	-0.587	0.665726	-2.36	0.044768	0.62	4.11	28.365	0.151	80.356	4.4335	4.3696	4.0437	3.5846
LOC100131973	XM_001715892.1	4200609			-0.587	0.665726	-2.22	0.05606	0.625	4.19	36.305	0.172	84.43	4.7763	4.1963	3.9509	3.8485
LOC653899	XM_936439.1	2970328			-0.587	0.665726	-2.08	0.07037	0.649	3.92	11.994	0.2	88.317	4.0945	4.3214	3.961	3.2818
C14orf148	NM_138791.1	5220546	14	77873891	-0.587	0.665726	-2.07	0.070769	0.65	3.97	15.903	0.202	88.514	4.4679	4.0552	3.3782	3.9703
ACVR1B	NM_004302.3	1410132	12	50665370	-0.587	0.665726	-1.98	0.082144	0.659	4.3	45.106	0.223	90.678	4.1963	4.9883	4.0803	3.9306
DPT	NM_001937.3	2100228	1	168664877	-0.587	0.665726	-1.97	0.083315	0.661	3.87	9.189	0.226	90.896	4.1127	4.2132	3.9802	3.1716
LOC649159	NM_001040069.1	830358	16	33868648	-0.587	0.665726	-1.68	0.130275	0.694	3.9	10.792	0.318	96.242	4.7303	3.6514	3.7181	3.4891
TGOLN2	NM_006464.2	5700672	2	85545437	-0.586	0.666187	-2.61	0.030452	0.609	7.93	89.28	0.119	72.067	8.2583	8.1842	7.5592	7.711
KDELR3	NM_016657.1	540129	22	37207271	-0.586	0.666187	-2.5	0.035738	0.609	8.07	90.024	0.13	75.37	8.4388	8.2896	7.643	7.9143
RGAG1	NM_020769.1	620121	X	109585958	-0.586	0.666187	-2.4	0.041884	0.618	4.02	19.964	0.144	78.677	4.1638	4.4544	3.8734	3.5725
LOC653254	XM_926626.1	3780376	15	87546543	-0.586	0.666187	-2.17	0.060257	0.634	4.14	31.89	0.18	85.645	4.5208	4.3527	4.153	3.5484
TCEA1	NM_006756.2	4210189	8	55068783	-0.586	0.666187	-2.02	0.077343	0.656	5.11	69.128	0.213	89.708	5.4094	5.4023	4.4346	5.2042
NPPC	NM_024409.1	5550450	2	232790210	-0.586	0.666187	-1.73	0.120648	0.69	4.06	24.147	0.297	95.382	4.6205	4.0924	3.3187	4.2216
E2F6	NR_003095.1	3190563	2	11584693	-0.586	0.666187	-0.978	0.355738	0.813	3.62	1.463	0.971	99.917	4.4484	3.3714	4.3214	2.3265
[truncated: 45,232 more rows]

## Sheet: CTL vs KD-72hr
SYMBOL	ACCESSION	ProbeID	Chr	Start	logFC	Fold change (siSUNO1-a/siNC)	t	P.Value	adj.P.Val	rowMean	rowMeanPctl	rowVar	rowVarPctl	CTL-2kd_1day_1	CTL-2kd_1day_2	si7b-2kd_1day_1	si7b-2kd_1day_2
CTGF	NM_001901.1	5690687	6	132311203	-3.513	0.0875955	-12.7	0	0.000126	7.04	84.197	4.158	99.998	8.9223	8.6754	5.5132	5.0584
THBS1	NM_003246.2	5810685	15	37676117	-2.838	0.139855	-9.36	0	0.001605	5.91	76.331	2.804	99.989	7.7468	6.9014	4.4962	4.4765
	AJ420516	6580674	6	11246423	-2.725	0.151249	-8.7	0	0.001755	5.53	73.164	2.623	99.985	6.8286	6.9608	3.7026	4.6375
KIAA0101	NM_014736.4	5090754	15	64669038	-2.606	0.164254	-6.73	8e-06	0.006141	7.86	88.937	2.665	99.987	8.9168	9.4012	5.8157	7.2905
DNAJB6	NM_058246.3	5860315	7	156902552	-2.574	0.167938	-9.25	0	0.001605	6.73	82.175	2.256	99.979	8.2305	7.7974	5.2827	5.5976
NT5E	NM_002526.1	5960398	6	86261733	-2.484	0.178748	-7.83	1e-06	0.002563	6.53	80.826	2.219	99.977	7.2915	8.2534	5.1811	5.3958
RNU4-2	NR_003137.2	3850189			-2.48	0.179244	-6.54	1.1e-05	0.006816	7.03	84.138	2.423	99.981	8.0378	8.5074	6.503	5.0823
KRT81	NM_002281.2	430446	12	50966078	-2.467	0.180867	-9.05	0	0.001605	5.39	71.813	2.061	99.96	6.8432	6.4089	4.2067	4.1119
KRT80	NM_182507.2	4830520	12	52563537	-2.452	0.182757	-8.55	0	0.001755	7.53	87.121	2.075	99.964	8.8147	8.7014	6.6282	5.9839
SYPL1	NM_182715.1	1190452	7	105731442	-2.397	0.189859	-8.63	0	0.001755	8.22	90.879	1.961	99.951	9.201	9.6449	6.8829	7.1699
PDLIM3	NM_014476.1	6330008	4	186660357	-2.392	0.190518	-8.31	1e-06	0.002006	6.45	80.274	1.982	99.953	7.4573	7.8419	4.9828	5.5324
	AI218425	1010039	10	43950072	-2.377	0.192509	-2.63	0.019358	0.264407	3.55	0.792	5.557	100	4.6809	4.7951	4.7078	0.0144
LOC100132802	XM_001722593.1	430131	17	119723	-2.366	0.193983	-7.13	4e-06	0.004601	5.73	74.932	2.074	99.962	7.4366	6.3862	4.7324	4.3575
UBE2N	NM_003348.3	270156	12	93802263	-2.344	0.196963	-8.99	0	0.001605	8.3	91.243	1.834	99.941	9.4191	9.5201	7.1343	7.1164
PREI3	NM_199482.1	240288	2	198125136	-2.326	0.199436	-8.33	1e-06	0.002006	7.67	87.927	1.853	99.945	8.6193	9.0394	6.3259	6.6814
MOBKL3	NM_199482.2	6940307	2	198125341	-2.293	0.204051	-7.62	2e-06	0.002932	7.45	86.695	1.866	99.947	8.5467	8.6467	5.8955	6.7114
ZAK	NM_133646.2	4670059	2	173799586	-2.292	0.204192	-7.8	1e-06	0.002563	7.43	86.583	1.842	99.943	8.2695	8.8884	6.0849	6.4897
CD9	NM_001769.2	6250487	12	6214685	-2.288	0.204759	-6.7	8e-06	0.006266	7.36	86.181	1.985	99.956	8.5099	8.5069	5.6204	6.8198
MYADM	NM_138373.3	2970594	19	54379297	-2.26	0.208772	-8.57	0	0.001755	6.5	80.578	1.712	99.926	7.6548	7.5975	5.2501	5.4819
RBMS1	NM_002897.3	4150639	2	160843364	-2.236	0.212274	-7.43	2e-06	0.003481	6.89	83.231	1.778	99.93	8.1946	7.8194	5.4063	6.1363
AADACL1	NM_020792.3	7650020	3	173831679	-2.228	0.213454	-8.11	1e-06	0.002128	6.29	79.139	1.692	99.924	7.285	7.5237	5.3831	4.9705
COMMD2	NM_016094.2	6560020	3	150941394	-2.2	0.217638	-8.33	1e-06	0.002006	6.65	81.631	1.624	99.911	7.6285	7.8632	5.4985	5.5932
MOBKL3	NM_001100819.1	6510669	2	198124637	-2.198	0.21794	-8.1	1e-06	0.002128	6.92	83.388	1.639	99.915	7.9413	8.0895	5.623	6.0125
COQ2	NM_015697.6	5720128	4	84404171	-2.186	0.21976	-7.74	1e-06	0.002622	7.52	87.045	1.652	99.917	8.3422	8.8853	6.3056	6.5498
RAC2	NM_002872.3	110382	22	37621465	-2.169	0.222365	-8.15	1e-06	0.002128	8.54	92.278	1.584	99.905	9.4837	9.7608	7.3842	7.5223
RDX	NM_002906.3	6110291	11	110100702	-2.133	0.227983	-7.6	2e-06	0.002932	7.52	87.076	1.571	99.9	8.3541	8.8266	6.2949	6.6196
GADD45B	NM_015675.2	4920110	19	2429063	-2.101	0.233097	-7.31	3e-06	0.003856	6.61	81.353	1.545	99.892	7.9666	7.3492	5.6786	5.4351
LEPROTL1	NM_015344.1	6370164	8	30084876	-2.094	0.23423	-8.03	1e-06	0.002151	8.02	89.799	1.464	99.879	9.0723	9.0548	6.9185	7.0204
UHRF1	NM_001048201.1	2940110	19	4912360	-2.075	0.237336	-7	5e-06	0.004777	8.96	93.955	1.534	99.89	9.9311	10.0717	7.5475	8.3055
POLR3G	NM_006467.2	3400037	5	89809735	-2.068	0.23849	-7.94	1e-06	0.002358	8.35	91.487	1.427	99.869	9.3844	9.3802	7.2737	7.3545
CCT6A	NM_001762.3	2600630	7	56089640	-2.049	0.241652	-7.49	2e-06	0.003373	8.05	89.994	1.435	99.871	9.1845	8.9694	6.8236	7.2323
TJP1	NM_175610.2	1010386	15	29993179	-2.014	0.247586	-7.74	1e-06	0.002622	6.64	81.563	1.353	99.852	7.6184	7.6698	5.6087	5.6511
SMPDL3A	NM_006714.2	4230669	6	123171997	-1.988	0.252088	-5.87	3.4e-05	0.010288	5.78	75.334	1.547	99.894	6.2787	7.2627	4.4609	5.1052
WASL	NM_003941.2	6380138	7	123322280	-1.968	0.255607	-6.77	7e-06	0.006112	7.65	87.847	1.374	99.854	8.3451	8.9276	6.4695	6.8667
TRR1	NR_000038.1	2600458	17	7964968	-1.968	0.255607	-2.77	0.014422	0.233999	2.79	0.002	3.421	99.992	3.8326	3.7044	0.0144	3.5866
MGC4677	NM_052871.3	6350189	2	87602016	-1.953	0.258279	-7.37	3e-06	0.003639	9.44	95.418	1.284	99.831	10.5473	10.2858	8.5089	8.4191
NFIX	NM_002501.2	5720129	19	13070426	-1.943	0.260075	-6.34	1.5e-05	0.007501	6.91	83.344	1.387	99.858	8.2473	7.5112	5.696	6.1764
GPRC5A	NM_003979.3	5690270	12	12957521	-1.941	0.260436	-7.03	5e-06	0.004777	6.1	77.824	1.297	99.839	6.9936	7.153	5.3713	4.8943
CKAP2L	NM_152515.2	6380324	2	113212054	-1.933	0.261884	-5.91	3.1e-05	0.010254	6.58	81.133	1.438	99.873	7.412	7.6795	5.0922	6.1332
LOC100008589	NR_003287.1	6290142			-1.925	0.26334	-4.92	0.000198	0.024949	10.56	97.787	1.654	99.92	11.5989	11.4479	10.3863	8.8095
RN7SK	NR_001445.1	990176	6	52968633	-1.92	0.264255	-5.17	0.000124	0.019922	7.21	85.152	1.574	99.903	8.27	8.0678	6.9607	5.5366
HOXA10	NM_018951.3	510097	7	27210506	-1.918	0.264621	-6.46	1.2e-05	0.007092	8.21	90.813	1.327	99.85	9.1194	9.2223	7.6374	6.8681
KRTAP3-1	NM_031958.1	2350484	17	39165184	-1.914	0.265356	-5.66	5e-05	0.012212	5.43	72.164	1.45	99.877	6.9698	5.7981	4.4872	4.4533
CENPQ	NM_018132.3	2350630	6	49460397	-1.912	0.265724	-6.91	6e-06	0.005111	5.75	75.158	1.263	99.829	6.4958	6.9247	4.6567	4.939
PPPDE1	NM_016076.3	3870255	1	242938451	-1.911	0.265908	-6.69	8e-06	0.006266	7.97	89.553	1.285	99.833	8.9968	8.854	6.7034	7.326
TAGLN	NM_003186.3	650678	11	116580580	-1.907	0.266646	-7	5e-06	0.004777	6.74	82.304	1.245	99.824	7.8916	7.5037	5.8943	5.6869
MALT1	NM_006785.2	1770386	18	54568095	-1.897	0.268501	-7.1	4e-06	0.004605	7.06	84.311	1.218	99.809	8.1753	7.846	6.1039	6.1233
EMP1	NM_001423.1	3940435	12	13260606	-1.889	0.269994	-6.26	1.7e-05	0.00757	6.29	79.151	1.303	99.845	7.0679	7.4048	5.7251	4.9705
IRF2BP2	NM_182972.2	3290224	1	234740591	-1.876	0.272438	-6.92	6e-06	0.005094	6.75	82.317	1.202	99.803	7.6081	7.7599	5.6152	6.0001
APOBEC3B	NM_004900.3	3170068	22	37715452	-1.871	0.273384	-7.1	4e-06	0.004605	6.4	79.878	1.176	99.786	7.2732	7.4011	5.3713	5.5605
	AB074172	4010100	5	55269084	-1.871	0.273384	-6.97	5e-06	0.004884	6.31	79.289	1.189	99.793	7.1309	7.3685	5.2439	5.513
ERGIC2	NM_016570.2	6660674	12	29493832	-1.867	0.274143	-6.81	7e-06	0.00593	6.5	80.642	1.199	99.801	7.3492	7.5253	5.789	5.3515
CCT6A	NM_001009186.1	5820392	7	56098879	-1.866	0.274333	-7.14	4e-06	0.004601	8.89	93.71	1.163	99.769	9.8538	9.797	7.8973	8.0226
LOC649553	XR_038252.1	1980239	7	64168295	-1.865	0.274523	-6.29	1.6e-05	0.007501	10.19	97.133	1.258	99.826	11.1884	11.0527	8.8754	9.6365
PBK	NM_018492.2	3420554	8	27723197	-1.865	0.274523	-5.11	0.000139	0.020961	7.93	89.357	1.481	99.884	8.3229	9.4042	6.5628	7.4347
CYR61	NM_001554.3	3930605	1	85821467	-1.858	0.275858	-7.02	5e-06	0.004777	8.27	91.082	1.163	99.765	9.3299	9.071	7.376	7.3089
ALPK2	NM_052947.3	5270519	18	56148547	-1.858	0.275858	-7.01	5e-06	0.004777	5.71	74.733	1.163	99.767	6.5131	6.7624	4.8361	4.7237
CTGF	NM_001901.2	2640292	6	132311214	-1.849	0.277585	-6.62	9e-06	0.006674	6.4	79.901	1.19	99.795	7.2832	7.3743	5.7531	5.2071
SIX4	NM_017420.3	20653	14	61176419	-1.846	0.278163	-6.23	1.8e-05	0.007776	7.59	87.508	1.234	99.818	8.1807	8.845	6.475	6.8594
TMEM19	NM_018279.3	110196	12	70383455	-1.844	0.278548	-6.48	1.2e-05	0.007092	5.66	74.324	1.199	99.799	6.3057	6.8661	4.6025	4.8818
ST6GALNAC1	NM_018414.2	3840470	17	72132881	-1.843	0.278742	-3.44	0.003729	0.123013	3.3	0.072	2.203	99.975	4.0717	4.3772	1.1235	3.639
UGDH	NM_003359.2	4780050	4	39500448	-1.837	0.279903	-6.32	1.5e-05	0.007501	7.77	88.482	1.207	99.807	8.5029	8.8676	6.5485	7.1482
C11orf82	NM_145018.2	2570019	11	82322969	-1.834	0.280486	-5.1	0.000141	0.021005	7.35	86.035	1.424	99.867	7.9861	8.541	5.8157	7.0433
ANTXR2	NM_058172.3	10685	4	81045984	-1.828	0.281655	-7.01	5e-06	0.004777	6.71	82.084	1.115	99.742	7.6301	7.6266	5.7474	5.8542
LOC441956	NM_001013729.1	2640259	21	13973740	-1.825	0.282241	-4	0.001205	0.066195	3.45	0.32	1.796	99.932	4.6156	4.1057	1.5541	3.5177
VBP1	NM_003372.4	4860358	X	154121137	-1.813	0.284599	-6.22	1.8e-05	0.007776	9.54	95.698	1.179	99.79	10.3255	10.573	8.3038	8.9697
SOCS2	NM_003877.3	1690692	12	92493453	-1.807	0.285785	-6.93	5e-06	0.005094	6.98	83.82	1.09	99.731	7.8879	7.8813	6.1279	6.028
TMED5	NM_016040.3	4210309	1	93617762	-1.807	0.285785	-6.33	1.5e-05	0.007501	8.09	90.191	1.156	99.761	8.7259	9.2655	7.018	7.3592
RAB15	NM_198686.1	5720392	14	64482581	-1.803	0.286578	-5.78	3.9e-05	0.011066	5.03	67.987	1.228	99.816	5.9014	5.9587	4.5917	3.6629
RAB23	NM_016277.3	6020719	6	57161608	-1.803	0.286578	-4.59	0.000373	0.034487	6.66	81.711	1.507	99.888	6.9207	8.193	5.2742	6.2333
COMMD8	NM_017845.3	1770400	4	47453547	-1.794	0.288371	-6.07	2.4e-05	0.008543	8.11	90.263	1.169	99.778	8.896	9.1166	6.8489	7.5754
BCAR3	NM_003567.2	4070053	1	94027798	-1.784	0.290377	-5.6	5.5e-05	0.012515	8.11	90.265	1.227	99.814	8.6307	9.372	6.8829	7.5514
KRT86	NM_002284.3	4280672	12	50989023	-1.783	0.290579	-5.89	3.2e-05	0.010254	4.11	28.831	1.176	99.788	4.9059	5.0961	2.8107	3.6262
CYP24A1	NM_000782.3	6400131	20	52203887	-1.78	0.291183	-6.72	8e-06	0.006141	9.65	95.981	1.069	99.71	10.4893	10.5957	8.8868	8.6375
PDGFB	NM_002608.1	4040397	22	37950040	-1.78	0.291183	-6.62	9e-06	0.006674	5.85	75.884	1.079	99.721	6.8042	6.6738	4.7866	5.1311
MYADM	NM_001020820.1	2970730	19	54379429	-1.779	0.291385	-6.29	1.6e-05	0.007501	8.91	93.767	1.116	99.744	9.6629	9.9349	7.7507	8.2885
NPTN	NM_017455.2	830553	15	71639488	-1.775	0.292194	-6.6	1e-05	0.00678	9.37	95.23	1.073	99.716	10.0708	10.4445	8.4712	8.4948
SERPINB9	NM_004155.3	1230156	6	2833461	-1.773	0.2926	-5.68	4.8e-05	0.012212	5.05	68.203	1.195	99.797	5.9434	5.93	4.6319	3.6949
SPAST	NM_014946.3	4480010	2	32235656	-1.769	0.293412	-6.52	1.1e-05	0.006829	6.09	77.705	1.072	99.714	6.8513	7.097	5.3753	5.0351
GJB3	NM_001005752.1	3420446	1	35024216	-1.767	0.293819	-6.28	1.6e-05	0.007555	5.93	76.56	1.097	99.737	6.8058	6.8264	5.3412	4.758
DDEF2	NM_003887.1	2030041	2	9462928	-1.764	0.294431	-6.24	1.7e-05	0.007767	6.8	82.719	1.097	99.735	7.4223	7.95	5.7817	6.0629
CCT6P1	NR_003110.2	5420053	7	64865437	-1.759	0.295453	-6.73	8e-06	0.006141	9.32	95.09	1.035	99.682	10.1358	10.2658	8.4029	8.4806
HOXA10	NM_153715.2	3290427	7	27185791	-1.754	0.296479	-6.54	1e-05	0.006816	4.98	67.415	1.046	99.689	5.8666	5.856	3.9306	4.2838
PM20D2	NM_001010853.1	50470	6	89874733	-1.753	0.296684	-6.36	1.4e-05	0.007501	6.58	81.114	1.066	99.704	7.2624	7.6457	5.5431	5.8579
MELK	NM_014791.2	2340392	9	36633149	-1.752	0.29689	-5.26	0.000103	0.018624	7.93	89.329	1.234	99.82	8.8441	8.7595	6.4889	7.6109
DPY19L4	NM_181787.1	2190544	8	95872884	-1.75	0.297302	-5.63	5.3e-05	0.012366	5.96	76.744	1.164	99.771	6.3733	7.2937	5.1314	5.0351
PRELID2	NM_205846.1	3450730	5	145139577	-1.749	0.297508	-4.61	0.000361	0.033926	4.14	31.393	1.392	99.864	5.008	5.015	4.0111	2.5148
TRAK2	NM_015049.1	110075	2	201950317	-1.748	0.297714	-6.4	1.3e-05	0.00745	6.97	83.756	1.052	99.695	7.838	7.8573	5.8742	6.325
KIAA1618	NM_020954.2	7400743	17	75909786	-1.747	0.297921	-6.27	1.7e-05	0.00757	6.11	77.843	1.067	99.706	7.0175	6.9425	5.5018	4.9635
LHX2	NM_004789.3	5550142	9	125834947	-1.74	0.29937	-5.78	3.9e-05	0.011066	7.18	85.025	1.121	99.748	7.722	8.3844	6.0722	6.5545
FUT8	NM_004480.3	7160181	14	65153612	-1.735	0.300409	-5.67	4.8e-05	0.012212	3.43	0.284	1.13	99.752	4.3546	4.2471	2.9986	2.1336
DARS2	NM_018122.3	5910097	1	172094085	-1.732	0.301034	-6.57	1e-05	0.006798	5.72	74.843	1.009	99.646	6.4824	6.6911	4.8035	4.9066
F2R	NM_001992.2	4570398	5	76066216	-1.731	0.301243	-6.42	1.3e-05	0.00732	5.81	75.569	1.023	99.672	6.7599	6.5897	4.7707	5.1174
TGFBR2	NM_001024847.1	5490070	3	30710194	-1.722	0.303128	-6.39	1.3e-05	0.007479	6.69	81.942	1.013	99.657	7.5699	7.5366	6.0209	5.6416
DCUN1D1	NM_020640.2	5220670	3	184144228	-1.72	0.303549	-5.78	4e-05	0.011066	5.99	77.009	1.089	99.729	6.5429	7.1626	4.8916	5.3737
SCML2	NM_006089.1	70112	X	18168178	-1.718	0.30397	-5.84	3.6e-05	0.010353	6.01	77.129	1.077	99.718	6.6933	7.0515	4.827	5.4819
PIM1	NM_002648.2	3130301	6	37250764	-1.717	0.304181	-6.45	1.2e-05	0.007171	5.78	75.342	1	99.634	6.7808	6.4929	4.8554	4.9835
LYPLA1	NM_006330.2	4480451	8	55121872	-1.711	0.305448	-6.33	1.5e-05	0.007501	4.76	63.816	1.002	99.636	5.522	5.7096	4.0803	3.729
MTPN	NM_145808.2	5890630	7	135262518	-1.704	0.306934	-6.32	1.5e-05	0.007501	8.1	90.218	0.993	99.627	8.8554	9.0443	7.0764	7.4157
LOC728285	XM_001127070.1	3940673	17	36469376	-1.704	0.306934	-6.3	1.6e-05	0.007501	6.86	83.02	0.995	99.632	7.8949	7.5215	5.9314	6.077
ASAP2	NM_003887.2	5340646	2	9545148	-1.695	0.308855	-6.06	2.4e-05	0.008587	6.69	81.948	1.009	99.649	7.2624	7.8178	5.8631	5.8274
TNPO1	NM_002270.3	3940092	5	72112499	-1.691	0.309712	-5.6	5.6e-05	0.012515	3.61	1.37	1.07	99.712	4.2311	4.6845	2.416	3.1167
CAST	NM_001042445.1	3990112	5	96109174	-1.674	0.313383	-5.84	3.5e-05	0.010353	6.07	77.544	1.004	99.642	7.1597	6.6553	5.4392	5.0288
HES1	NM_005524.2	1010528	3	193856060	-1.673	0.313601	-6.21	1.8e-05	0.007776	5.71	74.769	0.958	99.581	6.4216	6.6748	4.7324	5.0172
ERRFI1	NM_018948.2	7100639	1	7994689	-1.672	0.313818	-6.32	1.5e-05	0.007501	10.49	97.684	0.944	99.547	11.4337	11.2157	9.7305	9.5753
BTBD3	NM_014962.2	10608	20	11854410	-1.668	0.314689	-6.1	2.2e-05	0.008366	6.71	82.054	0.963	99.591	7.6758	7.4149	5.688	6.0662
CKAP2	NM_018204.2	7040711	13	51948405	-1.664	0.315563	-6.1	2.2e-05	0.008366	6.29	79.134	0.956	99.577	7.0976	7.1468	5.6807	5.2361
P15RS	NM_018170.2	270524	18	31823897	-1.664	0.315563	-5.27	0.000102	0.018451	9.03	94.169	1.08	99.723	9.6007	10.1138	7.7814	8.6047
LIMS1	XM_938773.1	990358			-1.655	0.317538	-6.33	1.5e-05	0.007501	8.47	91.967	0.916	99.507	9.2945	9.2932	7.5679	7.7098
YAP1	NM_006106.2	3360768	11	101608998	-1.653	0.317978	-5.76	4.1e-05	0.011066	7.04	84.161	0.982	99.615	7.5358	8.1905	6.2014	6.2186
GMNN	NM_015895.3	4830373	6	24785941	-1.649	0.318861	-5.92	3.1e-05	0.010254	7.87	89.018	0.956	99.574	8.4677	8.9206	6.8944	7.1953
RBP1	NM_002899.2	6650731	3	140719986	-1.648	0.319082	-6.03	2.5e-05	0.009041	10.29	97.328	0.94	99.536	11.1064	11.1169	9.2352	9.6921
C13orf1	NM_020456.1	4010554	13	49385160	-1.645	0.319746	-5.63	5.2e-05	0.012331	5.89	76.251	0.988	99.623	6.6122	6.8224	4.7289	5.4161
NR2F2	NM_021005.2	7380202	15	94682618	-1.644	0.319968	-6.13	2.1e-05	0.008209	8.18	90.64	0.921	99.513	8.8409	9.1659	7.2909	7.4285
VBP1	NM_003372.4	5360221	X	154120597	-1.64	0.320856	-5.77	4.1e-05	0.011066	9.2	94.711	0.962	99.587	9.9416	10.106	8.0827	8.6843
ALCAM	NM_001627.2	2070575	3	105295394	-1.639	0.321079	-6.1	2.2e-05	0.008366	7.38	86.263	0.918	99.509	8.1248	8.2802	6.3968	6.7303
F2RL1	NM_005242.3	5810047	5	76166279	-1.638	0.321302	-6.07	2.4e-05	0.008548	7.72	88.249	0.92	99.511	8.3451	8.7329	6.8719	6.9301
SOCS2	NM_003877.3	6770673	12	92493848	-1.637	0.321524	-6.09	2.3e-05	0.00844	8.7	92.924	0.916	99.505	9.5841	9.4539	7.7098	8.0549
SGPL1	NM_003901.2	3370273	10	72309382	-1.636	0.321747	-6.2	1.9e-05	0.007776	5.72	74.894	0.901	99.481	6.66	6.4259	4.9206	4.8943
PDLIM7	NM_213636.1	4560164	5	176917287	-1.635	0.32197	-5.97	2.8e-05	0.009812	6.78	82.564	0.928	99.524	7.83	7.366	5.9965	5.9296
VRK1	NM_003384.2	2600739	14	96412169	-1.626	0.323985	-5.56	6e-05	0.01273	7.12	84.658	0.969	99.598	7.7175	8.1537	6.0195	6.5999
MAOA	NM_000240.2	6550528	X	43490870	-1.623	0.32466	-6.19	1.9e-05	0.007776	7.21	85.122	0.885	99.443	7.94	8.094	6.3363	6.4507
RAB11FIP2	NM_014904.1	4760630	10	119754684	-1.621	0.32511	-6.22	1.8e-05	0.007776	7.27	85.546	0.877	99.435	8.0391	8.1217	6.4317	6.4879
YRDC	NM_024640.3	3440224	1	38268850	-1.618	0.325787	-6.19	1.9e-05	0.007776	9.63	95.922	0.876	99.428	10.5051	10.3803	8.8517	8.7978
AASDHPPT	NM_015423.2	6060767	11	105473754	-1.617	0.326013	-5.57	5.8e-05	0.012672	7.06	84.309	0.953	99.562	7.6532	8.087	5.9793	6.5278
ASAP2	NM_003887.2	2750674	2	9545233	-1.617	0.326013	-5.39	8.2e-05	0.015719	6.03	77.276	0.982	99.613	6.4608	7.2178	5.0749	5.3697
HIF1A	NM_001530.2	6220543	14	61282171	-1.616	0.326239	-6.18	2e-05	0.007864	5.81	75.573	0.875	99.426	6.6194	6.616	4.9206	5.0823
SH2B3	NM_005475.1	6560301	12	110373463	-1.614	0.326691	-5.2	0.000115	0.019381	6.44	80.193	1.007	99.644	6.9727	7.529	5.2742	6.0001
ARID3B	NM_006465.2	5960670	15	72677313	-1.611	0.327371	-6.19	1.9e-05	0.007776	7.08	84.377	0.866	99.414	7.9034	7.8595	6.2448	6.2968
ARSB	NM_000046.2	270215	5	78108988	-1.609	0.327826	-5.54	6.1e-05	0.013019	5.55	73.316	0.944	99.549	6.0069	6.7017	4.7866	4.7047
DEPDC1B	NM_018369.1	2370441	5	59928585	-1.603	0.329192	-5.42	7.7e-05	0.015136	6.73	82.198	0.954	99.566	7.2358	7.8256	5.6853	6.1693
JAZF1	NM_175061.3	3520463	7	27871165	-1.602	0.32942	-5.84	3.6e-05	0.010353	5.57	73.509	0.893	99.469	6.1393	6.6038	4.8154	4.7237
CCT6P1	NR_003110.2	3460703	7	64857033	-1.594	0.331252	-5.77	4.1e-05	0.011066	5.12	69.006	0.889	99.458	6.0697	5.7645	4.526	4.121
KATNAL1	NM_001014380.1	2470600	13	30777013	-1.593	0.331481	-6	2.7e-05	0.009365	6.46	80.333	0.859	99.399	7.4014	7.1166	5.6911	5.6416
DR1	NM_001938.2	4890706	1	93600166	-1.588	0.332632	-5.26	0.000104	0.018736	7.55	87.248	0.955	99.57	8.0048	8.6878	6.5217	6.9956
CHORDC1	NM_012124.1	380528	11	89574953	-1.585	0.333325	-5.38	8.3e-05	0.015906	8.78	93.261	0.931	99.53	9.4523	9.69	7.6299	8.3428
LOC652489	XM_941950.2	6650228			-1.584	0.333556	-5.51	6.6e-05	0.013654	9.37	95.217	0.911	99.496	9.9336	10.3817	8.3253	8.8211
TMEM51	NM_018022.1	380102	1	15419242	-1.58	0.334482	-5.6	5.5e-05	0.012515	8.59	92.475	0.889	99.46	9.3887	9.3752	7.5079	8.0969
ALOX5AP	NM_001629.2	3930343	13	30236347	-1.58	0.334482	-4.85	0.000227	0.02721	5.01	67.784	1.021	99.668	6.2944	5.3127	4.0177	4.4291
PRKRIR	NM_004705.2	1820253	11	76061293	-1.579	0.334714	-5.36	8.6e-05	0.016205	8.29	91.209	0.926	99.522	8.8498	9.3143	7.2076	7.7976
EIF2AK1	NM_001134335.1	4120154	7	6062133	-1.577	0.335178	-5.99	2.7e-05	0.009532	6.5	80.625	0.838	99.358	7.405	7.176	5.7317	5.6943
KRT80	NM_182507.2	2340193	12	52563035	-1.577	0.335178	-5.65	5e-05	0.012212	6.22	78.679	0.88	99.437	7.2002	6.8181	5.2343	5.6295
ECM1	NM_022664.1	3450521	1	148752549	-1.573	0.336109	-5.19	0.000118	0.019568	5.13	69.065	0.943	99.545	6.0069	5.8174	4.7505	3.9281
RRM2B	NM_015713.3	7150224	8	103288170	-1.572	0.336342	-4.84	0.00023	0.027297	6.41	79.981	1.009	99.651	7.2745	7.1252	5.1057	6.1493
LOC387882	NM_207376.1	5810743	12	104288777	-1.571	0.336575	-5.07	0.000149	0.021376	8.47	92.009	0.962	99.589	9.0793	9.4409	7.2693	8.1093
LOC100131336	XR_038376.1	1850050	6	86059114	-1.561	0.338916	-5.58	5.7e-05	0.012642	8.29	91.169	0.863	99.409	8.8706	9.2614	7.3081	7.7024
ADD3	NM_001121.2	1990468	10	111883660	-1.56	0.339151	-5.86	3.5e-05	0.010353	7.36	86.155	0.828	99.337	8.0131	8.272	6.6698	6.495
KLHDC5	NM_020782.1	4490273	12	27846826	-1.56	0.339151	-5.58	5.7e-05	0.012672	8.61	92.541	0.863	99.407	9.3153	9.4648	7.5616	8.0981
BRCC3	NM_024332.2	4230259	X	154003954	-1.56	0.339151	-5.03	0.000161	0.022279	6.06	77.498	0.952	99.56	6.9302	6.7541	4.8312	5.7322
TRIAP1	NM_016399.2	2600184	12	120881849	-1.558	0.339622	-5.94	3e-05	0.010137	9.35	95.181	0.816	99.303	10.2269	10.0361	8.5786	8.5674
LOC100129267	XR_037397.1	5270551			-1.558	0.339622	-5.77	4e-05	0.011066	5.62	74.002	0.835	99.354	6.3382	6.4698	5.0319	4.6595
EIF5A2	NM_020390.5	2190356	3	172089591	-1.556	0.340093	-5.8	3.8e-05	0.010984	5.71	74.775	0.828	99.339	6.3315	6.648	4.8508	5.0172
GSTT2	NM_001080843.1	2360215			-1.556	0.340093	-4.91	0.000202	0.025216	6.05	77.426	0.967	99.593	7.1884	6.4733	5.6111	4.939
EFR3A	NM_015137.3	110161	8	133025013	-1.553	0.340801	-5.36	8.6e-05	0.016205	8.64	92.657	0.883	99.441	9.3546	9.4786	7.5241	8.2038
PBX3	NM_006195.4	2470634	9	127769242	-1.551	0.341273	-5	0.000169	0.022831	6.17	78.372	0.942	99.543	6.636	7.2627	5.0638	5.7322
TACC1	NM_006283.1	2940373	8	38829434	-1.55	0.34151	-5.39	8.2e-05	0.015719	8.16	90.544	0.875	99.424	8.6414	9.2385	7.2406	7.5396
TJP1	NM_003257.3	5700504	15	29992875	-1.549	0.341747	-5.91	3.2e-05	0.010254	7.52	87.068	0.806	99.28	8.2165	8.3793	6.7062	6.7913
LRRC58	NM_001099678.1	1690161	3	121526807	-1.549	0.341747	-5.89	3.3e-05	0.010254	6.98	83.778	0.808	99.293	7.7175	7.7836	6.3056	6.0966
ITGA2	NM_002203.3	3890541	5	52386964	-1.546	0.342458	-5.85	3.5e-05	0.010353	5.35	71.447	0.807	99.289	6.1557	6.0962	4.4559	4.7047
CCND1	NM_053056.2	5820601	11	69178329	-1.546	0.342458	-5.69	4.7e-05	0.01213	11.64	98.933	0.827	99.333	12.614	12.2134	10.9401	10.7958
SPPL2A	NM_032802.3	4920398	15	51012170	-1.545	0.342696	-5.92	3.1e-05	0.010254	7.65	87.824	0.798	99.259	8.3707	8.468	6.8418	6.9062
GNG10	NM_001017998.2	450348	9	113463766	-1.545	0.342696	-4.88	0.000214	0.026094	7.96	89.501	0.955	99.568	8.6999	8.7681	6.7012	7.6773
HIF1A	NM_181054.1	2680722	14	61284383	-1.544	0.342933	-5.65	5e-05	0.012212	6.9	83.293	0.828	99.342	7.6953	7.6445	6.3515	5.9011
RN5S9	NR_023371.1	2570220	1	228763927	-1.544	0.342933	-4.21	0.000801	0.053057	8.48	92.035	1.123	99.75	9.044	9.4584	8.3777	7.0366
TFAP2B	NM_003221.3	4670044	6	50813432	-1.54	0.343885	-5.45	7.2e-05	0.014678	3.73	3.659	0.849	99.373	4.6515	4.347	2.7042	3.2152
LOC647447	XM_942944.1	2490632			-1.537	0.344601	-4.79	0.000253	0.028338	3.83	7.357	0.959	99.585	5.0205	4.1805	2.7776	3.35
	AK092218	4890431	17	5315953	-1.535	0.345079	-5.88	3.3e-05	0.010254	5.77	75.285	0.789	99.24	6.575	6.4987	5.0564	4.9464
CYP26B1	NM_019885.2	6280224	2	72356794	-1.534	0.345319	-5.59	5.6e-05	0.012515	7.44	86.619	0.821	99.318	8.003	8.4071	6.5516	6.7913
RHPN2	NM_033103.3	5960475	19	38161365	-1.533	0.345558	-5.84	3.6e-05	0.010353	8.87	93.621	0.79	99.242	9.593	9.6829	8.195	8.0156
LOC642035	XM_936105.1	4040086			-1.529	0.346517	-5.7	4.6e-05	0.012089	4.83	65.194	0.802	99.27	5.43	5.7645	3.9962	4.1394
RAB31	NM_006868.2	6590341	18	9852301	-1.525	0.34748	-5.53	6.3e-05	0.013179	8.43	91.836	0.817	99.308	9.0448	9.3408	7.467	7.8683
	AK056736	4220059	X	21812927	-1.524	0.34772	-5.68	4.7e-05	0.012146	6.61	81.334	0.795	99.25	7.2122	7.5215	5.7561	5.9296
GCSH	NM_004483.3	60196	16	81129743	-1.522	0.348203	-5.22	0.000111	0.019129	8.83	93.464	0.857	99.392	9.7043	9.4686	7.7282	8.4009
MRPL50	NM_019051.1	2060152	9	103192266	-1.515	0.349896	-5.65	5e-05	0.012212	9.25	94.849	0.786	99.231	9.8766	10.1358	8.3701	8.6129
TRIM25	NM_005082.4	5260612	17	54965593	-1.515	0.349896	-5.25	0.000106	0.018826	7.38	86.265	0.842	99.365	8.3604	7.9213	6.3664	6.8852
RN7SK	NR_001445.1	2640719	6	52968570	-1.514	0.350139	-5.43	7.6e-05	0.015016	8.19	90.654	0.813	99.301	9.0455	8.8386	7.6808	7.176
TAGLN	NM_003186.3	2360326	11	116579329	-1.512	0.350625	-5.66	5e-05	0.012212	4.93	66.723	0.782	99.212	5.5166	5.854	4.1685	4.1772
SLC10A4	NM_152679.2	7000176	4	48185684	-1.511	0.350868	-5.63	5.2e-05	0.012355	6.68	81.853	0.783	99.221	7.4289	7.4436	5.7439	6.1062
PLA2G4D	NM_178034.1	3360551	15	40146959	-1.511	0.350868	-3.59	0.002741	0.104504	3.81	6.297	1.295	99.837	4.7523	4.3772	2.1785	3.9281
BCOR	NM_017745.4	510576	X	39795901	-1.51	0.351111	-5.43	7.5e-05	0.014968	6.17	78.347	0.807	99.284	6.8206	7.0272	5.6589	5.1698
RAB11FIP2	NM_014904.1	4860180	10	119754953	-1.509	0.351355	-5.66	4.9e-05	0.012212	6.14	78.146	0.775	99.198	7.05	6.7446	5.4252	5.3515
TXN	NM_003329.2	4290543	9	113013737	-1.508	0.351598	-5.61	5.4e-05	0.012515	11.51	98.829	0.782	99.214	12.1158	12.4091	10.6387	10.8692
PREPL	NM_006036.2	3940653	2	44399027	-1.504	0.352574	-5.53	6.2e-05	0.013155	6.77	82.482	0.785	99.225	7.4353	7.6005	5.8157	6.2121
API5	NM_006595.2	7050523	11	43322265	-1.502	0.353064	-5.23	0.000109	0.019129	8.12	90.35	0.825	99.327	8.5965	9.1562	7.1994	7.5493
SLC2A3	NM_006931.1	3800168	12	7963180	-1.502	0.353064	-5.04	0.000157	0.021972	5.51	72.952	0.855	99.39	6.0729	6.4471	4.4113	5.1052
RUNX1	NM_001754.3	7400368	21	35082209	-1.501	0.353308	-5.77	4e-05	0.011066	5.33	71.237	0.752	99.157	6.084	6.0821	4.5552	4.6083
MRPL35	NM_016622.2	6760022	2	86292835	-1.5	0.353553	-5.34	8.9e-05	0.016578	6.53	80.801	0.805	99.276	7.0856	7.4691	5.5634	5.9909
LRP8	NM_017522.3	4780411	1	53711532	-1.498	0.354044	-5.14	0.000129	0.020303	6.89	83.208	0.832	99.348	7.6516	7.6199	5.7838	6.4925
ALG13	NM_018466.3	6660411	X	110814959	-1.494	0.355027	-5.69	4.7e-05	0.012146	8.5	92.132	0.75	99.155	9.1428	9.3465	7.7475	7.7547
LARP6	NM_018357.2	4830433	15	71123993	-1.493	0.355273	-4.9	0.000204	0.025322	6.71	82.063	0.866	99.416	7.1584	7.7599	5.6589	6.2727
PPAT	NM_002703.3	4070132	4	57259919	-1.491	0.355766	-5.23	0.00011	0.019129	8.87	93.61	0.807	99.286	9.7173	9.5105	7.8247	8.422
HS6ST2	NM_001077188.1	830491	X	131762139	-1.49	0.356013	-5.05	0.000154	0.021669	6.33	79.397	0.835	99.352	6.7521	7.3965	5.7808	5.3877
MOSPD1	NM_019556.1	2680433	X	134021848	-1.483	0.357744	-4.87	0.000216	0.026269	6.83	82.865	0.855	99.384	7.4722	7.6652	6.503	5.6695
ETV4	NM_001986.1	70209	17	38961026	-1.478	0.358986	-4.7	0.000303	0.030797	7.14	84.766	0.881	99.439	8.106	7.65	5.9793	6.8217
CNIH2	NM_182553.1	670398	11	65808112	-1.477	0.359235	-5.56	5.9e-05	0.012696	5.7	74.593	0.742	99.128	6.2944	6.5722	5.0051	4.9066
DCK	NM_000788.1	5290703	4	72114509	-1.476	0.359484	-4.45	0.000498	0.040552	6.61	81.364	0.934	99.532	6.839	7.856	5.6395	6.1039
ARL8B	NM_018184.2	130685	3	5196802	-1.475	0.359733	-5.15	0.000126	0.020111	7.72	88.243	0.794	99.248	8.163	8.7491	6.845	7.1178
STAU2	NM_014393.1	7550139	8	74624808	-1.474	0.359983	-4.79	0.000255	0.02841	6.31	79.291	0.857	99.394	7.0207	7.0814	5.1314	6.0228
LYPLA1	NM_006330.2	70300	8	55126215	-1.473	0.360232	-5.47	7e-05	0.014285	5.88	76.132	0.746	99.143	6.6046	6.6295	5.3312	4.9576
CUL2	NM_003591.2	2000193	10	35345181	-1.473	0.360232	-5	0.00017	0.022911	8.16	90.515	0.817	99.306	9.1588	8.6314	7.1554	7.6896
SLC12A2	NM_001046.2	4220041	5	127520111	-1.473	0.360232	-4.55	0.000402	0.035876	7.26	85.507	0.904	99.486	7.6548	8.3444	6.1365	6.917
MANEA	NM_024641.2	4610091	6	96056815	-1.472	0.360482	-4.62	0.000355	0.033684	5.55	73.35	0.888	99.454	5.9014	6.679	4.5062	5.1311
PARVA	NM_018222.2	1940390	11	12508648	-1.471	0.360732	-5.35	8.8e-05	0.016478	5.26	70.577	0.76	99.176	6.0775	5.9206	4.2985	4.758
MTPN	NM_145808.1	4210128	7	135262101	-1.469	0.361233	-5.08	0.000145	0.021155	9.86	96.492	0.798	99.257	10.4374	10.7597	8.8269	9.4313
PFKP	NM_002627.3	2360452	10	3149455	-1.468	0.361483	-5.3	9.5e-05	0.017549	10.13	97.006	0.762	99.181	10.9853	10.7355	9.1689	9.6168
TWISTNB	NM_001002926.1	5570343	7	19735411	-1.464	0.362487	-4.51	0.000439	0.037658	5.84	75.808	0.9	99.479	6.0428	7.0955	5.0784	5.1311
MGC40489	XR_016048.1	3420400	17	60181150	-1.463	0.362738	-5.6	5.5e-05	0.012515	9.21	94.722	0.716	99.062	9.9848	9.8949	8.4225	8.5319
RBM47	NM_001098634.1	4780600	4	40425558	-1.463	0.362738	-5.55	6e-05	0.012826	7.44	86.602	0.722	99.077	8.0596	8.277	6.6668	6.7445
BTBD3	NM_014962.2	6020653	20	11854867	-1.463	0.362738	-5.51	6.5e-05	0.013491	7.08	84.379	0.728	99.096	7.9524	7.6645	6.3376	6.3524
POLR3F	NM_006466.2	610019	20	18413153	-1.462	0.36299	-5.58	5.7e-05	0.012672	7.1	84.54	0.718	99.068	7.8602	7.8079	6.4594	6.2841
STX11	NM_003764.2	60470	6	144550749	-1.462	0.36299	-5.39	8.1e-05	0.015688	5.48	72.666	0.741	99.126	6.0244	6.3986	4.8394	4.6595
IKBIP	NM_153687.2	3170605	12	99018177	-1.461	0.363241	-5.62	5.3e-05	0.01249	4.9	66.389	0.712	99.039	5.6415	5.6252	4.1943	4.1497
CAST	NM_001042442.1	6560136	5	96108707	-1.459	0.363745	-5.57	5.9e-05	0.012672	7.12	84.65	0.715	99.054	7.803	7.8993	6.468	6.3169
TMEM14A	NM_014051.3	3780619	6	52546654	-1.458	0.363997	-4.96	0.000183	0.023744	8.85	93.544	0.801	99.267	9.3844	9.77	7.8015	8.4366
ZCCHC9	NM_032280.1	940338	5	80644316	-1.457	0.36425	-4.83	0.000235	0.027311	8.66	92.753	0.822	99.322	9.2578	9.5168	7.5363	8.3236
RAB23	NM_016277.3	3930047	6	57162268	-1.456	0.364502	-4.55	0.000407	0.036218	5.18	69.708	0.877	99.433	5.5418	6.2722	4.1014	4.801
ANTXR1	NM_018153.2	60255	2	69226712	-1.453	0.365261	-5.08	0.000145	0.021155	5.51	72.988	0.772	99.191	6.1902	6.2908	5.1057	4.47
CASC4	NM_177974.1	3400138	15	42493788	-1.45	0.366021	-5.44	7.4e-05	0.014957	6.2	78.501	0.717	99.064	6.8751	6.9648	5.3191	5.6211
KPNA2	NM_002266.2	4230196	17	63469563	-1.447	0.366783	-5.29	9.9e-05	0.018002	9.49	95.573	0.734	99.109	10.3065	10.1282	8.5564	8.9844
YOD1	NM_018566.3	4590020	1	207217681	-1.447	0.366783	-5.22	0.000111	0.019129	7.51	86.992	0.743	99.13	8.1014	8.3669	7.0094	6.5642
RBM47	NM_019027.3	2320576	4	40426007	-1.444	0.367547	-5.44	7.5e-05	0.014968	6.96	83.638	0.709	99.03	7.5358	7.8172	6.1928	6.2727
PFDN4	NM_002623.3	7200471	20	52269671	-1.438	0.369079	-5.2	0.000116	0.019438	5.9	76.263	0.733	99.107	6.5785	6.654	5.4313	4.9256
RNASE4	NM_194430.1	7040333	14	20231556	-1.437	0.369335	-5.19	0.000118	0.019566	5.57	73.522	0.732	99.104	6.4036	6.1779	5.0842	4.6238
CPEB2	NM_182646.1	4830382	4	14679932	-1.436	0.369591	-5.22	0.000112	0.019129	4.82	64.991	0.727	99.09	5.6199	5.4597	4.3333	3.8743
HIF1A	NM_001530.2	4900010	14	61277556	-1.425	0.372419	-5.42	7.7e-05	0.015215	5.32	71.059	0.685	98.937	5.9319	6.124	4.6567	4.5486
SNCA	NM_000345.2	5960564	4	90869394	-1.425	0.372419	-4.19	0.000833	0.053994	4.53	57.699	0.913	99.502	4.7253	5.7553	4.1133	3.5177
AASDHPPT	NM_015423.2	7040717	11	105474164	-1.424	0.372678	-4.79	0.000256	0.02841	8.73	93.026	0.779	99.206	9.0994	9.7802	7.8206	8.2103
PKMYT1	NM_182687.1	2510678	16	3024383	-1.421	0.373453	-4.54	0.000414	0.036549	6.2	78.542	0.821	99.32	7.072	6.7488	5.0465	5.933
XIRP1	NM_194293.2	780711	3	39224937	-1.417	0.37449	-2.52	0.023739	0.289536	3.13	0.011	1.88	99.949	3.4975	4.1884	3.729	1.1235
BHLHB2	NM_003670.1	2640735	3	5001452	-1.416	0.37475	-5.41	7.8e-05	0.015215	9	94.097	0.672	98.895	9.6368	9.7832	8.274	8.3147
SLC25A43	NM_145305.1	1850021	X	118472026	-1.413	0.37553	-4.71	0.000299	0.030717	7.61	87.601	0.776	99.2	8.1885	8.4355	6.5117	7.2864
LIN9	NM_173083.2	6420703	1	226419440	-1.411	0.376051	-4.66	0.000329	0.032019	5.92	76.49	0.783	99.219	6.3001	6.9593	4.9549	5.4819
LOC644363	XR_016912.2	5670497	8	79834317	-1.41	0.376312	-4.25	0.000736	0.050794	7.77	88.495	0.87	99.42	8.161	8.7887	6.6031	7.5269
CDCP1	NM_178181.1	60215	3	45152240	-1.409	0.376573	-5.15	0.000126	0.020111	5.75	75.082	0.697	98.984	6.3584	6.5427	4.8312	5.2512
IL8	NM_000584.2	1980309	4	74609125	-1.407	0.377095	-3.89	0.001499	0.074233	6.83	82.859	0.968	99.596	6.9776	8.0836	6.519	5.7276
SNCA	NM_007308.1	5360273	4	90866610	-1.403	0.378142	-5.07	0.000147	0.021282	5.97	76.795	0.699	98.999	6.706	6.6295	5.0129	5.5167
MYEOV	NM_138768.2	6100360	11	68820979	-1.401	0.378667	-5.22	0.000112	0.019129	6.52	80.782	0.675	98.905	7.3566	7.093	5.9457	5.7026
DEPDC1B	NM_018369.1	7330338	5	59935142	-1.399	0.379192	-4.9	0.000204	0.025312	5.59	73.659	0.719	99.071	6.1643	6.4089	4.595	5.1808
ERI1	NM_153332.3	5360398	8	8890610	-1.397	0.379718	-4.62	0.000356	0.033684	7.38	86.274	0.768	99.185	7.9429	8.224	6.2912	7.0815
PARP12	NM_022750.2	2340072	7	139723786	-1.395	0.380245	-5.06	0.000151	0.021472	6.61	81.339	0.689	98.956	7.4722	7.1337	5.7273	6.0889
ADM	NM_001124.1	5670465	11	10285345	-1.393	0.380772	-4.8	0.000251	0.028204	8.3	91.271	0.728	99.098	9.3431	8.6583	7.6814	7.5344
LOC389834	NM_001013655.1	1740239	4|NT_113889.1	51062	-1.392	0.381036	-4.97	0.000179	0.023317	4.92	66.617	0.698	98.99	5.4806	5.7533	4.4706	3.9795
C14orf129	NM_016472.3	5700301	14	95922696	-1.391	0.3813	-4.99	0.000174	0.023101	7.1	84.502	0.695	98.977	7.7959	7.787	6.1258	6.6746
PLEKHA1	NM_001001974.1	6650324	10	124180729	-1.389	0.381829	-5.07	0.000148	0.021282	8.85	93.547	0.68	98.922	9.4599	9.627	7.9365	8.3719
PLEKHA1	NM_021622.3	3930541	10	124172520	-1.385	0.382889	-5.19	0.000118	0.019568	7.98	89.634	0.657	98.838	8.7172	8.6324	7.1322	7.4474
NPTN	NM_012428.2	430307	15	71639809	-1.381	0.383953	-5.22	0.000112	0.019129	8.22	90.856	0.648	98.791	8.7772	9.0461	7.5112	7.5493
AADACL1	NM_020792.3	7210327	3	173831263	-1.381	0.383953	-5.02	0.000163	0.022476	7.06	84.301	0.675	98.903	7.5184	7.984	6.2984	6.4419
BTBD7	NM_001002860.2	1780403	14	93704341	-1.378	0.384752	-5.08	0.000145	0.021155	5.94	76.59	0.662	98.855	6.5384	6.7131	5.4366	5.0584
GPX8	NM_001008397.2	4730138	5	54462826	-1.375	0.385553	-5.06	0.000151	0.021472	7.04	84.159	0.661	98.846	7.838	7.6099	6.1681	6.5301
MYL9	NM_006097.3	2480327	20	34609851	-1.374	0.38582	-4.81	0.000246	0.027978	5.51	72.927	0.699	98.994	6.4446	5.9436	5.0228	4.6171
CSDC2	NM_014460.2	3840349	22	40302546	-1.373	0.386088	-4.36	0.000595	0.04541	4.88	66.073	0.784	99.223	6.0503	5.0871	4.2318	4.1591
ERCC1	NM_001983.2	3610474	19	50618911	-1.371	0.386623	-4.9	0.000205	0.025396	5.25	70.505	0.678	98.914	5.7224	6.1585	4.3954	4.7444
LYSMD2	NM_153374.1	770538	15	49802846	-1.368	0.387428	-4.91	0.0002	0.02516	8.59	92.458	0.672	98.897	9.2325	9.3122	7.6374	8.1709
USMG5	NM_032747.2	2320253	10	105154019	-1.365	0.388234	-4.86	0.000222	0.026771	7	83.932	0.677	98.91	7.9312	7.4347	6.4636	6.1716
ETV4	NM_001986.2	990577	17	41605498	-1.364	0.388504	-4.77	0.000266	0.029072	6.84	82.914	0.69	98.96	7.6889	7.3492	5.8786	6.431
PLAUR	NM_001005376.1	6220671	19	48848309	-1.364	0.388504	-4.68	0.000312	0.03112	6.81	82.751	0.704	99.02	7.3324	7.649	5.809	6.4446
TNFSF12	NM_003809.2	1090747	17	7401691	-1.363	0.388773	-4.91	0.0002	0.02516	5.61	73.867	0.665	98.872	6.5447	6.0409	4.8598	5.0004
	AF131784	7040682	18	50713547	-1.361	0.389312	-5.03	0.000159	0.022185	5.75	75.112	0.644	98.778	6.2277	6.6295	5.0638	5.0718
ZNF532	NM_018181.4	2360437	18	54804526	-1.36	0.389582	-4.99	0.000173	0.023089	4.88	65.978	0.648	98.793	5.4653	5.6472	3.9962	4.3972
ANKRD46	NM_198401.2	2750598	8	101602463	-1.359	0.389852	-5.12	0.000135	0.020831	7.95	89.443	0.629	98.696	8.7143	8.5445	7.1536	7.3881
KIAA0895	NM_015314.2	3890164	7	36364797	-1.358	0.390123	-5.21	0.000113	0.019129	6.56	81.021	0.616	98.63	7.1962	7.2814	5.8851	5.8763
STIP1	NM_006819.1	620711	11	63728307	-1.358	0.390123	-5.12	0.000135	0.020831	10.04	96.83	0.629	98.685	10.7721	10.6559	9.2248	9.487
LAT2	NM_022040.2	3060092	7	73281882	-1.358	0.390123	-5.02	0.000164	0.022503	4.89	66.16	0.643	98.774	5.7267	5.4051	4.3333	4.0817
KCTD14	NM_023930.3	2940632	11	77727167	-1.358	0.390123	-4.69	0.000311	0.03112	7.4	86.373	0.695	98.973	8.2052	7.9522	6.3982	7.0433
TXN	NM_003329.2	3940446	9	113018706	-1.357	0.390393	-5.05	0.000154	0.021669	11.9	99.145	0.636	98.736	12.5822	12.5791	11.0402	11.4074
GSTT2B	NM_001080843.2	6980504	22	24300844	-1.357	0.390393	-4.56	0.000398	0.035673	6.48	80.451	0.716	99.06	7.5382	6.7793	5.901	5.7026
	BE622355	540747	18	27906836	-1.356	0.390664	-5.02	0.000162	0.022418	7.69	88.059	0.638	98.751	8.338	8.3967	6.8177	7.2057
CCNJ	NM_019084.2	6110433	10	97809986	-1.355	0.390935	-5.15	0.000128	0.020182	5.95	76.67	0.62	98.647	6.7353	6.5138	5.277	5.2615
MYO5B	NM_001080467.1	1440014	18	45603353	-1.353	0.391477	-4.67	0.00032	0.03147	5.69	74.58	0.689	98.954	6.2083	6.5304	5.3225	4.7111
SGOL2	NM_152524.3	3520754	2	201146843	-1.352	0.391749	-4.83	0.000235	0.027311	6.44	80.163	0.662	98.848	6.8513	7.3829	5.6762	5.8542
SNORD56	NR_002739.1	2450020	20	2585290	-1.351	0.39202	-5.07	0.000147	0.021282	6.92	83.407	0.624	98.66	7.4918	7.6987	6.1311	6.3584
TCEA1	NM_201437.1	110427	8	55054168	-1.35	0.392292	-4.69	0.000306	0.030926	7.17	84.957	0.681	98.924	7.6198	8.0685	6.2491	6.74
	AK056963	2450114	1	212589151	-1.349	0.392564	-5.15	0.000126	0.020111	6.13	78.055	0.611	98.603	6.8852	6.7311	5.4313	5.4866
C14orf129	NM_016472.3	5890608	14	95922894	-1.347	0.393109	-5.09	0.000143	0.021155	6.39	79.795	0.617	98.639	6.9657	7.162	5.809	5.6246
NKD1	NM_033119.3	5570025	16	49225787	-1.347	0.393109	-4.19	0.00082	0.053483	4.78	64.267	0.778	99.204	5.7028	5.2084	4.5552	3.6629
ANLN	NM_018685.2	6450669	7	36446055	-1.346	0.393381	-4.73	0.000284	0.029833	7.96	89.505	0.668	98.88	8.3264	8.944	7.3293	7.2501
ELL2	NM_012081.4	610270			-1.345	0.393654	-5.15	0.000128	0.020182	5.83	75.713	0.606	98.573	6.5016	6.495	5.0842	5.222
CENPM	NM_001002876.1	3930324	22	42342428	-1.345	0.393654	-4.94	0.00019	0.02433	5.66	74.294	0.635	98.73	6.5217	6.1448	4.8764	5.0998
RBM24	NM_153020.1	6450041	6	17400890	-1.345	0.393654	-4.76	0.000268	0.029072	5.14	69.198	0.662	98.861	6.058	5.5604	4.6292	4.2992
CKAP2	NM_001098525.1	1050672	13	51947829	-1.342	0.394473	-4.8	0.000248	0.028105	6.14	78.144	0.652	98.812	6.6858	6.9414	5.2251	5.718
RNU6-15	NR_028372.1	4780504			-1.34	0.395021	-5.12	0.000134	0.020736	10.07	96.894	0.603	98.556	10.6625	10.8099	9.4198	9.372
FRMD6	NM_152330.2	7510309	14	51266219	-1.339	0.395295	-4.54	0.000411	0.036457	5.82	75.622	0.691	98.963	6.3382	6.6295	4.7994	5.4911
VIM	NM_003380.2	7050019	10	17317867	-1.336	0.396117	-5.02	0.000164	0.022519	4.94	66.833	0.611	98.6	5.4879	5.7238	4.3719	4.1685
CPA4	NM_016352.2	520682	7	129750916	-1.335	0.396392	-4.03	0.00113	0.064011	7.12	84.682	0.8	99.261	8.3096	7.2753	6.6583	6.256
TYW3	NM_138467.1	4010343	1	75003783	-1.333	0.396942	-5.08	0.000144	0.021155	6.41	79.924	0.598	98.514	7.0796	7.069	5.6479	5.8338
LIN7C	NM_018362.2	5700243	11	27474531	-1.333	0.396942	-4.97	0.000178	0.023297	5.56	73.38	0.612	98.611	6.3811	6.0651	4.9653	4.8154
TMEM33	NM_018126.1	6650382	4	41652447	-1.333	0.396942	-4.82	0.000239	0.027429	5.79	75.398	0.635	98.728	6.3889	6.5138	4.8724	5.3648
	BC035081	4890324	1	89834526	-1.333	0.396942	-4.81	0.000242	0.027669	7.5	86.939	0.637	98.744	7.968	8.364	6.9984	6.6668
	BC068274	4880707	2	174599886	-1.333	0.396942	-3.88	0.001528	0.075311	4.07	24.776	0.838	99.361	4.801	4.6678	4.0045	2.7975
PCDH20	NM_022843.2	5900376	13	60882360	-1.333	0.396942	-2.78	0.014392	0.233999	3.13	0.008	1.391	99.86	4.4051	3.1892	3.3734	1.5541
GSTT2	NM_000854.2	7570762	22	22654881	-1.332	0.397217	-4.68	0.000312	0.03112	6.52	80.75	0.656	98.827	7.4618	6.9083	5.9965	5.7101
MED10	NM_032286.2	5720056	5	6425370	-1.331	0.397493	-5.11	0.000139	0.020961	8.25	91.014	0.592	98.463	8.9134	8.9242	7.5406	7.6359
SNORD3C	NR_006881.1	580161	17	19093397	-1.331	0.397493	-4.89	0.000207	0.025571	6.48	80.468	0.621	98.651	7.218	7.0766	6.0195	5.6139
DYRK2	NM_003583.2	2100743	12	66340325	-1.331	0.397493	-4.43	0.000513	0.04124	6.45	80.202	0.701	99.007	6.7638	7.4574	5.5654	5.9936
ATP11C	NM_173694.3	6040204	X	138808842	-1.33	0.397768	-4.77	0.000266	0.029072	6.06	77.464	0.639	98.757	6.4707	6.9741	5.2853	5.5002
FAM83D	NM_030919.2	150543	20	37014583	-1.327	0.398596	-4.26	0.000713	0.049908	8.17	90.57	0.73	99.1	8.7483	8.9145	7.0492	7.96
LOC730107	XM_001721064.1	4900408			-1.326	0.398873	-5.03	0.00016	0.022279	10.03	96.811	0.596	98.49	10.793	10.5906	9.3008	9.43
SHCBP1	NM_024745.3	990025	16	45172542	-1.326	0.398873	-4.98	0.000176	0.023205	4.67	61.786	0.602	98.55	5.3163	5.3428	3.8477	4.1591
MYL9	NM_006097.3	5310437	20	34611451	-1.325	0.399149	-4.37	0.000573	0.044535	6.47	80.382	0.703	99.015	7.4409	6.8245	6.0943	5.5212
RPRD1A	NM_018170.3	2600706	18	33570381	-1.322	0.39998	-3.93	0.001384	0.070754	7.4	86.346	0.805	99.278	7.848	8.2661	6.1964	7.2728
ITPKA	NM_002220.1	6560546	15	39582984	-1.317	0.401369	-4.77	0.000266	0.029072	7.28	85.632	0.621	98.649	7.7001	8.1799	6.5424	6.7038
HIF1AN	NM_017902.2	2070095	10	102299012	-1.317	0.401369	-4.65	0.000334	0.0324	6.33	79.378	0.639	98.759	7.2271	6.7416	5.4846	5.8509
VCAN	NM_004385.2	5910113	5	82912585	-1.315	0.401925	-4.94	0.000191	0.02433	9.11	94.446	0.592	98.467	9.6713	9.8557	8.573	8.3246
LAMB3	NM_000228.2	730040	1	209788561	-1.313	0.402483	-4.64	0.000337	0.032499	6.65	81.633	0.634	98.725	7.4566	7.1478	6.247	5.7322
AQP5	NM_001651.1	2810543	12	48644197	-1.303	0.405283	-4.75	0.000274	0.029457	3.63	1.592	0.604	98.56	4.2838	4.2783	3.2152	2.7403
LONRF3	NM_001031855.1	2450504	X	118035624	-1.302	0.405564	-4.92	0.000197	0.024923	4.74	63.526	0.577	98.351	5.3231	5.4642	3.9802	4.2031
LOC387873	NM_001013636.1	6400689	12	87151042	-1.302	0.405564	-3.75	0.002004	0.087262	3.72	3.311	0.824	99.325	4.4559	4.2783	3.682	2.4481
HCCS	NM_005333.2	2970762	X	11050541	-1.297	0.406972	-4.93	0.000195	0.024785	7.15	84.826	0.569	98.289	7.7396	7.8546	6.4037	6.5958
HNRNPU	NM_031844.2	4250112	1	245013642	-1.297	0.406972	-4.51	0.000436	0.037459	5.66	74.263	0.634	98.721	6.1857	6.4277	4.701	5.3186
KPNA4	NM_002268.3	2850128	3	161700944	-1.295	0.407536	-4.76	0.000268	0.029072	8.62	92.562	0.591	98.457	9.1137	9.4142	7.8122	8.125
CDCA2	NM_152562.2	2940398	8	25365022	-1.295	0.407536	-4.52	0.000431	0.037189	6.63	81.493	0.63	98.7	7.2041	7.3458	5.6617	6.2984
	BU632198	1660524	14	56185313	-1.295	0.407536	-4.17	0.000852	0.054741	3.6	1.194	0.698	98.992	3.9916	4.4951	3.3311	2.5663
RAB27A	NM_183236.1	2680044	15	55496977	-1.294	0.407819	-4.68	0.000313	0.03112	4.42	52.658	0.602	98.548	5.0856	5.0471	4.026	3.5177
LOC100132564	XM_001713808.1	3780767	12	126216410	-1.294	0.407819	-4.13	0.000928	0.057286	9.66	96.005	0.707	99.028	10.3659	10.2469	9.4813	8.5439
FAM64A	NM_019013.1	5870193	17	6294796	-1.289	0.409235	-4.67	0.000319	0.031405	7.36	86.136	0.595	98.482	8.0741	7.9345	6.4762	6.9547
TMSB15A	NM_021992.2	1740291	X	101768868	-1.287	0.409802	-3.94	0.001373	0.070481	8	89.697	0.743	99.132	8.1909	9.0904	7.0624	7.6459
PTP4A1	NM_003463.3	6180414	6	64292519	-1.286	0.410086	-4.54	0.000412	0.036525	7.64	87.773	0.612	98.609	8.5576	8.0071	7.1241	6.8693
CENPM	NM_001002876.1	1450192	22	42334830	-1.285	0.410371	-4.84	0.00023	0.027297	7.35	86.081	0.565	98.26	8.0215	7.9668	6.5655	6.8522
RNF115	NM_014455.2	1090452	1	145688115	-1.283	0.41094	-4.74	0.000279	0.029826	5.54	73.21	0.577	98.349	6.3771	5.9792	4.8508	4.939
CDCP1	NM_022842.3	5260367	3	45125088	-1.282	0.411225	-4.72	0.000289	0.030227	7.65	87.845	0.577	98.355	8.164	8.4209	6.8434	7.1779
LCE1D	NM_178352.2	3400324	1	151037114	-1.281	0.41151	-4.73	0.000286	0.029991	3.61	1.292	0.575	98.336	4.3638	4.1299	3.1349	2.7975
OIP5	NM_007280.1	7000161	15	41601612	-1.281	0.41151	-4.57	0.000391	0.035354	9.37	95.221	0.601	98.537	9.9288	10.0884	8.4541	9.0009
MTFR1	NM_014637.2	6770348	8	66784995	-1.281	0.41151	-4.56	0.000397	0.035636	7.89	89.117	0.603	98.554	8.3302	8.7335	7.0444	7.4566
ANXA5	NM_001154.2	1070451	4	122808996	-1.279	0.412081	-4.91	0.000203	0.025312	10.68	97.944	0.547	98.12	11.2686	11.3613	10.0082	10.0634
RASSF2	NM_170773.1	5390095	20	4708746	-1.278	0.412367	-4.59	0.000372	0.034442	5.57	73.452	0.593	98.469	6.0311	6.3807	5.1314	4.7237
SYNGR3	NM_004209.4	5860609	16	1983745	-1.278	0.412367	-3.73	0.002092	0.089085	4.55	58.593	0.788	99.236	5.1332	5.2513	4.5162	3.3125
SLC10A4	NM_152679.2	540541	4	48185248	-1.277	0.412653	-4.61	0.000363	0.033998	5.71	74.737	0.589	98.448	6.3315	6.3638	4.8107	5.3305
EPHA2	NM_004431.2	6510332	1	16451294	-1.277	0.412653	-4.48	0.000465	0.038846	7.91	89.238	0.61	98.594	8.7798	8.3189	7.489	7.0554
ZNF518B	NM_053042.2	1050132	4	10441812	-1.276	0.412939	-4.83	0.000234	0.027311	7.64	87.783	0.554	98.177	8.1592	8.3997	7.0393	6.9667
OIP5	NM_007280.1	3180484	15	41601928	-1.274	0.413512	-4.51	0.000442	0.03774	7.75	88.37	0.601	98.535	8.1693	8.6027	6.9038	7.3207
MSX1	NM_002448.3	1010333	4	4865147	-1.273	0.413798	-4.09	0.001016	0.060081	11.22	98.584	0.684	98.931	12.3163	11.4074	10.6839	10.4943
KBTBD2	NM_015483.1	4920372	7	32874399	-1.271	0.414372	-4.82	0.000238	0.027375	7.81	88.713	0.547	98.111	8.3324	8.56	7.1894	7.1612
TMED7	NM_181836.3	60037	5	114978001	-1.27	0.41466	-4.49	0.000458	0.038591	8.03	89.907	0.598	98.512	8.3721	8.9665	7.4561	7.3429
GPR180	NM_180989.4	3180563	13	94079051	-1.27	0.41466	-4.46	0.000485	0.039804	6.79	82.643	0.603	98.558	7.1271	7.7253	6.2545	6.0585
RBM24	NM_153020.1	1740594	6	17401884	-1.269	0.414947	-4.32	0.000641	0.047132	4.54	58.078	0.629	98.692	5.1796	5.1662	4.2752	3.5322
KLHL2	NM_007246.2	1070593	4	166463343	-1.268	0.415235	-4.3	0.000667	0.047995	7	83.968	0.632	98.708	7.2869	7.9899	6.2308	6.5094
LPAR5	NM_020400.4	2260241	12	6598385	-1.267	0.415523	-4.36	0.000589	0.04509	5.82	75.694	0.618	98.643	6.1277	6.7845	5.0638	5.3142
ZAK	NM_016653.2	3360431	2	173790175	-1.267	0.415523	-4.32	0.000642	0.047132	5.62	73.979	0.625	98.668	6.1277	6.3836	4.6439	5.3342
TBL1XR1	NM_024665.3	540082	3	178222096	-1.264	0.416388	-4.76	0.000268	0.029072	5.81	75.594	0.547	98.109	6.3094	6.5788	5.2343	5.1251
MELK	NM_014791.2	160097	9	36641807	-1.264	0.416388	-4.28	0.000687	0.04872	8.71	92.939	0.628	98.683	9.0646	9.6092	7.8097	8.3355
IRF2BP2	NM_182972.2	6660768	1	234743250	-1.263	0.416677	-4.77	0.000266	0.029072	5.83	75.762	0.545	98.094	6.5785	6.3497	5.1208	5.2809
SNRPD1	NM_006938.2	1510039	18	17463809	-1.263	0.416677	-4.71	0.000294	0.030497	7.08	84.436	0.553	98.164	7.5413	7.8928	6.4413	6.4661
KLF11	XM_001129527.1	5700088			-1.259	0.417833	-4.58	0.000383	0.035029	6.09	77.739	0.567	98.272	6.4804	6.9635	5.4785	5.448
LOC647946	XM_943585.1	4830215			-1.258	0.418123	-4.83	0.000234	0.027311	4.88	66.082	0.528	97.953	5.522	5.5011	4.2856	4.2216
DEGS1	NM_003676.2	5220632	1	222447679	-1.257	0.418413	-4.58	0.000381	0.034886	8.72	92.986	0.564	98.243	9.3735	9.3171	7.8539	8.3236
FAM3C	NM_001040020.1	1260767	7	120989763	-1.256	0.418703	-4.53	0.000421	0.036848	7.43	86.551	0.571	98.302	7.9877	8.1231	6.5474	7.0512
MGC40489	XR_016048.1	4670605	17	60180593	-1.254	0.419284	-4.8	0.000251	0.028204	7.61	87.614	0.527	97.946	8.2082	8.261	7.0486	6.9132
H2AFV	NM_138635.3	3460193	7	44869612	-1.252	0.419866	-4.57	0.00039	0.035325	5.54	73.208	0.56	98.226	6.1132	6.2121	5.1396	4.6809
PDLIM3	NM_014476.1	770463	4	186660434	-1.25	0.420448	-4.61	0.000358	0.033771	5.7	74.61	0.55	98.137	6.344	6.2975	4.8643	5.2765
E2F2	NM_004091.2	5340338	1	23832967	-1.25	0.420448	-4.17	0.000856	0.054741	7.86	88.935	0.629	98.689	8.3078	8.6529	6.8666	7.5944
KLHL8	NM_020803.3	2000019	4	88301892	-1.248	0.421031	-4.74	0.000282	0.029833	6.98	83.782	0.528	97.955	7.6901	7.5112	6.2776	6.4277
SCHIP1	NM_014575.2	630465	3	159609932	-1.248	0.421031	-4.62	0.000351	0.033655	6.4	79.842	0.544	98.086	7.2058	6.8347	5.8353	5.7101
ACBD7	XM_928013.1	630678	10	15157561	-1.247	0.421323	-4.31	0.000653	0.047558	5.86	75.986	0.598	98.505	6.1857	6.7845	5.0675	5.4085
SCML1	NM_001037540.1	1430152	X	17682478	-1.245	0.421908	-4.49	0.000454	0.038479	6.45	80.269	0.561	98.232	6.955	7.1962	6.0606	5.6011
GLRX	NM_002064.1	4590228	5	95175728	-1.245	0.421908	-4.43	0.000511	0.041149	9.38	95.245	0.572	98.31	10.2394	9.7618	8.5957	8.9158
NETO2	NM_018092.3	1580161	16	47115854	-1.245	0.421908	-4.14	0.00092	0.057055	5.51	72.933	0.629	98.698	5.7392	6.5208	4.758	5.0118
SPRY4	NM_030964.2	730576	5	141670570	-1.244	0.4222	-4.78	0.000261	0.028832	7.83	88.81	0.516	97.836	8.4199	8.474	7.1779	7.2288
SUSD2	NM_019601.3	110592	22	22915000	-1.243	0.422493	-4.69	0.000306	0.030926	5.44	72.323	0.528	97.948	6.1526	5.974	4.9241	4.7164
CDV3	NM_017548.3	5720746	3	134791187	-1.243	0.422493	-4.37	0.000572	0.044535	9.27	94.916	0.58	98.374	10.1988	9.5797	8.62	8.672
SUMO3	NM_006936.2	5900682	21	46225734	-1.242	0.422786	-4.22	0.000778	0.052172	8.62	92.59	0.607	98.577	8.906	9.5857	7.8496	8.1582
TPX2	NM_012112.4	6290358	20	29852491	-1.241	0.423079	-4.37	0.000574	0.044535	8.47	91.978	0.576	98.34	9.0022	9.1738	7.5528	8.1421
CHRNB1	NM_000747.2	7650639	17	7301385	-1.241	0.423079	-4.29	0.000679	0.048426	6.63	81.51	0.592	98.465	7.3978	7.102	6.3191	5.6993
C6orf211	NM_024573.1	3710465	6	151790834	-1.24	0.423373	-4.73	0.000283	0.029833	5.76	75.192	0.517	97.849	6.3301	6.4239	5.0675	5.2071
NUFIP2	NM_020772.1	4890133	17	24613385	-1.24	0.423373	-4.42	0.00052	0.04163	5.87	76.045	0.567	98.27	6.3174	6.6621	5.4757	5.0232
TMEM158	NM_015444.2	3130220	3	45266007	-1.239	0.423666	-4.7	0.0003	0.030717	7.89	89.128	0.52	97.872	8.6262	8.4	7.2862	7.2619
C6orf211	NM_024573.1	2750129	6	151790288	-1.237	0.424254	-4.49	0.000455	0.038479	5.71	74.784	0.55	98.147	6.1418	6.5208	4.9374	5.2512
KLHL8	NM_020803.3	7100349	4	88301248	-1.234	0.425137	-4.69	0.000305	0.030926	7.6	87.563	0.514	97.819	8.2952	8.1365	6.9173	7.0472
COMMD8	NM_017845.2	650148	4	47147917	-1.234	0.425137	-3.98	0.001266	0.067694	5.25	70.494	0.649	98.795	5.8169	5.9262	4.1812	5.093
TNFAIP8L1	NM_152362.1	6200187	19	4604837	-1.233	0.425432	-4.27	0.000705	0.049508	5.65	74.229	0.583	98.397	6.1059	6.4309	4.7374	5.3342
GLI2	NM_005270.3	5290427	2	121465002	-1.233	0.425432	-4.03	0.001129	0.064011	4.59	59.7	0.634	98.719	5.0553	5.3562	3.5633	4.3812
IL15	NM_172174.1	1470091	4	142796806	-1.232	0.425727	-4.62	0.000354	0.033684	4.13	30.925	0.523	97.895	4.6809	4.815	3.6629	3.3688
LOC647346	XM_936495.2	4860066			-1.231	0.426022	-4.53	0.000419	0.036848	7.49	86.905	0.536	98.027	8.0727	8.1411	6.6652	7.0859
MAP1B	NM_032010.1	2710524	5	71537930	-1.23	0.426317	-4.63	0.000344	0.033026	5	67.665	0.518	97.862	5.4806	5.7588	4.3505	4.4291
ATP1B1	NM_001677.3	6060482	1	167367929	-1.229	0.426613	-4.7	0.000303	0.030797	7.06	84.307	0.507	97.758	7.6516	7.7011	6.3739	6.5208
LOC641746	XR_036993.1	7510148	7	63380946	-1.228	0.426909	-4.56	0.000397	0.035636	6.98	83.833	0.527	97.936	7.6051	7.5897	6.1801	6.5587
TNPO1	NM_153188.2	2470020	5	72208738	-1.228	0.426909	-4.22	0.000785	0.052459	6.53	80.835	0.587	98.431	6.9057	7.3855	6.1801	5.6549
SCARNA11	NR_003012.1	5310066	12	6690681	-1.227	0.427205	-3.12	0.007225	0.171482	6.04	77.324	0.928	99.526	7.1612	6.1414	6.0407	4.8087
C13orf15	NM_014059.2	160242	13	40942702	-1.226	0.427501	-4.64	0.000342	0.032936	5.3	70.888	0.513	97.804	5.7819	6.044	4.6845	4.6892
OSMR	NM_003999.1	3370632	5	38969508	-1.225	0.427798	-4.41	0.000538	0.042725	5.01	67.722	0.547	98.114	5.3656	5.877	4.4706	4.3227
LDHA	NM_005566.3	6520386	11	18429687	-1.222	0.428688	-4.46	0.000479	0.03952	6.34	79.511	0.534	98.008	6.8416	7.0705	5.9355	5.5324
LOC390466	XM_372521.1	3710471	14	34459695	-1.221	0.428985	-4.6	0.000366	0.034131	8.26	91.05	0.511	97.79	8.9637	8.7822	7.5389	7.7642
CYP4F22	NM_173483.2	1780279			-1.221	0.428985	-4.23	0.000762	0.051611	5.41	72.016	0.574	98.327	6.2759	5.7707	4.5754	5.0288
HINT3	NM_138571.4	2140279	6	126301042	-1.22	0.429283	-2.65	0.018565	0.259575	6.34	79.473	1.204	99.805	7.8352	6.0651	6.2577	5.2024
LRP8	NM_001018054.1	2850403	1	53711604	-1.218	0.429878	-4.33	0.000622	0.046544	5.37	71.567	0.55	98.139	6.264	5.6863	4.7505	4.7643
TOR1B	NM_014506.1	6180056	9	131613002	-1.216	0.430475	-4.67	0.000323	0.031549	6.12	77.957	0.494	97.627	6.7728	6.6809	5.5161	5.5057
VAPA	NM_003574.4	7200368	18	9934985	-1.213	0.431371	-4.52	0.000426	0.037029	4.73	63.2	0.511	97.787	5.1796	5.4883	4.2067	4.0355
C12orf57	NM_138425.2	3130291	12	6923970	-1.212	0.43167	-4.55	0.000405	0.036088	10.94	98.302	0.506	97.745	11.6477	11.4376	10.2161	10.4459
ATP8B2	NM_020452.2	6960168	1	152590047	-1.211	0.431969	-4.37	0.000579	0.044608	6.25	78.885	0.534	98.012	6.9762	6.7446	5.4159	5.8826
TOP2A	NM_001067.2	3990619	17	38545066	-1.21	0.432269	-4.27	0.000702	0.049337	8.52	92.211	0.549	98.133	8.9168	9.338	7.6987	8.1367
	CR603272	4830014	3	197681269	-1.207	0.433168	-4.24	0.000754	0.051436	6.55	80.953	0.552	98.16	6.8799	7.4272	5.789	6.1039
DUSP4	NM_001394.5	2650041	8	29263496	-1.205	0.433769	-4.14	0.000918	0.057054	5.65	74.167	0.569	98.281	5.8932	6.6049	5.0465	5.041
NAMPT	NM_005746.2	2230379	7	105893542	-1.204	0.43407	-4.44	0.000508	0.040979	6.76	82.41	0.512	97.802	7.1484	7.5689	6.148	6.1621
	CR627122	4070193	X	131333820	-1.203	0.434371	-4.16	0.00087	0.055399	4.94	66.861	0.56	98.228	5.4474	5.636	4.0111	4.6664
CDCP1	NM_178181.1	150463	3	45153802	-1.2	0.435275	-4.61	0.000358	0.033771	5.41	71.968	0.481	97.466	6.0189	5.9991	4.7818	4.8353
PMP22	NM_153321.1	7560138	17	15133244	-1.2	0.435275	-4.56	0.000394	0.035541	8.86	93.57	0.488	97.552	9.3596	9.5523	8.2068	8.3042
NUFIP2	NM_020772.1	5690113	17	24612861	-1.2	0.435275	-4.51	0.000434	0.03744	7.13	84.739	0.495	97.639	7.6051	7.8655	6.609	6.4616
CDA	NM_001785.2	5090372	1	20817790	-1.2	0.435275	-4.5	0.000446	0.037905	6	77.049	0.497	97.66	6.454	6.7488	5.3388	5.4636
LOC642178	XM_936332.1	70398			-1.2	0.435275	-3.72	0.002112	0.089543	3.68	2.392	0.656	98.833	4.4051	4.1476	2.5781	3.5755
CAMK2N1	NM_018584.5	4060008	1	20810122	-1.199	0.435577	-4.33	0.000626	0.046689	7.38	86.255	0.524	97.906	7.9853	7.9748	6.5228	7.0392
LOC100216001	NR_024475.1	4830019	10	4692635	-1.198	0.435879	-4.52	0.000429	0.037165	4.93	66.687	0.492	97.601	5.6626	5.3884	4.3552	4.2992
UCRC	NM_013387.3	7550768	22	28496236	-1.198	0.435879	-4.42	0.000526	0.042003	6.69	81.936	0.507	97.754	7.0832	7.4981	6.0822	6.1039
41519	NM_001008491.1	5960703	2	241941730	-1.198	0.435879	-3.93	0.001381	0.070743	10.23	97.214	0.601	98.539	10.9658	10.703	9.2279	10.0451
ITGB5	NM_002213.3	2490411	3	125964752	-1.197	0.436181	-4.6	0.000368	0.03423	8.96	93.928	0.478	97.438	9.5222	9.5875	8.3553	8.3603
SYPL1	NM_006754.2	3170360	7	105732278	-1.197	0.436181	-4.47	0.000476	0.039391	8.63	92.628	0.499	97.671	9.0864	9.3738	8.1345	7.9311
CAMTA1	NM_015215.1	3930411	1	7735180	-1.196	0.436484	-4.59	0.000375	0.034565	6.56	81.057	0.478	97.421	7.146	7.1787	6.0069	5.9264
RSU1	NM_012425.3	6110209	10	16673664	-1.195	0.436786	-4.26	0.000723	0.050387	6.9	83.286	0.531	97.974	7.7797	7.2103	6.3329	6.2671
EGR1	NM_001964.2	870338	5	137804532	-1.195	0.436786	-4.19	0.000832	0.053994	8.33	91.417	0.544	98.088	8.6677	9.1966	7.5574	7.9161
ITGB5	NM_002213.3	2650114	3	125964619	-1.194	0.437089	-4.57	0.00039	0.035325	9.17	94.618	0.478	97.423	9.831	9.7037	8.5941	8.5536
SGK1	NM_005627.3	2030324	6	134490933	-1.194	0.437089	-4.08	0.001036	0.060663	6.65	81.635	0.564	98.245	7.5184	6.9679	6.2886	5.8102
GAS6	NM_000820.1	4280632	13	113590188	-1.192	0.437696	-4.51	0.000435	0.037459	8.13	90.394	0.485	97.521	8.6897	8.7696	7.4166	7.6579
TAGLN2	NM_003564.1	4070736	1	159888204	-1.191	0.437999	-4.34	0.000612	0.046137	8.91	93.769	0.511	97.783	9.5254	9.4849	8.0772	8.5509
FAIM3	NM_005449.3	5270520	1	205144550	-1.191	0.437999	-4.24	0.000755	0.051436	4.12	30.201	0.529	97.959	4.5219	4.9187	3.3176	3.7409
TOR1AIP1	NM_015602.2	6290524	1	178155487	-1.191	0.437999	-4.23	0.000765	0.051736	8.19	90.705	0.531	97.976	8.7159	8.8631	7.3134	7.8826
UBFD1	NM_019116.2	1090347	16	23489428	-1.189	0.438607	-4.54	0.000415	0.036549	6.84	82.931	0.476	97.402	7.4967	7.371	6.1849	6.305
	AL137257	4180612	1	160765587	-1.189	0.438607	-4.36	0.000588	0.045073	9.57	95.765	0.504	97.73	9.9792	10.3493	8.8536	9.0973
GOLPH4	NM_014498.2	6100168	3	169210714	-1.189	0.438607	-4.19	0.000821	0.053483	5.7	74.669	0.533	98.001	6.206	6.3868	4.8154	5.3999
CDKN1B	NM_004064.2	130309	12	12765845	-1.185	0.439825	-3.95	0.001329	0.069174	6.48	80.464	0.578	98.357	6.7717	7.377	5.6204	6.1575
SUMO2	NM_001005849.1	2600066	17	73178914	-1.185	0.439825	-3.45	0.003684	0.122627	10.26	97.267	0.715	99.058	10.7769	10.9257	9.0619	10.2699
AK3L1	NM_013410.2	160148	1	65465577	-1.184	0.44013	-4.43	0.000515	0.041335	8.2	90.731	0.486	97.533	8.7364	8.8503	7.7683	7.4502
41528	NM_018243.2	20288	4	77959648	-1.183	0.440435	-4.52	0.00043	0.037165	8.36	91.537	0.471	97.324	8.8767	9.0232	7.7357	7.7987
IFNGR2	NM_005534.2	2570291	21	33731481	-1.182	0.44074	-4.49	0.000457	0.038579	9.38	95.247	0.474	97.383	9.8571	10.0827	8.7873	8.7883
FAM3C	NM_001040020.1	780332	7	120989761	-1.182	0.44074	-4.2	0.000815	0.053483	7.21	85.164	0.524	97.904	7.6699	7.9325	6.3557	6.8818
BMF	NM_033503.3	110280	15	40380330	-1.181	0.441046	-4.48	0.000461	0.038662	4.51	57.079	0.474	97.379	5.2076	4.9984	3.8734	3.9696
EPDR1	NM_017549.3	6400044	7	37957726	-1.181	0.441046	-4.44	0.000501	0.040694	7.46	86.75	0.48	97.449	8.1356	7.9629	6.7467	6.9905
YRDC	NM_024640.3	6450475	1	38269137	-1.179	0.441658	-3.88	0.001538	0.075754	8.73	93.066	0.584	98.406	9.7027	8.945	8.339	7.9507
NRP1	NM_003873.4	5720424	10	33507128	-1.178	0.441964	-4.39	0.000552	0.043529	5.85	75.889	0.483	97.514	6.4073	6.4698	5.4348	5.0871
RBMS1	NM_002897.3	2470520	2	160839018	-1.178	0.441964	-4.35	0.000606	0.045833	6.18	78.421	0.492	97.597	6.5849	6.9571	5.6853	5.5002
FAM46B	NM_052943.2	4180324	1	27204252	-1.173	0.443498	-4.5	0.000446	0.037905	6.5	80.583	0.46	97.169	7.0387	7.1268	5.9337	5.8853
RSL24D1	NM_016304.2	3420451	15	55473613	-1.173	0.443498	-4.2	0.000803	0.053091	10.33	97.396	0.509	97.766	10.6471	11.1787	9.8061	9.6737
MGC39900	NM_194324.1	70270	X	103103903	-1.173	0.443498	-3.96	0.001304	0.06898	6.91	83.352	0.557	98.211	7.154	7.8378	6.148	6.497
ZFR	NM_016107.3	6060215	5	32403320	-1.172	0.443806	-4.48	0.000469	0.039145	8.71	92.954	0.463	97.201	9.2087	9.3779	8.1063	8.1358
LOC401068	XM_379194.3	5080296	3	53055428	-1.172	0.443806	-4.24	0.000742	0.050981	3.61	1.306	0.5	97.69	4.2571	4.1299	2.7776	3.2652
B4GALT5	NM_004776.2	2060047	20	47683153	-1.171	0.444113	-4.47	0.000477	0.039391	9.9	96.579	0.463	97.207	10.3989	10.5826	9.3101	9.3286
MCM4	NM_182746.1	2630711	8	48890001	-1.171	0.444113	-4.06	0.001067	0.061922	6.25	78.84	0.533	98.006	6.7858	6.8809	5.3275	5.9963
RREB1	NM_002955.4	2640097	6	7084478	-1.171	0.444113	-2.87	0.011922	0.216413	3.52	0.593	0.941	99.541	3.9409	4.2634	2.0942	3.7677
NKX6-1	NM_006168.1	5890035	4	85633516	-1.17	0.444421	-4.33	0.000628	0.046694	3.55	0.758	0.483	97.512	4.3202	3.9409	2.8968	3.0245
PRKAG2	NM_024429.1	1050196	7	151254201	-1.17	0.444421	-4.29	0.000676	0.048367	7.36	86.183	0.489	97.565	7.9696	7.929	6.5578	7.0009
ARL5B	NM_178815.3	1710753	10	18966787	-1.17	0.444421	-4.12	0.00095	0.057796	5.86	75.992	0.52	97.868	6.1393	6.7557	5.2989	5.2562
RBM12	NM_006047.4	2850438	20	34240511	-1.169	0.444729	-4.39	0.000552	0.043529	7.84	88.889	0.471	97.343	8.5821	8.2759	7.2644	7.2556
FOXM1	NM_021953.2	540053	12	2967158	-1.169	0.444729	-4.38	0.000564	0.044228	6.94	83.515	0.473	97.366	7.6569	7.3838	6.2658	6.4371
PREPL	NM_006036.3	5310204	2	44546557	-1.169	0.444729	-3.84	0.001652	0.078402	6.03	77.301	0.576	98.346	6.2397	6.9965	5.2532	5.6456
C1orf19	NM_052965.1	3870112	1	182309649	-1.167	0.445346	-4.38	0.000566	0.044339	6.89	83.229	0.471	97.328	7.3153	7.6298	6.3169	6.294
CYP11B2	NM_000498.3	2060114	8	143993026	-1.167	0.445346	-3.4	0.00408	0.127637	3.59	1.169	0.7	99.001	4.1877	4.1652	3.6165	2.4019
RPS6KB1	NM_003161.2	1940576	17	55382430	-1.165	0.445964	-4.47	0.000474	0.039316	8.71	92.95	0.453	97.076	9.265	9.313	8.1614	8.0874
MTRF1L	NM_019041.3	5550564	6	153351471	-1.164	0.446273	-4.44	0.000501	0.040694	8.26	91.025	0.457	97.118	8.793	8.8812	7.597	7.7495
SC65	NM_006455.2	6760673	17	39958394	-1.164	0.446273	-4.35	0.000605	0.045833	7.34	86.024	0.471	97.345	7.9995	7.8506	6.6058	6.917
FAM26A	NM_182494.1	6180450	10	105222692	-1.164	0.446273	-4.31	0.000653	0.047558	5.37	71.557	0.478	97.428	5.9434	5.9524	4.9828	4.5852
LOC100128163	XM_001722350.1	6040576	18	54488312	-1.163	0.446583	-4.44	0.000508	0.040979	5.18	69.706	0.457	97.121	5.82	5.7014	4.669	4.526
STARD7	NM_139267.1	5720360	2	96214964	-1.162	0.446893	-4.46	0.000484	0.039768	8.96	93.919	0.452	97.055	9.5869	9.4866	8.3707	8.378
ITGB5	NM_002213.3	5360243	3	125965004	-1.159	0.447823	-4.33	0.000623	0.046576	6.11	77.839	0.467	97.26	6.515	6.8536	5.5411	5.5103
CDCA5	NM_080668.2	1400673	11	64601683	-1.159	0.447823	-4.13	0.000934	0.057372	9.61	95.867	0.503	97.713	10.0467	10.3338	8.7822	9.2797
MRPL35	NM_016622.2	5340100	2	86293273	-1.159	0.447823	-3.87	0.001573	0.076906	7	83.909	0.555	98.19	7.2764	7.8728	6.1463	6.6858
TMEM144	NM_018342.3	1340026	4	159395657	-1.158	0.448133	-4.27	0.000701	0.049323	6.5	80.659	0.476	97.398	6.971	7.1979	5.7531	6.0997
OSBPL10	NM_017784.3	6760593	3	31718961	-1.158	0.448133	-4.22	0.000785	0.052459	6.76	82.423	0.486	97.527	7.1183	7.5561	6.0791	6.2788
MYH15	XM_938225.1	50494			-1.157	0.448444	-4.35	0.000601	0.045744	5.31	71.011	0.461	97.18	5.9951	5.7841	4.6238	4.8416
PDLIM1	NM_020992.2	1410010	10	97013625	-1.157	0.448444	-3.92	0.001414	0.071576	7.72	88.26	0.541	98.069	8.2494	8.3531	6.7706	7.518
ACAP2	NM_012287.4	4280026	3	194996609	-1.156	0.448755	-4.11	0.000964	0.058288	5.83	75.709	0.501	97.692	6.1557	6.6497	5.0984	5.3958
TRIM47	NM_033452.2	840528	17	73870441	-1.156	0.448755	-4.05	0.001089	0.062682	7.12	84.608	0.512	97.8	7.6873	7.6981	6.2196	6.8544
LOC730358	XM_001131842.1	610068			-1.156	0.448755	-3.97	0.001296	0.068631	5.6	73.75	0.531	97.978	6.2469	6.1045	4.669	5.3697
F2RL1	NM_005242.3	1050068	5	76166727	-1.153	0.449689	-4.15	0.000894	0.056387	8.28	91.15	0.49	97.578	8.6177	9.1021	7.5976	7.8154
MAD2L1	NM_002358.2	870546	4	121200789	-1.153	0.449689	-3.66	0.002422	0.097365	9.64	95.939	0.598	98.509	9.9574	10.47	8.6517	9.4703
TMEM56	NM_152487.1	540647	1	95431171	-1.152	0.450001	-3.98	0.00127	0.067694	4.74	63.473	0.522	97.885	5.008	5.6227	4.0045	4.3227
LOC100130902	XM_001725871.1	6940192			-1.152	0.450001	-2.81	0.013525	0.227322	3.51	0.531	0.936	99.534	4.2838	3.8824	2.0942	3.7677
FOXN2	NM_002158.3	6020612	2	48459743	-1.15	0.450625	-4.01	0.001179	0.06535	7.36	86.151	0.512	97.792	7.6294	8.2433	6.6766	6.8966
PLA2G3	NM_015715.3	50626	22	31530905	-1.15	0.450625	-3.85	0.001635	0.078008	6.47	80.356	0.547	98.116	6.8668	7.2156	5.5321	6.2494
HJURP	NM_018410.3	3180367	2	234749271	-1.149	0.450938	-4.31	0.000653	0.047558	7.32	85.91	0.457	97.127	7.9803	7.8167	6.612	6.8872
TMEM136	NM_174926.1	1110228	11	119706365	-1.149	0.450938	-4.29	0.000677	0.048367	6.73	82.183	0.46	97.165	7.376	7.2288	5.9953	6.3113
TM2D2	NM_078473.2	110711	8	38965720	-1.149	0.450938	-4.2	0.000815	0.053483	6.14	78.116	0.476	97.404	6.7664	6.6638	5.3388	5.7927
KPNA2	NM_002266.2	6250609	17	63473387	-1.147	0.451563	-4.3	0.000668	0.047995	7.58	87.426	0.456	97.112	8.2804	8.023	7.1053	6.9044
SLC12A2	NM_001046.2	830022	5	127522672	-1.146	0.451876	-4.33	0.000621	0.046544	5.96	76.784	0.449	96.994	6.4073	6.6658	5.3906	5.3915
KRT8	NM_002273.2	3370056	12	51577384	-1.145	0.45219	-3.78	0.001884	0.084259	10.36	97.449	0.555	98.186	11.2002	10.6589	9.4628	10.1066
PXN	NM_002859.1	6450541	12	119132960	-1.144	0.452503	-4.28	0.000695	0.049124	6.17	78.349	0.456	97.11	6.8714	6.6111	5.7074	5.4866
BHLHB9	NM_030639.1	7210546	X	101893766	-1.144	0.452503	-3.8	0.001805	0.082593	5.18	69.753	0.549	98.13	5.6897	5.8224	4.2067	5.0172
	DB304963	4200528	3	122625850	-1.144	0.452503	-3.25	0.005552	0.150245	4.01	19.881	0.712	99.035	4.7107	4.4609	2.8107	4.0732
CEP55	NM_018131.3	7510709	10	95278458	-1.143	0.452817	-4.02	0.001163	0.064747	8.15	90.472	0.5	97.688	8.4557	8.9926	7.4227	7.7399
SPAST	NM_199436.1	460333	2	32236050	-1.143	0.452817	-3.8	0.001819	0.082832	5.55	73.293	0.548	98.126	5.769	6.4719	5.1901	4.7643
LOC100134322	XR_037416.1	5810717			-1.142	0.453131	-4.35	0.000605	0.045833	4.99	67.445	0.442	96.877	5.4745	5.6416	4.3552	4.4765
RNU6-1	NR_004394.1	3610279	15	68132295	-1.141	0.453445	-4.37	0.000575	0.044535	9.98	96.71	0.437	96.788	10.5434	10.5648	9.4745	9.3511
LOC653066	XM_930921.1	6200113	2	138136	-1.141	0.453445	-4.36	0.000584	0.044822	5.61	73.901	0.437	96.805	6.2241	6.1458	4.9828	5.1052
FLJ10996	NM_019044.2	2850392	2	118393811	-1.141	0.453445	-4.15	0.000886	0.05612	4.93	66.71	0.472	97.358	5.2603	5.7372	4.3829	4.3321
SNORD18B	NR_002442.1	4290373	15	66794370	-1.141	0.453445	-3.54	0.003039	0.110508	3.85	8.327	0.611	98.598	4.4473	4.3983	3.7954	2.7674
RSRC1	NM_016625.2	6760730	3	158261224	-1.139	0.454074	-4.38	0.000568	0.044382	7.4	86.348	0.433	96.708	7.9501	7.9817	6.8105	6.843
C1orf212	NM_138428.3	7040411	1	35091762	-1.138	0.454389	-4.29	0.000675	0.048353	6.47	80.352	0.445	96.93	7.1292	6.9398	5.7934	6.0001
BCL3	NM_005178.2	6330725	19	49954947	-1.137	0.454704	-4.3	0.000666	0.047995	6.6	81.303	0.443	96.888	7.2512	7.0879	5.9287	6.1363
FBXO30	NM_032145.4	5290307	6	146161256	-1.137	0.454704	-4.21	0.000789	0.052594	6.05	77.398	0.457	97.123	6.7908	6.4449	5.5735	5.3877
CDKN1B	NM_004064.2	1030348	12	12766376	-1.136	0.455019	-3.99	0.001225	0.066875	6.97	83.712	0.495	97.648	7.2383	7.8321	6.4973	6.3007
FOXA1	NM_004496.2	830056	14	38059458	-1.134	0.455651	-4.22	0.000772	0.051852	5.81	75.609	0.451	97.023	6.2721	6.4884	5.1009	5.3915
ITGB6	NM_000888.3	650437	2	160958325	-1.134	0.455651	-2.71	0.016315	0.247449	3.23	0.025	0.954	99.564	4.1588	3.4452	1.8554	3.4798
ARL5B	NM_178815.3	2340564	10	18966366	-1.132	0.456283	-3.98	0.001259	0.067623	5.54	73.268	0.492	97.599	5.8054	6.4162	4.9173	5.041
FLNC	NM_001458.3	580491	7	128286512	-1.131	0.456599	-3.08	0.007713	0.175309	5.56	73.369	0.752	99.159	5.522	6.7201	4.6292	5.3515
LOC644743	XR_016703.1	20044	1	44341805	-1.13	0.456916	-4.22	0.000771	0.051852	10.64	97.9	0.445	96.936	11.2827	11.1283	9.9242	10.2269
OR5H14	NM_001005514.1	6400544	3	97868913	-1.13	0.456916	-3.91	0.001457	0.073064	3.74	3.947	0.504	97.735	4.0811	4.5275	2.9131	3.435
CDCA8	NM_018101.2	4830634	1	37947578	-1.127	0.457867	-4.18	0.000837	0.054102	7.27	85.571	0.447	96.974	7.7917	7.8821	6.5256	6.895
GPC4	NM_001448.2	6330270	X	132435446	-1.127	0.457867	-4.08	0.001028	0.060521	6.17	78.381	0.465	97.243	6.5016	6.976	5.696	5.5282
LOC644563	XR_018203.2	4290102			-1.127	0.457867	-3.96	0.001312	0.069139	8.7	92.928	0.488	97.557	9.5703	8.9615	8.0659	8.2127
SMAD7	NM_005904.2	3890709	18	46446633	-1.127	0.457867	-3.77	0.001914	0.084975	4.43	53.469	0.53	97.965	4.601	5.3932	3.8208	3.9187
TUBB2C	NM_006088.5	2070368	9	139257564	-1.126	0.458184	-3.99	0.001229	0.066875	10.29	97.326	0.481	97.47	10.9595	10.7401	9.4488	9.9989
NUP155	NM_153485.1	5050452	5	37406689	-1.125	0.458502	-3.82	0.001748	0.081202	4.08	26.044	0.516	97.83	4.7663	4.5203	3.8734	3.1632
ANG	NM_001097577.1	3930392	14	20232018	-1.124	0.45882	-4.27	0.000708	0.049604	7.69	88.097	0.429	96.642	8.3593	8.152	7.1761	7.0878
ZNF364	NM_014455.1	7380382	1	144399891	-1.124	0.45882	-4.17	0.000854	0.054741	7.16	84.908	0.446	96.953	7.8132	7.6399	6.4317	6.7725
LOC652046	XM_941361.1	3290064			-1.124	0.45882	-3.32	0.004743	0.139734	4.32	46.749	0.65	98.8	5.3711	4.3983	4.086	3.435
PRDM4	NM_012406.3	20243	12	108126735	-1.123	0.459138	-4.25	0.000733	0.050794	8.33	91.404	0.431	96.67	8.9254	8.8604	7.6479	7.8924
GTF3C6	NM_138408.2	4200110	6	111386701	-1.123	0.459138	-4.13	0.000923	0.057114	7.85	88.918	0.451	97.027	8.5559	8.2686	7.1322	7.4461
NAMPT	NM_005746.2	3060523	7	105925277	-1.122	0.459456	-4.23	0.000768	0.051848	5.83	75.711	0.433	96.72	6.4013	6.3717	5.1208	5.4085
TSPAN4	NM_001025238.1	540619	11	855736	-1.122	0.459456	-4.09	0.001003	0.059672	5.57	73.494	0.457	97.129	5.9694	6.2923	4.8361	5.1808
UPP1	NM_003364.2	7570673	7	48114453	-1.121	0.459775	-4.24	0.000754	0.051436	7.99	89.687	0.431	96.676	8.4638	8.6462	7.5325	7.3352
TROVE2	NM_001042369.1	4810390	1	191318407	-1.12	0.460094	-4.24	0.000755	0.051436	8.44	91.882	0.429	96.648	8.9844	9.0198	8.0114	7.7528
C11orf46	NM_152316.1	3840736	11	30315422	-1.118	0.460732	-4.13	0.00093	0.057319	6.71	82.056	0.444	96.928	7.072	7.4699	6.1088	6.1968
KLHL5	NM_001007075.1	1410161	4	38799958	-1.118	0.460732	-4.07	0.001046	0.061121	7.41	86.435	0.455	97.106	7.8389	8.0959	6.6467	7.0512
PDE9A	NM_001001584.1	50678	21	43017763	-1.118	0.460732	-3.88	0.001525	0.075248	3.61	1.317	0.491	97.582	4.3452	3.9886	3.3311	2.7674
CDCA4	NM_145701.1	6520528	14	104547745	-1.116	0.461371	-4.03	0.001136	0.064011	5.33	71.227	0.46	97.157	5.9853	5.7938	5.0129	4.5339
SLC17A4	NM_005495.1	3310474	6	25888048	-1.115	0.461691	-4.18	0.000836	0.054072	4.21	37.482	0.431	96.663	4.7943	4.732	3.8026	3.4943
SMAD3	NM_005902.3	6840328	15	65274286	-1.114	0.462011	-4.25	0.000739	0.050905	8.04	89.911	0.42	96.473	8.6337	8.5504	7.3903	7.5652
SH3BGRL2	NM_031469.2	7200044	6	80413030	-1.114	0.462011	-4.19	0.000819	0.053483	6.77	82.499	0.428	96.612	7.2223	7.4285	6.1054	6.3169
MRS2	NM_020662.2	6480440	6	24423870	-1.113	0.462332	-4.11	0.000974	0.058647	6.96	83.663	0.442	96.873	7.3117	7.7188	6.4413	6.3623
SYDE1	NM_033025.4	2370348	19	15086624	-1.113	0.462332	-3.48	0.003469	0.119151	5.94	76.636	0.583	98.401	6.9835	6.0109	5.2463	5.5212
MMD	NM_012329.2	5550431	17	53470363	-1.113	0.462332	-2.58	0.021379	0.275056	7.43	86.572	0.994	99.629	7.0892	8.8871	6.6229	7.1283
CLINT1	NM_014666.2	7040280	5	157214041	-1.112	0.462652	-3.87	0.001565	0.076694	8.76	93.163	0.485	97.525	9.058	9.5639	7.9853	8.412
	XM_376160	6180373			-1.111	0.462973	-4.2	0.000815	0.053483	4.51	56.819	0.423	96.507	5.1438	4.9782	4.0559	3.8443
KLF4	NM_004235.3	2810059	9	109287321	-1.11	0.463294	-4.23	0.00077	0.051852	7.12	84.616	0.417	96.422	7.6123	7.7321	6.6439	6.4807
FRMD6	NM_152330.3	5420070	14	51266134	-1.109	0.463615	-4.24	0.00075	0.051436	5.27	70.608	0.414	96.35	5.8383	5.8029	4.7866	4.6375
ELOVL7	NM_024930.1	5090706	5	60083823	-1.109	0.463615	-4.09	0.001008	0.059708	4.95	67.03	0.438	96.822	5.7126	5.3035	4.4324	4.3662
MBOAT1	NM_001080480.1	5490414	6	20209754	-1.108	0.463937	-4.19	0.000821	0.053483	6.11	77.881	0.42	96.468	6.6464	6.6835	5.4313	5.6828
LOC100128010	XR_039737.1	3450019	17	44306294	-1.108	0.463937	-4.12	0.000942	0.057732	3.96	15.475	0.431	96.672	4.696	4.3321	3.4016	3.4114
TGIF1	NM_170695.2	4260189	18	3447873	-1.108	0.463937	-3.96	0.001319	0.069139	9.57	95.763	0.462	97.184	10.4039	9.8425	9.0362	8.9945
DUSP5	NM_004419.3	5390161	10	112260431	-1.108	0.463937	-3.94	0.001358	0.069975	10.79	98.069	0.466	97.248	11.5489	11.1382	10.4397	10.0306
FBXO5	NM_012177.2	4010097	6	153334023	-1.107	0.464258	-3.64	0.002512	0.099431	7.82	88.776	0.531	97.972	7.9905	8.7568	7.0756	7.4576
PHLDA1	NM_007350.3	5670367	12	76419517	-1.106	0.46458	-4.25	0.000735	0.050794	6.92	83.411	0.408	96.24	7.4599	7.4862	6.3395	6.3953
NEK2	NM_002497.2	4610669	1	211836142	-1.106	0.46458	-3.93	0.001391	0.070785	8.62	92.564	0.465	97.233	8.9694	9.3698	8.2757	7.8512
RWDD4A	NM_152682.2	5670164	4	184797910	-1.105	0.464902	-4.09	0.001005	0.059672	6.41	79.926	0.432	96.697	6.8017	7.1183	5.7395	5.9714
CTAGE4	XM_001726736.1	5220059	7	143219378	-1.104	0.465225	-4.12	0.000946	0.057785	3.81	6.235	0.426	96.57	4.5301	4.1884	3.2818	3.2295
PRRX2	NM_016307.3	4150204	9	131524659	-1.104	0.465225	-4.02	0.001152	0.064673	8.29	91.177	0.444	96.915	8.6025	9.0773	7.7256	7.7457
TMEM188	NM_153261.4	5340148	16	48628012	-1.103	0.465547	-3.91	0.001462	0.073099	7.33	85.96	0.465	97.241	7.6344	8.1365	6.6205	6.9443
TGFB1I1	NM_015927.3	7330142	16	31396652	-1.102	0.46587	-4.23	0.000761	0.051611	5.42	72.048	0.406	96.187	5.9585	5.974	4.9059	4.8225
ARAP3	NM_022481.5	7380255	5	141033803	-1.102	0.46587	-4.22	0.000782	0.052398	6.95	83.589	0.409	96.252	7.4281	7.5723	6.4093	6.3862
	BC064139	6100446	1	85391021	-1.102	0.46587	-3.81	0.001755	0.081265	5.82	75.649	0.482	97.504	6.0612	6.6774	5.1208	5.4134
FAM91A1	NM_144963.2	4920730	8	124824885	-1.102	0.46587	-3.45	0.003647	0.122074	6.46	80.312	0.571	98.306	6.5108	7.509	5.9401	5.8763
	AK095707	3460020	16	79981590	-1.101	0.466193	-3.95	0.001326	0.069139	6.77	82.478	0.453	97.072	7.3891	7.2435	5.9542	6.4756
LOC100134393	XR_037039.1	4060086			-1.1	0.466516	-4.14	0.000913	0.056995	8.62	92.577	0.418	96.437	9.0443	9.2925	7.9884	8.1487
LOC644695	XM_932310.2	6130152	17	44069024	-1.1	0.466516	-4.14	0.000915	0.056998	5.88	76.109	0.418	96.424	6.4677	6.3892	5.1867	5.4711
OSTM1	NM_014028.3	4060575	6	108469710	-1.1	0.466516	-4.06	0.001067	0.061922	5.55	73.304	0.431	96.68	5.9166	6.2824	5.0922	4.9066
ITPRIP	NM_033397.2	2690324	10	106072522	-1.1	0.466516	-4.02	0.001163	0.064747	6.69	81.917	0.439	96.833	7.0387	7.4405	6.0258	6.2537
RHEBL1	NM_144593.1	4590398	12	49458658	-1.1	0.466516	-3.99	0.001235	0.067121	5.16	69.503	0.444	96.924	5.4745	5.9524	4.5465	4.6809
FOXD1	NM_004472.2	3870500	5	72778221	-1.099	0.46684	-3.72	0.002131	0.089853	7.08	84.368	0.499	97.677	7.2808	7.9685	6.3625	6.6884
RPL10L	NM_080746.2	5050072	14	47120244	-1.099	0.46684	-3.69	0.00226	0.093018	4.54	58.193	0.505	97.743	5.0553	5.1254	4.3829	3.6004
LOC644350	XM_927511.3	6370246	17	62743	-1.096	0.467812	-3.94	0.001357	0.069975	5.3	70.92	0.447	96.979	6.1132	5.5888	4.7994	4.7111
KRTAP2-1	XM_926554.2	6020382	17	36456760	-1.096	0.467812	-3.86	0.001602	0.077349	4.98	67.305	0.464	97.224	5.769	5.2794	4.2388	4.6171
BIRC3	NM_001165.3	5080021	11	101713457	-1.095	0.468136	-4.21	0.000794	0.052827	6.32	79.348	0.4	96.066	6.8668	6.8699	5.789	5.7581
TOM1L1	NM_005486.1	5720112	17	50382447	-1.095	0.468136	-4.12	0.000957	0.058186	6.11	77.896	0.416	96.394	6.5274	6.7929	5.4879	5.6416
GPR137C	NM_001099652.1	2640300	14	52173780	-1.095	0.468136	-3.97	0.001276	0.067958	4.71	62.882	0.44	96.847	5.0273	5.4911	4.0803	4.2489
CDCA3	NM_031299.3	6370474	12	6828529	-1.095	0.468136	-3.43	0.003821	0.123896	7.91	89.23	0.568	98.277	8.4035	8.5097	6.8623	7.86
TUBB6	XM_940079.1	1570092			-1.094	0.468461	-4.11	0.00096	0.058205	8.57	92.405	0.414	96.354	9.2677	8.972	8.0492	8.0029
	CA419197	630671	9	21086722	-1.094	0.468461	-3.87	0.001582	0.077047	4.29	44.619	0.46	97.161	5.1028	4.5777	3.596	3.8963
LOC643319	XM_927980.1	5310632	8	107779156	-1.093	0.468786	-3.65	0.002426	0.097367	6	77.038	0.505	97.737	6.6021	6.4884	5.0564	5.8482
ACYP1	NM_001107.3	3440689	14	75530234	-1.092	0.469111	-3.8	0.001806	0.082593	7.75	88.395	0.47	97.315	8.0521	8.548	6.9896	7.427
NEK6	NM_014397.3	5860463	9	126154389	-1.091	0.469436	-3.74	0.002038	0.088088	7.03	84.125	0.482	97.487	7.8712	7.2805	6.686	6.2841
SLMO1	NM_006553.2	1110088	18	12422060	-1.09	0.469761	-4.04	0.00111	0.063304	6.87	83.104	0.421	96.475	7.5823	7.2476	6.2287	6.4214
RNU6ATAC	NR_023344.1	6960048	9	137029580	-1.09	0.469761	-3.64	0.002476	0.098696	5.29	70.852	0.503	97.718	5.7517	5.9262	5.1396	4.3575
LOC653596	XM_934642.1	1050370	2	110743985	-1.09	0.469761	-2.66	0.018097	0.257049	3.41	0.207	0.886	99.445	3.6398	4.2714	3.6629	2.0684
KBTBD8	NM_032505.1	6370523	3	67144173	-1.089	0.470087	-3.93	0.00139	0.070785	6	77.06	0.44	96.852	6.2891	6.8061	5.4392	5.478
ABCB10	NM_012089.1	4810048	1	227719373	-1.089	0.470087	-3.35	0.004525	0.13588	6.92	83.432	0.582	98.391	7.0061	7.9273	6.1176	6.6381
MAP2K4	NM_003010.2	3420358	17	11986100	-1.088	0.470413	-3.95	0.001349	0.069819	6.34	79.507	0.436	96.784	7.1271	6.649	5.8717	5.7276
TGM2	NM_198951.1	2940446	20	36766459	-1.088	0.470413	-3.83	0.001719	0.080398	4.98	67.411	0.459	97.154	5.5008	5.5545	4.7505	4.1293
ERBB3	NM_001005915.1	3120608	12	54765433	-1.088	0.470413	-3.54	0.003068	0.110838	5.72	74.811	0.526	97.934	6.2188	6.3006	4.7289	5.6139
AURKB	NM_004217.2	6770026	17	8108342	-1.088	0.470413	-3.47	0.003525	0.119862	8.01	89.769	0.544	98.08	8.6748	8.4331	7.0087	7.9242
ATP2A2	NM_170665.2	5810189	12	109269162	-1.087	0.470739	-3.71	0.002152	0.090423	8.7	92.899	0.481	97.485	9.5742	8.9064	8.0114	8.2962
BDNF	NM_001709.3	770603	11	27633301	-1.087	0.470739	-3.32	0.004799	0.140453	8.56	92.369	0.587	98.433	8.6916	9.5257	7.6803	8.3633
WFDC3	NM_181522.1	4280048	20	43837583	-1.086	0.471066	-3.99	0.001236	0.067121	6.72	82.118	0.425	96.545	7.4584	7.0668	6.2738	6.0796
LOC203547	NM_001017980.2	7550743	X	150328271	-1.085	0.471392	-4.15	0.0009	0.056542	8.55	92.333	0.397	96.022	9.0195	9.1741	7.9863	8.0365
SLC39A1	NM_014437.3	5670368	1	153931812	-1.085	0.471392	-4.07	0.001052	0.061279	7.98	89.604	0.41	96.28	8.5178	8.5236	7.2737	7.5967
LOC653108	XR_016129.1	1400543	21	13973082	-1.083	0.472046	-4.06	0.001072	0.062131	5.53	73.098	0.408	96.236	6.0018	6.131	4.8361	5.1311
LOC256483	XM_945643.2	6660075			-1.083	0.472046	-3.8	0.001814	0.082722	4	18.852	0.458	97.137	4.2311	4.8546	3.4016	3.5177
S100A16	NM_080388.1	110468	1	153579715	-1.083	0.472046	-3.7	0.002213	0.09178	7.77	88.497	0.479	97.447	8.2544	8.3687	6.8691	7.5879
CMTM3	NM_001048251.1	6020746	16	65204490	-1.082	0.472374	-4.02	0.001153	0.064686	6.31	79.3	0.414	96.365	6.9595	6.7518	5.9287	5.6178
SGCB	NM_000232.3	1510471	4	52582124	-1.082	0.472374	-3.81	0.001762	0.081389	5.38	71.684	0.453	97.07	5.7392	6.1031	4.5917	5.0871
MKNK1	NM_003684.3	6450278	1	46795909	-1.08	0.473029	-4.06	0.001079	0.062358	7.48	86.867	0.405	96.164	8.1101	7.9355	6.8157	7.0703
MTMR12	NM_001040446.1	6590685	5	32264395	-1.079	0.473357	-4.11	0.000978	0.058723	5.83	75.753	0.395	95.973	6.4658	6.2754	5.2532	5.3305
TK1	NM_003258.2	4730196			-1.079	0.473357	-3.79	0.001835	0.083239	8.88	93.646	0.453	97.068	9.4686	9.3636	8.0296	8.645
TMED7	NM_181836.3	6560162	5	114977361	-1.079	0.473357	-3.78	0.001891	0.084356	7.95	89.439	0.457	97.125	8.1904	8.7864	7.5275	7.2905
SPC25	NM_020675.3	5860021	2	169727606	-1.079	0.473357	-3.76	0.001952	0.085936	5.52	73.009	0.46	97.159	6.1902	5.9223	4.6776	5.2765
GFRAL	NM_207410.2	6520475	6	55264185	-1.079	0.473357	-2.9	0.011279	0.210808	3.2	0.015	0.736	99.113	3.5894	3.8824	3.3641	1.9499
KDELR3	NM_016657.1	540129	22	37207271	-1.078	0.473685	-4.13	0.000934	0.057372	7.98	89.632	0.39	95.873	8.4658	8.5766	7.4117	7.475
FAM69B	XM_001130258.1	3450114			-1.078	0.473685	-4.04	0.001111	0.063304	7.75	88.374	0.404	96.159	8.4216	8.1563	7.3009	7.1213
ANTXR1	NM_032208.1	5700025	2	69171531	-1.078	0.473685	-3.6	0.002685	0.10343	5.18	69.73	0.494	97.616	6.0356	5.4051	4.888	4.3972
DSN1	NM_024918.2	3190102	20	34814159	-1.078	0.473685	-3.57	0.002901	0.107926	6.21	78.622	0.504	97.728	6.8173	6.6856	5.2609	6.0855
MKX	NM_173576.1	6620017	10	28001951	-1.077	0.474013	-4.05	0.001087	0.062682	5.23	70.303	0.402	96.108	5.8767	5.6666	4.5877	4.801
	BU536065	3520168	19	53113558	-1.076	0.474342	-3.92	0.001415	0.071576	12.14	99.325	0.423	96.502	12.9133	12.4406	11.6092	11.5934
C5orf15	NM_020199.1	3420692	5	133319226	-1.076	0.474342	-3.65	0.002426	0.097367	8.54	92.283	0.479	97.442	8.8461	9.3114	7.7101	8.2953
MGC39900	NM_194324.1	4200070	X	103103900	-1.076	0.474342	-3.18	0.006368	0.161078	6.87	83.123	0.616	98.628	6.9657	7.8565	5.9522	6.7171
ROD1	NM_005156.4	6370678	9	114020788	-1.075	0.474671	-4.04	0.001111	0.063304	8.86	93.578	0.401	96.087	9.244	9.5479	8.3023	8.3386
LOC649025	XM_938110.1	4640487			-1.075	0.474671	-4.02	0.001155	0.064737	6.34	79.465	0.404	96.151	6.8173	6.9358	5.6447	5.9582
APBA2	NM_005503.2	3710053	15	27197462	-1.075	0.474671	-3.85	0.001619	0.07748	3.83	7.065	0.435	96.748	4.5693	4.1565	3.1099	3.4662
PNO1	NM_020143.2	2000450	2	68256487	-1.074	0.475	-4.09	0.001014	0.059991	8.42	91.8	0.391	95.893	8.9356	8.9826	7.9832	7.7878
CDV3	NM_017548.3	3130356	3	134791122	-1.074	0.475	-3.95	0.001333	0.069174	9.44	95.406	0.415	96.377	10.1865	9.7641	8.8675	8.9356
MGC52282	NM_178453.2	380437	16	2829781	-1.074	0.475	-3.91	0.001463	0.073099	5.43	72.198	0.424	96.532	5.7585	6.1779	4.7707	5.0172
LOC654159	XM_940130.1	1240634			-1.074	0.475	-3.73	0.002096	0.089167	3.39	0.176	0.46	97.163	3.6281	4.2305	2.7042	3.0058
LOC643357	XM_926688.1	290326	7	55767228	-1.073	0.47533	-4	0.001208	0.066239	10.62	97.874	0.405	96.166	11.0787	11.2377	9.9268	10.2442
BMI1	NM_005180.5	1090292	10	22659819	-1.073	0.47533	-3.85	0.001644	0.078199	9.13	94.523	0.434	96.727	9.3963	9.9432	8.6008	8.5924
PPIL5	NM_203467.1	10253	14	49150854	-1.072	0.475659	-4.08	0.00103	0.060521	8.49	92.117	0.39	95.886	8.9572	9.1051	7.8857	8.032
LOC645638	XR_040455.1	70121			-1.072	0.475659	-3.71	0.002173	0.090978	4.86	65.736	0.461	97.178	5.6772	5.1166	4.5203	4.1293
CD83	NM_001040280.1	5050162	6	14136583	-1.069	0.476649	-3.97	0.001295	0.068631	7.76	88.442	0.406	96.185	8.2355	8.3583	7.0444	7.4109
MERTK	NM_006343.2	7550066	2	112503000	-1.069	0.476649	-3.93	0.001388	0.070785	5.82	75.707	0.412	96.327	6.2119	6.5058	5.1314	5.448
	BG207970	7330373	6	82293845	-1.069	0.476649	-3.51	0.00326	0.115409	3.95	14.694	0.504	97.724	4.5623	4.4062	3.8376	2.9935
GNG10	NM_001017998.2	6370717	9	113471394	-1.068	0.47698	-4.05	0.001098	0.063025	6.12	77.989	0.39	95.888	6.5939	6.7217	5.4846	5.6943
FBXO30	NM_032145.4	2510048	6	146161586	-1.068	0.47698	-4.04	0.001109	0.063304	6.59	81.216	0.391	95.905	7.1806	7.0695	6.1716	5.9419
SLC36A4	NM_152313.2	380484	11	92881248	-1.066	0.477641	-4.05	0.0011	0.063055	5.83	75.766	0.387	95.799	6.3673	6.3651	5.414	5.1867
TADA3	NM_133480.1	3990593	3	9825128	-1.066	0.477641	-3.97	0.001281	0.068131	3.61	1.328	0.401	96.083	3.981	4.3027	3.1583	2.9935
FHL1	NM_001449.3	4640446	X	135120766	-1.066	0.477641	-3.8	0.001808	0.082605	5.69	74.572	0.433	96.722	6.3971	6.054	4.9307	5.3877
TNFSF10	NM_003810.2	870202	3	173706550	-1.066	0.477641	-3.59	0.002741	0.104504	3.2	0.017	0.478	97.417	3.6398	3.8208	3.0394	2.2899
TERF1	NM_003218.2	4560634	8	74121397	-1.066	0.477641	-2.86	0.012141	0.218376	3.75	4.194	0.728	99.094	3.961	4.601	3.8635	2.5663
LOC400890	XM_379036.3	4540358	22	19637545	-1.065	0.477973	-4.05	0.001085	0.062669	7.64	87.76	0.384	95.727	8.2188	8.1174	7.0175	7.1897
PPAP2B	NM_003713.3	7050575	1	56960852	-1.065	0.477973	-4.01	0.001177	0.065299	8.66	92.77	0.392	95.929	9.0875	9.299	8.0296	8.2263
URB2	NM_014777.2	1580433	1	229795341	-1.065	0.477973	-3.96	0.001322	0.069139	6.9	83.32	0.402	96.102	7.2685	7.6051	6.286	6.458
CLIP4	NM_024692.3	3310672	2	29258931	-1.064	0.478304	-4.09	0.001006	0.059672	5.67	74.39	0.377	95.543	6.206	6.202	5.1396	5.1407
TGFBR2	NM_001024847.2	6560091	3	30709225	-1.064	0.478304	-3.99	0.001244	0.067282	6.26	78.961	0.395	95.99	6.6815	6.9101	5.8494	5.6139
DCTN5	NM_032486.2	5130468	16	23588370	-1.064	0.478304	-3.98	0.001253	0.067623	8.65	92.712	0.396	96.007	9.2894	9.076	7.9889	8.2478
RBMS1	NM_002897.3	2060600	2	160839146	-1.06	0.479632	-4.07	0.00105	0.061208	5.44	72.311	0.375	95.488	5.9915	5.9481	4.8812	4.939
S100A3	NM_002960.1	150100	1	153519825	-1.06	0.479632	-3.9	0.00148	0.073735	6.67	81.779	0.406	96.183	7.057	7.3361	5.9716	6.3007
IMPAD1	NM_017813.2	1110367	8	58038146	-1.059	0.479965	-4.06	0.001063	0.061836	6.69	81.902	0.375	95.48	7.1848	7.2504	6.1279	6.1896
ARFIP1	NM_001025593.1	10753	4	153832543	-1.059	0.479965	-3.73	0.002086	0.089028	7.48	86.86	0.438	96.814	7.7924	8.2303	6.7325	7.1712
DCDC2B	NM_001099434.1	2120113	1	32454156	-1.059	0.479965	-3.68	0.002284	0.093565	4.08	26.102	0.447	96.966	4.3027	4.9187	3.4307	3.6733
C6orf1	NM_001008703.1	520044	6	34324765	-1.059	0.479965	-3.15	0.006799	0.165603	3.79	5.714	0.597	98.499	4.4819	4.1652	3.8208	2.708
FAM43A	NM_153690.4	1690630	3	194409702	-1.057	0.48063	-3.64	0.002499	0.099101	6.17	78.351	0.455	97.097	6.4096	6.987	5.4421	5.8398
KIF23	NM_004856.4	4120278	15	67526297	-1.057	0.48063	-3.63	0.002567	0.100687	7.91	89.213	0.457	97.131	8.2938	8.5728	7.0477	7.7043
MRPS16	NM_016065.3	4830577	10	75008750	-1.056	0.480964	-4.05	0.00109	0.062682	6.74	82.251	0.373	95.442	7.303	7.2254	6.2342	6.1827
ZNF367	NM_153695.2	6480176	9	98190312	-1.056	0.480964	-3.75	0.001989	0.086918	3.98	16.845	0.428	96.61	4.2138	4.7951	3.4307	3.4662
ACYP1	NM_001107.3	5910148	14	75520237	-1.055	0.481297	-3.67	0.002369	0.09624	9.01	94.11	0.445	96.938	9.4012	9.6637	8.1712	8.784
NIPBL	NM_015384.3	770594	5	37099849	-1.054	0.481631	-3.82	0.001722	0.080438	3.45	0.33	0.412	96.314	4.1685	3.7888	2.7638	3.0844
LOC644982	XM_932558.2	2190025	1	226822832	-1.054	0.481631	-3.65	0.002457	0.098259	3.87	9.329	0.448	96.987	4.3546	4.4412	3.682	3.0058
CHMP1B	NM_020412.3	3940148	18	11842206	-1.053	0.481965	-3.96	0.001322	0.069139	7.91	89.225	0.385	95.744	8.5715	8.2981	7.311	7.4529
B3GNT6	NM_006876.1	2260220	11	65869876	-1.052	0.482299	-3.94	0.001351	0.069819	6.52	80.761	0.386	95.78	7.2011	6.8925	5.9471	6.042
TGOLN2	NM_006464.2	5700672	2	85545437	-1.052	0.482299	-3.72	0.002111	0.089543	7.58	87.434	0.429	96.636	8.1007	8.1132	6.7544	7.3545
AHNAK	NM_001620.1	2810482	11	62301545	-1.051	0.482634	-4.03	0.001134	0.064011	4.27	43.133	0.369	95.34	4.837	4.7623	3.7199	3.7783
ATP2B4	NM_001684.3	6900630	1	201979139	-1.051	0.482634	-4.02	0.001159	0.064747	6.06	77.481	0.371	95.395	6.6194	6.5503	5.5942	5.4744
CUL5	NM_003478.3	6060025	11	107483342	-1.051	0.482634	-3.86	0.001616	0.07748	8.14	90.434	0.401	96.085	8.4737	8.8648	7.5138	7.7226
HRIHFB2122	NM_138632.1	4880332	22	36484062	-1.05	0.482968	-4.02	0.00117	0.064985	4.57	59.234	0.371	95.376	5.0346	5.1613	4.0803	4.0164
KRT18P13	XM_001726959.1	6110026	9	99502526	-1.049	0.483303	-3.98	0.00126	0.067623	9.32	95.099	0.377	95.535	9.7978	9.8995	8.691	8.9074
ZNF626	NM_001076675.2	1820082	19	20802988	-1.049	0.483303	-3.22	0.005916	0.154983	3.94	13.794	0.556	98.198	4.7107	4.2138	2.9425	3.8849
FXYD5	NM_144779.1	1470332	19	40352457	-1.047	0.483974	-3.7	0.002235	0.092178	8.57	92.386	0.427	96.585	9.1747	9.0092	7.7528	8.3379
CREB3L3	NM_032607.1	3450373	19	4123969	-1.045	0.484645	-3.47	0.003538	0.12012	4.16	33.463	0.477	97.408	4.4301	4.9342	3.9625	3.3125
ASAP1	NM_018482.2	6840129	8	131135896	-1.044	0.484981	-3.99	0.001242	0.067255	8.85	93.532	0.369	95.327	9.2812	9.4526	8.3062	8.3386
CXXC5	NM_016463.7	1050279	5	139041167	-1.044	0.484981	-3.86	0.001596	0.077324	8.05	90.007	0.39	95.884	8.3952	8.7588	7.4471	7.6185
MYBL1	NM_001080416.1	6110564	8	67637123	-1.044	0.484981	-3.59	0.00275	0.104562	5.67	74.335	0.445	96.941	5.8451	6.5281	5.0638	5.222
LOC646132	XM_929095.1	780128	20	62193338	-1.044	0.484981	-3.56	0.002943	0.108854	3.69	2.585	0.454	97.085	4.1785	4.2382	3.5307	2.7975
ASAP1	NM_018482.2	7000072	8	131135973	-1.043	0.485317	-3.99	0.001242	0.067255	8.22	90.826	0.367	95.293	8.8069	8.6696	7.6504	7.7391
GPR137B	NM_003272.1	1240392	1	234438518	-1.043	0.485317	-3.94	0.001351	0.069819	5.99	76.956	0.374	95.465	6.4293	6.5866	5.5694	5.3601
ARID3A	NM_005224.2	6510553	19	923539	-1.043	0.485317	-3.86	0.001589	0.077199	6.72	82.107	0.389	95.837	7.3942	7.086	6.0744	6.3194
PRAMEF1	NM_023013.1	6650730	1	12777085	-1.043	0.485317	-3.83	0.001718	0.080398	3.91	11.689	0.395	95.975	4.4899	4.3702	3.1746	3.6004
EGFLAM	NM_182801.1	6270372	5	38464555	-1.043	0.485317	-3.74	0.00205	0.088327	4.75	63.662	0.412	96.333	5.5294	5.015	4.1361	4.3227
LOC646926	XM_929887.1	6770040	14	85738243	-1.043	0.485317	-3.34	0.00457	0.136983	4.03	21.509	0.507	97.756	4.4734	4.6354	3.971	3.0523
CCDC144NL	NM_001004306.1	270070	17	20767093	-1.042	0.485654	-3.68	0.002324	0.094797	4.09	26.931	0.424	96.521	4.6386	4.5838	3.8734	3.2652
NUP153	NM_005124.2	3840131	6	17724007	-1.041	0.48599	-3.98	0.001256	0.067623	7.52	87.083	0.365	95.238	8.0521	8.0376	6.929	7.0787
TULP3	NM_003324.3	6840014	12	2920248	-1.041	0.48599	-3.83	0.001708	0.080199	5.65	74.201	0.392	95.92	6.1059	6.2339	4.9241	5.3342
BUB1	NM_004336.2	2070224	2	111112194	-1.041	0.48599	-3.75	0.001985	0.086808	8.16	90.504	0.407	96.214	8.4169	8.9397	7.6198	7.6539
NCRNA00081	NR_024142.1	4610022	10	112660280	-1.041	0.48599	-3.7	0.002222	0.091978	5.97	76.863	0.418	96.426	6.3695	6.6209	5.7173	5.1918
SKA1	NM_145060.3	2030630	18	46174187	-1.041	0.48599	-3.47	0.003536	0.12012	6.28	79.071	0.471	97.339	6.4159	7.1881	5.6365	5.8853
TSPAN1	NM_005727.2	2510358	1	46423965	-1.04	0.486327	-3.45	0.003662	0.122133	5.47	72.601	0.473	97.368	5.6149	6.3683	4.7866	5.1174
NQO2	NM_000904.2	2710682			-1.039	0.486665	-3.73	0.002073	0.08891	7.94	89.39	0.408	96.227	8.7285	8.1948	7.3903	7.4552
DNAJB6	NM_005494.2	1230224	7	156867756	-1.039	0.486665	-3.57	0.002904	0.107926	8.76	93.182	0.445	96.932	9.2713	9.2861	7.883	8.5957
	H55152	1030092	22	17026507	-1.038	0.487002	-3.16	0.006673	0.164535	3.98	16.686	0.557	98.213	4.5465	4.4412	2.9131	3.9985
PRKCDBP	NM_145040.2	7550307	11	6340362	-1.037	0.48734	-3.94	0.001359	0.069975	7.56	87.309	0.366	95.255	8.0002	8.1572	7.1139	6.9705
SFRS2IP	NM_004719.2	780010	12	46313050	-1.037	0.48734	-3.86	0.001603	0.077349	7.97	89.575	0.381	95.643	8.4256	8.5594	7.2841	7.6266
LOC729409	XR_039028.1	4590671			-1.036	0.487678	-3.29	0.005108	0.144484	3.84	7.599	0.512	97.796	4.3638	4.347	2.8386	3.8009
41519	NM_004404.3	630601	2	241941906	-1.035	0.488016	-3.79	0.001841	0.083286	10.24	97.224	0.391	95.907	10.6366	10.8783	9.5313	9.9131
CCNE2	NM_057735.1	4760154	8	95962279	-1.035	0.488016	-2.19	0.045062	0.380958	6.63	81.497	1.117	99.746	6.2166	8.0754	5.5858	6.6366
CABLES2	NM_031215.2	2070403	20	60963850	-1.034	0.488354	-3.88	0.001549	0.076217	5.01	67.744	0.373	95.446	5.4019	5.6535	4.3954	4.5927
FOXA2	NM_021784.3	2230086	20	22512901	-1.034	0.488354	-3.72	0.002124	0.089853	3.76	4.658	0.404	96.142	4.4473	4.1133	3.0394	3.453
	CR738291	5290497	14	19846958	-1.033	0.488693	-3.79	0.001848	0.083286	5.33	71.171	0.389	95.848	5.9206	5.7667	5.0193	4.601
MOBKL2B	NM_024761.3	940630	9	27326922	-1.033	0.488693	-3.62	0.002609	0.10166	4.24	40.109	0.424	96.511	4.6386	4.8677	4.0177	3.4224
	AW665831	1470364	17	44692112	-1.033	0.488693	-2.68	0.017284	0.251733	4.29	44.378	0.75	99.153	5.1073	4.5068	4.4819	3.0656
MIR1296	NR_031566.1	4150347			-1.032	0.489032	-3.79	0.001856	0.083458	4.11	28.962	0.387	95.795	4.5219	4.732	3.4016	3.7888
ARL5A	NM_001037174.1	2630209	2	152657782	-1.032	0.489032	-3.75	0.002013	0.087471	8.21	90.815	0.395	95.971	8.4856	8.97	7.7343	7.6579
LOC100132209	XM_001714087.1	6100528	10	47807459	-1.031	0.489371	-3.57	0.002911	0.10799	4.41	52.334	0.433	96.71	5.2408	4.6175	4.0415	3.7545
ASCC3	NM_022091.3	4890376	6	101411196	-1.031	0.489371	-2.67	0.017824	0.255439	5.29	70.809	0.753	99.164	5.3231	6.2863	5.3796	4.1685
LOC650887	XM_939975.1	3870279			-1.029	0.49005	-3.79	0.001851	0.083352	3.58	1.099	0.384	95.717	4.2659	3.9314	3.2023	2.9362
PAG1	NM_018440.3	1240228	8	82047314	-1.028	0.49039	-3.86	0.001617	0.07748	4.13	30.482	0.369	95.329	4.515	4.7676	3.7098	3.5177
TYMP	NM_001113755.1	3130307	22	50965617	-1.028	0.49039	-2.28	0.037746	0.353965	3.94	13.997	1.011	99.655	4.6309	4.2783	4.4056	2.4481
KRTAP7-1	XM_927228.2	3610433	21	31123761	-1.027	0.49073	-3.81	0.001763	0.081389	4.12	30.044	0.376	95.52	4.5927	4.6799	3.7954	3.4224
C1QL4	NM_001008223.1	4920047	12	49726378	-1.027	0.49073	-3.73	0.0021	0.089255	6.2	78.54	0.392	95.924	6.9383	6.4884	5.7881	5.5853
DUSP9	NM_001395.1	1660050	X	152569457	-1.025	0.49141	-3.83	0.001686	0.079487	5.23	70.295	0.369	95.325	5.8767	5.6137	4.8238	4.6171
STARD7	NM_020151.2	4210750	2	96214684	-1.024	0.491751	-3.9	0.00149	0.073834	10.32	97.394	0.357	95.029	10.8773	10.7972	9.7148	9.9108
CSTF1	NM_001324.2	7150204	20	54401041	-1.024	0.491751	-3.77	0.001938	0.08561	4.02	20.698	0.38	95.624	4.6156	4.4539	3.7098	3.3125
GOLPH4	NM_014498.2	5870221	3	169209931	-1.024	0.491751	-3.57	0.002885	0.107536	7.02	84.057	0.422	96.496	7.2022	7.8584	6.5309	6.4807
RAB3IL1	NM_013401.2	3460161	11	61664819	-1.023	0.492092	-3.78	0.001897	0.084436	7.27	85.543	0.377	95.53	7.7742	7.7882	6.5539	6.9632
PIK3AP1	NM_152309.2	5220189	10	98362041	-1.023	0.492092	-3.66	0.002385	0.096678	5.15	69.363	0.399	96.062	5.8723	5.4529	4.8184	4.4609
INF2	NM_032714.1	2140360	14	104241753	-1.022	0.492433	-3.89	0.00152	0.07511	5.22	70.123	0.355	94.963	5.6514	5.8029	4.6319	4.7789
XRCC3	NM_001100118.1	670014	14	104164119	-1.022	0.492433	-3.86	0.001611	0.07748	6.42	80.043	0.361	95.139	7.0401	6.8279	5.8241	6.0001
EHD1	NM_006795.2	1780619	11	64620296	-1.022	0.492433	-3.82	0.001745	0.081113	9.32	95.071	0.368	95.312	9.9817	9.6726	8.8827	8.7273
LOC100008588	NR_003286.1	3180609			-1.021	0.492775	-3.59	0.002774	0.105165	9.15	94.58	0.412	96.329	9.5791	9.7455	8.9424	8.3407
ARL2BP	NM_012106.3	2570523	16	55844676	-1.02	0.493116	-3.9	0.00149	0.073834	9.05	94.258	0.352	94.878	9.4778	9.6429	8.5174	8.5624
PANK4	NM_018216.1	7000553	1	2442154	-1.02	0.493116	-3.89	0.001505	0.074416	5.73	74.921	0.353	94.906	6.2298	6.2462	5.3099	5.1251
LOC100127922	XR_038410.1	5130403	5	173921577	-1.02	0.493116	-3.87	0.001569	0.076781	6.1	77.807	0.356	94.986	6.7025	6.5189	5.664	5.5167
ZNF217	NM_006526.2	60672	20	52184280	-1.019	0.493458	-3.71	0.00218	0.091013	6.4	79.871	0.385	95.746	6.6836	7.1377	5.8082	5.9745
LOC649944	XM_945734.1	2320632			-1.019	0.493458	-3.67	0.002356	0.095854	3.72	3.428	0.393	95.943	4.3972	4.0631	3.4161	3.0058
LHFPL2	NM_005779.1	360132	5	77817210	-1.018	0.4938	-3.85	0.00163	0.077913	6.27	79.033	0.357	94.999	6.9115	6.6553	5.7531	5.7776
IFNAR1	NM_000629.2	7550181	21	33653639	-1.017	0.494143	-3.87	0.001583	0.077047	6.45	80.257	0.352	94.887	6.9971	6.9247	5.8432	6.0451
SCARNA8	NR_003009.1	2600403	9	19063694	-1.017	0.494143	-2.7	0.016626	0.248999	6.34	79.488	0.706	99.026	6.9595	6.7398	6.5607	5.1052
C16orf30	NM_024600.2	160070			-1.016	0.494485	-3.78	0.001887	0.084259	3.91	11.812	0.367	95.276	4.3546	4.4819	3.2295	3.5755
RASSF2	NM_170774.1	1980059	20	4761060	-1.015	0.494828	-3.84	0.00168	0.079328	5.47	72.63	0.355	94.938	5.9434	6.0221	4.8432	5.093
C21orf45	NM_018944.2	160593	21	33641191	-1.015	0.494828	-3.73	0.002066	0.08886	7.47	86.831	0.374	95.461	7.8732	8.0909	6.7825	7.1517
SPCS3	NM_021928.1	7050026	4	177487232	-1.015	0.494828	-3.69	0.00228	0.093482	5.47	72.594	0.384	95.713	5.7477	6.2102	4.8812	5.0468
LOC730978	XR_037258.1	1440504	1	222203833	-1.014	0.495171	-3.7	0.002217	0.091872	3.9	10.779	0.38	95.619	4.6309	4.1739	3.4452	3.3311
BRDT	NM_001726.2	6130463	1	92190336	-1.014	0.495171	-3.24	0.00567	0.151311	3.78	5.295	0.491	97.591	4.3719	4.2067	2.8107	3.7409
REEP4	NM_025232.2	450196	8	22051677	-1.013	0.495515	-3.41	0.003955	0.125662	5.87	76.009	0.442	96.881	6.6433	6.0997	5.6342	5.0823
C10orf93	XM_001126217.1	4860608			-1.013	0.495515	-3.28	0.005157	0.145175	3.84	7.851	0.477	97.415	4.7387	3.9604	3.1099	3.5625
UGCG	NM_003358.1	3800647	9	113735032	-1.012	0.495858	-3.8	0.001827	0.083128	5.62	73.983	0.359	95.084	6.1762	6.0821	5.2706	4.9635
LOC221710	XM_927609.1	4670703	6	11243795	-1.012	0.495858	-3.61	0.002642	0.102612	6.1	77.83	0.395	95.981	6.3339	6.8865	5.6589	5.5366
ANO6	NM_001025356.1	7040674	12	44111807	-1.012	0.495858	-3.54	0.003038	0.110508	7.53	87.106	0.409	96.269	8.085	7.9817	6.7062	7.3366
	AI073473	2320397	2	191364268	-1.012	0.495858	-3.28	0.005159	0.145175	4.22	38.653	0.476	97.4	4.7038	4.747	4.1612	3.2652
GAS2L1	NM_152236.1	5910326	22	28038438	-1.011	0.496202	-3.79	0.001833	0.083239	4.7	62.656	0.358	95.06	5.263	5.1501	4.3446	4.0458
FSD1	NM_024333.1	3170019	19	4274704	-1.01	0.496546	-3.86	0.001599	0.077324	7.12	84.641	0.344	94.635	7.5473	7.7037	6.6282	6.6025
FH	NM_000143.2	1780348	1	241661128	-1.01	0.496546	-3.74	0.002029	0.087906	9.22	94.747	0.365	95.245	9.8258	9.6193	8.548	8.8776
FOXM1	NM_202003.1	2650364	12	2967199	-1.01	0.496546	-3.49	0.003358	0.11713	6	77.072	0.417	96.415	6.8225	6.1968	5.3645	5.6356
TROVE2	NM_001042370.1	4220278	1	191295419	-1.009	0.496891	-3.79	0.001858	0.083458	6.04	77.364	0.356	94.988	6.3934	6.7034	5.5061	5.5722
C1orf55	NM_152608.3	1010435	1	226170900	-1.008	0.497235	-3.67	0.002337	0.09523	7.82	88.779	0.376	95.526	8.1776	8.4712	7.1293	7.5032
DHRS9	NM_005771.3	630315	2	169660803	-1.008	0.497235	-3.62	0.002614	0.101773	5.58	73.547	0.388	95.827	6.3479	5.8131	5.1208	5.0232
CBFB	NM_001755.2	2600537	16	65691916	-1.007	0.49758	-3.71	0.002157	0.090558	8.48	92.045	0.367	95.283	8.8121	9.1588	7.8631	8.0942
	AI827529	6590047	5	150979989	-1.007	0.49758	-3.55	0.003026	0.11046	4.74	63.556	0.402	96.106	5.5328	4.9626	4.3604	4.121
LOC149501	XR_017100.2	2260037	1	155311079	-1.005	0.49827	-3.48	0.003472	0.119186	9.58	95.812	0.414	96.358	10.409	9.7632	8.973	9.1899
ADNP	NM_015339.2	1770551	20	49545229	-1.004	0.498616	-3.62	0.002587	0.10116	4.17	34.403	0.381	95.632	4.9307	4.413	3.6733	3.6629
LOC643814	XM_927094.1	4640091	5	152080922	-1.004	0.498616	-2.64	0.018841	0.26104	3.79	5.505	0.712	99.037	4.601	3.9802	3.971	2.6026
PMM2	NM_000303.1	1260315	16	8850487	-1.003	0.498961	-3.75	0.001994	0.08698	7.91	89.221	0.354	94.931	8.5733	8.2438	7.3687	7.4422
CAV2	NM_001233.3	2630577	7	115927676	-1.002	0.499307	-3.77	0.001914	0.084975	8.79	93.341	0.349	94.773	9.4236	9.1685	8.224	8.3649
ZNF268	NM_003415.1	6420609			-1.001	0.499654	-3.66	0.002421	0.097365	4.05	23.425	0.369	95.338	4.3387	4.7676	3.639	3.4662
PHLPP2	NM_015020.2	6560193	16	71679451	-1.001	0.499654	-3.52	0.003218	0.114467	5.4	71.887	0.4	96.07	6.0189	5.7816	5.1901	4.6083
LOC340598	XM_926996.1	4150128	X	152523670	-1	0.5	-3.81	0.00178	0.081842	6.13	78.019	0.34	94.463	6.5295	6.7273	5.6152	5.6416
HOXA4	NM_002141.4	7160553	7	27168591	-1	0.5	-3.57	0.002881	0.107469	5.82	75.664	0.386	95.763	6.4578	6.1819	5.0749	5.5654
GLCE	NM_015554.1	2350524	15	67351271	-1	0.5	-3.45	0.00367	0.122231	6.95	83.6	0.414	96.356	7.2163	7.6845	6.1941	6.7061
CRABP2	NM_001878.2	3400296	1	156669519	-1	0.5	-3.45	0.003714	0.123013	10.09	96.926	0.415	96.386	10.4478	10.7275	9.2665	9.9081
PCDHA2	NM_031496.1	270537	5	140165122	-0.999	0.500347	-2.85	0.012354	0.21944	3.7	2.795	0.601	98.541	3.8208	4.5697	3.7098	2.6835
ILKAP	NM_030768.2	580114	2	239079121	-0.998	0.500694	-3.73	0.002085	0.089028	7.15	84.819	0.351	94.855	7.6005	7.6937	6.4858	6.8132
	BG496257	2470450	8	25424180	-0.998	0.500694	-3.46	0.003608	0.121383	6.28	79.065	0.409	96.25	6.5849	6.9741	5.5042	6.0585
HSD17B11	NM_016245.3	6280008	4	88514916	-0.998	0.500694	-3.32	0.00481	0.140595	5.83	75.738	0.444	96.917	5.9247	6.7325	5.2609	5.3999
UNC45A	NM_001039675.1	7040435	15	89278721	-0.998	0.500694	-2.83	0.012851	0.222626	3.9	11.291	0.61	98.59	4.8233	3.9802	3.8914	2.9152
RND3	NM_005168.3	4210524	2	151325055	-0.997	0.501041	-3.8	0.001814	0.082722	7.34	85.977	0.338	94.385	7.8397	7.8307	6.936	6.74
LRRC8D	NM_018103.3	2650100	1	90173573	-0.997	0.501041	-3.79	0.001832	0.083239	5.89	76.232	0.338	94.396	6.4638	6.3194	5.3225	5.4671
RACGAP1	NM_013277.2	2190010	12	48669516	-0.997	0.501041	-3.6	0.002735	0.104453	8.52	92.2	0.377	95.541	8.8282	9.206	7.8392	8.2004
C4orf32	NM_152400.1	4590167	4	113328846	-0.997	0.501041	-3.07	0.008006	0.178642	5.71	74.718	0.518	97.857	5.6867	6.7259	5.1119	5.3065
DNAJB9	NM_012328.1	2760164	7	108002326	-0.996	0.501388	-3.69	0.002261	0.093018	6.85	82.977	0.357	95.003	7.1988	7.4888	6.4808	6.2145
SPRED1	NM_152594.1	5700707	15	36433449	-0.996	0.501388	-3.5	0.003348	0.116975	7.96	89.465	0.397	96.017	8.1554	8.7502	7.3534	7.5605
CARD6	NM_032587.2	450047	5	40890718	-0.996	0.501388	-3.32	0.004826	0.140645	3.73	3.538	0.441	96.866	3.8552	4.5911	3.4016	3.0523
VCX-C	NM_001001888.1	5570181	X	8394340	-0.995	0.501736	-3.61	0.002682	0.10343	3.9	10.902	0.372	95.414	4.6156	4.1739	3.2818	3.5177
SGK1	NM_005627.3	1410209	6	134491069	-0.993	0.502432	-3.43	0.003828	0.123896	6.45	80.229	0.408	96.219	7.2223	6.6673	6.1558	5.7482
FLJ20273	NM_019027.1	7380626	4	40120673	-0.993	0.502432	-3.01	0.009045	0.18932	5.78	75.362	0.532	97.989	6.3906	6.1656	5.8253	4.7444
HEBP1	NM_015987.3	360689	12	13127952	-0.992	0.50278	-3.77	0.001924	0.085253	8.28	91.101	0.336	94.305	8.7319	8.8097	7.6763	7.8814
MBLAC2	NM_203406.1	580671	5	89790301	-0.992	0.50278	-3.55	0.003	0.109728	5.36	71.489	0.38	95.609	5.6321	6.0747	4.6933	5.0288
MBNL2	NM_207304.1	990128	13	96844117	-0.992	0.50278	-3.35	0.004525	0.13588	5.61	73.837	0.427	96.591	6.0528	6.1557	5.4937	4.7303
WDSUB1	NM_152528.1	2650538	2	159800844	-0.991	0.503129	-3.75	0.001982	0.086775	7.3	85.778	0.337	94.334	7.7334	7.8681	6.9107	6.7097
GJC2	NM_020435.2	6520356	1	226414049	-0.991	0.503129	-3.71	0.002185	0.091013	5.5	72.838	0.346	94.707	6.0189	5.9669	5.1685	4.8353
IFFO2	NM_001136265.1	4900653	1	19231072	-0.991	0.503129	-3.24	0.005652	0.151237	6.92	83.443	0.455	97.099	7.8492	6.9927	6.5179	6.3417
DEGS1	NM_003676.2	5560398	1	222446889	-0.99	0.503478	-3.79	0.001844	0.083286	7.76	88.45	0.329	94.038	8.2776	8.2401	7.206	7.3321
SNTB2	NM_006750.3	840053	16	67851608	-0.99	0.503478	-3.44	0.003786	0.123413	4.86	65.72	0.402	96.119	5.4879	5.222	4.0559	4.6739
NME1-NME2	NM_001018136.1	1510609	17	46593607	-0.989	0.503827	-3.79	0.001848	0.083286	7.59	87.506	0.329	94.019	8.0605	8.1081	7.0373	7.153
GEM	NM_181702.1	1170246	8	95331564	-0.988	0.504176	-3.73	0.002074	0.08891	5.41	71.923	0.338	94.389	5.8968	5.9018	4.775	5.0468
BNC1	NM_001717.2	4880164	15	81717796	-0.988	0.504176	-3.4	0.004083	0.127637	4.11	29.203	0.408	96.225	4.8087	4.4062	3.9082	3.3311
STMN1	NM_005563.3	4260731	1	26232898	-0.987	0.504526	-3.65	0.002472	0.098681	6.74	82.257	0.352	94.891	7.1962	7.265	6.043	6.4446
PGM2L1	NM_173582.3	7210093	11	74041643	-0.986	0.504876	-3.74	0.002062	0.088763	4.91	66.541	0.335	94.25	5.4745	5.3397	4.526	4.3154
	BX647520	3800424	12	68259740	-0.986	0.504876	-3.7	0.002228	0.092139	6.93	83.471	0.341	94.51	7.4141	7.4299	6.596	6.2765
PTTG3P	NR_002734.1	5960224	8	67842374	-0.986	0.504876	-3.39	0.004193	0.129977	10.01	96.763	0.409	96.263	10.3003	10.7097	9.2271	9.8099
IFNA13	NM_006900.2	160594	9	21358025	-0.985	0.505226	-3.75	0.002006	0.087262	3.63	1.643	0.331	94.093	4.1956	4.053	3.0628	3.2152
CENTB2	NM_012287.3	3060747	3	196477638	-0.985	0.505226	-3.68	0.002318	0.094673	5.6	73.784	0.343	94.584	5.9247	6.2628	5.071	5.1471
AURKA	NM_198434.1	5420309	20	54944646	-0.985	0.505226	-3.65	0.002459	0.098259	9.02	94.167	0.349	94.8	9.4151	9.6168	8.3613	8.7004
LOC440041	XR_016142.2	630064	11	54822124	-0.984	0.505576	-3.75	0.002016	0.087511	3.6	1.203	0.329	94.029	4.0045	4.1739	3.1583	3.0523
NMU	NM_006681.1	7050220	4	56166204	-0.984	0.505576	-3.66	0.002406	0.097223	9.69	96.064	0.346	94.709	10.0552	10.3008	9.3348	9.0523
PLAUR	NM_001005376.1	360475	19	48842368	-0.984	0.505576	-3.59	0.002793	0.105703	6.87	83.134	0.36	95.118	7.1292	7.6026	6.3947	6.3698
RHOD	NM_014578.2	4180270	11	66595830	-0.983	0.505927	-3.53	0.003111	0.112242	7.73	88.292	0.37	95.367	8.4253	8.0186	7.4148	7.0627
LOC642946	XM_927142.1	4010632	1	211097620	-0.983	0.505927	-3.17	0.006524	0.163014	4.18	35.574	0.463	97.203	5.1274	4.2216	3.7677	3.6145
RHOB	NM_004040.2	3400332	2	20512363	-0.982	0.506277	-2.76	0.014796	0.237405	8.65	92.7	0.61	98.588	9.5507	8.7228	8.6651	7.644
RNASE4	NM_194430.1	5910382	14	20237478	-0.981	0.506628	-3.72	0.00213	0.089853	5.1	68.874	0.331	94.091	5.5103	5.6794	4.701	4.526
OR4D9	NM_001004711.1	50079	11	59039506	-0.981	0.506628	-3.48	0.003443	0.118646	3.93	13.517	0.378	95.575	4.3546	4.4951	3.1583	3.729
ANXA2	NM_001002858.1	4780615	15	58427088	-0.98	0.50698	-3.76	0.001942	0.085639	12.36	99.45	0.321	93.703	12.8822	12.8109	11.853	11.8795
LOC649722	XM_938795.1	4850341			-0.979	0.507331	-3.68	0.002289	0.093681	4.56	58.934	0.334	94.235	5.1742	4.9307	3.9878	4.1591
FBXL18	NM_024963.4	990523	7	5515625	-0.979	0.507331	-3.6	0.002712	0.104099	8.72	93.013	0.351	94.847	9.2343	9.1899	8.018	8.4479
RIMBP3C	NM_001128633.1	360307	22	21905496	-0.979	0.507331	-3.55	0.002991	0.109709	4.32	46.311	0.36	95.124	4.5693	5.0421	3.8994	3.7545
OPRM1	NM_001008503.1	1500382	6	154412124	-0.979	0.507331	-2.88	0.011563	0.213025	4.32	46.63	0.553	98.166	5.3656	4.2558	3.6273	4.0355
ATP1B1	NM_001677.3	4180452	1	167368155	-0.978	0.507683	-3.58	0.002817	0.106	6.95	83.593	0.353	94.914	7.2714	7.6066	6.3075	6.6137
CDKN1C	NM_000076.1	5890653	11	2861687	-0.978	0.507683	-3.32	0.004779	0.140128	5.81	75.59	0.413	96.344	5.961	6.6398	5.162	5.4819
DDR1	NM_013994.2	7100630	6	30867497	-0.977	0.508035	-2.97	0.009725	0.196303	4.67	61.843	0.517	97.84	5.5261	4.79	4.5838	3.7783
C1orf124	NM_001010984.1	4880181	1	229554328	-0.975	0.50874	-3.66	0.002411	0.097318	5.09	68.777	0.334	94.224	5.4341	5.7292	4.5465	4.6664
C21orf58	NM_199071.2	70471	21	46545979	-0.975	0.50874	-3.41	0.00399	0.126389	4.23	39.421	0.386	95.776	4.9487	4.4819	3.9625	3.5177
CDC2L6	NM_015076.3	3930452	6	111038242	-0.974	0.509093	-3.64	0.00252	0.099532	6.73	82.185	0.337	94.351	7.2081	7.2221	6.0651	6.4162
CENPO	NM_024322.1	4560682	2	24893146	-0.974	0.509093	-3.64	0.002522	0.099532	5.45	72.421	0.337	94.353	5.7652	6.1152	4.9851	4.9464
AHNAK	NM_024060.2	3710400	11	62201211	-0.973	0.509446	-3.52	0.003173	0.1136	5.21	70.06	0.357	95.035	5.7757	5.6178	4.9628	4.4855
GGH	NM_003878.1	2510338	8	64092673	-0.973	0.509446	-3.42	0.003904	0.124879	9.81	96.329	0.381	95.638	10.1153	10.4724	9.0636	9.5776
LOC651747	XM_940963.1	6770735			-0.973	0.509446	-3.39	0.004194	0.129977	4.07	24.85	0.389	95.85	4.4989	4.6112	3.2547	3.9091
SLC39A10	NM_020342.1	5960332	2	196310268	-0.972	0.509799	-3.52	0.00318	0.113691	6.45	80.225	0.358	95.044	6.708	7.1609	5.8517	6.0722
FNBP1L	NM_001024948.1	4560092	1	93792567	-0.972	0.509799	-3.38	0.004259	0.13122	7.83	88.842	0.389	95.852	7.9853	8.6504	7.3177	7.3742
KCTD6	NM_153331.2	5290193	3	58463014	-0.971	0.510152	-3.56	0.002965	0.109223	8.02	89.814	0.348	94.77	8.3633	8.6447	7.3559	7.7098
	AA450153	1440601	1	168899724	-0.971	0.510152	-3.42	0.003892	0.124706	4.11	28.839	0.378	95.558	4.8517	4.3393	3.7954	3.453
FSTL3	NM_005860.2	2360356	19	634134	-0.971	0.510152	-2.93	0.010597	0.204983	6.41	79.931	0.522	97.881	7.4478	6.339	5.9825	5.862
ZFATAS	NR_002438.1	630131	8	135610794	-0.97	0.510506	-3.21	0.005961	0.155716	3.58	1.052	0.429	96.631	3.8208	4.3027	3.4307	2.7524
BOLL	NM_033030.3	4920703	2	198358096	-0.969	0.51086	-3.58	0.002839	0.106489	4.06	23.883	0.341	94.48	4.5552	4.5275	3.7767	3.3688
ASPH	NM_004318.2	5890619	8	62756092	-0.968	0.511214	-3.72	0.002138	0.089912	6.84	82.91	0.313	93.394	7.3103	7.33	6.3212	6.3839
KRT6A	NM_005554.3	3830681	12	52881048	-0.967	0.511569	-3.66	0.002393	0.096917	4.21	37.78	0.323	93.767	4.8087	4.5777	3.6733	3.7783
TMEM123	NM_052932.2	4610102	11	102267762	-0.967	0.511569	-3.55	0.002994	0.109709	9.15	94.576	0.344	94.631	9.474	9.7931	8.5145	8.8177
	BC038580	5490592	2	75023173	-0.967	0.511569	-3.48	0.003439	0.118646	4.15	32.794	0.358	95.073	4.8517	4.4208	3.5166	3.8215
ANK3	NM_020987.2	2630600	10	61829668	-0.967	0.511569	-3.48	0.003483	0.119401	4.06	24.075	0.36	95.113	4.6739	4.413	3.3416	3.8105
RBPMS	NM_001008710.1	1240291	8	30242609	-0.966	0.511923	-3.61	0.002649	0.102729	4.49	56.118	0.33	94.065	5.0791	4.8632	4.1361	3.8743
CENTB2	NM_012287.3	60746	3	196477153	-0.966	0.511923	-3.54	0.003048	0.110525	6.45	80.248	0.344	94.601	6.8575	7.0099	5.7595	6.1764
MALT1	NM_006785.2	6040408	18	54567787	-0.965	0.512278	-3.69	0.00226	0.093018	4.6	60.138	0.314	93.437	5.16	5.0121	4.1133	4.1293
SMAD5	NM_005903.5	7560367	5	135517986	-0.965	0.512278	-3.66	0.002401	0.097099	8.37	91.582	0.32	93.65	8.7358	8.9732	7.8743	7.9042
VCL	NM_014000.2	70592	10	75549682	-0.965	0.512278	-3.64	0.002494	0.099	10.62	97.87	0.323	93.788	11.2025	11.0046	10.2353	10.042
SLC25A43	NM_145305.1	3130746	X	118471776	-0.965	0.512278	-3.63	0.002566	0.100687	5.17	69.6	0.325	93.887	5.6199	5.6863	4.8361	4.5409
E2F3	NM_001949.2	3930059	6	20601815	-0.965	0.512278	-3.55	0.002972	0.109422	8.42	91.796	0.341	94.485	8.8519	8.956	8.1443	7.7329
STRN3	NM_014574.3	1570575	14	31363891	-0.965	0.512278	-3.35	0.004513	0.135713	7.24	85.338	0.386	95.768	7.4501	7.988	6.956	6.5517
TRAF5	NM_004619.3	7610598	1	209614651	-0.965	0.512278	-3.33	0.004658	0.138457	6.01	77.093	0.389	95.861	6.3198	6.6621	5.2271	5.8249
LOC100129443	XM_001726215.1	6110278			-0.965	0.512278	-3.27	0.005312	0.147392	4.1	27.96	0.405	96.174	4.9437	4.2216	3.729	3.5071
LOC388915	NM_001010902.1	7380364	22	46916258	-0.964	0.512634	-2.85	0.012472	0.220054	3.55	0.779	0.54	98.052	3.7181	4.3393	3.5633	2.5663
ROD1	NM_005156.4	6200128	9	114021007	-0.963	0.512989	-3.46	0.003603	0.121383	9.05	94.288	0.357	95.012	9.4323	9.6381	8.3246	8.8202
WWTR1	NM_015472.3	1110730	3	150721022	-0.963	0.512989	-3.43	0.003846	0.124178	4.93	66.704	0.365	95.221	5.3792	5.4385	4.7324	4.1591
KLHL28	NM_017658.3	7330575	14	45398316	-0.963	0.512989	-3.36	0.004406	0.134095	6.73	82.171	0.38	95.615	6.9006	7.5161	6.1385	6.3524
RLF	NM_012421.2	520309			-0.963	0.512989	-3.09	0.007618	0.174308	6.49	80.494	0.454	97.082	6.7325	7.2007	6.4053	5.6011
SGCB	NM_000232.3	1190162	4	52582042	-0.962	0.513345	-3.64	0.002487	0.098924	5.74	75.027	0.319	93.6	6.3285	6.1105	5.318	5.1973
DICER1	NM_030621.2	5130091	14	94623147	-0.962	0.513345	-3.44	0.003754	0.12327	6.93	83.481	0.36	95.12	7.3418	7.4811	6.1801	6.7192
ITPRIP	NM_033397.2	2970347	10	106072438	-0.962	0.513345	-3.39	0.004164	0.129389	6.58	81.144	0.372	95.427	6.7664	7.3577	6.0099	6.1896
C14orf43	NM_194278.3	5560154	14	74226547	-0.962	0.513345	-3.36	0.004412	0.134095	3.83	7.125	0.379	95.583	4.1685	4.4473	3.639	3.0523
PLS1	NM_002670.1	6330187	3	143914775	-0.961	0.513701	-3.26	0.005447	0.148902	7.97	89.556	0.404	96.144	8.0741	8.8277	7.4519	7.5269
LOC646888	XM_929851.1	1110097	6	37612179	-0.959	0.514413	-3.58	0.002812	0.106	3.95	14.49	0.327	93.947	4.4559	4.3983	3.2966	3.639
IDH3G	NM_174869.1	1090136	X	153051498	-0.959	0.514413	-3.5	0.003334	0.116639	4.48	55.889	0.344	94.609	5.197	4.7259	3.9878	4.0164
MRPL3	NM_007208.2	2710192	3	132664237	-0.959	0.514413	-3.48	0.003444	0.118646	10.85	98.16	0.347	94.717	11.3635	11.2854	10.123	10.608
DCBLD2	NM_080927.3	830661	3	99997665	-0.959	0.514413	-3.33	0.004739	0.139726	10.47	97.648	0.382	95.672	10.6275	11.2784	9.9058	10.0827
TRIM5	NM_033034.1	1660010	11	5685610	-0.958	0.51477	-3.48	0.003438	0.118646	6.07	77.515	0.345	94.641	6.7728	6.3153	5.508	5.665
TAP2	NM_000544.3	3940477	6	32901537	-0.957	0.515127	-3.65	0.002444	0.097915	6.26	78.965	0.311	93.297	6.7664	6.7201	5.873	5.6993
OLFM1	NM_014279.4	2680072	9	137152718	-0.957	0.515127	-3.62	0.00262	0.101941	4.87	65.885	0.317	93.513	5.3163	5.3828	4.5203	4.2652
C1orf41	NM_016126.1	6450273	1	54178340	-0.957	0.515127	-3.33	0.004718	0.139352	7.85	88.897	0.379	95.59	7.9943	8.6543	7.3247	7.41
MCM6	NM_005915.4	5690274	2	136598167	-0.956	0.515484	-3.44	0.003732	0.123013	9.69	96.077	0.352	94.866	9.9032	10.433	9.2106	9.2128
TERC	NR_001566.1	3420678	3	170965371	-0.956	0.515484	-3.04	0.008521	0.183679	5.41	71.942	0.458	97.142	6.2277	5.5426	5.2664	4.5927
DKFZp686E2433	XM_293828.6	2350646			-0.956	0.515484	-2.56	0.021924	0.277913	4.13	31.202	0.653	98.816	4.6739	4.5511	4.3778	2.9362
MIR183	NR_029615.1	1260750			-0.955	0.515842	-3.62	0.002595	0.101369	3.73	3.714	0.314	93.42	4.2047	4.2138	3.3734	3.1349
SMAD7	NM_005904.2	4220767	18	46446794	-0.955	0.515842	-3.46	0.00363	0.121856	4.94	66.84	0.346	94.694	5.1649	5.6666	4.4369	4.4855
FAM160B1	NM_001135051.1	5310711	10	116620577	-0.954	0.516199	-3.51	0.003245	0.11499	5.15	69.298	0.333	94.199	5.4424	5.8029	4.7818	4.5558
	AA814136	6560408	5	90637646	-0.953	0.516557	-3.55	0.003029	0.110488	4.33	47.009	0.326	93.892	4.8586	4.747	3.6733	4.026
ZFP28	NM_020828.1	3130202	19	57067690	-0.953	0.516557	-3.26	0.005374	0.148175	3.89	10.425	0.389	95.854	4.015	4.7164	3.3311	3.4943
PROCR	NM_006404.3	290181	20	33228539	-0.95	0.517632	-3.47	0.003546	0.120131	7.33	85.931	0.338	94.374	8.0099	7.5949	6.9607	6.7436
MCM4	NM_005914.2	6020170	8	48889351	-0.95	0.517632	-3.3	0.004938	0.141881	7.33	85.916	0.375	95.471	7.5897	8.01	6.5921	7.1071
ALG13	NM_018466.2	730520	X	110818548	-0.95	0.517632	-3.27	0.005305	0.147392	5.17	69.664	0.383	95.7	5.7585	5.5426	5.0348	4.3662
DIRC2	NM_032839.1	2370128	3	124081121	-0.949	0.517991	-3.65	0.002474	0.098696	7.04	84.205	0.301	92.869	7.4851	7.5514	6.5607	6.5779
CHEK2	NM_007194.3	7380376	22	29107963	-0.949	0.517991	-3.64	0.002492	0.098974	6.63	81.531	0.302	92.905	7.1183	7.099	6.1152	6.2044
DEF8	NM_017702.2	3130010	16	88551557	-0.949	0.517991	-3.55	0.002988	0.109709	8.42	91.81	0.319	93.619	8.9811	8.8161	7.8036	8.0949
	AK172857	6770487	8	64292927	-0.949	0.517991	-3.44	0.003782	0.123413	5.2	69.907	0.343	94.571	5.5839	5.7588	4.9589	4.4855
ZNF599	NM_001007247.1	6420059	19	39955092	-0.949	0.517991	-3.02	0.008842	0.186763	3.86	8.662	0.454	97.087	4.1588	4.5068	3.8305	2.9362
HEATR7A	NM_001099281.1	450441	8	145267925	-0.947	0.51871	-3.54	0.003049	0.110525	5.16	69.512	0.318	93.576	5.8054	5.4707	4.6651	4.7164
LOC100133881	XM_001716307.1	3450246			-0.947	0.51871	-3.52	0.003165	0.113591	4.32	46.285	0.322	93.729	4.9732	4.6063	3.8635	3.8215
ATP2B4	NM_001001396.1	6100482	1	201979201	-0.946	0.51907	-3.31	0.004937	0.141881	6.29	79.118	0.369	95.323	6.6334	6.8882	5.5161	6.113
VCL	NM_003373.3	2900068	10	75548445	-0.946	0.51907	-3.28	0.005194	0.145681	6.66	81.732	0.374	95.456	7.4443	6.8206	6.0584	6.3152
SPAG1	NM_172218.1	6130601	8	101247224	-0.945	0.51943	-3.56	0.002948	0.108951	5.12	68.98	0.312	93.373	5.6828	5.496	4.5301	4.758
CUL4B	NM_001079872.1	1300220	X	119658701	-0.945	0.51943	-3.51	0.003271	0.115551	5.86	75.94	0.323	93.763	6.1468	6.5114	5.4445	5.3229
WFDC3	NM_080614.1	1240746	20	44404090	-0.945	0.51943	-3.51	0.003287	0.115846	5.67	74.369	0.323	93.775	6.322	5.9616	5.125	5.2679
LOC648044	XM_001131322.1	7380520	19	12659864	-0.945	0.51943	-3.38	0.004238	0.130837	3.97	16.252	0.349	94.779	4.6451	4.2382	3.3086	3.6855
ZAK	NM_016653.1	4830279	2	173840775	-0.944	0.51979	-3.6	0.002718	0.104118	4.36	48.896	0.304	92.983	4.9125	4.7422	3.8376	3.9281
	BX114970	1570091	3	162498085	-0.944	0.51979	-3.26	0.005414	0.14854	3.73	3.737	0.376	95.507	4.3202	4.0882	3.585	2.9362
DEFA1	NM_004084.2	4540239	8	6837554	-0.944	0.51979	-3.08	0.007852	0.17697	3.63	1.582	0.427	96.583	3.7669	4.4341	3.4452	2.8682
SH2D4A	NM_022071.2	2680372	8	19252352	-0.942	0.520511	-3.36	0.004438	0.13418	6.1	77.822	0.349	94.802	6.7197	6.4277	5.3879	5.8763
LOC651212	XM_944549.1	5690195			-0.942	0.520511	-3.29	0.005049	0.143755	4.84	65.266	0.365	95.247	5.6006	5.015	4.501	4.2305
MAPKSP1	NM_021970.3	6580475	4	100800223	-0.941	0.520872	-3.36	0.004452	0.134433	4.45	54.159	0.349	94.796	4.8719	4.9626	4.2571	3.6949
S100G	NM_004057.2	5490392	X	16579101	-0.941	0.520872	-2.56	0.021993	0.278264	3.33	0.091	0.624	98.662	4.1956	3.3987	2.2774	3.435
CACNA1G	NM_198376.1	3940131	17	46038281	-0.941	0.520872	-2.54	0.023136	0.285663	3.79	5.706	0.637	98.74	4.4396	4.0882	4.0177	2.6289
PTPLAD1	NM_016395.2	6420349	15	63643684	-0.94	0.521233	-3.61	0.002681	0.10343	8.37	91.561	0.297	92.662	8.8773	8.7957	7.8608	7.9317
C15orf23	NM_033286.1	2340528	15	38469412	-0.939	0.521594	-3.55	0.002986	0.109709	6.81	82.774	0.305	93.06	7.2745	7.2872	6.2124	6.4709
CENPI	NM_006733.2	6250451	X	100287847	-0.939	0.521594	-3.15	0.006772	0.165288	4.41	51.879	0.399	96.043	4.9596	4.79	4.3221	3.5489
AGBL3	NM_178563.1	2350059	7	134451003	-0.939	0.521594	-2.3	0.036708	0.350185	3.93	12.958	0.779	99.21	4.5693	4.2216	2.6211	4.2918
FBLN1	NM_001996.2	580739	22	44337731	-0.938	0.521956	-3.46	0.003608	0.121383	6.43	80.098	0.322	93.746	6.9657	6.8347	5.7645	6.1599
LONRF1	NM_152271.3	5050768	8	12624299	-0.938	0.521956	-3.27	0.005352	0.147821	5.81	75.586	0.366	95.257	5.9529	6.6069	5.2966	5.3877
	BI024234	4200753			-0.938	0.521956	-3.18	0.006349	0.160867	6.32	79.336	0.388	95.825	6.757	6.8199	6.2259	5.4744
C5orf34	NM_198566.1	770102	5	43526511	-0.938	0.521956	-2.84	0.012695	0.221759	5.69	74.546	0.496	97.652	5.8086	6.5091	4.7943	5.648
MCM10	NM_018518.3	7570181	10	13252902	-0.938	0.521956	-2.72	0.01608	0.246602	7.61	87.623	0.545	98.097	7.6184	8.5381	6.7325	7.5471
P2RY2	NM_002564.2	4150408	11	72624553	-0.937	0.522318	-3.37	0.004336	0.13271	5.63	74.085	0.341	94.499	6.2362	5.9717	4.9333	5.3999
PTTG1	NM_004219.2	1510291	5	159787441	-0.937	0.522318	-3.31	0.004846	0.140681	10.52	97.722	0.354	94.919	10.6867	11.2871	10.0216	10.0773
MBLAC2	NM_203406.1	7380463	5	89790180	-0.936	0.52268	-3.45	0.003654	0.122126	5.11	68.938	0.321	93.701	5.6115	5.5457	4.8481	4.4363
CLDN3	NM_001306.2	20546	7	72821281	-0.936	0.52268	-3.4	0.004034	0.127204	5.58	73.551	0.332	94.125	5.8169	6.2722	5.1931	5.0232
MEF2A	NM_001130927.1	7510184	15	100252649	-0.936	0.52268	-3.4	0.004043	0.127245	3.98	16.811	0.331	94.103	4.6664	4.2216	3.6047	3.4114
LOC100130440	XM_001713816.1	2850739			-0.936	0.52268	-2.95	0.01012	0.200416	3.88	9.602	0.454	97.08	4.3546	4.3321	3.8994	2.9152
GRB2	NM_002086.3	7380725	17	70833600	-0.935	0.523042	-3.57	0.002887	0.107536	6.5	80.585	0.296	92.592	6.9383	6.9888	5.9493	6.1088
KLHL17	NM_198317.1	3850504	1	890601	-0.935	0.523042	-3.44	0.003735	0.123013	6.28	79.09	0.321	93.695	6.9105	6.5907	5.9551	5.6766
LOC642678	XM_926130.1	2350121	2	91249727	-0.935	0.523042	-3.37	0.004311	0.132207	4.15	32.892	0.337	94.33	4.844	4.3983	3.551	3.8215
ZNF771	NM_016643.1	3840278	16	30338176	-0.935	0.523042	-3.28	0.005164	0.145175	4.46	55.07	0.357	95.016	4.844	5.019	4.2985	3.6949
USP12	NM_182488.1	2360521	13	26540766	-0.935	0.523042	-3.11	0.007396	0.172975	5.32	71.089	0.404	96.155	5.7224	5.8483	5.2565	4.444
HNRNPC	NM_001077442.1	5670487	14	21677424	-0.934	0.523405	-3.59	0.002782	0.105386	7.56	87.335	0.292	92.336	8.033	8.0293	7.1343	7.0598
TAGLN2	NM_003564.1	2340180	1	159888402	-0.934	0.523405	-3.56	0.002941	0.108854	6.26	78.967	0.297	92.687	6.677	6.7874	5.7197	5.8763
RNF148	NM_198085.1	2450241	7	122341916	-0.933	0.523768	-3.53	0.003119	0.112436	4.42	52.809	0.301	92.886	5.0143	4.7623	3.9306	3.9795
SOX18	NM_018419.2	6100433	20	62679220	-0.933	0.523768	-3.51	0.00323	0.114749	6.57	81.065	0.304	92.992	6.9084	7.1593	6.031	6.1716
PVRL3	NM_015480.1	4850500	3	110852498	-0.933	0.523768	-3.47	0.003552	0.120218	6.4	79.844	0.314	93.443	6.8027	6.9238	5.751	6.1088
TGIF1	NM_170695.2	3140369	18	3447640	-0.933	0.523768	-3.28	0.005183	0.145444	8.38	91.639	0.355	94.948	9.1006	8.602	7.7311	8.1054
LOC653733	XM_929313.1	6060110	1	74280141	-0.932	0.524131	-3.32	0.004745	0.139734	3.8	6.043	0.343	94.573	4.3719	4.1652	3.0733	3.6004
TNNC1	NM_003280.1	2850768	3	52460296	-0.932	0.524131	-3.12	0.007175	0.170898	5.2	69.939	0.395	95.979	6.0645	5.2692	4.7253	4.7444
LOC100133565	XM_001724542.1	5340279			-0.932	0.524131	-2.7	0.016754	0.249876	7.85	88.925	0.541	98.071	8.7896	7.8464	7.7807	6.992
PTGER2	NM_000956.2	5900471	14	51864520	-0.931	0.524495	-3.5	0.003311	0.116267	4.08	26.241	0.305	93.038	4.5693	4.5275	3.7677	3.4662
RBM12B	NM_203390.2	450132	8	94813467	-0.93	0.524858	-3.52	0.00317	0.1136	6.25	78.832	0.298	92.744	6.6046	6.8164	5.8432	5.718
GABPA	NM_002040.2	270053	21	26065252	-0.93	0.524858	-3.22	0.005828	0.153774	5.52	73.041	0.365	95.23	5.6733	6.2975	4.9241	5.1867
GNG12	NM_018841.4	5890025	1	68169321	-0.929	0.525222	-3.4	0.004046	0.127245	5.9	76.285	0.322	93.737	6.5165	6.2121	5.6022	5.2679
	BX112872	7380326	20	51578926	-0.929	0.525222	-3.08	0.007825	0.176904	4.06	24.107	0.403	96.132	4.6589	4.3903	3.2023	3.9886
SPINK9	NM_001040433.1	2630142	5	147695321	-0.929	0.525222	-2.11	0.052778	0.401601	3.71	3.157	0.908	99.49	3.971	4.3772	2.3023	4.1877
ZDHHC17	NM_015336.2	5890047	12	75771132	-0.928	0.525586	-3.22	0.005878	0.154332	6.67	81.794	0.363	95.187	6.8042	7.4641	6.1327	6.2788
LOC644739	XM_933679.1	6770181	X	47547558	-0.927	0.525951	-3.55	0.003006	0.10981	4.1	28.115	0.289	92.147	4.5301	4.601	3.6914	3.5866
MIR224	NR_029638.1	1710128			-0.927	0.525951	-2.48	0.025885	0.302548	3.44	0.296	0.639	98.755	3.4725	4.3321	2.3891	3.5625
LRG1	NM_052972.2	6660162	19	4537310	-0.925	0.526681	-3.54	0.003066	0.110838	4.83	65.099	0.289	92.141	5.3517	5.2305	4.3268	4.4051
MAP2K4	NM_003010.2	2680047	17	11986853	-0.925	0.526681	-3.52	0.00317	0.1136	8.38	91.628	0.291	92.297	8.9404	8.7515	7.9431	7.8995
	BG216851	580167			-0.925	0.526681	-3.49	0.003362	0.117188	3.91	12.009	0.298	92.725	4.2838	4.4679	3.551	3.35
STAMBPL1	NM_020799.2	7150059	10	90664362	-0.925	0.526681	-3.42	0.003908	0.124879	8.07	90.091	0.313	93.398	8.5113	8.5554	7.4063	7.8096
GNG4	NM_001098721.1	4050671	1	235714386	-0.925	0.526681	-3.33	0.004676	0.138541	6.14	78.072	0.332	94.146	6.5165	6.6809	5.4221	5.9246
SKP1	NM_006930.3	2940369	5	133492119	-0.924	0.527046	-3.54	0.003064	0.110838	6.91	83.373	0.287	92.022	7.3743	7.3764	6.5117	6.3915
MIR509-2	NR_030586.1	1710360			-0.924	0.527046	-3.5	0.003297	0.115954	3.74	3.951	0.294	92.465	4.2047	4.1983	3.1583	3.3967
LNX1	NM_032622.1	3460593	4	54020655	-0.924	0.527046	-3.36	0.004427	0.134128	3.77	4.808	0.325	93.856	4.2047	4.2558	3.0628	3.5489
LOC100131810	XR_039079.1	6940411			-0.924	0.527046	-3.25	0.005528	0.150057	6.83	82.88	0.349	94.798	7.5823	6.9993	6.4776	6.256
MIR26A1	NR_029499.1	840458			-0.923	0.527411	-3.4	0.00407	0.127559	3.53	0.663	0.314	93.426	4.015	3.9703	2.8597	3.2797
LOC285941	XM_379477.3	2320538	7	26645379	-0.923	0.527411	-3.27	0.005293	0.147315	4.24	40.215	0.342	94.552	4.7038	4.6952	3.4803	4.0732
CLCF1	NM_013246.2	5290397	11	67131876	-0.923	0.527411	-3.24	0.00562	0.151177	5.32	71.138	0.35	94.804	5.82	5.7507	4.5506	5.1747
SDCBP	NM_001007067.1	630167	8	59490682	-0.923	0.527411	-3.14	0.006947	0.167927	7.52	87.074	0.377	95.539	8.0391	7.9309	6.6926	7.4313
LOC440995	XM_942874.2	6980450			-0.923	0.527411	-2.38	0.031177	0.327688	3.56	0.904	0.688	98.95	3.9409	4.1057	3.8734	2.3265
CPEB3	NM_014912.3	3610386	10	93811150	-0.922	0.527777	-3.54	0.00304	0.110508	5.76	75.188	0.283	91.825	6.2213	6.2145	5.3115	5.2809
DDR1	NM_013993.2	3710196	6	30867583	-0.922	0.527777	-3.22	0.005847	0.153986	8.48	92.048	0.354	94.921	9.2466	8.6414	7.9049	8.1385
CDKN2B	NM_078487.2	1500338	9	22008693	-0.922	0.527777	-3.14	0.006916	0.167432	4.05	23.358	0.375	95.49	4.8792	4.1476	3.5307	3.6514
KCTD6	NM_153331.2	5130168	3	58462516	-0.922	0.527777	-3.11	0.007349	0.172803	6.68	81.83	0.383	95.698	7.1401	7.1362	5.8295	6.6025
KISS1R	NM_032551.3	4120131	19	871774	-0.922	0.527777	-2.83	0.012791	0.222626	6.03	77.25	0.47	97.311	6.1716	6.8082	5.1452	5.9909
CGRRF1	NM_006568.2	1940561	14	54074683	-0.921	0.528143	-3.54	0.003064	0.110838	7.26	85.52	0.283	91.819	7.7138	7.7366	6.827	6.7813
ZNF800	NM_176814.3	7150682	7	127010642	-0.921	0.528143	-3.34	0.004574	0.136983	6.96	83.665	0.324	93.824	7.2191	7.6199	6.6439	6.3524
USP1	NM_003368.4	3400008	1	62675306	-0.921	0.528143	-2.9	0.011125	0.209834	4.35	48.654	0.444	96.913	4.7663	4.8586	3.4016	4.3812
NUDCD1	NM_032869.2	3360139	8	110322490	-0.921	0.528143	-2.85	0.012402	0.219609	5.49	72.785	0.463	97.209	5.8968	6.0124	4.5162	5.5504
POLA1	NM_016937.2	5810253	X	24749535	-0.921	0.528143	-2.57	0.021634	0.276096	6.79	82.611	0.579	98.37	6.7488	7.7477	5.8851	6.7701
	BX103855	2350692	9	2770159	-0.921	0.528143	-2.31	0.035715	0.346236	3.91	11.867	0.727	99.092	4.1588	4.5838	4.2388	2.6623
MIR891A	NR_030581.1	2970202			-0.92	0.528509	-3.47	0.003553	0.120218	4.19	36.182	0.296	92.594	4.5219	4.7763	3.7954	3.6629
PPM1B	NM_002706.4	6520739	2	44289894	-0.92	0.528509	-3.38	0.004254	0.13122	5.04	68.082	0.314	93.434	5.2791	5.7165	4.5783	4.5777
LOC646723	XR_017241.1	6580270	5	36921862	-0.92	0.528509	-3.35	0.004501	0.135568	11.71	99.005	0.32	93.646	11.9489	12.3801	11.1421	11.3471
MAGEC3	NM_138702.1	4120220	X	140810958	-0.92	0.528509	-2.99	0.009397	0.192795	3.62	1.527	0.415	96.388	4.2838	3.8824	2.7638	3.5625
ANXA2P3	NR_001446.2	2810411	10	66256423	-0.919	0.528875	-3.17	0.006489	0.162839	6	77.021	0.361	95.145	6.6276	6.2824	5.8366	5.2361
GNB5	NM_006578.3	2230408	15	52414236	-0.918	0.529242	-3.49	0.003419	0.118486	6	77.045	0.289	92.173	6.5484	6.3698	5.4735	5.6091
MIR802	NR_030414.1	6520193			-0.918	0.529242	-3.34	0.004582	0.137063	3.75	4.22	0.319	93.627	4.3107	4.1057	3.0733	3.5071
CBX5	NM_012117.1	7150685	12	52937613	-0.918	0.529242	-3.19	0.006244	0.159336	7.35	86.056	0.356	94.976	7.7175	7.8979	6.5669	7.212
DCTPP1	NM_024096.1	7650435	16	30435243	-0.917	0.529609	-3.44	0.003784	0.123413	9.8	96.308	0.298	92.751	10.3196	10.1962	9.1885	9.4926
C2orf56	NM_144736.4	730136	2	37322378	-0.917	0.529609	-3.43	0.003845	0.124178	5.46	72.516	0.299	92.776	6.0817	5.7588	4.9549	5.0525
KRT84	NM_033045.3	270142	12	52771644	-0.917	0.529609	-3.42	0.003916	0.125046	4.41	52.156	0.301	92.899	4.7594	4.9782	3.8112	4.0924
LOC646262	XM_929207.1	730095	1	23171852	-0.917	0.529609	-2.67	0.01775	0.254932	4.13	31.242	0.527	97.938	4.4559	4.732	4.2689	3.0844
LOC647954	XR_018676.1	6420674			-0.916	0.529976	-3.38	0.004264	0.131249	8.56	92.361	0.309	93.214	9.2068	8.8312	8.1946	8.0114
C3orf35	NM_178344.1	5360348	3	37402819	-0.916	0.529976	-2.9	0.011205	0.210352	4.07	25.214	0.437	96.797	4.6078	4.4539	4.0945	3.1349
C7orf43	NM_018275.3	510255	7	99752277	-0.916	0.529976	-2.79	0.013973	0.230793	6.92	83.39	0.477	97.411	7.864	6.8865	6.6965	6.2213
LOC619207	XM_927516.1	6110370	10	135128405	-0.916	0.529976	-2.63	0.019245	0.263645	3.97	16.053	0.542	98.073	4.0924	4.7576	4.0415	2.9769
MMP9	NM_004994.2	3180528	20	44078320	-0.914	0.530712	-3.49	0.003386	0.117689	5.21	70.045	0.283	91.827	5.7126	5.6204	4.8238	4.6809
KLC3	NM_177417.1	2340500	19	50546060	-0.914	0.530712	-3.38	0.004214	0.130255	6.15	78.235	0.305	93.058	6.7407	6.4799	5.8471	5.545
AGPAT9	NM_032717.3	2060477	4	84526603	-0.914	0.530712	-3.32	0.004773	0.140107	7.02	84.07	0.318	93.54	7.4303	7.5237	6.8017	6.325
AAK1	NM_014911.3	1170332	2	69692089	-0.914	0.530712	-2.85	0.012447	0.219856	4.36	49.086	0.452	97.053	5.1028	4.5275	4.3221	3.4798
LOC100129717	XM_001722854.1	110131			-0.914	0.530712	-2.44	0.028139	0.313434	3.51	0.563	0.635	98.732	3.7992	4.1394	2.3439	3.7677
41338	NM_017824.4	1300059	10	94102520	-0.913	0.53108	-3.5	0.003301	0.116014	7.04	84.171	0.28	91.605	7.4424	7.5458	6.5704	6.591
LOC731314	XM_001129173.1	4120538			-0.913	0.53108	-3.37	0.004363	0.133384	8.78	93.271	0.308	93.174	9.4336	9.0405	8.2479	8.3993
	BX094911	4670692	4	13853402	-0.913	0.53108	-2.22	0.042993	0.373961	4.15	32.227	0.777	99.202	4.4473	4.7576	2.8386	4.5409
BIN1	NM_139343.1	650553	2	127805917	-0.912	0.531448	-3.5	0.003314	0.116267	7.62	87.665	0.278	91.47	8.0984	8.0512	7.1369	7.1897
MRPS35	NM_021821.2	7380270	12	27799819	-0.912	0.531448	-3.48	0.003442	0.118646	9.17	94.629	0.282	91.719	9.7089	9.5479	8.6995	8.7339
AHCTF1	NM_015446.3	1230196	1	245069444	-0.912	0.531448	-3.48	0.003469	0.119151	7.8	88.652	0.282	91.745	8.168	8.3433	7.3412	7.3472
MGC40489	XR_016048.1	70554	17	60176197	-0.912	0.531448	-3.42	0.003935	0.125336	5.41	72.037	0.296	92.581	5.9529	5.7882	5.1009	4.8154
	AK022936	5550768	14	53960082	-0.912	0.531448	-3.4	0.004091	0.127784	8.35	91.501	0.299	92.772	8.6808	8.9352	7.7687	8.0236
PTER	NM_030664.3	6130382	10	16555402	-0.912	0.531448	-3.28	0.005223	0.146391	6.09	77.682	0.325	93.862	6.4315	6.6515	5.3858	5.874
LAMP3	NM_014398.2	7320546	3	184322979	-0.912	0.531448	-3.26	0.00542	0.148547	6.09	77.716	0.33	94.048	6.267	6.8288	5.6356	5.6356
ASPM	NM_018136.3	6130441	1	195320084	-0.911	0.531816	-3.16	0.006643	0.16402	8.04	89.968	0.352	94.88	8.2852	8.7159	7.3308	7.8492
CALHM3	NM_001129742.1	5720463	10	105232797	-0.91	0.532185	-3.44	0.003779	0.123413	5.26	70.555	0.289	92.156	5.8353	5.5954	4.8724	4.7374
EMILIN2	NM_032048.2	1190142	18	2891292	-0.91	0.532185	-3.4	0.004034	0.127204	7.93	89.325	0.294	92.488	8.2318	8.5295	7.3962	7.5458
CD47	NM_198793.2	4150193	3	109245076	-0.91	0.532185	-3.24	0.005631	0.151177	6.8	82.725	0.331	94.08	7.061	7.4583	6.1434	6.5566
LOC650556	XM_939643.1	3800615			-0.91	0.532185	-2.79	0.014105	0.232118	4.39	51.286	0.468	97.273	5.3656	4.3321	3.7954	4.0817
GHDC	NM_032484.3	2030754	17	37594936	-0.909	0.532554	-3.3	0.004963	0.14226	6.2	78.508	0.316	93.479	6.8955	6.407	5.7616	5.7225
LOC389662	XR_016813.2	4760544	8	57551961	-0.909	0.532554	-3.26	0.005452	0.148902	5.05	68.184	0.326	93.915	5.2458	5.7588	4.6933	4.493
SGK	NM_005627.2	4390450	6	134532365	-0.909	0.532554	-2.99	0.009264	0.191897	7.21	85.124	0.395	95.988	7.9479	7.3719	7.0624	6.4397
SCARA3	NM_016240.2	6420630	8	27530318	-0.908	0.532923	-3.47	0.003511	0.119679	5.21	70.049	0.279	91.556	5.6828	5.6447	4.6809	4.83
NUP54	NM_017426.2	6940201	4	77255448	-0.908	0.532923	-3.42	0.003933	0.125336	7.35	86.098	0.29	92.223	7.6595	7.9554	6.8751	6.9231
PLEK2	NM_016445.1	5270148	14	67854059	-0.908	0.532923	-3.39	0.004114	0.128332	8.35	91.484	0.294	92.471	8.8633	8.7409	7.7351	8.0528
	BC014384	1980088	4	41657021	-0.908	0.532923	-3.2	0.006145	0.157858	7.93	89.333	0.339	94.436	8.0899	8.6722	7.3681	7.5778
BAD	NM_032989.1	3520553	11	63808680	-0.907	0.533293	-3.48	0.003484	0.119401	5.28	70.718	0.276	91.379	5.7196	5.7465	4.8812	4.7711
LOC651017	XM_940129.1	1450538			-0.907	0.533293	-3.41	0.004006	0.1268	3.85	8.202	0.291	92.253	4.2752	4.3321	3.2436	3.5489
LOC643918	XM_933328.1	4070129	18	35585293	-0.907	0.533293	-3.4	0.004066	0.12752	5.24	70.375	0.291	92.304	5.6697	5.7196	4.6292	4.9464
RNASE4	NM_194431.1	6590041	14	20238251	-0.907	0.533293	-3.38	0.004198	0.129977	6.31	79.27	0.294	92.477	6.675	6.8516	6.0069	5.7063
TCEA1	NM_006756.2	5960286	8	55063372	-0.907	0.533293	-3.12	0.007229	0.171484	4.84	65.423	0.357	95.024	5.1925	5.4051	4.7289	4.0552
RCADH5	XM_001717469.1	5490440			-0.906	0.533663	-3.48	0.003461	0.119046	5.86	75.982	0.275	91.271	6.2806	6.3476	5.3879	5.4278
LASS2	NM_181746.2	6380154	1	150938029	-0.905	0.534033	-3.26	0.00546	0.148902	7.95	89.456	0.32	93.655	8.3351	8.4764	7.7575	7.2441
TWSG1	NM_020648.3	940041	18	9391956	-0.905	0.534033	-3.1	0.007515	0.17392	8.24	90.928	0.359	95.094	8.4737	8.9027	7.4944	8.0727
COQ10A	NM_144576.3	2630008	12	54950772	-0.904	0.534403	-3.46	0.003579	0.120993	7.18	85.029	0.274	91.254	7.6265	7.6457	6.6757	6.7894
ACSL5	NM_016234.3	7040286	10	114175087	-0.904	0.534403	-3.46	0.003638	0.122024	5.07	68.478	0.276	91.383	5.4424	5.5981	4.6156	4.6171
	BC043009	540279	10	33216672	-0.904	0.534403	-3.42	0.003882	0.124489	4.95	66.994	0.283	91.817	5.4879	5.3188	4.4056	4.5927
TMEM184B	NM_012264.3	7610369	22	38615661	-0.904	0.534403	-3.32	0.0048	0.140453	7.26	85.446	0.304	93.013	7.7816	7.6367	6.5986	7.0122
TNPO1	NM_153188.2	5080482	5	72192890	-0.903	0.534774	-3.31	0.004879	0.141016	6.35	79.539	0.304	93.022	6.943	6.6567	6.0668	5.7276
USP22	XM_042698.7	5420148	17	20887235	-0.903	0.534774	-1.9	0.07719	0.460043	3.77	4.743	1.043	99.685	4.015	4.4208	4.3719	2.2586
DIAPH3	NM_001042517.1	6560167	13	60240829	-0.902	0.535144	-3.3	0.004974	0.142303	4.93	66.685	0.305	93.072	5.3974	5.3562	4.701	4.2489
KCNS1	NM_002251.3	6620259	20	43720993	-0.902	0.535144	-3.12	0.007207	0.1713	4.2	37.046	0.35	94.838	4.7387	4.5642	3.4161	4.0817
MFAP3L	NM_021647.6	2750332	4	171163339	-0.902	0.535144	-3.02	0.008747	0.185834	4.85	65.599	0.376	95.516	5.0553	5.5545	4.0945	4.7111
ZNF654	NM_018293.2	4230524	3	88190093	-0.902	0.535144	-2.92	0.010669	0.20551	4.67	61.801	0.405	96.176	5.1332	5.1031	4.6651	3.7677
ARC	NM_015193.3	430674	8	143692829	-0.901	0.535515	-3.45	0.003661	0.122133	4.85	65.595	0.274	91.209	5.2742	5.3342	4.3446	4.4609
STX1A	NM_004603.1	4860068	7	72751878	-0.9	0.535887	-3.44	0.003719	0.123013	6.22	78.643	0.274	91.224	6.6102	6.7217	5.8131	5.718
HIVEP1	NM_002114.2	4670500	6	12164426	-0.9	0.535887	-3.35	0.004478	0.134973	5.17	69.658	0.291	92.283	5.4947	5.7533	4.8481	4.601
DALRD3	NM_018114.4	3870754	3	49058338	-0.9	0.535887	-3.29	0.005104	0.144484	3.74	4.025	0.305	93.055	4.413	3.9703	3.3547	3.2295
LOC644010	XM_938374.2	270148			-0.9	0.535887	-3.13	0.007102	0.169742	3.79	5.594	0.344	94.637	4.5693	3.9116	3.4016	3.2797
LETM2	NM_144652.1	2630408	8	38264976	-0.9	0.535887	-2.87	0.01197	0.216723	5.22	70.187	0.421	96.487	5.5871	5.7588	4.3046	5.2414
C1S	NM_201442.1	1300327	12	7039320	-0.9	0.535887	-2.78	0.014201	0.232896	3.56	0.898	0.451	97.038	3.8326	4.1884	2.6211	3.6004
CEP170	NM_014812.2	3940372	1	243362446	-0.9	0.535887	-2.45	0.027251	0.308651	4.05	22.86	0.599	98.518	4.8643	4.1299	2.9986	4.1949
	BF445323	2370133	10	90959886	-0.899	0.536258	-3.4	0.004056	0.12734	4.39	51.134	0.28	91.635	4.9437	4.7374	4.0177	3.8652
MPZL1	NM_003953.4	2490470	1	166011934	-0.899	0.536258	-3.13	0.007108	0.169742	5.19	69.859	0.344	94.597	5.3711	5.9133	4.9374	4.5486
LOC390332	XR_016754.1	3310768	12	55663551	-0.899	0.536258	-3.1	0.007424	0.172999	3.93	13.525	0.349	94.787	4.4652	4.3027	3.8208	3.1492
	BU632350	6060273	5	66599661	-0.898	0.53663	-3.43	0.003858	0.124184	3.76	4.69	0.274	91.199	4.2047	4.2216	3.4016	3.2295
FLJ22675	XM_001129697.2	780703			-0.898	0.53663	-3.42	0.003882	0.124489	4.16	33.749	0.274	91.241	4.7038	4.5203	3.7098	3.7189
LOC100132060	XM_001720144.1	4480176	2	161905457	-0.898	0.53663	-3.4	0.004058	0.12734	5.3	70.911	0.279	91.571	5.6514	5.8511	4.9272	4.7789
GAS6	NM_000820.1	70730	13	113590183	-0.898	0.53663	-3.33	0.004673	0.138541	8.28	91.129	0.293	92.431	8.5916	8.8637	7.6939	7.9653
WNT3	NM_030753.3	4070615	17	44841819	-0.898	0.53663	-3.33	0.004706	0.139266	4.86	65.792	0.294	92.454	5.3747	5.2513	4.5996	4.2305
LOC541473	NR_003602.1	4260358	7	75021489	-0.898	0.53663	-3.26	0.005355	0.147821	4.38	50.389	0.309	93.21	4.5847	5.0714	3.9409	3.9187
FOXL2	NM_023067.2	4230750	3	140146049	-0.898	0.53663	-2.54	0.02315	0.285663	3.46	0.366	0.552	98.162	4.3972	3.4307	2.5781	3.453
NPTX1	NM_002522.2	780017	17	76057281	-0.897	0.537002	-3.27	0.005309	0.147392	3.59	1.167	0.306	93.081	4.1022	3.9802	3.3734	2.9152
FABP9	NM_001080526.1	870291	8	82534030	-0.897	0.537002	-3.23	0.005762	0.152808	3.82	6.629	0.315	93.462	4.2047	4.3256	3.1099	3.6262
MIR1197	NR_031713.1	4180653			-0.897	0.537002	-3.17	0.006558	0.163274	4.2	36.923	0.33	94.067	4.6589	4.6354	3.4452	4.0552
LOC100132430	XR_038825.1	5870050			-0.897	0.537002	-2.92	0.01079	0.206496	3.85	8.359	0.399	96.056	4.5219	4.0803	3.0198	3.7888
ZNF100	NM_173531.2	1440110	19	21698109	-0.896	0.537375	-3.3	0.004938	0.141881	4.04	22.481	0.296	92.63	4.696	4.2856	3.6273	3.5625
SPAG1	NM_003114.3	2680553	8	101253578	-0.895	0.537747	-3.43	0.00382	0.123896	6.2	78.52	0.269	90.928	6.6858	6.6049	5.7074	5.7927
LOC730078	XM_001718885.1	5550059			-0.895	0.537747	-3.36	0.004422	0.134128	4.02	20.383	0.284	91.859	4.6156	4.3179	3.5166	3.6262
KLHL33	XM_001714708.1	4920500			-0.895	0.537747	-3.32	0.00478	0.140128	4.74	63.376	0.291	92.306	5.2232	5.1438	4.4759	4.1014
ARHGAP11A	NM_014783.2	990121	15	30718773	-0.895	0.537747	-3.18	0.006307	0.160164	4.98	67.358	0.323	93.78	5.2232	5.6314	4.3268	4.7374
CACYBP	NM_014412.2	5890736	1	173235841	-0.895	0.537747	-3.09	0.007587	0.174308	9.53	95.649	0.345	94.658	9.9736	9.9736	8.7363	9.4219
SNRK	NM_017719.3	2060095	3	43367511	-0.895	0.537747	-3.09	0.007615	0.174308	7.64	87.79	0.346	94.696	7.9281	8.251	7.4992	6.8901
TNFAIP1	NM_021137.3	1690681	17	23697670	-0.894	0.53812	-2.81	0.013529	0.227322	7.69	88.033	0.432	96.701	8.4295	7.8365	6.8376	7.6401
LOC100133313	XM_001718057.1	7570435	9	43055397	-0.894	0.53812	-2.45	0.027466	0.309704	4.5	56.772	0.587	98.429	5.0346	4.8677	4.7462	3.3688
RRM2	NM_001034.1	510731	2	10187637	-0.893	0.538493	-3.29	0.005118	0.14458	6.63	81.527	0.295	92.566	7.0192	7.1398	5.9839	6.39
USP45	NM_001080481.1	60274	6	99987684	-0.893	0.538493	-3.27	0.005247	0.146646	4.83	65.171	0.299	92.791	5.3342	5.222	4.1685	4.601
ZNF420	NM_144689.3	1110674	19	37620370	-0.893	0.538493	-3.08	0.007839	0.176904	3.62	1.461	0.347	94.724	4.015	4.1133	3.5166	2.8259
FAM24B	NM_152644.2	6940181	10	124609992	-0.893	0.538493	-2.75	0.015026	0.238392	6.07	77.511	0.449	96.996	6.253	6.7686	5.162	6.0746
C21orf63	NM_058187.3	3310307	21	32809248	-0.892	0.538867	-3.39	0.004144	0.129121	7.31	85.814	0.273	91.156	7.7635	7.7502	6.7581	6.9719
WFDC2	NM_080735.1	4490360	20	43541926	-0.892	0.538867	-3.33	0.004673	0.138541	3.91	12.026	0.285	91.897	4.3638	4.3546	3.639	3.2959
RPRD1B	NM_021215.3	5910392	20	36153525	-0.891	0.53924	-3.28	0.005179	0.145444	6.05	77.405	0.295	92.509	6.3094	6.6809	5.5018	5.7063
PTPN22	NM_015967.3	6580044	1	114158149	-0.891	0.53924	-3.17	0.006524	0.163014	3.71	3.206	0.321	93.691	4.3546	3.9604	3.4803	3.0523
LOC338667	XM_940053.1	4730280			-0.891	0.53924	-3.16	0.006587	0.163635	4.6	59.965	0.321	93.705	5.2133	4.8721	3.9147	4.3897
LOC100132394	XM_001713809.1	4670634	X	108184371	-0.891	0.53924	-2.34	0.033768	0.338767	9.1	94.402	0.642	98.772	10.0389	9.0424	9.2133	8.0858
S100A10	NM_002966.2	540681	1	151955580	-0.89	0.539614	-3.4	0.004043	0.127245	12.26	99.403	0.268	90.834	12.6526	12.7613	11.7635	11.8703
GPSM3	NM_022107.1	6420386	6	32266808	-0.89	0.539614	-3.19	0.006288	0.159764	4.54	58.267	0.314	93.449	4.7253	5.2513	4.1812	4.0164
LOC651404	XM_940556.1	7210601			-0.89	0.539614	-1.77	0.097743	0.501087	3.88	9.888	1.172	99.782	4.7387	3.9116	2.3439	4.526
LOC728152	XM_001133734.2	4150619			-0.889	0.539988	-3.39	0.004157	0.129302	4.08	26.324	0.27	90.934	4.4989	4.5577	3.729	3.5489
MFNG	NM_002405.2	2000438	22	37865200	-0.888	0.540363	-3.41	0.003958	0.125662	5.43	72.145	0.264	90.51	5.8536	5.8857	5.0051	4.9576
SFRS9	NM_003769.2	6420767	12	120899806	-0.888	0.540363	-3.3	0.004973	0.142303	10.75	98.027	0.286	91.959	11.0176	11.3771	10.2626	10.3566
ITGA1	NM_181501.1	460220	5	52235468	-0.888	0.540363	-3.13	0.006976	0.168452	3.62	1.499	0.324	93.826	4.2571	3.8718	2.9425	3.4114
ANG	NM_001097577.1	3890484	14	20231551	-0.887	0.540737	-3.4	0.004056	0.12734	6.2	78.506	0.264	90.559	6.6398	6.6398	5.6986	5.8069
SIRPA	NM_001040023.1	1940129	20	1868371	-0.887	0.540737	-3.36	0.004407	0.134095	8.33	91.41	0.272	91.12	8.6897	8.8648	7.9755	7.8052
LIN7C	NM_018362.2	6520010	11	27472908	-0.887	0.540737	-3.23	0.005762	0.152808	5.6	73.738	0.3	92.844	5.8115	6.2667	5.2271	5.0774
IL27RA	NM_004843.2	4250735	19	14024744	-0.887	0.540737	-3.12	0.007119	0.169821	7.78	88.529	0.326	93.907	8.4888	7.9533	7.18	7.4879
RALGDS	NM_006266.2	770349	9	135996371	-0.887	0.540737	-2.26	0.039619	0.361081	3.58	1.095	0.686	98.939	3.9306	4.1222	3.9306	2.3484
SYN1	NM_006950.2	1230240	X	47317225	-0.886	0.541112	-3.36	0.004418	0.134128	4.07	25.13	0.272	91.084	4.5623	4.4679	3.7399	3.5177
ANXA2	NM_001002857.1	770730	15	60689458	-0.886	0.541112	-3.32	0.004821	0.140645	9.46	95.48	0.279	91.586	9.9889	9.8157	8.8773	9.1562
S100A10	NM_002966.1	2490195	1	150222202	-0.886	0.541112	-3.28	0.005247	0.146646	11.75	99.056	0.288	92.126	12.0355	12.3577	11.1902	11.4316
PIWIL2	XM_001127830.1	7210470			-0.886	0.541112	-3.19	0.006262	0.159514	3.97	16.15	0.308	93.195	4.2311	4.5911	3.7199	3.3311
FEN1	NM_004111.4	3370703	11	61321035	-0.886	0.541112	-2.72	0.015999	0.246247	9.8	96.312	0.449	97.008	9.9832	10.5051	8.896	9.8199
LOC648399	XM_937448.1	6280521			-0.885	0.541488	-3.37	0.004304	0.132167	6.62	81.432	0.267	90.729	7.1421	6.9818	6.2259	6.1287
LOC100133266	XM_001719543.1	6980598	7	62860662	-0.885	0.541488	-2.68	0.017438	0.252837	3.99	17.77	0.463	97.212	4.3202	4.5409	4.086	3.0058
PRKAG2	NM_001040633.1	3120279	7	151254265	-0.884	0.541863	-3.31	0.004848	0.140681	6.86	83.054	0.277	91.436	7.4647	7.1456	6.408	6.4349
MAFF	NM_012323.2	1430138	22	36941923	-0.883	0.542239	-3.34	0.00459	0.137114	5.32	71.063	0.27	90.993	5.6415	5.873	4.8238	4.9256
FLJ40504	NM_173624.1	4880333	17	23627248	-0.883	0.542239	-3.3	0.004979	0.142345	10.74	98.014	0.279	91.58	11.0456	11.3163	10.4015	10.1942
LOC100133811	XM_001718754.1	4610482			-0.882	0.542615	-3.36	0.004394	0.133993	4.24	40.34	0.265	90.587	4.7663	4.595	3.8305	3.7677
	CX782388	240189	15	92893555	-0.882	0.542615	-3.3	0.004974	0.142303	4.29	44.596	0.278	91.453	4.8162	4.6517	3.9962	3.708
TNFRSF18	NM_148902.1	520066	1	1140793	-0.882	0.542615	-3.3	0.004991	0.14253	5.75	75.156	0.278	91.448	6.3527	6.0362	5.2609	5.3648
LOC642252	XM_930696.1	4070767	3	59714	-0.882	0.542615	-3.26	0.005355	0.147821	4.24	40.548	0.286	91.973	4.6515	4.7164	3.6047	3.9985
ZNF511	NM_145806.2	1260435	10	134976544	-0.882	0.542615	-3.25	0.005556	0.150245	8.06	90.013	0.29	92.24	8.5803	8.415	7.4174	7.813
AHCTF1	NM_015446.3	6040747	1	245079588	-0.882	0.542615	-3.24	0.005591	0.150888	6.89	83.214	0.29	92.217	7.2541	7.4021	6.2448	6.6479
TFIP11	NM_001008697.1	2600600	22	26907104	-0.882	0.542615	-3.17	0.006531	0.163014	6.26	78.916	0.307	93.155	6.7638	6.635	6.0791	5.5566
ACMSD	NM_138326.2	7040450	2	135372392	-0.882	0.542615	-2.81	0.01354	0.227342	3.71	3.178	0.412	96.316	4.0717	4.2305	2.7975	3.7409
RAP1GDS1	NM_021159.3	730035	4	99433638	-0.881	0.542991	-3.39	0.004195	0.129977	5.94	76.606	0.259	90.193	6.3527	6.404	5.4846	5.5103
ARFGAP3	NM_014570.3	3850639	22	41522737	-0.881	0.542991	-3.36	0.004432	0.134144	3.93	13.095	0.264	90.568	4.2752	4.4609	3.4803	3.4943
SLCO4A1	NM_016354.3	4560736	20	60773587	-0.881	0.542991	-3.34	0.004638	0.138117	6.12	77.985	0.269	90.883	6.6718	6.454	5.623	5.7414
PRC1	NM_199413.1	2070494	15	91509500	-0.881	0.542991	-3.3	0.005032	0.143351	9.85	96.458	0.277	91.434	10.177	10.406	9.2886	9.5329
DRP2	NM_001939.2	1010017	X	100402318	-0.881	0.542991	-3.19	0.006233	0.159299	4.17	34.922	0.301	92.892	4.7253	4.5068	3.9625	3.5071
POLR3K	NM_016310.2	7000703	16	97262	-0.881	0.542991	-3	0.009246	0.191709	7.54	87.195	0.351	94.842	8.0289	7.9416	6.7357	7.4736
KIFC1	NM_002263.2	7330674	6	33482588	-0.881	0.542991	-2.64	0.018899	0.261305	7.86	88.942	0.473	97.37	8.094	8.5	6.8861	7.9459
KDELR3	NM_006855.2	3360053	22	37208995	-0.88	0.543367	-3.31	0.004854	0.140681	8.04	89.937	0.272	91.097	8.3367	8.6259	7.5955	7.6081
PJA1	NM_001032396.1	3610274	X	68381308	-0.88	0.543367	-3.31	0.004907	0.141509	6.55	80.943	0.274	91.22	7.1365	6.8411	6.148	6.0693
ROBO1	NM_002941.2	4540113	3	79257309	-0.88	0.543367	-2.99	0.00936	0.192631	3.61	1.334	0.352	94.872	4.0924	4.0074	3.5417	2.7975
PCDHAC2	NM_031883.2	6760156	5	140329013	-0.88	0.543367	-2.65	0.018614	0.25988	4.4	51.517	0.469	97.286	4.837	4.8402	4.5203	3.3967
NDRG2	NM_201539.1	380228	14	21485160	-0.879	0.543744	-3.36	0.004372	0.133472	5.27	70.653	0.26	90.252	5.6551	5.7645	4.8679	4.7943
CPT1A	NM_001031847.1	5290358	11	68283656	-0.879	0.543744	-3.36	0.004391	0.133961	5.88	76.13	0.261	90.284	6.2503	6.3892	5.4472	5.4351
C9orf140	NM_178448.2	1010470	9	139076854	-0.879	0.543744	-3.1	0.007529	0.173963	8.02	89.837	0.321	93.682	8.5607	8.3618	7.2903	7.874
LMCD1	NM_014583.2	3830093	3	8582291	-0.879	0.543744	-3.05	0.008311	0.181727	5.67	74.428	0.333	94.19	6.0775	6.1518	5.5711	4.9006
DACT1	NM_016651.5	5090437	14	58181752	-0.879	0.543744	-2.84	0.012668	0.221736	3.85	7.933	0.396	96.009	3.9007	4.6678	3.1583	3.6514
ZNF365	NM_014951.2	4180301	10	63831873	-0.878	0.544121	-3.33	0.004711	0.139266	5.15	69.368	0.267	90.716	5.5445	5.636	4.8238	4.601
IL12A	NM_000882.2	4120114	3	159713325	-0.878	0.544121	-3.32	0.004752	0.139847	6.27	79.024	0.268	90.841	6.6464	6.7793	5.9438	5.7251
LOC100132051	XM_001724287.1	6900653			-0.878	0.544121	-3.18	0.006319	0.160366	3.54	0.75	0.299	92.759	3.7783	4.1884	2.9632	3.2472
VSTM2A	NM_182546.2	5870091	7	54585277	-0.878	0.544121	-3.1	0.00749	0.173749	3.91	11.569	0.318	93.585	4.6386	4.053	3.3873	3.5489
GAS2L1	NM_006478.3	6280735	22	28038282	-0.878	0.544121	-3.07	0.007905	0.177463	4.77	64.036	0.326	93.904	5.3609	5.0613	4.0488	4.6171
SHISA4	NM_198149.1	5390736	1	200127748	-0.878	0.544121	-2.31	0.035922	0.347102	4.78	64.172	0.632	98.711	5.6867	4.747	4.9241	3.7545
TTTY17A	NR_001526.1	2710092	Y	23408145	-0.878	0.544121	-1.85	0.083921	0.474647	3.42	0.241	1.023	99.674	3.5755	4.1476	1.9499	4.0164
SLCO1B3	NM_019844.2	4850576	12	20960485	-0.877	0.544499	-3.3	0.004937	0.141881	5.17	69.526	0.27	91.008	5.7326	5.4766	4.6604	4.7943
CSNK1A1	NM_001025105.1	7200376	5	148910912	-0.877	0.544499	-2.87	0.011984	0.21686	4.96	67.108	0.383	95.689	5.6867	5.1095	4.8481	4.1949
MTMR6	NM_004685.3	160026	13	25821537	-0.877	0.544499	-2.85	0.012418	0.21966	6.66	81.749	0.39	95.869	6.6689	7.5326	6.1088	6.3381
LOC392264	XR_037854.1	6100039			-0.877	0.544499	-2.75	0.015281	0.239817	4.06	24.387	0.425	96.549	4.7324	4.2714	4.0717	3.1779
POLK	NM_016218.1	2680180	5	74930513	-0.876	0.544876	-3.36	0.004456	0.13447	3.91	11.888	0.259	90.138	4.413	4.2856	3.4803	3.4662
TSPAN7	NM_004615.2	460010	X	38432724	-0.876	0.544876	-3.34	0.004578	0.137016	6.32	79.365	0.261	90.326	6.8058	6.7167	5.8065	5.9638
DLEU2	XR_001514.1	1500661	13	49516020	-0.876	0.544876	-3.02	0.008785	0.18639	6.62	81.43	0.337	94.341	6.7123	7.4021	6.2308	6.131
LOC100133280	XR_037244.1	2630079	5	70109906	-0.876	0.544876	-2.34	0.033924	0.339525	3.87	9.17	0.61	98.592	4.0717	4.5409	4.121	2.7403
MIR149	NR_029702.1	580647			-0.876	0.544876	-2.27	0.038609	0.35755	3.62	1.482	0.651	98.81	3.8208	4.2936	3.9147	2.4481
VEGFB	NM_003377.3	4060333	11	63762769	-0.875	0.545254	-3.27	0.005323	0.147466	9.17	94.614	0.275	91.323	9.6285	9.5791	8.5564	8.9007
ANGPTL4	NM_139314.1	4610433	19	8345182	-0.875	0.545254	-3.22	0.00586	0.154105	7.4	86.384	0.285	91.914	7.9563	7.722	6.7877	7.1414
IL1RAP	NM_002182.2	4880632	3	191851688	-0.875	0.545254	-3.13	0.00707	0.169473	5.11	68.91	0.307	93.134	5.5049	5.5861	4.3954	4.9464
PPAP2B	NM_177414.1	6220097	1	56960987	-0.874	0.545632	-3.31	0.004894	0.14131	6.74	82.27	0.265	90.627	7.2861	7.0683	6.2393	6.3668
CAMK2N2	NM_033259.2	2940142	3	185459954	-0.874	0.545632	-3.25	0.005515	0.149876	4.6	60.069	0.278	91.463	5.2133	4.8632	4.2268	4.1014
NAV2	NM_145117.3	4230195	11	20099593	-0.874	0.545632	-2.99	0.009395	0.192795	4.97	67.2	0.343	94.58	5.0968	5.7142	4.3387	4.7237
TMEM16A	NM_018043.4	6400274	11	69712567	-0.874	0.545632	-2.6	0.020411	0.269586	5.94	76.64	0.477	97.413	5.8086	6.9474	5.4063	5.6011
	AW103831	2970037	16	3187474	-0.873	0.54601	-3.35	0.004466	0.134694	3.8	6.055	0.255	89.867	4.2489	4.2305	3.4016	3.3311
EREG	NM_001432.2	610170	4	75252909	-0.873	0.54601	-3.31	0.004877	0.141016	5.38	71.737	0.263	90.498	5.9339	5.708	4.9125	4.9835
TUBB	NM_178014.2	3610259	6	30691647	-0.873	0.54601	-2.91	0.010884	0.207454	9.23	94.781	0.363	95.173	9.5992	9.7273	8.3917	9.1882
TRAF5	NM_004619.3	3780228	1	209614425	-0.872	0.546389	-3.33	0.004646	0.138284	4.85	65.446	0.257	90.047	5.3517	5.2144	4.3778	4.444
TM4SF19	XM_946172.1	70347			-0.872	0.546389	-2.84	0.012586	0.221206	4.03	20.982	0.383	95.706	4.844	4.0803	3.8112	3.3688
FLJ21511	NM_025087.1	6960086	4	48729467	-0.872	0.546389	-2.81	0.013508	0.227285	3.93	13.464	0.395	95.965	4.121	4.6175	3.1099	3.8849
KRT26	NM_181539.3	6450367	17	36178840	-0.872	0.546389	-2.41	0.029792	0.321769	3.53	0.671	0.564	98.247	3.9211	4.0164	2.416	3.7783
MCM10	NM_018518.3	6580685	10	13252247	-0.872	0.546389	-2.38	0.031197	0.327733	5.75	75.139	0.578	98.359	5.5839	6.7903	4.9653	5.665
ZCCHC12	NM_173798.2	2690279	X	117844643	-0.871	0.546768	-3.29	0.005107	0.144484	7.2	85.097	0.266	90.659	7.586	7.6874	6.6371	6.8938
LOC645118	XM_928149.1	4180546	6	134064685	-0.871	0.546768	-3.27	0.005328	0.147506	4.14	32.142	0.27	90.961	4.6664	4.4951	3.575	3.8443
S100A5	NM_002962.1	7160161	1	153512558	-0.871	0.546768	-2.11	0.052661	0.401331	4.14	31.788	0.758	99.172	4.2138	4.9402	4.4962	2.9152
POLR2L	NM_021128.3	6200017	11	829972	-0.87	0.547147	-3.3	0.004939	0.141881	6.97	83.754	0.26	90.275	7.3103	7.506	6.5907	6.4858
LOC644621	XM_927739.1	4640100	X	134154615	-0.87	0.547147	-3.3	0.005011	0.142909	4.11	29.076	0.262	90.43	4.4652	4.6296	3.7677	3.5866
USP46	NM_022832.2	4230215	4	53156072	-0.87	0.547147	-3.21	0.00593	0.155224	5.63	74.042	0.28	91.626	6.1686	5.9651	5.0193	5.3737
SUNC1	NM_001030019.1	6370731	7	48033983	-0.87	0.547147	-3.2	0.006117	0.157704	4.99	67.458	0.284	91.861	5.6365	5.2084	4.5877	4.5162
FSIP2	NM_173651.1	830706	2	186338273	-0.87	0.547147	-3.17	0.006444	0.162289	4.13	31.232	0.289	92.194	4.4396	4.701	3.5039	3.8963
REEP1	NM_022912.1	1340192	2	86294886	-0.87	0.547147	-2.79	0.014056	0.231478	5.79	75.474	0.399	96.053	5.8314	6.6274	5.1119	5.6061
SNRNP48	NM_152551.3	2350438	6	7556741	-0.869	0.547526	-3.25	0.005546	0.150193	6.58	81.161	0.271	91.033	7.0929	6.9414	6.3006	5.9963
SNORA73B	NR_004406.1	6620039	1	28835165	-0.869	0.547526	-3.07	0.007878	0.177026	5.52	73.033	0.312	93.35	6.1526	5.7553	5.3099	4.8598
UBN2	NM_173569.2	4010494	7	138637565	-0.869	0.547526	-3.04	0.00851	0.183679	4.83	65.154	0.322	93.716	5.572	4.9589	4.2918	4.501
GNPNAT1	NM_198066.2	6330739	14	52311815	-0.868	0.547906	-3.33	0.004656	0.138457	7.31	85.802	0.252	89.606	7.7783	7.7098	6.8944	6.8575
[truncated: 46,119 more rows]

## Sheet: 149 common
149 overlapping genes those showed more than 2 fold reduction in expression between 36 and 72 hrs of KD out of the top 500
[truncated: 149 more rows]
