# Supplementary material for: The S-phase-induced lncRNA SUNO1 promotes cell proliferation by controlling YAP1/Hippo signaling pathway
Source: eLife. 2020 Oct 27;9:e55102. doi: 10.7554/eLife.55102 (PMC7591261; doi:10.7554/eLife.55102)
Supplement: Supplementary file 7. [file elife-55102-supp7.xlsx]

## Sheet: Biotin-SUNO1
Gene Symbol	Protein Description	# Peptides	# PSMs	Area
TUBA1B; TUBA1C	Tubulin alpha-1B chain; Tubulin alpha-1C chain	11	28	5100000
LRRC59	Leucine-rich repeat-containing protein 59	11	25	10000000
NOP58	Nucleolar protein 58	11	25	1300000
RPL23	60S ribosomal protein L23	9	118	80000000
RPL23A	60S ribosomal protein L23a	9	40	990000
RPS4X	40S ribosomal protein S4, X isoform	8	29	2400000
HIST1H4A	Histone H4	8	23	13000000
EEF1A1	Elongation factor 1-alpha 1	8	12	180000
ACACA	Acetyl-CoA carboxylase 1	8	9	180000
ATP5C1	ATP synthase subunit gamma, mitochondrial	7	19	2900000
SRSF1	Serine/arginine-rich splicing factor 1	7	18	2700000
RPS6	40S ribosomal protein S6	7	15	11000000
RPS3A	40S ribosomal protein S3a	7	11	430000
RNH1	Ribonuclease inhibitor	7	10	450000
RPL24	60S ribosomal protein L24	6	21	1000000
PTRF	Polymerase I and transcript release factor	6	21	1200000
YBX1	Nuclease-sensitive element-binding protein 1	6	18	1800000
PUF60	Poly(U)-binding-splicing factor PUF60	6	15	950000
RPL17	60S ribosomal protein L17	6	12	6900000
EIF4A3	Eukaryotic initiation factor 4A-III	6	9	400000
RPLP0	60S acidic ribosomal protein P0	6	8	540000
ACTB; ACTG1	Actin, cytoplasmic 1; Actin, cytoplasmic 2	15	62	5600000
SRSF7	Serine/arginine-rich splicing factor 7	6	13	1900000
H2AFY	Core histone macro-H2A.1	6	6	120000
RPL38	60S ribosomal protein L38	5	14	8700000
SRSF10	Serine/arginine-rich splicing factor 10	5	12	2000000
RPL10	60S ribosomal protein L10	5	10	2400000
RPS8	40S ribosomal protein S8	5	10	420000
U2AF2	Splicing factor U2AF 65 kDa subunit	5	7	530000
PABPC1	Polyadenylate-binding protein 1	5	5	130000
TUBB	Tubulin beta chain	12	24	640000
HNRNPH1	Heterogeneous nuclear ribonucleoprotein H	5	15	790000
SRSF6	Serine/arginine-rich splicing factor 6	5	10	450000
HNRNPC	Heterogeneous nuclear ribonucleoproteins C1/C2	4	14	310000
LYAR	Cell growth-regulating nucleolar protein	4	11	880000
RPS13	40S ribosomal protein S13	4	6	1100000
RPL26	60S ribosomal protein L26	4	6	1300000
RPS7	40S ribosomal protein S7	4	6	1900000
CHERP	Calcium homeostasis endoplasmic reticulum protein	4	6	1300000
ILF2	Interleukin enhancer-binding factor 2	4	6	110000
RBM39	RNA-binding protein 39	4	5	94000
SNRPA1	U2 small nuclear ribonucleoprotein A'	4	5	150000
PGAM5	Serine/threonine-protein phosphatase PGAM5, mitochondrial	4	5	410000
PRPF19	Pre-mRNA-processing factor 19	4	5	220000
PCCB	Propionyl-CoA carboxylase beta chain, mitochondrial	4	5	470000
RPL8	60S ribosomal protein L8	4	4	370000
HSD17B12	Very-long-chain 3-oxoacyl-CoA reductase	4	4	340000
GULP1	PTB domain-containing engulfment adapter protein 1	4	4	180000
TUBB4B	Tubulin beta-4B chain	11	21	220000
HNRNPF	Heterogeneous nuclear ribonucleoprotein F	4	13	510000
SRSF5	Serine/arginine-rich splicing factor 5	4	7	300000
TRA2A	Transformer-2 protein homolog alpha	3	16	320000
RPS23	40S ribosomal protein S23	3	12	13000000
RPL22L1	60S ribosomal protein L22-like 1	3	9	1700000
RPS11	40S ribosomal protein S11	3	7	120000
RPS26	40S ribosomal protein S26	3	7	10000000
TMA16	Translation machinery-associated protein 16	3	6	360000
SRSF9	Serine/arginine-rich splicing factor 9	3	5	49000
RBFA	Putative ribosome-binding factor A, mitochondrial	3	5	210000
FRG1	Protein FRG1	3	5	1600000
GAPDH	Glyceraldehyde-3-phosphate dehydrogenase	3	4	330000
DIMT1	Probable dimethyladenosine transferase	3	4	330000
HNRNPK	Heterogeneous nuclear ribonucleoprotein K	3	4	280000
GLTSCR2	Glioma tumor suppressor candidate region gene 2 protein	3	4	130000
NIFK	MKI67 FHA domain-interacting nucleolar phosphoprotein	3	4	420000
HNRNPU	Heterogeneous nuclear ribonucleoprotein U	3	4	160000
U2SURP	U2 snRNP-associated SURP motif-containing protein	3	4	230000
RPL37A	60S ribosomal protein L37a	3	4	2700000
RPL35	60S ribosomal protein L35	3	4	3700000
SGPL1	Sphingosine-1-phosphate lyase 1	3	4	310000
AP2M1	AP-2 complex subunit mu	3	3	160000
HNRNPA1	Heterogeneous nuclear ribonucleoprotein A1	3	3	320000
RPL7A	60S ribosomal protein L7a	3	3	280000
RPS14	40S ribosomal protein S14	3	3	1400000
VANGL1	Vang-like protein 1	3	3	79000
RPS18	40S ribosomal protein S18	3	3	540000
FBL	rRNA 2'-O-methyltransferase fibrillarin	3	3	260000
GNL3	Guanine nucleotide-binding protein-like 3	3	3	94000
RPL13	60S ribosomal protein L13	3	3	63000
TJP1	Tight junction protein ZO-1	3	3	200000
MCCC2	Methylcrotonoyl-CoA carboxylase beta chain, mitochondrial	3	3	150000
MMTAG2	Multiple myeloma tumor-associated protein 2	3	3	220000
ATP5A1	ATP synthase subunit alpha, mitochondrial	3	3	440000
DDX56	Probable ATP-dependent RNA helicase DDX56	3	3	50000
DDX5	Probable ATP-dependent RNA helicase DDX5	6	15	97000
SLC25A6	ADP/ATP translocase 3	6	13	670000
SLC25A5	ADP/ATP translocase 2	6	9	200000
HIST1H2AB/C/D/E/G/H/J; HIST3H2A; H2AFJ	Histone H2A type 1-B/C/D/E/G/H/J; Histone H2A type 3; Histone H2A.J	3	12	11000000
H2AFY2	Core histone macro-H2A.2	3	3	71000
DDX3X	ATP-dependent RNA helicase DDX3X	3	3	73000
TRA2B	Transformer-2 protein homolog beta	2	16	1400000
RPS24	40S ribosomal protein S24	2	7	11000000
RPL27A	60S ribosomal protein L27a	2	6	220000
RPL36A	60S ribosomal protein L36a	2	4	6700000
DHX15	Putative pre-mRNA-splicing factor ATP-dependent RNA helicase DHX15	2	4	210000
ATP5B	ATP synthase subunit beta, mitochondrial	2	3	76000
SRSF2	Serine/arginine-rich splicing factor 2	2	3	890000
RPL18	60S ribosomal protein L18	2	3	240000
NGDN	Neuroguidin	2	3	490000
RPS25	40S ribosomal protein S25	2	3	360000
MED19	Mediator of RNA polymerase II transcription subunit 19	2	3	110000
SRRM2	Serine/arginine repetitive matrix protein 2	2	3	120000
RRP1	Ribosomal RNA processing protein 1 homolog A	2	3	130000
RPLP2	60S acidic ribosomal protein P2	2	3	480000
PPP1CA/B/C	Serine/threonine-protein phosphatase PP1-alpha/beta/gamma catalytic subunit	2	3	360000
EFTUD2	116 kDa U5 small nuclear ribonucleoprotein component	2	2	84000
EIF2S2	Eukaryotic translation initiation factor 2 subunit 2	2	2	24000
RPL22	60S ribosomal protein L22	2	2	240000
NONO	Non-POU domain-containing octamer-binding protein	2	2	28000
MRPS12	28S ribosomal protein S12, mitochondrial	2	2	1200000
SLC25A1	Tricarboxylate transport protein, mitochondrial	2	2	200000
RPS3	40S ribosomal protein S3	2	2	130000
SLC25A3	Phosphate carrier protein, mitochondrial	2	2	490000
RPS16	40S ribosomal protein S16	2	2	2600000
MRPL14	39S ribosomal protein L14, mitochondrial	2	2	280000
LUC7L3	Luc7-like protein 3	2	2	440000
NUDT21	Cleavage and polyadenylation specificity factor subunit 5	2	2	56000
CKAP4	Cytoskeleton-associated protein 4	2	2	160000
CSNK2A1; CSNK2A3	Casein kinase II subunit alpha; Casein kinase II subunit alpha 3	2	2	120000
C9orf114	Putative methyltransferase C9orf114	2	2	110000
DDX24	ATP-dependent RNA helicase DDX24	2	2	230000
RCN2	Reticulocalbin-2	2	2	380000
SNRNP40	U5 small nuclear ribonucleoprotein 40 kDa protein	2	2	15000
RPL31	60S ribosomal protein L31	2	2	520000
HSPB1	Heat shock protein beta-1	2	2	48000
CCDC59	Thyroid transcription factor 1-associated protein 26	2	2	250000
RPS27	40S ribosomal protein S27	2	2	410000
RPS10	40S ribosomal protein S10	2	2	61000
SNRPD2	Small nuclear ribonucleoprotein Sm D2	2	2	120000
RPL18A	60S ribosomal protein L18a	2	2	31000
DDX47	Probable ATP-dependent RNA helicase DDX47	2	2
RPL28	60S ribosomal protein L28	2	2	1500000
ACTA1/2; ACTC1; ACTG2	Actin, alpha smooth muscle; Actin, aortic smooth muscle; Actin, alpha cardiac muscle 1; Actin, gamma-enteric smooth muscle	9	26	58000
POTEE	POTE ankyrin domain family member E	6	29
DDX17	Probable ATP-dependent RNA helicase DDX17	5	15	120000
HIST1H2BB/J/O; HIST2H2BE; HIST3H2BB	Histone H2B type 1-B/J/O; Histone H2B type 2-E; Histone H2B type 3-B	4	17	240000
HIST1H2BC/D/E/F/G/H/I/K/L/M/N; HIST2H2BF; H2BFS	Histone H2B type 1-C/D/E/F/G/H/I/K/L/M/N; Histone H2B type 2-F; Histone H2B type F-S	4	17	61000
SRSF3	Serine/arginine-rich splicing factor 3	2	6	170000
H2AFZ; H2AFV	Histone H2A.Z; Histone H2A.V	2	5	9700000
FAM207A	Protein FAM207A	1	3	240000
SNRPD1	Small nuclear ribonucleoprotein Sm D1	1	2	4000000
RPL6	60S ribosomal protein L6	1	2	310000
LUC7L2	Putative RNA-binding protein Luc7-like 2	1	2	150000
RALY; RALYL	RNA-binding protein Raly; RNA-binding Raly-like protein	1	2	42000
KPNA2	Importin subunit alpha-1	1	2	430000
SNRPD3	Small nuclear ribonucleoprotein Sm D3	1	2	270000
RBMX; RBMXL1	RNA-binding motif protein, X chromosome; RNA-binding motif protein, X-linked-like-1	1	2	81000
DHX9	ATP-dependent RNA helicase A	1	2
HSP90AA1; HSP90AB1l TRAP1	Heat shock protein HSP 90-alpha; Heat shock protein HSP 90-beta; Heat shock protein 75 kDa, mitochondrial	1	2	220000
DPM1	Dolichol-phosphate mannosyltransferase subunit 1	1	2	220000
FAU	40S ribosomal protein S30	1	2	3400000
RPS5	40S ribosomal protein S5	1	2	510000
TMCO1	Transmembrane and coiled-coil domain-containing protein 1	1	2	130000
DDX21	Nucleolar RNA helicase 2	1	2	310000
ATAD3A	ATPase family AAA domain-containing protein 3A	1	2	46000
RPL12	60S ribosomal protein L12	1	1	22000
MYO1C	Unconventional myosin-Ic	1	1	21000
PTPMT1	Phosphatidylglycerophosphatase and protein-tyrosine phosphatase 1	1	1	74000
SNRNP70	U1 small nuclear ribonucleoprotein 70 kDa	1	1	21000
RPL7	60S ribosomal protein L7	1	1	420000
SNRPB2	U2 small nuclear ribonucleoprotein B''	1	1	140000
KTN1	Kinectin	1	1	110000
PRPF40A	Pre-mRNA-processing factor 40 homolog A	1	1	180000
H1F0	Histone H1.0	1	1	500000
NCOA5	Nuclear receptor coactivator 5	1	1	180000
ILF3	Interleukin enhancer-binding factor 3	1	1	79000
SRRM1	Serine/arginine repetitive matrix protein 1	1	1	180000
MYO1A; MYO1B	Unconventional myosin-Ia; Unconventional myosin-Ib	1	1	57000
RPL3	60S ribosomal protein L3	1	1	68000
RPL34	60S ribosomal protein L34	1	1	170000
TEX10	Testis-expressed sequence 10 protein	1	1	32000
UTP15	U3 small nucleolar RNA-associated protein 15 homolog	1	1	16000
DDX52	Probable ATP-dependent RNA helicase DDX52	1	1	93000
HNRNPM	Heterogeneous nuclear ribonucleoprotein M	1	1	390000
RAB11FIP1; RAB11FIP2	Rab11 family-interacting protein 1; Rab11 family-interacting protein 2	1	1	31000
MUC16	Mucin-16	1	1
KRR1	KRR1 small subunit processome component homolog	1	1	61000
RPL14	60S ribosomal protein L14	1	1	67000
GNB2L1	Guanine nucleotide-binding protein subunit beta-2-like 1	1	1
STAU1	Double-stranded RNA-binding protein Staufen homolog 1	1	1	39000
NOP56	Nucleolar protein 56	1	1	61000
DNAJA3	DnaJ homolog subfamily A member 3, mitochondrial	1	1
RBM17	Splicing factor 45	1	1	44000
DDX39A; DDX39B	ATP-dependent RNA helicase DDX39A; Spliceosome RNA helicase DDX39B	1	1	32000
SNRPA	U1 small nuclear ribonucleoprotein A	1	1	90000
RNPS1	RNA-binding protein with serine-rich domain 1	1	1
SF3B3	Splicing factor 3B subunit 3	1	1
SAP30BP	SAP30-binding protein	1	1
GTPBP4	Nucleolar GTP-binding protein 1	1	1	90000
RPL10A	60S ribosomal protein L10a	1	1	91000
AGK	Acylglycerol kinase, mitochondrial	1	1	180000
HNRNPA0	Heterogeneous nuclear ribonucleoprotein A0	1	1
RPS15A	40S ribosomal protein S15a	1	1	110000
RNF2	E3 ubiquitin-protein ligase RING2	1	1	81000
ARGLU1	Arginine and glutamate-rich protein 1	1	1	160000
NPM1	Nucleophosmin	1	1	130000
C1QBP	Complement component 1 Q subcomponent-binding protein, mitochondrial	1	1
RPL30	60S ribosomal protein L30	1	1	440000
HNRNPH3	Heterogeneous nuclear ribonucleoprotein H3	1	1	59000
APOBEC3B; APOBEC3D	DNA dC->dU-editing enzyme APOBEC-3B; DNA dC->dU-editing enzyme APOBEC-3D	1	1
EIF2S1	Eukaryotic translation initiation factor 2 subunit 1	1	1	26000
HNRNPA2B1	Heterogeneous nuclear ribonucleoproteins A2/B1	1	1	190000
EIF2S3	Eukaryotic translation initiation factor 2 subunit 3	1	1
DMD	Dystrophin	1	1	57000
MATR3	Matrin-3	1	1	350000
TMOD3	Tropomodulin-3	1	1	21000
FTSJ3	pre-rRNA processing protein FTSJ3	1	1	98000
EIF5B	Eukaryotic translation initiation factor 5B	1	1	89000
AHNAK	Neuroblast differentiation-associated protein AHNAK	1	1	800000
ISY1	Pre-mRNA-splicing factor ISY1 homolog	1	1	97000
LMNA	Prelamin-A/C	1	1	120000
PCBP1	Poly(rC)-binding protein 1	1	1	310000
HSPA8	Heat shock cognate 71 kDa protein	1	1	17000
RBM25	RNA-binding protein 25	1	1	260000
ANXA2	Annexin A2	1	1	24000
ERAL1	GTPase Era, mitochondrial	1	1	19000
SSR1	Translocon-associated protein subunit alpha	1	1	390000
SSRP1	FACT complex subunit SSRP1	1	1	23000
NUSAP1	Nucleolar and spindle-associated protein 1	1	1
RPL29	60S ribosomal protein L29	1	1	120000
PRPF38A	Pre-mRNA-splicing factor 38A	1	1
DKC1	H/ACA ribonucleoprotein complex subunit 4	1	1	300000
SFPQ	Splicing factor, proline- and glutamine-rich	1	1	250000
CCDC47	Coiled-coil domain-containing protein 47	1	1	200000
CDK11A; CDK11B	Cyclin-dependent kinase 11A; Cyclin-dependent kinase 11B	1	1	57000
MRPL10	39S ribosomal protein L10, mitochondrial	1	1	210000
ENY2	Transcription and mRNA export factor ENY2	1	1	560000
TBL2	Transducin beta-like protein 2	1	1	160000
TRMT10C	Mitochondrial ribonuclease P protein 1	1	1	40000
TMEM33	Transmembrane protein 33	1	1
RPS9	40S ribosomal protein S9	1	1	230000
WNT16	Protein Wnt-16	1	1	230000
TAF15; FUS	TATA-binding protein-associated factor 2N; RNA-binding protein FUS	1	1	120000
EMD	Emerin	1	1	84000
LRAT	Lecithin retinol acyltransferase	1	1	83000
HSPA6; HSPA1A	Heat shock 70 kDa protein 6; Heat shock 70 kDa 1A/1B	1	1	28000
RPL4	60S ribosomal protein L4	1	1	58000
FAM60A	Protein FAM60A	1	1	120000
NOC4L	Nucleolar complex protein 4 homolog	1	1	190000
TMEM183A; TMEM183B	Transmembrane protein 183A; Transmembrane protein 183B	1	1
NHP2	H/ACA ribonucleoprotein complex subunit 2	1	1	37000
SRP9	Signal recognition particle 9 kDa protein	1	1	1200000
RRP12	RRP12-like protein	1	1	51000
PRKRA	Interferon-inducible double-stranded RNA-dependent protein kinase activator A	1	1	67000
ALYREF	THO complex subunit 4	1	1	110000
CAAP1	Caspase activity and apoptosis inhibitor 1	1	1	120000
SMN1	Survival motor neuron protein	1	1	120000
HIST1H1A/C/D/E; HIST1H1T	Histone H1.1/2/3/4; Histone H1t	1	1	1100000
AGAP3	Arf-GAP with GTPase, ANK repeat and PH domain-containing protein 3	1	1	94000
DNAJB3; DNAJB6	DnaJ homolog subfamily B member 3; DnaJ homolog subfamily B member 6	1	1	38000
IMP4	U3 small nucleolar ribonucleoprotein protein IMP4	1	1	40000
FIBP	Acidic fibroblast growth factor intracellular-binding protein	1	1	62000
OSBPL8	Oxysterol-binding protein-related protein 8	1	1	310000

## Sheet: Biotin-YFP
Gene Symbol	Protein Description	# Peptides	# PSMs	Area
ACTB: ACTG1	Actin, cytoplasmic 1; Actin, cytoplasmic 2	12	33	11000000
TUBA1B	Tubulin alpha-1B chain	9	20	5400000
RPL23	60S ribosomal protein L23	7	60	45000000
RPL23A	60S ribosomal protein L23a	6	21	13000000
SRSF1	Serine/arginine-rich splicing factor 1	6	10	780000
LRRC59	Leucine-rich repeat-containing protein 59	6	8	2300000
CHERP	Calcium homeostasis endoplasmic reticulum protein	6	7	650000
ATP5C1	ATP synthase subunit gamma, mitochondrial	6	7	830000
ACACA	Acetyl-CoA carboxylase 1	6	6	220000
RPL24	60S ribosomal protein L24	5	15	6200000
RPL38	60S ribosomal protein L38	5	9	5100000
HIST1H4A	Histone H4	5	9	3500000
TUBB	Tubulin beta chain	9	16	4100000
YBX1	Nuclease-sensitive element-binding protein 1	4	16	4200000
HIST1H2BC/D/E/F/G/H/I/K/L/M/N; HIST2H2BF; H2BFS	Histone H2B type 1-C/D/E/F/G/H/I/K/L/M/N; Histone H2B type 2-F; Histone H2B type F-S	4	9	4400000
PTRF	Polymerase I and transcript release factor	4	8	5400000
RPS4X	40S ribosomal protein S4, X isoform	4	7	1700000
RPL17	60S ribosomal protein L17	4	6	3600000
NOP58	Nucleolar protein 58	4	6	2100000
SGPL1	Sphingosine-1-phosphate lyase 1	4	6	730000
CKAP4	Cytoskeleton-associated protein 4	4	5	240000
EEF1A1	Elongation factor 1-alpha 1	4	5	140000
RRP1	Ribosomal RNA processing protein 1 homolog A	4	4	320000
SNRNP200	U5 small nuclear ribonucleoprotein 200 kDa helicase	4	4	100000
PRPF19	Pre-mRNA-processing factor 19	4	4	860000
DDX47	Probable ATP-dependent RNA helicase DDX47	4	4	430000
RBM25	RNA-binding protein 25	4	4	200000
SRSF7	Serine/arginine-rich splicing factor 7	4	8	430000
SRSF10	Serine/arginine-rich splicing factor 10	3	6	1100000
RPS6	40S ribosomal protein S6	3	6	1600000
HNRNPH1	Heterogeneous nuclear ribonucleoprotein H	3	5	1700000
NOP56	Nucleolar protein 56	3	5	240000
LYAR	Cell growth-regulating nucleolar protein	3	5	1200000
HNRNPU	Heterogeneous nuclear ribonucleoprotein U	3	4	440000
SLC25A6	ADP/ATP translocase 3	3	4	800000
GLTSCR2	Glioma tumor suppressor candidate region gene 2 protein	3	4	610000
U2AF2	Splicing factor U2AF 65 kDa subunit	3	4	460000
H2AFY	Core histone macro-H2A.1	3	4	240000
PRPF40A	Pre-mRNA-processing factor 40 homolog A	3	3	140000
U2SURP	U2 snRNP-associated SURP motif-containing protein	3	3	140000
GNL3	Guanine nucleotide-binding protein-like 3	3	3	150000
RPS7	40S ribosomal protein S7	3	3	3700000
RBM39	RNA-binding protein 39	3	3	300000
RPS3A	40S ribosomal protein S3a	3	3	140000
RPS8	40S ribosomal protein S8	3	3	170000
ATP5A1	ATP synthase subunit alpha, mitochondrial	3	3	660000
TUBB4B	Tubulin beta-4B chain	7	11	1100000
HIST1H2AB/C/D/E/G/H/J; HIST3H2A; H2AFJ	Histone H2A type 1-B/C/D/E/G/H/J; Histone H2A type 3; Histone H2A.J	3	11	8100000
H2AFZ; H2AFV	Histone H2A.Z; Histone H2A.V	3	4	1000000
RPS23	40S ribosomal protein S23	2	9	2300000
TRA2B	Transformer-2 protein homolog beta	2	5	370000
TRA2A	Transformer-2 protein homolog alpha	2	5	260000
RPL22L1	60S ribosomal protein L22-like 1	2	5	2600000
PUF60	Poly(U)-binding-splicing factor PUF60	2	4	950000
DDX17; DDX5	Probable ATP-dependent RNA helicase DDX17; Probable ATP-dependent RNA helicase DDX5	2	4	110000
RPS24	40S ribosomal protein S24	2	3	1600000
RPL8	60S ribosomal protein L8	2	3	130000
RPL10	60S ribosomal protein L10	2	3	160000
SRSF6	Serine/arginine-rich splicing factor 6	2	2	130000
SSRP1	FACT complex subunit SSRP1	2	2	81000
FRG1	Protein FRG1	2	2	490000
PRKRA	Interferon-inducible double-stranded RNA-dependent protein kinase activator A	2	2	57000
ILF2	Interleukin enhancer-binding factor 2	2	2	93000
SRRM2	Serine/arginine repetitive matrix protein 2	2	2	35000
CCDC59	Thyroid transcription factor 1-associated protein 26	2	2	77000
DDX24	ATP-dependent RNA helicase DDX24	2	2	100000
RPS11	40S ribosomal protein S11	2	2	450000
EIF4A3	Eukaryotic initiation factor 4A-III	2	2	140000
RNH1	Ribonuclease inhibitor	2	2	100000
DDX52	Probable ATP-dependent RNA helicase DDX52	2	2	170000
DDX56	Probable ATP-dependent RNA helicase DDX56	2	2	160000
TUBB4A	Tubulin beta-4A chain	5	9
SRSF3	Serine/arginine-rich splicing factor 3	2	6	2100000
RPL36A	60S ribosomal protein L36a	2	5	2500000
RPL36AL	60S ribosomal protein L36a-like	2	4	1300000
RPL37A	60S ribosomal protein L37a	1	4
HSP90AA1; HSP90AB1; TRAP1	Heat shock protein HSP 90-alpha	1	4	170000
DHX15	Putative pre-mRNA-splicing factor ATP-dependent RNA helicase DHX15	1	3	1200000
	Ig kappa chain V-II region RPMI 6410/Cum/TEW/GM607	1	3	4900000
RPL27A	60S ribosomal protein L27a	1	3	410000
RPS26	40S ribosomal protein S26	1	3	7000000
HIST1H1A/C/D/E; HIST1H1T	Histone H1.1/2/3/4; Histone H1t	1	2	400000
EFTUD2	116 kDa U5 small nuclear ribonucleoprotein component	1	2	70000
COIL	Coilin	1	2	180000
RPS5	40S ribosomal protein S5	1	2	1700000
OSBPL8	Oxysterol-binding protein-related protein 8	1	2	250000
FAU	40S ribosomal protein S30	1	2	2700000
TMA16	Translation machinery-associated protein 16	1	2
DDX21	Nucleolar RNA helicase 2	1	2	140000
SNRPD1	Small nuclear ribonucleoprotein Sm D1	1	2	6000000
NGDN	Neuroguidin	1	2	96000
DHX9	ATP-dependent RNA helicase A	1	1	70000
EIF2S2	Eukaryotic translation initiation factor 2 subunit 2	1	1	85000
RPL35	60S ribosomal protein L35	1	1	1400000
KPNA2	Importin subunit alpha-1	1	1	260000
RPS27A; UBA52; UBB; UBC	Ubiquitin-40S ribosomal protein S27a; Ubiquitin-60S ribosomal protein L40; Polyubiquitin-B; Polyubiquitin-C	1	1	360000
RPL4	60S ribosomal protein L4	1	1
AP4E1	AP-4 complex subunit epsilon-1	1	1
NOC4L	Nucleolar complex protein 4 homolog	1	1
SF3B1	Splicing factor 3B subunit 1	1	1
PHB2	Prohibitin-2	1	1	68000
DDX54	ATP-dependent RNA helicase DDX54	1	1	120000
DBT	Lipoamide acyltransferase component of branched-chain alpha-keto acid dehydrogenase complex, mitochondrial	1	1	260000
JAZF1	Juxtaposed with another zinc finger protein 1	1	1	49000
DDX18	ATP-dependent RNA helicase DDX18	1	1	58000
MYO1B	Unconventional myosin-Ib	1	1	38000
DDX41	Probable ATP-dependent RNA helicase DDX41	1	1	170000
ALB	Serum albumin	1	1	110000
NAT10	N-acetyltransferase 10	1	1	31000
GTPBP4	Nucleolar GTP-binding protein 1	1	1	420000
VANGL1	Vang-like protein 1	1	1	240000
RPS16	40S ribosomal protein S16	1	1	1200000
FAM207A	Protein FAM207A	1	1	150000
RPLP0	60S acidic ribosomal protein P0	1	1	250000
MYO1C	Unconventional myosin-Ic	1	1	37000
RPL13	60S ribosomal protein L13	1	1	300000
SRSF2	Serine/arginine-rich splicing factor 2	1	1	300000
TEX10	Testis-expressed sequence 10 protein	1	1
SRSF5	Serine/arginine-rich splicing factor 5	1	1	44000
TJP1	Tight junction protein ZO-1	1	1	77000
RPL19	60S ribosomal protein L19	1	1	720000
HNRNPK	Heterogeneous nuclear ribonucleoprotein K	1	1	660000
DPM1	Dolichol-phosphate mannosyltransferase subunit 1	1	1	140000
RPL7A	60S ribosomal protein L7a	1	1	140000
EIF2S3	Eukaryotic translation initiation factor 2 subunit 3	1	1	110000
DIMT1	Probable dimethyladenosine transferase	1	1	43000
RPL22	60S ribosomal protein L22	1	1	230000
HNRNPC	Heterogeneous nuclear ribonucleoproteins C1/C2	1	1
SF3A3	Splicing factor 3A subunit 3	1	1
RPL29	60S ribosomal protein L29	1	1	560000
DCAF13	DDB1- and CUL4-associated factor 13	1	1	150000
SRSF9	Serine/arginine-rich splicing factor 9	1	1	260000
LUC7L3	Luc7-like protein 3	1	1	430000
RPS14	40S ribosomal protein S14	1	1	1100000
PPIG	Peptidyl-prolyl cis-trans isomerase G	1	1	160000
SLC25A1	Tricarboxylate transport protein, mitochondrial	1	1	150000
TSKS	Testis-specific serine kinase substrate	1	1
MCCC2	Methylcrotonoyl-CoA carboxylase beta chain, mitochondrial	1	1	240000
ARGLU1	Arginine and glutamate-rich protein 1	1	1	280000
DKC1	H/ACA ribonucleoprotein complex subunit 4	1	1	1400000
RPS27; RPS27L	40S ribosomal protein S27; 40S ribosomal protein S27-like	1	1	3500000
MMTAG2	Multiple myeloma tumor-associated protein 2	1	1	69000
RCN2	Reticulocalbin-2	1	1	110000
RPL31	60S ribosomal protein L31	1	1	1300000
HSPA8	Heat shock cognate 71 kDa protein	1	1	95000
PFKP	ATP-dependent 6-phosphofructokinase, platelet type	1	1	120000
RPS9	40S ribosomal protein S9	1	1	210000
CSNK2A1; CSNK2A3	Casein kinase II subunit alpha; Casein kinase II subunit alpha 3	1	1	37000
SF3B4	Splicing factor 3B subunit 4	1	1	82000
WNT16	Protein Wnt-16	1	1	66000
RPL26	60S ribosomal protein L26	1	1	500000
CHD3/4/5	Chromodomain-helicase-DNA-binding protein 3/4/5	1	1	110000
RPS2	40S ribosomal protein S2	1	1	110000
PRPF4	U4/U6 small nuclear ribonucleoprotein Prp4	1	1	140000
C9orf114	Putative methyltransferase C9orf114	1	1	75000

## Sheet: Combined
Gene Symbol	Protein Description	Biotin-YFP Pep	Biotin-YFP PSMs	Biotin-YFP Area	Biotin-SUNO1 Pep	Biotin-SUNO1 PSMs	Biotin-SUNO1 Area
ABCF1	ATP-binding cassette sub-family F member 1
ACACA	Acetyl-CoA carboxylase 1	6	6	220000	8	9	180000
ACTA1/2; ACTC1; ACTG2	Actin, alpha smooth muscle; Actin, aortic smooth muscle; Actin, alpha cardiac muscle 1; Actin, gamma-enteric smooth muscle				9	26	58000
ACTB: ACTG1	Actin, cytoplasmic 1; Actin, cytoplasmic 2	12	33	11000000	15	62	5600000
ACTN1; ACTN4	Alpha-actinin-1; Alpha-actinin-4
AGAP3	Arf-GAP with GTPase, ANK repeat and PH domain-containing protein 3				1	1	94000
AGK	Acylglycerol kinase, mitochondrial				1	1	180000
AHNAK	Neuroblast differentiation-associated protein AHNAK				1	1	800000
ALYREF	THO complex subunit 4				1	1	110000
ANXA2	Annexin A2				1	1	24000
AP2M1	AP-2 complex subunit mu				3	3	160000
APOBEC3B; APOBEC3D	DNA dC->dU-editing enzyme APOBEC-3B; DNA dC->dU-editing enzyme APOBEC-3D				1	1
ARGLU1	Arginine and glutamate-rich protein 1	1	1	280000	1	1	160000
ASAP2	Arf-GAP with SH3 domain, ANK repeat and PH domain-containing protein 2
ATAD3A	ATPase family AAA domain-containing protein 3A				1	2	46000
ATP5A1	ATP synthase subunit alpha, mitochondrial	3	3	660000	3	3	440000
ATP5B	ATP synthase subunit beta, mitochondrial				2	3	76000
ATP5C1	ATP synthase subunit gamma, mitochondrial	6	7	830000	7	19	2900000
BCLAF1	Bcl-2-associated transcription factor 1
C1QBP	Complement component 1 Q subcomponent-binding protein, mitochondrial				1	1
C9orf114	Putative methyltransferase C9orf114	1	1	75000	2	2	110000
CAAP1	Caspase activity and apoptosis inhibitor 1				1	1	120000
CCDC47	Coiled-coil domain-containing protein 47				1	1	200000
CCDC59	Thyroid transcription factor 1-associated protein 26	2	2	77000	2	2	250000
CDC5L	Cell division cycle 5-like protein
CDK11A; CDK11B	Cyclin-dependent kinase 11A; Cyclin-dependent kinase 11B				1	1	57000
CDK12	Cyclin-dependent kinase 12
CGN	Cingulin
CHD4	Chromodomain-helicase-DNA-binding protein 4	1	1	110000
CHERP	Calcium homeostasis endoplasmic reticulum protein	6	7	650000	4	6	1300000
CKAP4	Cytoskeleton-associated protein 4	4	5	240000	2	2	160000
COIL	Coilin	1	2	180000
CSNK2A1; CSNK2A3	Casein kinase II subunit alpha; Casein kinase II subunit alpha 3	1	1	37000	2	2	120000
DAXX	Death domain-associated protein 6
DDX17	Probable ATP-dependent RNA helicase DDX17	2	4	110000	5	15	120000
DDX18	ATP-dependent RNA helicase DDX18	1	1	58000
DDX21	Nucleolar RNA helicase 2	1	2	140000	1	2	310000
DDX24	ATP-dependent RNA helicase DDX24	2	2	100000	2	2	230000
DDX39A; DDX39B	ATP-dependent RNA helicase DDX39A; Spliceosome RNA helicase DDX39B				1	1	32000
DDX3X	ATP-dependent RNA helicase DDX3X				3	3	73000
DDX41	Probable ATP-dependent RNA helicase DDX41	1	1	170000
DDX46	Probable ATP-dependent RNA helicase DDX46
DDX47	Probable ATP-dependent RNA helicase DDX47	4	4	430000	2	2
DDX5	Probable ATP-dependent RNA helicase DDX5	2	4	110000	6	15	97000
DDX52	Probable ATP-dependent RNA helicase DDX52	2	2	170000	1	1	93000
DDX54	ATP-dependent RNA helicase DDX54	1	1	120000
DDX56	Probable ATP-dependent RNA helicase DDX56	2	2	160000	3	3	50000
DHX15	Putative pre-mRNA-splicing factor ATP-dependent RNA helicase DHX15	1	3	1200000	2	4	210000
DHX30	Putative ATP-dependent RNA helicase DHX30
DHX37	Probable ATP-dependent RNA helicase DHX37
DHX9	ATP-dependent RNA helicase A	1	1	70000	1	2
DIMT1	Probable dimethyladenosine transferase	1	1	43000	3	4	330000
DKC1	H/ACA ribonucleoprotein complex subunit 4	1	1	1400000	1	1	300000
DMD	Dystrophin				1	1	57000
DNAJA3	DnaJ homolog subfamily A member 3, mitochondrial				1	1
DNAJB3; DNAJB6	DnaJ homolog subfamily B member 3; DnaJ homolog subfamily B member 6				1	1	38000
DPM1	Dolichol-phosphate mannosyltransferase subunit 1	1	1	140000	1	2	220000
EEF1A1	Elongation factor 1-alpha 1	4	5	140000	8	12	180000
EFTUD2	116 kDa U5 small nuclear ribonucleoprotein component	1	2	70000	2	2	84000
EIF2S1	Eukaryotic translation initiation factor 2 subunit 1				1	1	26000
EIF2S2	Eukaryotic translation initiation factor 2 subunit 2	1	1	85000	2	2	24000
EIF2S3	Eukaryotic translation initiation factor 2 subunit 3	1	1	110000	1	1
EIF3A	Eukaryotic translation initiation factor 3 subunit A
EIF3B	Eukaryotic translation initiation factor 3 subunit B
EIF3D	Eukaryotic translation initiation factor 3 subunit D
EIF4A3	Eukaryotic initiation factor 4A-III	2	2	140000	6	9	400000
EIF5B	Eukaryotic translation initiation factor 5B				1	1	89000
EMD	Emerin				1	1	84000
ENY2	Transcription and mRNA export factor ENY2				1	1	560000
ERAL1	GTPase Era, mitochondrial				1	1	19000
ESF1	ESF1 homolog
ESYT2	Extended synaptotagmin-2
FAM207A	Protein FAM207A	1	1	150000	1	3	240000
FAM60A	Protein FAM60A				1	1	120000
FAU	40S ribosomal protein S30	1	2	2700000	1	2	3400000
FBL	rRNA 2'-O-methyltransferase fibrillarin				3	3	260000
FIBP	Acidic fibroblast growth factor intracellular-binding protein				1	1	62000
FIP1L1	Pre-mRNA 3'-end-processing factor FIP1
FRG1	Protein FRG1	2	2	490000	3	5	1600000
FRMPD2	FERM and PDZ domain-containing protein 2
FSIP2	Fibrous sheath-interacting protein 2
FTSJ3	pre-rRNA processing protein FTSJ3				1	1	98000
G3BP1	Ras GTPase-activating protein-binding protein 1
G3BP2	Ras GTPase-activating protein-binding protein 2
GAPDH	Glyceraldehyde-3-phosphate dehydrogenase				3	4	330000
GLTSCR2	Glioma tumor suppressor candidate region gene 2 protein	3	4	610000	3	4	130000
GNB2L1	Guanine nucleotide-binding protein subunit beta-2-like 1				1	1
GNL3	Guanine nucleotide-binding protein-like 3	3	3	150000	3	3	94000
GNL3L	Guanine nucleotide-binding protein-like 3-like protein
GTF2F1	General transcription factor IIF subunit 1
GTPBP4	Nucleolar GTP-binding protein 1	1	1	420000	1	1	90000
GULP1	PTB domain-containing engulfment adapter protein 1				4	4	180000
H1F0	Histone H1.0				1	1	500000
H2AFY	Core histone macro-H2A.1	3	4	240000	6	6	120000
H2AFY2	Core histone macro-H2A.2				3	3	71000
H2AFZ; H2AFV	Histone H2A.Z; Histone H2A.V	3	4	1000000	2	5	9700000
HIST1H1A/C/D/E; HIST1H1T	Histone H1.1/2/3/4; Histone H1t	1	2	400000	1	1	1100000
HIST1H2AB/C/D/E/G/H/J; HIST3H2A; H2AFJ	Histone H2A type 1-B/C/D/E/G/H/J; Histone H2A type 3; Histone H2A.J	3	11	8100000	3	12	11000000
HIST1H2BB/J/O; HIST2H2BE; HIST3H2BB	Histone H2B type 1-B/J/O; Histone H2B type 2-E; Histone H2B type 3-B				4	17	240000
HIST1H2BC/D/E/F/G/H/I/K/L/M/N; HIST2H2BF; H2BFS	Histone H2B type 1-C/D/E/F/G/H/I/K/L/M/N; Histone H2B type 2-F; Histone H2B type F-S	4	9	4400000	4	17	61000
HIST1H3A; HIST2H3A; HIST3H3; H3F3A/C	Histone H3.1; Histone H3.2; Histone H3.1t; Histone H3.3; Histone H3.3C
HIST1H4A	Histone H4	5	9	3500000	8	23	13000000
HIST2H2AA3; HIST2H2AC	Histone H2A type 2-A; Histone H2A type 2-C
HNRNPA0	Heterogeneous nuclear ribonucleoprotein A0				1	1
HNRNPA1	Heterogeneous nuclear ribonucleoprotein A1				3	3	320000
HNRNPA2B1	Heterogeneous nuclear ribonucleoproteins A2/B1				1	1	190000
HNRNPC	Heterogeneous nuclear ribonucleoproteins C1/C2	1	1		4	14	310000
HNRNPD	Heterogeneous nuclear ribonucleoprotein D0
HNRNPF	Heterogeneous nuclear ribonucleoprotein F				4	13	510000
HNRNPH1	Heterogeneous nuclear ribonucleoprotein H	3	5	1700000	5	15	790000
HNRNPH3	Heterogeneous nuclear ribonucleoprotein H3				1	1	59000
HNRNPK	Heterogeneous nuclear ribonucleoprotein K	1	1	660000	3	4	280000
HNRNPM	Heterogeneous nuclear ribonucleoprotein M				1	1	390000
HNRNPU	Heterogeneous nuclear ribonucleoprotein U	3	4	440000	3	4	160000
HNRNPUL1	Heterogeneous nuclear ribonucleoprotein U-like protein 1
HSD17B12	Very-long-chain 3-oxoacyl-CoA reductase				4	4	340000
HSP90AA1; HSP90AB1; TRAP1	Heat shock protein HSP 90-alpha; Heat shock protein HSP 90-beta; Heat shock protein 75 kDa, mitochondrial	1	4	170000	1	2	220000
HSP90AB1	Heat shock protein HSP 90-beta
HSPA1A; HSPA1L	Heat shock 70 kDa protein 1A/1B; Heat shock 72 kDa 1-like
HSPA6; HSPA1A	Heat shock 70 kDa protein 6; Heat shock 70 kDa 1A/1B				1	1	28000
HSPA8	Heat shock cognate 71 kDa protein	1	1	95000	1	1	17000
HSPB1	Heat shock protein beta-1				2	2	48000
ILF2	Interleukin enhancer-binding factor 2	2	2	93000	4	6	110000
ILF3	Interleukin enhancer-binding factor 3				1	1	79000
IMP4	U3 small nucleolar ribonucleoprotein protein IMP4				1	1	40000
ISY1	Pre-mRNA-splicing factor ISY1 homolog				1	1	97000
KPNA2	Importin subunit alpha-1	1	1	260000	1	2	430000
KRR1	KRR1 small subunit processome component homolog				1	1	61000
KTN1	Kinectin				1	1	110000
LMNA	Prelamin-A/C				1	1	120000
LMNB1	Lamin-B1
LMNB2	Lamin-B2
LRAT	Lecithin retinol acyltransferase				1	1	83000
LRRC59	Leucine-rich repeat-containing protein 59	6	8	2300000	11	25	10000000
LUC7L2	Putative RNA-binding protein Luc7-like 2				1	2	150000
LUC7L3	Luc7-like protein 3	1	1	430000	2	2	440000
LYAR	Cell growth-regulating nucleolar protein	3	5	1200000	4	11	880000
MATR3	Matrin-3				1	1	350000
MCCC2	Methylcrotonoyl-CoA carboxylase beta chain, mitochondrial	1	1	240000	3	3	150000
MED19	Mediator of RNA polymerase II transcription subunit 19				2	3	110000
MFAP1	Microfibrillar-associated protein 1
MMTAG2	Multiple myeloma tumor-associated protein 2	1	1	69000	3	3	220000
MRPL10	39S ribosomal protein L10, mitochondrial				1	1	210000
MRPL14	39S ribosomal protein L14, mitochondrial				2	2	280000
MRPS12	28S ribosomal protein S12, mitochondrial				2	2	1200000
MTDH	Protein LYRIC
MUC16	Mucin-16				1	1
MYBBP1A	Myb-binding protein 1A
MYH9	Myosin-9
MYO1B	Unconventional myosin-Ib	1	1	38000	1	1	57000
MYO1C	Unconventional myosin-Ic	1	1	37000	1	1	21000
NAT10	N-acetyltransferase 10	1	1	31000
NCBP1	Nuclear cap-binding protein subunit 1
NCKAP5L	Nck-associated protein 5-like
NCL	Nucleolin
NCOA5	Nuclear receptor coactivator 5				1	1	180000
NGDN	Neuroguidin	1	2	96000	2	3	490000
NHP2	H/ACA ribonucleoprotein complex subunit 2				1	1	37000
NIFK	MKI67 FHA domain-interacting nucleolar phosphoprotein				3	4	420000
NOC4L	Nucleolar complex protein 4 homolog	1	1		1	1	190000
NOLC1	Nucleolar and coiled-body phosphoprotein 1
NOM1	Nucleolar MIF4G domain-containing protein 1
NONO	Non-POU domain-containing octamer-binding protein				2	2	28000
NOP56	Nucleolar protein 56	3	5	240000	1	1	61000
NOP58	Nucleolar protein 58	4	6	2100000	11	25	1300000
NPM1	Nucleophosmin				1	1	130000
NUDT21	Cleavage and polyadenylation specificity factor subunit 5				2	2	56000
NUMA1	Nuclear mitotic apparatus protein 1
NUSAP1	Nucleolar and spindle-associated protein 1				1	1
OSBPL8	Oxysterol-binding protein-related protein 8	1	2	250000	1	1	310000
PABPC1	Polyadenylate-binding protein 1				5	5	130000
PCBP1	Poly(rC)-binding protein 1				1	1	310000
PCCB	Propionyl-CoA carboxylase beta chain, mitochondrial				4	5	470000
PFKP	ATP-dependent 6-phosphofructokinase, platelet type	1	1	120000
PGAM5	Serine/threonine-protein phosphatase PGAM5, mitochondrial				4	5	410000
PHB2	Prohibitin-2	1	1	68000
PNISR	Arginine/serine-rich protein PNISR
PNN	Pinin
POLR2A	DNA-directed RNA polymerase II subunit RPB1
POTEE	POTE ankyrin domain family member E				6	29
PPIG	Peptidyl-prolyl cis-trans isomerase G	1	1	160000
PPP1CA/B/C	Serine/threonine-protein phosphatase PP1-alpha/beta/gamma catalytic subunit				2	3	360000
PRKRA	Interferon-inducible double-stranded RNA-dependent protein kinase activator A	2	2	57000	1	1	67000
PRPF19	Pre-mRNA-processing factor 19	4	4	860000	4	5	220000
PRPF38A	Pre-mRNA-splicing factor 38A				1	1
PRPF40A	Pre-mRNA-processing factor 40 homolog A	3	3	140000	1	1	180000
PRPF6	Pre-mRNA-processing factor 6
PRPF8	Pre-mRNA-processing-splicing factor 8
PTPMT1	Phosphatidylglycerophosphatase and protein-tyrosine phosphatase 1				1	1	74000
PTRF	Polymerase I and transcript release factor	4	8	5400000	6	21	1200000
PUF60	Poly(U)-binding-splicing factor PUF60	2	4	950000	6	15	950000
RAB11FIP1; RAB11FIP2	Rab11 family-interacting protein 1; Rab11 family-interacting protein 2				1	1	31000
RALGAPB	Ral GTPase-activating protein subunit beta
RALY; RALYL	RNA-binding protein Raly; RNA-binding Raly-like protein				1	2	42000
RBFA	Putative ribosome-binding factor A, mitochondrial				3	5	210000
RBM15	Putative RNA-binding protein 15
RBM17	Splicing factor 45				1	1	44000
RBM25	RNA-binding protein 25	4	4	200000	1	1	260000
RBM39	RNA-binding protein 39	3	3	300000	4	5	94000
RBMX	RNA-binding motif protein, X chromosome				1	2	81000
RCN2	Reticulocalbin-2	1	1	110000	2	2	380000
RNF2	E3 ubiquitin-protein ligase RING2				1	1	81000
RNH1	Ribonuclease inhibitor	2	2	100000	7	10	450000
RNPS1	RNA-binding protein with serine-rich domain 1				1	1
RPL10	60S ribosomal protein L10	2	3	160000	5	10	2400000
RPL10A	60S ribosomal protein L10a				1	1	91000
RPL12	60S ribosomal protein L12				1	1	22000
RPL13	60S ribosomal protein L13	1	1	300000	3	3	63000
RPL14	60S ribosomal protein L14				1	1	67000
RPL17	60S ribosomal protein L17	4	6	3600000	6	12	6900000
RPL18	60S ribosomal protein L18				2	3	240000
RPL18A	60S ribosomal protein L18a				2	2	31000
RPL22	60S ribosomal protein L22	1	1	230000	2	2	240000
RPL22L1	60S ribosomal protein L22-like 1	2	5	2600000	3	9	1700000
RPL23	60S ribosomal protein L23	7	60	45000000	9	118	80000000
RPL23A	60S ribosomal protein L23a	6	21	13000000	9	40	990000
RPL24	60S ribosomal protein L24	5	15	6200000	6	21	1000000
RPL26	60S ribosomal protein L26	1	1	500000	4	6	1300000
RPL27A	60S ribosomal protein L27a	1	3	410000	2	6	220000
RPL28	60S ribosomal protein L28				2	2	1500000
RPL29	60S ribosomal protein L29	1	1	560000	1	1	120000
RPL3	60S ribosomal protein L3				1	1	68000
RPL30	60S ribosomal protein L30				1	1	440000
RPL31	60S ribosomal protein L31	1	1	1300000	2	2	520000
RPL34	60S ribosomal protein L34				1	1	170000
RPL35	60S ribosomal protein L35	1	1	1400000	3	4	3700000
RPL36A	60S ribosomal protein L36a	2	5	2500000	2	4	6700000
RPL37A	60S ribosomal protein L37a	1	4		3	4	2700000
RPL38	60S ribosomal protein L38	5	9	5100000	5	14	8700000
RPL4	60S ribosomal protein L4	1	1		1	1	58000
RPL6	60S ribosomal protein L6				1	2	310000
RPL7	60S ribosomal protein L7				1	1	420000
RPL7A	60S ribosomal protein L7a	1	1	140000	3	3	280000
RPL8	60S ribosomal protein L8	2	3	130000	4	4	370000
RPLP0	60S acidic ribosomal protein P0	1	1	250000	6	8	540000
RPLP2	60S acidic ribosomal protein P2				2	3	480000
RPN2	Dolichyl-diphosphooligosaccharide--protein glycosyltransferase subunit 2
RPS10	40S ribosomal protein S10				2	2	61000
RPS11	40S ribosomal protein S11	2	2	450000	3	7	120000
RPS13	40S ribosomal protein S13				4	6	1100000
RPS14	40S ribosomal protein S14	1	1	1100000	3	3	1400000
RPS15A	40S ribosomal protein S15a				1	1	110000
RPS16	40S ribosomal protein S16	1	1	1200000	2	2	2600000
RPS18	40S ribosomal protein S18				3	3	540000
RPS23	40S ribosomal protein S23	2	9	2300000	3	12	13000000
RPS24	40S ribosomal protein S24	2	3	1600000	2	7	11000000
RPS25	40S ribosomal protein S25				2	3	360000
RPS26	40S ribosomal protein S26	1	3	7000000	3	7	10000000
RPS27	40S ribosomal protein S27	1	1	3500000	2	2	410000
RPS3	40S ribosomal protein S3				2	2	130000
RPS3A	40S ribosomal protein S3a	3	3	140000	7	11	430000
RPS4X	40S ribosomal protein S4, X isoform	4	7	1700000	8	29	2400000
RPS5	40S ribosomal protein S5	1	2	1700000	1	2	510000
RPS6	40S ribosomal protein S6	3	6	1600000	7	15	11000000
RPS7	40S ribosomal protein S7	3	3	3700000	4	6	1900000
RPS8	40S ribosomal protein S8	3	3	170000	5	10	420000
RPS9	40S ribosomal protein S9	1	1	210000	1	1	230000
RRBP1	Ribosome-binding protein 1
RRP1	Ribosomal RNA processing protein 1 homolog A	4	4	320000	2	3	130000
RRP12	RRP12-like protein				1	1	51000
SAP30BP	SAP30-binding protein				1	1
SART1	U4/U6.U5 tri-snRNP-associated protein 1
SDAD1	Protein SDA1 homolog
SF3B1	Splicing factor 3B subunit 1	1	1
SF3B2	Splicing factor 3B subunit 2
SF3B3	Splicing factor 3B subunit 3				1	1
SF3B4	Splicing factor 3B subunit 4	1	1	82000
SF3B6	Splicing factor 3B subunit 6
SFPQ	Splicing factor, proline- and glutamine-rich				1	1	250000
SGPL1	Sphingosine-1-phosphate lyase 1	4	6	730000	3	4	310000
SLC25A1	Tricarboxylate transport protein, mitochondrial	1	1	150000	2	2	200000
SLC25A3	Phosphate carrier protein, mitochondrial				2	2	490000
SLC25A5	ADP/ATP translocase 2				6	9	200000
SLC25A6	ADP/ATP translocase 3	3	4	800000	6	13	670000
SLC6A3	Sodium-dependent dopamine transporter
SMARCA4	Transcription activator BRG1
SMARCA5	SWI/SNF-related matrix-associated actin-dependent regulator of chromatin subfamily A member 5
SMN1	Survival motor neuron protein				1	1	120000
SND1	Staphylococcal nuclease domain-containing protein 1
SNRNP200	U5 small nuclear ribonucleoprotein 200 kDa helicase	4	4	100000
SNRNP40	U5 small nuclear ribonucleoprotein 40 kDa protein				2	2	15000
SNRNP70	U1 small nuclear ribonucleoprotein 70 kDa				1	1	21000
SNRPA	U1 small nuclear ribonucleoprotein A				1	1	90000
SNRPA1	U2 small nuclear ribonucleoprotein A'				4	5	150000
SNRPB2	U2 small nuclear ribonucleoprotein B''				1	1	140000
SNRPD1	Small nuclear ribonucleoprotein Sm D1	1	2	6000000	1	2	4000000
SNRPD2	Small nuclear ribonucleoprotein Sm D2				2	2	120000
SNRPD3	Small nuclear ribonucleoprotein Sm D3				1	2	270000
SNRPF	Small nuclear ribonucleoprotein F
SRP9	Signal recognition particle 9 kDa protein				1	1	1200000
SRRM1	Serine/arginine repetitive matrix protein 1				1	1	180000
SRRM2	Serine/arginine repetitive matrix protein 2	2	2	35000	2	3	120000
SRSF1	Serine/arginine-rich splicing factor 1	6	10	780000	7	18	2700000
SRSF10	Serine/arginine-rich splicing factor 10	3	6	1100000	5	12	2000000
SRSF2	Serine/arginine-rich splicing factor 2	1	1	300000	2	3	890000
SRSF3	Serine/arginine-rich splicing factor 3	2	6	2100000	2	6	170000
SRSF5	Serine/arginine-rich splicing factor 5	1	1	44000	4	7	300000
SRSF6	Serine/arginine-rich splicing factor 6	2	2	130000	5	10	450000
SRSF7	Serine/arginine-rich splicing factor 7	4	8	430000	6	13	1900000
SRSF9	Serine/arginine-rich splicing factor 9	1	1	260000	3	5	49000
SSR1	Translocon-associated protein subunit alpha				1	1	390000
SSRP1	FACT complex subunit SSRP1	2	2	81000	1	1	23000
STAU1	Double-stranded RNA-binding protein Staufen homolog 1				1	1	39000
SUPT16H	FACT complex subunit SPT16
SYNCRIP	Heterogeneous nuclear ribonucleoprotein Q
TAF15; FUS	TATA-binding protein-associated factor 2N; RNA-binding protein FUS				1	1	120000
TBL2	Transducin beta-like protein 2				1	1	160000
TCOF1	Treacle protein
TEX10	Testis-expressed sequence 10 protein	1	1		1	1	32000
THOC2	THO complex subunit 2
THRAP3	Thyroid hormone receptor-associated protein 3
TJP1	Tight junction protein ZO-1	1	1	77000	3	3	200000
TJP3	Tight junction protein ZO-3
TMA16	Translation machinery-associated protein 16	1	2		3	6	360000
TMCO1	Transmembrane and coiled-coil domain-containing protein 1				1	2	130000
TMEM183A; TMEM183B	Transmembrane protein 183A; Transmembrane protein 183B				1	1
TMEM33	Transmembrane protein 33				1	1
TMOD3	Tropomodulin-3				1	1	21000
TRA2A	Transformer-2 protein homolog alpha	2	5	260000	3	16	320000
TRA2B	Transformer-2 protein homolog beta	2	5	370000	2	16	1400000
TRMT10C	Mitochondrial ribonuclease P protein 1				1	1	40000
TUBA1B; TUBA1C	Tubulin alpha-1B chain; Tubulin alpha-1C chain	9	20	5400000	11	28	5100000
TUBB	Tubulin beta chain	9	16	4100000	12	24	640000
TUBB2A; TUBB2B	Tubulin beta-2A chain; Tubulin beta-2B chain
TUBB4A	Tubulin beta-4A chain	5	9
TUBB4B	Tubulin beta-4B chain	7	11	1100000	11	21	220000
U2AF1	Splicing factor U2AF 35 kDa subunit
U2AF2	Splicing factor U2AF 65 kDa subunit	3	4	460000	5	7	530000
U2SURP	U2 snRNP-associated SURP motif-containing protein	3	3	140000	3	4	230000
UBR4	E3 ubiquitin-protein ligase UBR4
UTP14A	U3 small nucleolar RNA-associated protein 14 homolog A
UTP15	U3 small nucleolar RNA-associated protein 15 homolog				1	1	16000
UTRN	Utrophin
VANGL1	Vang-like protein 1	1	1	240000	3	3	79000
WNT16	Protein Wnt-16	1	1	66000	1	1	230000
YBX1	Nuclease-sensitive element-binding protein 1	4	16	4200000	6	18	1800000
ZNF638	Zinc finger protein 638
