# Supplementary material for: The S-phase-induced lncRNA SUNO1 promotes cell proliferation by controlling YAP1/Hippo signaling pathway
Source: eLife. 2020 Oct 27;9:e55102. doi: 10.7554/eLife.55102 (PMC7591261; doi:10.7554/eLife.55102)
Supplement: Supplementary file 8. [file elife-55102-supp8.xlsx]

## Sheet: Primers and Oligos
qPCR
SUNO1-F	CACCAACAGACGTGAGTTCGA
SUNO1-R	AGAACACTGCGAGGCTCACA
AL360004.1-F	GAAGGACCTGGAAAACCACA
AL360004.1-R	TGGGAGAGTCTTCCCCTCTT
BX640514.2-F	CTGCGTTTTAGCTGCTTGTG
BX640514.2-R	TTCTGGTTTCCTCCTTGTGG
linc02535-F	GAATTCCTGGGCTCAAGCTA
linc02535-R	GATGGTTCAAGGCTGGTTGT
AC104024.2-F	CTGTGGTGGCCTTTGTTTTT
AC104024.2-R	CCACTCAGCACCCTTTTCTC
linc01484-F	ACTCCCCAAAGGCAAAAACT
linc01484-R	AGGGCGTTACCATTTGAGTG
AC092818.1-F	CTGGGCTGTCTCCACACATA
AC092818.1-R	TCGAGGAAACTTCCTGATGC
linc02454-F	GACTCCATCTGGGATTTGGA
linc02454-R	CATGACCTTGGAAGCCTCTT
linc02255-F	AGAAGGCCTCCGTCTACACA
linc02255-R	GAGCCAGAGACAGACCTCTCA
AL359834.1-F	GACTCAAGGGTGCCTGAGAG
AL359834.1-R	GTGGAAGGGAAGAGCATCAG
GAPDH-F	GAAACTGTGGCGTGATGGC
GAPDH-R	CACCACTGACACGTTGGCAG
18S-F	CGCCGCTAGAGGTGAAATTCT
18S-R	CGAACCTCCGACTTTCGTTCT
p21-F	GCAGACCAGCATGACAGATTT
p21-R	GGATTAGGGCTTCCTCTTGGA
CCND1-F	GCTGCGAAGTGGAAACCATC
CCND1-R	CCTCCTTCTGCACACATTTGAA
CTGT-F	CATTCTCCAGCCATCAAGAG
CTGF-R	CACAAGCTGTCCAGTCTAATC
CYR61-F	GGCACACCTAGACAAACAA
CYR61-R	CTCCTCAAGAATGAGCAAGG
AMOTL2-F	AGTTATGCCTCCTCCTCAA
AMOTL2-R	GTCCCGTGGGCATTTATAG
AJUBA-F	GCCTGTATTCCCTGTTTCTC
AJUBA-R	CCACAGAGATCTGCTCATTAC
CCNA2-F	TCCTCCTTGGAAAGCAAAC
CCNA2-R	GGCATCTTCACGCTCTATTT
CDC6-F	TGCTACCAGCAAGCAAAG
CDC6-R	GGAGCACCAGAAAGGTAAAG
p15PAF-F	CCAAGTGGCAAAAAGGAATTG
p15PAF-R	CCTGCCTCTTCAGGAATCTGA
YAP1-F	CCAGTTGCAGTTTTCAGGCTAAT
YAP1-R	CAATGGACAAGGAAGAGCAAAAT
KCTD15-F	GTCCTGAGCTTGGTGTTATT
KCTD15-R	GACGCCTTCTGTCTCTTTC
LSM14A-F	TCAGTCCGAGTTCCTTAGTT
LSM14A-R	GAACCAACCGCACTACTTT
GPI-F	ATGCTCCCTCTGTGTTAGA
GPI-R	CCTCCGTGGCATCTTTATTT
UBA2-F	GTGCAAAGAGGTCACGTATAG
UBA2-R	CTGGTTCTGCCCAGATAAAC
WTIP-F	CTACAACGTGGGTGAGAAAG
WTIP-R	CCATGATGAGATGTCCACAC
ZNF302-F	TCCAAGTGCATCCCTTATTC
ZNF302-R	GGTTGCTCTACCATTCATCTT
CDT1-F	CGGTGGACGAGGTTTCCAG
CDT1-R	CTGCCGGGGTGGATTTCTT
E2F3-F	AGAAAGCGGTCATCAGTACCT
E2F3-R	TGGACTTCGTAGTGCAGCTCT
MCM6-F	GAGGAACTGATTCGTCCTGAGA
MCM6-R	TTCCAGGTCCACAAAACTCAC
GADD45B-F	CCGTTGGTTTCCGCAACTT
GADD45B-R	GCAGCGAAATCCTTCCAGAA
UHRF1-F	TCGGAGGGCTCGTTCATC
UHRF1-R	ACCTTTTTAGGGAACGGAGGAA
CEBPA-F	CTTGGTGCGTCTAAGATGAG
CEBPA-R	CATTGGAGCGGTGAGTTT
FXYD5-F	CAGGTGAGTCCATCAGAAAC
FXYD5-R	TCTGTGTCTTCCCTCTCTG
PLEKHG2-F	ACTTAGCCTCTTGTGCTTTAG
PLEKHG2-R	GAGGACCCACACCAAATAAG
MYADM-F	CATCAACCTACTGGCGTATG
MYADM-R	CGGGCAAGAAGAACAAAGA
ChIP or RNA-IP
WTIP-pro-F	CTGTCGACTGCTTGGATCT
WTIP-pro-R	TGGGAAGAGCTCGGATTT
b-globin-pro-F	AGGTCAGGCCCTCAAGAGTC
b-globin-pro-R	CAGTCAGTTCTTTGGACAAGTCTTA
GAPDH-genebody-F	TAGAGCGGCCGCCATGT
GAPDH-genebody-R	GCAGGAGCGCAGGGTTAGT
SUNO1-genebody-F	AGGGGACAGGGGAGAGAATA
SUNO1-genebody-R	ACGGGTCCCAGACACAGAT
PCR
SUNO1-cloneF	ACACCTGAGC TCGCCCTGC
SUNO1-cloneR	GAAACCAAAACTAGCTAGCATTTAT
SUNO1-northernF	AAATGGATGGAGGGTGGAC
SUNO1-northernR	GGGTCCTGTCAGGCACTTT
3C
SUNO1 region	TAGAACATGTTTCTTTGTCCAATAGGTGCTGAAAGGCCCG
WTIP region	GGAGAGACGGGGTTTCACCATGTTGGCCAGGC
control region	ACCCCAGGCTCTCAGCAGCCGTGACCTCACAGCACCAT
siRNA name	sense(5'-3')	antisense (5'-3')
siNC	UUCUCCGAACGUGUCACGUTT	ACGUGACACGUUCGGAGAATT
siSUNO1-a	GCACGUGGUAAUACAUAAUTT	AUUAUGUAUUACCACGUGCTT
siSUNO1-b	GAGGAAUGCUGAUCUAGAATT	UUCUAGAUCAGCAUUCCUCTT
siSUNO1-c	GGCGUGAUUUAGAUGGAAATT	UUUCCAUCUAAAUCACGCCTT
siDDX5	CCCAAUAAGACUUUAGAAGUATT	UACUUCUAAAGUCUUAUUGGGTT
dsiWTIP	ACGUGGGUGAGAAAGUGUACUGCCA	UGGCAGUACACUUUCUCACCCACGUUG
psiWTIP	Dharmacon Smartpool, L-023639-02-0005
gRNA
SUNO1-5'gRNA	CCTAACCTAGATCTCCC
SUNO1-3'gRNA	AGGGTGGACAGGGATGC

## Sheet: Antibodies
Antibody	Vendor	Cat#	Usage
Anti-BrdU (Mose monoclonal)	Sigma-Aldrich	B9434	IF (1:800)
Anti-MCM3 (Rabbit polyclonal)		clone 738	WB (1:1000)
Anti-Orc2 (Rabbit polyclonal)		clone 205-6	WB (1:500)
Anti-SRSF1 (Mouse monoclonal)		clone 96	WB (1:1000)
Anti-p53 (Mouse monoclonal)	Santa Cruz	sc-126	WB (1:500)
Anti-B"-U2 snRNP (Mouse polyclonal)			WB (1:250)
Anti-Chk1 (Rabbit polyclonal)	Cell Signaling	#2345	WB (1:500)
Anti-pChk1-S345 (Rabbit polyclonal)	Cell Signaling	#2348	WB (1:500)
Anti-Chk2 (Rabbit polyclonal)	Cell Signaling	#2662	WB (1:500)
Anti-pChk2-T68 (Rabbit polyclonal)	Cell Signaling	#2661	WB (1:500)
Anti-pBRCA1-S1524 (Rabbit polyclonal)	Cell Signaling	#9009	WB (1:400)
Anti-RPA32 (Rat polyclonal)	Cell Signaling	#2208	WB (1:700), IF (1:500)
Anti-gH2AX (Rabbit monoclonal)	Cell Signaling	#9718	WB (1:700)
Anti-aTubulin (Mouse monoclonal)	Sigma-Aldrich	T5168	WB (1:5000)
Anti-WTIP (Mouse polyclonal)	Sigma-Aldrich	SAB1411722	WB (1:200)
Anti-Cyclin D1 (Rabbit polyclonal)	Cell Signaling	#2922	WB (1:500)
Anti-LATS1 (Mouse monoclonal)	Santa Cruz	sc-398560	WB (1:100)
Anti-pLATS1-S909 (Rabbit polyclonal)	Cell Signaling	#9157	WB (1:1000)
Anti-YAP1 (Mouse monoclonal)	Santa Cruz	sc-376830	WB (1:100), IF (1:50)
Anti-TAZ (Mouse monoclonal)	Santa Cruz	sc-518036	WB (1:100)
Anti-CTGF (Mouse monoclonal)	Santa Cruz	sc-365970	WB (1:100)
Anti-b-Actin (Mouse monoclonal)	Santa Cruz	sc-47778	WB (1:300)
Anti-p15/PAF (Rabbit polyclonal)	Santa Cruz	sc-9996	WB (1:200)
Anti-GFP (Mouse monoclonal)	Santa Cruz	sc-67280	WB (1:100)
Anti-DDX5 (Mouse monoclonal)	Millipore	clone204, #05-580	WB (1:200)
Anti-Pol II (Mouse monoclonal)	Millipore	clone CTD4H8, #05-623	WB (1:1000), ChIP (5 mg/experiment)
Anti-53BP1 (Rabbit polyclonal)	Cell Signaling	#4937	IF (1:300)
Anti-DDX5 (Rabbit polyclonal)	BETHYL	A300-523A	ChIP (5 mg/experiment)
Anti-BrdU (CldU) (Rat monoclonal)	Bio-Rad	OBT0030G, Clone BU1/75 (ICR1)	DNA fiber assay (1:200)
Anti-BrdU (IdU) (Mouse monoclonal)	BD	#347580, clone B44	DNA fiber assay (1:200)
